# Supplementary material for: Bioinformatics analysis identified CDC20 as a potential drug target for cholangiocarcinoma
Source: PeerJ. 2021 Mar 17;9:e11067. doi: 10.7717/peerj.11067 (PMC7980698; doi:10.7717/peerj.11067)
Supplement: Supplemental Information 1 [file peerj-09-11067-s001.xlsx]

## Sheet: Batch 1
KKU-100	Cp1	Cp2	Cp3	Average Cp	SD Cp	ΔCp1	ΔCp2	ΔCp3	AverageΔCp	SD	2^-ΔCp1	2^-ΔCp2	2^-ΔCp3	Average 2^-ΔCp1	SD 2^-ΔCp1
Actin	18.49	18.37	18.72	18.5267	0.177858
CDC20	28.92	28.8	28.82	28.8467	0.064291	10.39	10.27	10.29	10.3167	0.064291	0.000745244	0.000809882	0.000798732	0.00078462	3.45531e-05
KKU-213A	Cp1	Cp2	Cp3	Average Cp	SD Cp	ΔCp1	ΔCp2	ΔCp3	AverageΔCp	SD	2^-ΔCp1	2^-ΔCp2	2^-ΔCp3	Average 2^-ΔCp1	SD 2^-ΔCp1
Actin	18.28	17.61	17.97	17.9533	0.335311
CDC20	28.94	28.7	28.7	28.78	0.138564	10.99	10.75	10.75	10.83	0.138564	0.000491678	0.000580668	0.000580668	0.000551004	5.13784e-05
KKU-213B	Cp1	Cp2	Cp3	Average Cp	SD Cp	ΔCp1	ΔCp2	ΔCp3	AverageΔCp	SD	2^-ΔCp1	2^-ΔCp2	2^-ΔCp3	Average 2^-ΔCp1	SD 2^-ΔCp1
Actin	-	17.6	17.28	17.44	0.226274
CDC20	28.65	28.46	28.63	28.58	0.104403	11.21	11.02	11.19	11.14	0.104403	0.000422137	0.000481559	0.00042803	0.000443909	3.27388e-05
KKU-452	Cp1	Cp2	Cp3	Average Cp	SD Cp	ΔCp1	ΔCp2	ΔCp3	AverageΔCp	SD	2^-ΔCp1	2^-ΔCp2	2^-ΔCp3	Average 2^-ΔCp1	SD 2^-ΔCp1
Actin	16.53	16.74	16.82	16.6967	0.149778
CDC20	28.36	28.07	28.02	28.15	0.183576	11.66	11.37	11.32	11.45	0.183576	0.000309023	0.000377823	0.000391147	0.000359331	4.40749e-05

## Sheet: Batch 2
KKU-100	Cp1	Cp2	Cp3	Average Cp	SD Cp	ΔCp1	ΔCp2	ΔCp3	AverageΔCp	SD	2^-ΔCp1	2^-ΔCp2	2^-ΔCp3	Average 2^-ΔCp1	SD 2^-ΔCp1
Actin	17.7	17.87	20.4	18.6567	1.51216
CDC20	27.56	28.1	28.71	28.1233	0.575355	8.9	9.44	10.05	9.46333	0.575355	0.00209331	0.00143972	0.000943297	0.00149211	0.000576792
KKU-213A	Cp1	Cp2	Cp3	Average Cp	SD Cp	ΔCp1	ΔCp2	ΔCp3	AverageΔCp	SD	2^-ΔCp1	2^-ΔCp2	2^-ΔCp3	Average 2^-ΔCp1	SD 2^-ΔCp1
Actin	17.16	18.02	19.19	18.1233	1.01894
CDC20	27.88	27.91	28.25	28.0133	0.205508	9.76	9.79	10.13	9.89333	0.205508	0.00115331	0.00112958	0.000892414	0.00105843	0.000144268
KKU-213B	Cp1	Cp2	Cp3	Average Cp	SD Cp	ΔCp1	ΔCp2	ΔCp3	AverageΔCp	SD	2^-ΔCp1	2^-ΔCp2	2^-ΔCp3	Average 2^-ΔCp1	SD 2^-ΔCp1
Actin	19.37	19.63	20.94	19.98	0.841487
CDC20	29.82	32.25	30.54	30.87	1.24816	9.84	12.27	10.56	10.89	1.24816	0.0010911	0.000202471	0.000662404	0.000651992	0.000444407
KKU-452	Cp1	Cp2	Cp3	Average Cp	SD Cp	ΔCp1	ΔCp2	ΔCp3	AverageΔCp	SD	2^-ΔCp1	2^-ΔCp2	2^-ΔCp3	Average 2^-ΔCp1	SD 2^-ΔCp1
Actin	17.71	18.76	17.93	18.1333	0.553745
CDC20	28.31	28.45	28.63	28.4633	0.160416	10.18	10.32	10.5	10.3333	0.160416	0.000862015	0.000782295	0.000690534	0.000778281	8.58108e-05

## Sheet: Batch 3
KKU-100	Cp1	Cp2	Cp3	Average Cp	SD Cp	ΔCp1	ΔCp2	ΔCp3	AverageΔCp	SD	2^-ΔCp1	2^-ΔCp2	2^-ΔCp3	Average 2^-ΔCp1
Actin	17.38	17.58	17.5	17.4867	0.100664
CDC20	28.36	28.02	28.06	28.1467	0.185831	10.87	10.53	10.57	10.6567	0.185831	0.000534323	0.000676323	0.000657829	0.000622825
KKU-213A	Cp1	Cp2	Cp3	Average Cp	SD Cp	ΔCp1	ΔCp2	ΔCp3	AverageΔCp	SD	2^-ΔCp1	2^-ΔCp2	2^-ΔCp3	Average 2^-ΔCp1
Actin	16.18	16.48	16.5	16.3867	0.179258
CDC20	27.18	27.93	28.9	28.0033	0.862342	10.79	11.54	12.51	11.6133	0.862342	0.000564789	0.000335826	0.000171441	0.000357352
KKU-213B	Cp1	Cp2	Cp3	Average Cp	SD Cp	ΔCp1	ΔCp2	ΔCp3	AverageΔCp	SD	2^-ΔCp1	2^-ΔCp2	2^-ΔCp3	Average 2^-ΔCp1
Actin	16.77	16.69	16.64	16.7	0.0655744
CDC20	28.35	28.25	27.78	28.1267	0.304357	11.65	11.55	11.08	11.4267	0.304357	0.000311172	0.000333506	0.000461942	0.000368873
KKU-452	Cp1	Cp2	Cp3	Average Cp	SD Cp	ΔCp1	ΔCp2	ΔCp3	AverageΔCp	SD	2^-ΔCp1	2^-ΔCp2	2^-ΔCp3	Average 2^-ΔCp1
Actin	16.73	16.34	16.48	16.5167	0.197569
CDC20	29.82	28.03	27.83	28.56	1.09576	13.3	11.51	11.31	12.04	1.09576	9.91519e-05	0.000342882	0.000393868	0.000278634
