# Supplementary material for: Bioinformatics analysis identified CDC20 as a potential drug target for cholangiocarcinoma
Source: PeerJ. 2021 Mar 17;9:e11067. doi: 10.7717/peerj.11067 (PMC7980698; doi:10.7717/peerj.11067)
Supplement: Supplemental Information 4 [file peerj-09-11067-s004.xlsx]

## Sheet: Sheet1
Hugo_Symbol	Entrez_Gene_Id	TCGA-3X-AAV9-01	TCGA-3X-AAVA-01	TCGA-3X-AAVB-01	TCGA-3X-AAVC-01	TCGA-3X-AAVE-01	TCGA-4G-AAZO-01	TCGA-4G-AAZT-01	TCGA-W5-AA2G-01	TCGA-W5-AA2H-01	TCGA-W5-AA2I-01	TCGA-W5-AA2O-01	TCGA-W5-AA2Q-01	TCGA-W5-AA2R-01	TCGA-W5-AA2T-01	TCGA-W5-AA2U-01	TCGA-W5-AA2W-01	TCGA-W5-AA2X-01	TCGA-W5-AA2Z-01	TCGA-W5-AA30-01	TCGA-W5-AA31-01	TCGA-W5-AA33-01	TCGA-W5-AA34-01	TCGA-W5-AA36-01	TCGA-W5-AA38-01	TCGA-W5-AA39-01	TCGA-W6-AA0S-01	TCGA-WD-A7RX-01	TCGA-YR-A95A-01	TCGA-ZD-A8I3-01	TCGA-ZH-A8Y1-01	TCGA-ZH-A8Y2-01	TCGA-ZH-A8Y4-01	TCGA-ZH-A8Y5-01	TCGA-ZH-A8Y6-01	TCGA-ZH-A8Y8-01	TCGA-ZU-A8S4-01
	100130426	0	0	0	0	0	0	0	0	0	0	0.5382	0	0.4626	0	0	0.533	0	0	0	0	0	0	0	0	0	0	0	0	0	0	0	0	0	0	0	0
	100133144	2.2265	4.0766	1.4149	0	7.377	6.8986	1.8229	2.5957	2.9089	8.4315	3.7352	7.6114	9.2888	2.4746	7.2735	7.2858	30.3967	8.3831	13.6217	4.6913	3.683	0	0	1.9785	8.149	5.8917	4.4491	5.2653	4.1942	7.0444	14.2524	3.1105	8.802	12.0874	12.8354	1.4409
	100134869	21.7256	22.2241	4.4196	3.8152	7.6043	12.0017	0	7.3676	2.0849	3.5877	3.7998	7.6623	7.827	8.6634	11.1804	12.9673	16.0378	12.1069	30.3666	5.3059	7.7076	5.1335	6.9124	2.9067	0	11.1719	3.393	5.692	15.2233	14.3193	14.0532	9.4864	10.4178	7.8019	15.9712	2.5477
	10357	123.157	81.9325	146.279	241.951	120.093	139.88	73.784	78.0073	117.64	67.1034	84.268	142.295	83.289	121.588	83.2902	128.207	235.193	92.2272	87.8201	127.794	81.1438	63.3984	92.8687	68.8764	64.5751	82.479	117.935	104.873	122.859	100.319	116.588	74.9903	90.2093	139.188	61.8354	132.524
	10431	860.642	991.995	545.035	1091.16	907.659	1008.59	1475.92	1028.84	575.531	1208.53	1709.36	1400.51	1107.9	627.603	711.601	1205.05	862.865	877.506	900.782	1366.29	558.614	1118.07	1668.78	1651.69	1105.94	949.402	827.081	1096.31	790.291	752.788	564.015	1096.9	1145.04	783.188	975.309	1309.24
	136542	0	0	0	0	0	0	0	0	0	0	0	0	0	0	0	0	0	0	0	0	0	0	0	0	0	0	0	0	0	0	0	0	0	0	0	0
	155060	147.523	75.4717	158.989	166.235	174.609	71.3058	302.598	106.974	877.653	159.255	252.96	271.107	169.307	561.259	115.225	116.721	534.252	135.412	766.373	197.353	259.611	111.396	35.7143	162.677	175.786	155.943	192.916	840.254	207.282	175.969	188.18	92.5388	267.774	201.145	201.646	88.7449
	26823	1.0887	1.1435	0	1.0901	1.0332	3.4364	0	0	0.6242	0.601	0.5382	1.6971	1.8504	0.4843	1.3503	0	1.5308	0.4454	0.9775	0	0	0	0	0.4885	0	0.474	0	0	0	0.5622	0.5242	0.4845	0.6515	1.1258	1.2346	0
	280660	0	0	0	0	0	0	0	0	0	0	0	0	0	0	0	0	0	0	0	0	0	0	0	0	0	0	0	0	0	0	7.3385	0	0	0	0	0
	317712	0	0	0	0	0	0	0	0	0	0	0	0	0	0	0	0	0	0	0	0	0	0	0	0	0	0	0	0	0	0	0	0	0	0	0	0
	340602	2.7218	0	0.4862	0	0	0	0	0	33.0836	0	0	0	0	0.4843	0	0	0	0	0	0.3703	1.4238	0.5133	0.576	0	0	0	1.5684	0	0	0	1.5725	0	0	0	1.2346	0
	388795	4.3549	0	1.9448	1.0901	0.5166	1.7182	0	0.5244	15.6055	0	0.5382	0.4243	1.8504	0.4843	0.9002	0.533	3.0616	0	0	1.1108	2.8477	0.5133	1.7281	2.9311	1.1641	0	1.0456	0.5767	0.9709	1.1244	2.0967	0.4845	0	0.3753	1.2346	0.9971
	390284	3.2662	4.0023	1.9448	2.7252	2.583	6.8729	4.2534	1.5732	2.4969	3.0048	4.8439	3.8184	2.3129	1.4528	4.0509	3.7308	4.5924	0.8909	1.955	3.3324	2.373	2.0534	4.0323	4.8852	6.9849	1.422	0.5228	0.5767	2.4272	0	2.0967	0.969	3.5834	2.6269	2.8807	3.49
	391343	0	0	0	0	0	0	0	0	3.7453	0	0	0	0.9252	0	0	0	0	0	0	0	0	0	0	0	0	0	0	0	0	0	0	0	0	0	0	0
	391714	0	0.5718	0	0.545	0	0	0	0	0	0	0	0	0	0.4843	0	0	0	0	0.4888	0	0	0	0	0	0	0	0	0	0	0	0	0	0	0	0	0
	404770	0	0	0	0	0	0	0	0	0	0	0	0	0	0	0	0	0	0	0	0	0	0	0	0	0	0	0	0	0	0	0	0	0	0	0	0
	441362	0	0	0	0	0	0	0	0	0	0	0	0	0	0	0	0	0	0	0	0	0	0	0	0	0	0	0	0	0	0	0	0	0	0	0	0
	442388	0	0	0	0	0	0	0	0	0	0	0	0	0	0	0	0	0	0	0	0	0	0	0	0	0	0	0	0	0	0	0	0	0	0	0	0
	553137	8.7099	9.1481	9.7241	67.0391	163.761	144.33	34.6347	337.179	0.6242	88.3413	110.872	62.7917	17.1158	150.121	189.49	76.7482	1.5308	195.546	6.3539	289.179	13.289	73.4086	89.2857	105.032	83.8184	18.4856	28.2316	290.657	182.524	139.988	76.0058	96.8992	59.9397	9.757	106.584	54.8423
	57714	336.962	194.969	291.236	748.331	992.38	652.921	210.846	768.222	178.527	286.058	254.575	584.641	1008.44	387.409	1316.98	554.826	740.401	737.639	666.178	621.309	710.963	380.904	216.59	297.02	288.708	349.33	371.193	269.896	495.146	799.451	1584.07	685.077	308.494	362.135	551.852	397.856
	645851	2.1775	2.8588	5.8344	11.4457	10.3319	12.0275	0	8.9145	9.3633	6.6106	26.9107	19.5163	18.5035	30.0242	5.8512	25.5827	26.0237	4.4543	14.174	15.181	10.916	3.0801	1.7281	2.4426	18.6263	5.2139	11.5018	8.6505	13.5922	9.5574	25.1605	10.1744	18.894	7.5054	15.6379	2.4928
	652919	8.7099	0	20.0122	3.2702	40.2945	3.4364	0	131.369	0	0	0.0646	38.2647	38.1728	0	1.8364	3.1978	0	45.4254	16.6178	47.3942	11.1248	0	0	0	0	0	0	0	0	3.3732	20.9671	14.0504	0	33.1476	3.2922	0
	653553	385.955	522.584	315.546	539.038	279.995	152.062	1613.25	519.14	160.424	2016.23	770.183	120.916	303.92	379.661	797.569	299.531	80.6225	417.817	365.103	256.595	281.443	595.996	566.244	986.81	193.248	543.192	337.734	355.248	405.825	507.668	287.774	569.283	322.176	61.5442	830.041	490.091
	728045	0	0	0	0	0	0	0	0	0	0	0	0	0	0	0	0	0	0	0	0	0	0	0	0	0	0	0	0	0	0	0	0	0	0	0	0
	728603	0	0	0	0	0	0	0	0	0	0	0	0	1.8504	0	0	0	0	0	0.4888	0	0	0	0	0	0	0	0	0	0	0	0	0	0	0	0	0
	728788	0.5444	0	1.9448	3.8152	0	1.7182	0	0	0	0	1.0764	0	0	0	0.9002	1.5989	1.0205	1.7817	0	0	0	0	0	0	1.1641	0.948	0.5228	0	0	0.5622	0	0.969	0.6515	0	0.4115	0.9971
	729884	81.1105	6.2893	3.8896	0	0.5166	0	0	14.6827	8.7391	0	0	5.5155	0.4626	2.4213	5.4011	0	0	5.7906	0.9775	62.2049	0	78.5421	0	0	1.1641	44.0811	1.0456	0	2.4272	5.0598	0	0	26.3865	0.3753	255.967	0
	8225	506.805	678.673	869.819	978.335	591.502	701.031	2566.61	884.636	1774.66	791.466	532.293	769.198	805.829	553.027	1168	855.423	1253.22	611.581	843.109	631.306	911.248	1736.14	1917.63	898.388	1528.52	902.003	669.194	917.532	880.582	806.198	678.286	686.047	331.623	732.902	410.288	771.781
	90288	7.6211	87.4786	8.7517	8.7205	10.8485	41.2371	216.922	12.5852	69.9126	75.1202	24.7578	19.5163	19.4287	34.8668	32.4069	49.5666	44.9037	124.722	87.9765	8.8864	11.8652	60.5749	25.3456	6.3508	43.0733	11.8497	151.091	62.2837	36.8932	33.1699	23.0638	36.3372	62.2201	8.2559	17.284	11.467
A1BG	1	70.9581	121.641	75.3616	29.9768	126.571	12.2251	201.1	13116.4	428.808	1513.94	6714.39	32.3335	57.6339	109.598	75.409	121.401	180.993	33.3051	64.0274	5374.8	4699.19	23.4497	41.394	20.0293	642.282	27.9607	15570.3	5808.81	48.5437	42.1595	280.037	1485.06	33.045	181.511	1705.03	169.702
A1CF	29974	13.6091	92.0526	7.2931	497.615	62.5081	602.234	361.537	351.337	0	667.067	441.873	218.498	942.292	418.886	856.982	21.319	7.1438	442.762	291.3	453.578	672.52	280.288	274.77	122.13	627.474	45.977	437.067	566.321	330.097	164.163	477.526	39.2442	199.039	1074.77	250.206	101.708
A2BP1	54715	1.6331	97.7702	0.4862	0	2.0664	0	0	0	0	0	0	0.8485	0.9252	0.9685	0	0	1.5308	0	0	2.5919	0	13.347	0	0.4885	0	0	0	114.187	14.0777	0	1.0484	0	3.5834	0.3753	0	0
A2LD1	87769	225.057	158.845	147.791	223.224	145.69	98.7715	83.4938	103.492	116.224	82.3798	142.616	175.766	59.4009	90.9588	40.3781	213.893	153.167	39.5145	126.105	121.059	102.031	73.383	262.425	99.6092	118.929	316.094	119.869	124.066	120.913	63.0004	44.5918	141.269	242.062	184.404	80.8889	79.7557
A2M	2	23986.3	6633.43	11380.6	8129.7	7837.26	2751.72	9766.88	15372.8	5757.12	2468.68	7019.75	5889.69	7134.9	3063.77	9078.42	4888.42	1753.7	10896.5	12861	23844.5	16172.3	2538.96	5100.79	4377.11	60105.9	5840.84	48127.2	6777.36	5577.57	13302.8	7696.42	7119.16	10125.1	18031.5	16030.4	9801.29
A2ML1	144568	15.2422	7.4328	0.9724	164.6	0	0	0	0	0	0	0	0	0	0	0	0	8.6746	2.6726	0.9775	0	0	1.0267	0	0	0	0.474	0	0	0	0.5622	0	9.6899	0.3258	0	0	0
A4GALT	53947	1706.04	316.181	484.745	134.623	321.839	376.289	1362.9	121.133	769.039	43.8702	25.296	160.373	302.533	343.341	572.072	34.6433	642.429	563.029	147.605	549.847	131.941	443.019	267.281	425.012	54.7148	197.18	267.155	110.727	171.845	530.719	422.487	165.213	775.959	437.94	404.938	627.197
A4GNT	51146	19.0528	108.633	28.686	10.9007	24.28	0	1.2153	1.5732	1.2484	23.4375	5.9203	8.0611	44.8711	45.0363	29.2562	11.1924	0.5103	49.4432	8.3089	10.7378	37.4941	23.614	114.055	12.7015	1.1641	10.9018	40.2562	41.5225	4.3689	14.6173	14.1528	14.0504	53.4245	0.7505	12.7572	1.9943
AAA1	404744	0	2.287	0.9724	3.8152	1.0332	0	0	0	0	0.601	0	0	7.864	0	0	0.533	0.5103	7.1269	0	0	0	0.5133	0	0	1.1641	0.474	0	0	0.4854	3.9354	0	0	0	0.3753	0	0
AAAS	8086	888.949	981.704	598.517	691.647	863.231	769.76	1389.64	543.786	1300.25	1365.99	947.255	683.072	1066.73	1239.23	757.061	986.534	799.082	940.757	730.205	831.251	716.659	1079.57	1258.64	1229.12	1082.65	914.326	980.787	811.419	1013.59	733.111	1233.39	1225.29	585.39	668.355	656.79	747.351
AACS	65985	742.515	1900.51	632.065	898.76	1157.17	1353.95	986.177	1172.52	318.976	1132.81	1427.34	745.015	728.576	1129.3	697.648	1372.94	657.737	1450.33	1160.31	689.068	991.457	1503.59	2421.66	1908.16	458.673	701.031	728.271	1902.54	1656.31	844.428	549.338	1879.36	568.776	1006.1	1275.72	582.326
AACSL	729522	0.5444	7.4328	0.9724	0.545	2.0664	3.4364	10.9373	2.0975	0.6242	3.6058	0	0.8485	7.4014	6.2954	1.3503	0	0	0.8909	2.9326	1.4811	0	0	4.6083	4.3967	0	0	1.0456	1.1534	24.7573	0	3.6692	5.814	0	0	1.2346	0
AADAC	13	56.614	34.3053	169.199	789.208	65.091	365.12	553.547	1319.35	0.6242	4319.11	351.453	452.694	1.8504	3738.01	378.08	3.7308	69.3966	3170.16	2077.22	617.976	795.918	376.797	176.267	1.4656	5359.72	1.896	9973.6	1640.14	249.029	851.736	6.8143	522.287	150.501	594.052	1092.18	456.687
AADACL2	344752	0	0	0	0	0	0	0	0	0	0	0	0	0	0	0	0	0	0	0	0	0	0	0	0	0	0	0	0	0	0	0	0	0	0	0	0
AADACL3	126767	0	0	0	0	0	0	0	0	0	0	0	0	0	0	0	0	0	0	0	0.3703	0	0	0	0	0	0	0	0	0	0	0	0	0	0	0	0
AADACL4	343066	0	0	0	0	0	0	0	0	1.2484	0	0	0	0	0.4843	0	0	0	0	0	0	0	0	0	0	0	0	0.5228	0	0	0	0	0	0	0	0	0
AADAT	51166	90.3647	44.5969	88.0029	1.6351	33.0621	123.711	15.1906	143.157	31.8352	41.4663	72.1206	39.4569	33.7689	155.932	134.129	76.7482	209.21	81.9599	27.3705	91.4561	129.568	70.3285	59.3318	23.4489	31.4319	44.555	128.088	65.1672	91.2621	65.7776	32.499	104.651	100.334	6.7549	65.8436	84.2578
AAGAB	79719	1441.48	1173.81	762.368	964.709	1100.87	1141.75	1048.76	792.868	803.371	1109.98	1515.61	923.632	1393.32	1043.58	854.282	1969.34	2116.6	880.178	1000.98	740.535	703.37	1106.78	1197	1263.8	1330.62	1292.57	1227.03	872.549	931.553	862.98	1522.74	1293.6	1006.92	1049.25	1588.89	784.744
AAK1	22848	841.045	921.098	750.699	663.851	1064.7	1005.15	1110.74	687.992	1236.58	830.529	854.683	1042.85	1873.94	1256.66	2496.23	1803.05	279.117	1217.37	1497.56	1013.42	2616.52	1271.05	815.668	1734.73	1419.09	1239.96	901.843	651.672	1057.77	1053.57	1563.62	1701.07	709.178	1367.11	1059.26	985.168
AAMP	14	2464.34	2669.53	2651.27	3506.74	2699.21	1945.88	2645.6	4088.1	2250.94	2620.79	2779.33	2711.07	3088.7	2807.75	2926.52	2066.87	4066.34	2086.86	2666.67	2195.69	2006.64	2843.43	3618.66	3626.77	2555.3	2863.85	3081.43	2724.34	2985.92	3038.14	3146.11	3447.67	2077.37	1990.06	2435.8	2747.1
AANAT	15	1.0887	1.1435	0	0	1.0332	0	0	1.0488	0	0.601	3.7675	0	4.1633	1.4528	0.4501	4.2638	0	0.8909	0.9775	0.3703	0	0	1.1521	3.9082	0	2.8439	1.5684	2.8835	0.4854	0	0.5242	2.907	0	0.3753	0.823	0.9971
AARS	16	3238.98	4552.32	4575.67	3801.06	2504.97	2591.92	2384.93	8955.95	1788.39	2599.76	3481.7	2608.82	4995.03	3615.5	4319.12	3821.95	2876.9	2070.38	3487.29	3618.62	2274.32	2190.45	4620.39	4310.7	5840.51	8612.39	3722.91	4322.95	5699.51	1668.62	2875.11	4265.99	2545.81	2084.62	4106.17	4968.71
AARS2	57505	473.048	795.306	387.991	14918	628.687	544.622	603.98	386.995	745.268	892.308	342.777	513.356	666.534	577.724	529.29	841.528	824.059	400.886	642.214	723.099	785.952	659.651	1107.72	489.976	857.835	283.403	512.77	547.272	569.888	515.522	778.378	1432.58	425.373	402.661	283.502	412.808
AARSD1	80755	611.323	663.236	645.679	508.516	879.762	397.766	1486.86	539.591	815.855	1164.66	1568.35	660.161	693.882	937.046	815.123	542.034	1180.25	580.846	654.448	502.083	540.104	774.127	1081.8	1086.96	828.871	620.927	824.467	723.76	875.243	548.709	871.183	929.748	577.246	410.92	642.798	641.157
AASDH	132949	221.557	144.082	299.502	177.136	119.85	65.2921	109.373	68.6943	280.899	159.856	110.334	263.471	144.327	248.426	205.244	132.178	193.392	265.033	293.255	165.88	275.748	171.971	118.088	62.042	107.101	203.342	219.056	147.636	217.476	208.577	114.271	80.4264	230.638	255.183	121.399	163.031
AASDHPPT	60496	765.923	1077.58	714.234	1334.24	627.664	1352.17	399.21	1092.29	460.674	1070.17	664.693	588.036	1164.8	769.491	2890.51	847.961	505.166	932.739	426.686	990.836	836.26	734.6	849.654	797.753	676.368	1035.19	505.032	579.585	766.99	825.875	531.516	788.275	560.593	1028.24	937.037	836.096
AASS	10157	426.783	425.958	290.75	1276.47	111.585	30.0687	32.8118	359.727	282.772	34.8558	378.364	120.916	106.395	72.6392	239.451	102.864	118.382	274.387	223.363	200.685	222.117	279.261	75.4608	69.8583	1856.81	268.752	300.091	241.061	181.068	233.876	276.242	63.469	151.478	805.329	183.128	626.698
AATF	26574	1522.05	1632.93	1468.82	1613.84	2639.8	963.058	2569.04	1200.84	1840.82	3833.53	2722.82	1076.79	1713.43	1506.54	1872.4	1989.59	2013.01	1362.14	1444.77	1093.4	1221.17	1475.36	2339.29	2108.94	967.404	1541.41	2260.62	2450.98	1515.05	1289.13	2728.87	2299.42	1397.18	736.654	1471.19	2034.65
AATK	9625	98.5302	65.7519	260.605	132.988	170.477	963.565	326.915	51.3896	75.7928	329.688	383.455	677.556	425.581	91.0412	153.483	748.828	251.052	32.0713	373.646	39.6186	46.5116	51.3347	242.512	674.157	65.1921	95.272	46.0071	23.6448	490.665	507.106	407.286	451.066	364.678	345.248	359.259	57.3352
ABAT	18	310.288	323.613	415.218	492.165	358.001	225.945	117.272	2612.48	270.287	327.524	960.172	1200.68	210.94	398.063	635.085	650.761	102.564	589.31	370.968	2535.22	1201.23	326.489	95.6221	446.019	6157.16	479.204	1884.2	1055.36	266.505	816.88	340.716	351.26	792.898	6846.05	928.395	354.481
ABCA10	10349	39.1943	2.8588	61.7479	21.2563	13.9481	1.7182	0.6076	27.7923	59.3009	6.6106	12.9171	5.5155	7.4014	39.7094	13.0528	3.7308	9.6951	9.3541	33.7243	14.4404	32.748	10.7803	4.0323	0.4885	94.2957	9.0058	31.8913	11.534	11.165	10.6818	12.5803	10.1744	2.9318	15.3861	15.2263	0.4986
ABCA1	19	527.447	238.422	926.218	191.852	703.087	235.395	61.3702	502.36	265.918	255.409	217.976	327.106	554.162	300.203	280.405	284.608	259.217	641.376	247.312	1804.29	728.999	269.507	127.304	599.414	2129.16	1047.02	448.569	284.314	318.447	313.709	489.582	476.744	260.907	5555.67	488.045	564.377
ABCA11P	79963	114.3	104.728	85.9609	84.3821	157.174	92.3368	112.508	94.3262	212.172	204.645	67.5404	125.032	96.5005	207.375	170.235	86.0539	58.1452	136.833	200.376	75.3865	144.376	146.453	119.482	36.1944	148.591	48.2285	82.1697	128.893	94.7379	48.653	133.34	94.7287	147.044	124.421	96.2757	111.609
ABCA12	26154	8.1655	33.1618	11.1827	37.6073	245.383	11.1684	0.6076	432.092	0	1.8029	6.4586	8.0611	18.0409	1.937	24.3052	283.009	14.2875	32.9621	39.5894	168.472	43.1894	2.0534	6.9124	1.4656	0	5.6879	1.5684	475.202	657.767	437.955	3.6692	78.0039	10.0985	0	72.8395	17.9484
ABCA13	154664	58.7915	1.1435	4.3758	144.434	1.0332	49.8282	0	2.6219	0	0.601	2.6911	0	0	0	4.501	1.0659	195.433	1.7817	0.4888	4.8135	0.4746	20.0205	0	0	5.8207	0.474	2.0912	1.7301	97.5728	0	0.5242	34.3992	0.3258	0	4.1152	17.4498
ABCA17P	650655	7.6211	10.8634	1.9448	5.4503	2.0664	0.8591	9.722	2.6219	19.975	1.8029	3.2293	11.031	5.0885	3.8741	2.2505	2.6649	1.5308	2.6726	21.5054	2.9621	3.7969	3.0801	0	0	5.8207	8.5318	3.1368	135.525	5.8252	16.8661	1.0484	1.938	21.5001	0.7505	2.0576	1.4957
ABCA2	20	1140.45	1384.79	1656.98	821.365	2143.87	1555.84	2637.1	1437.34	1863.92	2254.21	15703.4	4487.06	4537.06	3524.94	2164.51	4517.49	919.505	3164.37	1331.87	1238.92	1647.84	3853.18	3372.12	1703.47	2165.31	3211.75	1860.67	2327.57	1429.13	3346.79	1068.8	1345.45	4230.31	2047.85	1458.44	1822.76
ABCA3	21	802.94	688.393	410.356	493.255	1252.23	516.323	1286.95	778.186	759.675	628.606	983.315	1073.4	2378.63	1007.26	1724.32	354.428	22.9621	1598.22	1332.36	587.615	2169.44	739.733	726.383	700.537	343.423	2402.65	542.674	790.081	1376.7	1240.78	1113.88	1092.05	1554.2	367.764	1101.65	311.106
ABCA4	24	89.276	4.574	1.9448	3.2702	6.1991	1.7182	6.0763	9.4389	11.236	4.2067	4.3057	23.3347	7.864	25.1816	35.1075	2.6649	86.2355	4.8998	10.2639	59.9833	18.0351	9.2402	8.6406	5.3737	5.8207	2.8439	2.614	4.0369	125.728	26.9857	34.0716	14.0504	3.2576	5.2538	9.8765	4.9857
ABCA5	23461	272.183	156.661	373.891	369.533	274.829	199.313	73.5227	294.179	537.453	154.447	232.508	311.413	211.403	634.867	523.911	147.101	340.349	482.405	315.249	398.778	366.872	306.468	247.12	182.218	1617	405.735	548.425	236.447	611.65	413.781	683.528	555.717	192.524	958.064	259.259	81.7649
ABCA6	23460	370.169	36.5923	78.765	9.2656	45.4604	0.8591	23.0898	471.421	90.5119	22.8365	141.55	46.2452	53.1976	25.6659	50.4107	11.7254	25.0032	75.7238	92.8641	273.628	347.888	9.7536	8.6406	1.4656	239.814	44.555	415.632	147.059	51.4563	28.6723	29.8781	43.6047	10.7501	82.9346	191.769	20.4412
ABCA7	10347	589.548	214.408	904.339	501.976	230.402	150.344	501.899	265.338	4113.61	570.312	434.338	229.953	378.86	410.17	276.809	189.206	2073.73	97.1047	420.332	161.437	255.814	115.503	89.2857	191.988	1016.3	328.001	622.664	224.337	373.786	1252.02	717.075	95.4457	164.508	385.402	213.169	304.624
ABCA8	10351	237.344	30.8748	52.51	1.0901	52.1762	10.3093	12.1525	217.095	32.4594	10.2163	62.9709	25.4561	50.4221	7.7482	67.0643	45.8357	17.3492	30.735	37.6344	159.585	253.916	4.6201	8.0645	0.4885	24.447	33.1793	254.084	57.6701	57.2816	8.9952	20.9671	18.4109	7.1667	24.7678	239.918	4.9857
ABCA9	10350	441.481	32.0183	123.982	26.1616	36.6783	5.1546	10.3296	62.4017	31.8352	7.8125	14.5318	7.2126	39.7826	33.414	22.0547	6.3957	26.534	40.98	68.915	42.2105	137.162	2.0534	4.6083	0	183.935	59.7227	121.291	46.1361	5.8252	7.8708	12.5803	19.3798	8.4697	21.7656	83.9506	9.9713
ABCB10	23456	331.519	570.04	332.563	939.638	494.382	321.306	235.151	701.626	302.747	173.077	400.969	1154.01	771.135	595.642	450.996	1108.05	499.043	468.597	866.08	515.412	766.493	426.591	368.664	416.707	1010.48	475.886	625.278	444.637	513.107	908.519	652.601	747.093	770.421	764.8	904.938	433.753
ABCB11	8647	3.8106	1.7153	3.8896	1.6351	1.0332	0	0	181.961	11.8602	2.4038	26.9107	6.7883	6.0136	0	3.6008	3.7308	1.5308	1.7817	1.4663	156.253	66.4452	0.5133	0	0	296.857	2.3699	76.8527	17.8777	0.4854	8.433	0.5242	25.6783	0.6515	9.757	30.8642	4.4871
ABCB1	5243	553.62	11992.6	220.737	4093.75	5197.47	2018.04	1808.29	1143.68	180.399	212.139	2818.62	4.2427	9342.43	35.3511	933.948	15.9892	6.6335	126.949	83.5777	330.649	290.935	67.7618	2902.07	9.2819	80.326	3283.33	764.867	2118.8	1176.7	6.7464	10100.4	135.659	38.7654	720.518	410.7	369.936
ABCB4	5244	51.1704	133.219	33.5481	31.6119	60.9583	19.7595	19.444	1062.4	367.041	88.3413	324.004	2.1213	49.0343	3.3898	12.1526	4.2638	45.9242	5.7906	8.7977	387.67	316.089	3.5934	38.5945	1.4656	3144.35	23.6995	805.646	313.149	7.767	3.3732	358.013	136.628	1.9546	22.1409	182.304	27.4212
ABCB5	340273	1.6331	4.574	0	30.5219	2.0664	7.732	0	7.8658	1.8727	1.2019	0.5382	11.031	2.7755	0	0	1.5989	0	0.8909	5.8651	3.3324	1.8984	6.1602	0	3.4196	0	14.6937	0	0	0	3.3732	0	3.876	0.6515	0.3753	10.6996	1.4957
ABCB6	10058	408.721	275.049	312.245	1108.15	481.152	247.758	561.981	712.166	328.764	488.401	913.192	450.39	531.236	667.748	438.699	173.062	3382.33	454.138	924.071	465.149	429.578	606.484	448.629	1618.38	699.534	786.378	557.752	529.383	1155.53	576.173	1026.74	799.283	476.899	259.991	632.3	445.704
ABCB7	22	451.279	429.388	487.176	398.419	420.509	353.093	295.306	251.704	534.956	142.428	355.759	314.807	464.438	296.852	154.383	571.348	443.424	480.178	321.114	308.433	404.366	559.548	344.47	288.227	329.453	457.874	347.667	263.553	317.476	423.9	334.425	553.295	271.683	845.858	259.259	332.544
ABCB8	11194	680.457	766.152	461.894	352.092	643.678	731.1	878.019	959.622	855.805	1067.91	1213.67	700.891	491.731	608.717	684.145	989.732	885.827	638.307	791.789	866.426	638.348	926.591	713.71	1487.05	2252.62	541.77	667.625	695.502	622.33	791.018	860.7	1157.95	588.322	1050	916.461	668.079
ABCB9	23457	718.41	120.006	81.3662	117.624	103.288	44.7251	63.8918	76.7121	196.685	90.2644	198.633	116.067	66.2195	133.269	142.64	188.326	69.4936	293.724	163.24	58.3468	73.8348	207.767	63.1567	189.536	81.1409	101.709	58.6067	110.433	305.898	138.184	158.165	981.817	71.8756	136.662	388.675	111.829
ABCC10	89845	695.699	557.461	685.548	2245.54	610.616	664.089	303.205	424.226	651.685	711.538	349.3	654.221	552.33	565.133	522.561	511.122	1060.85	457.906	772.727	677.219	495.491	629.363	754.032	695.164	670.547	433.701	474.186	405.998	660.68	407.596	547.766	928.779	424.79	610.189	399.177	686.028
ABCC11	85320	1.6331	2.287	1.4586	4.9053	1.0332	0.8591	0	10.4877	0.6242	52.2837	8.0732	7.6368	3.2381	7.7482	3.6008	10.1265	5.613	1.7817	3.4213	8.1459	8.0683	0.5133	5.1843	4.3967	416.764	1.422	10.4561	7.4971	4.3689	1.1244	3.6692	8.7209	15.9622	15.0108	7.8189	1.9943
ABCC12	94160	0	0	0.4862	3.8152	0	0	0	0	0	0	0	0	0	0	0	0.533	0	0	0	0	0	0	0	0	1.1641	0	1.0456	0	0	1.1244	1.0484	0.969	0	0	0	0
ABCC13	150000	0.5444	0	0	1.6351	0	0	0	0	0	0	0	0	0.4626	0	3.1507	1.0659	0	0	0.4888	0	0	0	0	0	0	0	0	0	0	0	0	0	0	0	0.823	0
ABCC1	4363	1335.87	1312.75	2550.63	347.731	2802.01	973.368	490.962	1551.65	1782.77	892.428	1756.19	4598.22	4096.68	476.029	1248.57	2234.76	2767.19	1850.33	1192.57	2180.88	1836.73	1607.8	1356.57	1228.14	167.637	1846.19	947.327	724.337	1898.54	3794.3	1428.91	1290.7	1184.46	497.608	1721.4	1902.03
ABCC2	1244	19.0528	12.0069	1.4586	1187.63	1008.91	226.804	4.861	556.896	29.3383	131.611	364.37	19.9406	138.776	134.14	650.388	3.7308	4491.39	145.212	502.933	510.599	336.972	15.9138	61.0599	2349.78	1483.12	17.0636	537.446	142.445	1592.72	20.2393	1485.52	1427.81	13.6819	296.838	113.992	30.9111
ABCC3	8714	2399.56	13880.5	10014.3	4101.92	10939.9	18058.4	9037.82	13560	1629.84	10088.9	17928.4	11501.1	9859.14	10530.3	5910.66	15643.8	11132.5	11565.3	6282.99	4303.62	9586.14	7848.05	11474.7	6333.17	5927.82	11956.4	9219.19	10917.5	15884	10995	25926.9	14497.6	5753.56	14888.8	5721.4	2573.6
ABCC4	10257	419.162	929.102	148.778	425.671	2409.92	1798.97	1654.56	804.929	200.999	505.409	814.855	886.296	656.875	1322.03	519.861	559.09	265.85	909.577	921.799	2451.91	1606.08	347.536	1165.32	1182.71	192.084	1112.93	610.639	1594.58	1660.68	721.305	1989.25	2417.15	1301.41	262.313	437.449	643.649
ABCC5	10057	1258.03	328.759	1306.43	513.966	716.001	381.443	425.946	585.737	658.552	1113.58	847.148	981.332	740.141	523.971	1022.62	630.508	1207.81	723.385	1805.47	1059.71	1112.96	637.577	504.032	1059.11	395.809	536.557	574.565	666.09	558.252	1203.11	338.095	455.426	520.889	2193.08	636.625	421.289
ABCC6	368	38.1056	581.475	33.5481	914.021	143.097	241.409	396.78	699.004	4.9938	1021.03	344.995	410.692	2065.92	389.346	226.398	425.846	63.2734	703.341	366.08	781.264	682.487	317.762	2601.38	684.905	1521.54	118.023	1140.24	1445.21	650.485	262.548	1139.56	776.163	322.502	940.051	279.835	109.186
ABCC6P1	653190	5.988	94.9114	1.4586	75.2146	30.4791	22.3368	38.888	80.7551	1.8727	263.221	27.4489	60.2461	162.369	107.506	9.452	31.9784	16.3286	100.668	62.5611	115.153	53.1561	29.7741	251.152	44.9438	309.662	32.7053	105.084	336.793	67.9612	35.9809	76.0058	45.0581	30.9471	79.5572	34.1564	9.4728
ABCC6P2	730013	28.8514	127.501	4.862	164.055	20.1472	134.88	70.4846	38.8044	0	293.87	66.2002	135.341	85.1162	145.763	53.5614	143.37	11.7362	93.5412	79.1789	44.4321	63.1229	83.6756	187.788	151.441	497.09	37.4452	104.039	219.147	57.767	82.6437	230.114	65.407	108.804	140.726	43.6214	7.4785
ABCC8	6833	2.1775	0.5718	1243.22	0.545	0	30.0687	1.8229	0	3.1211	0.601	174.919	4.6669	0.9252	68.7651	8.5518	6.3957	1.0205	67.2606	1.4663	0.3703	0.4746	56.9815	1.1521	13.6786	3.4924	0.474	6.7965	0.5767	8.7379	1.1244	3.1451	4.3605	1.303	196.266	77.7778	0.9971
ABCC9	10060	345.672	37.1641	124.468	19.0762	43.394	24.055	28.5584	212.375	41.8227	12.0192	69.4295	305.473	70.776	7.7482	66.6142	23.4508	31.1264	102.004	118.768	246.598	214.523	9.2402	13.2488	13.19	90.8033	32.7053	145.34	94.579	38.835	35.9809	42.9826	54.2636	69.061	13.5097	230.453	1635.8
ABCD1	215	436.581	221.269	374.377	1424.17	566.705	191.581	506.152	260.619	459.426	380.409	333.692	633.432	596.739	1883.78	746.259	704.058	360.76	735.857	503.91	687.587	504.034	572.382	621.544	1791.4	1263.1	558.36	742.387	224.913	778.155	611.676	714.978	938.469	429.351	385.027	435.803	396.361
ABCD2	225	19.5972	4.0023	8.2655	10.9007	25.8298	1.7182	1.8229	6.817	65.5431	0.601	0	1.2728	40.7078	0	7.2015	6.3957	0	4.4543	16.6178	5.1837	14.2383	0	1.7281	0	1.1641	1.896	31.8913	6.3437	1.4563	25.8613	1.5725	1.4535	0.6515	3.0022	14.4033	13.9599
ABCD3	5825	823.081	2974.27	1041.94	857.883	1350.9	2439	1397.54	2235.45	416.355	1237.38	1372.44	1406.45	2106.16	2130.27	739.507	1312.18	1026.15	2401.78	1598.24	3171.34	1638.82	2231.01	890.553	664.875	1663.56	767.389	1858.58	3225.49	1993.69	1262.14	2499.28	1781.49	1082.5	3039.68	1936.63	1140.72
ABCD4	5826	797.496	716.409	896.074	711.814	589.436	780.069	625.247	496.067	1382.65	1186.3	555.436	670.768	464.438	507.99	357.376	930.039	702.13	497.55	570.87	778.302	840.057	416.838	872.696	631.168	465.658	280.128	748.138	1015.57	748.544	722.992	515.267	724.806	361.919	469.462	449.794	532.968
ABCE1	6059	1238.43	1012.58	1489.73	1147.3	950.536	709.622	590.005	1705.82	1007.49	1016.23	1027.99	1437.84	1138.43	864.891	1381.79	1043.03	1575.71	1333.63	1532.75	1068.96	1344.57	961.499	588.134	485.1	483.12	920.014	894.001	1291.23	1249.03	1564.05	731.228	846.899	1186.42	1176.1	921.399	2455.94
ABCF1	23	2861.73	2081.19	1792.15	1513.56	1898.49	1833.33	2355.16	1661.77	2318.98	2173.68	1048.44	2523.97	2281.48	2263.44	1804.43	1735.9	2399.8	2127.39	2434.02	2834.03	1950.17	3240.76	4286.87	2005.37	2110.59	1277.88	2375.64	1607.27	2045.63	2316.27	3200.63	2316.86	1412.17	1975.42	1299.59	2209.15
ABCF2	10061	1216.66	863.351	777.926	969.614	1479.53	704.467	1104.06	1031.46	1335.83	1618.99	2265.34	1023.76	790.101	799.516	1107.69	1174.67	1715.52	1265.48	1465.79	1254.84	1009.02	1471.77	701.037	1404.49	1067.52	1333.33	1225.46	830.45	957.767	1180.62	1539.51	1341.09	840.459	954.311	1565.02	2025.18
ABCF3	55324	1618.94	1444.25	1111.46	1249.76	1360.71	1058.42	1448.58	1072.89	1580.52	1819.71	1060.82	1032.24	1200.42	554.964	1082.93	1451.29	1416	1172.38	1313.29	1211.89	1021.36	1371.66	1627.3	1565.22	1473.81	1834.81	1148.61	1281.43	782.039	947.31	771.59	1553.78	1067.19	1065.39	1455.14	1438.86
ABCG1	9619	430.593	563.751	1257.32	351.546	417.409	457.904	139.754	343.471	569.288	182.692	157.696	296.563	302.533	498.789	227.298	241.437	263.299	134.076	189.638	813.107	317.988	463.039	1010.94	1242.79	145.518	555.516	287.021	150.519	712.621	277.728	204.429	201.066	389.934	1111.17	265.021	466.658
ABCG2	9429	146.979	64.6083	59.8031	179.316	50.1098	140.034	37.0652	286.838	79.2759	11.4183	55.9742	20.7891	49.0343	26.6344	56.262	22.9179	13.267	62.3608	44.477	177.358	112.008	27.2074	74.8848	21.4949	77.9977	23.6995	250.425	96.3091	27.1845	44.414	123.182	39.2442	32.5759	162.117	95.8848	47.8624
ABCG4	64137	9.2542	2.8588	2.431	5.4503	0	0.8591	3.6458	5.7682	2.4969	1.2019	2.1529	0.8485	0.9252	1.4528	1.3503	3.1978	1.5308	2.6726	5.3763	4.8135	3.3223	1.0267	0.576	2.4426	1.1641	0.948	2.0912	2.3068	7.2816	3.3732	1.5725	4.845	2.6061	2.6269	1.6461	1.9943
ABCG5	64240	3.8106	5.1458	1.4586	1.6351	4.6494	45.5326	58.9397	328.789	0	39.0625	96.8784	1.2728	0.4626	12.1065	5.4011	4.7968	37.2496	3.118	122.678	166.991	116.754	3.0801	14.4009	0.4885	800.931	0.474	407.267	88.2353	16.9903	6.1842	4.1934	50.8721	3.9091	499.484	88.0658	17.4498
ABCG8	64241	8.1655	3.4305	0	1.0901	4.1328	85.0515	47.3948	380.178	0	15.024	73.197	0.8485	0	2.9056	0.4501	7.9946	6.6335	2.2272	90.4203	216.977	100.617	0	1.1521	2.4426	877.765	0	359.692	103.806	18.932	5.0598	0	74.6124	2.6061	1308.94	87.2428	21.9369
ABHD10	55347	468.699	714.122	532.88	1756.1	347.669	261.168	837.308	445.202	998.127	911.058	527.449	339.414	551.405	229.056	434.792	505.259	1223.12	396.437	618.768	319.541	441.386	628.337	343.894	539.814	1614.67	384.406	656.123	772.203	226.699	460.443	187.131	476.744	334.881	698.002	281.893	617.724
ABHD11	83451	820.904	1173.24	1201.41	1572.97	748.03	2278.35	2521.65	1018.88	395.755	1644.83	927.341	550.276	452.411	1087.65	736.807	514.853	1548.16	631.626	731.183	555.031	672.046	1159.14	1645.16	1197.85	466.822	840.384	799.373	1294.12	619.903	473.936	794.129	824.128	1359.72	288.958	1213.17	574.847
ABHD12	26090	1671.2	2763.29	1568.98	1410	1101.9	2063.57	2948.2	2101.21	1233.46	2553.49	2484.93	1264.32	1363.25	2374.33	2000.68	1485.93	1485.39	1569.27	1608.5	1630.66	927.385	4016.43	3042.63	3295.07	2818.39	1984.6	1637.43	1933.1	1894.17	1189.62	1244.92	1516.96	3400.93	1740.13	1985.6	2036.64
ABHD12B	145447	0	0.5718	0.9724	460.553	2.0664	0	0	0.5244	0	0	1.0764	0.8485	0.4626	0	0.9002	0.533	12.7567	2.2272	0.4888	4.4432	0	1.0267	0	1.9541	5.8207	2.3699	0	0	0.4854	1.1244	0.5242	2.4225	1.9546	0.3753	1.2346	0
ABHD13	84945	516.603	325.329	676.31	452.378	317.706	443.299	217.53	371.264	475.655	237.981	139.935	515.062	237.77	403.874	202.993	276.08	498.533	269.933	1161.29	641.674	299.952	226.386	207.373	162.677	473.807	382.036	325.709	368.512	484.952	399.726	388.94	255.814	427.396	708.885	333.333	333.043
ABHD14A	25864	313.01	152.659	313.31	135.337	135.865	233.677	507.361	142.108	642.946	454.928	141.55	272.134	178.096	219.37	125.577	197.733	266.034	114.543	178.397	137.369	166.588	255.647	263.825	210.064	256.112	123.237	359.692	371.315	148.544	144.632	165.116	181.25	258.347	160.24	124.321	279.696
ABHD14B	84836	1322.26	1836.48	1639.97	2163.78	1527.57	978.522	3206.44	1923.96	4702.25	2324.52	1079.12	2222.74	1184.69	1900.24	1709.01	1596.79	1417.02	907.35	887.097	1129.32	1499.29	881.417	2511.52	1310.21	2429.57	1317.69	2391.84	4080.74	1216.99	805.073	1634.39	2314.44	2034.69	1353.97	1148.97	1015.58
ABHD15	116236	299.401	506.575	470.159	750.511	390.03	439.863	150.083	416.361	643.571	111.779	538.751	101.4	389.962	373.85	383.481	296.866	423.013	213.809	247.801	148.477	221.642	140.144	370.392	215.437	470.314	608.129	383.218	175.317	445.146	269.295	451.317	599.322	143.334	657.848	427.161	325.564
ABHD1	84696	10.343	0.5718	3.4034	1.6351	2.583	0	0.6076	5.7682	24.3446	20.4327	3.2293	15.2737	1.8504	36.3196	24.3052	16.5222	11.7362	7.1269	11.7302	4.0729	22.7812	1.0267	2.3041	6.3508	6.9849	4.2659	28.2316	20.7612	10.1942	9.5574	5.2418	12.5969	7.8182	8.6312	4.5267	1.4957
ABHD2	11057	5260.75	13519.2	15662.6	2640.14	18095.3	28978.5	2446.91	12844.3	922.597	2930.29	7434.34	2723.8	19380.6	4264.89	7634.07	7640.71	14246.7	6515.37	2582.6	4638.34	8707.17	2881.42	5278.23	9669.27	17315.5	4821.9	4192.92	6278.55	5382.04	6305.1	6788.1	6698.16	4376.9	14574.7	6245.27	4540.94
ABHD3	171586	411.541	1467.12	906.284	812.645	1254.29	5048.11	777.153	1516.52	504.994	4358.77	2578.58	562.58	2045.1	4734.14	1966.02	894.33	999.107	1546.55	1420.33	2435.62	2751.31	1149.38	975.807	3701.03	1164.14	675.909	1503.59	1565.74	1969.9	983.291	961.866	804.264	2722.7	1740.5	1900.82	549.919
ABHD4	63874	1218.29	443.11	1099.79	1731.03	1184.55	646.907	452.074	839.538	460.05	1750	879.44	892.66	1194.4	943.341	653.089	650.228	1098.1	1563.92	1062.07	1297.05	1035.6	1836.76	222.926	988.275	811.409	1463.21	868.906	1346.02	1030.58	705.564	1212.42	1092.05	1416.73	1174.22	674.074	612.24
ABHD5	51099	390.855	240.137	468.214	228.914	463.386	264.605	192.01	359.727	157.303	253.606	258.342	601.188	218.342	310.896	399.235	283.009	211.762	302.895	404.203	415.44	372.568	263.347	202.765	334.147	260.768	200.972	384.786	310.842	462.136	705.001	338.619	246.124	364.199	1125.81	451.852	572.853
ABHD6	57406	110.506	45.1687	196.913	247.99	50.6264	18.0412	27.9508	218.668	285.268	36.6587	311.087	20.3649	75.8645	22.276	59.4126	20.253	38.2702	38.3073	45.9433	166.62	125.297	21.5606	24.7696	76.6976	108.265	72.9944	297.478	100.923	40.2913	25.8613	44.5551	85.2713	70.364	1541.61	104.527	196.435
ABHD8	79575	292.324	328.188	362.222	240.905	281.545	150.344	217.53	275.826	591.76	934.495	497.309	192.194	316.873	375.787	305.615	157.76	100.013	320.713	248.289	159.215	306.122	328.029	529.378	435.76	621.653	411.423	447.523	642.445	404.369	142.799	220.155	306.686	248.554	340.745	306.584	403.839
ABI1	10006	1535.72	2156.92	1126.37	958.169	1620.18	1873.71	729.759	1443.35	1630.89	1632.94	1324.47	2251.61	1861.63	2424.5	1591.29	1615.96	804.694	2160.73	1559.23	2422.2	3285.93	1249.83	1010.1	1597.74	1133.33	1527.2	1317.88	1578.12	1253.73	1582.51	1052.75	1204.44	3472.48	1559.82	2191.7	1515.79
ABI2	10152	1088.19	2528.3	1003.04	598.447	1750.74	1039.52	783.837	2595.7	631.086	1179.69	1101.72	2303.35	1775.88	1834.87	1280.97	2436.76	1152.7	1524.28	1191.1	1335.93	1555.77	1405.54	1920.51	1023.94	251.455	1564.64	1138.67	1558.25	1654.85	1975.02	1649.59	1218.02	1172.08	1110.05	1560.91	1360.59
ABI3	51225	400.653	237.278	333.05	215.833	432.907	131.443	390.096	221.814	2471.91	62.5	230.355	65.3373	324.274	70.2179	159.334	106.595	41.8421	198.218	248.778	171.064	188.42	233.573	347.35	154.861	80.326	242.683	290.158	159.17	109.223	143.924	172.979	103.682	57.3337	152.359	209.054	423.782
ABI3BP	25890	597.714	152.659	439.528	71.3994	237.634	25.7732	86.2828	84.9502	651.685	9.6154	15.6082	19.5163	355.73	9.201	230.899	23.9838	32.147	156.347	282.502	37.397	761.747	116.53	3.4562	4.3967	30.2678	257.851	363.874	1338.52	65.0485	77.5839	82.2959	29.0698	93.1672	15.7613	702.058	1774.9
ABL1	25	1767.01	2002.86	2036.22	1812.78	1782.25	1496.56	1083.4	1419.51	1500	1585.34	1521.53	2191.34	2212.1	1606.78	1159	2587.05	2575.33	2850.33	1659.82	2214.2	2245.85	3378.34	1805.3	940.889	1201.4	1893.59	1033.07	957.901	1347.09	1817.04	1328.27	1122.58	2217.44	1541.98	1191.36	2325.81
ABL2	27	931.954	640.366	554.759	616.433	723.75	928.694	492.177	751.442	533.708	788.462	497.847	2171.4	1133.8	809.685	1127.94	1254.09	910.831	1132.29	1527.37	1068.96	1332.7	788.501	331.221	481.192	328.289	1079.27	861.064	452.134	1029.13	1535.37	1071.42	806.686	1582.54	713.013	1388.89	1585.94
ABLIM1	3983	2719.11	6771.3	3156.44	3150.29	6309.18	14707	5107.09	6895.12	3275.28	3903.85	5703.44	8131.52	3741.41	4714.29	6657.36	2475.13	7102.44	2314.03	1481.43	925.298	5657.33	3594.97	6688.94	5629.7	2067.52	7020.74	4369.1	7752.02	4359.71	1910.92	3169.18	4332.85	4546.3	22824.3	3375.31	1084.88
ABLIM2	84448	402.831	280.16	287.833	22.8914	1403.07	114.261	307.459	272.155	56.1798	64.9038	83.423	201.527	985.313	509.443	965.905	163.623	288.302	269.933	511.73	44.0618	146.179	603.183	207.373	208.109	101.281	1814.91	166.776	71.511	21.3592	208.015	203.905	607.074	699.731	226.663	465.432	322.074
ABLIM3	22885	1121.94	369.926	1424.09	207.658	1450.6	1880.58	2487.01	1640.27	481.273	516.226	1714.21	1854.48	427.894	3943.34	5140.54	1856.88	119.403	5747.88	1160.31	1442.93	1369.25	1849.08	487.327	1341.96	9044.24	2003.55	1734.15	926.759	2941.75	1334.67	722.841	1258.24	1445.39	2215.97	2227.57	2289.92
ABO	28	21.7746	0	71.9582	99.1961	5.6826	0	0.6076	2.0975	10.6117	10.2163	0	128.977	1.8504	0.4843	4.501	0	244.419	0.4454	43.9883	72.2022	1.4238	1.54	0	0	4.6566	6.1619	3.1368	0	0	2.811	1.0484	0.969	0	193.264	4.5267	0.4986
ABP1	26	861.187	23.442	136.623	1545.71	6.1991	1.7182	0.6076	19.4022	211.611	7.2115	8.0732	1.2728	7.4014	2.9056	7.6516	1.0659	1347.62	5.7906	7.3314	75.1643	35.5956	31.8275	9.2166	2.4426	0	4.2659	51.2351	16.1476	9.7087	8.433	807.234	9.6899	0.3258	3.3774	835.391	10.9685
ABR	29	2530.76	2609.49	2797.13	1229.6	1781.22	2329.9	2114.54	1092.82	2405.74	4205.53	2393.43	1354.69	1284.14	2622.28	2852.26	3483.52	1857.38	3857.02	2901.76	886.791	2780.73	2808.01	2101.38	1007.33	566.938	2329.66	2398.12	1430.8	2802.91	3154.52	3562.31	3499.03	3314.93	1163.34	2283.13	3659.48
ABRA	137735	0	0	0	0.545	1.0332	0	1.2153	0	1.2484	0	0	0.4243	0	0.9685	0	0	0	1.3363	1.4663	0.3703	0	0	0	0	2.3283	0.474	0.5228	0	1.9417	0	0.5242	0.4845	1.6288	1.5011	0	0
ABT1	29777	833.424	638.079	464.325	536.313	578.587	673.539	1034.79	651.809	1417.6	760.817	356.835	774.289	793.801	647.942	602.228	552.694	887.358	445.88	723.363	802.74	651.637	943.019	1220.05	742.062	962.747	374.452	763.822	728.95	582.524	572.884	678.81	814.438	518.935	581.293	391.769	656.612
ABTB1	80325	964.072	586.621	1459.58	607.712	921.09	756.873	1338.6	411.117	2536.2	901.442	662.002	602.885	832.659	589.346	810.622	333.642	470.978	746.102	1021.02	340.646	452.302	1570.84	581.797	635.076	819.558	865.505	872.043	554.787	537.864	823.626	530.992	573.643	639.792	1013.98	480.247	674.561
ABTB2	25841	710.397	157.233	298.043	212.563	112.101	698.454	110.588	233.351	187.266	31.851	252.96	516.759	75.8645	151.574	374.93	271.817	75.0096	469.488	387.097	192.909	147.603	202.259	198.157	482.169	527.357	464.036	197.621	108.996	416.99	283.912	344.909	156.492	601.678	185.383	614.403	118.16
ACAA1	30	1041.92	1487.14	1935.09	1433.44	1088.47	1100.52	1523.93	2660.72	1896.38	1428.49	1412.81	1078.49	877.992	1007.75	646.337	813.851	753.668	544.321	824.536	2486.72	1580.92	868.583	2051.84	1898.39	2282.89	672.117	3449.48	2012.69	872.816	1140.71	707.116	1389.05	1584.82	4335.49	1321.81	1305.25
ACAA2	10449	883.506	2526.59	2162.64	3099.06	1739.38	1994.85	3578.92	3702.67	860.175	3091.95	3702.37	549.427	3466.17	4584.02	2658.26	1798.79	644.98	2056.57	2013.2	1853.93	2383.96	3309.55	3407.83	3589.64	10328.3	3081.88	4584.5	3657.44	2982.04	1564.61	2195.78	1039.73	2549.39	8815.09	2199.59	1909.01
ACACA	31	795.318	550.029	687.006	645.865	2338.11	299.828	316.573	614.578	326.467	1168.87	2994.62	1147.65	1492.31	864.407	1101.38	899.66	1766.04	670.379	1892.96	1225.59	672.52	604.209	979.263	1781.63	779.977	907.691	838.06	539.216	1306.8	686.449	984.406	1144.38	826.452	1659.07	1165.84	1361.59
ACACB	32	617.855	1082.33	280.053	446.382	391.579	218.213	1289.99	468.275	599.875	806.49	1031.22	606.703	942.755	963.196	432.542	1291.4	209.721	994.209	625.611	558.734	837.684	602.156	1668.2	445.041	3779.98	469.724	853.222	977.509	634.952	381.173	450.793	1740.79	339.767	1399.76	413.992	227.346
ACAD10	80724	538.378	1182.39	417.649	1932.14	779.026	379.725	939.389	1018.88	920.724	1334.13	1637.78	503.182	880.305	1135.11	441.994	1814.24	828.167	1047.66	624.145	786.448	651.163	889.63	1366.94	1194.43	1934.81	409.053	705.79	1185.7	1072.82	472.812	757.961	1765.02	387.002	1111.55	866.667	628.692
ACAD11	84129	442.531	536.844	498.359	555.934	457.704	268.9	191.402	825.878	905.119	385.817	564.575	331.353	631.895	219.855	341.974	682.206	945.514	513.14	508.675	418.032	467.489	395.277	364.631	614.558	1078	625.098	968.757	1423.88	387.723	426.711	136.81	654.515	313.055	929.858	337.037	365.893
ACAD8	27034	477.953	603.202	541.145	234.364	440.656	345.361	296.521	418.458	463.171	411.058	324.004	501.485	589.8	319.128	293.012	490.336	325.552	391.537	448.68	310.284	427.622	418.891	637.673	661.944	891.735	511.435	393.674	342.561	442.718	416.029	307.168	259.205	409.48	750.539	462.14	459.18
ACAD9	28976	980.942	1184.67	721.04	1188.71	1330.23	1063.57	1695.15	1076.04	868.883	1456.53	991.249	775.134	1144.44	554.479	1222.16	1008.38	1313.68	804.005	1336.38	694.988	519.217	1009.42	929.723	1318.02	1605.36	791.084	884.857	1087.09	717.952	870.075	521.033	1314.92	915.775	1039.48	630.029	1154.98
ACADL	33	17.9641	20.0114	33.0619	2.7252	16.5311	11.1684	2.4305	127.95	0	14.4231	105.49	129.402	18.0409	237.288	1.3503	110.859	7.654	15.5902	4.3988	64.4265	34.6464	4.1068	24.1935	1.4656	406.286	105.226	106.13	142.445	7.2816	23.0503	201.284	110.95	47.2351	118.96	47.7366	23.4326
ACADM	34	478.498	1607.2	716.665	3359.04	767.144	642.612	631.931	1520.19	679.775	636.418	895.048	1151.46	1555.22	1021.79	1343.09	1051.56	375.558	1585.3	1906.65	1155.6	1480.78	944.045	1448.16	1051.29	1860.3	679.701	1618.61	2298.73	383.01	1231.22	1698.34	2868.7	470.071	2312.41	1504.53	1018.57
ACADS	35	647.795	1899.37	519.752	2055.32	601.834	868.557	3127.45	1316.73	659.176	1864.18	1569.43	481.12	1044.99	1023.24	559.469	960.419	293.915	1281.07	453.568	974.544	886.094	1501.54	3975.23	1705.42	1826.54	980.685	1537.58	2614.19	927.184	694.319	375.835	1596.9	422.184	1072.52	524.691	519.506
ACADSB	36	505.171	387.078	337.426	1508.65	247.449	262.887	182.895	2181.96	501.873	301.082	1105.49	1296.56	281.254	853.269	1006.41	457.291	495.982	719.822	409.58	1541.79	1648.32	510.267	395.737	374.206	2217.7	481.574	2062.48	1919.26	555.825	637.537	447.124	523.74	512.745	1929.64	942.798	218.871
ACADVL	37	4689.71	11145.8	5916.12	7014.02	3701.92	7798.1	14072	9896.17	7677.27	8662.25	9423.04	6343.65	4508.38	15147.2	8685.04	9187.9	8952.67	6165.69	9701.83	15128.8	8232.55	16542.1	16995.4	7344.89	8250.26	4152.15	13310.7	18938.9	10885.9	6972.99	6716.27	12406	8359.3	20913.4	11353.1	4992.15
ACAN	176	149.701	52.0297	17.9895	349.911	72.84	0	144.615	58.731	15.6055	11.4183	11.3025	182.011	30.9934	85.7143	198.042	79.4131	28.5751	303.786	229.716	158.845	59.3261	13.8604	71.4286	226.185	1.1641	46.451	52.8036	122.261	311.165	886.03	14.1528	243.702	1049.92	162.117	163.786	42.3782
ACAP1	9744	543.277	168.668	115.23	167.325	407.594	67.0103	170.743	94.3891	10638.6	72.1154	44.6717	32.6686	403.839	21.3075	112.524	81.545	148.999	115.813	194.526	64.0563	394.874	114.476	71.4286	46.4094	6.9849	123.711	654.555	72.0877	49.5146	23.6125	47.176	18.4109	7.8182	8.2559	398.765	335.037
ACAP2	23527	1399.56	577.473	1093.96	1971.39	699.471	656.357	235.759	844.782	1300.87	408.654	691.066	745.863	825.257	380.63	868.235	780.807	1405.28	847.216	970.186	719.8	884.67	522.074	366.359	437.225	1132.71	1228.58	631.551	604.96	477.67	965.863	432.447	662.791	691.913	1152.08	670.782	735.884
ACAP3	116983	702.341	807.37	885.455	892.394	748.082	603.093	508.583	1039.48	1503.12	599.249	786.453	668.647	699.063	2002.42	499.606	353.362	737.905	632.071	978.851	1774.16	430.945	745.38	873.318	740.132	1490.1	534.234	473.763	395.04	688.024	624.089	401.662	440.921	653.545	1482.53	547.379	611.243
ACAT1	38	632.553	2556.32	599.976	685.652	596.668	776.632	1589.55	2805.98	565.543	966.346	2256.73	1538.82	2059.91	853.269	2147.41	1772.14	418.931	1777.28	731.183	2250.12	2183.2	2002.05	7303.57	5363.46	6000	2836.83	4019.34	2903.11	839.32	1704.6	198.663	1956.88	1119.31	3879.16	1667.49	1259.38
ACAT2	39	335.705	492.373	354.409	487.293	796.074	136.701	180.811	596.172	485.275	208.419	522.74	291.018	452.615	220.397	389.535	323.536	787.019	210.45	663.68	336.062	276.255	127.238	450.887	436.747	1286.16	176.135	748.89	299.729	287.743	318.813	300.202	323.6	167.655	927.975	379.695	1657.85
ACBD3	64746	1325.53	1299.6	1682.75	1623.11	1399.46	1255.15	718.821	1503.41	465.044	685.697	1089.88	3402.21	1806.87	1497.82	1408.8	3912.03	2325.3	1668.15	1664.71	2220.86	1880.4	971.766	655.53	719.101	2103.61	1664.18	1369.23	1204.15	1396.12	2862.73	1525.36	2492.73	2806.42	1103.67	2948.56	1157.67
ACBD4	79777	295.046	624.928	369.515	354.272	400.878	794.673	1364.73	812.271	1220.97	1259.01	1541.44	392.872	668.44	1197.09	579.723	613.453	287.281	430.289	464.809	345.83	934.979	580.082	1166.47	926.234	895.227	579.689	931.643	1396.19	788.35	495.862	548.29	674.419	283.085	706.633	423.868	195.937
ACBD5	91452	730.539	1550.6	917.467	864.968	1363.3	1271.48	465.441	1694.28	351.436	1226.56	893.434	993.212	2148.72	1294.43	1807.58	1517.91	667.942	1766.15	1449.17	1104.88	1164.21	670.945	853.111	1374.21	2088.47	1460.84	1062.34	1136.68	1483.01	1067.62	1080.85	1042.64	1453.54	880.758	1185.19	860.027
ACBD6	84320	599.347	654.088	456.059	467.094	565.156	428.694	695.124	444.153	488.764	780.649	644.241	1302.08	803.053	856.174	561.269	992.93	763.363	736.303	890.518	357.308	578.548	1119.1	565.092	799.707	358.557	846.072	960.397	587.659	644.175	906.832	486.961	513.081	1238.86	368.14	631.276	441.231
ACBD7	414149	43.0049	17.1527	15.0723	32.157	26.3464	2.5773	13.3678	3.6707	10.6117	450.721	22.605	17.395	6.9388	120.097	64.8138	19.72	29.5956	58.7973	37.6344	5.1837	25.1542	65.1951	7.4885	26.8686	46.5658	38.3932	88.8773	58.8235	39.3204	11.8062	4.1934	21.3178	10.4243	29.6463	16.8724	30.9111
ACCN1	40	5.4437	0	0	0	1.0332	1.7182	1.2153	2.6219	0.6242	1.2019	4.3057	0.4243	0.4626	0.9685	0.4501	0	2.5513	2.2272	0	6.2945	1.4238	0	0	0	2.3283	0.474	3.6597	2.3068	0.4854	1.6866	1.0484	2.4225	0.3258	0	0.823	3.49
ACCN2	41	70.7676	105.203	38.8963	13.6258	31.5123	34.3643	43.1414	32.5118	31.211	64.9038	367.6	65.7616	12.0273	139.467	418.139	22.3849	263.809	31.1804	84.0665	25.5485	32.748	112.423	28.2258	104.543	34.9243	76.3124	48.0983	38.639	12.1359	62.9666	14.1528	246.608	96.7505	134.347	53.4979	13.4613
ACCN3	9311	13.0648	85.7633	15.5585	4.3603	18.5974	6.0137	31.5965	37.2313	99.8752	42.6683	419.806	56.8519	39.7826	77.9661	6.3013	53.8303	10.2054	13.363	17.5953	29.9917	18.0351	41.5811	67.3963	52.2716	31.4319	26.5434	26.1404	69.2042	58.7379	80.9571	34.0716	89.1473	34.8563	41.2797	10.2881	10.4699
ACCN4	55515	2.7218	2.287	2.431	2.7252	1.0332	0.8591	1.2153	1.0488	3.1211	0	4.3057	11.4552	0	6.7797	0.4501	4.7968	13.7773	0.4454	1.4663	7.0351	0.9492	0.5133	1.7281	1.4656	0	0	1.0456	4.0369	2.4272	4.4976	4.7176	5.814	57.6594	0.3753	27.1605	1.4957
ACCN5	51802	0.5444	0	0	1.0901	0	0	0	0	0	0	0.5382	0	0	0	0	0	0	0	0	0	0	0	0	0	0	0	0	0	0	0	0	0	0	0	0	0
ACCS	84680	210.67	221.269	387.018	369.533	363.167	331.615	301.99	226.534	724.719	234.375	410.657	310.988	467.677	398.063	318.668	174.815	852.149	192.873	227.273	308.063	209.302	248.46	379.608	209.087	185.099	519.493	292.772	284.314	493.204	235	284.628	554.264	239.433	218.782	428.807	105.198
ACCSL	390110	0	0	0	0	0	0	0	0	0	0	0	0	0	0	0	0	0	0	0	0	0	0	0	0	0	0	0	0	0	0	0	0	0.3258	0	0	0
ACD	65057	428.416	475.7	561.079	898.76	394.163	479.381	784.445	445.202	1149.19	728.966	770.183	316.504	339.54	615.981	251.603	378.411	462.304	246.771	348.485	161.807	402.943	366.53	573.733	316.561	253.784	1162.7	631.029	543.829	688.835	239.498	420.915	386.628	516.329	215.405	458.436	779.758
ACE	1636	615.133	324.757	745.351	3799.97	156.529	828.179	445.39	234.4	291.511	835.337	38.7513	320.322	207.702	1100.73	917.745	227.047	105.115	213.363	676.442	2049.06	619.839	332.135	78.341	213.972	17.4622	378.244	932.688	118.224	747.087	620.671	2011.27	704.942	1327.47	22711.7	821.811	485.105
ACE2	59272	31.0289	21.7267	17.9895	15153	330.621	163.23	186.541	12.0608	3.7453	920.072	689.989	17.395	111.946	31.9613	2872.51	651.827	37.2496	12.0267	133.92	135.148	1997.15	9.2402	130.76	618.466	5.8207	0.474	55.4176	1336.79	1067.48	1956.46	2127.11	3.3915	34.5305	12.7592	280.658	19.9427
ACER1	125981	0	0	0	0.545	0.5166	0	0	0	11.8602	0	0	0	0.9252	0	0	0	0	0	0	0	1.4238	0	0	0	0	0	2.614	0.5767	0	0	0	0	0	0	0.823	0
ACER2	340485	48.9929	26.3007	123.982	30.5219	41.8442	6.8729	1.8229	36.1825	13.1086	3.0048	11.3025	50.4879	14.3402	18.8862	72.4654	13.8573	40.8215	28.9532	38.1232	63.686	53.6308	4.6201	3.4562	5.3737	6.9849	13.7457	10.4561	21.3379	30.0971	39.9163	17.822	7.7519	62.5458	232.667	61.3169	13.9599
ACER3	55331	382.689	183.533	312.143	244.72	240.734	262.887	89.9286	245.936	151.685	227.163	111.948	368.265	244.709	150.121	398.335	159.359	123.485	333.185	227.273	218.828	316.089	257.7	142.857	284.318	144.354	195.284	1010.06	267.013	170.388	467.752	241.646	236.919	206.531	373.393	237.86	332.045
ACHE	43	225.367	128.645	914.063	1273.2	73.3566	1078.18	30.9889	36.1825	915.73	48.0769	129.171	10.1824	296.056	306.053	241.701	3.7308	40.8215	459.688	333.822	72.9427	32.748	714.066	10.3687	58.1339	286.38	140.775	253.562	16.7243	36.4078	97.261	38.265	93.5078	133.887	91.1905	316.049	66.3094
ACIN1	22985	2963.53	2388.79	2750.94	3420.63	2157.3	2713.92	2224.52	2309.91	5476.28	5877.4	3865.98	3840.9	3719.67	2119.61	1852.59	3708.43	3950.5	3115.81	4104.11	3732.67	3329.38	3417.86	2146.89	2305.81	2230.5	2751.98	3526.34	3946.37	3769.42	3697.04	2235.62	2170.54	2950.4	3037.43	2212.76	2165.77
ACLY	47	3193.25	3773.01	3131.15	2910.48	3915.79	2508.59	1385.99	3590.46	1583.02	1355.17	6541.98	3162.92	3265.41	2699.27	3633.17	4551.06	3987.75	3069.93	3954.55	3915.95	2551.02	1602.16	2559.33	2894.48	1002.33	4402.89	2111.1	2029.99	4251.46	3026.9	5360.77	7169.57	3308.74	1907.87	5200	5784.37
ACMSD	130013	3.8106	1520.86	1.4586	741.245	226.786	1838.49	3807.99	719.455	0	732.572	180.301	86.975	228.519	676.029	306.515	946.028	1.0205	103.786	282.502	223.642	241.101	264.374	3358.87	24.9145	1203.73	154.521	1533.39	1955.59	1412.14	158.541	1422.09	188.469	8.4697	511.493	295.885	96.7219
ACN9	57001	160.043	101.772	389.936	130.263	93.5038	18.9003	32.8118	127.95	194.132	292.067	315.931	103.521	77.7148	15.0121	16.2034	157.76	468.427	164.365	60.6061	109.599	132.89	53.9014	51.2673	11.236	152.503	127.977	153.705	244.521	36.4078	208.015	15.2012	116.764	163.857	80.3077	35.8025	97.7191
ACO1	48	796.952	2303.6	1080.35	949.993	1430.45	320.447	971.593	1353.43	410.112	417.668	1701.29	1546.03	2877.76	452.784	580.173	7158.9	891.951	1834.3	608.504	1547.72	1383.96	1201.75	2528.8	1233.02	4057.04	2727.81	1276.17	1962.51	642.718	1316.12	717.075	3543.6	2103.75	2243.74	947.737	1427.89
ACO2	50	2173.64	7812.51	2393.9	5123.92	2677.18	5139.74	3403.34	4606.83	2679.84	3563.08	3046.07	1934.62	2385.31	3183.43	6069.34	8366.04	2739.45	2494.89	3295.12	2875.36	2118.44	3858.02	12357.3	8137.42	10910.5	4287.45	2838.91	9179.2	2650.75	1933.97	3068.49	10555.5	2923.72	7890.86	2700.8	3142.93
ACOT11	26027	362.003	14.5169	469.187	568.857	100.778	128.866	131.788	28.5265	14.432	227.819	25.8881	273.653	144.346	308.421	432.227	175.45	343.921	422.249	424.096	91.7153	104.248	181.309	7.4885	99.9707	10.908	17.0636	200.403	6.1534	205.825	372.74	177.549	651.899	128.486	507.5	325.996	139.599
ACOT12	134526	0	1.7153	0	0	1.5498	0	1.8229	457.263	0	10.8173	74.2734	0	0	0	0	0	5.613	0	0.9775	117.004	92.5486	1.0267	0	0	334.109	0	402.039	200.692	0	0.5622	0.5242	46.0271	0	0.3753	65.8436	2.4928
ACOT13	55856	428.356	711.938	558.522	486.699	585.365	478.411	425.575	815.448	541.667	1788.11	514.683	1133.08	867.556	609.429	705.624	975.257	864.238	704.935	686.887	1069.77	518.415	578.034	1055.62	875.403	966.251	458.637	1099.41	1242.45	630.835	431.76	693.251	1096.61	466.97	884.184	422.609	624.455
ACOT1	641371	482.853	249.285	406.466	494.89	188.557	243.986	396.172	653.907	285.268	444.111	408.504	268.986	278.478	351.574	203.893	321.916	140.324	262.806	210.655	511.339	460.37	270.021	379.032	886.175	1417.93	191.492	577.702	600.923	291.262	288.41	180.317	307.171	138.448	386.903	227.983	166.023
ACOT2	10965	317.91	213.837	290.264	359.722	156.529	222.509	153.122	404.824	172.909	246.394	317.007	257.106	210.478	200.484	171.036	314.988	128.588	240.089	158.358	300.287	317.038	131.93	235.599	584.758	739.232	176.324	375.899	433.103	290.777	289.534	199.712	215.116	120.857	464.584	169.547	147.576
ACOT4	122970	36.4725	36.5923	263.036	59.4086	56.8255	67.8694	39.4957	90.7184	18.1024	44.4712	30.1399	148.918	57.3609	91.5254	49.5105	95.4023	19.3902	115.813	28.348	69.9806	75.4627	42.6078	65.0922	138.74	532.014	10.9018	187.688	31.7186	106.796	103.445	37.2166	72.6744	110.758	71.6765	80.2469	43.8739
ACOT6	641372	0.5444	1.1435	0.9724	0	1.0332	0	1.8229	6.817	1.8727	2.4038	2.1529	2.9699	3.7007	1.4528	6.3013	29.3136	1.0205	3.118	1.955	2.9621	4.2715	3.0801	6.3364	5.3737	22.1187	0.948	11.5018	2.3068	4.8544	1.6866	0.5242	2.907	1.303	0	1.2346	1.9943
ACOT7	11332	642.896	539.165	510.514	3006.4	1298.72	204.467	1051.19	434.714	812.734	1471.15	1082.88	305.897	599.052	694.431	656.24	577.744	345.452	956.793	486.315	961.215	449.454	698.665	610.599	2532.98	612.34	800.095	928.506	2280.28	405.825	389.606	580.789	594.961	630.019	615.818	642.387	2950.02
ACOT8	10005	519.412	420.023	418.563	877.635	344.946	369.253	958.937	287.278	752.428	754.91	550.457	357.743	398.376	433.332	380.79	307.814	499.4	289.074	393.871	473.502	274.836	552.531	723.917	674.04	571.083	275.108	452.448	435.871	396.194	266.163	368.764	302.704	513.573	282.128	467.169	464.131
ACOT9	23597	921.067	858.776	861.067	534.678	755.779	682.131	657.451	763.503	559.925	484.375	927.879	641.493	611.079	748.668	608.979	801.06	661.309	677.506	518.084	647.228	776.459	951.232	1011.52	1055.69	321.304	1006.75	613.253	675.894	466.019	701.628	633.731	654.07	849.581	931.795	1094.65	1142.22
ACOX1	51	1221.88	1821.2	1947.92	3877.91	2413.53	2313.92	2018.55	3476.45	708.489	4324.52	2478.94	1154.15	1345.21	2150.91	3187.6	801.592	1514.31	1663.17	3406.37	2017.22	4304.7	1481.05	1608.31	2127.02	3636.79	1195.9	3901.16	4245.67	2557.77	1939.2	2631.55	2008.4	1371.71	2343.91	2165.98	1071.42
ACOX2	8309	92.5422	19.4397	38.4101	244.72	20.1472	3.4364	23.0898	647.09	86.1423	42.6683	149.085	48.7908	14.3402	24.2131	22.0547	59.1601	17.8594	42.3163	72.825	370.267	287.613	5.1335	23.6175	14.6556	152.503	8.5318	708.927	267.589	87.8641	25.2991	57.6595	57.1705	26.3865	917.159	218.93	87.7477
ACOX3	8310	295.591	491.709	466.27	534.678	525.378	149.484	411.97	327.216	423.221	399.038	271.259	813.322	543.541	457.143	493.755	391.203	152.06	458.352	347.996	339.165	545.8	575.975	565.092	185.637	781.141	532.764	377.99	482.122	380.097	354.75	78.1025	296.512	559.329	376.771	367.901	613.237
ACOXL	55289	13.0648	1.7153	0.9724	7.0854	4.6494	3.4364	0.6076	4.1951	7.4906	9.6154	1.6146	0.8485	6.9388	2.9056	8.1017	0	0.5103	2.6726	9.7752	1.4811	3.7969	1.54	0.576	1.9541	1.1641	1.422	3.1368	1.7301	2.4272	2.2488	2.6209	1.4535	2.6061	1.5011	3.2922	0.9971
ACP1	52	1436.04	3262.44	1190.71	2421.04	2561.28	1841.07	2391.61	3252.75	1054.93	1609.38	3060.28	1793.38	2694.11	2049.39	3016.99	2095.12	3474.93	1346.1	2021.51	1859.11	1818.22	2016.43	2618.66	2870.05	2245.63	3453.02	2025.88	2888.12	1816.02	1505.01	2664.4	2107.07	1175.01	1854.58	1640.33	1128.75
ACP2	53	1580.29	1226.99	1235.93	1008.31	1238.28	1338.49	1203.71	1077.61	1038.08	1043.87	1245.96	557.064	1029.26	1178.21	997.862	964.683	737.339	1190.65	692.571	1125.98	713.337	1551.85	2803.57	2794.82	1825.38	1815.38	1022.09	1133.22	1277.18	1000.16	1775.91	1360.47	904.956	1406.14	1250.21	1571.98
ACP5	54	1356.56	452.258	1425.06	417.496	627.147	213.058	308.674	1233.88	5631.09	295.673	325.081	889.69	1220.31	1686.68	560.819	439.703	340.86	808.909	862.17	755.716	648.315	210.986	486.751	430.386	951.106	287.238	1132.4	403.114	1954.85	1415.62	461.276	368.217	1014.74	443.193	1927.16	1136.73
ACP6	51205	307.022	62.3213	517.807	190.217	396.745	435.567	305.028	184.059	212.235	336.538	393.434	970.301	182.722	438.257	362.327	328.845	616.915	413.808	515.152	139.591	325.581	315.195	214.286	231.07	327.125	202.868	409.881	238.178	224.272	347.441	183.986	215.116	902.354	140.351	337.037	330.55
ACPL2	92370	522.591	122.927	302.905	360.812	168.927	205.327	78.9913	111.169	267.79	235.577	126.48	198.982	163.294	199.516	186.79	210.525	369.945	267.706	377.81	210.312	225.914	189.938	61.6359	145.579	132.713	94.798	422.428	125.721	101.942	314.833	165.116	272.287	276.896	234.919	127.16	145.582
ACPP	55	35.9281	20.5832	55.4273	23.4364	17.0477	4.2955	4.2534	6.2926	7.4906	2.4038	98.493	4.6669	6.0136	0.9685	69.3147	2.1319	38.2702	9.7996	16.129	20.735	4.7461	19.5072	0.576	1.9541	0	35.0752	7.8421	1.1534	2.9126	11.8062	6.2901	1.4535	4.8864	21.7656	11.9342	36.3954
ACPT	93650	2.1775	0	1.4586	0	0	0	1.8229	0	0	0	0.5382	0.8485	0	0	0.4501	0	0	0	0.4888	0.3703	0	0	0.576	0	10.4773	0	0	0	0.4854	0	0	0	0.3258	0.3753	0	0
ACR	49	5.988	0	1.9448	0.545	2.0664	1.7182	3.0381	2.6219	7.4906	1.8029	2.1529	1.6971	2.7755	3.3898	1.8004	0.533	0	0.4454	8.3089	0.7405	1.8984	1.0267	1.7281	5.3737	1.1641	0	4.1825	0	0.4854	1.6866	2.0967	1.938	1.9546	1.5011	1.2346	1.4957
ACRBP	84519	53.3478	16.5809	22.8516	598.447	20.1472	8.5911	31.5965	21.4997	94.8814	63.101	60.2799	22.4862	26.3675	39.2252	19.8042	10.1265	146.958	21.8263	23.4604	18.5134	68.3436	11.807	6.9124	39.5701	24.447	9.9538	59.0772	45.5594	61.6505	32.6077	98.0212	58.624	32.9017	31.8979	14.8148	18.447
ACRC	93953	26.6739	29.7313	18.4758	32.157	39.7779	20.6186	19.444	12.0608	98.6267	29.4471	29.6017	16.1222	33.3063	108.475	46.3599	19.1871	25.0032	11.1359	149.56	61.0941	76.412	61.0883	19.0092	16.6097	37.2526	18.4856	32.9369	17.301	41.2621	31.4833	70.2398	26.1628	22.1516	12.7592	45.679	10.4699
ACRV1	56	1.0887	1.1435	1.9448	1.0901	1.0332	0	0.6076	0	1.2484	6.0096	0	5.0912	1.8504	0.9685	3.6008	0	1.0205	0.4454	2.4438	1.8513	0	0	1.1521	0.977	6.9849	0	1.0456	1.1534	3.8835	0.5622	2.6209	1.4535	1.9546	0.3753	1.2346	1.4957
ACSBG1	23205	10.343	11.4351	11.6689	3.8152	4.1328	6.0137	3.6458	2.0975	11.236	1.8029	1.6146	3.8184	3.7007	4.8426	10.8023	5.3297	9.6951	3.118	3.4213	3.7027	5.6953	6.6735	17.2811	4.8852	0	6.6359	7.3193	15.5709	4.8544	3.3732	1.0484	6.2984	3.5834	2.2516	6.5844	3.49
ACSBG2	81616	4.8993	2.8588	0	0.545	1.5498	0.8591	1.2153	1.5732	0.6242	0.601	1.6146	3.3941	1.3878	1.4528	0	1.0659	2.5513	1.3363	2.9326	1.8513	2.8477	0	1.1521	0.4885	1.1641	0.474	0	0.5767	1.4563	1.1244	0.5242	1.4535	0.9773	1.5011	1.2346	0
ACSF2	80221	899.837	226.415	399.173	982.695	403.978	79.0378	488.531	310.96	704.744	1356.92	1817.01	422.995	154.505	506.053	408.687	191.338	614.874	183.519	454.546	336.573	362.126	389.117	115.207	190.034	1636.79	1040.88	691.152	566.321	404.369	178.78	196.042	200.097	260.282	338.493	455.967	367.942
ACSF3	197322	573.762	578.616	529.476	1318.98	416.376	225.086	960.656	556.896	975.655	635.817	615.716	389.902	518.561	474.092	179.588	489.803	473.53	257.016	471.163	258.077	290.46	325.975	460.253	467.513	654.249	896.789	547.379	766.436	697.087	220.383	240.073	38.2752	399.381	595.928	334.156	463.168
ACSL1	2180	1592.27	660.377	968.518	459.463	581.687	366.839	141.577	4151.02	750.936	235.577	1085.58	320.747	520.412	508.475	1259.37	586.804	1357.32	370.156	774.193	2005.74	2738.49	490.76	272.465	560.332	17114.1	724.256	3523.2	1235.29	569.418	963.052	191.849	927.81	1526.51	1999.06	1561.32	997.133
ACSL3	2181	1611.87	1126.36	1537.86	1556.62	1329.2	701.031	461.796	2308.86	611.735	1400.84	1472.55	3203.22	1068.58	1480.39	897.491	2700.58	2271.21	973.274	2046.43	2390.45	1113.91	1170.94	1625.58	1126.04	2309.66	1275.51	1508.3	969.435	1398.54	1585.41	1327.74	1577.52	1450.93	1188.1	2200.82	2324.32
ACSL4	2182	1735.98	1799.89	1983.23	2185.58	1864.91	605.67	258.241	1069.22	651.685	273.438	1290.1	5263.47	951.544	913.317	1174.75	1596.79	1116.98	5923.39	994.135	1255.58	738.016	2507.7	1744.24	888.129	17955.8	5192.08	781.597	236.447	2700.97	2052.04	879.046	895.833	454.76	532.133	778.601	2874.24
ACSL5	51703	2307.02	194.969	3817.19	721.079	1168.02	143.471	154.337	987.939	1564.29	54.6875	339.613	79.3381	565.745	32.9298	461.798	133.776	7321.34	293.541	345.063	496.159	604.651	465.092	61.0599	180.752	1385.33	167.792	1647.37	380.623	122.816	312.584	120.561	183.139	51.1442	1122.81	619.342	881.466
ACSL6	23305	20.6859	5.1458	1.4586	3.8152	18.5974	5.1546	1.2153	7.3414	21.8477	0.601	8.0732	1.6971	43.9459	7.2639	4.501	30.3795	0	1.7817	5.3763	7.7756	14.2383	2.5667	0.576	12.213	249.127	9.9538	16.207	2.3068	0.9709	1.6866	12.5803	55.2326	7.1667	394.409	4.1152	0.9971
ACSM1	116285	32.1176	194.969	22.3654	2.7252	58.3753	7.732	72.3075	18.3534	33.7079	43.8702	197.524	60.6703	48.1092	30.9927	21.1545	10.1265	0.5103	113.586	18.5728	7.0351	5.6953	65.1951	86.4055	51.2946	902.212	106.648	12.0246	5.767	18.4466	9.5574	69.7156	28.5853	128.675	78.8066	53.4979	50.3552
ACSM2A	123876	1.6331	313.322	0	0	12.9149	1.7182	103.904	1857.89	0	150.24	575.35	2.5456	4464.44	43.5835	3.6008	7.9946	64.8042	1.7817	0.9775	1059.34	773.612	3.5934	92.7419	310.21	8018.63	16.1157	2285.19	797.001	82.5243	0.5622	89.1102	177.326	6.5152	2167.18	522.634	20.4412
ACSM2B	348158	3.2662	463.693	0	0.545	13.9481	0.8591	114.234	1307.29	1.2484	183.894	651.238	1.2728	1280.91	61.0169	3.1507	13.8573	25.5135	1.7817	0	874.202	681.538	7.7002	164.746	301.417	3388.82	17.0636	1903.54	709.343	92.233	0	145.197	177.326	3.2576	366.639	352.675	17.4498
ACSM3	6296	114.219	882.687	187.777	974.792	153.889	100.576	379.438	259.628	50.5181	235.445	386.921	67.1744	116.549	47.5303	566.792	40.1009	104.171	179.403	435.528	180.687	405.534	621.391	106.158	104.602	24.2491	1712.13	704.342	506.62	211.51	64.479	166.007	267.907	814.418	328.41	190.189	63.5174
ACSM4	341392	0	0	0.4862	0	0	0	0	0	0	0	0	0	0	0	0	0	0	0	0	0	0	0	0	0	1.1641	0	0	0	0	0.5622	0	0	0	0	0	0
ACSM5	54988	9.2542	16.5809	6.3207	4.9053	13.9481	9.4502	2.4305	900.891	16.8539	16.8269	228.202	11.031	125.361	16.9492	9.452	15.4562	12.7567	8.0178	16.6178	498.75	426.673	5.6468	8.6406	9.7704	831.199	12.3237	602.797	238.178	10.6796	16.8661	11.5319	111.434	14.6592	66.798	229.63	17.9484
ACSS1	84532	902.558	8518.01	851.829	2372.53	317.19	737.113	2541.09	906.135	2300.25	1475.36	2249.73	1737.38	829.421	1410.17	1947.56	242.503	1070.54	345.657	1486.31	351.014	582.819	1256.67	1894.01	2175.38	790.454	1736.22	811.397	2556.52	606.311	626.293	493.775	1636.63	1458.75	283.704	767.49	399.85
ACSS2	55902	881.873	1600.91	605.81	2216.65	1205.73	306.701	935.136	832.722	542.447	500.601	982.777	689.011	1389.15	1031.48	1321.48	388.538	681.209	832.517	1351.91	612.423	788.799	1204.31	911.29	693.21	1197.9	1415.81	1393.8	1251.44	997.573	684.2	1386.97	887.112	855.77	1471.43	897.531	667.082
ACSS3	79611	161.677	117.21	123.01	2.1801	89.371	4.2955	3.6458	401.678	25.593	4.8077	269.107	77.2168	557.419	12.5908	21.6046	237.173	33.6778	102.45	44.477	216.236	137.162	15.4004	212.558	1.9541	23.2829	22.7515	370.671	112.457	13.1068	14.0551	19.3946	351.26	24.432	302.092	79.4239	168.516
ACTA1	58	88.7316	1.1435	1.4586	1.6351	7.2323	0.8591	8.5068	0.5244	7.4906	4.2067	0.5382	26.3046	2.3129	5.3269	0.9002	39.973	1.5308	27.1715	3.9101	224.752	5.2207	3.0801	2.8802	3.9082	2.3283	0.948	1.0456	2.3068	6.3107	280.539	8.911	1.4535	5.2122	0.7505	4.1152	0
ACTA2	59	10535.1	4993.54	14786.8	3324.67	3647.82	1130.31	9901.45	5820.22	7241.75	1141.59	1940.38	3939.53	2496.26	2804.04	4516.73	2421.53	2007.41	8701.35	6904.21	8182.91	4163.48	1793.89	7168.71	2812.98	665.378	3086.21	3272.14	4950.24	6077.36	6795.48	1763.96	3512.51	8680.38	5440.32	6651.68	4122.22
ACTB	60	115144	78797.6	154097	91502.4	92019.1	119260	91098.3	85082.9	223801	105237	73629.7	77750.5	67514.7	107726	76257.9	73256.7	80683.3	76079.3	100031	104060	77480.2	99667.4	88720.6	94999.5	62573.9	92456.5	93078.6	96469.4	99606.3	94248.7	48484.3	135414	108805	57305.2	125693	166918
ACTBL2	345651	23.9521	13.7221	12.6413	0	6.7157	0	0	1.0488	0	0	2.6911	2.5456	8.3266	0	12.6027	2.1319	0	22.2717	12.7077	38.5078	19.9336	64.1684	2.3041	6.8393	0	728.522	0	0.5767	4.8544	26.4235	6.2901	0.4845	36.1593	0	97.5309	5.4842
ACTC1	70	6.5324	4.0023	7.2931	1.6351	3.6162	0.8591	40.7109	8.9145	1.2484	11.4183	5.3821	15.6979	6.9388	2.9056	4.0509	10.6595	1.0205	2.2272	6.8426	8.5162	1.8984	3.5934	10.3687	13.6786	0	0	2.0912	4.6136	9.2233	5.0598	0	27.1318	7.1667	0.7505	40.7407	0.9971
ACTG1	71	102060	69749.6	111228	44708	87278.8	126170	100965	86779.2	84544.9	96269.8	130274	73108.6	48394.6	84114.3	65380	71750	84309.2	74140.8	71047.4	65561	62844.3	83888.1	79349.1	75294.1	50196.7	145629	71921.6	97681.7	123817	108848	72918.9	143239	101983	50887.3	77605.8	141040
ACTG2	72	624.388	126.358	428.346	410.41	186.491	8.5911	380.981	192.449	165.418	55.2885	47.901	132.796	85.5788	167.07	140.88	167.887	40.8215	95.7684	149.56	571.693	57.4276	44.6612	113.479	114.314	4.6566	39.8151	31.3684	43.8293	89.8058	428.398	26.2089	95.9302	621.875	144.104	612.346	163.031
ACTL6A	86	1464.34	840.48	1081.8	1279.19	908.692	803.265	383.412	595.176	607.99	1174.28	1158.77	835.384	799.352	476.513	739.507	1798.79	2175.79	840.98	1122.68	1278.16	874.229	578.542	733.871	926.234	983.702	1296.84	909.685	741.061	531.068	985.54	470.712	761.628	1093.9	779.435	913.992	1176.62
ACTL6B	51412	0	0	11.1827	0	0	0	0	0	0	0	0	0	0	0	0	0	0	0	0	0	0	0	0	0	15.1339	0	0	0	0	0	0	0	0	112.581	0.4115	0
ACTL7A	10881	0	0.5718	0.4862	0	0	0.8591	0	0	0	0	0	0	0	0	0	0	0	0	0	0.3703	0	0	0	0	0	0	0	0	0	0	0	0	0	0	0.4115	0
ACTL7B	10880	0	0	0	0	0	0	1.2153	0	0	0	0	0	0.4626	0	0	0	0	0	0	0	0.4746	0.5133	0	0	0	0	0	0	0.4854	0.5622	0	0	0.3258	0	0	0
ACTL8	81569	0.5444	0.5718	0	71.9444	0.5166	0	0	3.1463	0	0.601	0	0.4243	3.7007	0	0.9002	0	1.5308	0	23.9492	1.1108	0.4746	0	40.8986	0	0	1.422	0	1.1534	0	0.5622	17.2979	121.124	0	0	0.4115	0.4986
ACTL9	284382	0	0	0.4862	0.545	0	0	0	0	0	0	0	0	0	0	0	0	0	1.3363	0	0	0	0	0	0	0	0	0	0	0	0	0	0	0	0	0	0
ACTN1	87	13354.4	4176.67	6700.86	3451.7	4778.51	4190.72	2164.36	4637.13	2532.46	1240.38	2556.51	6042	3227.94	2209.2	3306.4	6502.28	4264.83	9020.94	3453.57	10661.1	5506.41	2444.05	3580.65	7146.07	1429.57	5685.98	3939.35	3550.17	7818.93	11095.6	3674.49	6504.85	3899.34	6258	6755.56	10782.5
ACTN2	88	8.7099	4.0023	6.8069	1.6351	144.13	2.5773	52.2558	0.5244	1.8727	1.8029	1.0764	1797.62	83.2659	0.9685	6.3013	28.7806	0	5.3452	351.906	25.5485	7.5937	20.0205	2.3041	1.9541	216.531	2.3699	3.1368	2.8835	2.4272	283.35	4.1934	13.5659	33.5532	12.7592	4.9383	1.9943
ACTN3	89	0.5444	2.287	1.9448	7.6305	0.5166	0	0	1.0488	2.4969	1.2019	1.0764	0.4243	2.3129	1.937	0.9002	1.0659	0.5103	0.8909	2.4438	2.9621	0.9492	0.5133	0	0	1.1641	1.422	1.0456	0.5767	0.9709	2.811	0	1.4535	0.3258	0.7505	0.823	0
ACTN4	81	15172.9	17061.2	15584.7	17129.4	10938.8	15708.8	10500.1	12945.2	5387.83	9937.39	8300.1	9551.09	12875.4	9441.92	10771.8	20894.7	20808.9	11769.1	9391.98	19830.6	12367.8	9435.32	14316.8	11819.4	7194.99	40856	9404.14	12540.9	13351.4	12544.1	11509.6	14227.4	10286.3	6503.46	10500.2	14038.4
ACTR10	55860	1216.66	609.491	1326.85	705.818	462.87	947.595	708.492	857.892	716.604	865.986	1030.14	860.416	572.222	653.269	606.279	850.626	758.26	1064.14	601.662	800.518	858.092	1125.26	608.295	897.899	892.899	611.921	956.738	1039.79	966.99	931.569	656.795	607.074	1409.56	1206.87	842.798	812.664
ACTR1A	10121	4216.11	2464.27	2443.17	1859.11	2196.05	2083.33	2867.99	2168.85	2877.65	2232.57	2644.24	2820.96	2608.07	2143.34	1930.91	1024.38	2092.61	2498	2021.02	1956.86	1746.08	3001.54	3585.83	4128.97	3536.67	2983.77	2291.99	2295.85	2374.27	1334.67	2126.59	2372.58	1636.62	2690.31	2916.46	2888.7
ACTR1B	10120	1339.14	2459.12	1323.45	1217.06	1912.95	1206.19	1828.95	3143.16	1823.97	1281.85	2630.25	1605.85	2386.49	2015.98	1654.1	1957.08	1102.18	1086.41	960.411	1911.69	1717.13	1261.81	2976.96	2176.84	1272.41	2620.69	1599.79	1792.96	1682.52	2246.56	1395.36	1670.54	2188.13	1964.54	1243.62	1188.08
ACTR2	10097	5409.91	5405.95	5792.15	6750.78	5080.72	4458.76	1812.55	8681.17	5408.24	2219.95	4631.32	4767.08	5784.2	3329.3	5262.97	6209.68	7937.24	4642.76	4309.38	5407.76	4663.98	2958.42	2880.18	4445.04	4093.13	5467.47	3643.97	3914.07	4977.67	5130.66	5661.12	5720.45	4712.11	5130.69	6297.53	7836.97
ACTR3	10096	5262.93	3945.11	4602.89	2983.51	4809.51	3277.49	1463.77	5691.66	5203.5	1570.91	3087.73	4518.46	4407.54	2562.23	3490.04	4995.03	3383.59	4125.17	3405.67	4963.81	2863.79	2932.24	2195.85	3494.38	2286.38	4291.03	2960.14	2551.9	3634.95	6021.18	3627.31	5884.21	3722.45	3348.16	5686.83	7776.14
ACTR3B	57180	91.9978	105.203	102.103	89.9305	116.751	30.9278	140.362	85.999	181.024	191.106	235.199	132.372	58.7487	106.053	134.129	66.6217	369.945	100.223	181.329	125.521	102.515	70.8419	164.171	84.0254	158.324	155.943	169.39	107.266	61.6505	107.943	171.93	87.6938	119.228	250.305	86.4198	106.195
ACTR3C	653857	87.0985	58.319	32.0895	124.268	99.703	103.952	44.9643	48.7677	16.8539	71.5144	212.056	36.0628	29.1431	31.9613	97.6708	69.8196	41.8421	101.559	71.3587	131.075	39.8671	65.1951	60.4839	224.719	31.4319	8.5318	102.47	79.5848	57.2816	49.4738	135.762	252.907	52.773	28.5205	219.342	37.3925
ACTR5	79913	268.372	107.49	200.802	217.468	130.699	128.866	246.696	99.6329	524.345	382.812	214.747	228.256	143.865	223.245	220.997	106.595	532.211	214.699	371.945	136.999	187.47	296.201	186.06	190.523	174.622	187.7	285.976	97.4625	222.815	291.783	178.22	101.744	265.494	219.157	260.905	253.272
ACTR6	64431	439.303	384.791	272.76	287.778	391.579	169.244	276.47	276.35	399.501	282.452	398.816	342.384	413.554	400.969	212.445	426.912	271.974	540.312	391.007	340.276	380.161	536.961	383.641	523.205	338.766	201.92	268.723	325.26	396.116	371.053	341.24	334.302	185.031	436.063	358.025	518.509
ACTR8	93973	399.02	279.588	481.828	273.607	356.968	280.069	298.344	255.375	356.43	262.019	198.062	422.571	375.159	271.186	318.218	332.576	215.844	212.027	281.525	482.459	342.667	253.593	293.203	314.118	129.22	291.978	279.702	482.699	377.67	233.314	349.102	341.57	379.836	277.324	340.329	559.392
ACTRT1	139741	0	0	0.9724	0	0	0	0	0.5244	0	0	0	0	0	0.4843	0	0	2.5513	0	0	0	0	0	0	0	0	0	0	1.1534	0	0	0	0	0	4.5032	0	0
ACTRT2	140625	0	0	0	0	0	0	0	0	0	0	0	0	0	0	0	0	0	0	0	0	0	0	0	0	0	0	0	0	0	0.5622	0	0	0	0	0	0
ACVR1	90	1151.88	2365.35	1357.97	950.538	1286.84	2266.32	807.535	4480.86	296.504	1322.12	1077.5	1137.04	1383.14	835.351	818.724	2121.77	398.52	1930.96	869.013	1016.75	986.236	1233.06	1316.24	1644.85	596.042	1369.83	908.117	2311.42	2224.27	2416.91	2453.15	3237.89	687.352	681.115	1467.08	1255.39
ACVR1B	91	1760.48	1858.2	1095.42	2222.1	1382.41	1238.83	535.926	1279.5	395.755	915.264	1047.9	984.726	1271.65	1460.05	2511.08	1192.8	1475.19	1587.53	713.099	2207.16	822.971	1346	1778.8	2000	3345.75	1475.06	901.843	576.701	2555.34	873.662	2665.44	1575.1	1648.34	3416.83	760.494	564.377
ACVR1C	130399	13.6091	6.2893	36.4653	1.0901	12.3983	2.5773	1.2153	37.7556	48.0649	9.6154	2.6911	5.0912	12.0273	4.8426	17.1036	12.2584	55.6193	5.3452	24.9267	8.1459	18.9843	10.2669	4.0323	3.4196	68.6845	9.9538	8.3649	17.8777	11.165	21.9259	4.1934	38.2752	1.303	1.1258	6.5844	8.4756
ACVR2A	92	450.19	342.481	527.531	303.584	173.06	123.711	263.102	425.8	196.005	436.298	165.77	1256.26	417.255	780.145	257.455	333.109	313.815	297.105	525.415	331.019	369.72	466.632	409.562	193.942	115.25	326.105	487.779	442.33	612.621	434.582	584.982	191.861	337.161	628.952	349.383	159.043
ACVR2B	93	213.391	132.647	150.723	105.191	211.804	145.189	91.1439	110.121	101.124	177.284	59.2034	224.438	173.933	183.535	162.034	113.523	384.233	158.575	173.02	350.273	130.517	169.918	87.5576	49.3405	66.3562	110.914	101.425	74.3945	158.252	297.967	212.292	137.597	315.661	284.079	117.695	110.183
ACVRL1	94	609.145	348.199	581.014	535.768	308.408	107.388	557.193	227.058	1244.69	54.0865	90.958	317.777	365.907	166.102	734.106	377.345	136.242	992.428	684.262	392.484	303.749	470.739	418.203	234.489	422.584	145.515	571.429	274.51	489.806	543.649	382.125	234.012	210.766	485.224	349.383	336.034
ACY1	95	713.664	668.382	768.494	1511.75	574.971	1550.69	1859.95	1789.2	471.91	1735.58	1240.04	888.239	308.084	838.257	587.375	791.466	297.303	664.967	849.951	847.542	1336.97	493.84	2653.8	1685.39	1108.27	555.516	2066.14	3331.11	1397.57	517.08	749.574	1010.61	643.355	1564.87	1070.74	752.337
ACY3	91703	154.055	98.9137	150.237	327.565	98.1532	173.54	340.878	116.938	180.399	48.6779	107.104	10.6067	47.6466	15.0121	186.79	18.6541	223.498	73.0512	154.936	44.0618	84.0057	71.8686	292.627	41.5242	146.682	89.1101	308.979	326.99	94.6602	24.1747	24.1122	94.9612	78.8338	374.894	82.3045	123.644
ACYP1	97	125.204	82.3328	163.364	95.3808	36.6783	176.976	74.1303	33.5606	202.871	325.12	121.636	49.2151	25.9049	129.782	93.1698	109.793	200.025	66.3697	58.651	59.6131	61.6991	63.655	70.8525	79.6287	150.175	72.0465	104.039	87.0819	69.4175	53.9714	57.1354	47.9651	71.9928	77.3056	98.7654	97.2205
ACYP2	98	94.7197	186.392	119.12	109.552	141.547	96.2199	162.236	230.204	164.17	152.644	92.0344	47.9423	136.464	133.656	172.837	123.65	84.1944	45.8797	95.3079	91.8263	97.7693	110.37	292.051	147.533	111.758	127.977	138.544	123.991	95.1456	57.3446	97.4971	90.1163	58.9625	231.541	103.704	152.561
ADA	100	269.461	70.8977	92.865	82.3	101.253	21.4777	104.512	317.252	773.408	78.125	433.262	84.4294	111.946	50.3632	139.08	137.507	158.694	77.951	163.245	94.4182	120.076	97.5359	62.212	399.121	138.533	82.0002	210.169	42.6759	147.573	228.254	60.2804	137.597	89.2581	190.637	130.864	190.452
ADAD1	132612	0	0	0	0	0	0	0	0	0	0	0	0	0	0	0	0	0	0	0	0	0	0	0	0	0	0	0	0	0	0	0	0	0	0	0	0
ADAD2	161931	5.9717	2.8588	0.9724	4.3439	1.0332	0	1.2153	0	26.0549	0.601	0.5382	0.8485	0	0.4843	0.9002	1.0659	1.0205	0	0.9775	0.7405	0.9492	0.5133	0.576	0	0	0.948	0.5228	0	0	0.5622	0	0.4845	0	1.4148	0	0.4986
ADAL	161823	33.7507	199.543	91.8925	61.0437	127.082	49.8282	39.4957	111.169	153.558	149.639	193.757	109.461	241.471	171.913	170.136	532.974	325.041	89.9777	99.7067	45.1726	130.517	86.7556	200.461	54.2257	183.935	187.226	65.3509	197.232	123.301	42.1652	133.665	221.415	71.6671	122.338	162.14	93.232
ADAM10	102	1500.27	1596.34	2431.51	2355.09	4710.84	3769.76	196.263	2242.27	266.542	540.264	1422.5	2293.17	3490.23	1392.25	2211.77	5980.5	1476.72	2869.49	1289.35	3419.05	2986.24	802.875	351.382	1145.09	555.297	5349.92	1365.57	1433.1	2045.15	2900.96	4793.08	977.229	2157.18	1970.54	2551.03	1035.02
ADAM11	4185	7.6211	22.8702	6.8069	10.3556	9.8153	1.7182	107.55	28.8411	21.2235	31.851	157.696	5.9398	20.8165	50.3632	23.405	5.3297	2.5513	16.4811	11.2414	7.4054	25.1542	39.0144	39.7465	6.8393	13.9697	49.2949	9.9333	49.5963	33.0097	13.4928	28.8298	51.8411	3.5834	6.7549	22.6337	3.9885
ADAM12	8038	257.485	139.508	704.996	209.293	70.257	17.1821	15.7983	159.937	282.147	4.2067	215.285	59.8218	50.8847	36.3196	116.575	93.8034	386.784	153.229	48.3871	385.078	228.287	45.6879	36.2903	434.783	9.3132	1589.76	66.9194	83.045	42.7184	127.058	76.0058	217.539	62.8716	17.2624	96.2963	496.074
ADAM15	8751	2596.71	1599.32	4155.3	2486.99	1451.12	2640.3	2875.89	3082.68	1363.3	999.483	5521.01	5248.52	1499.58	2568.23	3400.02	1903.21	2901.68	1470.13	3900.58	872.432	1172.92	3308.52	2219.47	1590.69	3497.19	2533.52	3176.8	3614.54	2228.81	3737.9	1854.97	2065.49	3163.18	2396.93	2301.46	2859.33
ADAM17	6868	646.162	449.971	566.428	329.745	883.379	636.598	41.3185	1353.43	213.483	172.476	315.931	497.242	543.078	268.765	788.117	557.49	1225.67	548.775	555.23	978.617	516.849	243.84	148.042	270.151	152.503	613.343	381.649	328.143	840.777	666.209	904.207	687.015	275.918	383.526	655.556	385.392
ADAM18	8749	0.5444	0	0	0	0	0	0	0	0	0	0	0.4243	0	0	0	0	0	0	0	0.3703	0	0	0	0	0	0	0	0	0	0	0	0	0	0	0	0
ADAM19	8728	1395.75	354.488	489.607	258.891	422.059	96.2199	66.8388	379.654	3476.28	78.726	87.7287	126.856	516.248	129.782	286.711	212.656	226.049	428.508	429.13	810.516	482.202	193.018	202.189	125.061	291.036	177.272	474.186	219.723	200.971	464.379	320.797	268.895	160.925	290.459	479.012	5792.85
ADAM20	8748	1.6331	0.5718	0.4862	3.2702	1.0332	0.8591	0	1.0488	1.8727	1.2019	0	0.8485	0.9252	0	0	0	3.0616	0.4454	0	2.2216	1.8984	0	0	1.4656	0	0.948	1.0456	2.8835	1.4563	1.1244	1.0484	0.4845	0.3258	1.1258	0.823	0.4986
ADAM21	8747	1.0887	4.0023	6.3207	0	1.5498	0	1.2153	3.6707	0.6242	8.4135	1.0764	4.2427	0.9252	0.4843	1.3503	6.3957	0	3.5635	1.955	3.7027	8.0683	1.0267	1.1521	1.4656	5.8207	0.948	2.0912	1.1534	5.3398	7.8708	2.0967	1.4535	1.303	0.7505	1.2346	13.4613
ADAM21P1	145241	1.6331	1.7153	0.9724	1.0901	0.5166	0	0	1.5732	0	3.0048	0.5382	0.4243	0.4626	0	0	2.6649	1.0205	0.8909	0.9775	0.7405	2.8477	0	0	0	2.3283	0	0	0	1.9417	2.2488	0	0	0.9773	0	0.4115	3.49
ADAM2	2515	0	0	0	0	0	0	0	0	0	0	0	0	0	0	0	0	0	0	0	0	0	0	0	0	0	0	0	0	0	0	0	0	0	0	0	0
ADAM22	53616	37.5612	10.2916	106.965	7.6305	35.6451	2.5773	0.6076	7.3414	10.6117	31.25	0.5382	4.6669	18.5035	13.0751	82.8176	56.4952	0.5103	67.706	39.1007	2.2216	69.2928	0.5133	7.4885	0	3.4924	40.2891	17.2526	10.3806	6.7961	10.6818	59.2321	37.7907	4.8864	0	14.4033	7.9771
ADAM23	8745	286.881	4.0023	27.2274	3.2702	20.6638	0.8591	4.2534	5.2438	18.7266	2.4038	1.0764	3.3941	17.1158	5.8111	13.5029	1.5989	8.1643	18.7082	27.3705	23.3269	14.7129	0	3.4562	0.4885	2.3283	3.3179	16.207	6.3437	22.8155	8.9952	1.0484	3.876	14.0077	5.629	13.1687	360.464
ADAM28	10863	686.445	1053.17	1515.01	345.006	343.536	1679.55	157.983	605.139	1539.33	50.4808	740.043	22.0619	188.273	55.6901	226.398	187.074	154.612	2060.13	67.4487	84.7913	121.974	630.39	198.157	52.2716	52.3865	83.8962	131.225	1480.97	291.748	1121.03	144.149	372.577	321.85	495.731	461.317	297.146
ADAM29	11086	2.7218	0	0.4862	0.545	0.5166	0	0	0	5.618	0	0	0.4243	0	0.4843	0.9002	0	0	1.3363	0	0	0	0	0	0	0	0	0.5228	0	0.9709	1.1244	0	0	0.9773	0.7505	0	0.4986
ADAM30	11085	0	0	0	0	0	0	0	0	0	0	0	0	0	0	0	0	0	0	0	0	0	0	0	0	0	0	0	0	0	0	0	0	0.3258	0	0	0
ADAM32	203102	5.988	3.4305	7.2931	0.545	11.8817	2.5773	83.8523	0	1.8727	9.0144	0.5382	0.4243	64.2998	2.4213	4.0509	30.9125	4.0822	4.4543	1.4663	6.6648	76.8866	4.6201	2.8802	0.4885	4.6566	9.0058	5.2281	1.7301	9.2233	2.2488	0.5242	7.2674	11.7273	0.3753	4.1152	2.4928
ADAM33	80332	228.873	25.1572	132.248	4.9053	36.6783	0.8591	55.9016	15.2071	327.447	6.6106	10.226	13.1523	20.3539	2.4213	55.3618	15.1684	5.613	29.3987	75.7576	14.222	56.0038	5.1335	13.8249	1.4656	9.3132	15.1677	26.6632	22.4913	19.9029	17.4283	34.0716	1.938	12.7046	5.629	78.6008	15.4556
ADAM3A	1587	0	0	0	0.545	0	0	0	0	0	0	0	0	0	0	0	0	0	0	0	0	0	0	0	0	0	0	0	0	0	0	0	0	0	0	0	0
ADAM5P	255926	0	0	0	0	0	0	0	0	0	0	0	0	0	0	0	0	0	0	0	0	0	0	0	0	1.1641	0	0	0	0	0	0	0	0	0	0	0
ADAM6	8755	377810	15693.7	51610.7	33639.7	13901.9	105.61	8845.44	4204.06	343451	44.6214	1175.4	2799.72	54290.8	1020.39	15435.6	3369.55	1155.19	325.599	111900	4949.35	38003.1	286.073	219.902	284.172	440.198	10094.8	29767.4	1730.29	1293.58	1221	1144.25	2384.5	1959.82	179.101	11927.3	5716.25
ADAM7	8756	0	0	0	0	0	0	0	0	0	0	0	0	0	0	0	0	0	0	0	0	0	0	0	0	0	0	0	0	0	0	0	0	0	0	0	0
ADAM8	101	1875.88	152.087	1457.15	306.854	716.518	439.003	229.683	182.486	2162.92	124.399	402.583	1296.99	372.846	320.097	171.486	761.087	524.557	432.962	807.918	3150.24	383.958	435.318	200.461	193.454	51.2224	1271.71	517.579	257.209	248.544	3430.56	157.778	121.609	537.177	89.3142	537.86	784.744
ADAM9	8754	3759.39	5112.64	8583.44	3588.5	4194.76	4170.96	686.617	4557.94	189.763	1463.34	1863.83	4355.96	2677	3286.2	1770.23	4148.67	2057.92	5518.04	2054.74	4487.27	2447.08	3227.41	2817.97	3063.51	1881.26	6398.39	2865.51	2690.89	4612.14	6281.48	1966.71	3292.15	8048.86	4118.59	4586.42	7189.33
ADAMDEC1	27299	32.6619	60.6061	24.3102	30.5219	236.084	62.7148	14.583	103.828	611.111	4.8077	57.0506	6.364	345.091	2.4213	30.1564	18.1211	0.5103	25.3898	32.2581	91.4561	89.2264	11.2936	27.6498	7.8163	5.8207	20.3816	94.1053	20.1845	32.5243	11.8062	32.499	6.7829	2.2803	2.2516	195.062	273.214
ADAMTS10	81794	614.589	554.603	453.628	45.7828	1709.41	524.914	655.02	85.4746	612.984	261.418	435.953	911.328	2407.31	806.78	545.516	402.395	87.7663	1590.65	740.958	793.113	432.843	474.846	135.369	110.894	96.624	1927.24	657.692	410.035	721.845	878.722	1176.78	654.554	488.313	578.666	323.457	419.793
ADAMTS12	81792	275.449	150.943	275.678	31.0669	54.7591	10.3093	9.722	184.059	6.8664	3.0048	11.3025	64.4888	34.6941	32.9298	153.032	135.375	22.4518	138.085	64.0274	303.619	113.431	11.807	6.9124	4.8852	5.8207	68.7285	28.2316	18.4544	138.35	129.869	84.3926	124.031	86.652	39.0281	82.716	142.091
ADAMTS13	11093	107.24	114.351	118.148	79.0298	114.684	152.062	258.849	189.827	169.788	233.173	447.793	267.289	213.716	169.976	101.272	199.865	139.304	130.067	144.673	159.215	307.546	259.24	286.866	90.3762	59.3714	79.6303	321.527	108.42	139.806	102.321	50.8452	73.6434	245.623	123.464	118.93	54.3438
ADAMTS14	140766	267.828	32.5901	272.274	76.8497	22.7302	10.3093	26.7355	39.8532	69.2884	10.2163	8.0732	302.503	25.9049	46.9734	72.9155	48.5006	2547.26	61.9154	56.696	90.7155	53.1561	20.5339	25.3456	64.9731	22.1187	27.9654	33.9825	38.0623	60.6796	128.744	33.0232	57.655	56.0306	4.8785	53.0864	63.8165
ADAMTS15	170689	32.1176	23.442	35.0067	3.2702	24.7966	1.7182	2.4305	20.451	6.8664	1.2019	3.2293	13.1523	32.3812	1.4528	20.2543	5.8627	3.0616	49.4432	10.7527	48.1348	40.8163	3.0801	0.576	8.7934	2.3283	56.8788	12.5474	11.534	25.7282	21.9259	22.0155	10.1744	4.8864	301.342	123.457	3.9885
ADAMTS16	170690	25.5852	2140.65	42.7859	3.2702	316.673	406.357	1144.16	184.059	9.3633	2935.1	13.9935	2.5456	145.253	666.828	83.2677	215.854	4.0822	31.1804	57.1848	29.9917	531.087	61.6016	877.304	219.834	3.4924	13.7457	425.565	348.904	110.68	76.4595	3758.88	15.0194	2.6061	1.5011	104.115	2.4928
ADAMTS17	170691	51.1704	5.7176	22.3654	17.9861	13.4315	8.5911	6.0763	18.3534	94.2572	16.8269	8.6114	15.2737	18.0409	22.7603	5.8512	16.5222	5.1027	42.7617	78.2014	32.2133	19.4589	24.6407	25.9217	0.4885	209.546	4.2659	13.593	39.2157	7.767	17.9905	1.5725	51.8411	22.4774	6.0043	3.7037	3.9885
ADAMTS18	170692	35.3838	5.1458	4.3758	2.1801	7.2323	2.5773	1.8229	3.1463	3.7453	0	0	7.2126	5.0885	166.586	12.6027	1.0659	71.4377	8.0178	12.7077	35.9159	2.8477	2.5667	0	1.4656	1.1641	1.422	5.7509	4.6136	2.4272	0.5622	2.6209	1.938	0.3258	53.6636	13.1687	2.4928
ADAMTS19	171019	0	0	0	0	0	0	0	0	1.2484	0	0	0	0	0	0	1.0659	82.6636	0	0	0	0	0	0	0	0	0	0	0	0	0	0	0	0	0	0	0
ADAMTS1	9510	2936.85	816.467	1762.98	979.425	2285.42	240.55	1585.9	894.599	374.532	1163.46	192.142	795.503	970.51	459.564	2519.19	294.202	336.778	587.973	1245.85	2453.39	2325.58	101.129	335.253	422.57	301.513	1127.15	858.973	1794.12	1915.53	1347.6	677.762	565.407	400.684	702.13	4805.76	512.028
ADAMTS20	80070	0	0	0	0	0	0	0	0	0	0	0	0	0	0	0	0	0	0	0	0	0.4746	0	0	0.4885	0	0	0	0	0	0	82.8201	0	0	0	0	0
ADAMTS2	9509	1036.47	451.115	646.651	111.187	205.605	40.378	91.1439	554.798	44.9438	13.2212	82.8848	156.131	245.634	43.0993	330.82	178.546	82.1533	542.093	266.373	535.037	801.139	35.9343	56.4516	10.2589	121.071	268.752	434.453	160.323	149.029	332.824	137.335	182.655	372.995	139.976	268.724	246.791
ADAMTS3	9508	60.4246	15.4374	10.2103	11.9907	10.8485	1.7182	6.0763	16.2559	31.211	2.4038	3.7675	11.031	18.9661	5.3269	18.904	6.9287	4.0822	18.7082	33.7243	20.735	27.5273	2.0534	6.3364	1.4656	3.4924	49.7689	15.6842	11.534	16.9903	21.3637	8.3868	42.6357	8.7955	11.6334	17.284	26.9226
ADAMTS4	9507	390.855	259.577	690.41	1096.06	187.008	125.43	229.075	683.272	164.794	66.7067	176.534	203.224	253.961	349.152	1068.98	347.499	297.487	740.312	608.504	682.033	831.514	139.63	412.442	585.735	103.609	1693.09	488.825	754.325	307.282	1896.31	138.383	509.205	191.221	466.836	2901.65	401.346
ADAMTS5	11096	62.0577	108.633	95.296	197.847	79.0391	97.9381	21.2669	234.924	24.9688	19.8317	62.4327	61.0946	50.4221	64.4068	191.291	84.7428	166.858	207.572	64.0274	211.053	104.414	33.3676	163.595	126.527	199.069	96.2199	38.6878	122.837	110.68	264.235	80.7234	119.671	93.493	114.082	94.2387	131.622
ADAMTS6	11174	105.063	44.5969	30.6308	51.2331	28.4128	8.5911	7.2915	25.6948	141.698	16.8269	65.1238	28.8502	42.5581	66.3438	20.7044	13.3243	117.362	121.604	29.3255	35.9159	24.6796	53.9014	20.1613	4.8852	25.6112	120.393	28.2316	35.1788	65.534	21.9259	45.0793	47.4806	25.0835	6.3796	39.0947	212.389
ADAMTS7	11173	377.79	254.431	438.556	179.316	88.3379	119.416	65.6236	173.047	186.018	43.8702	51.1302	179.041	83.7285	94.431	113.874	198.799	116.341	177.728	349.951	246.598	129.094	73.922	233.295	135.809	67.5204	66.3586	95.151	90.5421	150.971	231.627	59.2321	165.213	172.327	243.925	90.9465	293.157
ADAMTS8	11095	54.4366	12.0069	50.079	2.1801	37.7115	1.7182	37.0652	17.3047	15.6055	4.8077	1.0764	15.2737	28.6805	2.4213	9.0019	7.4616	1.0205	30.2895	11.2414	3.3324	25.6289	0.5133	8.0645	35.6619	2.3283	15.6417	13.0702	12.6874	4.3689	21.9259	25.6847	15.0194	5.5379	9.3817	110.7	0
ADAMTS9	56999	639.086	1255	1294.27	455.103	361.617	120.275	624.639	1273.73	264.669	1283.65	439.182	951.209	1477.51	439.225	1123.89	3006.5	194.923	336.748	695.015	2282.7	1195.06	460.472	441.244	386.908	73.3411	1707.31	628.415	1112.46	912.621	847.801	733.849	406.977	371.692	172.999	578.189	298.143
ADAMTSL1	92949	219.924	67.4671	149.751	34.3371	38.2281	19.7595	66.2312	94.3891	61.1735	12.0192	23.6814	48.7908	80.9529	25.1816	146.731	15.9892	121.444	85.078	98.2405	89.975	128.619	7.7002	33.4101	12.7015	41.9092	38.3932	115.018	82.4683	17.4757	119.749	64.998	89.1473	106.198	392.907	62.963	1794.34
ADAMTSL2	9719	2265.65	960.549	1175.15	283.962	596.151	411.512	1343.46	841.112	862.672	207.933	442.411	903.267	1746.73	568.039	543.265	911.385	526.087	1814.7	1851.91	640.192	1249.64	533.368	1134.79	491.939	853.318	555.99	1741.47	739.908	972.816	966.425	551.435	1290.21	1019.95	974.951	658.025	694.503
ADAMTSL3	57188	258.574	36.0206	120.092	9.2656	134.315	68.7285	11.5449	1339.8	36.2047	6.0096	185.684	453.118	156.817	7.2639	1014.07	1033.97	12.2465	182.628	392.473	254.004	142.857	70.8419	27.0737	377.626	491.269	706.245	100.379	59.4002	204.369	711.186	1280.57	490.795	58.9625	120.837	361.728	63.318
ADAMTSL4	54507	328.797	100.629	354.443	83.3901	173.576	221.649	842.777	308.862	191.011	635.817	156.62	819.262	735.053	399.031	301.114	1770.01	97.9717	864.588	231.672	1652.5	2835.79	300.821	176.843	674.157	1932.48	632.302	1549.6	502.307	135.437	667.334	2867.78	1077.52	1817.41	69.8002	373.663	394.366
ADAMTSL5	339366	163.854	261.864	108.424	209.838	41.3277	30.9278	34.027	161.51	85.5181	387.019	442.949	157.828	38.3948	232.93	180.938	11.7254	15.3081	182.628	123.167	28.5106	13.289	510.267	284.562	60.0879	89.6391	341.747	142.204	36.3322	338.349	47.225	344.909	61.531	106.198	3.7527	175.309	73.7879
ADAP1	11033	974.344	1778.28	1888.67	2388.1	1246.13	1912.98	2345.65	663.262	281.791	2586.81	1098	964.272	121.198	2085.08	2537.41	602.351	1118.42	714.232	922.214	420.942	1188.57	1211.39	1787.11	2023.31	143.749	504.325	1019.85	1316.82	819.636	533.996	238.255	39.3459	2129.92	651.656	1692.65	274.501
ADAP2	55803	227.545	133.791	302.905	208.203	338.887	141.753	105.119	230.204	262.172	42.6683	162.54	66.6101	195.212	101.695	272.308	109.26	33.6778	198.218	388.563	149.958	134.314	146.817	229.839	217.88	40.7451	207.133	178.277	113.033	167.961	174.283	223.3	205.426	140.077	115.958	172.839	419.793
ADAR	103	5652.15	5694.68	5385.68	7617.39	9470.75	19650.3	5149.02	5803.36	6898.25	6104.57	5566.2	22991.5	11167.3	8126.88	7946.89	16920.9	9207.3	12371	19715.5	8766.82	7500.71	7177.62	4354.84	6355.64	13688	5780.31	8615.87	7194.35	6673.79	13848.7	9198.79	9257.27	18549.1	5203.49	8670.78	5307.24
ADARB1	104	579.205	343.053	246.505	347.731	258.298	96.2199	287.407	282.118	1052.43	109.375	64.0474	220.619	260.437	184.504	315.517	126.315	216.354	274.833	336.266	399.519	413.384	106.263	292.627	230.581	174.622	171.584	374.853	258.939	225.243	374.427	121.609	169.089	257.024	330.613	257.202	197.432
ADARB2	105	10.343	10.8634	9.2379	0.545	38.7447	37.8007	21.2669	29.8899	0	0	0	94.6118	8.7892	1.937	1.8004	13.8573	16.8389	13.363	41.0557	24.0674	11.8652	2.5667	11.5207	112.36	26.7753	7.1098	5.7509	0	24.7573	74.2107	0	23.2558	331.297	38.6528	6.5844	0.9971
ADAT1	23536	154.6	168.668	207.123	319.39	231.435	226.804	28.5584	416.885	71.7853	76.3221	235.737	221.468	416.329	138.983	246.202	437.572	161.245	146.548	196.97	192.909	258.187	37.4743	47.235	126.527	146.682	493.897	205.463	136.101	226.214	130.431	334.425	175.872	267.449	233.042	295.473	172.504
ADAT2	134637	124.66	26.3007	108.91	151.519	119.334	37.8007	20.0516	37.7556	541.198	122.596	183.531	252.864	128.6	124.455	125.127	53.8303	767.955	89.9777	176.442	71.8319	175.605	167.351	31.682	73.278	251.455	94.324	105.607	71.511	99.0291	222.632	46.6518	55.2326	102.288	140.351	138.272	229.341
ADAT3	113179	101.252	84.048	76.8202	67.0391	45.4604	91.9244	271.609	53.4872	151.061	227.163	46.2863	56.0034	30.0682	71.6707	48.6103	24.5168	42.3523	101.559	198.436	81.0886	102.515	88.2957	69.7005	53.2487	48.8941	47.873	110.835	54.7866	95.1456	154.043	92.7795	54.7481	50.8185	39.4033	55.5556	107.69
ADC	113451	182.363	84.048	242.616	69.2192	183.908	68.7285	241.227	109.596	157.303	69.1106	40.366	75.5197	61.9868	203.39	166.986	17.5881	14.2875	138.085	137.83	41.8402	99.6678	92.9158	175.691	52.2716	24.447	91.006	178.8	57.0934	71.3592	73.6485	131.569	64.9225	78.8338	72.4271	44.4444	147.077
ADCK1	57143	219.924	97.1984	207.123	148.249	119.85	107.388	201.732	86.5233	383.895	104.567	148.547	106.916	186.423	81.8402	94.07	166.288	334.737	77.0601	128.543	228.825	96.8201	114.476	161.29	253.053	287.544	80.1043	116.586	123.991	165.534	132.118	107.981	90.1163	64.8261	300.966	107.819	213.387
ADCK2	90956	579.75	1257.95	469.673	1462.32	1163.37	451.031	1036.06	1017.3	1189.14	1063.1	1003.77	521.426	654.562	812.106	935.803	729.641	659.803	733.63	720.43	420.994	962.981	1060.57	1888.82	1205.67	608.847	1486.43	838.06	792.388	482.524	1041.76	560.87	1443.31	688.981	520.124	907.819	780.755
ADCK4	79934	684.812	901.086	832.867	707.998	1080.2	846.22	2034.33	778.71	993.134	1243.99	907.966	721.256	1180.99	1256.17	1106.34	1304.19	730.705	883.742	788.856	1077.85	1624.11	970.226	1475.23	1181.73	554.133	2714.07	1453.4	736.447	1181.07	1028.27	1392.74	1435.56	879.225	870.25	1217.28	406.332
ADCK5	203054	189.984	248.142	193.995	891.13	162.211	241.409	560.231	177.242	613.608	356.971	386.975	166.737	169.77	421.308	237.2	114.589	674.066	167.483	285.435	182.172	173.707	265.4	266.705	176.356	115.25	183.908	266.632	298.155	250.485	321.58	167.737	136.628	789.315	176.001	439.506	174
ADCY10	55811	0	2.287	1.9448	3.2702	7.7489	9.4502	2.4305	7.3414	0.6242	9.0144	2.6911	3.8184	42.5581	18.8862	9.9021	3.1978	2.0411	6.6815	45.9433	11.108	11.8652	2.5667	1.1521	4.8852	36.0885	2.3699	18.2983	10.9573	13.5922	4.4976	23.588	24.7093	4.5606	3.3774	4.1152	0
ADCY1	107	113.228	312.178	80.2237	39.7874	140.514	63.5739	71.0922	127.425	31.8352	63.101	48.9774	282.987	107.32	48.4262	120.626	473.281	54.5988	50.3341	174.976	677.96	130.992	41.0678	766.705	137.763	540.163	15.6417	32.4141	59.4002	52.9126	202.393	23.588	96.4147	30.2956	969.322	72.428	19.4441
ADCY2	108	15.7866	6.2893	154.127	6.5404	21.1804	4.2955	17.0135	1.0488	3.1211	0	1.0764	2.1213	5.5511	9.201	3.6008	4.7968	0	6.2361	10.2639	1.4811	0	2.0534	7.4885	0	1.1641	1.422	3.1368	1.7301	2.9126	0.5622	4.7176	175.872	1.6288	5.2538	3.7037	1.9943
ADCY3	109	1012.96	486.021	668.336	814.154	927.124	456.744	342.306	1366.9	1008.71	145.956	1299.9	447.094	459.207	483.225	1762.07	458.645	330.175	368.013	496.711	413.374	457.627	185.606	654.821	631.754	112.841	556.497	726.399	216.615	694.282	700.009	591.493	758.905	371.991	562.514	745.601	823.024
ADCY4	196883	479.586	162.95	105.993	187.492	165.311	64.433	339.663	113.267	588.015	42.0673	100.646	104.37	151.266	47.9419	222.347	52.2314	994.004	106.013	323.069	166.25	188.894	34.3943	154.954	36.639	40.7451	42.6591	262.972	243.368	263.592	121.998	112.174	134.205	62.5458	163.993	136.214	140.596
ADCY5	111	195.972	47.4557	137.596	8.7205	153.946	1471.65	150.691	22.0241	104.245	460.938	130.786	285.957	482.942	421.792	306.515	456.226	4.0822	301.114	510.753	512.45	369.245	133.984	16.129	142.159	26.7753	7.1098	493.53	370.819	442.718	92.2011	859.127	468.508	172.653	81.8088	203.704	42.3782
ADCY6	112	857.376	1740.42	1038.05	482.354	1865.43	1773.2	1109.52	680.65	397.628	1407.45	1458.02	1829.44	2320.34	2926.39	1575.33	1889.92	943.998	2081.51	1907.62	4453.58	2782.15	2447.64	2129.61	1292.13	880.093	997.749	1228.07	1813.73	2424.76	2633.92	2670.69	1530.04	1876.37	1589.27	1171.19	606.756
ADCY7	113	1016.33	536.307	576.152	389.699	1046.62	408.076	298.344	535.396	1823.97	232.572	667.384	218.074	933.503	402.421	1074.38	586.271	298.507	262.806	782.991	677.219	882.297	251.54	167.627	238.398	91.9674	499.111	670.762	386.967	190.291	302.465	505.832	593.023	790.618	129.468	820.576	933.317
ADCY8	114	4.8993	22.2985	0.4862	0	32.5455	57.5601	222.999	51.914	0	12.6202	0	0.4243	0.9252	2.4213	0.4501	0	0	0	0	5.554	0.4746	0.5133	70.8525	0	0	13.7457	3.1368	3.4602	4.8544	0	111.65	1.938	0.3258	0	4.1152	0
ADCY9	115	718.019	1672.96	509.055	872.598	1462.48	2088.49	757.709	1824.33	199.126	1629.21	3344.46	1103.1	2073.32	617.433	2047.04	755.757	145.427	2416.48	717.009	605.758	1737.54	1463.04	4388.82	738.642	1627.47	1706.84	1493.66	2689.73	869.418	1329.61	1037.87	506.783	928.089	1354.35	1219.75	626.698
ADCYAP1	116	421.339	16.5809	281.512	3.2702	6.1991	0	3.0381	0.5244	19.975	0	0.5382	0.4243	8.3266	0.9685	22.9549	5.8627	0	4.4543	2.4438	0	15.6621	0	0.576	0	1.1641	3.3179	13.593	2.3068	0.4854	1.1244	0	3.3915	3.9091	15.3861	39.0947	1.9943
ADCYAP1R1	117	0	0	0.4862	0	0.5166	0	0	0	0	0.601	0	0.4243	14.3402	0	0	0	0	0.4454	0	3.7027	0.9492	0	0	0	0	0	0	0.5767	0.9709	0.5622	0.5242	1.4535	0	208.275	0.4115	0
ADD1	118	5440.39	6868.5	5875.29	4608.26	7059.28	5458.76	4472.13	5008.39	6428.84	5608.17	2449.41	4823.08	5836.01	5447.46	4971.76	5077.64	2500.83	5020.49	5810.85	3888.92	5636.45	4236.65	4949.31	3505.13	6530.85	5813.01	4897.14	4722.03	4893.69	5747.95	3785.09	8419.57	6975.49	4932.92	3702.47	5661.22
ADD2	119	59.8802	12.0069	17.5033	3.8152	15.4979	2.5773	7.8991	8.9145	84.2697	0	8.6114	4.6669	42.0955	0.9685	15.7533	6.3957	25.5135	12.4722	15.1515	2.9621	12.3398	7.7002	3.4562	3.4196	1.1641	303.353	13.593	20.1845	35.4369	5.622	4.7176	113.372	2.2803	2.6269	7.4074	16.9513
ADD3	120	2507.89	786.735	1374.01	15580.3	1370.53	1314.43	848.853	1073.41	2186.64	2605.77	2742.2	1477.3	549.092	3064.89	2191.52	229.179	3296.85	1272.16	2536.17	855.688	5327.48	1127.82	300.691	372.741	263.097	370.66	1181.54	8908.88	1292.23	2285.35	2242.43	479.651	1741.51	4354.63	2491.36	806.681
ADH1A	124	27.7627	58.319	3.4034	6.5404	35.6451	1.7182	970.986	3026.22	3.1211	229.159	1575.35	546.033	30.9934	912.339	176.883	7.9946	63.7836	4.0089	1154.32	2912.52	1714.76	23.1006	9.2166	2.4426	1880.09	2.3699	9495.71	2732.41	95.6311	18.5527	9.4352	353.682	1.6288	347.481	711.111	25.9255
ADH1B	125	2262.38	586.049	161.42	9.8106	400.362	12.0275	628.893	16704.2	1519.97	686.899	5454.25	8926.18	624.957	450.848	406.887	49.0336	356.678	321.604	1361.19	11112.8	8147.6	56.4682	14.4009	2.4426	1807.92	9.9538	23852.6	9763.55	89.3204	112.44	114.271	1262.11	47.8866	713.388	4932.1	66.8079
ADH1C	126	360.914	134.934	171.144	627.879	189.591	1.7182	6350.3	5941.79	6.8664	14107.6	2076.43	147.645	12.0273	27.1186	103.522	17.5881	204.108	3.118	27468.7	2808.85	2274.8	33.8809	43.7788	1.9541	261.933	17.0636	6713.89	1363.32	246.117	540.838	98.5454	435.562	33.5532	1914.25	991.769	80.7678
ADH4	127	1.6331	60.0343	1.4586	1.0901	97.12	0	6.0763	5133.19	0	214.543	2618.41	6.7883	0	8.2324	6.7514	28.7806	273.504	0	0	4202.54	4175.61	1.0267	2.3041	1.9541	43.0733	0	13262.6	5739.91	0.9709	10.6818	0.5242	782.461	0.6515	4.128	1580.66	23.4326
ADH5	128	2508.44	2851.34	2229.73	1731.03	1870.59	2067.01	2812.7	1929.21	1357.05	4467.55	1892.9	2790.84	2337.46	3713.8	2346.35	1316.98	1687.46	2875.72	3174.49	2638.16	2860.47	1995.89	1759.22	1816.32	1462.17	996.801	2793.88	3231.26	2297.09	2397.23	1878.13	1828	3050.09	3263.35	1449.79	2864.76
ADH6	130	34.295	173.814	4.3758	86.6603	57.8587	107.388	2057.42	1169.9	1.2484	2935.1	491.927	212.558	25.4423	1157.38	162.484	144.969	133.18	12.0267	1137.83	922.336	1290.93	23.614	109.447	170.982	483.12	1.422	2538.75	1247.4	220.874	43.8518	51.8936	209.787	6.8409	2458.02	352.675	30.9111
ADH7	131	0.5444	0	0	0	0	0	0	0	0	0	0	0	0	0	0	0	0.5103	0	0.9775	0.7405	0	0	0	0	3.4924	0	0	0.5767	0	0	0	0.4845	0	0.3753	0	0
ADHFE1	137872	100.163	294.454	88.9753	9.8106	83.6885	18.0412	92.9667	210.278	265.918	28.2452	63.5091	126.856	177.634	407.748	131.878	425.313	61.7426	137.194	80.6452	113.302	134.314	108.83	156.682	109.917	119.907	202.868	215.919	505.19	79.1262	50.036	178.745	220.93	252.789	4.5032	114.403	37.8911
ADI1	55256	1517.15	1998.86	1546.13	2237.91	1740.93	1204.47	2630.41	3122.71	1398.25	2020.43	1770.72	1327.96	2223.2	2988.38	2337.35	2190.52	1749.71	1299.78	3087	2267.89	2758.9	1523.61	3585.25	2796.29	6518.04	1148.48	2560.19	3094.58	2231.07	1919.36	1698.86	1980.14	1025.16	3822.87	1462.14	1576.47
ADIG	149685	0	0.5718	0	0	0	0	0	0.5244	0	0	1.0764	0	0	0	0	2.1319	0	3.5635	0	0.3703	0	3.0801	0	0.977	0	0.474	0	0.5767	0.4854	0	2.0967	0	0.6515	0	2.0576	0
ADIPOQ	9370	0	0	0	0	0	0	0	0	10.6117	0	0	0	0	0	1.3503	0	0	0	0	0	0	0	0	0	0	0	0	0	0	0	0	0	0	0	0	0
ADIPOR1	51094	2512.25	3365.35	2326.97	3035.29	3099.06	1922.68	1733.56	3069.74	1404.49	1733.77	2646.93	5194.31	3918.58	4079.42	2841	6044.46	3512.69	2742.98	3829.42	2937.33	2542.95	3270.02	2333.53	2564.73	8798.6	3221.71	2934	2254.33	2525.73	3512.64	3278.21	3549.9	4882.16	3870.16	4669.55	2691.26
ADIPOR2	79602	1860.1	1887.36	1989.55	2448.29	2010.59	2148.63	1192.77	2341.37	1328.34	3974.76	2734.12	1318.2	1957.21	1680.87	2273.43	2011.44	2348.77	2223.61	1679.37	2150.88	1924.06	1806.47	1094.47	1632.63	3309.66	1888.38	2114.76	1992.5	3410.68	1410.56	1453.54	3258.24	2742.57	3661.51	1820.16	1496.7
ADK	132	471.421	515.152	179.895	282.872	434.457	83.3333	168.92	604.615	196.005	276.442	573.735	731.014	661.038	294.431	378.53	318.718	143.386	368.374	226.784	564.658	293.308	193.532	466.014	662.433	552.969	548.88	430.793	479.815	263.107	202.393	123.706	278.585	713.739	405.667	425.926	410.819
ADM	133	604.79	356.775	2191.81	552.664	341.986	704.467	774.723	254.851	205.993	439.303	491.389	96.7331	228.519	230.993	351.075	200.931	259.217	880.624	144.184	194.39	310.868	341.889	461.982	863.703	356.228	2554.33	451.706	903.691	528.641	265.359	323.418	489.826	67.1064	634.581	372.428	298.641
ADM2	79924	344.039	214.408	1621.49	513.966	430.324	481.959	329.941	358.154	789.014	357.572	143.165	379.72	312.247	296.368	499.156	175.348	233.193	328.731	597.752	510.229	109.635	547.741	202.765	654.616	599.534	61.1447	238.4	197.232	464.078	374.989	128.423	550.872	200.016	43.9066	416.461	71.295
ADNP2	22850	329.886	568.325	493.497	494.89	518.662	788.66	291.66	787.625	356.43	383.413	701.83	355.537	548.63	842.131	549.117	1096.86	468.427	751.002	556.696	547.255	831.514	974.333	524.193	479.726	746.216	534.187	447	565.167	612.136	526.221	499.541	299.419	980.21	594.052	564.197	396.361
ADNP	23394	2291.78	2084.05	1343.87	2192.67	2589.18	2121.13	664.742	1850.55	1418.85	1852.76	1230.89	3257.53	2899.97	1900.24	2241.03	2658.47	2480.42	2342.98	2996.58	2825.88	3662.55	1881.93	979.839	1428.43	1471.48	1893.59	1752.97	2034.03	2226.21	2960.56	3099.99	1580.91	2842.58	3088.85	2778.19	1281.81
ADO	84890	821.448	485.992	519.266	1540.26	731.499	750	511.013	620.346	593.009	531.851	1277.72	1366.57	692.957	602.421	546.866	799.994	898.074	944.766	702.835	828.288	698.149	833.676	654.378	821.69	296.857	564.522	571.951	658.016	714.078	848.363	604.377	594.961	964.574	551.646	921.399	835.099
ADORA1	134	175.286	249.857	489.121	6.5404	243.316	4.2955	13.9754	38.8044	21.8477	260.216	1743.27	1299.96	108.708	1188.86	125.577	6496.95	3.0616	751.448	669.599	71.8319	29.9003	279.774	46.659	34.1964	9.3132	25.5954	35.5509	18.4544	49.5146	1608.46	59.2321	81.8798	626.435	49.5356	240.741	187.461
ADORA2A	135	237.882	94.3339	115.23	165.69	118.3	73.8832	209.631	91.2428	1384.51	91.9471	51.0764	47.0938	173.008	90.0726	121.076	45.8357	101.028	90.4187	172.532	112.88	126.721	83.1622	83.5253	93.7958	302.282	57.3528	258.664	95.6978	52.9126	53.4092	102.215	54.2636	43.9775	116.457	92.5679	136.607
ADORA2B	136	124.66	291.023	206.15	27.7967	281.028	1.7182	3.6458	96.4866	6.2422	103.365	57.5888	92.9147	52.7351	7.2639	153.483	143.903	105.115	338.53	80.6452	99.602	77.3612	210.986	62.788	115.779	10.4773	330.371	12.0246	45.5594	142.718	91.0767	198.663	212.694	68.4095	10.8828	58.4362	126.636
ADORA3	140	149.156	172.098	287.346	65.404	263.464	80.756	55.2939	88.0965	80.5243	23.4375	241.658	13.1523	136.926	13.5593	39.1583	64.4898	14.2875	94.8775	75.7576	35.5457	104.414	89.3224	86.4055	91.3532	24.447	258.324	66.9194	34.6021	38.3495	80.9571	169.834	95.4457	23.4547	52.913	71.1934	410.32
ADPGK	83440	1254.49	797.027	880.029	1149.37	887.656	832.629	741.303	687.881	2617.82	992.188	1727.13	1139.89	1082.29	966.838	797.335	1855.28	1661.95	854.343	1079.18	1014.53	908.258	947.32	824.268	712.145	435.39	1358.93	1050.32	877.163	759.223	964.177	916.472	808.139	713.087	664.239	929.239	937.744
ADPRH	141	454.546	101.772	211.985	333.56	318.74	116.838	215.707	93.3403	803.995	246.394	141.55	174.374	287.267	194.189	240.351	473.814	125.016	276.169	327.957	192.169	244.898	129.877	79.4931	815.828	138.533	95.272	258.79	115.917	268.932	387.919	221.727	301.841	186.334	333.99	292.593	288.171
ADPRHL1	113622	51.1704	2.8588	91.8925	99.1961	12.3983	35.2234	7.8991	9.4389	13.1086	67.9087	8.0732	148.494	5.5511	52.7845	41.4088	173.216	113.79	6.2361	69.8925	75.5346	2.8477	1.54	89.2857	112.848	20.9546	2.8439	42.8702	7.4971	52.9126	52.847	80.1992	46.5116	11.7273	156.112	11.5226	51.3524
ADPRHL2	54936	890.582	516.295	794.943	797.384	1078.14	861.684	1929.82	538.018	1119.85	1320.91	998.385	659.313	438.996	1072.15	814.673	345.367	633.754	373.274	1088.47	563.177	625.534	1760.27	1343.89	1403.03	530.85	574.476	941.053	585.928	660.194	368.805	1087.14	1413.28	379.51	421.053	1253.91	1046.49
ADRA1A	148	8.1655	2.287	0	1.6351	4.1328	0	2.4305	47.7189	11.8602	1.2019	11.3025	0.8485	0.4626	0	1.8004	0	1.5308	1.7817	3.4213	39.2484	46.037	0	0.576	0.4885	144.354	2.8439	46.5299	13.8408	1.9417	0	0	10.6589	0.9773	4.8785	25.5144	0.9971
ADRA1B	147	136.636	2.8588	2.9172	25.6166	22.2136	1.7182	21.8745	97.5354	68.6642	13.2212	45.7481	19.5163	24.9798	10.6538	7.6516	8.5276	12.2465	121.158	31.2805	68.8698	36.5449	28.2341	20.7373	54.7142	6.9849	8.0578	122.86	33.4487	19.4175	42.7274	24.1122	42.1512	21.8259	89.6895	105.761	91.2377
ADRA1D	146	8.1655	10.8634	13.6137	2.7252	2.0664	0.8591	0.6076	1.5732	7.4906	0.601	3.7675	3.3941	0	3.8741	3.1507	3.1978	22.4518	4.8998	9.2864	6.6648	1.4238	1.0267	1.1521	0	3.4924	2.3699	5.2281	1.1534	1.4563	3.9354	0.5242	0.969	2.9318	14.2602	9.465	4.9857
ADRA2A	150	177.463	970.269	1328.8	5460.14	180.809	2602.23	381.589	329.313	659.176	224.159	628.633	16.1222	88.8169	11.6223	617.081	1.5989	11.7362	250.334	222.385	170.693	217.845	133.984	156.682	9.7704	8.149	217.087	293.295	2674.16	146.602	13.4928	357.489	206.88	13.3561	26.6442	527.16	177.49
ADRA2B	151	25.5852	14.8656	8.2655	14.7159	16.0145	9.4502	28.5584	35.6581	49.9376	13.2212	14.5318	60.6703	6.9388	49.8789	27.0057	12.2584	82.1533	36.971	65.0049	27.7701	37.9687	17.9671	28.8018	21.9834	36.0885	7.5838	42.8702	17.8777	16.9903	92.7633	11.5319	21.3178	39.0911	46.1582	17.284	5.4842
ADRA2C	152	457.267	299.6	163.364	326.475	305.308	271.478	1529.39	80.7551	63.6704	2899.04	68.8913	1162.49	246.56	1892.98	633.285	386.406	6.1232	878.396	500.978	281.033	486.474	206.365	876.728	628.725	190.92	147.411	556.267	230.68	333.981	493.613	443.978	474.806	337.161	7.5054	335.391	141.593
ADRB1	153	4.8993	0.5718	17.5033	1.6351	4.6494	0.8591	0.6076	17.8291	31.211	1.8029	8.6114	0.8485	4.6259	0.9685	1.3503	0	6.1232	1.7817	1.4663	2.9621	5.6953	1.54	0.576	0	1.1641	1.896	7.8421	6.3437	1.4563	0	3.6692	1.4535	3.2576	1.1258	3.7037	2.4928
ADRB2	154	83.8323	14.2939	31.1171	9.8106	27.3796	2.5773	10.9373	29.3655	121.723	3.0048	11.8407	2.1213	27.2927	2.9056	13.0528	2.6649	12.2465	7.1269	17.5953	15.181	55.5292	6.6735	6.3364	1.4656	131.548	5.2139	53.8492	23.6448	2.4272	3.9354	7.3385	5.814	1.303	19.1388	32.9218	30.9111
ADRB3	155	3.2662	1.1435	5.3482	0	0.5166	0	0	1.5732	4.9938	0	0	0.4243	0	0.4843	0	0	0	0.4454	0.9775	2.2216	0	0	1.1521	0	0	0.474	1.0456	0	1.4563	0	2.0967	0	0	0	0.4115	1.9943
ADRBK1	156	3032.66	1659.81	3573.11	2114.18	2016.79	1933.85	2398.3	1885.16	12827.7	2126.2	2750.27	1611.37	2052.97	2373.37	1896.25	1396.39	7032.53	1406.24	2928.15	1385.17	2154.25	1876.28	2141.13	1716.66	1566.94	1886.01	6274.74	1194.92	1542.72	1852.46	2052.16	1321.71	3071.91	2011.45	1914.4	2612.49
ADRBK2	157	434.948	144.654	542.604	114.457	406.044	201.031	194.44	383.325	1375.16	102.163	155.005	342.384	260.9	202.421	356.926	278.745	384.743	351.448	685.728	1048.6	840.057	163.244	165.899	248.168	77.9977	210.452	380.081	68.0507	245.631	594.81	532.564	304.748	274.289	439.441	455.556	397.358
ADRM1	11047	2949.92	1996.57	2354.69	2883.23	3137.29	2044.67	4860.4	2370.74	3253.43	4490.38	2860.6	1648.71	2224.12	1731.23	1754.02	1756.68	2045.16	1328.73	2149.56	2509.3	1717.61	3113.96	3508.64	4798.24	3258.44	2521.63	2908.38	2270.47	2630.58	2103.2	2406.5	3342.05	2603.14	1327.7	3207.82	3447.09
ADSL	158	1047.36	1009.15	958.308	685.107	1140.64	782.646	797.205	1224.96	1216.6	934.495	1765.34	1016.55	597.201	800.968	942.95	1087.27	1761.45	1246.33	891.984	998.241	853.346	1270.02	1516.71	1624.82	756.694	628.51	1005.36	959.631	870.388	973.172	939.851	1610.95	589.95	555.024	886.831	1334.66
ADSS	159	1250.41	1923.38	1246.14	691.102	1218.13	2050.69	831.84	2201.89	868.29	1224.76	1835.31	2955.03	1397.48	2032.45	1405.2	1602.65	2218.65	1714.03	1948.68	2025.73	1364.97	1485.63	1089.86	3021.49	1401.63	1214.36	2351.59	751.442	1245.63	2062.72	1103.39	1623.06	1871.81	925.79	3073.25	1395.49
ADSSL1	122622	142.079	46.3122	223.654	234.909	39.2613	54.9828	15.7983	76.56	52.4345	252.404	194.833	74.2469	16.1906	34.3826	52.6612	433.308	414.339	175.501	25.4154	77.0156	38.9179	11.2936	302.995	233.024	3185.1	100.012	70.0562	220.3	80.5825	111.878	89.1102	46.5116	13.3561	62.67	64.6091	79.2721
AEBP1	165	12034.3	4688.97	17272.9	1279.19	4102.29	543.814	5698.31	4893.03	3445.69	593.149	1569.43	7338.57	5687.06	3057.63	4193.54	3094.45	2093.12	14983.5	10847	6276.4	10179.4	2016.43	5003.46	2003.91	442.375	7684.32	7022.35	4235.87	8310.68	13653.6	2806.45	2888.57	5834.03	2664.79	4108.64	3094.1
AEBP2	121536	711.486	560.32	679.227	546.668	616.815	511.168	319.611	433.141	455.056	344.952	484.392	587.611	647.624	515.254	528.412	688.602	749.585	734.076	580.156	749.792	586.141	597.536	180.876	336.102	270.082	577.32	388.969	608.42	693.204	604.929	629.537	629.361	1075.33	565.156	599.588	521.002
AEN	64782	514.426	618.067	578.096	513.966	826.036	1359.97	738.873	790.771	1043.07	302.885	1342.84	390.751	759.107	700.726	1603.69	1282.87	1504.78	505.568	591.887	815.329	1230.66	584.702	649.193	2086.96	785.797	1029.51	736.113	1119.95	1366.5	661.712	707.64	972.868	596.14	734.028	1081.48	678.051
AES	166	7871.53	14080.6	12694.8	6901.21	10564.9	13423.5	21759.7	7145.78	16725.3	18372	7255.11	9572.76	8346.48	12956.4	7644.42	7608.2	7454.52	7062.81	7632.45	8589.1	6392.03	13129.4	23544.9	11055.2	13448.2	13121	8195.01	7038.64	7354.37	8267.74	11166	10718	9626.84	5284.17	4518.93	10849.3
AFAP1	60312	1750.02	681.504	2113.02	674.201	1731.5	959.905	255.792	652.711	404.494	496.731	185.145	1261.32	462.764	989.671	718.024	1243.85	1694.14	1983.52	1238.65	1159.96	999.54	872.634	260.369	189.057	153.667	1693.52	530.174	441.165	363.471	1847.01	474.381	1002	1518.88	981.653	705.852	1124.16
AFAP1L1	134265	331.519	278.445	255.257	461.643	446.855	110.825	126.386	141.584	145.443	28.2452	48.4392	270.683	124.436	174.334	245.752	142.304	90.8279	248.998	426.197	275.479	165.164	89.8357	167.051	67.4157	164.144	128.925	186.119	200.692	277.185	209.701	355.392	220.446	118.576	424.055	269.136	347.002
AFAP1L2	84632	1165.49	244.711	456.546	243.63	760.429	59.2784	41.9262	207.132	335.83	36.6587	107.104	368.689	103.157	67.7966	264.656	92.2045	108.177	371.492	178.886	445.432	104.888	150.924	136.521	155.349	13.9697	216.139	138.544	69.2042	209.223	219.259	229.066	127.422	102.614	84.4357	213.992	214.384
AFARP1	246182	1.6331	0.5718	0.4862	1.0901	0	2.5773	0	3.1463	3.1211	0	0	0.4243	2.3129	0	0	2.6649	1.0205	0.4454	1.955	1.1108	2.373	0	5.1843	0	15.1339	1.896	1.0456	9.2272	1.9417	2.2488	0	3.876	0.9773	2.6269	1.2346	0.4986
AFF1	4299	1760.48	2893.08	2172.36	1891.81	1988.89	2794.67	1551.27	2218.14	900.749	2662.26	949.408	2040.31	3562.39	1876.03	3827.16	804.79	733.767	2557.24	2652.98	1070.81	3161.37	1173.51	752.88	878.847	739.232	1274.56	1759.25	2369.67	2025.73	3318.68	2034.33	1183.14	1555.18	7696.41	1221.4	977.689
AFF2	2334	25.0408	29.1595	15.0723	567.38	40.2945	445.876	28.5584	5.7682	81.1486	19.8317	101.722	3.3941	16.1906	4.8426	4.501	60.759	66.8453	7.1269	147.605	7.0351	6.6445	0	23.6175	0	5.8207	3.3179	6.2737	40.3691	9.2233	1.6866	19.9188	716.57	2.2803	0.3753	20.5761	174.997
AFF3	3899	47.9042	171.527	34.0343	5.9954	617.332	7.732	16.4059	1210.28	581.149	8.4135	143.165	801.018	2441.54	160.775	470.8	836.236	7.654	433.408	119.257	178.099	238.253	218.173	160.138	487.054	293.364	600.545	118.154	84.7751	600.485	272.106	566.636	2480.62	37.1366	1303.31	276.543	179.484
AFF4	27125	1864.45	2704.97	2515.62	1418.18	4279.99	4314.43	1275.41	4087.05	1009.36	1311.9	1622.71	2631.31	3000.35	2026.15	4691.35	2710.7	1172.6	2775.95	1969.21	3828.94	3125.77	1392.2	1023.04	1524.18	3052.39	2055.22	1702.26	2621.11	2870.39	2700.82	3410.82	2650.19	2857.56	3097.85	3047.33	1823.26
AFG3L1	172	284.703	264.151	209.068	452.923	216.97	200.172	226.644	178.291	809.613	595.553	419.806	244.803	560.657	503.632	228.198	317.652	625.08	121.604	406.158	273.257	294.732	148.871	287.442	198.339	420.256	274.44	325.186	275.087	400.485	156.854	310.313	207.849	307.517	240.923	232.099	165.026
AFG3L2	10939	877.692	3516.11	1232.38	1993.74	1349.53	1938.02	1433.83	1525.49	683.365	796.268	944.731	1288.54	2971.94	2272.77	2538.13	3129.03	877.188	1636.09	2221.77	1654.6	1394.01	2087.93	4347.04	1935.81	1761.46	2814.61	1589.29	2323.1	1726.77	1523.42	1426.57	2235.97	2366.99	2608.68	1637.64	1484.79
AFM	173	0	8.0046	0.9724	0	8.7821	0	0	1172.52	0	242.188	554.36	33.9415	0	20.8232	0.4501	2.6649	62.7631	0	152.004	777.192	922.164	1.54	0	2.4426	2678.7	0.474	2267.94	683.968	5.8252	7.3086	1.0484	182.655	0.3258	22.8915	243.21	4.9857
AFMID	125061	538.378	1062.89	329.646	536.858	722.717	530.069	749.81	951.757	409.488	1056.49	1444.03	970.301	1156.47	969.976	799.82	493.534	1384.36	606.236	985.826	678.7	1049.83	915.298	968.894	807.523	2013.97	866.927	1273.56	1114.76	566.019	889.966	565.588	922.481	685.398	521.25	556.379	545.93
AFP	174	0.5444	0	0	4.3603	0	0	0	11.0121	0	6.6106	2.6911	0.4243	0	2.9056	0	0	1.5308	1.3363	16.6178	384.338	7.5937	4.6201	4.6083	0.977	13.9697	0	42.3474	5.1903	0	2.811	2.0967	0.969	0.9773	3.0022	2.0576	29.4154
AFTPH	54812	1081.65	2164.67	1527.65	1859.11	1763.66	1422.68	1090.69	2733.61	1584.89	2171.88	2139.4	2077.64	2491.04	1969.01	2878.81	1554.68	1963.52	1849	1844.09	1508.84	2084.95	1705.85	2371.54	2022.96	1987.19	1648.06	1442.95	2652.25	2179.13	2479.87	1669.51	1416.67	1751.28	1686.46	1523.05	701.982
AG2	387763	1120.3	375.643	846.967	425.671	252.615	68.7285	1552.48	484.531	460.674	113.582	275.565	205.346	166.069	255.69	509.508	117.254	152.06	345.212	776.637	305.841	1028	121.663	472.35	297.02	88.475	1180.71	797.804	707.612	509.709	678.578	133.665	127.907	176.887	331.738	1879.42	229.839
AGA	175	438.214	400.229	610.186	505.791	234.018	384.88	301.382	245.936	529.338	167.668	223.897	336.869	327.512	267.312	422.64	443.434	543.437	289.532	195.015	499.861	392.501	381.93	188.364	236.444	115.25	170.636	335.642	282.007	383.981	502.609	209.147	495.639	578.875	261.188	323.868	499.564
AGAP11	119385	33.7507	4.0023	36.9515	9.8106	10.8485	2.5773	8.5068	6.2926	14.9813	4.2067	6.9968	14.0008	21.2791	10.1743	18.904	3.1978	27.0443	16.4944	31.2903	11.108	44.6132	4.6201	3.4562	3.9082	9.3132	4.2659	23.5263	6.9204	8.7379	11.8062	11.5424	8.2364	32.5792	169.258	11.9342	5.9828
AGAP1	116987	316.276	642.653	346.177	240.905	378.148	319.588	131.855	1097.01	38.0774	215.745	397.74	344.93	331.676	269.249	666.142	422.115	286.771	256.125	390.518	290.29	257.238	247.433	195.852	661.456	185.099	431.331	167.298	291.811	525.728	617.298	406.762	375	466.488	340.37	408.231	313.1
AGAP2	116986	247.322	79.1995	96.0739	72.811	188.878	27.079	59.2496	61.0855	1714.62	16.8269	45.8181	18.1502	229.425	18.6489	40.4366	37.8198	438.418	60.6414	103.211	45.5688	141.158	38.424	61.7684	42.2179	66.9499	69.6101	180.039	24.752	42.8447	44.3634	47.2022	30.2422	22.3536	332.827	133.416	129.518
AGAP3	116988	1862.82	1335.62	1393.46	1442.16	981.015	1242.27	1338.6	1564.76	1889.51	1970.55	2356.84	967.756	709.61	1388.86	1220.21	1056.35	2227.84	671.715	1517.11	936.777	840.532	1498.97	1163.02	1163.65	1011.64	1584.07	1402.69	1426.18	921.359	1572.48	977.067	1105.62	1304.34	929.918	1529.63	1954.88
AGAP4	119016	268.372	309.32	194.482	249.08	255.715	364.261	258.849	177.766	938.202	795.673	533.369	529.062	389.962	665.86	220.997	287.273	646.001	335.412	573.314	352.865	359.279	467.146	325.461	270.64	324.796	277.284	427.134	381.776	366.019	335.072	250.557	203.488	547.276	220.659	247.737	129.627
AGAP5	729092	32.6619	30.8748	26.4446	53.1898	37.5772	18.5052	40.1033	23.5868	69.2884	28.8462	52.2174	124.633	99.1049	76.7797	24.2286	56.2447	107.754	46.3252	51.8084	71.395	53.963	22.5873	12.6728	19.5408	71.7462	53.0869	46.0071	36.0842	68.1165	42.3394	28.6044	45.1599	140.184	20.1332	36.1193	19.2497
AGAP6	414189	166.576	114.351	79.7374	117.182	128.632	164.948	82.0295	118.511	381.398	310.697	296.017	176.071	260.9	300.726	87.7687	207.86	446.996	105.568	331.378	176.988	192.216	216.119	128.456	127.992	121.071	128.451	211.737	132.641	185.922	168.098	138.383	77.0349	265.82	157.989	173.663	60.8251
AGAP7	653268	8.1655	6.2893	5.3482	7.0854	9.2987	9.4502	6.6839	7.3414	85.5181	24.0385	109.257	10.6067	12.0273	21.7918	4.501	12.2584	21.4313	4.8998	100.684	51.4672	55.5292	15.4004	9.7926	7.8163	3.4924	7.5838	63.7825	9.2272	8.7379	7.3086	4.7176	23.2558	14.9849	3.3774	11.5226	5.4842
AGAP8	728404	21.7746	36.0206	8.7517	10.3556	29.9625	36.0825	25.5203	23.0729	55.5556	94.9519	45.2099	144.251	95.2932	54.2373	18.0038	15.9892	258.196	50.7795	81.6227	44.0618	22.3066	51.3347	13.8249	25.403	48.8941	10.9018	29.8	58.8235	49.0291	28.6723	46.1276	15.0194	80.7883	10.5076	106.173	18.9455
AGBL1	123624	0	0	0	0	0	0	0	0	0	0	0	0	0	0	0	0	0	0	0.4888	0	0	0	0.576	0	0	0	0	0	0	0	0	0	0	0	0	0
AGBL2	79841	21.2303	22.2985	18.4758	21.8013	28.9294	20.6186	30.9889	17.8291	69.9126	34.8558	59.7417	14.8494	16.1906	84.7458	15.3033	43.7038	44.3934	24.4989	15.1515	19.9944	23.7304	7.1869	20.1613	17.5867	64.0279	20.8556	23.0035	21.3379	64.5631	24.7369	90.1586	71.7054	23.7804	12.0086	10.6996	12.9627
AGBL3	340351	1.0887	24.5855	1.9448	23.9815	23.2468	15.4639	26.7355	19.9266	12.4844	39.6635	21.5285	7.6368	12.4899	120.097	44.5595	9.5935	3.0616	26.2806	20.5279	55.9104	28.9511	8.7269	24.1935	21.0064	16.298	11.8497	24.0491	34.6021	15.534	6.7464	54.5145	69.7674	28.9926	10.5076	16.8724	5.9828
AGBL4	84871	2.1775	0.5718	2.9172	1.0901	0.5166	0	4.2534	0.5244	3.7453	1.8029	1.0764	41.154	13.8776	2.9056	0.4501	0.533	5.1027	0.4454	0.9775	5.554	0.9492	2.5667	1.1521	0.4885	1.1641	0	1.5684	0.5767	0.4854	2.2488	0.5242	2.907	0	2.2516	2.0576	0
AGBL5	60509	634.224	909.691	581.991	829.001	1421.68	536.082	974.048	730.991	379.538	955.589	632.966	459.062	924.251	899.283	1963.77	828.774	1530.83	638.779	628.074	494.677	558.144	528.239	717.172	698.583	700.815	724.749	720.993	630.34	693.214	478.434	1252.8	1771.32	332.61	336.632	369.148	687.528
AGER	177	64.7795	76.6152	45.217	56.1384	74.9064	174.399	563.269	55.0603	991.885	667.668	93.1109	156.131	125.361	657.143	105.322	198.266	78.0712	92.6503	220.43	198.834	115.805	224.846	319.7	166.097	101.281	43.6071	371.193	201.269	275.243	193.96	111.126	174.419	103.917	85.5615	56.7901	41.8796
AGFG1	3267	1356.02	1633.5	1429.44	1541.9	1803.95	1861.68	1413.34	2350.29	1207.24	1394.23	1515.61	1905.81	2258.36	1484.26	1340.83	1796.12	1750.22	1317.15	1717.99	1452.56	2358.8	1228.44	1016.71	2259.4	1342.26	1564.17	1141.81	2201.27	2077.18	2448.95	2453.15	1484.98	1514.13	1993.06	1857.61	2010.72
AGFG2	3268	667.393	3332.76	1862.16	1743.56	1776.06	2221.65	3699.23	3291.56	860.175	2138.22	3750.27	1896.05	2067.31	2484.75	3416.68	3929.62	502.615	2270.38	1138.32	2325.65	3849.55	2934.8	4293.2	3845.14	2850.99	3066.71	2307.15	2704.73	2015.53	1844.58	1191.98	396.802	3535.79	3243.08	2051.03	936.308
AGGF1	55109	610.234	794.168	528.504	658.4	663.309	820.447	473.948	1249.08	544.944	626.202	796.017	715.74	846.536	885.714	660.29	821.313	679.678	1069.93	772.727	963.436	892.739	555.955	639.977	915.975	650.757	707.667	820.808	523.068	941.748	703.877	547.241	1029.07	785.732	899.146	872.428	504.549
AGK	55750	516.603	264.723	353.957	565.745	494.899	324.742	182.288	347.666	785.268	294.471	747.04	438.693	271.077	422.76	207.944	465.286	1141.47	536.303	810.362	360.641	480.304	599.076	175.115	391.304	334.109	249.319	400.993	347.751	332.524	582.441	483.816	649.709	502.321	639.835	497.119	624.704
AGL	178	421.884	420.812	550.869	818.095	445.822	390.034	309.889	676.98	479.401	681.49	619.483	462.877	704.059	479.903	891.639	243.569	469.958	512.249	538.612	590.206	658.756	534.394	311.06	286.273	480.792	357.862	498.236	588.235	571.359	662.274	725.462	795.058	231.615	978.703	841.152	307.616
AGMAT	79814	16.331	5.7176	34.0343	1073.72	39.7779	51.5464	74.1303	330.362	189.763	323.918	334.769	163.343	32.8438	292.494	115.675	174.282	60.722	65.9243	328.935	361.751	178.453	146.304	143.433	227.65	1033.76	11.3758	528.036	208.766	118.932	76.4595	74.9574	38.2752	111.084	230.04	153.498	78.7735
AGPAT1	10554	2624.6	2535.02	2011.93	1440.62	2829.97	3704.25	4218.27	2186.23	1293.51	2882.48	1293.07	2879.87	2200.39	2890.57	2293.68	3221.51	2254.73	2185.1	2278.98	4364.68	2006.4	2727.32	5085.52	4379.48	3761.41	1507.73	2125.01	1931.14	2202.32	2504.09	3504.08	3794.15	2071.53	2557.88	1560.95	2040.37
AGPAT2	10555	1851.39	5792.45	4875.17	3524.19	1982.69	3310.14	15503.6	2482.96	941.323	2733.77	5628.09	2252.02	1881.35	1966.59	1096.43	2272.07	2002.3	2351	813.294	3936.68	823.446	8448.67	9358.29	2565.22	5647.26	2696.05	2076.59	1607.84	1440.29	2040.23	1804.74	1915.7	3834.84	1151.33	1830.86	1837.72
AGPAT3	56894	1559.06	3806.18	1245.65	3920.97	3789.23	2165.81	2295	4661.25	1852.06	2847.96	3000	1926.6	3783.51	3041.16	1553.28	4580.38	1463.45	1102	1559.14	3297.23	2460.84	1343.94	3692.97	3812.41	2465.66	1254.18	2373.55	4095.73	2319.9	3813.98	2202.07	3201.55	2177.7	2628.76	1368.72	2238.07
AGPAT4	56895	359.826	195.54	247.478	59.4086	224.719	109.106	82.0295	106.45	94.2572	109.976	88.8052	812.898	215.103	36.8039	59.8627	55.4293	268.912	285.969	152.981	231.417	85.4295	262.834	100.806	54.7142	355.064	348.856	83.6492	59.9769	62.6214	416.029	28.3056	127.907	172.653	269.819	246.502	504.549
AGPAT5	55326	470.876	265.866	511.973	226.189	903.009	282.646	179.25	450.446	531.211	547.476	468.245	655.918	778.073	450.363	752.56	1080.34	456.691	533.185	603.617	686.476	407.689	279.774	225.806	301.905	585.565	593.909	294.863	504.614	537.379	925.385	463.897	711.725	429.351	893.142	494.239	1057.46
AGPAT6	137964	1611.87	3165.81	2156.31	1033.38	3762.37	3176.98	3723.53	2196.64	2572.41	2696.51	1474.7	1652.95	3700.71	2776.76	5698.21	2849.28	1155.76	4164.81	1722.39	2507.82	1339.82	3509.24	4245.39	3557.89	3693.83	2936.37	1816.23	1719.15	3176.21	2884.1	1882.85	8836.72	3544.91	2075.24	2381.89	3488.97
AGPAT9	84803	161.677	59.4626	237.754	93.7457	49.5932	40.378	40.7109	78.1332	38.7016	17.4279	61.3563	2.1213	75.8645	46.0048	299.764	18.1211	262.278	17.8174	50.8309	48.1348	99.1932	23.614	72.5806	48.852	159.488	48.347	75.2843	24.7982	55.3398	14.0551	132.093	47.9651	6.8409	1995.31	67.4897	716.939
AGPHD1	123688	56.0697	16.5809	17.0171	25.6166	25.8298	10.3093	18.2288	17.3047	13.1086	31.851	17.761	24.6076	33.7689	41.1622	78.3166	37.8411	56.6399	30.2895	21.0166	4.4432	26.5781	6.1602	9.7926	54.2257	93.1315	8.0578	42.8702	16.1476	9.2233	34.2943	37.2166	58.624	25.0835	40.5291	67.4897	13.9599
AGPS	8540	1061.51	907.376	1158.62	1643.82	1155.62	2144.33	495.215	1659.67	377.029	1228.97	1695.37	1281.29	1393.32	1018.4	2242.38	906.055	1239.44	1577.73	1024.44	1154.86	1373.52	878.337	1035.71	968.246	1265.42	918.592	1319.04	1182.24	1962.14	1761.38	1413.18	1460.76	947.634	1156.21	1346.91	1142.71
AGR2	10551	3408.82	7.4328	16282	6463.55	72.84	409.794	0.6076	1.0488	1.8727	6.0096	0.5382	359.355	0	39.7094	64.8138	0	18031.9	319.376	113.881	6.6648	160.418	0	0	1.4656	5.8207	0	7.3193	0	90.2913	292.907	0.5242	1354.65	187.963	13.885	2486.83	797.707
AGR3	155465	86.0098	0.5718	816.823	277.967	1.0332	0	0	0	0	0.601	0	7.2126	1.8504	1.937	0.4501	0.533	167.368	0.4454	60.1173	0.3703	4.2715	3.5934	0.576	0	0	0	0	0	0	5.0598	43.5067	0	8.144	9.0065	17.6955	0
AGRN	375790	8511.7	17907.4	17267.5	15302.9	20092.5	16457	9282.7	51102.8	720.35	12170.7	16934.3	16381	8629.12	25879.9	7456.73	18128	10996.8	14331.8	5816.23	47112.8	8004.27	13669.9	16229.8	14077.2	4952.27	23374.3	7411.32	12545	17458.7	12599.5	10180.6	15677.3	15910.7	10337.9	8740.33	7374.3
AGRP	181	0.5444	1.7153	4.3758	0.545	1.0332	1.7182	0	0	1.8727	0	0	1.2728	0.4626	0	0	0.533	0	0	2.4438	0	0	0	0	1.9541	2.3283	0.474	0.5228	1.1534	0.4854	1.1244	0	0.4845	0.3258	0.3753	0.823	0.9971
AGT	183	1816.55	21028	833.84	3323.07	6906.88	16720.8	21117.4	17507.1	29.3383	34040.3	55982.8	10690.3	11280.7	53291.5	39447.7	29084.4	412.808	7803.12	16947.2	11035.8	27752.7	47309.5	11114.6	29605.3	159619	17433.3	78074	19295.8	35493.2	6749.24	47714.3	4191.86	141097	12339.2	46198.8	9243.43
AGTPBP1	23287	309.2	171.527	463.352	123.723	270.696	88.488	72.3075	202.412	352.06	85.9375	341.227	213.831	273.852	238.741	252.504	122.051	336.267	375.056	215.054	294.363	139.535	172.485	84.1014	115.779	143.19	676.384	206.509	118.8	85.9223	228.254	233.783	101.26	389.283	392.532	346.091	360.962
AGTR1	185	34.8394	104.631	93.3512	2.7252	44.4272	114.261	270.393	512.323	11.236	1756.61	1154.47	38.1841	85.5788	803.39	1164.4	8.5276	39.801	65.9243	43.9883	366.195	319.886	325.975	131.336	36.639	1534.34	19.9076	1555.35	1502.88	978.641	7.8708	241.122	42.6357	48.2124	7.1301	245.268	199.925
AGTR2	186	0.5444	0	0.9724	5.4503	0	0	0	0	0.6242	0	0	0	0	0	0	0	0	0	0	0	0	0	0	0	0	0	0	0	0	0	0	0	0	0	0	0
AGTRAP	57085	1256.4	560.892	965.115	946.723	936.588	534.364	2277.99	473.519	911.985	850.361	437.567	402.206	583.324	479.903	597.727	565.485	764.894	1280.18	550.342	633.528	403.892	899.897	112.327	444.065	90.8033	1319.59	555.221	683.391	887.379	462.13	861.748	1486.92	673.67	499.859	825.103	2954.51
AGXT	189	2.1775	24.5855	0	11.9907	43.9106	0	29.7737	6129.52	0	562.5	2813.24	101.4	0.4626	11.138	9.9021	37.3082	211.762	0.8909	105.083	3476.81	2360.23	6.1602	33.4101	38.5931	73658.9	0	7821.72	2345.44	0	3.9354	28.8298	607.558	0.6515	19.514	1488.48	36.3954
AGXT2	64902	0	6.8611	0	821.91	5.6826	128.007	426.553	411.117	0	42.6683	207.75	0.4243	0	5.3269	0.4501	1.0659	5.1027	0	9.2864	362.492	182.25	0.5133	2.3041	0	23.2829	0	304.274	1403.69	123.786	1.1244	34.5957	50.3876	0.6515	57.4163	137.037	2.4928
AGXT2L1	64850	0.5444	4.0023	0.9724	0	1.0332	0	0	161.51	0	3.6058	110.872	0	0	2.4213	0.9002	2.6649	4.5924	0.4454	0.9775	197.723	51.2577	0	1.7281	0	396.973	0	246.242	123.414	0	0	0	26.6473	0	31.8979	129.218	22.4355
AGXT2L2	85007	495.781	845.42	601.804	632.86	655.798	966.486	812.663	697.782	2001.19	871.995	751.954	328.651	779.975	1074.39	1185.28	619.332	320.337	812.267	654.296	668.766	713.047	800.005	1082.63	641.934	1568.37	575.04	887.602	979.418	828.607	484.972	475.686	1178.42	600.974	774.819	511.663	376.154
AHCTF1	25909	1032.66	1108.06	933.025	1153.84	1205.22	710.481	487.923	1071.32	958.802	1101.56	975.78	2685.62	1733.78	1371.91	1046.92	2887.65	2025.26	1571.94	1565	1421.46	1861.89	1098.05	557.604	598.437	2334.11	985.899	1298.65	991.35	1103.4	1986.26	1374.39	1407.46	2615.2	1335.59	1876.54	1084.88
AHCY	191	3000	3431.68	1978.36	4887.31	5228.46	3469.93	5079.14	5281.59	1823.97	5046.88	9206.67	2599.49	5212.91	3847.46	5580.74	3000.64	7212.65	3581.74	4077.22	4837.55	4133.36	5868.07	6712.56	7625.31	4213.04	6118.73	5105.22	3908.3	4182.04	3103.36	5113.35	4284.88	2171.84	2527.44	4150.21	2254.52
AHCYL1	10768	2518.24	4150.94	3256.59	3391.2	3734.99	4262.89	1941.36	3914	1545.57	2024.04	4371.91	2072.13	3496.24	2327.84	2559.24	1392.66	2299.27	2820.49	2793.74	3167.27	2315.61	3381.93	2733.87	3568.64	1313.15	1795.47	2477.06	3121.68	2501.94	2206.64	3765.17	3460.27	1201.73	3498.26	3467.49	2371.18
AHCYL2	23382	505.171	205.26	790.568	270.337	332.688	229.381	113.626	317.777	442.572	173.077	319.16	931.693	301.145	444.552	304.265	508.99	593.443	590.2	532.258	292.882	642.145	250	127.304	216.903	374.854	300.036	250.425	366.205	178.155	645.408	437.164	231.105	430.328	962.942	561.317	210.894
AHDC1	27245	1014.7	394.511	1049.23	452.923	264.497	289.519	178.034	360.252	671.036	322.716	364.909	542.215	384.873	404.843	629.684	360.823	442.403	444.098	669.111	541.701	536.782	374.23	147.465	426.478	701.979	406.209	438.113	241.638	466.019	443.015	331.28	497.577	375.926	1883.48	456.379	461.673
AHI1	54806	218.291	137.793	302.905	202.752	229.369	105.67	106.942	61.3529	232.834	285.457	160.926	342.809	248.41	241.162	198.042	325.114	587.32	242.762	376.344	191.799	477.931	239.733	54.7235	132.877	317.811	168.266	267.155	276.24	222.33	345.754	260.516	181.202	275.918	660.85	202.881	454.194
AHNAK2	113146	4616.22	37.1641	6529.72	563.564	276.379	9079.04	2341.79	22.0241	119.85	292.668	49.5156	340.687	2472.53	2511.86	5314.73	2535.36	1542.03	7032.52	234.604	284.365	240.626	182.238	29.9539	717.147	1037.25	4494.85	952.555	61.707	4549.03	11240.1	1793.21	8946.71	624.155	614.317	4178.19	1181.6
AHNAK	79026	26996.2	14025.7	34955.1	7528	16583.8	8073.88	3671.88	19834.3	5750.31	5021.63	23854.7	32675.9	26135.3	23403.9	30470.1	8341.04	8083.17	20638.8	6506.84	14221.6	37312.3	8445.07	4636.52	12719.1	11754.4	23847.8	9196.18	3603.81	13635.9	37353.3	22760.3	11224.8	26803.2	26730.8	22732.9	21001.6
AHR	196	2874.25	932.533	6892.91	1846.57	996.513	947.595	439.921	1689.04	779.026	911.058	1061.89	959.27	925.176	576.755	1760.32	464.753	1295.57	1563.03	1738.03	1608.81	1365.45	952.259	444.124	222.765	916.182	1455.62	1844.46	918.108	1539.32	950.684	1560.48	318.314	427.396	1998.31	1770.37	1003.61
AHRR	57491	36.4725	45.7404	8.2655	217.468	39.2613	11.1684	17.6211	12.5852	16.8539	24.0385	31.2164	8.0611	24.5172	31.9613	44.5595	199.332	76.0301	74.3875	27.3705	14.4404	12.3398	43.6345	11.5207	12.213	126.892	32.7053	26.1404	58.8235	22.3301	26.9857	257.371	42.1512	41.6972	8.6312	27.572	96.2234
AHSA1	10598	1886.23	1516.87	1797.98	2795.48	1361.75	1066.15	1310.04	1286.31	1828.34	2049.28	2256.73	1456.51	1422	689.588	1016.32	2067.41	3011.1	1461.92	1211.63	1997.96	1458.47	1296.71	1870.39	2395.7	1419.09	1651.38	1579.92	2152.25	1700	1801.86	867.514	1315.89	830.361	1692.47	1490.54	2925.59
AHSA2	130872	461.078	628.931	554.759	1123.31	462.87	978.522	232.721	673.833	1848.94	947.115	1051.13	549.003	1126.4	1822.28	982.559	1170.94	1790.53	518.931	792.766	631.306	1076.41	1000.51	563.94	346.849	576.251	446.972	739.773	712.226	1168.45	604.367	702.922	559.593	305.562	559.152	854.732	310.108
AHSG	197	3.2662	56.032	17.5033	1.0901	100.736	4.2955	83.2447	13684.3	1.2484	202.524	5668.46	11.4552	1.8504	177.724	20.7044	86.8747	180.125	8.4633	21.0166	9102.29	8217.85	31.3142	4.0323	40.5471	26398.1	2.8439	18351.1	5081.31	18.932	23.0503	9.4352	1391.47	6.5152	731.025	3723.87	98.2176
AHSP	51327	0.5444	0.5718	0	0.545	1.0332	0	1.8229	0	0.6242	0	0.5382	0	0.4626	0	0	0	0	0	0	0	0	0.5133	0	0	0	0.474	1.0456	0	0.4854	0	0	0	0.6515	0	1.6461	0
AICDA	57379	1.0887	14.8656	0.4862	53.9583	19.6306	9.4502	4.2534	0.5244	99.2509	0.601	11.3025	0.4243	0.9252	1.4528	0	0	1.0205	0	0.4888	0	0.9492	1.54	0.576	0	0	3.3179	4.7053	2.3068	3.3981	0	0.5242	37.3062	0	0	6.9959	0.9971
AIDA	64853	977.784	912.104	996.232	910.751	1361.94	682.99	1333.35	1187.3	1454.43	1421.85	1122.71	1662.75	1125.21	1202.42	1015.09	1556.99	1368.54	1153.87	1262.16	801.666	920.427	1356.3	864.055	1366.3	1583.52	1036.7	1099.57	955.081	1035.14	1312.43	853.152	1349.53	1331.41	648.181	2011.17	1682.23
AIF1	199	703.321	287.021	605.81	192.397	555.34	322.165	854.929	395.385	1011.86	59.4952	322.39	60.2461	461.2	85.23	123.326	181.211	77.0506	260.134	405.67	250.671	283.816	385.01	419.931	324.377	30.2678	490.579	517.579	226.644	111.65	187.213	311.362	130.814	55.0533	96.8196	371.193	1227.97
AIF1L	83543	359.281	248.142	119.12	59.4086	764.045	27.4914	661.704	148.401	271.536	60.0962	16.1464	3786.59	132.763	25.6659	472.6	20.253	437.301	91.314	200.391	915.672	177.029	39.0144	117.511	1738.15	202.561	73.9424	179.846	101.499	21.8447	93.8877	441.882	40.2132	2449.71	132.845	98.3539	15.9541
AIFM1	9131	724.551	1243.57	663.182	1499.93	750.097	633.162	1091.9	885.16	860.175	672.476	1580.19	624.947	1261.48	659.08	825.926	1541.36	1338.95	970.601	1231.18	1328.15	669.198	1279.26	2649.19	2355.64	3025.61	1214.84	1396.94	1284.89	787.864	653.279	893.723	2215.12	510.139	2664.04	968.313	1027.05
AIFM2	84883	697.333	1124.07	489.121	1129.85	885.962	512.887	613.094	448.348	440.699	607.572	1022.07	854.476	747.543	1078.93	1144.59	858.088	866.947	751.893	564.516	993.058	359.279	1433.78	2089.29	2509.53	1124.56	1159.85	638.871	420.992	1086.89	749.977	989.648	936.531	1798.19	101.698	614.403	530.475
AIFM3	150209	26.2657	4.574	16.2732	99.6158	9.2987	133.136	196.123	12.0608	9.9875	37.2596	71.0441	18.8969	7.864	7.2639	12.1526	203.01	20.921	4.8998	62.175	14.8107	7.5937	5.6468	8.0645	155.838	79.1618	26.97	29.0942	2.8835	50	15.6067	9.4352	155	14.138	19.514	24.1852	14.8523
AIG1	51390	869.352	725.558	578.096	1374.57	1054.89	1171.82	1253.53	1377.56	317.728	1224.16	973.628	896.054	1201.8	788.862	529.312	724.311	537.313	817.817	560.606	655.374	892.739	1273.1	948.157	774.792	2138.53	777.817	1284.54	1367.36	1042.23	962.49	1062.51	840.116	385.048	1598.27	773.663	1119.28
AIM1	202	682.09	101.772	480.37	1455.78	427.741	326.461	88.7134	229.156	2041.82	167.668	330.463	109.461	395.05	176.271	277.709	53.2974	527.108	998.664	202.346	131.445	1100.14	380.39	74.3088	45.9209	621.653	324.209	406.221	528.258	228.641	1235.72	145.721	117.733	49.1897	396.66	490.535	1856.66
AIM1L	55057	146.434	100.629	327.215	361.902	102.286	191.581	68.6617	14.6827	26.2172	379.207	106.566	73.3984	10.1769	326.392	270.057	6.9287	46.9448	7.5724	108.504	313.987	63.5975	215.092	9.7926	322.912	8.149	136.983	215.397	181.661	952.913	19.1149	15.7253	4.845	233.244	56.2905	367.078	52.8481
AIM2	9447	234.077	13.7221	3.4034	5.9954	46.4936	12.0275	6.0763	15.7315	951.311	1.8029	7.535	2.1213	69.3882	0.4843	13.953	5.3297	1.0205	5.3452	13.1965	5.9243	49.3593	4.6201	4.6083	3.4196	0	5.6879	47.0527	2.8835	1.9417	1.6866	5.2418	2.4225	0.3258	0.3753	51.8519	421.289
AIMP1	9255	991.513	1372.83	1185.49	4894.26	4101.56	1088.03	1236.52	869.386	1131.24	646.557	1123.17	1034.55	1642.41	1131.11	1753.13	821.03	1114.64	1038.86	1183.21	867.874	942.25	1128.65	2250.3	1647.16	925.902	881.754	770.467	1328.66	1214.2	857.673	763.082	903.803	1331.82	768.346	890.395	1281.13
AIMP2	7965	466.973	611.424	539.497	683.243	679.091	402.62	806.471	580.273	236.604	328.083	808.891	499.55	920.828	411.259	666.506	526.893	710.805	444.236	555.127	484.214	491.172	478.306	1887.05	957.67	974.296	680.393	521.689	441.649	401.631	318.943	384.678	850.95	439.759	305.687	486.49	479.591
AIP	9049	1863.36	1759.29	1501.88	699.278	876.146	899.485	1842.93	834.295	4895.76	1673.68	1395.05	732.711	811.842	1370.46	1147.29	816.516	2594.72	1011.58	1015.15	567.99	1067.87	1729.98	1257.49	707.865	490.105	1602.09	5909.29	1665.51	1347.57	870.851	903.682	546.027	914.732	534.759	1123.87	1315.72
AIPL1	23746	0.5444	0	0	1.6351	2.583	0	0.6076	0	0	0	0	0	0.9252	0.9685	0.4501	1.5989	0	0	0.9775	0	0.4746	0	0	0	0	0	0	0	0	0.5622	2.0967	0.969	2.9318	0	0.4115	0
AIRE	326	1.0887	1.1435	0.9724	0.545	0.5166	3.4364	0.6076	0.5244	254.057	0	1.6146	0.8485	1.3878	1.937	0.4501	0	0.5103	1.7817	1.4663	3.7027	0.9492	0	0.576	0	0	0	1.0456	0	2.9126	0	1.0484	0.4845	0	0.7505	0.4115	0.4986
AJAP1	55966	19.0528	66.3236	95.7822	1.6351	382.281	24.055	9.1144	2.0975	3.1211	590.745	0.5382	49.2151	298.369	0	4.0509	197.733	134.201	104.677	27.8592	398.408	3.3223	139.117	1.7281	147.044	0	24.1735	133.316	2.8835	8.7379	15.1795	98.0212	2.4225	5.2122	4.128	7.8189	64.3151
AK1	203	789.33	226.987	1238.85	671.481	125.533	199.313	585.751	218.144	1433.83	819.712	689.989	521.426	160.981	355.932	346.574	362.955	735.808	362.584	503.421	213.274	256.289	992.813	307.028	241.329	1338.77	950.35	550.516	428.489	434.466	461.568	146.77	187.5	424.464	653.72	504.115	791.225
AK2	204	1733.26	1775.87	1798.47	2970.98	3052.56	1796.39	4401.03	3208.18	2186.02	2680.29	2867.06	2280.02	2383.72	2526.88	3415.78	1303.12	1645.62	1112.25	1214.57	1597.7	1018.51	1571.36	4725.81	5442.11	3493.6	2088.4	2528.82	1909.46	1287.38	1217.17	2706.33	1790.2	1078.92	1424.52	1929.22	2328.31
AK3	50808	1271.64	1977.7	1950.65	1011.58	1076.59	1525.77	629.5	1227.58	857.678	1956.13	1294.94	1285.11	2040.01	1410.65	958.704	1272.21	2425.82	940.757	1243.89	1749.88	1645.94	1189.94	2365.78	1266.73	2387.66	1694.99	1767.61	2869.67	1127.18	1436.43	1726.12	1302.33	1658.44	2940.61	910.7	1131.75
AK3L1	205	219.924	85.1915	203.72	701.458	207.671	71.3058	30.3813	353.959	21.8477	102.163	335.307	34.3657	160.518	13.0751	349.274	51.1655	129.608	76.1693	44.9658	322.503	83.0565	146.817	10.9447	515.388	60.5355	262.59	164.684	85.9285	225.728	178.218	171.406	177.326	12.3789	13.5097	381.893	285.18
AK5	26289	6.5324	17.1527	29.1722	7.0854	7.7489	8.5911	7.2915	57.6822	52.4345	3.6058	245.963	5.0912	1.3878	5.8111	5.4011	5.3297	0.5103	9.7996	21.9941	5.554	4.2715	3.0801	10.9447	2.4426	0	3.3179	2.614	112.457	18.932	14.0551	1.5725	11.1434	8.4697	5.2538	15.2263	107.192
AK7	122481	33.2063	14.2939	52.9962	53.4133	12.9149	27.4914	22.4822	4.1951	0.6242	24.0385	39.2896	44.5482	116.11	67.7966	27.0057	82.6109	73.4788	252.561	51.8084	100.713	173.707	10.2669	35.1382	8.3048	2.3283	28.4394	54.8948	150.519	158.252	55.0958	60.8046	62.9845	27.3638	82.1841	95.8848	99.2148
AKAP10	11216	300.49	590.052	278.109	548.849	307.374	331.615	24.9127	452.543	247.191	198.918	151.776	349.173	442.234	295.884	489.704	523.913	488.328	424.499	434.506	383.967	375.415	223.819	153.226	121.641	311.991	312.359	243.628	291.811	481.068	391.293	587.603	402.616	447.919	552.397	457.613	272.217
AKAP11	11215	1097.99	982.276	1539.81	1229.05	1103.96	1441.58	529.242	1136.86	1300.87	256.611	564.047	1157.4	1028.8	627.603	831.327	1574.4	1892.59	822.272	797.654	1290.75	1031.32	433.265	657.834	307.767	650.757	1370.3	643.053	1167.24	1483.01	1136.21	1476.08	618.702	1062.95	1603.15	987.654	779.26
AKAP12	9590	2216.11	380.789	1710.47	136.803	897.843	855.67	235.759	395.91	387.64	3015.62	71.5823	2296.14	562.97	1214.53	537.864	3337.48	76.5404	1277.51	1078.69	1687.31	5102.99	572.382	86.9816	102.589	385.332	3395.19	3995.29	1091.12	1101.46	1363.9	811.427	496.124	807.558	350.127	7748.56	3189.33
AKAP13	11214	5072.94	3865.64	3174.43	2791.66	2938.91	2779.21	1303.36	2015.73	4498.13	1555.89	1778.26	2728.04	4426.51	2543.34	5138.74	4707.76	3933.66	4456.57	3901.76	2886.24	6158.52	2295.69	1718.89	2137.27	2650.76	3827.47	2849.82	2832.18	2930.58	3591.35	3609.49	4318.31	3099.6	3070.46	3638.27	2415.56
AKAP14	158798	0	0	0.4862	0	0	0	0	0	0	0	0	0	0	1.4528	0	0	0	0.4454	0	0	0	0	0.576	0.977	1.1641	0	0	0	0	0	0	0.4845	0.3258	0	0	0
AKAP1	8165	2332.06	1938.82	1193.14	2675.57	1483.15	1370.27	696.947	2354.48	589.263	1420.07	2374.6	1817.14	1503.41	1804.36	2300.44	1489.13	4233.7	1465.48	2999.51	1872.81	1598.01	1819.3	1949.88	866.634	1800.93	2502.67	1633.25	1312	1733.5	1447.67	2789.15	2505.33	2061.41	1293.55	1732.92	800.199
AKAP2	11217	794.622	505.409	334.98	314.49	571.251	173.325	0	780.561	320.087	40.1983	721.254	606.228	615.774	95.9806	598.222	351.582	144.524	1065.12	508.182	486.128	1092.64	16.4887	46.4286	59.575	259.418	2760.5	369.641	288.708	194.209	631.409	498.54	481.546	357.329	575.277	893.876	1054.15
AKAP3	10566	10.8873	12.5786	6.8069	9.2656	13.9481	5.1546	46.1796	6.2926	29.9625	11.4183	16.1464	2.9699	27.2927	5.8111	2.7006	11.1924	8.6746	11.1359	2.9326	9.2567	6.6445	4.1068	2.8802	11.236	0	18.0116	17.2526	9.2272	3.3981	13.4928	2.0967	1.4535	48.2124	27.3947	5.3498	22.4355
AKAP4	8852	0	0	0.4862	0	0	0	0	0	0	0	0	0	0.4626	0	0	0	0	0	0	0	0	0	0	0	0	0	0	0	0	0	0	0	0	0	0	0
AKAP5	9495	97.9858	70.8977	41.8135	58.8636	151.879	48.11	29.166	18.3534	151.685	12.0192	30.1399	34.79	67.5379	26.1501	18.0038	76.7482	56.6399	49.8886	26.8817	70.7211	46.9862	18.4805	14.977	4.8852	18.6263	30.3353	66.9194	40.3691	52.4272	30.3589	61.853	29.5543	22.4774	12.0086	32.9218	69.3008
AKAP6	9472	161.677	45.7404	44.7308	57.7735	38.7447	10.3093	18.2288	54.5359	24.3446	123.197	37.1367	116.674	150.341	72.155	177.788	201.997	52.5577	279.733	106.061	50.3564	214.998	37.9877	37.4424	29.7997	137.369	287.238	143.249	144.175	150.971	187.213	44.5551	145.349	79.4853	115.583	68.7243	23.4326
AKAP7	9465	314.099	1915.95	410.356	509.061	1579.23	3292.1	4424.73	542.737	308.989	1000.6	868.138	112.431	4451.02	1009.2	2047.49	76.7482	24.4929	91.7595	1949.66	1121.17	973.896	2221.25	1393.43	409.868	381.839	1108.19	850.085	854.095	622.816	199.019	3010.88	777.132	337.161	91.9411	257.613	400.848
AKAP8	10270	746.87	845.626	650.055	651.86	809.505	796.392	805.712	604.09	1253.43	873.798	747.578	803.564	834.509	852.3	651.739	686.47	866.947	750.557	954.057	854.577	1011.39	687.885	601.958	627.259	452.852	707.193	742.909	773.933	747.573	727.489	945.617	667.636	962.945	663.102	618.519	705.97
AKAP8L	26993	979.314	1222.98	1094.45	711.269	1054.37	1640.03	2182.59	729.418	2362.67	3240.99	1554.9	1376.75	1738.87	1721.55	788.117	981.205	736.318	755.902	1575.27	1147.09	1604.65	1917.35	1368.66	1310.21	869.616	1189.24	1318.52	1717.99	1177.67	1197.49	1053.6	735.95	1109.86	1107.05	707.407	1115.29
AKAP9	10142	1076.76	2781.02	4077.31	2135.44	1894.87	2317.01	809.965	2136.34	866.417	1073.92	1469.86	1682.22	5257.78	2178.69	2926.52	1121.38	1815.54	2123.83	2021.99	2932.15	2582.82	1032.34	2004.61	792.379	894.063	1474.58	1345.71	1883.51	1603.88	1829.97	2843.14	1206.88	1299.13	9009.85	1644.44	731.397
AKD1	221264	57.1584	32.0183	109.396	47.9629	82.1387	53.2646	17.0135	82.3283	124.22	52.2837	46.8245	117.947	65.6875	63.9225	91.8195	14.9233	232.683	40.0891	58.1623	26.289	72.1405	49.7947	11.5207	20.5178	80.326	61.6187	64.3053	44.406	50.9709	65.7776	77.5783	21.8023	57.3337	107.702	138.272	76.2807
AKIRIN1	79647	984.213	718.125	989.911	1075.9	1119.98	682.99	660.489	1063.45	895.131	460.938	1122.71	977.938	884.469	811.138	790.818	662.486	893.992	431.626	1066.47	2288.99	946.844	1328.03	882.489	1374.69	2040.75	711.933	796.236	474.048	678.155	1240.78	1629.14	1126.45	379.184	895.018	2620.16	1240.93
AKIRIN2	55122	755.035	607.204	510.028	2350.73	901.459	472.509	428.984	719.979	1121.72	792.668	313.778	496.394	716.087	311.864	394.284	284.075	982.778	365.256	397.361	662.779	532.511	513.86	592.166	1024.91	463.329	429.909	539.537	1395.04	643.204	488.554	437.688	383.721	358.987	412.046	464.197	1172.63
AKNA	80709	1626.02	536.878	454.115	533.043	1326.1	377.148	531.065	518.616	10170.4	374.399	357.373	450.573	1663	150.605	504.557	564.952	532.721	606.236	706.745	667.592	1182.25	592.916	256.912	262.335	527.357	537.504	1219.19	228.374	231.068	452.573	414.1	377.907	313.706	338.869	917.696	829.116
AKNAD1	254268	0.5444	0	0	0.545	0	0	0	0.5244	0	0	0	1.2728	0	1.937	0.4501	1.0659	1.0205	0	1.4663	0.3703	0	0	0.576	0	0	0	0.5228	0.5767	0.4854	0.5622	1.5725	0.4845	0	0.3753	2.0576	0.9971
AKR1A1	10327	1489.93	1661.52	2326	4581.01	3715.87	2130.58	4651.98	2402.2	2993.76	3853.37	3829.92	1780.65	1706.95	2137.53	2042.08	1960.81	2522.26	3227.62	2899.32	4519.49	1761.27	3277.21	2475.81	7365.9	2844	1195.88	3454.71	1930.22	1172.33	2575.45	2612.5	3911.34	962.293	1122.81	2449.38	2378.66
AKR1B10	57016	131.192	127.501	1288.44	1124.95	5481.6	6072.16	1137.48	7316.73	0.6242	1493.99	2966.63	298.26	119.348	4627.6	8224.6	216.92	4131.14	289.087	11409.6	466.537	2856.67	1546.2	173.963	14788	379.511	6.6359	483.074	7252.6	11678.6	1173.88	9796.88	581.88	1485.79	780.561	1674.49	298.641
AKR1B1	231	1508.98	510.577	1125.08	632.784	1674.8	379.725	414.401	1136.34	2264.67	734.375	4762.65	477.726	784.087	1288.14	1497.02	680.074	887.868	855.679	1249.76	508.377	1405.32	2316.74	1036.87	1403.52	154.831	5615.83	1125.08	885.236	2069.9	481.807	1370.2	2603.2	549.23	873.253	1906.58	3595.16
AKR1B15	441282	9.2542	0.5718	1.9448	10.3556	76.4562	0	0.6076	2.0975	0.6242	0.601	0.5382	1.2728	0.9252	15.9806	1.3503	2.1319	17.3492	0	113.392	1.8513	14.7129	16.9405	0.576	84.5139	1.1641	0	0	1.1534	60.6796	6.1842	90.1586	5.3295	9.7728	10.8828	12.7572	2.4928
AKR1C1	1645	1945.02	3183.53	164.337	1283.01	14909.5	12599.7	20833.1	7034.23	199.75	16056.5	861.679	4586.95	9057.8	10366.6	26267.8	267.02	8333.21	3075.28	16869	1211.89	7612.24	1087.27	10780.5	47011.2	2168.8	1091.6	4354.2	16961.9	19510.2	639.224	7083.21	4239.83	17331.4	9242.89	942.798	2968.47
AKR1C2	1646	687.534	7779.3	140.513	204.933	6363.94	2800.69	3304.27	1852.12	147.94	6993.39	346.071	442.087	310.859	961.743	3354.11	48.5006	6628.4	597.773	1667.64	634.268	1119.13	995.38	1502.88	20150.5	1678.7	564.996	2710.23	2050.17	8211.17	330.575	9697.81	10329	2802.51	708.885	506.996	1885.08
AKR1C3	8644	1244.42	5917.67	948.584	4651.86	9238.28	4680.41	11532.7	3798.49	124.844	6396.63	1210.44	1983.88	4411.38	4442.61	5443.01	418.917	4146.96	4018.26	6662.76	2078.68	2249.64	4663.76	11697	19034.2	5650.76	8905.32	4383.22	5208.77	12126.7	1526.38	6932.77	13554.3	1207.92	3881.41	1256.38	2998.38
AKR1C4	1109	1.6331	28.016	1.4586	40.3325	43.9106	12.0275	131.855	938.647	0	167.067	367.061	32.6686	30.9934	29.0557	55.8119	23.4508	170.43	0.4454	161.779	624.641	500.712	22.5873	211.405	123.107	1162.98	1.896	455.365	725.49	113.592	39.9163	27.7814	103.682	5.8637	64.1711	297.531	16.4527
AKR1CL1	340811	0.5444	0.5718	0	0	1.5498	0	0	11.5364	0	0	2.6911	0	0	1.4528	1.3503	0	1.0205	0.4454	0.9775	1.8513	1.8984	0.5133	0	0.4885	2.3283	0.474	4.1825	2.3068	1.9417	0	0.5242	0.4845	0	0	0.823	0
AKR1D1	6718	1.0887	5.1458	0	20.1662	5.166	0	0	413.214	1.2484	149.639	151.776	3.3941	1.3878	0	0.9002	1.5989	5.613	0	5.3763	496.159	348.837	0	0	2.4426	1003.49	0	428.702	408.305	2.9126	0.5622	0.5242	55.2326	0.3258	0	225.926	1.4957
AKR1E2	83592	38.1056	2.8588	4.3758	49.053	68.7072	30.9278	7.2915	3.1463	6.8664	144.832	3.2293	98.6636	1.3878	0.4843	78.1366	10.1265	78.5815	22.7171	5.3763	10.3675	2.373	23.614	4.6083	1.9541	61.6997	70.6245	56.2018	5.767	16.9903	2.2488	93.3036	2.4225	1.303	3.3774	147.325	37.3925
AKR7A2	8574	636.908	906.804	1134.8	3004.77	514.013	461.34	1167.25	912.428	995.006	819.712	922.497	384.387	503.759	761.259	838.528	692.333	582.217	494.877	698.436	657.225	621.263	694.045	1608.87	1301.42	2051.22	558.834	949.418	1043.83	532.524	633.039	594.942	877.423	405.57	1181.72	605.35	844.572
AKR7A3	22977	60.4246	16.5809	1314.21	1814.96	61.9915	563.574	289.23	744.625	26.2172	649.639	610.872	21.6377	181.797	71.1864	22.5048	383.208	61.2323	7.5724	55.2297	273.257	365.923	13.347	6859.45	355.154	5814.9	6.1619	1428.31	4589.39	23.301	105.694	69.7156	1535.37	13.0304	2925.98	282.716	118.16
AKR7L	246181	13.0648	16.0091	176.978	295.953	32.0289	206.186	189.579	84.4258	13.7328	141.226	67.8149	13.5766	18.0409	51.816	58.9625	152.964	25.5135	4.4543	39.5894	37.397	44.1386	5.6468	410.714	39.5701	1305.01	3.3179	144.818	276.24	34.9515	16.8661	41.9342	59.1085	100.66	657.848	67.9012	15.4556
AKT1	207	3729.99	2167.52	3823.99	4210.93	1976.49	3695.02	1833.81	2364.97	3259.05	2306.49	2376.75	3201.95	1523.77	2283.29	1540.23	2979.32	4263.3	2188.42	2193.55	3487.92	2478.88	1950.21	2773.62	3380.56	6413.27	2271.83	2384.52	3107.27	3018.45	3477.22	1739.22	1683.62	1947.39	2686.18	2055.14	4628.19
AKT1S1	84335	1253.67	1562.04	1100.28	904.755	1664.99	1286.08	3358.95	1412.69	758.427	3148.44	1895.59	1130.25	965.884	1129.78	1266.57	1864.34	1011.86	1093.99	1588.95	1912.43	1439.96	1460.99	2697.58	2507.57	2332.95	751.748	1413.67	1501.15	1406.8	1458.35	2189.49	2025.19	903.005	1368.61	1136.21	1126.76
AKT2	208	2127.38	2436.25	1849.52	1527.73	3139.35	2583.33	1898.22	2546.41	3347.69	2953.12	2757.27	2221.89	3419.91	2620.82	2747.38	3204.24	2302.33	2037.42	2871.95	3839.67	3956.34	2159.14	3356.57	3394.72	3450.52	5284.99	2619.79	2435.99	2228.16	2411.85	2666.49	3570.25	2271.19	2130.41	2062.96	1583.45
AKT3	10000	936.854	1053.74	523.155	119.362	942.27	168.385	370.044	964.342	419.476	54.6875	862.756	207.467	1210.13	992.252	310.566	1220.51	84.7047	1669.49	713.099	593.909	292.833	601.129	304.724	138.74	77.9977	2392.7	488.825	196.078	652.913	323.828	2173.76	1001.45	565.518	200.394	1568.72	1080.39
AKTIP	64400	621.443	605.62	500.148	398.06	699.915	531.847	644.806	1143.99	476.348	588.095	488.31	629.792	803.109	855.153	792.623	366.952	177.002	377.702	500.088	731.419	784.722	453.039	527.995	867.093	413.76	557.725	635.41	922.526	766.752	262.593	690.153	361.744	741.748	675.399	977.7	601.376
ALAD	210	886.772	6244.14	1044.37	1091.16	1322.48	1063.57	1677.05	1697.43	824.594	1591.95	2666.31	2496.82	3733.55	1696.37	1650.05	1536.56	1020.03	2069.93	1253.18	1752.48	1637.87	2282.34	1687.21	1168.54	4298.02	1943.83	2455.63	2350.63	900	1070.43	2035.38	521.802	3040.96	8191.01	1410.7	974.199
ALAS1	211	925.422	922.241	1494.59	1271.02	1038.87	871.993	669.604	2300.47	693.508	880.409	951.561	1046.67	941.83	579.661	775.965	810.653	594.464	667.706	875.855	1277.79	1159.47	733.059	1135.94	1485.1	2349.24	902.477	3528.43	2390.43	888.35	662.274	722.317	1425.87	1008.23	1146.07	1183.13	1575.97
ALAS2	212	2.1775	15.4374	2.431	6.5404	2.583	0.8591	7.2915	1.5732	0	0.601	5.3821	0	1.8504	0	1.3503	0.533	0	2.6726	0.4888	4.0729	0.9492	1.54	4.6083	0	0	15.6417	1.0456	5.767	11.6505	0.5622	6.2901	15.5039	0.9773	0.3753	8.642	1.4957
ALB	213	353.293	2787.31	120.092	77.9398	2653.24	7780.93	5413.34	369220	18.7266	193339	176548	107598	189.199	289576	47404.1	3435.55	4485.78	31876.6	140633	291521	415829	168594	73095.6	4634.1	9242.14	1271.24	927151	263948	99592.7	37908.7	55607.4	58886.1	130234	163188	156294	8220.86
ALCAM	214	1750.14	3689.54	1953.08	2800.93	18794.8	7406.36	9458.91	13068.7	892.634	11231.4	10016.7	779.805	11114.6	5206.3	1958.82	390.67	5053.2	2477.95	941.349	819.032	4903.65	3303.39	1784.56	11755.7	3232.83	2362.84	4642.53	6622.84	2261.65	1383.02	5532.7	1728.68	3392.13	250.305	1347.33	7550.79
ALDH16A1	126133	897.659	1404.23	932.539	806.649	1371.56	1500.86	3925.87	825.38	2450.69	2486.18	1443.49	667.374	1006.13	1980.63	1038.82	1995.45	754.178	996.882	1546.92	1626.96	1400.57	1308.01	3491.94	1897.9	1450.52	503.851	1865.38	930.796	1525.73	1041.76	1024.77	1402.62	402.313	297.964	656.79	798.205
ALDH18A1	5832	1984.76	1127.5	1480.49	3239.68	1343.15	1335.05	1441.9	2312.01	936.33	670.072	3854.68	4277.05	1335.49	1340.44	1440.31	1198.12	3531.57	1114.48	1296.19	2749.98	1151.4	1261.81	2031.11	2727.41	1034.92	2545.8	1556.92	1844.87	1386.89	915.827	1121.74	1793.6	1820.02	987.335	1579.84	2432.51
ALDH1A1	216	3071.86	2482.56	2120.82	5337.51	8730.47	241.409	3403.92	4251.7	501.248	8060.1	7593.11	1931.69	10582.2	600.484	2348.6	186.008	3556.58	3060.58	2783.97	2744.42	5339.82	1028.75	187.788	324.377	11072.2	3695.22	9285.06	9123.99	2360.19	130.993	11332.2	9961.24	629.693	11683.3	2153.91	1693.13
ALDH1A2	8854	173.108	52.0297	42.7859	680.747	483.017	35.2234	26.7355	15.7315	23.7203	6.6106	2115.18	4.2427	106.395	4.8426	165.635	12.7914	53.068	46.3252	35.1906	15.181	114.855	217.659	6.3364	27.8456	77.9977	236.521	44.4386	13.2641	123.786	2973.49	117.94	8.2364	40.3942	258.186	132.099	81.7649
ALDH1A3	220	2501.49	1682.35	1899.28	12.0234	195.485	451.804	84.6848	232.26	244.444	291.929	204.898	372.855	124.478	271.235	452.868	585.232	71.1417	595.942	278.368	216.232	796.644	153.008	84.5392	80.8256	185.378	339.675	1420.53	183.812	32.6068	398.472	333.23	196.231	854.503	7.1301	1245.74	124.372
ALDH1B1	219	894.937	2189.82	964.143	492.71	1313.19	536.942	2955.49	2201.36	376.404	1587.74	4069.97	1152.31	2087.2	943.341	783.166	4592.63	1522.13	644.098	799.12	1058.97	4696.25	745.38	2214.29	12653.6	1997.67	392.938	2325.45	12881.8	1103.4	1420.12	2329.45	784.399	2144.15	685.618	1169.96	838.091
ALDH1L1	10840	463.255	255.575	620.396	32.157	553.79	34.3643	620.386	2303.09	9.9875	328.726	854.144	49.2151	589.8	157.385	1616.29	117.254	294.425	129.621	62.5611	1419.61	1772.19	22.0739	164.746	17.0982	1332.95	0.948	2532.48	882.93	255.34	346.317	289.346	985.465	11.7273	7.8807	666.255	83.7592
ALDH1L2	160428	264.017	56.6038	221.223	54.5033	49.5932	15.4639	10.9373	82.3283	28.0899	6.0096	26.9107	50.0636	144.327	52.7845	87.7687	40.506	65.8247	145.657	87.4878	92.1966	132.416	9.2402	21.8894	5.8622	24.447	46.925	63.2597	43.8293	64.5631	104.007	16.2495	142.442	102.94	45.7829	98.3539	109.186
ALDH2	217	2554.71	1114.35	3412.67	2352.36	4779.03	849.656	6714.87	9835.34	2096.75	5089.54	9583.42	2718.29	6901.82	5316.71	1532.13	2968.66	2135.48	2870.38	6016.62	6719.99	9366.87	4305.95	4622.12	8020.52	7707.8	981.633	15846.3	17253.2	3320.39	3682.99	3159.74	2334.79	1659.74	27737.3	4171.6	1676.68
ALDH3A1	218	14.6979	1.7153	602.893	56.1384	22.7302	4.2955	71.6998	21.4997	21.8477	61.899	11.8407	0.8485	6.4762	26.6344	17.1036	47.9676	13738.5	12.0267	213.588	58.132	49.3593	10.7803	2.3041	11.236	15.1339	4.2659	129.133	19.0311	44.6602	8.433	83.3443	145.833	2.2803	2.2516	9.465	134.613
ALDH3A2	224	997.822	2402.52	2379.97	2093.47	2411.47	3144.33	4374.91	4351.86	837.079	5831.73	2894.51	3984.73	8486.18	4990.8	3791.61	3080.59	9042.48	3262.81	6320.14	3342.4	4687.23	2729.47	2799.54	2995.6	5465.66	1027.14	4568.29	4028.26	3757.77	3801.61	2706.33	2169.09	5306.3	5603.15	2195.47	2479.87
ALDH3B1	221	1174.2	343.053	2350.8	2134.9	954.669	201.89	224.214	366.02	242.197	216.346	1429.49	1216.8	1020.01	360.291	1526.27	729.108	2854.96	483.742	420.332	272.147	263.882	243.327	559.332	2061.07	266.589	7076.19	4058.03	651.672	1220.39	589.75	2033.29	2594.96	1561.04	52.1625	844.444	996.635
ALDH3B2	222	643.44	4.0023	11.6689	8.7205	106.935	0	3.0381	3.6707	1.8727	189.303	16.6846	497.666	2.3129	40.678	464.049	4.2638	1777.27	283.742	373.411	99.602	0	497.947	0	23.4489	2.3283	45.029	433.407	0.5767	17.4757	1241.34	3.1451	4.845	175.584	419.552	109.465	11.467
ALDH4A1	8659	330.974	348.199	220.25	1036.65	1236.73	155.498	1639.37	2399.58	195.381	2376.2	1935.41	1425.97	2493.81	1385.96	2944.98	4374.12	476.081	1975.95	714.565	2126.45	1922.16	2699.18	4118.09	8918.42	12880.1	606.233	3751.14	4545.56	1720.87	662.836	1316.73	2216.57	272.661	1994.18	788.889	1347.13
ALDH5A1	7915	524.224	723.27	271.302	1321.16	496.965	348.797	407.717	1140.01	875.78	801.683	435.414	781.502	655.025	840.678	1618.99	808.521	873.071	701.114	1312.81	930.482	1013.29	867.557	850.23	531.998	4133.88	570.684	1930.21	1013.26	498.058	653.841	931.464	1693.8	764.557	1313.82	551.44	440.234
ALDH6A1	4329	148.356	245.735	170.546	381.79	185.726	163.677	19.3833	667.604	43.2959	109.081	213.832	394.977	193.311	152.417	239.028	375.8	103.1	324.022	238.055	554.735	779.834	55.2259	69.038	199.121	1315.4	118.668	601.098	476.707	250.548	258.062	131.867	253.91	86.7856	2776.14	339.761	95.5453
ALDH7A1	501	955.906	1169.81	1018.6	1065.54	1078.65	655.498	845.207	1120.61	386.392	2651.44	1146.39	942.724	925.639	1753.03	1884.55	946.561	922.056	1684.19	1101.17	1140.42	1448.03	946.099	1241.36	1853.44	6307.33	942.292	2965.89	1906	1210.19	1759.13	1157.38	1025.68	923.202	2091.75	1111.11	845.569
ALDH8A1	64577	35.9281	44.0252	4.3758	5.4503	443.756	6.8729	231.505	933.403	21.2235	177.284	279.333	36.4871	484.33	72.155	16.6535	20.253	43.8831	9.7996	466.276	1076	1029.9	21.5606	1339.86	463.605	94.2957	4.7399	993.857	524.798	582.039	41.603	649.456	119.186	18.2425	1.5011	361.728	148.074
ALDH9A1	223	1129.01	1257.86	1303.51	3426.62	1004.78	2126.29	1165.43	1500.79	1889.51	1218.75	2231.43	3913.45	2139.93	1694.92	1448.41	2743.75	2334.48	1359.47	2804.99	980.098	1853.35	1443.53	1484.45	1263.31	2841.68	991.113	2242.84	1930.22	1244.17	2537.78	1505.44	1440.89	1996.91	3112.11	1390.54	1389.01
ALDOA	226	18807.3	36128.6	34830.2	30602	17035.8	20735.4	31836.5	26556.9	15314	14932.1	16291.2	21473.5	12793.3	12796.6	23890.6	30505.3	32477.6	18457.9	8049.85	12685	5466.07	30505.1	59017.3	25450.4	18406.3	52686.8	10597.8	16868.5	25998.1	21897.2	12022.5	63797.5	11552.4	11363.5	20929.2	43681.9
ALDOB	229	11.976	205.26	267.898	2627.61	224.202	218.213	143.4	26689	19.975	2010.22	14840.7	16.1222	6510.47	207.748	166.535	138.04	454.14	33.4076	1074.29	12656.9	9575.7	101.643	28.2258	2171.47	209567	5.2139	26965.4	11308	619.903	60.1556	279.387	3060.08	42.3487	136.973	10350.6	299.639
ALDOC	230	357.648	113.207	880.029	1256.3	144.647	25.7732	81.4218	227.058	1068.04	232.572	604.413	561.307	129.525	287.651	231.799	531.908	938.895	386.637	280.059	178.099	171.808	108.316	78.341	72.7894	2669.38	1065.06	491.439	81.8916	552.427	345.192	95.4003	209.302	155.061	372.268	499.177	505.048
ALG10	84920	76.7556	52.6015	134.192	25.6166	90.9208	87.6289	30.3813	80.2307	34.3321	72.7163	87.7287	97.5817	103.62	66.3438	89.1189	92.7374	132.16	154.566	104.594	91.0858	142.382	76.4887	41.4747	45.9209	41.9092	44.0811	74.7615	62.2837	104.854	112.44	47.176	97.8682	70.6898	67.1733	80.2469	78.7735
ALG10B	144245	199.238	328.759	205.178	20.1662	276.895	363.402	174.389	250.655	189.763	337.139	219.591	287.229	140.627	275.06	314.617	265.954	288.812	348.775	297.654	341.387	277.646	255.647	144.585	97.704	151.339	235.099	202.849	266.436	342.718	181.591	208.623	445.252	221.191	189.511	174.486	139.1
ALG11	440138	13.0648	23.442	23.3378	35.4272	14.9813	61.8557	12.1525	24.1217	13.1086	4.8077	4.3057	19.5163	20.3539	11.6223	14.4031	18.6541	70.9274	20.9354	20.5279	23.3269	9.9668	11.807	25.3456	7.8163	23.2829	10.9018	6.7965	17.8777	20.3883	44.414	8.3868	8.2364	30.2956	10.5076	10.6996	11.467
ALG12	79087	724.551	970.269	769.175	868.238	659.693	882.302	565.092	654.431	747.191	1356.97	811.087	649.554	431.595	724.939	707.55	748.295	676.107	681.514	1086.02	906.785	688.182	850.616	992.511	1170.49	1274.74	371.134	769.05	933.103	954.369	558.829	926.222	980.62	749.247	1243.27	512.346	669.575
ALG13	79868	479.042	445.397	633.038	660.581	421.542	489.691	195.048	332.984	897.004	267.428	386.975	317.353	480.629	401.453	267.807	651.294	608.751	411.136	480.938	537.628	548.173	702.259	336.982	382.022	527.357	241.735	379.035	692.618	501.456	594.247	523.129	514.535	326.411	512.243	517.696	309.61
ALG14	199857	224.279	295.026	195.454	202.207	300.142	426.976	498.861	306.24	92.3845	447.716	306.781	248.197	264.138	182.082	248.453	238.772	170.94	346.102	299.12	285.846	157.57	562.115	201.613	603.811	306.17	80.1043	213.305	292.387	269.418	321.58	392.609	510.174	102.94	248.053	315.638	263.742
ALG1	56052	900.071	751.898	839.835	931.348	667.473	706.632	1063.01	664.447	630.911	1119.74	922.788	801.693	820.058	466.16	823.297	758.118	590.371	777.751	662.649	901.75	727.674	713.019	1184.67	931.632	884.074	441.649	774.45	1149.83	975.845	1088.42	920.278	906.58	582.428	499.469	860.716	1066.02
ALG1L	200810	105.552	4.2996	58.7772	97.719	2.6501	3.1959	5.9244	2.5275	8.8077	2.506	0.662	53.216	3.8487	0.7215	3.6278	1.8068	154.714	3.5768	6.9795	4.595	3.2985	1.9867	2.9608	6.3556	639.267	1.3272	2.086	7.3414	4.6553	2.7829	52.0718	1.124	6.5836	134.947	4.8642	1.3411
ALG1L2	644974	2.7218	0	2.9172	0.545	0	0.8591	0	0	0	0	0	0	0	0	1.3503	0.5436	3.5719	0.4543	0	0	0	0.5133	0	0	0	0	0	0	0	0.5734	0	0	0	0	0.4115	0
ALG2	85365	550.354	1542.02	831.409	608.257	910.241	896.048	730.366	846.88	591.76	553.486	919.268	1073.4	1119.46	426.634	595.927	1517.38	680.699	799.109	565.982	1685.83	590.413	501.027	1458.53	740.596	882.421	784.453	593.386	901.384	799.029	526.221	487.485	660.853	661.292	910.029	679.424	818.646
ALG3	10195	1624.39	1793.02	932.539	1770.27	1728.01	1574.74	2514.36	1388.04	883.895	1867.19	1975.24	990.666	1562.62	550.121	997.862	1950.15	1661.44	1067.26	1244.38	1965.75	882.772	1587.78	2724.08	1910.6	2833.53	2425.41	1190.43	1233.56	957.282	1109.22	861.748	2074.61	1108.56	864.621	1237.86	1370.56
ALG5	29880	880.24	1421.38	1167.38	1079.71	784.709	1426.12	1251.1	660.199	476.28	679.087	491.389	733.56	486.643	599.032	330.82	1145.89	624.059	518.486	462.366	963.436	478.405	567.249	1816.24	602.833	1261.93	858.395	579.793	1173.59	834.466	450.324	911.545	648.74	877.922	653.345	638.272	568.366
ALG6	29929	248.775	158.948	340.343	618.068	307.891	331.615	388.88	169.9	393.883	485.577	299.247	215.528	242.859	493.947	284.911	126.848	164.817	719.822	557.673	456.91	319.886	424.538	376.728	411.822	408.615	99.0639	352.372	216.263	139.32	358.685	554.056	471.899	121.183	350.502	302.469	313.1
ALG8	79053	697.877	848.485	677.768	428.396	589.952	858.247	665.958	858.941	506.866	1258.41	698.601	731.438	942.755	397.094	713.852	907.121	441.383	710.468	407.625	519.856	653.536	536.961	855.991	876.404	745.052	571.632	518.625	456.747	839.32	657.214	1361.29	641.957	652.822	609.438	1097.53	921.85
ALG9	79796	540.011	483.133	488.149	488.35	426.191	527.491	469.695	488.201	352.684	564.904	324.004	472.21	541.691	387.894	320.918	447.165	304.12	514.031	321.114	376.192	605.6	472.279	653.802	596.483	578.58	605.285	387.4	348.904	605.34	480.12	332.853	442.345	499.063	379.773	504.115	545.93
ALK	238	5.4437	1.1435	7.7793	0.545	0.5166	0	0	4.7195	1.8727	0.601	0	0	0	2.9056	0	0	0.5103	1.7817	2.9326	4.0729	1.8984	1.0267	1.1521	0.4885	0	0	0	0	0	1.1244	0.5242	2.4225	0.3258	8.2559	0	4.9857
ALKBH1	8846	311.922	132.076	200.316	214.198	164.794	150.344	88.7134	121.657	342.072	329.928	121.098	174.798	133.688	146.247	118.375	199.865	187.269	203.118	158.358	192.539	253.916	135.524	131.912	157.792	192.084	131.769	222.716	266.436	248.058	166.974	179.269	133.236	99.3566	302.092	167.49	213.885
ALKBH2	121642	451.824	115.495	159.475	144.979	84.2051	62.7148	237.582	79.182	415.73	748.798	439.182	360.204	171.62	217.918	183.189	103.397	235.744	608.463	431.085	128.113	444.233	570.842	65.6682	104.055	766.007	182.486	410.927	412.918	403.884	323.828	30.4023	121.609	179.493	186.884	349.383	210.395
ALKBH3	221120	570.495	350.486	490.58	158.605	240.734	286.082	599.119	295.228	488.14	167.067	417.115	166.313	336.764	16.9492	32.857	363.488	429.136	275.724	78.6901	161.437	178.927	364.476	565.668	182.706	175.786	269.7	152.137	215.11	111.65	253.553	173.503	161.337	342.373	228.915	182.304	517.512
ALKBH4	54784	308.699	340.749	442.032	342.237	322.981	174.648	619.128	225.658	454.033	645.06	316.792	239.669	279.121	324.542	237.403	199.945	287.271	205.541	286.647	191.425	270.313	400.914	482.448	360.723	215.832	177.021	306.37	347.808	202.398	260.884	375.825	286.671	193.869	285.929	210.383	262.47
ALKBH5	54890	1926.45	1987.99	1728.31	2926.24	1231.56	1291.24	1645.45	1625.07	3060.71	2022.12	1025.78	1857.62	1785.01	2170.49	1537.86	2042.58	3299.91	1506.39	1998.24	950.066	1746.43	1800.68	2088.67	1424.44	1930.15	1469.63	1980.26	2108.52	2286.5	1694.75	1868.12	1967.82	1279.75	1899.94	1952.22	2804.13
ALKBH6	84964	126.293	154.946	180.868	115.002	131.732	164.089	261.887	89.1453	524.969	459.135	339.613	140.008	85.5788	222.276	107.573	236.107	104.095	119.822	247.801	199.204	162.791	197.125	89.8618	249.634	102.445	410.949	252.516	182.238	133.01	121.998	98.5454	109.981	159.622	139.225	185.597	129.627
ALKBH7	84266	763.201	1661.52	859.122	475.814	736.149	918.385	3747.84	665.443	1596.13	1601.56	1550.59	725.923	712.386	1105.08	897.941	939.633	404.643	1027.62	662.268	850.875	930.233	915.298	2370.39	1036.64	1562.28	857.448	1232.78	1034.03	805.34	764.595	1182.54	1191.86	599.723	768.928	642.798	860.526
ALKBH8	91801	323.898	149.8	237.268	88.2954	148.78	152.921	101.474	177.242	264.045	293.269	118.945	297.836	199.375	99.7579	254.304	239.305	126.547	270.824	186.217	147.367	293.308	129.363	81.2212	114.802	107.101	233.203	154.228	111.88	196.602	351.938	112.174	145.349	208.812	259.687	276.543	219.868
ALLC	55821	5.4437	0	0	0.545	0	1.7182	3.0381	2.0975	0	0	4.8439	0	1.8504	4.8426	2.2505	0	2.5513	2.6726	1.955	1.4811	4.2715	1.54	3.4562	0.977	3.4924	0	8.3649	3.4602	0.4854	0	0.5242	1.938	0.9773	1.1258	0.823	0.9971
ALMS1	7840	510.615	430.532	466.27	395.149	615.265	414.089	422.3	341.374	300.25	409.856	277.718	625.371	724.876	675.545	675.144	626.777	775.099	861.915	747.312	383.597	555.292	440.452	278.226	306.79	243.306	477.308	456.411	267.013	648.058	632.477	829.773	686.531	488.965	517.122	552.263	527.982
ALMS1P	200420	3.2662	1.1435	1.4586	0	0	0	0	0.5244	1.2484	1.2019	0.5382	2.9699	0.9252	4.8426	3.1507	1.0659	7.1438	0.8909	1.4663	0.7405	0.9492	1.54	0.576	1.4656	1.1641	0	2.614	0.5767	0.4854	0.5622	1.5725	0	0	14.6355	0.823	0.4986
ALOX12	239	19.0528	6.924	3.9674	0.545	0.5218	2.5773	3.0381	3.1725	11.2984	7.2115	6.9968	10.6703	6.0692	14.1453	6.3328	3.7628	7.1591	5.8352	17.5122	22.8936	7.6744	5.6468	2.3041	0.977	8.149	3.6118	10.0379	7.5836	5.8932	2.811	13.6758	6.8508	10.4601	2.6381	3.7325	6.5262
ALOX12B	242	8.1655	1.1435	23.3378	31.0669	4.639	0	1.8229	0.5244	9.5443	3.0048	3.8321	0	0.4626	2.9249	12.0986	8.4903	2.5462	4.8998	0.4888	0	8.9986	1.54	7.0276	0	2.3283	7.7308	13.593	10.3806	15.6505	7.3086	0.5242	24.7045	11.812	0	1.6461	0.4986
ALOX12P2	245	8.7099	108.633	37.9239	45.2378	49.5932	110.825	30.3813	9.9633	10.6117	228.966	1.6146	45.821	0.9252	127.361	0	101.798	427.606	26.7261	205.279	52.9483	40.3417	209.446	102.535	42.9897	27.9395	33.1793	24.572	117.647	222.815	132.68	123.182	85.7558	80.7883	31.5227	148.971	12.9627
ALOX15	246	3.8106	1.1435	0.4862	280.147	1.5498	0.8591	0.6076	0	19.3508	0	1.0764	0	0.4626	30.5085	5.4011	0	2.5513	2.6726	19.0616	3.7027	36.5449	1.54	0.576	0	5.8207	0	0.5228	0.5767	0	4.4976	0.5242	1.4535	1.9546	4.5032	0.4115	0
ALOX15B	247	136.636	70.8977	101.617	13.6258	6.1991	18.0412	1.8229	67.1211	148.564	11.4183	5.9203	2.5456	165.607	12.1065	27.4558	20.786	5.1027	2.6726	15.1515	101.083	52.2069	7.1869	6.3364	0.977	18.6263	6.6359	9.4105	4.6136	3.8835	8.9952	7.3385	41.6667	7.8182	4.8785	20.9877	52.8481
ALOX5	240	1544.37	306.461	1281.63	6233.55	4293.94	1017.18	245.481	1006.82	3463.8	198.317	1993	118.795	1080.14	84.2615	3243.84	163.09	141.345	3177.73	779.081	1186.34	507.356	691.992	257.488	2207.13	24.447	2984.24	362.828	96.3091	507.767	2446.7	1991.35	1051.84	1306.95	178.628	827.16	898.916
ALOX5AP	241	567.774	392.796	1005.47	280.692	607.516	185.567	332.371	146.303	904.494	12.0192	485.468	45.3967	444.085	83.293	117.475	127.381	244.419	415.59	395.894	166.62	307.546	415.298	327.765	238.886	9.3132	1071.22	307.411	92.8489	94.6602	488.554	367.973	207.849	38.1139	58.5421	485.597	445.719
ALOXE3	59344	9.7986	65.1801	30.6308	3.2702	10.3319	24.9141	7.8991	49.2921	2.4969	9.0144	44.1335	3.3941	1.8504	15.9806	54.9117	7.9946	2.5513	9.7996	0.9775	4.8135	5.6953	11.807	8.6406	43.9668	2.3283	76.7863	8.3649	64.0138	72.8155	12.3684	1.5725	74.1279	25.735	38.2775	20.9877	29.914
ALPI	248	1.6331	0	0	408.23	0	1.7182	7.2915	0	0	0	0	0	0	0	0	24.5168	19.9005	0	44.477	0	0.4746	0	0	0.977	30.2678	0	0	0	0	0	6.2901	0	0	12.7592	0	0
ALPK1	80216	406.097	431.103	582.959	639.869	424.125	326.461	232.113	293.655	708.489	240.986	238.967	282.138	439.921	424.697	805.221	264.888	446.486	558.575	291.3	135.518	472.235	310.575	216.014	134.832	76.8335	382.036	383.218	408.881	513.107	725.241	398.375	293.605	246.274	454.452	365.844	422.784
ALPK2	115701	57.7028	39.4511	161.42	15.806	668.991	77.3196	25.5203	100.157	737.203	9.6154	53.2831	15.6979	177.634	40.1937	35.5576	22.3849	10.2054	298.886	23.9492	448.764	66.4452	220.739	19.0092	1127.5	4.6566	545.088	187.165	53.0565	1178.64	22.4881	1573.58	31.0078	12.3789	901.773	165.844	34.8997
ALPK3	57538	919.978	174.957	219.278	66.4941	109.002	5693.3	1005.01	142.108	84.2697	1470.55	93.6491	161.646	110.559	3992.74	530.663	2731.49	392.907	245.434	299.609	191.428	189.369	84.1889	115.783	2179.78	913.853	160.683	586.59	181.084	1611.65	274.917	156.205	224.322	171.35	344.122	1986.01	597.781
ALPL	249	319.543	136.649	104.534	225.099	106.935	25.7732	397.995	1105.4	1224.09	112.981	567.815	246.924	113.334	28.5714	66.1641	20.253	606.2	714.922	62.5611	569.101	408.163	28.2341	47.235	22.9604	3135.04	59.7227	627.892	715.686	16.5049	235	122.133	147.287	9.447	6546.21	283.951	106.693
ALPP	250	65.3239	0.5718	1.4586	1.0901	0	0	0	0	0	0	0	0	0	2.4213	3.1507	0	140.834	0	1.4663	0.3703	0.4746	0.5133	0.576	0	8.149	0	1.5684	0	0.4854	1.1244	1.0484	0	0.6515	0	0	0
ALPPL2	251	4.3549	0	0	7.0854	0	0.8591	0	0	0	0	0	0.4243	0	0.9685	0.4501	0	161.755	0	0	0	0	0	0	0.977	9.3132	0	0	0.5767	0.4854	0.5622	0	0	0.3258	0	0	0
ALS2	57679	570.495	651.801	533.852	572.285	702.57	358.247	343.916	721.552	210.986	756.01	740.043	1002.97	867.815	1031.96	941.15	1598.39	803.164	862.361	1050.34	1084.14	831.989	806.981	440.092	680.997	882.421	541.77	727.225	700.115	986.408	988.351	1232.87	794.574	705.595	1341.21	756.379	475.134
ALS2CL	259173	611.323	740.995	2471.37	440.932	479.401	899.485	515.874	583.639	1173.53	1103.37	523.143	1476.03	823.407	774.818	681.445	667.816	1174.64	314.922	1104.59	405.073	1026.1	719.199	751.152	1074.26	1646.1	823.32	835.969	1112.46	1449.51	821.939	781.549	429.264	2400.85	712.262	654.732	395.363
ALS2CR11	151254	1.0887	2.287	4.3758	8.7205	34.0953	1.7182	1.2153	1.0488	1.2484	3.6058	1.0764	31.8201	46.7214	11.6223	5.4011	11.1924	10.2054	14.6993	26.393	18.8836	77.3612	3.5934	0.576	1.4656	4.6566	1.896	10.4561	62.8604	7.2816	76.4595	13.1044	9.2054	46.9094	21.0151	104.115	3.49
ALS2CR12	130540	1.0887	0.5718	4.862	2.1801	2.583	0.8591	1.8229	1.0488	3.1211	2.4038	0.5382	2.1213	12.0273	7.2639	16.6535	2.6649	0.5103	5.7906	2.4438	1.4811	3.3223	1.0267	0.576	2.4426	1.1641	5.6879	1.0456	1.1534	1.4563	3.3732	3.6692	7.7519	0.9773	1.1258	5.3498	1.4957
ALS2CR4	65062	298.857	236.707	346.663	65.404	845.667	121.134	187.149	558.993	94.2572	649.038	673.843	583.793	383.948	819.37	534.264	485.539	542.926	510.022	546.921	449.875	353.583	489.733	156.682	418.173	309.662	303.353	467.913	295.848	660.68	422.776	816.669	344.961	227.054	381.649	201.235	467.157
ALS2CR8	79800	120.849	108.633	160.934	120.452	143.097	115.12	23.0898	128.998	170.412	48.0769	105.49	140.433	238.696	252.785	124.677	224.915	121.954	119.822	170.577	83.6805	209.777	50.8214	40.3226	20.0293	86.1467	166.844	127.042	194.925	133.981	69.7131	208.623	106.589	179.819	162.492	131.687	48.361
ALX1	8092	3.2662	0.5718	0.4862	14.7159	0.5166	0.8591	0	0	0	5.4087	0	0	0.9252	0	0	0	0	0.4454	0	0	1.4238	0	0	0	0	0.474	2.614	0.5767	2.4272	1.1244	0	4.845	0.6515	0	0.823	0.9971
ALX3	257	40.2831	9.1481	22.8516	11.4457	19.6306	62.7148	43.7491	8.9145	36.829	12.0192	15.07	21.6377	42.0955	51.816	22.0547	7.9946	46.9448	15.5902	26.8817	84.0507	45.0878	9.7536	11.5207	11.7245	9.3132	7.5838	14.6386	9.2272	78.1553	16.8661	141.004	14.5349	11.4016	25.1431	16.4609	15.9541
ALX4	60529	1.6331	1.1435	0.4862	0	0	0	0	4.7195	0	0	0	0	97.6061	0	0	0	0	0	0	0	0	0	0.576	0	1.1641	34.1273	0	0	0	0	0.5242	2.907	0	0	0	0.4986
AMAC1	146861	0	0	0	0	0.5166	0	0	0	3.1211	0	0	0	0	0	0	0	0	0	0	0	0	0	0	0	0	0.474	0	1.7301	1.4563	0.5622	0	0	0	0	0	0
AMAC1L2	83650	2.1775	2.8588	0.9724	1.0901	0.5166	1.7182	0.6076	0	10.6117	4.2067	0	2.1213	0	2.4213	0	0.533	10.7157	2.2272	2.9326	1.8513	0.9492	2.0534	1.1521	1.9541	1.1641	1.422	1.0456	3.4602	0.4854	4.4976	2.0967	0.969	13.0304	1.8763	1.2346	0.9971
AMAC1L3	643664	0	0	0	1.0901	1.5498	0	0	0	0.6242	0	0	1.6971	1.3878	1.4528	1.3503	0	1.5308	0.8909	0	0	0.9492	0	0	0.4885	0	0	0	0.5767	0	0.5622	0	0.969	0.3258	0	0.4115	0.4986
AMACR	23600	195.972	1934.82	524.128	6665.21	1189.72	3102.23	2772.6	1421.6	121.723	1404.45	2048.44	387.357	462.588	624.213	901.992	683.805	505.166	821.381	508.798	590.947	673.944	250	981.567	2199.8	791.618	494.845	1007.97	4597.46	573.786	516.101	2572.14	954.457	275.592	444.319	357.202	450.206
AMBN	258	0	0.5718	0	0	0	0.8591	0	0	1.2484	1.2019	0.5382	0	0.4626	0	0	0	1.0205	0.4454	0	0	0	0	0	0	0	1.422	0	0	0.9709	0	0	0	0	0	0	0
AMBP	259	149.156	489.994	2940.56	64.859	1489.35	7788.66	4295.91	21853.7	3.1211	4161.06	10840.7	10546.5	26924.9	9442.13	217.396	560.155	731.216	375.056	5897.85	23508.3	12552.4	24878.9	41041.5	37291.6	101354	43.1331	40978.2	20531.7	18511.2	581.317	1722.97	2192.34	7117.84	10384.5	6575.72	2741.12
AMBRA1	55626	913.446	967.982	950.043	855.157	624.564	955.327	500.076	744.101	750.312	355.168	974.166	717.862	900.659	441.162	1171.15	1013.18	793.469	1039.2	584.555	565.399	546.749	819.815	740.207	756.229	657.742	848.442	504.509	428.489	1005.34	711.186	1054.12	678.779	817.005	997.092	1007.41	675.059
AMD1	262	1184.54	927.959	1101.66	2055.32	2252.87	2145.19	1376.27	1714.74	1066.08	1528.17	992.826	1471.79	1349.83	1174.33	1640.6	781.872	2431.3	1149.36	1000.37	1485.14	1642.62	1267.45	733.295	1309.23	1039.34	1137.21	1265.61	1340.21	1650.97	1388.64	1168.14	927.81	715.941	1150.95	1440.74	2625.95
AMDHD1	144193	10.343	5.1458	4.3758	1.0901	15.4979	0.8591	0	337.179	21.8477	212.74	355.759	48.7908	5.0885	228.571	12.1526	14.9233	40.8215	280.624	58.651	367.305	227.812	20.0205	39.7465	18.0752	831.199	59.7227	290.681	206.459	225.243	3.3732	20.4429	48.4496	10.0985	46.9087	313.992	21.4384
AMDHD2	51005	459.995	580.903	426.143	652.034	361.715	839.347	729.528	704.19	618.689	765.024	580.807	246.076	367.013	328.475	775.969	264.595	231.601	388.428	286.901	419.809	372.273	483.619	618.629	818.911	239.627	283.446	359.692	527.088	646.223	375.838	429.186	676.405	288.984	93.4422	356.012	470.487
AMELX	265	0	0	0	0	0	0	0	0	0	0	0	0	0	0	0	0	0	0	0	0	0	0	0	0	0	0	0	0	0	0	0	0	0	0	0	0
AMELY	266	0	0	0	0	0	0	0	0	0	0	0	0	0	0	0	0	10.2054	0	0.4888	0.3703	0	0	0	0	0	0	0	0	0	0	0	0	0	0	0	0
AMFR	267	2566.14	4563.18	3390.3	5328.79	2431.1	4612.54	2685.1	6387	2458.8	4667.67	4691.07	1823.5	4328.9	4385.96	4790.37	2430.89	1155.76	3001.34	2272.73	2672.59	2848.13	1925.05	5105.41	4631.66	5117.58	4634.67	4617.96	5079.58	3863.59	1383.02	3895.69	1825.1	3022.4	3331.27	3051.85	3322.45
AMH	268	9.2542	293.31	6.8069	16.351	16.0145	10.3093	306.851	27.268	8.7391	321.514	523.143	10.1824	30.0682	285.714	43.2092	33.5773	1.0205	43.6526	96.2854	19.2539	80.2088	7.7002	178.571	11.7245	3.4924	156.417	16.207	111.303	11.6505	78.1461	1.5725	32.9457	48.5382	0.7505	4.5267	4.4871
AMHR2	269	2.1775	0.5718	12.6413	2.7252	0	0	3.0381	0.5244	0	1.2019	0.5382	0	0	0.4843	0	1.0659	0	0.4454	0.9775	1.8513	0.9492	1.0267	0	0	1.1641	0	5.2281	3.4602	0	0	0	0.4845	5.2122	0	0.4115	0.4986
AMICA1	120425	653.783	224.7	277.136	96.4709	322.356	48.11	425.946	206.607	1839.58	47.476	121.098	26.7289	484.33	30.0242	100.371	101.798	55.1091	83.2962	235.582	143.293	449.929	263.86	122.696	79.1402	19.7905	184.382	475.232	106.113	89.3204	59.0312	106.932	28.1008	15.9622	69.4249	269.959	196.435
AMIGO1	57463	51.7148	30.8748	51.0514	40.3325	97.12	30.9278	35.8499	29.8899	56.804	49.2788	104.413	66.6101	143.865	91.0412	147.181	20.786	35.2086	89.5323	136.852	53.6888	46.5116	119.097	94.47	101.124	4.6566	51.6649	75.2843	32.2953	111.165	52.847	155.681	66.8605	44.629	320.48	186.008	23.4326
AMIGO2	347902	2865.54	149.8	701.583	218.013	295.493	347.079	92.3591	91.7672	475.655	12.0192	113.563	66.6101	85.5788	44.5521	75.6161	57.5612	363.822	179.938	140.762	398.408	123.873	211.499	67.9724	440.645	153.667	126.081	111.358	65.7439	334.466	199.582	38.265	291.667	130.63	235.639	218.518	1222.49
AMIGO3	386724	53.3478	109.205	71.9582	61.5888	87.3047	62.7148	125.778	48.7677	169.163	88.9423	130.248	82.308	109.633	82.8087	38.7082	105.529	75.5198	40.5345	66.4712	84.7913	71.6659	33.8809	76.0369	78.6517	74.5052	50.7169	63.7825	65.1672	106.311	48.9116	108.505	92.0543	86.0005	94.9432	49.7942	98.2176
AMMECR1	9949	370.169	245.283	366.112	636.054	382.281	229.381	125.171	397.483	241.573	217.548	164.155	291.048	445.935	301.211	166.535	320.317	633.244	394.655	474.096	804.221	339.345	322.895	163.595	216.903	143.19	184.856	257.221	246.828	299.029	405.348	328.659	446.705	246.274	244.301	393.827	315.094
AMMECR1L	83607	870.441	929.102	589.279	519.417	992.897	858.247	487.923	968.537	652.31	730.168	533.369	1137.04	849.312	819.37	788.117	786.669	835.821	835.189	930.596	868.277	1065.97	725.359	626.728	607.23	781.141	910.534	683.309	668.397	921.845	1270.58	937.23	991.764	816.027	852.613	880.247	627.695
AMN1	196394	183.996	177.816	401.118	134.623	188.041	243.127	182.288	104.352	428.839	156.851	186.222	148.918	178.096	220.339	99.9212	167.354	278.607	116.704	155.425	152.55	103.465	155.031	103.111	178.31	227.008	71.5725	165.207	76.7013	117.961	159.665	112.698	274.225	159.622	139.6	176.132	129.627
AMN	81693	82.7436	64.6083	857.664	2374.17	13.9481	128.866	1824.7	433.141	35.5805	1397.24	26.3724	2.1213	217.416	173.366	99.4711	356.559	89.2971	153.675	85.044	46.2834	209.302	37.4743	1034.56	368.832	0	132.717	145.863	5371.97	479.126	37.6675	1281.61	166.667	1.9546	1.1258	140.329	48.8595
AMOT	154796	431.138	355.632	175.52	1444.34	416.893	615.12	151.299	481.909	79.2759	176.082	298.708	272.38	133.225	511.38	472.6	244.102	1257.81	604.009	411.535	256.595	438.538	377.823	222.926	131.412	33.7602	210.925	104.561	344.867	298.058	576.819	262.613	317.829	249.857	88.5637	329.218	122.647
AMOTL1	154810	1278.72	951.973	1053.12	288.323	1175.77	787.801	984.961	613.005	323.346	595.553	541.981	1546.88	1575.58	1497.34	415.438	734.971	551.601	779.51	1345.06	2098.68	2781.21	1091.89	1360.02	372.252	1514.55	1576.49	430.271	903.114	1076.21	1399.32	1790.07	547.965	1943.81	631.954	947.737	843.076
AMOTL2	51421	2445.29	4560.32	939.346	1263.39	4592.54	1169.24	1055.45	2992.66	262.796	1226.56	1190.53	2137.89	3497.17	1144.79	1497.92	1247.69	1087.38	857.461	1403.71	1483.29	1696.73	1540.55	697.005	1134.83	457.509	5870.36	1329.5	2980.39	1776.7	1263.27	1373.35	2242.25	1726.53	1086.41	1072.84	1128.75
AMPD1	270	64.7795	2.8588	5.8344	5.4503	6.1991	0	0	0	53.0587	0	0	0	18.5035	0	0.4501	0	0	0	30.7918	1.4811	7.1191	0	0	0	0	1.422	1.0456	0	0	0	0	0.969	0.3258	0	0.823	0.4986
AMPD2	271	1098.53	1107.49	1049.71	2200.3	1623.14	1330.76	1642.41	1705.82	1452.56	1212.74	1611.41	1178.62	1719.9	1126.88	1102.28	818.115	991.453	1228.95	1361.68	2351.57	1478.41	2130.9	1714.86	1440.16	236.321	855.552	1356.69	1299.31	1427.18	1864.82	1337.18	1879.85	537.503	1007.97	1844.86	1964.35
AMPD3	272	337.507	120.069	388.477	101.921	304.275	376.289	174.996	178.291	1308.99	95.5529	190.527	177.768	310.397	141.889	571.171	571.881	252.583	195.1	288.856	228.825	479.829	177.618	741.936	834.392	62.8638	164.948	313.162	212.803	577.67	327.202	303.499	538.275	276.896	130.969	266.255	236.819
AMPH	273	35.9281	58.8908	60.2893	2.7252	179.259	2.5773	6.6839	11.5364	11.8602	0	1.6146	5.0912	61.0616	7.2639	9.9021	6.3957	4.0822	35.6347	13.6852	12.5891	13.7636	5.6468	62.212	2.9311	2.3283	22.2775	5.7509	9.8039	4.3689	6.1842	15.7253	18.4109	31.9244	9.3817	13.1687	3.9885
AMT	275	182.684	72.0412	374.834	340.014	158.802	242.68	578.265	240.383	938.496	198.359	189.806	574.302	421.954	805.186	190.638	501.251	484.154	205.844	472.786	254.055	346.758	172.218	175.922	634.03	349.243	186.762	623.688	210.185	467.17	69.1509	563.072	365.528	475.57	210.598	427.621	127.1
AMTN	401138	0.5444	0	0	0	0.5166	0	0	0	0	0.601	0	0	0	0	0	0	0	0	0	0	0	0	0	0	0	0	0	0	8.7379	0.5622	0	0	0	0	0.4115	2.4928
AMY1A	276	4.3549	14.2939	3.4034	5.4503	8.2655	7.732	43.1414	2.0975	45.568	19.8317	4.8439	2.5456	4.6259	21.3075	3.1507	4.2638	6.6335	7.5724	12.219	1.8513	1.4238	56.9815	35.1382	0.977	68.6845	2.3699	12.0246	3.4602	3.8835	3.9354	13.1044	8.2364	5.2122	2.2516	1.6461	1.9943
AMY2A	279	1.0887	5.7176	120.092	2.1801	0.5166	6.8729	15.1906	0.5244	9.3633	5.4087	0.5382	0.4243	1.3878	4.8426	0.4501	1.0659	3.5719	4.0089	2.9326	0.7405	1.8984	9.7536	5.1843	0	45.4016	1.896	3.1368	2.8835	3.3981	2.2488	3.1451	1.938	1.9546	0.3753	0.4115	0.9971
AMY2B	280	147.583	968.834	333.866	177.937	444.345	766.314	812.061	77.0477	1105.42	315.222	62.4327	219.571	676.285	1198.79	261.933	184.931	551.984	497.483	878.48	313.106	364.124	1594.88	1047.63	100.611	2447.93	298.746	688.632	408.604	694.995	326.982	1080.5	914.598	352.657	136.208	95.6091	105.507
AMZ1	155185	12.5204	2.8588	16.0447	1.0901	7.2323	1.7182	0	1.0488	24.9688	1.8029	2.1529	6.7883	5.0885	4.8426	4.0509	6.3957	18.88	9.7996	13.1965	8.5162	6.1699	6.1602	1.1521	15.6326	39.5809	11.8497	5.7509	2.8835	26.2136	28.1101	4.1934	5.3295	5.2122	0.7505	3.2922	3.9885
AMZ2	51321	1083.29	1264.15	754.588	1104.24	1373.11	1109.97	1240.16	1942.84	1332.08	641.226	1574.81	705.558	1052.85	1097.82	855.632	1104.32	1349.15	831.18	651.515	861.612	633.128	720.226	1346.77	1637.03	492.433	1345.66	1026.27	1143.02	1250.49	771.903	984.406	2541.67	807.883	788.066	1201.23	1604.89
AMZ2P1	201283	180.73	170.955	119.12	95.3808	130.699	174.399	357.284	156.266	345.193	117.788	269.107	106.916	203.076	397.094	72.4654	116.721	269.932	110.468	96.7742	88.1237	165.164	111.91	153.226	387.885	102.445	129.873	135.93	123.991	131.068	68.5886	231.686	274.709	200.668	52.5378	155.967	158.544
ANAPC10	10393	109.962	124.071	146.347	122.632	77.4893	68.7285	77.7761	97.011	107.366	115.986	55.436	84.8536	57.8235	106.537	96.3205	69.8196	72.4582	99.7773	92.8641	69.24	80.6834	115.503	38.0184	70.8354	64.0279	62.0927	82.0808	95.1557	89.3204	87.7035	69.1915	54.7481	92.8414	103.95	87.2428	137.604
ANAPC11	51529	1437.13	1516.3	1455.69	1171.28	1190.75	1044.67	3157.22	1291.56	1266.54	1858.17	2462.33	723.377	758.182	1099.76	908.743	888.467	2421.74	642.316	950.147	957.141	727.575	1298.25	2250.58	1587.69	1419.09	1534.31	1288.2	1403.69	1137.38	767.406	1160.53	1922	1229.09	976.452	819.342	1678.18
ANAPC13	25847	1241.9	1178.53	1188.13	1020.33	1136.32	1620.54	1277.84	1014.23	936.573	1372.11	1432.66	741.048	1148.23	384.944	803.911	1385.64	1471.42	762.713	712.776	825.274	840.114	867.916	779.487	1523.97	1841.75	1472.1	1103.25	1595.08	810.714	902.559	609.687	1177.81	668.732	1265.05	440.263	1018.31
ANAPC16	119504	2722.37	2686.11	1591.35	2683.74	1902.11	1701.89	2686.31	2015.73	4996.25	1209.74	2990.31	4384.81	2108.01	2484.75	2194.67	2943.61	2959.56	2825.84	1383.19	1537.35	1696.25	1908.11	2343.32	2382.02	2369.03	2690.37	2421.12	3175.32	1916.99	1922.73	1408.99	1928.29	3814.64	2433.62	1835.8	1366.57
ANAPC1	64682	433.86	567.753	473.077	520.507	697.404	386.598	177.427	1047.72	397.004	233.774	544.672	921.086	715.624	376.755	626.533	844.23	742.442	701.559	830.889	605.387	625.059	338.296	362.327	404.494	387.66	580.638	386.877	380.046	566.019	821.377	679.334	641.957	608.193	505.113	653.498	485.105
ANAPC2	29882	613.5	826.186	706.454	729.255	748.03	651.203	1209.78	595.176	1775.91	863.582	1298.71	1070.43	1321.61	624.697	475.751	627.843	784.284	602.673	719.941	636.49	703.844	1432.24	1097.35	717.147	1030.27	934.708	860.018	561.13	609.223	422.214	663.085	523.74	773.679	755.043	465.432	818.646
ANAPC4	29945	338.596	712.407	703.051	358.087	762.495	468.213	726.113	350.288	1104.24	615.385	511.841	560.883	734.127	636.804	401.935	618.25	385.253	567.038	707.722	401	467.489	502.567	846.774	345.384	764.843	524.233	574.565	354.095	484.466	470.563	355.392	753.876	499.389	506.989	356.379	503.552
ANAPC5	51433	2735.98	2010.86	1713.87	2245.54	3093.89	1845.36	2974.33	1916.62	3866.42	2703.73	3282.56	2136.19	3124.78	3035.84	1316.53	2205.45	2156.4	3946.55	2549.36	2733.69	2653.06	3760.27	2280.53	3137.27	2715.95	1618.68	2093.84	2158.59	2209.22	2257.8	2192.64	3771.32	1272.42	2176.56	2319.75	2584.57
ANAPC7	51434	939.575	975.414	661.237	896.58	979.465	451.89	1164.21	725.223	1421.97	1875.6	1304.09	975.817	1203.65	1180.15	478.902	1119.24	1187.4	1203.56	1393.94	1155.6	945.42	1482.55	1146.89	1248.17	1536.67	511.435	722.52	740.484	1037.86	1095.17	823.483	1204.46	501.995	831.598	992.593	1552.54
ANG	283	269.2	476.815	702.769	1196.8	267.059	1430.92	924.205	1818.45	160.986	728.534	1764.82	111.939	466.525	345.671	455.902	43.0057	293.236	235.537	318.182	765.854	1100.52	1021.36	946.82	340.23	6727.25	454.736	3827.22	2550.97	545.709	221.553	486.778	700.669	433.038	210.571	541.259	244.836
ANGEL1	23357	658.138	160.663	468.214	314.484	279.995	262.887	121.525	213.949	498.127	319.712	180.84	509.122	353.417	452.3	318.218	633.706	1421.1	469.042	394.917	1465.52	441.861	253.08	154.378	310.699	424.913	221.353	269.769	360.438	293.689	443.015	221.203	265.019	201.645	338.118	215.226	398.355
ANGEL2	90806	415.351	570.612	416.191	584.821	689.139	339.347	504.329	489.25	787.141	536.058	348.762	1126.43	765.583	878.935	486.103	1447.02	787.856	672.606	858.749	500.602	842.43	627.823	355.415	380.068	779.977	544.14	751.274	600.346	503.884	893.339	872.232	843.508	942.748	449.573	852.675	481.117
ANGPT1	284	135.003	14.2939	41.3273	68.1292	37.7115	8.5911	23.6974	37.7556	13.1086	5.4087	14.5318	49.6394	86.504	9.201	77.8665	14.3903	19.9005	60.1336	123.167	30.3619	100.142	3.0801	14.977	9.2819	20.9546	7.1098	63.7825	39.2157	57.767	35.9809	27.7814	18.4109	24.7577	114.832	43.2099	144.086
ANGPT2	285	433.315	179.531	260.605	539.038	92.4706	170.103	73.5227	79.182	236.579	24.0385	27.4489	267.289	55.9732	191.283	128.277	290.471	67.8658	372.383	339.687	416.181	79.2596	86.2423	169.931	229.116	55.8789	112.81	68.4878	155.133	395.631	419.403	68.6673	192.829	231.615	142.227	195.473	346.504
ANGPT4	51378	0.5444	1.1435	0.9724	0	0	0	6.0763	0.5244	1.2484	0	0	0.4243	0.4626	0	0	0	0	0.4454	1.4663	0	0.9492	0	0	0	1.1641	0.474	0	2.8835	0.4854	0	0.5242	0.4845	0	0.3753	0.823	0.4986
ANGPTL1	9068	235.166	316.181	88.4891	15.806	1373.63	9.4502	178.034	72.365	42.4469	60.6971	17.2228	15.2737	547.704	11.6223	70.665	10.1265	37.2496	43.2071	325.024	58.8725	6047.46	5.1335	2002.88	121.153	22.1187	20.3816	1022.09	2211.65	364.563	12.9306	50.8452	9.6899	14.9849	10.8828	122.634	14.4584
ANGPTL2	23452	1880.78	608.919	1467.85	512.876	380.731	323.024	242.443	612.48	303.371	32.4519	182.454	693.254	416.329	215.981	350.625	455.693	202.067	1101.56	1024.93	679.071	682.012	237.166	309.332	155.349	143.19	642.73	611.685	546.713	513.592	710.061	124.754	274.225	527.079	180.88	546.091	615.231
ANGPTL3	27329	0	23.442	3.4034	0.545	40.2945	0.8591	2.4305	2360.25	0	54.0865	827.772	15.6979	703.134	10.6538	4.9511	11.7254	25.5135	0.4454	4.8876	1311.86	702.42	21.0472	55.8756	420.615	2300.35	0.948	2198.41	643.022	38.3495	3.9354	256.847	392.442	0	92.3164	441.152	14.957
ANGPTL4	51129	1048.45	604.345	5456.18	978.335	42.3608	190.722	2308.37	792.868	279.65	214.543	540.904	112.855	365.907	2411.62	641.836	756.29	257.686	487.305	870.479	575.025	1295.68	1226.9	1316.82	616.512	3563.45	3800.45	2141.42	3520.18	991.748	297.967	398.899	1519.38	437.495	872.877	5689.71	2723.17
ANGPTL5	253935	0	0	1.4586	0	0.5166	0	0	0	0	0.601	0	0	1.8504	0.4843	0	0	0.5103	0	0.4888	0	0	0	0	0	0	0	0	0.5767	0.4854	0	0	0	0.3258	0.3753	1.6461	0
ANGPTL6	83854	9.5536	7.9874	9.4664	8.2682	8.8544	3.1787	17.6698	101.379	606.529	0	86.6093	0.5091	13.9794	0	3.7853	0.6556	10.7463	5.4031	7.3118	64.8338	87.4276	1.2988	0.7892	6.8686	47.7183	7.7592	46.6344	21.2572	4.9272	2.6929	12.1976	6.4002	2.0425	0.4691	47.4362	2.4878
ANGPTL7	10218	1.0887	0	1.4586	0	3.0996	0	0	1.0488	0	0	0	0	0	0.4843	1.3503	0.533	0.5103	0	1.4663	0	1.4238	0	0	3.4196	0	0	0	0.5767	0	0	2.0967	0	0	0	16.0494	0
ANK1	286	184.54	17.7244	42.2997	15.2609	49.0766	427.835	448.428	3.1463	171.66	13.8221	0.5382	27.5774	149.416	3.8741	11.2524	35.7092	8.6746	4.8998	12.7077	14.0702	25.6289	3.5934	8.0645	7.8163	11.6414	2.3699	16.207	10.9573	16.9903	40.4785	3.1451	32.4612	266.797	38.6528	83.5391	198.429
ANK2	287	246.598	102.916	99.1856	5.9954	264.497	10.3093	132.462	90.194	622.347	88.3413	55.9742	17.8193	186.423	10.1695	91.8195	53.8303	7.1438	190.2	1246.82	22.9566	782.155	437.885	10.9447	9.7704	1.1641	155.943	155.797	581.315	21.3592	371.053	6.8143	1237.89	61.5685	14.2602	294.239	221.364
ANK3	288	585.193	381.933	426.887	2862.52	199.406	329.897	376.728	275.826	161.049	3158.65	532.293	1029.7	245.172	2063.92	645.437	513.787	623.549	2059.69	721.896	224.382	1702.9	628.85	410.714	142.648	88.475	693.447	1079.6	1344.87	1651.94	1041.2	229.066	135.659	165.811	1250.4	613.58	265.237
ANKAR	150709	31.5732	58.8908	32.5757	20.1662	36.1617	48.11	18.2288	45.6214	64.9189	28.8462	31.2164	92.4905	49.9595	89.1041	71.5652	93.2704	47.9653	57.9065	36.6569	31.843	72.6151	22.5873	21.8894	13.6786	18.6263	60.1967	59.0772	57.0934	63.1068	93.8877	63.4255	62.5	75.9019	54.0388	52.2634	14.957
ANKDD1A	348094	230.267	70.3259	60.7755	57.2285	73.8732	89.3471	204.162	24.1217	475.655	165.865	61.3563	38.6084	119.81	136.077	174.187	84.7428	80.6225	176.392	92.3754	45.5429	75.9374	107.803	54.7235	55.6913	31.4319	107.122	122.86	58.2468	89.8058	106.818	116.367	62.9845	69.7125	84.0604	103.704	57.3352
ANKFN1	162282	7.6211	0	33.5481	0	0	0	0	0.5244	0	0	0	0	0	0	0	1.0659	9.6951	0	1.4663	1.1108	0	5.1335	0	0	0	7.1098	0	0	0	0	2.0967	0.969	0	0	0.4115	3.49
ANKFY1	51479	955.362	1654.66	1080.83	830.086	1207.8	1028.35	1019.6	1035.66	1229.71	1370.79	790.635	1754.35	1556.61	1403.39	1988.07	1568.01	2026.28	1468.15	1652.98	953.439	2008.54	970.739	1349.08	763.068	1909.2	818.106	1469.61	1331.6	1628.16	1652.31	2238.76	1324.13	1275.35	1995.68	1449.38	1381.53
ANKH	56172	3921.07	1130.93	2087.76	1438.34	3793.36	1106.53	525.596	2395.91	891.386	521.034	790.635	2201.1	3154.85	1364.16	1643.3	646.497	1688.48	2626.28	1115.35	1148.94	1716.18	1209.45	1329.49	1055.69	5504.07	1818.22	1284.54	806.805	1431.55	2855.42	2921.24	772.771	1389.36	2720.33	1505.76	1387.01
ANKHD1	54882	1277.41	1262.29	1489.58	1061.36	2267.33	2000.89	896.582	1644.68	1570.71	990.932	1518.99	1867.22	2484.69	1537.37	3395	1781.36	1477.83	2054.12	1550.15	2043.48	2116.03	1169.75	920.939	1173.62	3458.72	1900.48	1360.31	848.172	1433.8	1787.37	2439.51	1243.51	1577.24	2041.71	1745.3	935.062
ANKHD1-EIF4EBP3	404734	599.635	1270.7	731.275	768.214	2103.65	470.661	329.534	1209.57	884.825	384.219	557.287	516.092	822.445	413.472	1320.59	1287.78	394.239	1832.5	461.97	1779.46	593.859	323.835	803.733	770.909	532.701	700.822	620.682	1033.9	1252.86	579.726	1156.23	1397.41	246.737	1405.06	769.082	656.632
ANKIB1	54467	915.079	966.838	3142.82	1373.48	1655.69	894.33	300.775	1244.89	543.071	1174.28	976.319	1037.34	2151.5	613.559	1538.88	1032.9	1451.21	1285.97	1261.49	1141.16	1363.55	649.384	479.839	1360.53	424.913	1262.71	737.681	1276.24	868.447	1139.02	1649.06	1284.88	874.338	1053.01	1233.33	926.835
ANKK1	255239	27.7627	3.4305	20.9068	8.1755	4.6494	3.4364	40.7109	2.6219	196.005	6.0096	9.1496	13.1523	5.0885	58.1114	4.501	14.9233	27.0443	17.8174	5.3763	8.8864	28.0019	9.7536	19.5853	0.4885	2.3283	0.948	7.8421	9.8039	16.0194	15.1795	4.7176	23.7403	9.7728	0.3753	2.8807	0.9971
ANKLE1	126549	14.6979	10.8634	7.7793	4.9053	13.9481	3.4364	19.444	6.817	117.978	16.8269	5.9203	2.9699	12.0273	20.8232	1.8004	1.0659	6.1232	4.0089	30.7918	10.7378	16.1367	7.7002	9.2166	9.7704	8.149	6.1619	10.4561	14.4175	17.9612	7.3086	17.2979	14.0504	2.9318	7.8807	14.8148	7.9771
ANKLE2	23141	1468.15	1483.13	1310.81	1188.17	3928.19	1463.92	1368.37	1307.81	2418.85	1954.33	2348.22	1626.64	2660.81	2492.98	955.103	1588.26	1595.61	3540.31	1956.01	3295.38	1059.8	3645.79	3130.76	2403.03	1020.95	1212.47	1202.98	1434.83	4270.39	2863.86	1593.5	3747.09	857.725	1258.65	2568.72	2683.78
ANKMY1	51281	226.168	328.759	271.788	158.06	263.98	134.021	365.791	248.034	614.856	251.202	287.406	332.626	396.901	726.876	336.221	300.064	465.876	186.191	298.632	221.79	300.902	199.179	327.765	162.189	231.665	365.446	300.614	407.151	287.379	335.072	189.228	284.399	308.168	185.758	227.572	105.198
ANKMY2	57037	375.612	377.358	622.827	569.56	293.426	268.9	204.162	333.508	249.688	233.774	506.997	610.946	257.662	307.506	467.649	408.258	464.345	356.347	262.463	242.155	262.933	320.329	262.673	484.123	451.688	437.493	331.983	309.689	177.185	196.771	343.336	518.411	414.366	276.199	240.329	254.768
ANKRA2	57763	214.48	302.459	216.361	261.071	191.14	276.632	100.866	228.631	317.728	180.889	337.46	134.493	294.669	284.262	204.793	198.266	155.122	296.214	225.806	244.006	228.287	137.577	141.129	235.466	558.789	199.55	211.737	189.735	306.796	162.476	152.012	306.202	270.706	381.649	206.173	149.071
ANKRD10	55608	2819.11	2585.93	3551.05	3527.46	2458.3	3096.22	2430.5	1360.57	4542.43	1936.9	749.403	9529.33	1329.72	8348.02	1169.39	2482.87	4340.35	2537.28	3796.23	3343.21	3340.83	2508.21	2308.18	1229.52	1662.04	2132.71	2392.37	3035.33	3612.14	5084.38	2669.79	3448.84	9987.62	1191.96	1776.24	1611.87
ANKRD11	29123	2850.88	3337.3	2910.33	4393.99	2913.17	1494.92	1947.82	3681.74	3208.78	3155.13	2493.62	1902.56	3364.29	2737.41	3047.15	3128.37	2918.69	1505.72	3551.02	2925.17	3011.96	1329.06	3056.08	2110.16	2081.75	4096.85	2036.29	3039.52	3514.77	1702.92	2814.27	2774.58	2443.97	2239.72	2389.04	2831.54
ANKRD12	23253	701.688	839.909	868.846	716.174	772.311	1102.23	342.093	748.82	1260.3	637.019	233.046	941.875	1153.23	717.191	766.963	796.796	495.982	755.457	880.254	1216.7	1144.28	646.304	244.24	553.981	749.709	931.864	702.13	729.527	891.748	839.93	845.499	607.558	421.858	1262.41	811.111	464.166
ANKRD1	27063	1657.59	823.899	82.1685	5.9954	759.396	70.4467	42.5338	4478.76	16.2297	85.9375	1258.34	248.197	488.493	48.4262	3290.65	22.3849	3.5719	175.501	11.2414	496.159	749.407	1569.82	236.175	4112.85	2.3283	3407.51	76.8527	3569.2	4448.06	133.242	871.707	1155.04	475.609	1.5011	1902.88	112.676
ANKRD13A	88455	1111.6	2628.36	679.713	856.793	1917.6	264.605	355.461	681.699	3574.91	399.038	1126.48	584.217	1374.35	1023.24	780.466	515.386	474.04	912.695	903.715	787.929	997.627	1217.15	1264.4	2355.15	1137.37	915.274	735.067	783.16	673.301	607.74	934.085	559.593	1017.02	972.699	1064.61	1318.21
ANKRD13B	124930	126.293	141.795	77.7926	237.089	79.5557	168.385	215.1	81.2795	81.7728	365.385	621.636	96.3089	138.314	196.126	204.343	43.1709	374.027	102.45	547.898	49.2456	130.517	182.238	146.313	13.6786	24.447	347.909	205.986	185.121	257.282	164.163	133.141	117.733	189.266	169.247	571.193	222.859
ANKRD13C	81573	501.905	409.377	453.628	604.442	659.693	778.351	339.663	641.846	464.42	630.409	445.64	581.672	805.366	550.121	611.23	279.811	394.438	804.9	633.431	714.987	467.964	724.846	286.29	395.701	327.125	314.255	477.323	418.108	291.748	713.997	807.758	527.132	351.169	780.561	910.7	471.146
ANKRD13D	338692	732.716	680.389	971.922	581.551	632.313	1153.78	1082.18	544.835	2808.99	985.577	1262.11	749.682	695.733	985.956	517.16	721.114	2883.02	461.915	1015.15	566.88	470.812	1080.6	1158.99	969.223	280.559	667.852	2332.77	602.653	852.913	620.671	600.708	596.415	1052.85	316.728	918.519	1239.94
ANKRD16	54522	154.426	241.064	83.982	117.64	190.014	165.808	388.127	167.278	154.064	418.101	146.19	294.807	254.835	341.777	314.549	376.386	150.019	519.296	282.429	193.154	167.731	327.474	433.479	276.444	202.561	192.26	456.604	226.384	160.194	352.456	129.367	362.243	289.551	364.252	196.876	152.063
ANKRD17	26057	1675.01	2363.64	1649.2	1990.46	1702.18	1592.78	585.751	1354.48	896.38	1272.24	795.479	2293.17	2818.09	1503.15	2059.64	1723.1	1683.38	2328.73	2157.38	1990.56	2338.4	1097.54	1161.87	783.586	932.48	1961.84	1369.76	1707.61	2066.02	2448.95	1523.78	1372.58	1650.3	2922.6	1197.94	1350.62
ANKRD19	138649	188.351	94.3396	13.6137	59.9537	30.9957	46.3918	138.539	24.1217	83.0212	188.101	153.391	40.3055	36.5445	43.5835	45.0096	26.6487	57.6604	99.3318	102.639	28.8809	39.8671	64.6817	51.8433	16.1212	37.2526	118.023	131.225	30.5652	41.7476	48.3494	18.8704	28.1008	115.319	39.7786	125.103	32.4068
ANKRD20A3	441425	4.8993	8.0046	14.5861	8.1755	7.2323	9.4502	1.2153	10.4877	1.2484	6.0096	26.3724	3.3941	3.2381	12.1065	22.0547	11.7254	5.613	40.98	0.9775	0.7405	5.2207	2.5667	2.8802	1.4656	19.7905	7.5838	10.979	1.1534	1.9417	7.8708	3.1451	6.7829	2.6061	1.1258	12.7572	13.4613
ANKRD20A4	728747	0	0.5718	5.8344	1.0901	2.583	0.8591	0	2.0975	1.2484	0	2.6911	0.8485	0.4626	0	6.7514	1.5989	2.0411	0.8909	0	0	0	2.0534	0	0	0	0.948	2.614	0	0.9709	0.5622	2.0967	0.4845	0	0	2.8807	0.4986
ANKRD20B	729171	4.8993	2.287	13.6137	7.6305	3.6162	12.0275	0	14.1584	1.8727	3.6058	9.6878	0.8485	3.7007	5.8111	17.1036	7.4616	2.5513	10.6904	0	1.1108	3.3223	1.0267	2.8802	0.4885	12.8056	10.9018	3.6597	0.5767	1.4563	2.811	18.3462	5.3295	1.9546	0.3753	8.642	4.9857
ANKRD22	118932	1000	75.4717	476.966	33.247	390.546	542.096	18.2288	216.046	69.2884	26.4423	748.654	12.3038	139.239	43.5835	280.86	19.1871	175.533	332.294	251.222	26.289	53.6308	203.285	36.8664	32.2423	0	203.816	72.6702	420.992	38.835	34.2943	31.9748	33.4302	4.8864	809.457	261.728	446.217
ANKRD2	26287	5.988	412.807	0.9724	0	138.964	25.7732	255.81	73.4137	3.7453	61.899	661.464	46.6695	264.138	25.1816	71.5652	4.7968	5.613	1.7817	8.3089	0.3703	134.314	2.0534	278.802	128.969	38.4168	268.752	169.912	399.077	166.019	2.811	19.9188	50.8721	2.6061	1.5011	7.4074	18.447
ANKRD23	200539	41.3718	46.8839	63.6927	40.8775	75.9396	44.6735	57.7244	78.6576	94.2572	108.774	102.799	57.2762	85.1162	144.794	54.9117	30.3795	63.2734	51.2249	61.5836	48.8753	91.5994	70.8419	71.4286	59.5994	71.0128	62.5667	105.607	88.2353	84.9515	107.943	35.1199	38.7597	101.637	39.0281	46.5021	23.9312
ANKRD24	170961	26.6739	88.0503	17.0171	73.0345	33.5787	39.5189	130.032	43.5239	59.9251	79.3269	233.584	75.5197	85.5788	123.971	53.5614	191.871	12.2465	48.9978	49.3646	24.0674	117.228	45.6879	13.2488	41.0357	69.8487	180.116	69.5334	74.9712	84.9515	33.7321	24.1122	119.186	27.6896	78.4314	16.0494	26.424
ANKRD26	22852	120.305	141.224	107.937	89.3855	164.277	75.6014	43.1414	105.401	104.245	122.596	104.952	186.254	286.342	124.455	156.183	269.152	111.749	310.468	130.499	162.177	186.996	50.8214	83.5253	109.428	50.0582	190.07	132.793	136.101	110.194	110.754	65.5222	166.182	105.546	127.216	117.284	98.2176
ANKRD26P1	124149	0	0	0	0.545	1.0332	0	0	0	6.2422	0	0	0	0	0	0.4501	0	0	0	0	0	0.4746	0	0	0.4885	1.1641	0	1.5684	0	0	0	0	0.4845	0.3258	0	4.5267	0.9971
ANKRD27	84079	552.531	906.804	754.102	1057.36	828.619	702.749	331.764	854.746	617.977	663.462	909.042	811.625	689.719	1000.48	1423.65	1413.98	974.104	614.699	669.111	721.281	1316.56	291.581	369.816	432.34	437.718	1959.95	563.587	632.641	632.039	698.817	735.946	698.159	997.15	1420.77	1036.63	592.796
ANKRD28	23243	867.719	560.892	1024.43	903.665	1084.85	386.598	257.633	1279.5	517.478	433.894	630.786	697.921	1275.36	599.516	847.53	427.978	503.125	627.617	659.824	502.453	685.809	460.472	395.161	611.138	554.133	1027.14	673.376	606.69	797.573	882.095	546.193	819.767	790.292	1734.12	639.918	1154.18
ANKRD29	147463	83.8323	287.021	30.1446	8.1755	272.762	320.447	174.996	239.643	524.345	4.8077	114.101	84.4294	762.808	339.952	325.869	248.899	10.2054	262.361	180.352	107.378	327.954	196.099	199.309	315.584	224.68	345.065	142.726	15.5709	14.5631	145.61	150.439	221.899	157.016	26.6442	213.58	349.495
ANKRD30A	91074	0	0	0	0	0	0	0	0	0	0	0	0	0	0	0	0	0	0	0	0	0	0	0	0	0	0	0	0	0	0	0	0	0	0.7505	0	0.9971
ANKRD30B	374860	0	5.1458	0	0	0	1.7182	0	3.1463	0	0	4.3057	0	0.9252	0	7.2015	0.533	0	0	0	0.3703	0	0	0	0	0	0.474	0	0	0	1.1244	0	0.969	0	0	0	0.9971
ANKRD31	256006	0.5444	0	0.4862	0	0	1.7182	0	4.7195	0	1.2019	0	1.2728	1.8504	0.9685	1.8004	9.0606	0	17.3719	1.955	0.3703	10.4414	0	0	0	0	4.7399	4.1825	1.1534	3.3981	2.811	0.5242	3.876	0.9773	4.5032	15.6379	0.9971
ANKRD32	84250	83.288	97.1984	153.154	70.3093	176.676	42.0962	37.0652	112.218	171.66	115.986	174.919	81.0352	112.871	93.4625	103.522	130.046	106.136	147.884	123.167	77.0156	185.097	61.6016	50.1152	63.5076	118.743	108.544	152.66	56.5167	113.107	86.5791	85.9651	84.7868	59.2882	119.336	124.28	139.599
ANKRD33	341405	3.8106	0	0	2.7252	0	10.3093	0	0.5244	0.6242	1.8029	0	0.8485	0	3.8741	1079.78	1.5989	2.0411	0	1.955	0.7405	0.4746	0.5133	0	0	17.4622	0	1.0456	0.5767	0	0.5622	22.0155	0.4845	0.6515	0.7505	43.2099	2.4928
ANKRD34A	284615	33.2063	14.8656	17.5033	25.0715	18.5974	8.5911	3.6458	12.0608	107.99	4.8077	9.1496	14.8494	14.8028	7.7482	7.2015	10.1265	3.5719	16.0356	27.8592	11.4783	21.832	6.1602	12.0968	3.4196	3.4924	18.0116	17.2526	11.534	22.8155	17.9905	5.2418	21.8023	17.591	12.7592	13.9918	84.7563
ANKRD34B	340120	27.7627	0	4.862	0	4.6494	0	1.2153	0	1.8727	0	0	0.4243	0	0	0	0.533	12.7567	2.2272	0	8.5162	1.4238	0	0	0	0	0	0	0	0.4854	0	0.5242	0.4845	0	0	0.4115	0
ANKRD34C	390616	2.1775	0.5718	9.7241	0	0.5166	0	0	0	0	0	0	0.4243	0	0	1.3503	0	0	1.3363	0.4888	0.7405	0	0	0	0	0	0	0	0	0	0	0	0	0	0	0.4115	0
ANKRD35	148741	114.861	16.5809	68.5548	13.0808	16.0145	6.0137	9.722	16.7803	63.0462	0.601	9.1496	19.0921	8.3266	7.7482	4.9511	4.7968	18.3697	20.9354	20.5279	3.3324	17.0859	2.5667	8.0645	4.3967	201.397	7.5838	5.7509	9.2272	14.0777	10.1196	1.5725	2.4225	24.7577	118.585	22.2222	29.4154
ANKRD36	375248	217.746	122.356	214.902	62.6788	157.045	574.742	76.5608	214.997	296.504	188.101	136.706	230.378	305.308	254.721	239.001	174.282	180.125	174.165	174.976	182.172	200.285	166.324	84.1014	122.13	60.5355	206.186	193.439	145.905	249.029	280.539	171.406	177.326	189.918	45.4076	172.839	111.679
ANKRD36B	57730	34.8394	19.4397	12.1551	5.4503	35.1285	31.7869	19.444	18.8778	8.1149	15.024	19.3757	56.8519	57.8235	21.7918	52.6612	28.2476	10.2054	19.5991	29.8143	40.7294	39.3925	8.2136	2.3041	15.1441	3.4924	31.7573	28.7544	14.4175	50.9709	51.1604	29.354	18.4109	31.5987	3.3774	25.1029	8.9742
ANKRD36BP1	84832	51.1704	54.8885	59.3169	59.4086	157.045	350.515	5.4686	114.84	3.1211	12.0192	24.7578	502.758	235.92	42.615	126.927	270.751	111.749	154.12	190.616	212.163	164.214	7.1869	6.3364	8.7934	111.758	63.0406	28.7544	49.0196	86.4078	341.257	250.557	107.558	197.41	240.548	75.3086	38.3896
ANKRD37	353322	93.9194	77.9131	325.411	35.122	19.5376	23.5653	41.7986	34.6827	107.297	6.9892	36.9699	25.5834	29.0274	38.4358	34.3063	65.3053	276.739	49.9955	26.129	66.4556	55.4817	145.919	41.8894	13.4685	82.8172	243.057	25.4398	33.2526	80.5485	61.7804	7.2756	40.0775	38.4038	68.0026	60.177	111.036
ANKRD39	51239	201.415	183.533	159.961	232.729	228.852	272.337	390.703	266.387	299.001	480.769	214.209	166.313	173.008	236.804	351.975	120.452	164.307	207.127	253.177	128.113	186.521	449.179	423.387	420.127	233.993	228.937	330.414	328.143	217.476	341.819	208.099	280.523	181.122	145.605	210.288	341.518
ANKRD40	91369	1329.89	1087.48	1183.42	1123.86	1501.74	1383.16	639.83	1296.8	842.697	1016.83	1430.03	1207.04	1507.11	1096.85	1226.51	1188.53	982.778	1428.06	1237.54	845.321	1246.8	1193.02	758.641	1134.83	748.545	1369.36	1202.98	884.083	1107.28	1256.52	1824.14	1371.12	1087.06	1114.93	1369.96	1387.51
ANKRD42	338699	266.739	350.486	309.226	129.173	236.601	310.137	272.824	123.23	226.592	245.192	124.327	217.65	196.6	120.097	199.843	178.013	217.885	302.895	154.936	119.967	245.847	207.392	237.903	83.0484	119.907	307.145	295.386	275.087	241.262	228.254	332.329	227.229	253.441	224.787	313.58	396.859
ANKRD43	134548	37.5612	17.1527	46.1894	177.136	16.5311	27.4914	13.9754	29.8899	4.3695	8.4135	31.2164	16.9707	18.9661	461.986	114.774	21.319	42.3523	19.5991	31.2805	27.7701	95.3963	48.2546	6.3364	4.8852	3459.84	13.7457	50.1895	82.4683	33.9806	6.1842	171.93	49.4186	123.463	50.6614	46.0905	10.4699
ANKRD44	91526	74.0338	36.0206	41.3273	80.1199	111.068	52.4055	15.7983	76.0357	241.573	9.0144	71.5823	66.1858	136.001	41.1622	85.0681	52.2314	6.1232	146.102	121.212	68.8698	148.078	20.5339	13.8249	4.3967	8.149	54.0348	49.1439	25.9516	33.0097	138.302	70.2398	19.8643	55.0533	141.101	116.049	50.3552
ANKRD45	339416	23.4077	5.1458	5.3482	1.0901	2.583	1.7182	11.5449	1.0488	0.6242	1.2019	0.5382	4.2427	1.8504	6.7797	3.6008	5.3297	34.188	5.3452	10.2639	3.7027	5.2207	0.5133	2.8802	0	3.4924	2.8439	5.2281	0	8.7379	7.8708	6.2901	3.876	1.6288	28.1452	1.6461	2.4928
ANKRD46	157567	302.346	201.83	211.29	894.095	283.027	227.663	209.023	247.509	317.622	286.659	147.718	331.502	385.479	629.191	493.404	820.982	283.71	450.989	455.474	500.509	408.334	259.42	260.945	210.064	530.338	210.821	390.898	385.15	177.689	493.473	644.214	237.2	1141.89	832.423	453.815	165.524
ANKRD49	54851	292.324	289.308	285.888	352.637	273.279	498.282	240.012	232.826	794.008	282.452	175.458	205.346	364.982	289.588	316.417	311.79	304.631	188.864	206.745	199.204	266.255	325.975	225.806	245.726	307.334	269.7	218.534	164.36	316.99	194.522	371.642	187.984	368.76	318.229	337.86	173.501
ANKRD50	57182	971.693	571.183	1322.47	287.233	424.125	445.876	207.2	579.968	109.863	249.399	177.072	625.795	352.492	591.283	583.774	288.872	296.977	1389.31	776.149	674.998	890.84	435.318	277.074	134.343	305.006	251.689	282.316	1535.76	478.641	1645	296.16	469.477	487.988	384.651	493.416	563.879
ANKRD52	283373	1017.42	1211.55	736.113	1030.66	2029.19	1564.43	970.986	799.161	1000.62	740.385	1029.6	1255.41	1750.43	1515.74	1560.93	1440.1	1249.65	2562.58	1868.52	3594.19	1321.78	1500.51	1581.8	1472.89	1360.88	1466.52	1117.24	923.875	1813.11	1533.12	1329.84	2132.75	1298.48	1868.47	1117.7	2257.51
ANKRD53	79998	28.8514	2.287	7.7793	4.9053	21.697	10.3093	80.2066	3.6707	10.6117	9.0144	3.7675	25.4561	39.32	33.8983	70.665	13.3243	6.6335	82.4053	26.393	8.8864	55.0546	16.4271	10.3687	36.1505	43.0733	3.7919	54.8948	6.3437	83.9806	74.7729	34.5957	110.465	9.447	11.2581	9.465	14.4584
ANKRD54	129138	393.032	643.797	555.731	667.666	534.677	506.014	758.317	634.505	564.295	749.399	619.483	579.126	305.308	843.583	405.086	519.116	618.446	479.287	631.476	634.268	413.859	556.981	960.254	667.318	651.921	274.914	689.06	558.247	487.864	391.293	409.907	663.76	613.731	832.723	506.173	1050.98
ANKRD55	79722	37.0169	8.0046	4.3758	3.8152	8.7821	3.4364	4.861	14.6827	192.26	1.8029	4.3057	0.4243	12.0273	0.9685	4.9511	1.5989	1.5308	3.5635	4.3988	18.5134	15.6621	7.1869	1.7281	9.7704	2.3283	1.422	24.0491	8.0738	4.3689	1.1244	12.5803	4.845	0.9773	1.5011	5.3498	0.9971
ANKRD56	345079	156.233	170.955	112.799	463.278	106.419	171.821	30.9889	184.583	0	64.9038	34.9839	121.765	55.9732	242.615	237.65	30.9125	79.602	163.92	256.11	176.618	342.193	124.23	49.5392	102.101	162.98	21.3295	150.569	195.502	200.971	133.242	203.905	55.2326	260.608	355.756	205.35	17.9484
ANKRD5	63926	167.665	299.028	125.927	112.277	187.008	233.677	123.956	136.864	50.5618	186.899	202.906	301.23	431.595	257.143	239.901	346.433	127.567	461.915	446.725	469.499	383.958	221.253	158.41	205.178	154.831	236.995	239.446	213.956	357.767	373.302	473.857	288.76	340.093	239.797	572.428	78.7735
ANKRD57	65124	520.414	714.122	543.576	743.971	1267.73	3524.05	794.167	2351.34	215.356	335.938	863.294	548.579	389.499	886.683	2426.02	3139.75	521.495	808.018	733.627	1262.24	776.459	912.218	211.405	2476.31	291.036	642.73	579.793	810.265	1470.87	1017.59	1388.02	1200.1	756.739	1229.38	1631.69	443.724
ANKRD58	347454	17.4197	12.0069	17.9895	75.2146	37.7115	11.1684	9.722	28.8411	441.323	10.8173	11.8407	17.8193	23.592	8.2324	6.7514	13.3243	6.6335	11.5813	26.8817	10.3675	16.1367	16.4271	15.553	14.6556	15.1339	23.2255	35.5509	11.534	7.767	16.8661	9.4352	12.1124	29.6441	33.399	13.5802	37.3925
ANKRD6	22881	361.372	298.462	352.585	249.026	975.705	320.301	405.955	399.276	188.383	350.18	397.142	360.284	1201.76	531.7	415.821	253.584	245.904	535.795	598.5	379.187	500.133	521.571	160.737	251.529	81.8044	214.907	493.515	572.116	268.961	606.093	517.285	327.011	283.525	600.469	164.132	72.0678
ANKRD7	56311	3.2662	0	0.9724	0.545	0	0	0	0.5244	1.8727	0	0.5382	0.8485	2.3129	1.937	0	0.533	0	3.5635	0	0.3703	1.4238	0	1.1521	1.4656	0	0.474	0	0.5767	1.4563	0.5622	2.0967	8.7209	1.6288	0	0.823	0
ANKRD9	122416	141.535	144.082	176.492	91.0206	78.0059	232.818	54.6863	56.1091	28.0899	161.058	99.5694	86.975	53.6602	81.3559	97.2207	265.954	189.82	103.341	105.572	64.7968	49.8339	105.749	121.544	128.481	260.768	127.977	77.3755	89.3887	95.1456	97.8232	40.3617	122.093	116.296	303.218	113.169	221.862
ANKS1A	23294	1261.3	970.841	869.333	627.333	1145.81	1130.58	619.171	1175.14	716.604	872.596	485.468	1233.35	923.789	827.603	1341.74	682.206	1554.79	874.388	1227.76	1545.87	1085.43	1046.2	836.405	969.712	856.81	524.707	814.011	857.555	810.194	793.267	1342.94	922.965	980.21	1854.21	621.399	641.157
ANKS1B	56899	3.2662	6.2893	20.9068	137.348	12.3983	9.4502	4.861	21.4997	9.3633	1.2019	0	16.1222	8.3266	0.4843	1.3503	1.0659	0	0.4454	17.5953	1.8513	7.5937	0.5133	0.576	13.19	6.9849	30.8093	0	1.7301	35.9223	0.5622	1.5725	20.8333	1.6288	21.0151	4.1152	0.4986
ANKS3	124401	538.378	648.37	537.742	523.232	604.417	663.23	1949.26	505.506	868.29	1783.65	874.058	751.379	826.645	448.426	484.303	447.698	586.809	487.305	592.864	560.585	527.29	898.871	1140.55	665.364	313.155	758.384	681.741	979.239	903.884	1004.09	662.561	699.128	478.215	370.016	558.436	364.452
ANKS4B	257629	62.6021	55.4603	21.393	1796.43	23.7634	838.488	230.29	178.815	1.8727	36.0577	533.907	15.6979	35.6193	93.9467	43.6593	236.64	8.6746	145.657	221.896	76.6454	232.558	72.8953	102.535	260.87	601.863	5.2139	72.1474	316.032	418.932	47.7872	202.857	40.2132	22.1516	911.155	172.839	15.4556
ANKS6	203286	472.51	315.609	509.542	307.399	626.63	261.168	305.636	269.533	491.261	368.389	619.483	762.834	874.754	549.153	693.147	887.401	1549.18	735.412	498.534	390.632	573.327	227.926	492.512	471.91	556.461	985.899	401.516	332.757	400.971	516.664	810.903	459.302	868.475	579.417	326.337	460.177
ANKZF1	55139	677.735	934.248	638.872	647.5	955.702	792.096	1173.33	723.125	2784.64	957.933	1085.04	1318.63	1047.76	1563.2	411.837	813.851	2046.69	906.013	1326.49	640.192	785.477	1619.61	877.88	658.036	769.499	1398.27	801.987	546.136	1238.84	1026.58	859.127	731.105	1029.73	659.724	1244.03	533.965
ANLN	54443	308.111	280.732	505.652	982.15	556.89	55.8419	12.7601	563.713	83.0212	546.274	658.773	280.865	81.8781	717.676	459.998	532.974	1416.51	193.319	616.324	389.521	483.151	119.097	179.724	191.5	372.526	629.458	289.113	400.807	361.651	237.249	346.481	602.713	281.782	88.1884	278.601	1929.45
ANO10	55129	545.999	331.618	648.596	412.59	329.071	445.017	590.612	425.275	262.172	736.178	388.052	687.739	363.594	512.833	617.531	369.884	324.531	355.457	478.495	466.537	447.556	303.388	226.382	602.833	328.289	474.464	488.302	460.784	736.893	615.049	493.775	414.244	551.511	953.56	495.473	1087.37
ANO1	55107	3136.64	975.986	6679.96	464.913	646.261	357.388	153.729	938.647	53.6829	27.6442	189.989	1977.94	2112.64	601.453	267.807	481.275	536.803	2158.57	1088.47	1189.3	602.278	450.205	566.82	263.801	2890.57	815.736	340.348	365.629	942.233	1249.78	887.957	463.178	3845.59	691.997	1086.83	757.821
ANO2	57101	37.5612	1.7153	7.7793	13.0808	8.2655	0	9.1144	1.0488	11.8602	0	0	2.9699	10.6395	0.4843	2.2505	3.7308	0.5103	2.2272	19.0616	3.3324	1.4238	0	0.576	2.9311	3.4924	0.948	7.3193	1.1534	4.8544	3.9354	2.6209	1.4535	2.6061	15.7613	4.5267	1.9943
ANO3	63982	5.988	4.0023	3.4034	2657.04	4.6494	3.4364	9.1144	18.3534	2.4969	18.0288	10.226	0.8485	12.4899	3.8741	2.2505	0	24.4929	5.3452	35.1906	14.0702	15.6621	0	2.8802	0	0	0	8.8877	20.1845	3.3981	2.2488	14.1528	2.4225	0.3258	2.2516	5.7613	34.4011
ANO4	121601	50.0817	20.0114	47.648	71.3994	10.3319	32.646	38.2804	41.9507	0	7.8125	14.5318	16.1222	2.7755	18.8862	3.1507	21.8519	12.2465	28.9532	2.4438	66.2779	14.7129	24.6407	31.682	1.4656	2.3283	0.948	8.3649	48.4429	19.9029	2.2488	9.9594	13.5659	7.8182	28.8958	11.9342	16.4527
ANO5	203859	42.4605	42.3099	200.316	3.2702	89.371	59.2784	17.6211	82.8526	54.3071	1.8029	226.588	30.5473	181.335	4.3584	23.405	180.678	17.3492	29.3987	6.3539	82.1994	28.0019	44.1478	168.203	0	73.3411	216.613	29.8	71.511	45.1456	25.8613	24.1122	96.8992	90.8869	316.728	12.7572	34.8997
ANO6	196527	2320.63	4833.62	1809.16	7919.34	2699.21	6738.83	2281.03	3495.02	564.295	2611.78	2496.23	2706.83	3193.71	3187.89	3264.99	4419.95	858.273	5523.83	2702.35	4404.7	5581.4	2397.33	1400.92	1765.02	4240.98	6164.71	3084.56	2365.63	3888.35	2848.68	3889.92	4305.23	3193.42	2981.89	3050.21	2008.23
ANO7	50636	22.319	39.4511	145.861	17.4411	55.7923	18.9003	59.5473	82.8526	4.9938	82.3317	32.2928	27.5774	15.2654	69.2494	135.479	61.292	38.7805	23.608	16.6178	43.6916	37.9687	33.3676	144.585	48.3635	84.9825	15.1677	18.8211	41.5225	44.1748	68.5886	27.2572	93.9922	26.3865	15.0108	30.4527	23.4326
ANO8	57719	282.526	418.525	576.638	109.007	256.748	635.739	68.6617	229.156	244.694	884.615	554.36	689.011	611.542	1027.6	461.798	251.564	174.002	442.316	503.91	102.934	766.018	509.754	141.129	176.356	344.587	635.146	651.418	916.378	455.34	467.19	218.582	184.593	1176.97	361.01	350.206	189.954
ANO9	338440	488.841	600.915	688.951	1993.73	393.646	1487.11	1211.61	374.41	3940.7	988.582	1040.9	647.433	792.876	779.177	932.148	472.748	752.647	796.882	1589.44	618.347	542.477	1371.15	639.401	925.745	11.6414	663.586	635.211	351.788	980.097	834.308	580.789	386.143	1314.44	518.247	1481.07	198.429
ANP32A	8125	3219.38	3817.61	1873.83	3397.74	2890.87	3777.49	3609.3	1936.55	3738.45	5685.1	2833.15	2458.63	3393.08	3291.04	2489.93	5405.95	4022.45	2564.37	2646.14	2391.19	2408.64	2805.44	3945.28	4445.04	2835.86	3340.21	3172.4	2805.07	2567.48	3161.26	3257.76	3232.56	2609.98	2354.07	3652.67	2343.76
ANP32B	10541	2970.06	3479.7	2981.89	2187.22	2830.43	2293.81	4738.27	1603.04	6405.74	2768.03	4338.54	2873.14	2791.26	2180.63	1761.67	3235.15	3236.64	3318.93	2290.32	2936.59	1790.7	1928.13	3880.76	1794.33	1413.27	5006.75	2704.48	2057.67	1966.02	1589.35	2090.42	1843.51	2359.48	1659.44	1704.94	4096.72
ANP32C	23520	1.6331	0	0	1.6351	0	0.8591	3.0381	1.0488	0.6242	4.2067	0.5382	0.8485	0.9252	0.4843	1.8004	1.5989	3.0616	3.5635	0.4888	1.1108	1.4238	1.0267	1.1521	2.9311	1.1641	0.474	2.614	0.5767	0.4854	0.5622	0.5242	4.3605	1.303	1.5011	3.7037	0.9971
ANP32D	23519	0.5444	0	0	0	0	0	0	0	0	0	0	0	0	0	0	0	0.5103	0	0	0	0.9492	0.5133	0	0.4885	0	0	0	0	0	0.5622	0	0	0	0.3753	0	0.4986
ANP32E	81611	1046.82	995.998	1041.45	3628.83	1299.24	1909.79	606.41	1159.41	1693.51	1449.52	1011.3	2678.83	854.863	1902.66	960.054	1774.27	2909.04	1200	1618.77	1126.72	1307.07	1028.23	433.18	466.536	1629.8	879.725	1363.48	867.935	1356.8	1457.23	1203.51	1161.34	3705.51	428.183	1454.73	1760.44
ANPEP	290	1517.69	20670.7	963.656	76364.6	3445.69	36721.6	32754.1	3387	249.064	32941.7	18990.9	13786.2	21564.5	11456.2	12942.5	9265.22	281.669	5829.84	11087.5	4547.26	24597.5	939.425	17165.3	27851	26252.6	15359.6	25876.4	36536.3	14194.2	10442.9	21998.7	18720.9	5314.77	10971.4	5590.53	11891.3
ANTXR1	84168	5929.23	2341.34	6504.44	787.573	1691.33	396.048	580.283	1466.7	352.06	78.726	305.167	2879.51	1292.01	841.162	1413.3	1335.1	332.695	5972.83	2555.23	2314.17	2007.12	623.717	974.654	517.342	292.2	3577.68	900.797	885.813	2618.45	3873.01	1445.16	1493.7	3068.33	1241.77	2176.13	2015.7
ANTXR2	118429	2372.35	590.623	6402.33	689.467	753.196	192.44	190.187	936.55	1005.62	256.611	183.531	545.185	745.23	153.995	333.971	441.835	170.94	1009.8	671.554	1001.94	788.799	272.587	338.134	152.418	273.574	2070.86	650.895	521.915	565.048	864.667	552.483	453.973	603.632	788.817	876.132	7304
ANTXRL	195977	0	0	0	4.9053	0	0	0	0	0	0	0	0	0.4626	0	0	0	0	0	0	0	0	0	0	0	0	0	0	1.1534	0	0	0.5242	0.4845	0	3.7527	0	0.4986
ANUBL1	93550	140.991	44.5969	75.8478	65.404	113.651	55.8419	34.027	95.9622	159.176	49.2788	116.792	293.594	127.674	78.9346	110.273	110.859	115.831	166.592	103.128	169.212	95.3963	74.4353	33.9862	79.6287	110.594	46.451	108.744	37.4856	102.913	194.522	157.778	108.043	73.2959	262.689	102.058	51.8509
ANXA10	11199	37.0169	120.64	8500.79	0	4.6494	2.5773	1.8229	243.839	0	1.2019	130.248	0	19.8913	0	1.8004	35.7092	2.5513	1.3363	1.955	119.596	65.496	22.0739	104.839	6.8393	332.945	0.474	163.639	132.065	0.4854	2.811	1.0484	36.3372	0.3258	0.3753	51.0288	6.9799
ANXA11	311	7685.9	7898.8	6219.03	8040.33	5718.71	9960.48	8689.05	9433.14	5057.43	5881.01	9809.47	10735.3	6006.24	7275.06	7571.96	10402	4033.17	8577.28	3964.81	5836.53	8549.12	7009.24	9785.14	10185.6	4700.81	7393.77	7171.35	10842.6	5433.98	6514.8	5796.36	5267.44	21710.9	3089.97	6913.17	6031.66
ANXA1	301	7989.11	607.204	8484.26	566.29	889.578	255.155	622.209	588.359	899.501	108.173	234.661	383.114	875.679	213.559	783.166	345.367	1492.54	972.383	972.63	610.571	1675.84	207.392	511.521	295.555	123.399	2425.88	1849.17	463.668	448.544	821.939	488.009	564.923	616.337	678.863	1654.73	16185.5
ANXA13	312	254.219	3795.88	38.8963	993.051	4194.76	9664.09	5070.03	304.143	0	17632.2	11682.5	878.235	3674.34	11553	3750.2	738.702	12.7567	3512.25	903.715	463.575	5598.48	2213.55	15143.4	17636.5	303.842	1223.37	4041.82	21809.7	9409.71	2775.59	2831.08	2257.75	6527.89	4173	809.876	647.638
ANXA2	302	24179.6	15223	31938.7	21925.6	19212.7	26801.5	15605.7	20289.5	3633.58	16375.6	18537.7	13669.1	10218.6	24828.1	12576.1	29955.8	24812.3	24449	11083.6	13865.4	15054.1	16614.5	15001.2	38419.2	4777.65	36298.1	13518.8	12155.7	20132.5	19026.6	37231.8	29953	29848	6772.87	41942	33662.7
ANXA2P1	303	139.358	82.9045	128.358	103.556	78.5225	149.484	12.7601	100.157	8.1149	67.3077	109.257	66.1858	41.1703	102.663	70.2149	144.436	100.523	144.766	76.7351	52.9483	65.0214	65.1951	52.9954	164.143	40.7451	246.949	79.9895	55.94	68.932	98.9476	183.462	128.876	193.827	49.1603	247.325	125.639
ANXA2P2	304	7121.94	4651.23	12119.6	7668.07	7989.15	10058.4	2442.05	8080.23	935.081	3364.78	5625.4	4933.81	4039.32	8862.47	4721.05	11516.5	7912.23	8446.33	3561.58	5346.29	5518.27	5017.45	4483.87	12898.4	1628.64	12369.2	3929.94	3866.21	7118.93	6736.87	13296.3	10512.6	9721.96	2324.05	12965	10932.6
ANXA2P3	305	2.1775	1.7153	4.3758	5.9954	5.6826	15.4639	2.4305	8.3901	1.8727	2.4038	2.6911	8.9096	3.2381	5.3269	4.501	5.8627	4.5924	4.4543	1.4663	3.3324	3.3223	5.1335	4.0323	12.213	3.4924	6.1619	1.0456	2.8835	5.8252	2.2488	4.7176	13.0814	4.5606	1.5011	6.5844	4.4871
ANXA3	306	2026.67	2346.48	2587.09	789.753	1736.28	2707.04	1272.37	1556.37	11.236	1673.08	750.807	1133.64	567.133	1093.95	2584	1387.33	1678.79	1680.18	832.356	1133.76	2958.23	1456.88	1178.57	1362.97	1.1641	1503.5	617.436	2205.31	1432.52	998.471	977.591	2031.01	3297.01	601.933	1919.34	1657.73
ANXA4	307	5708.76	30502.6	15080.1	60221.8	23852.3	29134.9	27020.5	22647.6	383.271	23604	24822.9	9334.32	29894.8	16688.6	41482.2	17630.2	3664.75	18212.5	28160.8	11268.4	25422.4	19674	30206.2	27613.6	9932.48	37001.5	16352.9	23997.7	30369.4	14531.2	30746.7	18453	12815.4	4358.01	22356.8	10282.9
ANXA5	308	8713.66	11364.2	16069	9041.01	9274.44	7007.73	5333.74	5545.36	2447.57	5042.67	4543.06	12868.9	9032.03	13532.7	9409.25	8167.29	4258.71	15376.8	6048.88	7574.19	10921.7	9466.12	12390.6	7150.95	2258.44	10637.3	5171.61	9453.29	7772.33	16120	8637.92	12194.8	15103.5	5325.45	7258.44	12223.9
ANXA6	309	6206.31	1565.47	2698.43	1135.85	7062.38	610.825	1621.75	2038.8	11686	321.514	748.654	1408.15	2756.56	750.605	2214.92	1045.69	7944.38	1764.81	2105.08	2114.97	2246.8	530.801	1326.04	2705.91	591.385	852.234	2894.78	887.543	895.631	1261.02	659.94	5091.57	1939.25	931.795	2395.88	5758.94
ANXA7	310	3329.34	2415.09	2533.61	2833.08	2656.85	2676.98	1336.17	3306.24	2323.97	1061.9	4296.56	5092.91	4599.98	2778.69	2669.97	3132.82	2236.51	3728.29	1852.88	3339.44	2212.62	2337.27	2225.23	3527.6	3693.83	3285.22	2620.31	2201.85	2415.05	2464.13	2527.06	2073.16	5454.84	6607.37	2924.69	3506.42
ANXA8	653145	1998.73	93.1961	858.704	3.2702	4967.55	9.4502	12.7601	31.9874	1.2484	20.4327	2638.86	1464.96	3330.67	5.3269	5.4011	10.1265	11.2259	204.009	22.9717	172.915	2458.97	38.501	1284.18	1562.77	3.4924	3248.26	139.135	131.488	75.7282	748.853	1046.26	20.8333	1948.07	494.23	37.0535	487.598
ANXA8L1	728113	1.2738	0	0	0	2.614	0	0	0	0	0	1.6093	3.0038	19.8589	0	0	0	0	0	0	0	5.2017	0	0.9562	0	0	0	0	0	0	0	0	0	0	0	0	0
ANXA8L2	244	784.431	1448.83	337.912	48.508	2588.66	29.2096	113.018	631.883	0.6242	456.13	1574.27	342.384	2350.87	15.9806	212.895	74.0834	30.6162	265.479	16.129	296.954	1343.62	153.491	1116.36	1148.51	3.4924	2468.54	246.242	1295.85	319.903	868.04	649.456	122.093	1937.94	1060.51	164.609	231.833
ANXA9	8416	179.641	8679.25	314.088	174.956	2550.43	6372.85	2831.54	3142.63	8.1149	4397.84	1322.39	3406.87	1483.06	2705.08	2034.43	1951.22	35.2086	2753.23	2219.94	2195.69	2133.84	4518.99	3207.37	5456.77	538.999	3851.64	2033.72	6399.08	2466.5	2884.1	702.922	863.372	1866.6	137.349	1489.71	282.687
AOAH	313	345.672	72.6129	57.8583	42.5126	203.022	84.1924	136.108	141.059	367.665	6.0096	36.0603	10.1824	389.499	13.0751	85.0681	85.8088	2.5513	55.2339	134.897	94.4182	209.302	18.9938	57.0276	34.1964	3.4924	108.07	164.161	43.8293	4.8544	31.4833	120.561	48.4496	2.9318	15.7613	171.193	285.18
AOC2	314	23.9521	30.303	25.2826	16.351	36.6783	19.7595	7.8991	23.5973	32.4594	67.3077	155.544	26.7289	18.5035	24.2131	26.1055	18.6541	37.7599	35.1893	104.106	31.843	48.4101	30.8008	15.553	37.1275	51.2224	37.4452	83.1264	28.8351	18.932	32.6077	54.5145	34.3992	29.3183	14.6355	15.6379	15.4556
AOC3	8639	1527.49	356.775	1036.1	185.856	406.561	173.54	305.028	393.812	563.046	130.409	277.718	380.993	402.452	167.554	694.948	274.481	178.594	872.16	967.253	552.439	773.612	123.717	236.751	121.641	317.811	292.926	659.26	472.318	316.019	645.408	362.731	360.465	636.534	300.591	723.868	230.836
AOX1	316	129.015	59.4626	102.103	527.047	717.551	18.9003	2175.91	5586.26	83.6454	170.072	2674.92	1075.94	50.4221	28.0872	233.6	20.786	230.642	357.684	983.871	4019.62	2487.42	584.702	9.2166	10.7474	3575.09	309.515	5869.04	2170.13	332.524	101.759	291.443	795.543	143.334	23672.8	1790.54	2917.61
AOX2P	344454	0	0.5718	0	0	0	0.8591	0	0.5244	0	0	0	0	0	0	1.3503	0	0	0.4454	0	0	0.9492	0	0	0	1.1641	0	0.5228	1.1534	0	0	0.5242	0	0	0	0.4115	0
AP1AR	55435	455.634	371.069	773.064	731.435	444.272	628.866	133.678	331.935	270.911	320.312	279.333	407.722	300.682	580.145	686.396	200.931	418.931	505.568	694.037	231.787	441.861	305.442	214.862	135.809	173.458	311.885	303.228	584.775	400	658.339	383.174	231.105	445.965	943.428	341.975	436.246
AP1B1	162	3317.37	2301.89	3269.72	3536.72	2931.68	2670.1	1350.14	4492.4	6844.57	2024.04	4395.05	1780.23	1786.05	2348.18	2215.37	2879.66	2447.25	2027.17	2881.23	3397.2	1966.78	1657.08	3866.94	4743.53	2642.61	2195.52	2389.75	1935.41	1984.95	2219.57	1874.98	3326.07	1887.12	3499.01	2610.7	4047.86
AP1G1	164	1844.86	2297.88	2046.92	4024.53	2013.69	2671.82	1430.96	3196.64	1724.72	2436.9	1761.57	2087.4	2880.07	2512.35	2813.55	2623.3	2254.37	1095.32	2249.76	2890.31	3042.24	978.953	1546.08	1701.51	3249.13	2948.22	2247.55	2531.14	2922.82	1388.64	2205.74	1667.64	2097.56	3198.05	2247.33	1817.77
AP1G2	8906	1759.67	1740.38	2250.52	2365.26	1265.59	2778.74	1934.09	1972.93	4959.89	3859.38	3589.6	1952.71	2653.59	1853.67	889.564	2790.54	2304.44	1644.04	2278.66	1691.39	2049.81	3170.41	1834.9	1824.86	354.494	2737.77	2171.43	3346.47	2758.93	2304.78	1020.88	1087.5	1782.89	10327	989.572	769.553
AP1M1	8907	1206.86	1646.66	1075	1024.12	1701.15	1454.47	1799.18	1248.56	2087.39	1655.65	1772.87	984.726	1749.97	1116.22	1058.62	1698.05	359.229	1049	993.157	1578.82	1429.05	1409.14	2882.49	3263.8	4204.89	2139.12	1483.2	2057.09	1370.39	1056.38	1816.8	3134.21	1077.61	958.814	1328.81	2440.48
AP1M2	10053	1276.54	2232.7	2455.82	1753.37	1074	2308.42	2479.11	1101.21	0.6242	972.356	2708.83	1902.42	1.3878	1911.38	800.72	1102.72	1770.63	501.559	1197.46	1339.26	1596.11	2052.36	732.719	637.518	32.596	449.342	159.456	1602.08	960.194	600.994	19.3946	32.4612	2094.63	2420.49	2018.93	582.824
AP1S1	1174	773	1510.01	2508.81	2172.5	761.462	1236.25	1741.46	1431.04	518.102	1350.36	2146.39	819.262	675.841	996.126	934.849	1117.65	1880.85	726.503	1331.87	1193	644.518	1378.85	1494.24	1964.83	1165.31	1032.82	931.12	1009.23	851.942	800.576	830.298	1132.27	1398.49	1546.49	974.486	1610.87
AP1S2	8905	437.67	207.547	279.567	2643.96	235.051	150.344	125.778	294.704	653.558	72.7163	146.394	81.4595	245.172	151.574	155.733	100.732	108.177	184.855	214.565	179.58	253.441	165.811	179.724	283.341	33.7602	350.279	267.677	139.562	259.223	211.388	223.3	145.349	83.7202	94.9432	239.095	636.171
AP1S3	130340	545.455	263.007	516.349	731.435	191.657	331.615	50.4329	530.677	295.256	173.678	301.938	219.771	82.8033	122.518	145.831	109.793	420.972	93.9866	173.509	106.637	182.724	168.891	92.1659	331.705	189.756	422.325	145.863	325.836	272.33	309.211	107.981	129.361	147.243	221.784	399.589	297.644
AP2A1	160	2769.28	1837.36	2860.75	2191.81	2428.57	1409.91	2451.49	2579.29	2172.9	1868.88	2549.03	1661.16	1429.97	1842.23	1889.06	2729.66	1795.4	1850.13	2328.53	3579.59	2680.78	1543.4	2380.98	3005.68	3415.05	1704.24	2238.43	1471.39	1917.2	1920.05	2748.04	3330.95	1744.62	2049.86	2578.02	2724.83
AP2A2	161	1964.62	4194.97	1960.37	2305.49	2137.67	2088.49	3880.3	2332.46	1857.05	2583.53	1980.09	2501.91	3156.7	1783.05	2178.46	2682.99	2385	2738.98	3150.05	2532.26	2402.47	3526.18	4570.85	2997.07	1697.32	2433.46	1651.03	1351.21	2174.27	2553.52	2637.14	2440.41	2271.52	1875.22	2290.53	2416.05
AP2B1	163	4494.28	5146.37	6588.06	3286.55	14847.5	4713.92	5093.73	7300.47	3273.41	6195.91	7208.29	5081.46	5360.47	5626.63	6443.12	5957.05	5228.22	5479.73	4982.89	6310.84	5105.36	4061.09	4540.9	6693.21	4655.41	7702.81	3800.29	3687.43	5249.51	4792.21	5898.05	7580.43	6414.53	4865.37	6655.97	5806.31
AP2M1	1173	9650.52	5648.94	5941.41	8650.77	10451.2	6848.8	9245.63	10687.5	6272.16	7607.57	4427.34	5293.59	7195.56	4655.69	7463.49	9958.08	5611.94	7920.71	4436.46	11127.6	4326.06	4147.33	18278.2	21935.5	8140.86	8045.5	4736.64	5952.71	3706.31	7365.41	4060.8	14404.1	4624.81	5561.5	7207.82	12540.9
AP2S1	1175	1428.42	1251	1600.58	1464.5	930.389	834.192	3150.54	1237.55	1818.98	2637.02	1896.12	751.379	464.438	1453.75	935.749	880.473	1248.63	916.258	1268.33	1538.46	1325.58	1764.37	2057.03	2028.82	2027.94	953.668	1552.74	1449.25	1200	1049.07	970.253	1047.48	849.255	983.957	694.65	1889.57
AP3B1	8546	1059.88	1268.15	1175.15	741.245	919.024	988.832	561.446	1261.14	736.579	948.317	947.255	1174.37	1399.79	977.24	1314.28	1989.59	699.069	2191.98	1001.47	1861.33	1292.83	815.195	1055.3	1274.06	1582.07	1470.32	1231.21	602.076	1249.03	1343.1	893.199	1602.23	1376.66	1413.64	1451.44	941.792
AP3B2	8120	80.5661	0.5718	38.8963	20.1662	28.9294	11.1684	18.2288	0.5244	41.1985	34.8558	138.859	12.728	123.049	249.395	569.821	24.5168	9.1848	91.7595	43.9883	15.181	46.5116	2.5667	1.1521	392.77	34.9243	12.7977	24.0491	4.6136	166.505	41.0407	30.4023	47.9651	0.3258	797.448	137.449	1.4957
AP3D1	8943	2903.65	4633.5	3621.73	5196.35	5076.59	4630.58	3972.05	4621.39	2981.27	3927.88	6333.69	3571.06	4810.92	3659.56	4559.02	4880.97	2872.31	2987.97	4627.08	6299.36	4017.56	3223.31	5633.64	7052.27	6575.09	4973.58	3328.72	4726.64	3825.73	3636.89	4523.13	6514.05	3510.71	3574.44	2441.56	5157.67
AP3M1	26985	1107.24	1519.73	686.034	1162.01	1103.45	996.564	690.263	1273.2	943.196	563.101	2498.39	2274.5	1709.73	1076.51	1310.68	1700.72	1426.2	1745.21	1172.04	1983.52	1218.79	1172.48	1154.95	1395.21	1431.9	1107.71	943.668	1092.27	1045.15	1091.23	1126.98	1059.59	2255.23	1838.45	1491.36	1414.93
AP3M2	10947	552.531	672.956	655.403	222.919	594.602	551.546	244.266	684.845	438.202	362.38	238.428	489.605	590.263	794.673	656.689	1031.3	415.869	1094.43	404.692	388.411	336.972	745.38	498.272	363.947	389.988	476.36	415.109	382.93	555.34	911.33	254.75	504.845	2612.26	810.207	871.605	412.813
AP3S1	1176	917.801	911.95	1833.48	624.608	915.924	550.687	442.959	1262.19	862.672	870.192	831.001	458.21	425.118	531.719	1013.62	451.429	560.786	840.98	655.914	917.153	730.422	509.24	563.94	1084.51	1103.61	1321.48	583.453	1285.47	700	654.965	690.866	969.477	654.451	1149.83	1058.44	1631.81
AP3S2	10239	1681.83	2084.36	1048.16	1588.06	2232.56	1538.69	1601.44	1529.08	1096.26	1516	1839.61	849.347	1945.38	1782	3165.76	2624.5	1360.31	1156.93	971.755	1190.67	1088.65	1673.41	1819.52	1655.08	2103.92	2487.28	1574.32	1320.36	1415.22	1055.75	1955.05	1590.5	975.304	1698.14	1189.6	992.347
AP4B1	10717	444.393	224.037	627.704	478.85	324.861	265.962	467.872	142.449	1290.09	366.07	305.022	345.605	302.755	395.806	341.987	200.212	298.604	417.831	481.486	260.346	352.074	338.706	252.304	296.849	186.356	137.362	464.149	203.968	388.257	414.303	310.187	254.748	150.087	403.498	637.613	484.417
AP4E1	23431	229.178	128.073	200.316	194.032	291.877	172.68	70.4846	129.523	361.423	204.327	286.868	237.59	326.125	276.513	255.654	368.285	271.974	309.131	263.93	234.379	355.007	177.105	108.295	255.496	393.481	251.689	247.288	183.968	279.126	263.111	382.125	245.155	254.744	296.088	480.247	269.724
AP4M1	9179	350.98	580.869	1330.76	315.683	403.255	509.648	899.006	272.197	257.828	933.924	321.954	360.628	317.59	501.462	509.18	266.903	595.122	663.011	598.372	368.338	532.791	521.047	595.23	355.208	152.643	383.638	463.966	418.789	353.048	579.821	608.838	521.047	633.198	267.905	531.091	373.481
AP4S1	11154	118.672	37.1641	82.6547	69.7643	43.9106	74.7423	68.6617	66.5967	120.474	91.3462	72.6588	48.3666	61.9868	18.8862	22.5048	139.639	65.8247	77.5056	52.7859	64.7968	45.5624	39.0144	24.7696	74.255	24.447	58.7747	54.8948	91.6955	69.4175	43.2896	27.2572	51.8411	52.4473	53.6636	38.6831	48.361
APAF1	317	402.286	387.65	465.297	397.874	476.301	267.182	170.135	310.96	479.401	768.029	268.03	510.819	317.798	604.358	221.447	563.353	331.165	509.577	546.432	773.119	707.167	272.074	157.258	337.079	372.526	345.065	289.635	397.924	580.582	538.027	465.994	446.705	215.327	510.742	516.049	380.905
APBA1	320	231.356	136.649	124.954	84.4802	146.197	54.1237	40.7109	89.1453	83.0212	22.8365	43.0571	40.3055	728.576	148.668	166.085	107.661	48.4756	265.033	207.234	221.79	113.431	173.511	86.4055	234.978	846.333	94.324	77.3755	60.5536	84.466	77.0217	988.075	141.473	83.0687	68.2991	92.5926	147.077
APBA2	321	223.734	162.379	260.605	31.6119	372.466	508.591	568.738	175.669	665.418	829.327	4.3057	292.745	636.984	30.0242	21.6046	441.302	16.3286	53.8976	310.85	149.588	60.7499	243.327	304.724	224.231	23.2829	55.4568	68.4878	23.6448	96.6019	526.221	20.4429	826.066	316.638	66.4227	80.6584	55.8395
APBA3	9546	349.483	404.803	365.625	310.124	589.952	408.935	547.471	290.509	950.687	575.12	314.855	334.323	548.63	556.901	584.674	321.383	185.738	393.764	571.847	656.855	630.28	455.339	586.982	658.525	359.721	407.631	596.523	382.93	486.408	598.745	512.646	591.085	243.017	268.318	214.403	366.447
APBB1	322	875.34	304.174	629.148	452.378	680.873	823.024	905.362	114.316	1629.84	140.024	538.213	700.467	1088.93	779.177	835.828	151.364	93.3793	688.641	835.288	137.369	977.693	871.15	200.461	229.604	359.721	1249.91	559.404	208.189	734.952	575.133	547.241	473.353	1019.3	911.155	886.42	937.804
APBB1IP	54518	312.466	5617.5	246.505	437.662	3196.18	1030.93	971.593	314.63	2521.22	1628	168.999	43.6996	4871.05	281.84	4579.72	90.6055	23.4724	2246.77	337.243	1078.22	691.979	178.645	1051.84	4745.97	918.51	176.324	1642.66	752.019	2568.93	170.347	517.363	2737.4	19.8713	24.0173	1749.38	945.781
APBB2	323	1302.67	592.91	1267.53	387.519	1389.13	202.749	317.788	718.406	426.342	396.635	187.836	2148.49	991.327	588.378	766.963	426.912	533.231	787.082	964.321	853.096	1461.32	432.752	377.88	329.751	590.221	661.69	871.52	638.408	699.515	1431.37	525.226	809.593	2310.94	616.568	503.292	870.996
APBB3	10307	221.557	197.827	414.732	160.24	456.671	351.375	233.328	229.156	1198.5	427.885	194.833	275.774	333.526	499.758	311.466	268.619	344.432	491.314	326.979	297.325	321.31	324.949	179.724	272.106	1811.41	208.082	375.376	294.694	349.515	291.783	486.961	335.271	261.259	307.721	286.008	189.455
APC2	10297	8.797	24.717	9.2816	13.6912	3.642	5.1546	14.6316	28.4426	5.0187	9.0925	5.9849	6.4149	12.587	9.724	34.4188	10.7181	4.1077	12.5301	11.3734	2.2401	30.5411	10.8368	31.2097	1.4704	21.0594	55.5184	4.7523	11.6205	6.3301	6.8139	10.5569	12.1996	21.3666	13.3146	20.2798	3.0163
APC	324	522.047	664.951	769.175	454.558	706.186	637.457	222.391	953.33	425.094	515.625	467.169	858.294	723.951	506.053	1086.08	753.625	330.144	1389.31	789.834	1154.49	1396.77	486.14	277.074	350.757	894.063	897.737	592.864	685.698	802.427	1157.57	771.065	514.535	712.762	1166.71	828.807	333.541
APCDD1	147495	659.227	1306.46	1255.38	109.007	602.351	5423.54	3111.65	667.541	122.971	2700.12	315.931	815.868	803.978	2188.86	1671.21	3689.78	8286.26	195.546	4417.4	567.62	4344.09	4232.55	571.429	394.724	33.7602	2693.68	1397.99	1773.93	1957.77	1730.46	1062.51	230.136	986.399	51.7872	1687.24	547.426
APCDD1L	164284	136.091	1.1435	1277.74	0.545	2.0664	0	0	1.5732	0	0	0.5382	10.6067	3.7007	7.7482	0.9002	1.0659	26.534	8.4633	1.4663	9.627	1.8984	1.0267	9.2166	1.4656	0	24.1735	0	1.7301	12.6214	44.414	0	5.3295	40.7199	215.03	0.823	13463.3
APCS	325	348.394	6685.53	2938.62	17.4411	8007.23	5373.71	8230.9	5798.11	0	3722.36	6420.34	2097.16	4110.1	1837.77	8631.48	4484.44	209.721	2003.12	6809.87	3564.94	2256.29	13809.5	7944.7	16960.4	8682.19	8981.16	10870.7	7648.21	13831.6	598.745	9871.31	11710.3	2560.79	84.0604	5615.23	3699.36
APEH	327	1500.82	1932.53	2287.59	2072.22	1985.28	1603.95	2305.94	2213.95	2230.34	1154.45	2925.73	1990.67	1979.41	1343.34	1476.76	1467.81	1295.57	1272.61	1018.08	1880.96	1323.21	1770.53	3461.98	3263.31	1551.8	1893.12	1748.79	1734.72	1586.89	1335.23	1178.35	2186.53	2681.98	3079.84	1544.86	1889.07
APEX1	328	3508.44	2575.19	2852.07	2667.39	2215.68	3516.32	2607.32	3643.94	3330.84	5270.43	4885.36	3295.71	3940.79	2142.37	1537.98	3695.64	4961.86	4427.17	3050.83	3129.5	3701.95	5091.89	2985.6	3291.65	1461	4160.68	3853.09	5086.51	3104.37	3216.36	2087.8	1937.98	2627.25	2180.32	1920.16	2541.69
APEX2	27301	808.928	645.512	779.871	942.908	781.093	565.292	844.6	501.835	956.305	625.601	742.734	498.091	514.861	543.341	585.574	562.287	811.328	625.835	1112.41	733.13	584.243	1052.87	729.263	1042.5	733.411	481.574	663.966	778.547	638.835	739.296	1122.79	905.523	477.563	566.657	848.971	758.32
APH1A	51107	4882.96	8260.15	5713.38	5310.81	5082.27	13878.9	7884.55	5765.6	4011.86	5388.82	5522.6	12369.1	5100.5	9417.92	4078.32	7445.11	5862.48	5309.13	7912.02	5672.5	5616.52	7859.34	5863.48	4380.56	8367.87	4605.28	5669.85	4267.01	4450.49	7020.78	7520.38	7004.36	13257.4	2821.28	5811.11	3956.13
APH1B	83464	329.341	161.235	341.315	189.127	348.702	271.478	240.012	260.619	469.413	595.553	434.338	650.403	340.465	985.472	542.365	204.129	107.667	693.987	362.17	494.307	935.928	680.698	137.673	1078.65	54.7148	579.216	462.162	405.998	443.689	526.221	767.92	140.988	656.08	429.309	1030.04	398.853
API5	8539	2076.76	2268.72	2181.6	2480.45	1943.95	2222.51	1787.03	2494.49	1831.46	864.784	2134.55	1783.62	2614.09	1255.21	1822.89	2318.97	3180.51	1652.56	1296.68	1618.81	1185.1	1729.47	1865.21	1705.91	2054.71	1935.77	1344.66	1158.59	1454.37	1829.41	1942.6	1439.92	1818.71	2001.31	1886.83	2142.34
APIP	51074	290.305	518.971	454.056	548.663	248.968	442.749	239.405	232.821	373.758	303.323	609.193	294.412	485.398	278.794	481.733	501.656	381.482	254.735	371.09	218.262	141.111	425.051	626.699	408.916	404.168	437.815	267.092	379.406	327.315	320.826	163.433	268.803	257.725	312.483	311.979	355.099
APITD1	378708	153.195	231.607	206.539	1507.07	147.746	127.148	404.484	164.132	147.603	280.631	220.856	86.0925	262.639	163.264	121.283	179.079	352.861	271.76	196.989	110.058	93.963	131.792	289.343	111.871	82.6542	161.01	235.948	324.815	202.772	98.3854	302.377	230.625	101.878	179.754	133.292	316.091
APLF	200558	74.0338	47.4557	73.4168	16.896	42.3608	9.4502	26.7355	69.2187	60.5493	64.9038	45.2099	92.9147	97.6061	99.7579	210.195	42.1049	37.7599	171.047	142.229	68.8698	109.16	135.524	59.9078	74.7435	9.3132	131.295	104.039	73.8178	81.068	134.929	35.6441	68.7984	142.031	105.076	55.9671	98.2176
APLN	8862	76.7556	50.8862	124.954	210.383	36.6783	17.1821	27.9508	45.6214	4.3695	6.6106	3.7675	273.653	38.3948	11.6223	25.2054	277.146	27.0443	243.653	1096.29	86.6426	19.4589	55.4415	134.217	136.786	95.4598	28.9134	79.4667	24.7982	180.583	401.412	22.5396	66.376	76.8792	336.617	79.8354	73.2893
APLNR	187	768.1	583.762	449.739	833.901	340.437	134.021	1142.34	976.927	952.559	115.986	215.285	373.356	636.521	205.811	1059.08	100.732	304.631	680.624	1662.27	1245.21	921.215	132.957	755.76	254.519	392.317	125.133	1341	1030.57	370.388	770.779	545.669	575.581	127.698	694.624	431.276	227.346
APLP1	333	121.938	312.75	449.252	125.903	20.1472	415.808	40.1033	915.574	124.22	2576.92	16663.6	70.4285	68.0005	312.833	254.754	667.283	9.6951	110.022	34.2131	26.6593	106.787	29.7741	822.005	619.932	726.426	1033.3	253.562	4707.61	450.485	589.75	15.7253	82.3643	501.67	1327.7	337.037	386.389
APLP2	334	16291.2	10052.6	24372.4	19669.2	7430.19	11512.9	4649.55	18248	2904.49	17504.8	8639.4	17348.3	6762.11	10453.8	6425.57	10792.2	6771.27	11386.2	6673.02	12295.8	14858.1	10379.9	9649.77	9716.66	16089.6	19413.7	8933.21	7999.42	12919.4	13174.1	8318.18	7924.9	25520	28838	14510.7	25111.8
APOA1	335	5.988	369.926	1.4586	802.834	339.92	2.5773	77.1685	52295.8	15.6055	8060.1	33264.8	48.7908	0	100.242	62.5633	278.745	1391.5	13.363	2.9326	18138.3	21010.4	17.9671	5.7604	24.426	42614.7	9.4798	111993	26000	6.3107	49.4738	266.806	6539.24	4.8864	97.5701	8971.19	174.997
APOA1BP	128240	1538.38	3215.55	1396.38	2122.91	1749.19	3621.13	5857.51	1712.11	1826.47	2671.88	2146.93	4347.48	2668.67	2622.76	1639.25	4014.36	3120.3	1758.57	2871.46	1650.65	1731.85	4632.96	6153.8	3724.47	2896.39	1383.58	2978.43	3775.09	2059.22	3040.95	1842.48	4262.6	3828.32	1445.54	2336.21	1601.4
APOA2	336	0	153.802	0	2.7252	154.979	36.9416	30.3813	18516	1.8727	6206.13	9170.08	11.031	205.852	1444.07	121.976	110.859	831.229	20.0445	122.678	15179.5	7745.61	438.398	262.097	13993.6	77587.9	1.422	51363.2	10419.3	4267.96	22.4881	57.6595	1415.21	0.6515	76.1798	2857.61	142.091
APOA4	337	1.0887	2.287	0.9724	20.7113	5.6826	0	0.6076	285.789	0.6242	4.2067	344.995	0	0	0.4843	0	1.0659	10.2054	0	28.348	82.9399	70.7167	0	0	31.7538	18.6263	0	388.446	156.863	0	0	1.0484	71.7054	0	27.0194	23.4568	21.9369
APOA5	116519	1.0887	26.3007	0	0.545	21.697	0	1.2153	1664.92	1.8727	127.404	933.262	0.8485	0	3.3898	1.3503	4.2638	40.8215	0.4454	2.4438	426.178	910.299	0	0.576	1.9541	16151.3	0	1986.67	455.594	0	2.2488	0	218.023	0	305.094	524.691	3.49
APOB	338	129.015	1500.86	9.7241	2232.46	11326.9	5432.99	3325.54	25760.4	1.8727	12541.5	18840.2	1408.99	4370.53	6013.56	6024.53	4745.07	554.663	11722	5069.4	38046.8	16819.2	41.0678	14746	20201.8	51166.5	1141.84	28506.6	16801.6	23222.3	1474.66	6502.42	3527.62	395.798	10011.8	8923.05	1663.22
APOB48R	55911	350.027	187.536	381.184	179.861	612.682	183.849	323.865	184.059	1225.97	60.0962	220.667	51.7607	390.887	83.7772	126.027	154.562	128.588	282.405	273.705	319.911	273.375	404.517	317.396	306.79	54.7148	480.152	342.439	129.758	112.136	263.111	272.572	165.698	33.879	30.7721	346.091	248.785
APOBEC1	339	28.307	4.574	13.1275	50.6881	8.2655	11.1684	1.2153	0	0	0.601	0	0	0	0	0	0	9.1848	0	0.4888	0	0	0	0	0	0	0	0	0	0	0	0	0.969	0	0	0	0
APOBEC2	10930	4.3549	2.8588	216.361	2.7252	1.5498	9.4502	8.5068	2.0975	4.3695	3.0048	1.0764	1.6971	10.1769	7.2639	6.7514	3.1978	1.5308	3.118	3.4213	19.2539	2.8477	2.0534	5.1843	7.3278	5.8207	4.7399	2.0912	1.7301	3.3981	1.1244	41.9342	9.6899	4.8864	2.2516	2.8807	0.4986
APOBEC3A	200315	10.8873	4.0537	4.3758	27.7967	14.2632	34.3643	12.6325	9.4389	4.9938	75.5589	5.3283	2.9699	7.4014	12.8136	22.5048	8.5276	8.1643	6.3964	33.2356	13.6999	36.0702	10.3029	2.9147	12.213	0	18.0116	23.5263	7.4971	9.2233	5.622	8.4078	8.2364	5.2578	304.719	41.9753	7.4785
APOBEC3B	9582	121.938	67.9874	131.761	658.4	154.664	99.6564	289.357	125.852	70.5368	1599.32	180.355	26.7289	77.7148	389.123	322.719	13.8573	22.4518	80.4633	621.701	146.996	364.499	160.128	33.9516	138.251	150.175	46.451	349.758	191.465	180.583	93.3255	338.074	44.5736	61.8487	94.568	540.741	350.492
APOBEC3C	27350	562.33	117.782	279.567	118.272	447.372	814.433	132.462	143.681	551.81	358.774	232.508	35.6385	395.513	472.639	810.622	386.406	69.3966	504.232	517.595	389.521	1018.98	330.596	230.991	24.426	10.4773	347.909	184.028	297.001	504.854	327.202	347.006	503.876	378.207	44.2818	698.765	497.071
APOBEC3D	140564	305.934	20.5832	79.7374	88.8404	168.927	192.44	199.909	87.5721	918.851	133.413	15.07	44.1239	164.219	200.484	287.161	45.3028	25.0032	208.909	329.423	76.2751	231.134	52.8747	20.7373	231.07	20.9546	17.0636	347.667	46.7128	241.262	186.651	215.437	138.081	57.9852	34.5248	230.041	191.45
APOBEC3F	200316	424.061	261.292	157.53	305.219	248.482	305.842	425.946	456.214	985.643	722.356	368.138	268.137	234.532	542.373	378.53	360.823	45.414	419.154	393.939	467.278	591.362	407.084	336.406	464.582	55.8789	152.151	426.611	376.586	508.252	386.795	259.992	248.062	229.986	238.672	298.354	227.346
APOBEC3G	60489	869.352	253.288	223.654	283.962	584.27	285.223	284.369	383.849	1786.52	352.163	136.168	76.3683	429.744	420.823	754.36	254.762	16.8389	232.517	368.035	144.404	417.655	385.524	139.401	566.194	17.4622	170.636	504.509	133.218	477.185	274.355	217.01	134.205	100.66	49.1603	356.379	561.885
APOBEC3H	164668	34.295	4.574	4.862	11.9907	19.114	6.0137	9.1144	11.0121	134.207	4.8077	1.0764	0.8485	22.2042	1.937	9.0019	23.9838	11.7362	11.1359	20.5279	7.7756	9.0176	6.1602	2.8802	21.9834	2.3283	8.5318	26.6632	9.2272	5.3398	6.7464	3.1451	1.938	0.3258	0	8.642	58.3323
APOBEC4	403314	2.7218	0	0	2.1801	0	0	0	0	0	0	0	0	0.4626	0	0	0	0	0	0.4888	0	0.4746	0	0	0	0	0	0	0	0.9709	0.5622	0	0	0	0.7505	0.823	0
APOC1	341	1197.6	941.681	2161.18	333.015	1483.66	1699.31	486.708	21174.1	1873.91	6707.33	11814.9	317.353	985.775	435.351	656.24	469.55	688.353	192.428	1113.39	11046.6	7950.64	477.926	1733.87	1725.94	31500.6	819.054	38122.6	15600.3	362.136	293.469	619.578	2352.71	116.622	211.652	4923.05	1932.44
APOC1P1	342	0.5444	0.5718	0.4862	0	1.0332	1.7182	0.6076	294.179	1.2484	35.4567	36.0603	0.8485	0	0	0.9002	1.0659	3.0616	0.4454	0.9775	115.523	285.714	0.5133	1.1521	0.977	5.8207	0.948	632.597	21.3379	0	0	0	24.7093	0	0.3753	56.7901	0
APOC2	344	53.8922	182.39	128.358	568.47	235.568	170.103	23.0898	9175.67	191.011	1199.52	10536.6	469.241	103.157	777.724	78.7667	340.037	348.514	59.2428	829.912	5240.4	2602.28	105.236	319.124	178.31	134281	72.9944	17265.2	6286.62	25.7282	74.2107	619.578	1000.48	29.3183	28.5205	2126.34	461.174
APOC3	345	0.5444	165.237	0	3.8152	124.499	0.8591	22.4822	15252.8	0	5028.85	10965	6.7883	0	21.7918	14.4031	39.4401	771.527	6.2361	1.4663	5932.06	6034.65	18.9938	2.8802	122.13	121102	1.896	34016.5	10671.9	2.9126	19.1149	7.8627	1587.21	0.3258	112.581	4476.13	39.3868
APOC4	346	0	6.8611	2.431	0.545	11.3651	2.5773	2.4305	607.761	3.7453	98.5577	548.439	0.8485	0.4626	1.937	0.4501	4.7968	23.4724	0.4454	1.4663	311.025	271.476	0.5133	3.4562	2.4426	223.516	0.474	1996.08	627.451	0	0	4.1934	102.229	0.6515	0.7505	168.724	5.4842
APOD	347	1267.83	73.1847	3918.8	16.896	557.923	6.0137	49.2177	5.7682	198.502	3.0048	1.0764	23.759	82.8033	58.5956	97.6708	13.3243	176.553	105.568	196.97	10.3675	118.177	12.8337	19.0092	5.3737	0	90.0581	70.0562	6.9204	13.1068	19.1149	31.4507	5.814	15.9622	11.6334	1257.2	42.3782
APOE	348	6863.91	3599.2	6731.49	1700.5	6421.8	6524.91	2310.8	24835.9	14809.6	7710.34	15111.4	2423	4404.76	2459.56	1551.48	2101.52	1336.91	1332.74	3442.82	39447.6	8827.24	1876.8	5437.79	11066	49961.6	4922.38	31153.1	13812.6	1987.38	1311.06	2853.62	4810.56	655.102	1853.83	10809.1	9914.5
APOF	319	0	5.1458	0.4862	0	4.6494	0	2.4305	1114.84	2.4969	11.4183	358.988	1.2728	0.4626	4.3584	3.1507	6.9287	7.654	0.4454	0	810.886	296.63	0	0	1.4656	4.6566	0.474	658.215	306.228	0	2.2488	0	122.578	0	0.3753	511.523	4.4871
APOH	350	7.0768	922.241	74.8754	118.817	277.412	343.643	1169.07	18754.1	0	2433.29	7892.36	198.558	1224.93	2552.54	338.472	823.444	272.994	761.247	417.889	12016.7	12557.7	1006.16	411.866	524.67	62427.2	44.0811	30414.3	9358.13	323.786	583.566	1594.55	2683.14	814.399	2343.56	5905.76	129.129
APOL1	8542	7959.17	703.259	12706.9	7551.44	4735.63	2169.24	2279.81	2309.39	1282.77	543.87	3583.42	480.696	2627.04	819.855	4038.26	1176.81	1813.5	3626.73	2980.45	6033.51	1598.48	2276.69	2136.52	3095.75	5373.69	1202.04	5544.9	2435.41	2649.03	1047.94	1745.51	2707.36	891.604	775.307	6761.32	12845.6
APOL2	23780	1484.49	1323.61	2101.37	1824.77	2334.5	1715.64	1043.9	1180.91	1890.14	1212.74	1793.33	736.954	1263.79	879.419	1362.89	1537.63	875.622	1264.59	1467.74	2477.83	725.676	1551.33	2279.95	2055.69	3789.29	878.303	1817.8	1231.83	1024.76	600.994	703.447	1949.13	647.61	526.879	1451.03	3324.94
APOL3	80833	1119.22	233.848	851.829	534.678	2006.97	289.519	524.989	557.944	2420.72	148.438	829.386	448.876	1468.25	173.366	1483.52	643.299	49.4961	1864.14	862.17	698.324	701.471	563.655	157.834	1040.55	6008.15	292.452	1866.95	562.284	210.68	776.963	258.944	319.283	138.448	249.179	496.708	1946.4
APOL4	80832	213.391	146.941	255.257	588.091	156.012	35.2234	23.0898	111.694	162.297	34.8558	38.7513	60.6703	205.852	29.0557	132.778	68.2206	155.632	88.196	76.2463	102.194	84.9549	68.7885	176.843	21.9834	16.298	56.4048	131.225	141.869	31.068	56.2202	0.5242	65.8915	22.8032	22.8915	46.5021	255.266
APOL5	80831	0	0	0	0.545	0	0	0	1.5732	0	0	0	0.8485	0	0	0	0	0	0.4454	0	0	0	0	0	0	0	0	0.5228	0.5767	0	0	0	0	0	1.1258	0.4115	0
APOL6	80830	1887.86	1404.23	2289.53	3323.07	4532.61	3292.1	733.404	2877.82	1417.6	702.524	994.618	1113.7	2447.55	800.968	3000.79	1517.38	712.336	1746.55	2165.69	1949.46	1859.52	1248.46	1143.43	2971.18	4081.49	1008.65	2563.33	2205.88	1473.3	1530.31	809.855	1288.76	773.353	1480.44	1152.67	2421.04
APOLD1	81575	927.055	702.687	683.117	1502.11	386.413	306.701	568.13	372.837	511.236	159.621	214.483	263.895	430.67	479.419	1375.04	260.624	167.368	871.269	784.027	615.014	787.85	213.039	600.23	357.108	288.708	535.135	331.46	719.723	245.146	906.832	612.764	513.081	268.989	1987.8	877.778	529.976
APOM	55937	33.7507	67.4671	31.1171	766.317	79.0391	348.797	1026.89	1734.14	99.2509	1081.73	782.562	58.549	98.5313	594.673	96.7706	517.518	146.958	75.2873	210.166	996.038	578.073	235.113	524.77	381.534	449.36	9.4798	2856.84	1276.24	292.233	50.5982	610.143	466.57	25.0867	117.478	254.757	33.404
APOO	79135	199.238	511.721	179.895	345.006	231.951	256.873	334.802	200.839	113.608	159.255	268.568	326.262	305.308	327.845	309.216	554.826	348.004	262.361	279.57	291.771	234.457	573.922	658.41	404.494	968.568	347.435	316.298	280.277	149.029	265.359	191.849	563.469	270.055	942.678	288.889	425.776
APOOL	139322	85.4654	114.351	92.865	150.429	108.485	152.921	10.3296	160.462	19.3508	31.25	72.1206	123.038	179.484	85.7143	251.153	152.43	146.958	188.419	154.936	154.031	289.036	54.9281	26.4977	57.6453	179.278	106.648	67.965	92.2722	103.398	119.749	206.002	178.779	116.622	350.127	107.407	67.3065
APP	351	22682.6	53126.4	15422.4	22979.7	26538.6	54390	16773.5	63660.2	2792.13	19075.1	31243.8	27046.7	17983.1	42136.1	13215.7	32660.6	13382.8	16543	14371.9	46512.6	47251.5	11731.5	23866.9	41777.2	4034.92	20459.3	24903.9	27874.9	27789.3	18850.1	16187.1	25490.8	61824.9	18086.1	19515.6	15068.2
APPBP2	10513	887.316	635.22	563.997	930.372	1038.36	729.381	349.992	1182.49	667.291	547.476	653.391	748.409	861.802	769.491	815.573	645.431	782.753	661.915	900.293	1235.21	888.942	501.54	466.014	750.366	318.976	637.516	664.488	722.03	975.243	766.844	1712.49	1197.19	601.026	995.591	767.49	623.208
APPL1	26060	817.638	540.297	1007.9	1007.22	887.511	462.199	369.436	856.319	980.649	653.245	585.038	1324.57	782.237	702.179	841.229	644.898	873.581	731.403	765.396	499.491	1898.43	434.292	345.622	340.498	403.958	990.165	691.152	1202.4	657.282	852.861	540.951	720.446	944.702	1472.18	760.082	971.208
APPL2	55198	1072.94	1553.46	798.833	799.564	967.067	2956.19	1646.67	1206.61	559.301	2069.11	2391.28	756.47	848.849	1866.83	1228.76	1433.7	772.037	2645.88	2265.4	1166.34	857.143	2174.02	938.94	1019.05	571.595	574.95	1050.84	1795.85	2082.52	1216.04	1423.14	1217.54	382.767	1839.57	1640.33	993.145
APRT	353	2224.28	3160.66	2018.23	4348.82	1553.4	1034.36	7204.62	3730.47	4280.9	3803.49	5916.04	1866.36	2458.19	1953.03	2549.79	1954.41	2369.69	853.898	1218.96	1658.06	1947.79	1320.84	6303	3097.22	1894.06	5995.97	2664.75	3109	2580.1	1280.7	1275.32	2598.84	2094.63	1299.56	2074.49	2081.52
APTX	54840	363.636	663.236	486.69	344.461	433.94	317.869	873.766	286.314	602.996	456.13	1038.21	437.42	597.201	198.547	269.607	670.481	700.6	404.009	420.332	449.875	437.114	507.187	827.765	388.373	526.193	541.296	358.123	638.408	271.845	457.07	260.516	256.783	808.535	392.907	253.086	690.016
AQP10	89872	3.2662	2.8588	1.4586	3.2702	0.5166	202.749	1.8229	0.5244	1.2484	0	1.6146	7.6368	0	3.8741	1.3503	0.533	0	0	16.129	4.8135	0.4746	0	0	0.4885	55.8789	0	0	0	0	1.1244	0	0	13.6819	481.471	0	0.4986
AQP11	282679	29.3958	23.442	17.5033	161.875	25.3132	30.9278	28.5584	62.9261	6.8664	26.4423	48.9774	19.9406	40.7078	13.5593	21.1545	30.9125	21.9416	25.3898	29.3255	29.6214	28.0019	22.5873	27.0737	162.677	82.6542	17.0636	111.358	18.4544	61.165	13.4928	139.955	85.7558	9.1213	21.7656	23.8683	35.3982
AQP12A	375318	0	0	1.4586	25.6166	0	0	0	0	0	0	0	0	0	0.4843	0	0	0	0	0	0	0	0	0	0	0	0	0	0	0	0	0	0	0.3258	0	0	0
AQP12B	653437	0.5444	0	9.7241	431.666	0	0	0	0.5244	12.4844	0	0	1.6971	0	0.9685	0	0	1.5308	0	0	0	0	0	0	0.4885	1.1641	0	0	0	0	1.1244	0.5242	0	1.6288	0	0.4115	0
AQP1	358	10682.8	148933	5413.26	27050.6	88381.8	60822.3	69886.7	1367.59	2530.59	57543.3	42039.7	1457.28	40258.1	18963.6	45717.2	23762.7	1352.68	36044.7	29432.6	12803.4	21104.9	68334.7	83736.2	976.507	682.98	105634	4502.27	130329	25817.9	1335.23	21833	76844.1	38245.2	2313.59	31274.1	4928.92
AQP2	359	20.6859	0	43.7584	3.2702	0	6.8729	0	0	0	1.2019	0	0.4243	0	7.7482	0.9002	0	18.88	0	7.8201	0.3703	0.9492	0	0	0	0	0	0	4.6136	0	1.6866	0	0	0	2.2516	0.823	0
AQP3	360	1592.81	6715.84	2489.36	1898.35	1569.93	7764.6	3369.89	821.185	795.88	1859.98	963.94	520.577	1237.89	2649.39	5264.32	1464.61	4311.77	3653.01	615.836	2271.59	7308.5	3803.39	2291.47	670.738	1484.28	1346.13	1389.1	4747.4	650	2426.46	2512.38	471.899	10084.5	68668.4	981.07	484.607
AQP4	361	8.1655	81.761	8.2655	2.7252	43.394	69.5876	63.8007	87.0477	3.1211	147.236	22.605	94.6118	266.913	132.688	214.245	18.6541	0	36.5256	51.8084	15.181	157.57	71.3552	24.1935	33.2193	12.8056	187.7	119.723	130.911	181.553	27.5479	86.4893	39.2442	13.0304	66.4227	34.5679	5.4842
AQP5	362	3925.97	0.5718	2464.08	527.047	4.1328	504.296	29.7737	0	0	126.202	0.5382	135.766	0	295.884	14.4031	0	1370.58	5.7906	334.311	0.7405	3.7969	4.6201	0	0	9.3132	0	2.0912	5.767	1.9417	24.1747	0	2.4225	0	32.2732	103.292	1.4957
AQP6	363	54.9809	1.1435	55.4273	13.6258	2.0664	6.8729	0	0	0	3.6058	3.7675	2.9699	0	6.7797	4.0509	2.1319	77.0506	0.8909	16.129	0.7405	4.2715	1.0267	0.576	1.4656	0	0.474	1.0456	8.6505	0	2.2488	0	13.5659	0	26.2689	3.2922	1.4957
AQP7	364	17.4197	212.693	57.8583	39.2424	15.4979	256.014	151.299	89.1453	13.7328	135.216	23.1432	48.7908	107.783	120.581	424.44	107.661	69.3966	132.294	23.9492	84.421	166.113	95.4825	62.788	26.8686	110.594	61.6187	125.997	282.007	68.4466	28.6723	81.2475	33.9147	266.146	163.242	36.214	7.4785
AQP7P1	375719	8.7099	1.1435	10.2103	0	2.583	1.7182	4.2534	9.4389	6.8664	5.4087	8.0732	0.8485	0	8.2324	6.3013	3.7308	10.7157	6.6815	10.7527	12.5891	11.3906	2.5667	1.1521	2.9311	204.889	0.474	41.3018	11.534	6.7961	2.811	2.0967	13.0814	9.7728	0.3753	10.6996	9.4728
AQP7P3	441432	2.7218	0.5718	8.7517	0	0.5166	0	0.6076	2.6219	0.6242	3.6058	2.6911	0	0	1.937	0.4501	0	2.0411	0	6.3539	2.9621	0.4746	0.5133	0	0.4885	19.7905	0	6.2737	2.8835	0	0	0	1.938	0.3258	0	3.7037	5.4842
AQP8	343	0	0	14.5861	0	1.0332	0.8591	9.1144	0.5244	0	4.8077	0	2.1213	0	1.4528	0	0	0	1.3363	0.4888	1.8513	0.9492	0	3.4562	0.4885	15.1339	0.948	2.0912	1.1534	0.4854	1.1244	0.5242	0.4845	0.3258	62.2948	1.6461	0
AQP9	366	78.3887	30.8748	100.158	390.244	92.9872	19.7595	17.0135	2473.52	3.1211	63.101	425.727	8.0611	49.4969	6.7797	29.7063	33.5773	121.954	63.2517	20.0391	1128.95	1244.42	33.8809	10.3687	21.9834	3476.14	100.96	3968.63	949.827	16.0194	78.1461	14.1528	217.054	8.144	1736.37	540.741	104.699
AQPEP	206338	6.5324	1.7153	5.8344	3.2702	4.1328	0.8591	0	0	0.6242	3.0048	0	1.2728	0.9252	4.3584	14.8532	0.533	2.5513	1.7817	2.4438	0.7405	4.7461	1.0267	1.1521	0	9.3132	5.6879	2.0912	0.5767	2.9126	1.1244	2.6209	1.4535	1.303	5.629	1.2346	1.4957
AQR	9716	593.359	612.922	654.431	1085.16	661.759	579.038	199.909	573.152	643.571	630.409	714.747	757.743	1008.9	475.06	644.987	1582.4	934.813	791.091	639.785	535.037	789.274	356.263	314.516	266.243	386.496	641.782	386.355	561.707	640.777	980.48	744.332	607.558	703.64	927.292	770.37	431.759
AR	367	17.9641	16.5809	32.5757	93.7457	39.2613	1.7182	11.5449	58.731	0	0.601	6.4586	2.9699	138.314	0.9685	4.501	2.6649	1.5308	6.6815	16.6178	49.6158	41.7655	1.0267	1.1521	0	175.786	3.3179	14.6386	28.2584	3.8835	3.3732	268.903	34.3992	14.9849	44.6571	23.4568	12.9627
ARAF	369	1951.01	1695.25	1957.94	1775.72	1641.22	2103.09	3407.56	1264.81	2579.28	893.029	1583.42	1476.03	1959.99	2607.26	1738.27	1846.22	1562.95	1706.9	1744.87	1596.96	2015.19	3888.6	2256.34	2109.43	2209.55	1598.77	1796.89	1756.06	2059.71	1781.62	2119.25	1960.76	1381.55	1386.62	1430.04	1630.81
ARAP1	116985	3307.46	3785.48	3515.67	1248.09	2524.06	2769.76	4614.9	2121.65	5789.56	2270.37	1436.41	2061.05	3633.61	1529.27	2777.91	2780.5	8733.05	2347.76	1888.85	2188.64	2661.06	3436.33	4874.97	3276.49	1511.01	2877.48	3191.03	2204.15	4062.12	3180.91	2975.17	2247.57	2484.82	2170.85	2131.98	2647.38
ARAP2	116984	497.006	624.357	682.144	603.897	1046.11	739.691	293.483	2004.72	777.154	849.159	514.532	1078.91	579.623	890.557	1357.94	989.199	214.823	1183.52	620.235	334.352	1486.95	625.257	331.221	237.421	623.981	868.349	789.962	1147.06	369.903	1418.44	404.665	915.698	477.563	404.541	568.724	299.14
ARAP3	64411	901.47	267.582	549.41	672.571	241.767	200.172	292.268	412.166	342.072	117.188	141.012	252.864	232.682	1121.55	926.747	222.25	388.315	870.824	1182.31	538.739	260.56	422.485	292.627	98.681	165.309	252.163	467.913	354.095	1560.68	1206.49	381.077	653.585	797.459	568.158	707.407	639.661
ARC	23237	19.0528	8.0046	19.4482	10.9007	2.583	5.1546	6.0763	6.817	3.7453	3.6058	63.5091	1.6971	3.2381	1.937	8.1017	17.0552	4.0822	4.0089	1.955	1.8513	174.656	4.1068	21.3134	2.9311	2.3283	118.023	6.2737	4.0369	2.9126	6.7464	1.5725	7.2674	1.6288	13.885	13.1687	0.9971
ARCN1	372	4955.36	3606.63	5179.53	3870.83	3263.33	4369.42	2151.6	3872.05	2024.97	2028.25	1929.49	3553.67	3219.61	1694.92	2146.06	4266.99	2779.95	3187.53	1930.6	3867.81	3469.86	2119.1	3172.81	3772.35	3473.81	4314.26	2174.88	3541.52	4033.01	3265.83	1851.92	3836.72	3887.94	3491.51	4536.21	4477.13
AREG	374	341.317	162.95	945.181	152.064	4.6494	134.88	46.7872	35.1337	39.3258	12.0192	173.843	16.9707	8.7892	42.1308	228.649	34.1103	17.3492	86.4143	22.9717	7.4054	121.974	101.129	26.4977	15.6326	16.298	764.546	31.8913	127.451	62.6214	136.053	35.6441	9.2054	18.2425	114.457	521.399	316.091
ARF1	375	10070.8	15720.4	10186.5	16714	12126	9500	13680.1	9828	8014.98	11632.8	10868.7	20445.5	12817.9	12986.9	9478.11	28569.5	15814.3	9374.16	12134.9	13266.7	10172.8	12751	13418.8	13011.2	28793.9	14168	10882.8	12888.7	11879.1	15713	9767	20890	25294.6	9163.71	18691.4	15133
ARF3	377	5106.15	5503.14	3073.78	5033.38	6540.1	6273.2	4481.85	4235.97	2856.43	4019.83	4744.35	4179.89	4497.28	4101.69	4801.62	4520.68	2887.1	6599.55	3791.3	7212.81	3219.27	4779.26	4721.2	5851.98	2315.48	5492.12	4377.47	5504.61	3987.38	4344.7	6833.7	6432.65	4774	4853.36	4360.49	4173
ARF4	378	3547.09	2823.33	8460.44	4218.01	3700.89	3021.48	1810.12	3579.97	1289.64	1515.02	2769.64	4078.91	2348.1	1554.96	1788.68	3627.42	3462.18	2221.38	2102.15	4721.65	4688.66	1840.86	2540.9	3577.92	1622.82	3116.96	2387.14	6446.37	3387.86	2505.73	1616.04	3158.91	3664.14	2869.31	2999.59	7977.07
ARF5	381	2942.24	4503.61	2816.58	5386.56	3085.06	2237.97	8072.9	3273.73	3717.21	8099.71	6753.98	2657.55	2230.55	4015.95	2606.9	2354.63	4192.88	2543.76	2755.02	2141.57	2611.3	4592.92	3669.93	6159.69	2798.6	3556.82	3861.46	4449.72	2111.14	2666.47	3471.07	3347.35	2954.64	3507.95	2427.05	2705.72
ARF6	382	3557.43	1674.67	4685.55	3582.5	2718.84	6858.25	2215.4	5274.78	4139.2	4525.84	2882.67	2131.52	3472.19	2765.13	2227.07	3106.7	2659.52	2657.02	2058.65	3913.73	4301.38	3338.81	1413.59	2741.08	1810.24	2932.57	3180.24	4976.36	3957.77	2826.75	1817.32	2223.84	4725.79	3076.84	2370.37	2791.97
ARFGAP1	55738	2567.77	1684.39	2089.7	1528.27	2170.73	2082.47	3896.7	1362.87	3419.48	3160.46	2022.07	1529.49	1710.65	2383.54	1510.52	1150.16	2965.68	1085.52	2613.39	3392.39	1724.73	3077.52	2668.78	2381.53	1732.25	1539.04	1753.5	1905.42	2306.31	1471.28	1636.48	1353.2	2175.1	1084.53	1917.28	2103.45
ARFGAP2	84364	2215.57	2866.21	2121.31	1490.67	1901.59	2274.91	3833.51	1864.18	3602.37	1849.16	2598.49	1973.27	2556.72	2726.88	2340.5	2003.98	2137.52	1913.59	1508.31	1504.4	1231.61	2662.22	3365.78	2896.92	3498.25	1794.05	1660.96	1704.15	1930.58	2040.79	1993.97	1583.82	2071.18	1835.82	1754.73	1732.02
ARFGAP3	26286	1525.86	1053.74	2629.88	1272.11	1449.57	2448.45	401.033	2509.18	729.089	1076.32	1459.1	1057.28	768.359	1324.94	2268.03	1312.18	1446.1	1574.16	1444.28	1929.09	974.371	1131.42	1097.35	2465.56	1224.68	920.014	1212.39	1794.12	1491.75	1447.67	897.916	1013.08	1013.76	1070.64	1820.58	1731.02
ARFGEF1	10565	1645.71	1250.7	1490.22	3687.7	1830.93	1300.79	809.965	1478.28	1032.46	1130.47	571.044	1419.3	1368.84	2421.38	2181.23	1412.38	1214.12	2756.41	1023.1	2121.68	1141.01	1094.99	646.93	620.909	944.272	1256.55	696.38	1109.01	1282.19	1769.3	2095.19	1607.07	3277.36	2564.09	1811.9	1089.87
ARFGEF2	10564	1628.74	1467.12	993.315	1957.76	1985.79	2374.57	373.082	1989.51	724.095	741.587	1194.83	1610.1	1959.06	1225.18	2019.58	1556.28	1852.79	1726.5	2313.78	3477.55	1489.32	1104.21	567.972	999.023	2722.93	1092.07	997.517	1286.04	1702.91	1469.6	1950.99	1203.49	2006.68	2859.18	2271.6	748.847
ARFIP1	27236	991.29	930.246	1582.11	867.148	626.63	786.942	557.193	940.22	511.86	461.538	615.716	773.865	522.262	866.344	830.427	633.706	818.982	902.005	1018.57	632.787	923.113	707.905	389.401	349.78	522.701	616.187	577.702	628.028	1138.84	995.66	450.269	449.612	1034.61	989.586	641.152	890.939
ARFIP2	23647	1342.95	1178.96	1478.06	855.157	1154.59	1109.97	1615.07	932.355	1167.92	764.423	1719.59	999.576	1389.61	678.45	931.698	632.64	1732.87	1202.23	1574.78	800.889	750.831	1285.42	1422.23	1555.94	1357.39	1535.73	667.102	641.869	767.961	602.681	1095.01	678.295	1195.86	830.472	1134.16	1335.66
ARFRP1	10139	1610.23	1100.63	1226.69	820.82	1523.96	1197.59	3196.11	744.101	2335.21	2041.47	1044.67	663.555	1352.61	1204.36	1110.84	636.371	630.693	865.924	1320.63	1115.25	888.467	2641.68	2157.83	1454.81	1525.03	1323.85	1174.23	1006.92	1335.92	1071.56	927.27	1214.63	1434.97	554.273	1725.1	1479.25
ARG1	383	0	23.442	0.4862	1.0901	8.7821	0	1.8229	1649.71	11.236	55.2885	858.45	0.8485	2.7755	13.0751	1.8004	3.7308	29.0853	1.3363	0.4888	1547.72	651.163	9.2402	0	0.4885	6498.25	0.948	1565.81	1167.24	0	2.2488	0	280.523	0.3258	47.6593	856.379	15.9541
ARG2	384	268.236	93.1218	164.517	448.568	56.9288	331.461	41.3064	141.505	51.1798	43.8221	39.0635	87.255	53.1421	57.3705	129.601	91.9113	377.431	89.0735	59.1642	136.855	76.8628	47.2177	38.4101	59.8192	227.171	63.3156	73.3028	164.066	153.893	62.9947	57.4342	63.4205	53.0304	145.432	91.8889	148.822
ARGFX	503582	0	0	0	0	0	0	0	0.5244	0.6242	0.601	0	0	0	0.4843	0	0	0	0	0	0.3703	0	0.5133	0	0	0	0	0	0	0	0	0	0	0.3258	0	0.4115	0.4986
ARGFXP2	503640	1.0887	0	1.4586	0.545	1.0332	1.7182	0	1.0488	1.2484	0.601	0.5382	2.1213	2.7755	0.9685	1.8004	2.6649	3.0616	1.7817	0.9775	1.4811	1.8984	1.0267	0	0	0	0.948	1.0456	0.5767	1.9417	2.811	1.0484	0.969	1.6288	0	1.6461	0.9971
ARGLU1	55082	1845.94	2062.32	3047.04	2230.28	1319.9	3036.94	903.539	1041.43	4954.43	630.409	1139.94	2288.5	1786.98	2180.15	1104.53	1671.94	5088.91	916.258	7721.9	1924.65	1293.31	914.271	1371.54	591.109	2029.1	1760.4	1452.36	2284.31	2239.81	1268.33	1625.47	1427.33	2167.93	1830.57	1565.43	1174.12
ARHGAP10	79658	340.773	306.461	331.105	56.1384	181.325	95.3608	136.716	255.375	385.144	168.269	449.946	89.0963	82.3407	131.235	58.5124	49.5666	97.9717	192.873	189.638	85.9021	157.57	216.119	194.701	66.9272	27.9395	181.538	130.179	90.5421	93.6893	110.754	101.691	109.496	98.0536	389.53	170.782	447.713
ARHGAP11A	9824	134.458	154.374	141.972	835.536	382.797	64.433	33.4194	225.485	147.94	460.938	400.431	165.889	103.62	609.685	455.947	555.892	802.143	119.822	377.81	145.515	444.233	235.113	116.359	78.1632	407.45	345.065	96.1966	231.834	283.981	242.309	194.994	313.469	175.259	102.449	147.737	518.509
ARHGAP11B	89839	5.4437	6.2893	9.5247	61.5888	30.4791	6.0137	0	19.9266	4.9938	21.2921	34.7417	13.5766	12.9525	34.8668	44.5595	51.917	81.342	17.8174	29.3255	19.2539	35.121	4.6201	0.576	0.977	10.943	25.5954	2.614	14.9942	13.1068	15.1795	11.5319	9.7578	15.6365	4.128	17.6955	14.957
ARHGAP12	94134	1135	1550.03	723.471	587.001	1331.78	2707.9	397.387	1730.99	408.24	1293.27	1370.29	1437	989.939	1439.71	1426.35	3065.66	808.266	2413.81	1200.88	1523.28	1309.92	903.491	569.701	964.827	772.992	1196.82	932.166	1953.29	1146.12	1515.7	938.802	647.771	1923.61	1237.26	1330.45	610.245
ARHGAP1	392	3810.56	3945.11	4369.03	2085.84	4363.68	4937.29	3112.26	4384.37	2715.98	2246.39	3256.73	4455.66	2664.51	2291.04	3985.15	5955.45	2094.14	4015.59	2383.19	3905.21	2486	3012.32	3316.24	4912.07	2387.66	3537.39	2079.73	2074.39	4306.8	4422.28	4434.54	6722.38	5094.55	4469.46	3785.6	3593.17
ARHGAP15	55843	225.912	72.0412	48.1342	38.6974	95.0536	27.4914	139.754	80.7551	1466.92	11.4183	53.2831	12.728	138.314	6.7797	50.8608	26.6487	7.1438	72.6058	139.296	34.8051	127.67	37.4743	41.4747	36.1505	12.8056	56.4048	243.628	73.8178	26.2136	26.9857	44.5551	15.0194	16.6137	22.1409	189.3	56.8366
ARHGAP17	55114	1331.52	673.528	1024.92	1482.49	870.464	603.093	552.939	689.565	3098	820.312	688.375	1125.16	1148.14	877.966	914.144	659.822	923.077	877.951	1028.84	998.241	1026.58	705.339	722.35	1254.03	583.236	930.442	1013.72	807.958	934.952	1289.69	1069.32	801.841	947.308	1195.61	1049.79	1516.14
ARHGAP18	93663	1063.15	328.188	831.409	655.675	354.901	226.804	77.7761	343.471	237.203	117.788	421.959	1139.16	332.601	181.598	461.798	457.291	852.66	373.274	462.366	708.692	592.311	253.08	135.369	152.907	220.023	536.082	282.316	177.047	205.825	835.994	220.155	209.302	435.54	2139.04	398.765	1135.73
ARHGAP19	84986	222.646	414.523	257.202	349.911	281.545	439.003	374.905	402.202	579.9	203.726	290.635	771.319	388.111	630.024	516.71	271.284	511.29	312.695	279.57	264.371	525.866	357.289	234.447	124.573	470.314	437.967	341.393	243.945	217.476	184.74	564.539	222.384	906.588	272.446	1010.29	208.401
ARHGAP20	57569	50.0817	73.1847	39.3825	6.5404	15.4979	0.8591	1.2153	39.8532	17.4782	0.601	3.7675	2.1213	15.2654	2.4213	12.1526	6.3957	2.5513	9.3541	11.7302	13.3296	29.4257	1.54	0.576	0.977	13.9697	22.7515	15.1614	5.1903	5.8252	10.1196	4.7176	6.7829	2.2803	8.2559	14.4033	80.7678
ARHGAP21	57584	1999.46	1585.48	2315.3	887.314	1389.13	2559.28	514.659	1795.49	345.193	1265.02	1533.37	1840.48	1688.45	1682.81	2043.88	747.762	761.322	2340.31	2000.49	1747.29	1889.89	902.464	796.659	1053.25	863.795	2217.8	1344.14	1265.28	1176.7	1416.75	1002.75	785.368	3465.43	2173.94	1918.52	2529.23
ARHGAP22	58504	126.293	57.7473	128.844	27.7967	139.481	66.1512	51.0406	90.194	900.749	43.8702	447.255	15.6979	165.607	41.6465	99.021	85.2758	95.4203	99.3318	162.757	52.2077	46.9862	145.791	308.756	136.786	13.9697	227.041	106.13	96.8858	41.2621	156.292	77.0541	76.5504	58.9625	13.885	59.2593	2170.76
ARHGAP23	57636	2485.57	244.711	1747.9	378.798	516.596	213.058	235.759	287.887	523.096	94.351	724.435	424.692	562.97	215.012	426.241	540.435	1204.75	497.55	595.797	671.665	429.995	196.099	332.373	272.106	401.63	307.619	451.706	289.504	339.806	549.834	1277.95	408.915	399.381	522.375	601.235	1603.39
ARHGAP24	83478	440.392	1272.73	317.977	175.501	222.653	29.2096	632.538	136.34	770.911	608.774	116.792	150.615	1025.1	452.3	583.324	50.6325	72.9685	231.626	265.885	142.923	209.777	438.912	629.032	347.826	194.412	177.746	612.73	1634.95	244.175	115.251	713.406	338.178	139.425	604.935	349.383	831.609
ARHGAP25	9938	488.296	202.401	221.223	160.785	456.154	80.756	95.3972	242.265	4983.15	26.4423	83.9612	83.1566	529.201	44.0678	137.279	107.661	82.1533	269.933	259.042	183.653	431.894	174.025	111.175	115.779	34.9243	105.7	637.302	96.3091	141.262	308.087	178.22	104.651	50.4927	77.3056	347.737	348.498
ARHGAP26	23092	707.676	395.655	2019.21	681.837	985.664	474.227	470.302	316.728	473.159	305.889	278.794	382.69	247.947	433.898	1860.25	232.91	1101.67	1152.78	897.361	313.617	658.282	408.111	133.065	224.231	678.696	474.464	808.26	583.045	604.369	498.111	1066.7	212.694	475.609	3251.71	565.844	365.948
ARHGAP27	201176	1356.5	1182.94	1943.84	2499.52	1078.65	1514.59	396.78	872.05	2841.45	724.76	1259.96	1071.28	676.304	899.274	975.357	381.609	1599.69	602.209	1368.02	771.638	1151.87	578.029	1103.11	868.588	377.183	781.116	985.456	1249.13	1322.82	981.605	1078.76	702.519	1056.44	546.768	1169.55	556.899
ARHGAP28	79822	66.4126	26.3007	63.6927	14.7159	32.0289	11.1684	13.9754	19.9266	34.9563	30.649	6.9968	18.2435	23.592	3.8741	16.6535	13.3243	2.5513	74.833	86.999	119.596	46.5116	8.2136	9.7926	5.3737	8.149	7.1098	19.3439	21.9146	3.8835	69.7131	46.1276	22.7713	6.1894	914.157	16.8724	5.9828
ARHGAP29	9411	1695.7	2347.63	918.439	297.588	4303.76	1360.82	864.651	2967.49	284.644	1525.24	1206.67	3263.05	5193.01	2876.03	4361.43	2237.42	436.79	3183.96	2310.85	5962.05	2523.97	1834.19	541.475	1340.5	243.306	2225.38	1696.51	2077.85	4935.44	2970.11	5445.68	3834.3	1095.53	1207.62	2558.44	1053.97
ARHGAP30	257106	855.743	339.051	452.656	371.168	869.431	231.959	246.088	405.349	7310.24	87.7404	203.983	140.008	1174.97	192.736	274.108	240.371	114.3	246.771	692.571	331.389	786.901	327.515	248.272	216.414	68.6845	353.122	976.082	151.672	133.01	353.625	307.692	156.492	197.41	273.196	839.506	821.638
ARHGAP31	57514	778.443	256.718	445.849	604.987	411.21	136.598	168.92	248.034	637.328	34.8558	55.9742	145.1	442.697	85.7143	343.423	120.452	64.8042	297.995	388.563	402.111	498.813	110.883	160.138	85.0024	100.116	262.116	352.895	211.649	146.602	385.671	262.613	243.217	171.675	468.337	308.231	622.71
ARHGAP32	9743	1210.13	389.365	1173.21	601.172	294.976	975.086	118.487	886.733	115.481	359.375	192.142	1028	345.553	452.784	683.695	1455.55	1297.61	684.187	584.555	522.447	745.135	433.265	175.115	357.596	252.619	922.384	338.256	262.399	551.942	1444.86	304.547	599.806	926.46	809.082	1107	412.315
ARHGAP33	115703	126.293	228.702	191.564	304.129	236.601	235.395	143.4	240.168	590.512	344.952	337.46	289.351	157.743	1065.38	372.229	283.009	150.529	189.755	456.012	128.113	265.306	151.437	178.571	203.224	564.61	597.701	262.449	287.774	291.748	225.443	150.439	161.337	291.229	374.144	159.671	215.381
ARHGAP36	158763	54.4366	0	7.2931	0	0	0	0	0	0	0.601	0	0	0	0	0	0	0	0	0	0	0	0	0	0	0	0	0	0	0	0	0.5242	0	0	0	0.4115	0.4986
ARHGAP39	80728	392.488	212.121	172.602	427.851	141.547	130.584	178.642	85.999	46.1923	394.231	243.272	315.231	82.8033	543.826	380.781	60.226	760.811	338.085	848.974	335.092	117.228	276.694	129.608	104.055	119.907	169.214	322.049	192.042	259.223	342.943	170.882	121.609	621.549	146.731	728.807	265.237
ARHGAP42	143872	370.147	111.424	661.218	314.484	251.065	247.423	68.6617	94.9135	44.3196	129.207	41.4424	32.6686	50.4221	37.7724	366.378	30.3795	45.414	199.933	225.684	122.558	272.425	46.7146	14.4009	15.1441	95.4598	139.765	150.046	248.535	149.515	203.45	494.824	34.3992	96.7505	238.296	140.712	57.3352
ARHGAP4	393	1932.5	440.823	480.37	640.959	1326.62	3586.77	2455.42	459.885	16681.6	1220.55	509.15	2186.25	2369.84	5238.74	381.681	2831.69	462.814	497.105	3090.42	556.512	807.784	453.799	589.286	3023.45	1497.09	548.88	2420.08	376.586	322.33	1314.43	912.593	3186.53	2571.87	216.531	1855.56	1239.94
ARHGAP5	394	2409.91	1052.6	2625.02	2381.8	1398.94	2227.66	426.553	1969.59	648.564	1211.54	990.85	2058.55	2611.77	899.758	1178.35	2794.91	2251.31	1822.72	1554.25	1487.36	2513.53	970.226	380.76	810.454	1781.14	2223.01	1125.6	1780.85	1650.49	1673.68	1295.77	1071.22	2354.91	2880.95	1272.43	572.355
ARHGAP6	395	139.902	48.0274	33.5481	46.8729	39.2613	41.2371	62.5854	54.5359	71.7853	15.625	15.07	40.3055	28.6805	317.191	52.6612	47.4347	13.7773	218.263	138.319	56.2807	50.3085	41.5811	22.4654	17.5867	30.2678	48.347	53.3264	138.985	54.3689	82.0815	110.602	49.4186	74.9247	96.8196	198.765	114.67
ARHGAP8	23779	407.833	367.947	209.87	508.647	381.459	409.21	461.382	368.721	20.4806	862.242	424.08	496.529	11.5647	202.833	754.941	59.5332	782.921	261.421	502.121	1110.81	134.39	737.161	54.3145	202.877	65.9022	72.1128	288.773	238.893	92.7913	422.709	11.49	51.7733	603.688	165.325	848.432	65.1926
ARHGAP9	64333	419.706	219.554	189.133	185.311	476.301	153.78	165.274	135.815	6536.83	45.6731	147.47	27.1532	393.663	42.615	97.6708	87.9407	67.8658	183.073	224.829	102.934	256.289	174.538	139.977	101.612	12.8056	285.342	513.92	78.4314	86.8932	79.2705	118.464	41.6667	15.9622	13.5097	318.107	436.246
ARHGDIA	396	8934.68	8386.51	8502.73	6231.37	8088.85	13777.5	12858	9415.84	10407.6	8843.75	16324.5	5991.51	6527.12	7279.42	6475.53	7301.74	8006.63	5322.94	4889.54	5963.53	5639.77	8101.64	15043.8	6852.96	11076.8	11106.5	6999.35	9704.15	9338.35	7223.17	7333.77	9732.56	8953.17	3957.22	7993.42	11860.4
ARHGDIB	397	5658.14	1774.16	2461.16	1754.46	3075.29	941.581	1800.39	1770.84	22858.9	470.553	1116.79	847.264	2612.7	558.838	1410.15	956.155	1018.5	1784.41	2800.59	1576.6	2215	1493.33	2044.35	1216.41	462.165	1757.55	4072.15	1361.59	1118.93	1600.59	1168.39	1019.38	1062.95	1005.35	2469.14	5116.29
ARHGDIG	398	0.3538	2.6644	2.7471	22.499	0	0	2.4305	1.0488	0.6242	0	2.1529	13.0759	0	0.4843	1.5708	2.9953	0.5103	0	0.4888	0.3703	0.9492	1.54	5.1843	0.4885	0	0.0569	0.5228	0.5767	0	0	0	0.969	24.3277	0.4991	0.823	0.4986
ARHGEF10	9639	502.994	1202.4	516.835	327.565	1265.66	524.055	329.941	493.445	271.536	593.149	298.17	816.716	868.278	598.547	644.087	1362.28	360.76	773.274	488.27	585.393	572.852	201.745	362.327	376.16	135.041	1092.07	321.527	454.441	341.262	825.313	422.487	1094.48	701.034	698.752	414.403	876.48
ARHGEF10L	55160	909.091	1686.11	1089.58	1100.97	1229.5	1046.39	1161.17	1700.58	291.511	992.188	1168.46	971.998	1643.58	1185.47	1442.11	2656.34	616.405	1308.69	967.253	1286.68	976.27	1334.7	1648.62	2123.11	3586.73	1445.67	1167.95	1481.55	1317.48	1665.24	1333.51	2239.83	1114.1	1743.5	851.852	1108.31
ARHGEF11	9826	967.882	1331.62	970.463	1299.9	1206.25	1792.96	643.476	931.306	434.457	1082.33	850.915	3860.42	2602.98	1152.54	1234.61	3127.49	2308.46	2064.14	3032.26	2002.41	1909.35	1441.48	1029.95	1282.85	2429.57	1171.7	1637.96	1182.24	1488.35	2803.14	2009.17	2077.52	3783.37	1765.64	1432.92	999.128
ARHGEF12	23365	3984.21	5743.28	5305.94	4057.23	5363.3	7892.61	2260.37	7558.99	870.787	3057.69	2212.59	5209.59	6287.04	2704.6	3995.05	6139.86	2530.42	4624.94	3423.75	4453.21	4469.86	2575.46	3188.94	4342.45	3261.93	4759.33	2606.2	4528.26	4401.94	6127.44	3793.47	4281.49	6442.87	10466.3	4204.94	2602.52
ARHGEF15	22899	605.335	264.723	145.861	279.602	163.761	78.1787	399.818	171.998	257.803	81.1298	82.8848	175.647	246.097	70.2179	267.357	79.9461	92.3587	188.864	468.231	262.149	201.709	70.8419	296.659	95.2614	187.427	69.6765	308.979	228.95	161.65	214.199	166.164	136.143	76.8792	263.815	156.379	148.573
ARHGEF16	27237	476.32	2693.54	2231.19	2109.82	580.654	1097.94	1169.07	530.152	6.2422	1558.29	668.461	542.639	377.472	1239.71	967.255	1020.11	1048.6	1093.54	823.558	1902.8	781.68	717.659	4390.55	1246.7	2000	797.251	652.464	1095.16	933.01	749.977	652.077	717.539	1427.8	727.648	723.045	290.166
ARHGEF17	9828	1963.53	1574.04	1520.85	854.612	1051.27	732.818	848.853	1005.77	463.795	492.188	369.752	1961.39	1984.97	971.913	1520.87	1162.42	904.197	1704.68	1417.4	1699.16	1499.76	842.916	1614.06	1311.19	506.403	1102.03	1453.93	960.784	1653.88	2170.66	1632.29	976.26	1782.23	2471.53	1102.88	925.838
ARHGEF18	23370	2048.45	4457.4	2515.13	940.183	3466.36	3108.25	1560.99	3553.22	4911.36	1938.7	5148.55	2754.35	3748.35	3586.92	2254.53	3105.11	956.755	3056.57	2038.12	4343.61	3122.92	4685.83	3859.45	3820.71	1759.02	2981.4	1606.06	3352.36	3150.97	3875.26	2680.64	1905.04	5894.29	1802.42	3223.46	2080.52
ARHGEF19	128272	697.877	46.3122	193.995	219.103	61.9915	28.3505	103.904	53.4872	303.995	481.971	36.5985	488.757	58.2861	918.644	379.881	89.5396	659.778	587.082	389.541	496.529	216.422	989.22	67.9724	64.4846	237.485	105.226	222.716	29.4118	209.223	317.644	74.4332	54.2636	176.236	12.0086	377.366	92.7334
ARHGEF1	9138	2924.33	2162.95	2198.13	2077.67	2786	2019.76	2352.73	2447.3	26674.8	3647.24	3074.81	6106.92	2824.56	5121.55	1879.15	7997.8	1945.66	3248.55	3295.21	6359.34	6026.1	2592.92	2256.34	1574.5	962.747	5520.09	4069.01	2174.16	2948.06	3379.96	2631.9	3409.88	3589.87	1349.47	5089.71	2399.1
ARHGEF2	9181	1463.8	1114.35	2187.92	1097.7	1048.17	1383.16	644.691	1036.71	3747.82	561.298	928.418	5993.64	1280.44	3039.23	770.564	3154.14	1949.23	1172.83	1481.43	1720.26	1180.83	923.511	1204.49	616.023	232.829	811.944	1202.46	747.405	1402.43	4164.23	1076.14	1992.25	2873.52	425.181	1423.46	1107.32
ARHGEF33	100271715	8.1655	17.7244	9.2379	8.7205	4.6494	6.8729	18.2288	4.7195	2.4969	8.4135	2.1529	11.031	14.3402	19.8547	9.452	9.5935	6.1232	13.363	31.2805	9.9972	14.2383	3.5934	12.6728	0	0	9.9538	26.1404	8.0738	16.9903	11.244	3.6692	6.2984	5.8637	4.8785	7.8189	4.9857
ARHGEF3	50650	849.755	259.577	783.761	473.634	506.78	823.024	467.872	274.777	1084.27	534.856	223.358	432.753	472.303	198.063	564.42	214.255	367.904	420.045	516.618	341.016	1522.54	169.405	135.945	518.319	229.336	339.377	567.246	2122.26	452.913	303.589	340.716	330.426	465.836	379.022	504.115	414.309
ARHGEF35	445328	558.519	449.971	161.906	624.608	757.329	810.997	303.205	1202.94	73.0337	199.519	733.046	1679.68	293.281	559.806	866.884	1221.04	775.099	553.675	474.096	95.529	552.444	601.129	288.018	612.115	598.37	922.384	837.015	974.625	378.155	864.667	1032.63	163.76	1036.57	1155.46	813.992	217.874
ARHGEF37	389337	189.439	33.7336	306.795	116.092	37.7115	3.4364	163.451	14.1584	133.583	31.25	46.2863	571.065	83.2659	600.484	680.995	46.9017	81.6431	713.14	434.995	81.4589	345.99	261.807	39.7465	31.7538	199.069	239.365	153.183	58.2468	78.1553	530.719	192.897	145.833	254.092	419.927	249.794	322.074
ARHGEF38	54848	11.4317	31.4465	8.7517	86.1153	73.3566	68.7285	5.4686	42.4751	0	10.8173	24.2196	31.8201	13.8776	24.6973	68.4145	3.1978	16.3286	83.7416	32.7468	26.289	77.3612	30.8008	12.6728	26.3801	1.1641	29.8614	13.0702	53.6332	50	96.6987	17.2979	95.4457	22.4774	0	20.5761	4.4871
ARHGEF4	50649	287.969	33.1618	291.722	23.4364	21.697	10.3093	86.8905	17.8291	16.2297	34.8558	4.3057	43.6996	23.592	193.22	202.093	19.72	208.7	20.0445	169.599	26.6593	30.8495	13.347	36.8664	68.8813	71.0128	7.5838	8.8877	5.1903	5.8252	96.6987	3.6692	273.74	12.3789	397.411	10.2881	6.9799
ARHGEF5	7984	493.74	859.92	617.479	658.4	703.087	773.196	678.718	884.636	111.735	662.26	782.024	1092.91	292.818	612.106	820.975	887.934	550.58	721.604	612.414	359.9	589.938	780.288	285.714	851.979	632.13	752.222	511.306	572.664	368.932	752.788	1168.39	527.616	833.618	755.418	629.63	229.341
ARHGEF6	9459	537.289	222.985	288.319	179.316	495.932	132.302	99.043	179.339	1779.65	33.0529	92.0344	147.645	569.446	57.1429	185.439	228.646	44.3934	261.915	369.502	214.755	414.808	101.129	123.272	82.5598	67.5204	195.758	373.284	142.445	115.049	204.642	178.22	383.721	95.1218	412.421	327.161	504.549
ARHGEF7	8874	1218.84	1576.33	1116.32	2031.34	1093.12	990.55	738.265	1021.5	1596.13	575.721	622.713	1775.99	867.353	1328.33	879.037	1778.53	2101.8	738.53	1579.18	1384.43	943.996	618.583	1083.53	549.096	1281.72	1138.52	761.731	1374.28	1136.89	1297	1150.57	1264.53	1313.46	1519.47	834.156	1009.1
ARHGEF9	23229	551.987	395.083	357.36	51.7782	410.693	367.698	247.304	380.703	586.142	215.144	308.934	527.365	474.615	317.191	198.942	319.784	489.348	436.971	498.534	377.303	344.566	234.086	55.2995	247.191	284.051	344.117	357.077	394.464	344.175	367.118	340.191	330.911	395.798	1079.28	400.411	296.149
ARID1A	8289	1821.99	1270.44	1740.12	2768.22	1363.81	1095.36	474.556	1323.02	2699.13	840.144	1034.98	1655.49	1721.75	1492.49	1283.67	1386.8	1270.06	1203.12	1894.43	2592.98	2744.19	1008.21	658.986	670.249	1630.97	1035.19	1303.36	852.941	1260.68	1899.12	1917.97	1051.36	1426.5	3666.01	1620.16	1908.01
ARID1B	57492	1408.82	907.947	1221.34	1527.73	1586.47	790.378	492.784	849.502	1607.37	704.928	466.093	1948.24	1915.58	810.169	1039.72	1276.47	2183.95	1162.58	1428.64	1357.77	1490.27	959.446	407.258	394.724	1027.94	846.546	943.668	751.442	963.107	2306.71	1183.07	686.531	966.528	1619.66	845.268	1817.77
ARID2	196528	573.762	602.058	466.27	996.866	676.74	798.969	450.858	481.384	527.466	948.317	409.58	855.325	1067.19	687.651	782.716	986.001	513.331	1507.8	913.49	1200.78	1054.11	760.267	366.359	394.236	657.742	614.765	728.794	555.94	722.33	1112.04	817.193	717.539	630.345	798.949	687.654	359.466
ARID3A	1820	95.8084	76.6152	81.1961	143.889	73.8732	103.952	20.6593	45.097	93.0087	88.3413	34.4456	101.4	55.5106	66.8281	108.923	57.0282	117.872	83.2962	34.2131	1008.24	54.58	34.9076	135.369	91.3532	50.0582	45.503	51.7579	32.872	153.883	62.4044	42.4584	60.562	64.5004	65.2969	46.0905	68.3036
ARID3B	10620	179.096	76.6152	103.561	138.983	156.529	164.089	80.8142	69.7431	426.342	348.558	290.635	182.435	172.083	200.969	211.545	197.733	122.465	181.292	240.958	125.891	345.99	108.316	82.9493	246.702	133.877	105.226	232.126	151.672	219.417	184.964	198.139	105.136	113.038	315.602	193.827	64.8137
ARID3C	138715	0	0	0.4862	0.545	0	0	0	4.1951	0	0	4.8439	1.2728	1.3878	2.4213	0.9002	0	0	0.4454	0	4.0729	2.373	0	0	0	1.1641	1.422	3.1368	3.4602	2.4272	0.5622	0	0.969	0	5.2538	0.4115	0.4986
ARID4A	5926	490.474	371.641	502.735	376.073	422.575	397.766	126.994	633.456	546.817	498.798	298.17	529.062	603.215	376.755	345.223	755.224	426.585	609.8	378.788	679.441	746.085	359.343	99.0783	214.949	388.824	279.654	422.428	453.287	480.097	571.76	443.454	202.519	789.967	854.489	373.251	183.472
ARID4B	51742	974.486	1288.74	902.798	846.159	1194.68	851.091	590.005	870.079	1139.99	957.933	788.482	2567.21	1570.95	1410.16	862.95	2655.5	1263.22	1706.9	1594.33	1714.94	1592.92	1102.6	575.461	507.005	1272.19	873.819	1141.81	986.736	1031.42	2070.59	1427.86	1051.41	2424.97	2065.78	2044.86	606.257
ARID5A	10865	1146.98	985.706	481.828	432.212	604.933	1054.98	1091.9	474.567	4160.42	606.971	459.096	443.784	667.052	367.555	753.01	646.497	365.863	734.076	592.375	363.603	752.729	594.969	1827.77	1840.74	383.003	801.991	892.955	636.101	529.612	737.609	307.692	1042.15	394.82	178.628	768.313	696.996
ARID5B	84159	1912.9	263.007	584.903	1808.97	541.909	41.2371	96.6125	462.507	1616.73	554.688	271.798	2485.36	450.098	633.898	1053.67	144.436	1060.85	820.044	630.01	918.263	1904.6	486.653	66.2442	45.9209	98.9523	452.186	382.695	199.539	378.155	905.707	134.714	123.062	703.315	310.348	893.827	493.581
ARIH1	25820	1581.38	1487.71	956.363	1548.98	1053.86	1664.09	580.89	1449.4	1058.05	965.745	1234.12	1364.02	1647.74	1360.29	1115.79	2411.71	2398.78	1202.67	1211.63	1119.69	1276.7	1088.3	936.636	1198.83	629.802	1456.57	1129.26	1414.65	1303.4	1385.83	1569.39	1485.95	1089.99	1733	1662.96	768.79
ARIH2	10425	1088.68	883.934	1305.9	740.155	1125.55	600.438	610.664	819.061	2264.67	855.691	865.388	1047.91	1215.65	808.717	852.031	960.376	1276.18	628.918	1039.53	942.701	803.512	722.279	912.442	879.336	938.3	924.953	978.032	819.492	1106.76	722.396	927.27	869.67	1319.61	1408.68	786.625	1342.57
ARL10	285598	38.1056	6.2893	30.6308	10.9007	11.8817	1.7182	2.4305	7.8658	16.8539	3.6058	9.1496	30.123	25.4423	16.9492	13.0528	10.1265	2.0411	38.3073	42.522	18.5134	39.3925	8.7269	1.7281	0.4885	2.3283	9.4798	5.7509	24.7982	41.2621	10.1196	20.9671	4.3605	37.1366	19.8893	30.8642	29.914
ARL11	115761	53.8922	31.4465	40.8411	20.1662	60.9583	24.9141	18.2288	49.2921	343.945	4.8077	34.4456	2.9699	57.3609	5.8111	16.2034	14.9233	50.0064	23.1626	33.2356	28.1403	24.6796	27.7207	25.9217	25.403	5.8207	28.4394	36.5965	18.4544	12.1359	23.0503	17.822	12.1124	2.6061	8.6312	48.5597	73.7879
ARL13A	392509	0.5444	1.7153	0	0	0.5166	0	0	0.5244	1.8727	0	0.5382	0	0.4626	0.9685	0.9002	0.533	0.5103	0.4454	1.4663	0	0.4746	0	0	0	0	0.474	0	0.5767	0	0	1.0484	0.969	0.3258	1.5011	0.4115	0
ARL13B	200894	209.581	191.538	284.916	173.866	125.016	134.88	27.9508	148.925	119.226	192.308	210.441	195.588	204.927	117.191	90.0191	299.531	265.34	188.864	183.773	76.6454	145.23	116.016	53.5714	67.4157	252.619	270.174	239.969	205.306	177.185	273.23	175.075	141.957	152.455	322.357	117.695	317.088
ARL1	400	2213.94	1610.63	1776.59	2000.82	2991.61	1187.29	1737.2	1779.76	888.889	1992.79	1702.91	2043.7	2219.04	1969.49	1217.06	2692.05	1849.73	2484.19	2228.74	3349.81	1919.79	2096.51	1565.67	2919.39	2173.46	1061.26	1420.99	3021.91	2330.58	1758.01	1450.92	4649.22	972.392	2211.84	2063.79	1903.53
ARL14	80117	127.382	25.729	1356.51	80.1199	565.672	1000	59.5473	177.766	42.4469	845.553	837.998	100.127	691.569	348.668	942.05	204.129	11.2259	248.552	1030.79	283.625	342.193	447.125	322.005	140.694	6.9849	45.503	477.323	1054.79	481.068	653.279	116.367	650.678	429.677	2.6269	604.938	80.2692
ARL15	54622	484.486	202.401	218.792	264.886	140.514	178.694	77.1685	232.826	78.0275	140.625	173.305	183.708	155.892	227.119	343.423	94.3364	147.978	293.987	184.262	269.185	254.865	174.538	67.9724	105.52	250.291	207.133	212.783	270.473	183.495	212.512	239.549	140.019	156.364	526.879	220.988	139.599
ARL16	339231	489.385	657.519	699.161	619.703	596.151	874.57	1585.3	718.93	833.333	1636.42	1418.73	281.29	464.901	797.579	375.38	265.954	879.194	440.98	820.137	394.705	459.421	1150.92	1191.82	262.335	459.837	596.753	741.864	747.405	775.243	349.127	542	629.845	506.23	406.042	665.021	683.535
ARL17A	51326	62.9396	69.7141	62.8224	70.1022	52.8012	33.6426	24.9491	69.0823	124.501	106.388	163.003	49.4612	126.014	100.533	149.697	63.3812	176.951	55.6347	89.8387	95.1995	88.3816	121.571	22.5403	65.999	115.914	95.8834	63.5891	108.812	68.7087	85.3198	68.9608	70.1308	75.8335	66.0024	120.033	42.5427
ARL17B	641522	1.3881	2.8188	4.9447	5.5648	0.5424	0.9107	0	1.9979	12.7591	4.5373	2.2282	1.0904	3.0716	4.9346	2.4035	0	3.9597	1.4788	2.737	7.2276	1.794	8.7885	0	0.5178	5.681	1.1376	4.5798	2.0012	2.3301	5.2116	2.0391	1.2694	2.5246	5.8617	12.0206	0.6033
ARL2	402	1914.53	1295.6	1314.21	994.686	939.171	1262.03	3703.48	666.492	1982.77	2150.84	678.149	700.467	840.06	984.504	1226.06	1997.59	592.423	1729.18	736.559	606.128	499.763	1704.83	1762.67	2569.61	322.468	2023.94	1258.4	884.083	1229.13	1033.33	1852.44	1707.36	933.301	340.37	1211.93	3070.17
ARL2BP	23568	1397.39	1724.41	1323.45	2998.77	1600.41	1924.4	1559.17	2298.9	1281.52	892.428	1378.36	1438.27	1652.83	1339.95	1896.7	1622.37	696.007	892.65	1233.63	1187.08	1694.35	696.099	1732.14	2523.69	1625.15	2723.07	1926.02	1952.71	1840.29	692.633	1988.21	2633.24	1383.83	1436.53	1781.07	1436.87
ARL3	403	870.441	399.657	669.017	362.992	493.349	242.268	624.639	366.02	282.772	266.226	402.045	850.233	469.064	864.407	451.446	103.93	462.304	488.196	427.175	391.743	318.462	695.585	474.654	446.996	323.632	797.725	606.457	417.532	352.913	231.627	246.363	179.264	511.768	572.662	559.671	621.713
ARL4A	10124	936.309	246.998	369.515	505.246	327.522	126.289	240.62	201.363	452.559	804.688	180.84	205.346	198.913	242.615	330.82	96.4682	1858.91	306.904	388.074	202.166	219.744	407.598	296.083	291.158	863.795	228.937	282.839	215.686	233.495	200.144	532.04	247.577	108.478	176.377	227.572	658.108
ARL4C	10123	3119.76	2479.13	3098.58	257.801	1724.91	6548.11	2641.96	11259	2440.07	2781.85	4085.58	1896.48	1095.87	21070.7	3598.96	942.831	940.426	2420.04	3391.5	988.985	4441.39	6357.8	3158.41	316.561	591.385	2647.23	4295.91	6345.44	4730.1	3356.35	4236.4	8060.56	3723.1	210.902	7034.16	9046.99
ARL4D	379	732.172	46.8839	215.388	31.6119	48.56	19.7595	83.8523	104.877	46.1923	61.899	121.098	44.5482	47.6466	85.23	76.5163	21.8519	93.8895	52.1158	106.549	125.15	180.826	67.2485	31.106	145.579	247.963	96.2199	175.663	135.525	56.3107	59.0312	50.8452	107.074	65.4776	57.041	80.2469	554.905
ARL5A	26225	577.572	733.562	664.155	665.486	922.123	791.237	494.607	1269.01	543.695	718.75	735.199	914.722	846.999	1050.85	938.449	877.275	772.548	653.898	865.103	951.958	914.571	713.039	649.193	684.416	308.498	612.395	709.973	970.011	873.786	1148.58	829.249	806.686	480.821	673.984	941.564	694.503
ARL5B	221079	175.83	142.367	173.089	209.293	209.738	639.175	36.4575	612.48	39.9501	182.692	209.365	289.351	252.573	100.726	310.566	595.332	117.362	303.786	246.334	651.671	437.114	148.357	52.4194	205.667	194.412	225.145	143.772	296.425	154.854	287.285	144.673	150.678	353.123	408.293	346.091	94.2291
ARL5C	390790	0	0.5718	0	0	0	0	0	0	0.6242	0.601	0.5382	0	0.9252	0	0	0	0	0	0	0	0.4746	0	0	0	2.3283	0	1.0456	0	0	0	0	0	0	0	0.823	0
ARL6	84100	49.5373	63.4648	65.1513	53.4133	34.0953	26.6323	18.2288	32.5118	19.3508	61.2981	61.3563	73.3984	103.62	29.0557	24.3052	75.1493	44.3934	53.8976	68.915	31.1025	46.5116	41.5811	19.0092	32.2423	30.2678	95.7459	57.5088	53.0565	34.9515	97.261	41.9342	31.9767	61.5685	71.6765	42.7984	85.2549
ARL6IP1	23204	3142.62	5827.9	6088.25	14581.8	4107.45	5960.48	3375.36	7956.48	2561.8	5889.42	4876.21	10396.3	5355.38	7707.02	5300.78	7430.72	6896.29	2612.47	4260.51	3614.18	4660.65	4252.57	2924.54	2522.23	7982.54	4898.68	5528.17	7831.03	4056.8	6979.18	4730.18	4145.83	6800.55	5238.01	4527.98	6367.69
ARL6IP4	51329	3253.67	3847.34	1955.51	2285.87	3080.46	3035.22	12619.8	2209.75	6308.99	4753.61	4409.04	2296.14	2588.64	3655.21	1618.99	1877.67	1904.32	2983.96	2094.33	2493.75	1932.61	5673.51	6240.78	3400.59	3197.9	2410.24	2799.63	3044.98	2955.83	2046.42	2207.31	3359.5	1551.27	1760.77	2034.57	2962.98
ARL6IP5	10550	4237.89	2092.05	4414.73	1742.47	2454.35	1885.74	1374.45	2077.61	4516.23	1126.8	2303.55	2594.82	2383.72	1268.28	1285.47	979.073	1445.08	2090.42	1740.96	1436.64	1923.59	1241.79	1253.46	1063.51	1080.33	2734.45	1590.9	2511.53	1261.16	1437.55	1118.07	3152.62	2651.03	2599.12	2232.92	3760.69
ARL6IP6	151188	371.257	275.014	381.184	321.57	321.839	146.048	49.2177	442.056	199.75	146.034	390.204	319.05	328.9	388.378	179.588	422.115	577.625	310.913	221.408	292.141	302.326	144.764	95.6221	108.451	67.5204	435.123	258.79	191.465	315.534	482.369	288.298	447.674	247.903	266.442	360.082	427.77
ARL8A	127829	1345.67	2181.25	1258.78	1124.95	1288.91	2243.99	2550.81	1314.63	1232.21	2170.67	2123.25	2967.76	1521.45	2644.55	1159.9	2600.91	1335.88	1250.33	1852.88	1238.54	1442.81	2603.7	1532.83	1810.94	2534.34	1498.28	1590.9	1774.51	1394.66	2411.28	1494.43	1673.45	3927.03	1206.87	3081.89	1480.24
ARL8B	55207	1795.86	1189.25	2076.58	995.231	1362.26	1037.8	823.941	2299.95	1397.63	777.043	1553.28	1200.68	1029.26	767.07	865.984	864.483	1104.73	1451.67	1008.31	1436.27	1021.36	703.799	666.475	1127.02	1072.18	1052.26	1048.75	1021.34	1119.9	1442.61	1082.95	1011.63	1385.78	1514.59	1066.26	2054.59
ARL9	132946	22.319	2.8588	6.8069	17.4411	8.2655	5.1546	27.3432	7.8658	0.6242	1.2019	0.5382	6.7883	124.436	74.092	13.953	6.9287	1.5308	75.7238	14.174	15.181	78.3104	13.347	16.129	0	0	1.896	52.2807	4.0369	11.165	84.3303	3.6692	30.0388	59.614	0.7505	4.1152	26.424
ARMC10	83787	537.164	537.456	547.568	782.864	680.346	1883.38	3310.91	761.662	460.849	1441.09	927.304	622.261	638.233	500.78	763.853	520.129	1026.18	713.604	943.475	427.315	946.422	663.763	490.645	563.835	370.757	773.935	854.513	603.362	434.685	796.297	790.009	694.724	572.587	663.563	869.304	713.648
ARMC1	55156	549.809	552.887	456.546	886.769	791.941	554.983	195.048	631.358	275.281	443.51	277.718	456.088	806.754	695.884	778.215	564.419	484.245	769.711	219.941	615.755	376.365	401.437	226.382	377.137	634.459	618.083	319.435	461.938	438.835	435.144	555.628	565.891	745.338	652.219	643.621	596.784
ARMC2	84071	39.1943	15.4374	23.824	17.9861	36.6783	12.0275	17.6211	14.1584	47.4407	34.8558	11.8407	39.4569	28.6805	36.8039	28.8061	12.2584	80.1123	43.2071	46.9208	22.9566	23.7304	27.2074	14.4009	21.0064	22.1187	11.8497	50.7123	18.4544	40.7767	77.0217	16.2495	14.5349	18.2425	23.2667	25.9259	31.9083
ARMC3	219681	19.5972	2.287	4.862	11.4457	14.9813	4.2955	23.6974	3.6707	0	184.495	2.1529	26.3046	12.9525	0	0	1.5989	2.5513	329.176	24.4379	107.007	35.121	10.7803	6.3364	0.977	0	5.6879	242.583	10.9573	76.699	24.1747	0.5242	16.4729	33.2275	0	19.3416	23.9312
ARMC4	55130	4.8993	2.8588	2.9172	1.6351	8.7821	0.8591	20.0516	4.7195	1.8727	0	14.5318	4.6669	6.4762	54.2373	26.1055	26.1157	1.5308	32.9621	8.7977	1.4811	0.9492	9.2402	15.553	1.4656	3.4924	7.1098	3.1368	0.5767	0.4854	15.1795	0.5242	19.3798	50.4927	36.0259	2.8807	134.613
ARMC5	79798	373.979	437.965	332.077	424.036	319.256	201.031	1578	255.375	766.542	592.548	363.832	323.717	416.792	454.721	288.511	325.114	281.669	254.788	320.137	304.36	411.96	434.292	762.097	355.154	325.96	240.313	383.218	454.441	586.408	486.867	441.358	399.709	240.085	293.836	314.815	372.429
ARMC6	93436	566.685	634.631	686.034	424.581	688.617	509.399	857.961	651.285	813.982	1547.48	1368.61	815.443	769.261	402.886	882.62	629.916	519.454	598.178	727.219	471.713	820.071	734.6	991.342	922.325	1317.79	676.796	603.309	701.217	770.864	678.561	752.043	818.304	433.521	495.307	675.095	1012.57
ARMC7	79637	526.946	637.507	284.916	483.99	820.354	442.44	1020.2	456.214	621.099	863.582	631.862	437.42	352.492	570.46	495.105	303.795	486.797	420.045	498.534	283.625	522.069	383.984	621.544	684.416	441.211	414.741	463.207	724.337	557.767	472.812	700.301	719.961	674.973	477.343	418.93	310.607
ARMC8	25852	717.474	769.011	651.513	870.418	774.377	548.11	267.963	616.675	622.347	457.332	639.935	505.728	760.032	319.128	609.88	789.867	782.243	558.575	585.044	398.408	712.862	480.493	383.641	630.191	878.929	679.701	536.4	498.847	304.854	638.099	426.156	624.031	542.389	750.164	392.593	881.466
ARMC9	80210	216.113	321.327	258.174	161.33	267.08	251.718	311.104	298.374	39.3258	276.442	413.348	356.81	300.22	336.077	429.391	338.438	188.289	359.911	339.687	177.728	299.952	230.493	339.862	70.3468	13.9697	224.671	266.632	246.828	394.66	581.879	304.023	415.698	316.638	127.592	423.457	335.535
ARMCX1	51309	317.365	97.7702	240.671	45.7828	528.477	409.794	96.0049	123.755	153.558	49.8798	164.693	648.282	467.677	655.69	56.262	429.044	102.564	501.559	117.302	364.714	115.805	456.879	76.0369	136.297	23.2829	48.821	227.944	371.396	427.185	465.503	297.733	500.485	358.01	357.632	465.844	377.913
ARMCX2	9823	945.563	962.836	704.51	39.7874	1033.19	822.165	391.919	598.322	397.004	61.899	59.7417	1072.97	966.347	888.136	646.787	737.636	723.562	868.151	836.266	1352.22	842.905	842.916	587.558	437.225	60.5355	63.5146	183.505	674.74	425.728	724.116	512.122	1525.68	564.867	212.778	743.21	356.475
ARMCX3	51566	1568.86	2498.57	1623.43	159.15	1591.11	1891.75	940.605	1434.19	671.66	624.399	1011.84	1719.56	1390.08	1650.36	1806.23	1838.23	1778.8	1502.45	1682.31	2760.71	1515.42	1636.55	1410.71	1798.73	1485.45	1508.71	1064.96	2104.38	1758.74	1308.81	1312.54	2179.26	1513.8	1182.1	1715.23	1243.43
ARMCX5	64860	297.224	276.73	475.507	238.18	326.488	487.973	229.075	246.46	233.458	195.312	227.664	357.658	389.962	388.378	337.122	522.314	300.548	354.566	437.439	484.68	352.159	420.945	190.668	318.515	267.753	304.301	336.165	380.046	327.67	23.0503	390.512	319.767	410.457	478.094	315.638	186.963
ARMCX6	54470	351.66	235.563	237.268	20.1662	221.103	260.309	221.783	146.303	218.477	154.447	139.397	291.472	156.817	390.315	168.336	232.377	221.967	292.205	260.508	266.222	338.396	364.476	166.475	327.308	76.8335	180.116	183.505	280.277	237.864	182.716	210.719	272.287	216.304	127.967	239.095	256.762
ARMS2	387715	0.5444	0	0	1.0901	2.0664	0	1.8229	0	0	0.601	0.5382	0.4243	0.4626	2.9056	0	2.6649	0	1.7817	1.4663	0.3703	0	0	0.576	1.9541	0	1.422	0	0.5767	0	0	1.0484	2.4225	0	1.1258	0	0.4986
ARNT2	9915	502.994	273.299	246.505	8.1755	2512.2	259.45	465.441	264.814	342.697	603.365	400.969	784.472	1762.92	1907.51	2662.32	2661.67	184.717	1937.19	2297.65	172.915	1805.89	662.731	490.783	861.749	59.3714	1014.34	868.383	554.787	746.116	2427.03	2925.44	2625	1127.13	682.616	699.588	317.088
ARNT	405	1010.89	1789.02	898.505	885.679	1172.16	1916.67	893.21	1165.18	872.035	1141.23	775.565	4437	2066.38	1808.23	1235.96	2122.3	1279.76	1855.68	2134.9	1702.12	2270.53	1526.18	827.765	788.471	2273.57	1203.93	1336.82	1048.44	1306.8	2154.92	1722.45	2486.43	2971.58	989.962	1436.63	861.523
ARNTL2	56938	171.475	53.1732	518.78	64.3139	427.225	104.811	10.3296	128.474	33.7079	41.4663	128.095	87.8235	276.165	134.14	683.695	71.9515	128.078	531.403	467.742	355.827	119.127	225.359	35.1382	53.2487	19.7905	453.608	97.765	92.8489	223.786	576.257	226.969	303.295	146.592	168.871	253.498	769.288
ARNTL	406	273.816	182.962	137.109	148.249	137.414	139.175	30.3813	339.801	289.638	28.8462	213.132	204.073	242.396	72.155	298.863	191.338	195.433	114.477	136.852	107.378	235.88	139.117	263.825	155.838	685.681	253.111	168.344	97.4625	91.2621	92.7633	256.323	181.202	125.743	216.531	172.428	267.232
ARPC1A	10552	2880.61	3078.33	8429.64	3831.75	3242.42	1912.65	3398.45	3678.19	1246.17	4232.57	3522.16	1671.74	2428.71	1539.18	3239.91	3310.47	4134.35	2319.07	2579.18	2049.91	2204.67	2454.31	2891.71	3904.04	3878.93	2473.3	2473.13	3657.44	1717.47	2764.91	3297.93	4245.15	2006.66	1780.54	2951.97	4725.74
ARPC1B	10095	6166.75	5050.89	14361.2	5619.13	5489.59	1870.86	4198.69	8263.6	11492.3	3118.39	6122.62	2563.3	3825.94	2108.76	3970.18	8911.69	3966.68	4369.13	3715.05	4137.26	2656.26	3687.89	5585.25	9002.65	5071.01	7890.96	4264.29	2386.97	2637.87	4703.38	7214.45	7176.36	3697.39	1956.39	8300.29	14072.7
ARPC2	10109	6561.79	5543.74	5381.79	4077.94	5184.04	3500	4295.91	7584.69	7972.53	2316.11	5646.93	4590.58	3707.64	3618.4	3286.6	4955.59	4242.89	3570.6	3880.25	4402.85	3032.27	3916.84	5678	6340.5	2788.13	5615.83	3953.99	3459.63	4128.64	5276.27	3726.9	5901.16	4162.88	2723.33	6244.44	11364.3
ARPC3	10094	5425.69	5234.99	3616.87	4161.33	4931.94	2575.6	7174.84	3852.65	7695.38	3922.48	6017.22	2386.51	2849.54	3597.58	1606.39	4154	3084.58	3950.11	3176.93	5366.66	2667.77	5106.78	6485.02	6165.61	3608.85	3223.13	3212.13	4016.15	3888.84	2601.31	3173.37	5582.85	2037.3	2056.1	4816.87	5403.47
ARPC4	10093	3706.19	2842.58	5022.27	2991.84	2951.89	2185.31	4553.22	3409.14	8304.96	3185.79	2472.19	3008.04	2093.63	1913.6	1641.75	2210	2684.25	1897.3	2301.23	2933.56	1887.65	2673.51	3745.63	2652.55	2164.71	2742.44	2664.9	2292.76	2563.48	3582.59	2209.87	2759.88	3599.56	2017.27	2721.26	6271.93
ARPC5	10092	4621.67	5547.17	4310.68	3805.42	5224.33	4311.86	4816.04	3653.91	5754.06	4075.72	4178.15	8977.51	6929.11	5315.74	2208.17	9548.22	5529.79	3850.78	7231.67	5077.85	4598.48	4546.71	4165.32	4559.84	5682.19	4250.74	4395.24	4836.22	3294.66	7695.42	5509.11	6290.21	10062.4	2616.76	6222.22	7234.2
ARPC5L	81873	915.623	778.159	895.101	483.445	715.485	831.615	1584.08	615.627	2009.36	655.048	1395.05	969.453	708.685	620.339	390.683	714.185	1022.58	830.735	845.552	1407.39	429.046	1802.87	1578.34	814.362	1161.82	696.291	630.506	589.389	473.786	476.185	380.029	533.43	844.694	840.604	927.16	2121.4
ARPM1	84517	40.8274	63.4648	27.7136	30.5219	43.9106	33.5052	49.2177	30.4143	5.618	30.649	33.3692	25.0318	71.7012	23.2446	38.7082	76.2152	34.6983	33.853	60.1173	71.8319	71.1913	50.8214	157.834	59.5994	60.5355	42.6591	26.6632	65.1672	45.1456	62.4044	27.2572	41.6667	26.7123	10.5076	37.037	46.3667
ARPP19	10776	2894.94	3615.21	2341.56	4138.98	4447.37	4564.43	1581.04	3424.75	1783.4	2855.77	2695.37	2219.77	4123.97	3297.82	3240.69	4686.97	3685.67	2416.48	2601.66	2140.15	3548.17	2115.5	2629.61	3135.32	2220.02	4132.72	2558.1	3472.32	3072.82	3347.35	4057.14	5397.29	3036.4	4062.29	3442.8	2176.74
ARPP21	10777	0	0.5718	1.4586	0	0.5166	0	0	4.7195	0	0	1.6146	0.4243	0.9252	0	0	0	0	0.4454	0.9775	1.1108	0	0	0	0	1.1641	2.3699	0.5228	3.4602	0	0	2.0967	0	0.3258	0	0	10.4699
ARR3	407	0.5444	0.5718	0.4862	0	0	0	0	0	0	0	0	0	0	0.9685	0	0	0	0.4454	0	0	0	0	0	0	0	0	0	0	0	0	0	0	0.3258	0.7505	0.4115	0
ARRB1	408	728.361	146.369	755.561	359.722	239.184	154.639	292.876	302.045	401.998	561.899	129.171	262.622	420.493	125.424	1077.53	165.222	602.628	260.134	332.845	197.723	166.588	444.558	156.682	788.471	174.622	127.503	440.727	130.911	373.301	302.465	501.638	103.198	292.206	90.44	288.889	157.048
ARRB2	409	1100.71	819.897	591.71	879.139	789.875	780.069	1111.35	628.736	2705.99	2021.63	742.196	339.839	932.115	1873.12	1124.79	458.89	499.043	472.606	1297.17	1028.23	736.118	894.764	938.364	762.579	925.495	865.031	1169	813.726	718.932	620.109	828.725	424.903	833.293	8258.94	669.959	856.039
ARRDC1	92714	1181.82	1897.08	1543.21	1081.35	1065.22	1591.07	2785.36	1529.1	2162.92	2362.98	2031.22	1483.67	823.87	1234.38	834.927	1084.6	1404.77	976.392	929.13	1155.98	1065.97	4107.8	1952.19	1057.16	655.413	1687.4	1032.54	1773.36	1016.99	742.107	566.636	567.83	2175.1	752.791	1225.93	1255.89
ARRDC2	27106	4850.84	9415.67	5145.98	506.336	5335.92	5113.4	6752.54	1804.93	4374.53	5347.36	12146.4	2350.87	4071.7	9077.97	13024.9	2087.66	710.295	7964.81	2668.13	773.489	11285.2	9112.94	8892.28	4802.64	2135.04	3729.35	8000.52	10216.8	1485.44	4584.76	15569.1	1810.56	6672.2	9781.41	10498.8	3216.75
ARRDC3	57561	1253.13	536.878	2379.48	772.312	771.794	1247.42	366.398	1416.36	994.382	1314.9	1057.59	1231.65	542.616	1733.17	866.434	1999.72	1992.09	1238.31	667.644	1368.14	688.182	829.055	666.475	968.735	1888.24	1184.97	908.639	989.043	898.058	1371.21	698.205	726.26	1142.76	5902.62	1494.24	448.71
ARRDC4	91947	391.399	155.517	521.211	724.894	283.611	186.426	249.734	205.034	409.488	125	492.465	353.84	252.111	194.673	81.0172	336.306	936.854	304.677	125.611	127.002	334.124	59.5483	48.3871	39.0816	1844	230.833	335.12	259.516	323.301	312.584	164.592	207.364	291.555	1545.36	341.152	220.865
ARRDC5	645432	6.5324	0	6.3207	1.6351	6.7157	3.4364	7.8991	1.5732	90.5119	0.601	0.5382	1.2728	6.4762	2.4213	1.3503	1.5989	0	2.6726	5.3763	1.1108	4.2715	0.5133	2.8802	2.9311	1.1641	1.422	7.3193	1.7301	0.9709	0.5622	3.6692	2.4225	1.303	0.7505	5.7613	5.4842
ARSA	410	1234.62	372.784	1436.73	941.273	392.613	1457.9	600.942	1008.91	1748.44	710.938	1004.31	634.281	321.499	1040.19	730.055	539.902	691.415	925.612	986.803	874.202	970.574	1000	560.484	2917.93	919.674	560.256	949.418	559.4	1105.34	667.334	766.872	884.69	737.845	1346.09	1389.3	1140.72
ARSB	411	385.411	216.695	261.578	412.045	229.369	232.818	182.288	336.654	221.598	361.178	271.798	126.008	241.471	415.981	313.717	239.838	136.242	540.757	311.339	508.748	559.089	190.452	159.562	234.001	153.667	309.515	376.944	227.22	358.252	385.671	323.418	328.973	138.774	176.752	294.239	401.346
ARSD	414	1725.64	2790.74	3317.37	4370.62	1731.11	2064.43	2457.24	4378.08	446.317	841.346	1594.19	1817.14	2036.31	3330.27	2555.64	3703.1	2302.84	2661.92	1058.65	1204.11	1221.64	3514.89	2339.29	1795.8	972.061	2727.34	2129.39	1548.44	2048.54	2352.82	1811.56	2062.98	2138.94	2695.19	1141.56	1136.73
ARSE	415	426.783	2492.28	467.728	342.281	1341.6	3629.73	3775.79	2888.83	0	865.986	1641.55	12.728	1535.33	592.736	631.034	647.563	475.061	1399.11	444.77	396.557	893.688	601.643	4112.9	2680.51	71.0128	471.146	1313.82	2549.6	2794.66	78.1461	1604.51	2783.91	165.486	562.905	547.325	330.051
ARSF	416	0.5444	0.5718	0.9724	1.0901	0.5166	0	0.6076	4.7195	0	0.601	5.9203	13.5766	0	0	0	9.5935	0	0.8909	8.7977	2.2216	0.4746	0	0.576	1.4656	59.3714	0.948	0	0	0.9709	8.9952	0	0.969	0.3258	0	2.0576	0
ARSG	22901	91.4535	22.2985	44.7308	16.896	34.0953	7.732	11.5449	38.8044	110.487	9.6154	20.9903	70.8528	34.6941	65.3753	11.2524	67.1547	86.7458	31.6258	49.8534	44.8024	74.5135	13.347	51.2673	5.8622	12.8056	17.5376	22.4807	16.1476	37.8641	27.5479	19.9188	109.012	60.2655	18.0129	32.0988	31.9083
ARSH	347527	2.1775	0	0.4862	0.545	0.5166	0	0	0	0	0.601	0	0.4243	0	1.937	0.4501	0	0.5103	2.2272	8.7977	0	0	1.0267	0	0.4885	0	0	0	0	0	3.3732	0	0	0.6515	0	2.0576	0
ARSI	340075	97.9858	154.946	100.644	3.8152	80.5889	740.55	17.0135	742.003	28.7141	2.4038	3484.39	25.8804	45.7962	121.55	993.361	201.464	16.3286	85.078	11.2414	32.5835	47.9355	92.9158	198.733	2830.48	10.4773	182.96	28.2316	11.534	860.68	62.9666	41.41	96.8992	57.0079	4.128	167.078	56.8366
ARSJ	79642	253.13	97.1984	180.868	811.01	197.856	373.711	82.6371	518.091	19.975	387.019	221.744	81.8838	15.2654	584.988	614.831	15.9892	39.2907	500.668	380.254	119.967	416.232	329.569	97.9263	228.627	131.548	152.151	296.432	955.017	455.825	29.2345	321.321	91.0853	62.8716	150.858	220.576	618.721
ARSK	153642	139.358	171.527	116.689	159.695	113.134	18.9003	38.2804	102.255	102.996	224.159	151.238	158.676	117.96	190.799	163.385	80.479	77.5609	285.969	126.1	146.626	220.218	110.37	48.3871	85.0024	128.056	177.272	213.305	149.942	145.631	190.024	86.4893	142.442	135.842	177.127	85.1852	164.527
ART1	417	1.0887	0	0	0	0	0	0	0	0	0	0	0	0.4626	0	0.9002	0	0	0.8909	1.4663	0	0	0	0	0	0	0	0	0	0	1.6866	0	0	0	0	0	0
ART3	419	1.0887	0.5718	4.862	2.1801	1.0332	0	0.6076	0	1.8727	0	0	5.5155	0.9252	8.2324	0	0	12.2465	0.4454	1.955	1.4811	1.4238	0	0	0.977	0	0	1.5684	0	0.9709	0	1.0484	0	0.3258	0	0.823	0.9971
ART4	420	203.593	573.471	48.6204	0.545	685.006	2.5773	27.3432	326.691	81.1486	63.7019	49.5156	53.0335	1020.47	28.0872	126.927	174.815	9.6951	484.187	144.184	613.533	574.276	571.869	82.9493	204.69	64.0279	928.072	218.534	461.938	349.029	328.888	279.387	64.9225	460.298	1021.11	115.226	49.8567
ART5	116969	8.7099	1.7153	9.7241	1.6351	2.583	0	8.5068	4.7195	1.2484	0	0.5382	0.4243	0.9252	3.8741	2.7006	0	2.5513	1.3363	0.9775	0	2.373	0.5133	1.7281	0.4885	1.1641	0.948	5.2281	3.4602	0	1.6866	1.0484	12.5969	0.3258	1.5011	1.2346	0.4986
ARTN	9048	41.9162	2.287	6.8069	85.5702	20.6638	17.1821	83.2447	2.6219	7.4906	81.1298	2.1529	23.759	3.7007	100.726	60.3128	9.0606	91.3382	26.7261	90.4203	14.8107	14.7129	3.5934	10.9447	71.8124	8.149	1.422	41.8246	21.3379	18.932	52.2848	27.7814	28.5853	9.447	3.7527	60.0823	83.2606
ARV1	64801	228.089	517.438	371.946	241.995	428.258	329.038	420.477	324.594	308.365	418.269	531.216	1117.1	798.427	447.942	401.485	1831.3	425.565	494.432	474.585	525.039	376.839	369.096	502.304	679.043	1416.76	305.723	427.134	511.534	382.039	634.726	463.897	632.752	673.996	458.58	672.428	252.275
ARVCF	421	483.941	498.571	427.373	255.621	468.552	1154.64	1354.4	489.25	250.312	1266.23	523.681	661.434	234.07	1653.75	874.086	112.99	379.13	291.76	1255.62	348.422	469.388	488.193	631.912	934.538	580.908	574.002	957.783	497.693	972.816	654.403	503.735	381.298	1465.92	499.859	704.115	308.613
ARX	170302	29.9401	25.1572	40.8411	3.8152	0.5166	0.8591	0	0.5244	5.618	0	0.5382	0	2.3129	0.4843	0	1.0659	1.0205	0	2.4438	1.1108	0	0	19.5853	0.977	0	0	0	0.5767	0.9709	0	0	58.624	0	0	0	0.4986
AS3MT	57412	154.6	69.7541	89.9477	87.2053	220.07	149.484	408.932	308.862	131.529	116.587	207.75	380.993	1057.48	517.191	113.424	396	174.002	240.98	273.216	413.219	355.482	762.834	877.88	1922.33	1341.09	398.151	727.748	231.834	187.379	183.278	217.534	328.973	192.85	416.549	80.6584	119.157
ASAH1	427	3267.83	6169.81	3384.95	1146.75	5091.05	2672.68	1627.83	3120.08	1724.72	1623.8	2293.33	2808.66	2315.72	2788.38	4036.91	4306.96	1931.88	5190.62	2275.66	2554.48	1327.01	3913.76	2539.17	4681.49	1098.95	2263.3	1643.71	3192.04	2686.41	2894.78	2201.02	3249.52	3978.17	3538.79	2386.83	2845.32
ASAH2	56624	10.8873	1.1435	1.4586	1.6351	1.5498	2.5773	0	2.6219	0	7.8125	6.4586	2.5456	5.5511	2.9056	4.501	4.2638	16.3286	8.4633	11.7302	9.9972	6.1699	3.5934	1.1521	4.8852	6.9849	11.3758	0.5228	8.0738	2.4272	5.622	3.6692	12.1124	3.2576	41.2797	3.7037	10.4699
ASAH2B	653308	1.0887	0	7.7793	5.4503	11.8817	3.4364	0	2.0975	0.6242	0	12.3789	13.1523	9.2518	10.1695	5.8512	12.7914	1.5308	47.6615	1.4663	2.9621	18.9843	0.5133	0	2.4426	4.6566	3.7919	4.7053	2.8835	12.6214	2.2488	16.7737	0.969	26.3865	24.7678	20.5761	3.9885
ASAM	79827	109.418	14.2939	144.403	9.2656	21.697	0	0	7.8658	46.1923	0	0	7.2126	21.2791	0	21.6046	14.3903	0	8.9087	9.7752	5.1837	42.7148	3.0801	0	1.4656	0	28.4394	16.7298	1.7301	6.3107	2.811	2.6209	13.0814	6.1894	0.7505	37.8601	1341.14
ASAP1	50807	1504.63	1624.93	905.312	2425.94	1519.82	376.289	225.429	1676.46	755.93	388.221	1347.15	1518.88	1995.61	744.794	1836.39	2673.93	1143.51	2129.18	1695.99	2614.83	964.404	1183.78	577.189	702.491	308.498	3073.82	761.208	506.344	1367.48	2638.98	1499.67	1868.22	3507.13	918.285	3779.01	1381.03
ASAP1IT1	29065	0	0	0	0	0	0	0	0	0.6242	0	0	0	0	0	0	0	0	0	0	0	0	0	0	0	0	0	0	0	0	0	0	0	0	0	0	0
ASAP2	8853	1654.33	451.687	1716.79	632.239	1120.5	731.1	291.053	1341.37	144.819	460.938	693.757	1396.69	241.008	1191.28	1400.25	1657.02	974.614	1224.5	1674	1214.85	1137.16	572.895	439.516	1196.87	186.263	782.083	594.955	420.415	885.437	1644.44	831.346	794.089	1036.57	818.088	1385.19	819.644
ASAP3	55616	383.778	47.4557	501.276	471.999	78.0059	35.2234	119.095	79.182	136.08	14.4231	50.0538	78.4896	108.246	52.7845	353.325	23.9838	71.948	145.212	199.902	129.594	153.298	98.0493	37.4424	247.679	636.787	209.977	159.456	50.173	153.883	83.7681	60.8046	220.446	41.6972	192.138	152.263	116.166
ASB10	136371	0	0	0	0	0	0	0.6076	0	0	0	0	0	0	0	0	0	0	0	0	0	0	0	0	0	0	0	0	0	0	0.5622	0	0	0	0	0.4115	0
ASB11	140456	0	0	0	0.545	0	0	0	0	0	0	0	0	0.4626	0	0	0	0	0	0	0	0	0	0	0	0	0	0	0	0	0	0	0	0	0	0	0
ASB12	142689	2.6293	3.4305	2.8589	0	12.9149	3.4364	3.0381	1.5732	6.2422	8.4135	1.0764	6.3428	8.3266	8.2324	0	3.7308	3.0616	5.3452	1.0606	3.9211	0	11.807	3.4562	0.977	4.6566	5.6879	5.7509	2.526	7.767	0.714	1.5725	0.969	3.453	2.6269	0	0
ASB13	79754	831.247	538.022	380.698	494.345	795.557	410.653	1053.02	443.629	942.572	579.327	686.76	628.341	1673.18	633.414	800.27	562.287	355.658	1221.83	841.642	273.257	653.536	654.518	656.106	630.679	2090.8	1552.79	699.516	852.941	507.767	516.664	507.404	630.33	1129.08	7285.86	570.37	425.776
ASB14	142686	5.4437	5.729	8.2655	5.9954	5.6826	0	6.0763	8.9145	11.8602	4.8077	6.4586	4.6669	6.4762	7.7482	8.5518	3.7308	8.6746	6.6815	8.7977	3.7027	8.0683	4.1068	3.4562	2.4426	5.8207	10.9018	8.8877	12.7047	4.8544	8.433	3.6692	5.814	11.4016	4.8785	9.465	2.9914
ASB15	142685	0	0	0	0	0	0	0	0	0	0	0	0	2.3129	0	0	0	0	0	0	0	0	0	0	0	1.1641	0	0	0	0	0	0	0	0	0.7505	0	0
ASB1	51665	364.801	306.192	491.708	178.935	542.529	370.369	404.812	651.489	511.523	297.158	271.222	545.702	523.52	628.673	846.27	741.089	600.72	578.04	545.44	631.195	840.408	584.481	360.248	385.168	270.652	393.71	386.428	664.262	560.228	983.606	507.137	460.455	703.269	651.746	525.169	1825.52
ASB16	92591	14.5346	28.4677	15.5585	17.5174	32.0961	12.9553	4.8732	7.4253	28.2584	20.7031	36.2002	64.0221	42.6229	53.6707	25.822	38.001	25.6921	23.461	53.1281	18.3875	40.0854	8.8347	8.7154	7.2985	24.5751	16.4285	20.4836	11.7186	22.9466	24.8493	22.136	17.563	35.2016	84.1092	11.358	5.5042
ASB17	127247	0	0	0	0	0	0	0	0	0	0	0	0	0	0	0	0	0	0.4454	0.4888	0	0	0	0	0	0	0	0	0	0	0	0	0	0	0	0	0
ASB18	401036	0	0	0.4862	0	0	0	0	3.1463	0	0	0	0	0	0	0	0	0	0	0	0	0	0.5133	0	2.9311	0	0	0	0	2.4272	0	0	0	0	0	1.2346	0
ASB2	51676	169.298	61.1778	44.2446	37.6073	113.651	11.1684	47.3948	21.4997	900.125	18.6298	11.8407	8.4854	103.62	1.937	36.0077	12.2584	4.0822	31.6258	65.0049	20.3647	37.4941	5.1335	12.6728	16.6097	5.8207	3.3179	105.607	40.3691	14.5631	16.8661	18.8704	15.9884	4.5606	30.0216	52.2634	33.404
ASB3	51130	282.526	196.684	273.247	205.478	187.008	68.7285	61.3702	157.315	354.557	243.99	230.355	261.048	222.042	204.358	276.359	197.2	305.651	259.688	284.457	203.277	297.579	244.353	169.931	183.195	176.95	257.021	184.028	231.257	289.888	220.945	234.832	212.805	186.986	154.236	253.498	383.398
ASB4	51666	2.1775	0.5718	2.9172	8.7205	0	0	0	1.0488	0	0.601	0	0	0.4626	1.937	0.9002	0	6.6335	0	0	0.3703	2.373	0	0	0	3.4924	3.7919	1.0456	0.5767	0	0	1.0484	1.938	0.3258	6.3796	1.2346	0
ASB5	140458	0.5444	0	0	0	0.5166	0	0	2.0975	1.2484	0	0	0	0	0.9685	0.4501	0	0	1.3363	0	0.3703	0.9492	0	0	1.4656	0	0.474	0.5228	0	2.9126	0	0	1.4535	0	14.6355	0	1.9943
ASB6	140459	713.304	729.297	826.168	359.46	687.294	599.751	940.258	498.254	1442.25	631.004	921.652	778.511	682.308	523.937	344.737	564.302	1385.11	615.751	554.198	687.305	416.711	1305.53	935.069	575.31	598.847	687.162	511.002	408.893	518.961	418.396	476.063	410.63	663.644	616.572	495.819	1005.05
ASB7	140460	437.126	415.094	211.985	488.35	478.368	491.409	318.396	306.765	371.411	474.159	317.007	329.656	465.364	399.516	582.424	543.1	448.527	329.176	412.512	281.033	432.843	364.99	311.636	380.557	321.304	363.55	348.19	390.427	361.165	371.615	475.429	373.062	321.199	335.116	505.761	234.326
ASB8	140461	686.99	897.656	430.291	537.948	783.676	610.825	655.02	485.055	666.667	620.192	420.344	670.344	793.801	687.651	712.952	585.738	255.135	810.69	825.024	700.546	661.604	888.09	719.47	667.318	761.35	551.724	783.688	795.848	673.301	681.951	1134.32	752.907	564.215	852.237	586.42	495.575
ASB9	140462	68.0457	66.8954	88.9753	23.4364	76.9727	134.88	56.5092	82.3283	16.2297	100.962	199.139	292.321	70.776	222.276	35.5576	100.732	51.5372	95.7684	160.313	74.4238	177.504	157.084	23.0415	77.6746	216.531	44.555	155.274	230.104	100	230.503	107.456	114.341	170.698	22.5162	126.337	87.2492
ASCC1	51008	448.557	504.86	279.567	358.632	314.09	300.687	194.44	462.507	553.059	256.611	503.767	910.479	420.955	434.383	410.937	705.124	429.136	673.497	316.227	325.465	605.6	344.969	328.917	520.762	437.718	533.712	453.797	441.753	474.272	597.621	262.613	253.392	562.587	388.029	652.263	382.401
ASCC2	84164	1514.97	1277.3	1739.64	1312.99	1511.56	1296.39	1137.48	1724.7	2664.17	1944.71	1829.39	1202.8	941.83	1313.8	1295.38	1510.98	2021.69	1127.84	1741.45	1635.1	1274.8	788.501	1558.76	2862.73	2507.57	1133.78	1491.05	1529.41	1328.64	1204.24	1407.42	2055.23	992.263	1569.75	1469.96	1824.26
ASCC3	10973	733.261	573.471	696.73	997.411	1063.15	397.766	216.315	1568.96	457.553	205.529	490.85	756.894	2461.43	268.765	648.588	3818.22	1256.28	657.907	546.432	1944.64	738.965	383.47	278.226	486.566	2300.35	961.251	466.867	1113.03	761.65	1901.93	670.423	705.426	421.533	1770.9	898.354	1439.86
ASCL1	429	1.6331	4.574	1.4586	0	0.5166	0	0	1.0488	2.4969	0	0	0.4243	0.4626	1.4528	0.4501	0	1.0205	0.4454	3.4213	0.3703	0	2.0534	0.576	0	4.6566	0.474	0	0	0.4854	0	1.0484	0	0	22.5162	1.2346	2.9914
ASCL2	430	38.1056	8.0046	29.1722	13.6258	39.7779	5.1546	53.4711	15.2071	35.5805	7.2115	9.6878	33.5172	30.9934	37.7724	3.1507	3.7308	1601.22	7.5724	16.6178	19.2539	6.1699	15.4004	10.9447	11.236	13.9697	19.4336	23.0035	4.0369	7.2816	3.9354	6.2901	4.845	2.2803	2.2516	3.7037	30.4126
ASCL3	56676	0	0	0.4862	0	0.5166	0	0	0	0	0	0	0.4243	0	0	0	0	0	0	0	0	1.4238	0	0	0	0	0	0	0	0.4854	0	1.5725	0	0	0	0	0
ASCL4	121549	0	2.287	0	0	0	0	0.6076	0	6.8664	0	0	0	0	0	0	0	0	0	0.4888	1.1108	0	0.5133	0	0.4885	1.1641	0	1.5684	1.1534	0	0	0	0	0	18.3882	0.4115	0
ASF1A	25842	287.969	182.39	297.557	424.581	309.441	198.454	105.727	219.192	483.77	224.159	92.0344	467.543	498.207	155.932	139.08	350.164	978.696	153.229	236.559	216.607	260.56	179.158	141.705	263.312	755.53	132.717	233.695	217.416	220.874	318.769	136.286	167.636	179.493	394.033	162.963	716.44
ASF1B	55723	175.286	334.477	302.419	1227.96	497.482	122.852	52.2558	447.299	395.131	1100.36	780.409	168.435	95.7558	657.143	266.457	359.757	338.819	175.946	577.224	273.998	208.353	225.873	392.281	497.802	301.513	355.966	348.713	278.547	431.068	192.273	373.214	280.523	143.334	117.835	92.5926	796.71
ASFMR1	100126270	0.5444	0	0	0.545	0	0	0	0.5244	0	0	0	0.8485	0.9252	0.4843	0.4501	0.533	0	3.5813	0	1.1108	0	0.5133	0	0	0	0	0	0.5767	0	0.5622	0.5242	1.4535	1.3063	0.3753	0	0
ASGR1	432	36.4725	53.745	17.5033	12.5358	39.2613	199.313	497.038	3148.93	41.1985	1040.87	1364.91	373.78	18.0409	1646.49	39.1583	169.486	318.918	187.973	112.415	1669.54	1612.72	263.347	638.249	438.202	5930.15	18.9596	4515.49	3807.38	1181.07	280.539	114.271	281.492	322.502	2083.5	1165.43	124.642
ASGR2	433	60.4246	495.14	3.8896	3.2702	394.679	11451.9	19662.8	6510.23	21.8477	14951.3	1969.32	1420.45	91.5925	16128.8	58.5124	5699.62	167.879	1640.98	2880.25	2349.72	7952.54	294.148	30602	4988.76	26506.4	21.8035	11169.8	19456.2	13668.9	2204.96	691.915	382.752	5753.56	25403.1	4355.14	955.254
ASH1L	55870	1174.49	1873.59	1055.92	1498.25	1858.62	2834.26	649.552	1448.79	706.586	725.841	782.314	8117.71	2887.15	1813.67	1569.91	4136.3	1731.63	2476.98	3034.16	2235.78	2620.79	1033.37	626.031	653.053	1807.92	1454.21	1360.4	1428.18	1441.21	3341.98	2470.41	1660.3	4451.34	2402.2	1917.56	705.367
ASH2L	9070	800.762	893.654	1031.24	1378.93	972.233	754.295	1000.15	481.384	1013.11	788.462	416.577	908.358	597.201	833.898	787.217	1171.48	550.58	1278.84	562.072	550.958	555.766	778.747	782.258	699.072	742.724	886.361	798.327	698.962	686.408	785.396	599.659	872.577	1002.04	1301.81	755.967	1199.55
ASIP	434	3.2662	1.1435	0.4862	0.545	0.5166	0	8.5068	2.6219	6.2422	0.601	0.5382	0	0.4626	0.4843	0.4501	0	1.5308	0.4454	0.4888	0.3703	0.4746	0	0	0	0	0	0	0	0	0	0.5242	0	0	1.1258	0.4115	1.9943
ASL	435	694.611	1712.41	1177.1	1967.03	1250.16	1359.97	1379.92	1495.54	537.453	923.678	3783.64	820.535	539.84	1356.42	2123.55	930.572	867.968	970.156	1930.11	1270.39	1119.13	1995.89	5327.19	4647.29	7428.41	1451.36	1875.83	2420.99	887.864	1106.41	670.947	1200.1	1133.32	908.153	1405.76	1076.9
ASMT	438	0.5444	0	0	5.9954	0	6.0137	4.2534	0	13.1086	2.4038	0	0.4243	0	6.7797	0	0	0	0.4454	2.4438	0.7405	0.4746	5.6468	0	1.4656	1.1641	0.948	1.0456	0	1.4563	1.1244	1.0484	0.4845	1.9546	0	3.2922	0.9971
ASMTL	8623	621.606	871.332	1046.8	723.259	356.451	353.952	1247.98	1449.4	1326.62	251.635	749.08	620.704	584.249	532.203	789.468	427.445	771.323	536.303	407.991	1136.31	421.452	520.534	641.129	400.098	759.895	558.36	795.713	445.213	485.922	717.308	576.071	278.585	337.487	2269.62	370.671	615.605
ASNA1	439	1211.21	2321.33	1272.88	1129.31	1682.04	1563.57	2900.81	1331.41	1075.53	2273.44	2500	979.211	1593.15	1709.93	1665.35	1506.18	637.837	1400.89	1257.09	1348.51	1826.29	1606.26	2688.94	3201.27	1684.52	1488.8	1674.03	1474.63	1346.12	1053.57	1885.99	1903.59	1306.95	1469.18	1460.91	2138.85
ASNS	440	408.819	931.961	3094.69	632.784	1072.45	544.673	907.185	1714.74	1169.16	597.957	1719.59	325.414	729.502	1081.84	1545.63	323.515	767.445	317.595	956.5	482.459	412.909	990.76	830.069	1659.99	677.532	1936.72	585.544	689.735	651.456	616.736	128.423	890.504	359.313	395.534	543.21	503.054
ASNSD1	54529	908.547	781.59	678.741	747.786	682.939	408.935	612.487	830.1	921.972	668.87	574.812	1126.01	664.739	688.62	867.334	599.596	1017.99	868.151	1037.15	682.773	841.955	877.823	690.668	637.518	587.893	854.604	991.243	837.37	826.214	1173.88	705.543	622.577	595.163	768.928	899.588	1011.59
ASPA	443	25.0408	5.1458	6.3207	7.0854	8.2655	0.8591	13.9754	25.1704	24.3446	1.8029	1.6146	8.9096	18.5035	0.9685	12.1526	8.5276	1.0205	9.7996	12.219	4.8135	79.2596	0.5133	11.5207	0	9.3132	0.948	13.593	5.767	1.9417	7.3086	1.0484	10.6589	2.2803	106.952	10.6996	4.4871
ASPDH	554235	0	1.7153	1.9448	2.1801	2.583	0	0.6076	189.827	3.1211	68.5096	106.028	0.4243	0.9252	1.937	0.9002	2.6649	6.6335	0.4454	1.955	115.894	134.789	2.5667	0	0.4885	24.447	0.948	564.109	155.133	0.9709	0.5622	0.5242	21.3178	1.9546	3.3774	71.1934	0.4986
ASPG	374569	15.7866	2.287	2.431	0.545	1.5498	0	1.2153	283.167	0	26.4423	223.358	0.4243	0	0	0.4501	0	188.8	14.6993	1.955	557.993	132.416	1.54	1.7281	0	461.001	0	90.9685	128.028	0.9709	1.6866	0	23.2558	3.2576	0	130.453	6.4814
ASPH	444	4750.39	2342.55	11512.2	2328.14	4641.51	766.443	357.898	6015.23	549.432	2494.36	2725.96	1239.29	2161.36	1574.46	5015.76	1569.8	16657.4	2872.27	3168.71	4049.2	1143.26	3142.79	911.665	1500.99	1413.78	3768.59	1452.99	2350.66	2228.67	1728.28	3022.2	3974.57	4020.59	240.987	2431.48	13715
ASPHD1	253982	272.183	840.48	260.605	406.595	324.939	1420.96	1543.98	1101.73	6.8664	1716.95	2058.67	179.465	697.12	553.027	493.305	310.724	138.793	234.744	195.503	12.2188	339.345	800.308	2645.74	1715.19	237.485	869.771	422.951	1886.97	738.35	150.108	513.17	128.392	476.586	254.058	855.967	645.644
ASPHD2	57168	240.065	46.8839	775.495	32.157	190.624	113.402	15.7983	60.3041	282.772	39.6635	179.225	44.5482	82.8033	146.731	494.655	41.572	54.0885	91.7595	320.137	76.6454	48.8847	52.8747	47.235	171.47	72.1769	99.0639	98.2878	34.6021	94.1748	130.993	74.9574	76.5504	91.5384	114.457	90.9465	163.53
ASPM	259266	123.571	122.927	247.478	614.253	616.815	23.1959	6.6839	202.936	115.481	658.053	248.655	272.804	149.879	546.731	278.159	772.812	1125.65	227.617	767.84	235.86	691.03	147.331	105.415	118.71	862.631	365.446	239.969	230.104	406.311	520.037	284.104	444.283	326.737	22.5162	197.531	769.787
ASPN	54829	2946.11	860.492	1097.85	109.552	384.347	417.526	665.958	962.244	51.186	57.0913	200.754	626.644	746.617	311.864	603.128	364.021	259.727	1419.6	873.9	929.001	1501.66	292.608	1079.49	145.09	667.055	340.799	725.657	934.833	730.097	733.111	361.683	623.062	1019.3	507.365	552.675	558.395
ASPRV1	151516	62.6837	17.307	24.7964	25.3223	38.0163	16.7182	52.2558	13.2354	123.72	32.5721	14.1496	12.3038	56.792	52.0678	29.8909	18.9845	31.6775	16.8419	61.8475	20.7979	76.3075	11.8634	29.9539	28.8227	186.123	15.0207	29.3661	18.4544	42.0874	31.6407	78.0553	47.9651	8.9877	52.2413	26.428	20.9398
ASPSCR1	79058	608.601	525.443	785.706	596.812	735.632	597.079	1334.95	632.407	898.876	1086.54	1135.09	470.089	653.174	687.167	508.158	551.095	6955.99	304.232	650.538	606.498	413.859	574.435	834.677	1117.73	1074.51	407.631	709.973	592.849	689.32	481.245	779.976	1374.52	482.124	363.636	358.025	613.736
ASRGL1	80150	219.924	43.4534	307.281	2907.75	63.0247	462.199	250.949	40.9019	197.253	264.423	6829.39	116.674	51.8099	112.349	61.6631	21.8519	197.984	72.1604	302.541	114.042	92.074	22.5873	38.0184	135.32	761.35	17.5376	61.1685	62.2837	460.194	46.6628	400.472	48.9341	53.0988	142.602	155.967	158.544
ASS1	445	2439.3	13132.6	1121.19	5706.5	6500.32	2332.47	10874.1	4144.21	272.16	2551.68	4008.61	5066.61	4575	373.85	3964.89	3516.56	2573.8	2079.29	1485.83	3596.78	2194.59	4309.03	17270.7	7700.05	3956.93	14975.2	4822.38	6761.82	1171.84	891.652	3037.61	2439.92	1134.29	1316.45	3929.22	652.624
ASTE1	28990	213.032	133.791	139.429	272.195	171.024	92.6117	141.249	118.259	327.778	144.417	106.932	183.865	198.811	88.1356	129.718	191.167	179.605	188.191	181.334	75.9752	158.296	97.6848	60.0864	139.111	164.552	97.9879	225.863	100.352	83.466	190.755	129.619	177.166	139.304	209.506	100.65	176.433
ASTL	431705	2.7218	1.1435	0	2.1801	1.0332	0	1.2153	1.5732	13.1086	4.8077	0	1.6971	0	4.3584	3.1507	0.533	2.5513	0.4454	0.9775	2.9621	0.9492	0	0.576	4.3967	0	0	3.6597	1.1534	0.4854	1.1244	0.5242	0.4845	1.6288	0.7505	2.0576	0.9971
ASTN1	460	20.6859	4.0023	7.2931	0.545	4.1328	2.5773	0	6.2926	66.1673	0.601	1.0764	0	0	1.4528	6.7514	0	0.5103	2.6726	1.4663	4.0729	12.8144	1.54	2.8802	0	9.3132	0.474	9.4105	5.1903	0	0.5622	3.1451	1.938	1.303	3.0022	5.3498	0.4986
ASTN2	23245	50.0817	60.6061	50.5652	73.0345	62.5081	298.11	89.9286	55.0603	56.1798	59.4952	65.1238	75.5197	74.4767	57.6271	55.8119	185.475	106.646	117.595	104.106	66.6482	85.4295	110.883	64.5161	145.579	48.8941	96.2199	89.4001	85.3518	99.5146	62.4044	26.2089	64.9225	38.4396	415.048	68.3128	120.155
ASXL1	171023	2071.31	2522.01	1183.91	1216.51	2323.65	1536.08	1801.61	2196.64	2368.29	1804.69	1369.21	2669.07	3487.45	3463.92	2349.95	1813.18	2164.05	2296.21	2757.58	2969.18	2579.5	3644.76	1877.88	1332.68	1295.69	2028.68	1762.91	1886.97	2565.53	2293.22	2543.83	1660.85	3109.7	1832.44	2291.77	1367.57
ASXL2	55252	352.749	368.782	299.988	359.722	757.329	349.656	18.8364	882.014	68.04	46.875	182.454	569.368	1056.55	186.441	987.96	869.28	493.941	604.009	493.157	659.076	668.249	77.0021	38.5945	119.199	130.384	455.504	173.572	193.195	464.563	675.205	776.307	591.57	188.615	772.68	429.63	213.387
ASXL3	80816	5.988	5.1458	126.899	0	3.6162	7.732	0	8.3901	4.3695	0	22.0667	0	0.9252	0	4.0509	0	21.4313	0.8909	2.9326	3.3324	2.8477	13.8604	0.576	0	1.1641	0.948	2.614	2.3068	0.9709	1.1244	0.5242	0.969	2.2803	0.7505	4.9383	12.4642
ASZ1	136991	0	2.8588	0	0	0	0	0	0	0	0	0	0	0	0	0	0	0	0	0	0	0	0	0.576	0	0	0	0	0	0	0	0	0	0	0	0	0.4986
ATAD1	84896	1303.76	1341.91	871.764	860.608	974.816	1591.92	584.536	1380.7	611.111	352.163	1512.38	1970.3	1205.04	963.68	713.402	1478.47	1045.54	1283.74	747.312	635.749	835.311	860.37	948.733	902.296	888.242	1616.31	798.327	1109.57	1123.3	801.138	969.205	1025.68	1757.8	1129.94	1199.18	800.698
ATAD2	29028	363.092	473.985	337.912	1377.3	775.927	160.653	68.6617	554.798	383.271	688.101	649.623	531.608	390.887	1507.51	768.313	1105.39	935.323	489.532	998.045	870.129	680.588	271.561	215.438	407.914	2934.81	447.92	461.116	386.967	715.534	697.693	557.725	344.477	1651.27	451.074	761.728	1088.37
ATAD2B	54454	275.449	240.137	241.157	355.362	277.412	333.333	84.46	318.301	398.252	270.433	212.594	357.658	378.86	318.644	478.452	296.333	489.858	369.265	409.58	430.991	437.114	206.879	99.6544	164.143	220.023	267.33	298.523	208.189	363.592	452.01	390.512	165.698	160.274	449.948	335.391	146.08
ATAD3A	55210	565.052	481.418	685.061	722.714	1069.35	341.924	624.032	998.427	840.824	589.543	757.804	314.807	404.302	1005.81	436.143	360.823	1111.37	409.354	637.83	1168.93	321.784	482.546	687.212	668.295	988.359	385.828	650.372	416.955	500.971	218.134	440.309	592.539	315.661	249.93	623.868	1103.33
ATAD3B	83858	290.691	174.385	354.443	371.168	468.036	333.333	467.872	385.947	1267.79	474.76	577.503	334.748	286.342	858.596	252.054	238.239	1257.3	261.024	458.944	620.198	288.562	351.129	392.857	275.037	400.466	303.353	394.197	297.001	416.99	262.548	191.325	229.167	294.161	294.587	372.428	429.266
ATAD3C	219293	185.629	44.0252	93.3512	87.7504	56.3089	10.3093	415.616	175.144	117.978	435.697	126.48	299.958	80.9529	745.763	99.9212	153.496	48.4756	195.991	237.537	189.207	141.908	839.322	7.4885	19.5408	20.9546	30.3353	960.397	34.0254	66.0194	1407.19	18.3462	110.465	15.9622	4.8785	127.572	16.9513
ATAD5	79915	35.3838	61.7496	57.8583	138.439	103.319	33.5052	18.2288	75.5113	83.0212	76.3221	156.082	71.7013	55.5106	196.126	108.023	98.6001	264.319	75.7238	183.285	104.786	112.008	50.308	27.6498	19.0523	67.5204	61.6187	87.3088	37.4856	100.485	104.57	147.818	58.624	77.205	34.9001	73.6626	96.2234
ATCAY	85300	0.5444	0	13.6137	0.545	0.5166	0	0	1.0488	0	0	0	0	0.4626	0	0	1.0659	0	2.6726	0.4888	1.1108	0	0	0	0	0	0	0.5228	0	0	4.4976	0	0	0	0	0.4115	2.9914
ATE1	11101	178.552	124.071	129.33	277.422	169.443	314.433	17.0135	292.082	21.2235	45.0721	189.451	455.664	173.933	154.479	356.926	255.294	264.83	269.488	162.757	156.993	280.019	43.1211	17.2811	80.1172	102.445	178.22	120.246	110.727	271.359	224.881	461.801	165.698	285.691	409.044	262.551	50.8538
ATF1	466	476.32	469.983	377.781	450.743	429.291	306.701	194.44	324.594	297.129	216.346	317.007	532.881	408.465	455.69	393.384	532.441	352.086	500.668	358.749	443.21	393.925	366.53	267.857	210.064	342.258	364.972	437.59	267.589	455.825	424.462	621.151	443.314	415.343	609.438	426.749	446.716
ATF2	1386	421.339	431.675	355.901	361.357	475.785	313.574	52.2558	851.599	100.499	106.37	248.116	556.64	581.011	221.792	692.697	770.68	497.002	429.399	437.928	259.928	468.438	101.643	74.8848	139.717	321.304	415.689	204.94	311.419	454.854	473.936	630.586	605.136	305.562	464.959	397.942	245.793
ATF3	467	495.373	699.828	1315.18	1808.97	339.92	663.23	527.419	1963.82	130.462	337.139	306.781	372.083	547.242	383.535	1113.54	1177.87	156.142	288.196	522.972	645.006	1139.53	1106.78	286.866	337.079	541.327	2315.44	501.372	499.423	332.524	1100.23	230.638	129.845	325.108	800.075	6967.49	219.369
ATF4	468	7639.63	8970.27	6731.01	4632.78	9196.44	9343.64	10521.6	9486.63	9026.84	14022.2	9155.54	6403.9	4508.38	9302.66	9689.21	3584.78	10503.9	8910.47	9942.33	9241.14	7450.4	14737.7	8866.36	10783.1	4712.46	6742.51	8964.58	11337.4	10019.4	6198.28	4549.34	7766.96	8049.19	4141.1	9069.55	6896.67
ATF5	22809	730.539	511.149	923.788	776.128	1054.89	968.213	1287.56	5616.15	1147.94	1868.39	2068.35	640.221	414.016	812.106	437.043	1111.25	655.696	403.563	1009.78	2949.55	2482.68	475.359	1097.35	1776.75	75192.1	530.869	3030.71	2183.39	657.282	365.993	296.685	1217.54	476.586	586.171	1671.19	964.228
ATF6	22926	1376.16	1646.66	1343.87	768.497	1246.03	2589.35	493.392	1786.58	452.559	538.462	1005.92	3523.97	2296.75	1394.19	1401.6	3066.2	1304.76	2057.91	2103.62	1739.15	1638.35	1232.55	774.77	823.644	2403.96	1463.68	1329.5	919.838	1083.5	2164.48	1843.01	1646.8	3638.73	1379.87	1714.4	1329.18
ATF6B	1388	3649.43	2512.29	2295.48	2399.24	2122.17	4329.9	1861.77	2737.81	3005.62	2064.3	1666.31	4552.82	2975.37	3724.94	2761.79	2934.55	3643.83	2486.68	2858.26	3951.12	2570.48	3565.37	3095.62	2245.73	2387.23	1548.05	2531.96	2372.55	2024.27	3152.27	3219.5	3240.31	3674.57	2342.06	1611.52	2361.71
ATF7	11016	1511.7	2023.07	888.027	867.246	1889.94	2434.42	1081.57	1413.74	534.956	1369.59	1265.66	2071.43	1601.88	1680.16	1729.72	2095	910.32	2917.31	1537.21	2387.68	1923.75	1291.07	805.299	711.212	723.516	1896.06	1121.05	1405.47	1802.54	1767.56	5417.43	1888.5	1482.08	1614.14	1662.71	892.434
ATF7IP2	80063	145.89	31.4465	186.216	41.4225	76.9727	17.1821	34.6347	76.56	903.87	132.812	51.6685	488.333	97.6061	7.7482	70.2149	93.2704	177.063	149.666	170.088	130.704	76.412	101.129	19.0092	74.7435	356.228	130.821	257.221	34.0254	22.8155	309.211	102.739	95.4457	32.2502	269.819	102.469	59.828
ATF7IP	55729	603.702	468.839	732.709	651.315	1225.88	622.852	268.571	812.271	566.792	577.524	332.077	1180.74	1389.61	412.106	1127.94	1201.86	458.732	1830.29	795.21	1298.16	1353.11	474.333	150.922	744.016	478.463	392.464	454.32	531.142	846.116	1760.82	783.646	892.442	980.536	1419.65	831.687	626.2
ATG10	83734	87.6429	104.631	74.8754	62.1338	71.2902	81.6151	154.945	103.304	64.9189	143.029	71.0441	92.0662	160.055	108.959	115.675	137.507	65.3145	277.506	100.195	127.002	106.312	97.0226	112.903	140.205	190.92	125.607	109.79	94.0023	109.223	83.2059	41.9342	96.4147	66.4549	148.607	127.16	90.7391
ATG12	9140	494.284	510.006	600.948	324.84	709.802	492.268	401.033	668.589	601.748	423.077	432.185	378.447	448.711	445.036	734.106	411.989	376.068	595.991	429.619	577.617	423.351	384.497	316.244	527.601	641.443	511.909	382.695	483.276	544.66	402.537	785.218	512.112	444.336	629.703	567.49	553.409
ATG16L1	55054	681.546	727.273	589.279	537.948	994.963	896.907	455.719	1101.21	1011.24	766.226	1031.22	906.661	900.197	862.954	1112.64	833.038	823.064	665.479	843.597	865.686	716.184	672.485	702.765	948.705	832.363	695.817	726.18	972.895	895.631	939.44	961.342	925.872	574.965	901.023	972.428	983.672
ATG16L2	89849	334.034	226.478	376.842	315.896	352.179	288.333	271.268	246.177	3084.43	461.827	267.045	389.868	488.521	403.966	301.632	182.501	1479.22	262.967	449.394	248.361	501.334	323.984	288.076	286.986	191.35	397.621	433.507	269.55	454.976	336.354	228.5	163.74	334.675	261.935	422.761	500.272
ATG2A	23130	816.549	632.361	984.077	798.474	1087.95	1294.67	1069.42	882.538	1359.55	1051.08	1588.81	784.048	1355.38	1438.26	1146.39	760.553	460.263	920.267	702.835	772.378	1148.55	1407.6	1235.02	1032.73	682.189	888.731	1074.37	820.069	1354.37	1093.48	1094.48	1031.01	926.134	1135.57	973.251	1068.93
ATG2B	55102	931.954	444.254	778.899	940.183	640.579	725.086	308.066	481.384	780.275	457.933	368.138	1167.16	1345.67	850.847	690.447	1308.98	508.228	1469.04	826.491	1891.7	1484.58	506.673	361.751	322.912	769.499	519.967	551.562	861.015	1496.12	1612.96	891.102	677.81	555.746	1546.49	540.741	536.458
ATG3	64422	746.326	800.457	875.653	741.79	864.264	627.148	703.023	779.234	735.331	469.351	916.039	668.222	934.891	358.838	717.002	947.627	577.625	530.958	780.059	449.505	542.952	622.69	569.124	997.069	983.702	793.459	713.632	633.795	360.68	512.166	367.973	663.275	622.852	942.678	512.346	1269.35
ATG4A	115201	317.365	260.72	352.012	179.861	232.985	206.186	120.31	304.667	317.728	163.462	568.353	257.106	229.444	212.591	260.155	259.025	110.218	210.69	312.805	331.76	234.931	301.335	308.18	431.851	740.396	315.677	250.425	358.708	234.466	232.752	178.22	179.264	173.956	521.25	277.366	313.1
ATG4B	23192	1007.08	1494	1076.46	1487.4	963.451	1029.21	1912.2	1181.96	2612.36	2188.7	1799.78	1592.28	1442.35	2181.6	1297.63	1100.59	1704.3	682.405	1735.09	1253.73	1209.78	1765.4	1980.41	1565.22	1561.12	1427.66	1570.51	1918.11	1765.53	1690.54	1047.83	1141.96	1314.77	1054.51	966.667	1408.95
ATG4C	84938	207.948	76.0435	161.906	112.822	143.097	44.6735	62.5854	97.5354	345.818	161.058	165.231	130.25	168.382	116.707	192.641	85.2758	118.382	290.423	296.676	125.15	225.914	147.331	98.5023	141.182	145.518	77.2603	188.211	111.88	75.7282	220.383	188.18	106.105	55.0533	174.125	227.161	194.441
ATG4D	84971	308.503	754.345	451.095	418.607	492.75	546.761	635.455	306.807	778.901	736.707	434.273	364.387	388.842	542.925	642.791	534.674	409.287	291.256	370.108	398.438	375.681	752.895	1705.45	681.07	1026.5	840.806	374.011	489.198	347.257	388.319	313.637	757.529	500.51	688.931	332.695	566.427
ATG5	9474	670.114	529.445	697.703	839.896	588.402	353.952	362.145	699.004	564.919	372.596	435.953	543.487	768.822	392.252	368.178	423.181	1237.4	403.563	416.422	448.764	422.401	498.973	375	317.538	908.033	420.903	480.983	501.153	362.621	732.549	378.981	396.802	337.812	760.297	525.926	861.523
ATG7	10533	720.207	453.408	1252.32	538.88	619.543	306.211	571.423	732.281	959.082	434.934	613.649	516.754	580.072	409.956	458.404	461.273	462.227	446.107	299.863	525.643	401.092	470.596	862.465	653.229	381.641	510.004	487.194	380.311	461.121	606.734	453.45	455.15	550.612	699.765	442.617	1316.42
ATG9A	79065	1699.61	2165.2	1589.3	1827.4	2039.32	1247.95	1664.36	1740.9	1468.99	2176.86	1620.18	1846.17	2150.85	2545.33	1211.35	1176.43	1915.29	1772.59	2261.66	1800.15	1651.11	3019.29	2574.41	2551.14	3298.14	1931.01	1804.82	1280.31	3019.71	3064.65	2327.99	2019.52	1775.08	2745.92	1980.46	2026.69
ATG9B	285973	130.953	55.7633	22.6085	48.0774	68.9242	73.7285	16.175	138.962	176.866	21.3462	29.3918	16.5931	10.6025	238.32	122.174	20.8393	25.8145	27.6704	116.901	25.3004	13.9013	27.4179	11.1809	28.7494	31.2456	27.4582	28.3048	42.0704	67.1214	28.0145	5.7607	234.743	3.4205	2.8558	93.3827	11.9457
ATHL1	80162	3257.49	1196.68	1813.05	4106.83	941.754	2375.43	10647.4	1132.14	13677.3	3147.84	1104.95	3902.84	2125.59	1220.82	1705.86	787.735	4641.92	3115.81	15927.2	3178.01	1520.17	1999.49	2985.6	951.148	3707.8	1559.43	1475.89	869.665	1632.04	4149.61	4850.74	3862.4	1516.08	193.639	2040.33	1098.34
ATIC	471	1605.33	2409.95	1465.9	1810.6	3598.09	2035.22	3595.32	4738.33	1965.67	3394.23	4112.49	3156.55	2000.69	1937.53	2067.74	4057	3459.62	2699.78	2425.22	2322.69	2130.04	2761.81	4862.9	4460.19	1231.66	2992.3	2577.44	1672.43	2672.82	3327.11	3116.76	4313.95	2006.68	1153.2	2906.17	3009.35
ATL1	51062	219.379	21.7267	172.116	105.737	19.114	85.0515	17.0135	63.4504	51.186	45.0721	160.387	22.4862	28.6805	85.23	42.7591	13.8573	77.5609	73.9421	57.1848	40.7294	40.3417	35.4209	8.6406	57.6453	8.149	243.631	72.6702	188.005	341.262	47.225	116.367	213.178	187.637	280.327	237.86	58.3323
ATL2	64225	1234.62	575.758	641.303	1488.49	849.283	541.237	233.328	938.123	677.278	595.553	581.808	633.857	644.385	876.998	1127.94	674.212	2179.87	653.007	1107.53	1486.99	740.864	790.041	345.622	462.14	1722.93	879.725	662.397	614.764	613.592	1074.37	741.187	746.124	461.927	649.592	913.58	484.607
ATL3	25923	383.778	205.832	536.283	218.013	225.236	217.354	194.44	343.471	86.1423	178.486	210.441	285.957	361.744	88.6199	432.542	305.394	79.0917	415.59	183.285	218.088	442.335	132.957	118.088	342.452	467.986	337.007	221.148	153.979	264.563	396.352	246.888	260.174	220.539	515.245	285.597	684.033
ATM	472	1063.15	696.398	1002.07	666.576	1230.01	739.691	277.685	950.183	3033.08	789.663	465.554	1117.1	1984.97	496.852	1176.1	1962.41	1026.15	1244.54	880.743	622.42	1860.47	349.076	491.935	624.328	505.239	1239.94	811.92	581.315	1466.99	1297.56	855.458	1572.67	788.989	936.298	1122.63	607.254
ATMIN	23300	1524.22	1228.7	973.38	1723.4	1324.55	1835.05	1265.68	1855.79	1009.36	1408.65	1023.68	1526.94	1087.08	1224.7	1497.47	1369.74	1234.85	949.666	1268.33	1444.04	1467.49	731.519	918.779	1021.98	977.881	1668.92	1364	1023.07	1333.98	839.93	1754.95	990.31	1097.48	1787.79	1596.71	1083.39
ATN1	1822	3695.7	4487.71	3026.62	4165.69	4699.47	5841.07	3605.04	2470.37	2784.64	5281.85	3364.91	5694.95	4698.97	4823.73	3376.62	5581.3	3401.96	4311.36	3848.48	5488.11	4114.86	4434.8	2066.82	3215.44	1608.85	4001.9	3355.9	4182.24	4773.79	4056.85	3687.07	5545.54	11511.4	3451.36	3005.76	4306.12
ATOH1	474	0.5444	0	0	65.404	0	0	0	0	0	0	0	0	0	0	0	0	44.3934	0	0	0	0	0	0	0	0	0	0	0	0	0	0	0	0	0	0	0.4986
ATOH7	220202	6.5324	1.1435	2.9172	1.6351	0	2.5773	3.0381	1.0488	1.8727	3.6058	2.1529	2.5456	3.2381	15.9806	0.4501	1.0659	1.0205	2.2272	11.2414	1.4811	2.373	6.1602	1.1521	0.977	20.9546	0.948	4.1825	4.6136	1.9417	1.6866	0	3.3915	1.9546	29.271	1.2346	0.4986
ATOH8	84913	184.54	1581.48	85.5719	5.4503	64.0579	16.323	526.204	222.863	572.409	25.2404	300.323	529.062	212.328	50.3632	39.1583	9.0606	192.882	622.717	91.8866	278.441	1915.52	930.185	493.664	7.3278	2694.99	278.232	403.607	126.874	87.3786	41.603	158.826	77.5194	795.505	2334.93	138.272	807.678
ATOX1	475	826.347	963.979	856.691	566.835	997.546	512.887	2302.9	933.928	2124.84	1260.22	1569.43	560.458	992.714	1368.52	1622.14	663.019	531.701	932.294	794.233	1858.74	542.952	1349.59	1260.94	3227.65	3945.29	801.517	1359.82	974.625	603.398	680.827	866.99	808.624	613.405	934.797	1301.65	1730.52
ATP10A	57194	457.267	206.975	260.119	556.479	185.974	77.3196	73.5227	133.194	360.799	16.8269	560.28	156.979	131.838	146.247	90.0191	87.9407	155.122	385.746	209.677	218.828	139.06	69.8152	233.295	59.1109	54.7148	167.792	67.4422	71.511	208.738	320.455	77.5783	195.736	356.055	606.436	178.601	316.59
ATP10B	23120	178.552	743.282	611.158	712.359	193.207	1030.93	295.914	2.0975	1.8727	29.4471	23.6814	7.2126	4.6259	0.9685	184.539	25.0498	386.784	4.4543	62.5611	5.554	19.4589	2.0534	0	7.3278	4.6566	4.7399	0.5228	0	1.4563	29.2345	11.0077	4.3605	13.3561	12.0086	179.424	49.3581
ATP10D	57205	434.404	235.563	633.524	105.737	410.693	91.9244	53.4711	271.631	276.529	88.3413	70.5059	268.562	278.941	161.259	603.578	510.056	103.585	708.24	280.547	254.744	483.151	140.657	154.954	60.0879	218.859	587.273	140.112	193.772	446.602	491.927	195.518	456.395	176.887	461.957	191.358	474.635
ATP11A	23250	1842.13	2205.26	1149.87	6033.52	2563.35	2592.78	604.588	1404.3	362.672	1002.4	1221.21	5805.69	1018.62	1960.77	2173.96	3684.45	2685.04	2836.53	2840.18	4734.98	4348.36	807.495	1082.37	1128.48	1508.73	2182.72	1059.21	3588.81	2987.86	3372.09	2505.57	2013.57	8479.84	2957.5	1767.9	808.177
ATP11B	23200	1608.6	806.747	1315.67	1729.39	1052.31	602.234	250.949	1422.65	1017.48	476.562	811.087	1290.62	1260.09	621.792	722.404	1361.75	1263.43	1005.79	1755.62	1712.49	1579.97	770.534	559.332	753.786	1263.1	1926.29	854.267	696.078	467.476	1317.24	566.112	953.004	929.066	2994.28	1034.16	1092.86
ATP11C	286410	541.644	323.042	518.293	350.457	467.519	216.495	210.846	363.922	519.351	113.582	222.282	169.707	810.917	114.286	400.135	248.899	404.643	278.396	273.705	418.032	442.335	160.678	142.281	116.268	169.965	382.036	387.923	201.269	106.311	301.902	460.752	379.361	168.092	192.138	206.173	629.191
ATP12A	479	2.1775	0	0	0	10.3319	0.8591	0	0.5244	0	0	0.5382	214.68	0	0.9685	0	41.572	1.0205	0	0.9775	2.5919	0	0	0.576	5.3737	0	0	0	17.8777	0	25.2991	0.5242	0.969	3.2576	43.156	0	0
ATP13A1	57130	1612.96	2806.75	1523.76	1753.37	2466.23	2905.5	2669.3	2229.68	4661.67	3427.88	3170.61	2019.09	2194.52	2439.71	1705.41	3051.27	1532.85	1697.55	2435.97	1897.25	2576.65	2603.7	3774.77	2688.81	2440.05	1825.81	1895.18	2260.09	2384.47	1926.67	2901.85	4000.97	2255.56	1529.6	1833.74	2092.48
ATP13A2	23400	991.29	596.913	1540.29	991.416	639.545	634.021	534.711	571.578	1440.07	528.846	1000	689.011	555.106	480.387	926.297	744.564	685.802	884.633	691.593	933.815	457.522	784.908	543.779	1186.61	535.506	1169.81	575.088	303.922	743.204	993.411	868.562	743.217	506.556	934.797	707.819	2673.81
ATP13A3	79572	2571.58	2806.75	2242.37	4731.98	6011.11	6819.59	1732.95	4613.53	735.955	3590.14	3023.14	3664.4	3794.61	1873.12	6697.87	6501.75	2676.36	4032.96	3955.52	6899.94	5439.49	2595.48	1378.46	3708.35	2623.98	6645.34	3774.67	4544.41	2923.79	4727.56	2556.41	5691.86	4186.01	4027.77	2152.67	1848.68
ATP13A4	84239	38.65	9.1481	82.6547	301.404	17.5643	512.887	221.783	3.6707	18.1024	319.712	159.849	13.5766	1.3878	399.031	218.746	0	12.7567	265.924	825.513	24.4377	207.404	85.2156	0.576	0	0	13.2717	501.895	60.5536	55.8252	5.0598	3.1451	2.4225	3.2576	533.258	75.3086	51.8509
ATP13A5	344905	2.1775	0.5718	0.4862	0.545	0	2.5773	4.861	0	0.6242	6.6106	1.0764	0	0	16.9492	0.9002	0	0.5103	1.3363	35.1906	0	0.9492	0.5133	0	0	0	0	14.1158	0	0.9709	0	0	0	0	1.5011	0	0
ATP1A1	476	42272.1	113106	27926.5	65703.1	30913.6	151870	39946.3	57868.3	5443.15	39976.5	48968.7	51061.9	11011.4	73988.8	80608.4	107892	13708.4	153290	27244.8	44368.4	57462.7	92078	81332.3	45697.6	6899.87	47099.4	41135	102136	52803.9	45229.7	56274.6	81433.6	203710	37231.2	87670.2	28057.3
ATP1A2	477	110.506	41.1664	4.862	27.2517	66.6408	3.4364	29.7737	8.9145	28.7141	10.2163	1.0764	22.4862	9.2518	25.1816	58.0623	5.3297	4.5924	50.7795	89.4428	21.8458	46.037	2.0534	15.553	6.8393	4.6566	6.6359	36.5965	40.3691	9.2233	62.9666	31.9748	15.9884	4.8864	239.797	53.9095	5.4842
ATP1A3	478	34.295	40.5946	18.4758	60.4987	24.28	6.8729	8.5068	21.4997	192.884	15.625	170.614	2.1213	254.886	0.9685	205.244	637.97	1.5308	24.4989	15.1515	1.4811	22.7812	3.5934	24.1935	76.2091	230.501	781.609	25.0948	3.4602	1.9417	3.9354	8.3868	1170.54	0.9773	93.0669	14.4033	60.3266
ATP1A4	480	2.1775	0.5718	0.9724	0	12.3983	0	0	1.0488	24.9688	1.8029	1.0764	0.8485	1.3878	0	0	0.533	0	2.6726	0.9775	0.7405	0.4746	0	0.576	0.4885	0	0.474	3.1368	0	0	0.5622	0	0.4845	0	0.3753	0	0.4986
ATP1B1	481	9790.63	24641.7	8072.67	24827.9	8933.01	48716.9	10668.2	9510.57	285.549	14127.6	11337.5	18232.9	13171.5	14402.2	12368.2	32359.9	25132.8	12253.1	25431.5	10301.9	19248	16794.3	16377.7	11490.7	20810	12396	16984.1	33331.3	11739	10998.5	12859.6	54608.7	54245.5	8724.36	10561.8	4311.15
ATP1B2	482	101.252	76.0435	30.6308	31.6119	34.0953	16.323	49.8253	45.097	127.965	18.6298	10.226	36.9113	44.4085	19.3705	56.7121	11.1924	17.8594	73.9421	81.1339	61.8347	107.736	10.7803	32.8341	30.7767	47.7299	15.1677	86.786	61.707	41.7476	38.7919	44.5551	40.6977	24.7577	129.843	56.3786	6.9799
ATP1B3	483	2968.97	1265.87	2019.69	8268.7	1194.89	3931.27	2620.08	2005.24	973.783	4659.86	1944.03	1181.59	1402.57	1541.89	1698.66	1302.59	1378.75	1469.49	1706.74	1213.74	1170.86	965.606	2030.53	3763.56	764.843	2192.68	1736.24	944.637	1024.76	979.918	1003.8	1731.59	923.528	901.023	1791.36	3056.21
ATP1B4	23439	0	0	0	0	0	0	0	0	0	0	0	0	0	0	0	0	0	0	0	0	0	0	0	0	0	0	0	0	0	0	0	0	0	0	0	0
ATP2A1	487	6.5324	21.1549	7.2931	49.053	9.2987	19.7595	75.3456	32.5118	17.4782	233.774	103.337	5.9398	124.899	548.668	22.9549	45.8357	48.9858	4.0089	26.8817	10.7378	29.9003	11.2936	43.7788	22.9604	4.6566	36.9712	69.0106	64.0138	50.4854	64.6532	47.176	40.2132	4.8864	5.2538	14.4033	9.4728
ATP2A2	488	6691.34	5587.76	4105.51	8606.08	7568.13	4567.01	1962.02	5987.94	1368.29	5180.89	6129.17	4972	5143.52	5461.99	3735.79	7603.94	5820.13	8414.25	6734.6	8060.72	8237.78	4443.53	2823.16	6047.39	9215.37	3801.4	3699.91	8286.62	9647.57	8564.59	6896.08	8419.57	4125.09	8490.85	8932.1	7568.74
ATP2A3	489	2296.68	445.397	2493.74	770.132	848.25	119.416	693.301	321.447	16340.8	295.673	252.96	207.891	1044.52	816.949	708.451	292.07	4390.87	550.557	899.804	396.927	921.215	286.961	289.171	273.083	447.031	232.255	1212.39	408.881	426.699	485.18	341.764	223.837	157.668	308.472	1237.86	648.137
ATP2B1	490	1243.88	627.787	854.26	1479.22	504.197	734.536	215.707	888.831	1565.54	225.361	1087.19	137.463	449.173	200.484	360.077	350.164	812.859	632.962	634.897	1001.57	769.815	598.049	424.539	222.276	892.899	1324.33	563.587	691.465	561.165	571.76	840.781	508.721	106.198	1278.54	770.782	2431.51
ATP2B2	491	3.8106	58.319	4.862	2.1801	4.6494	0.8591	8.5068	225.485	6.8664	13.2212	55.436	3205.35	65.6875	169.492	2.2505	1626.64	10.2054	36.5256	31.7693	518.375	171.808	398.357	375.576	111.871	2405.12	10.9018	291.204	64.0138	283.981	110.754	35.6441	381.298	189.918	47.6593	72.8395	16.4527
ATP2B3	492	1.6331	0.5718	2.9172	0.545	0	0	0	0.5244	0	0	0	4.2427	4.6259	0	0	1.0659	0	0	0	0	0	0	0	0	0	0	0	0	2.4272	0	0	0	0.6515	0.3753	0	0
ATP2B4	493	3360.91	699.828	3612.98	866.058	1599.38	845.361	855.537	667.016	1454.43	730.168	287.944	2965.21	1639.41	1057.14	2049.74	1670.34	1332.82	2069.49	3145.16	1656.95	1798.77	629.877	327.765	518.319	998.836	1260.34	1766.57	644.175	1038.35	2485.5	3741.06	4135.17	1483.83	6055.35	2437.04	1927.96
ATP2C1	27032	3140.81	2891.37	2901.78	6263.3	2825.75	3263.92	1451.34	2881.74	1018.04	1815.32	4487.26	2018.94	3048.56	1386.44	2168.92	2368.17	2375.31	2593.1	2114.85	2017.89	1449.2	2153.34	831.619	1553.12	1416.36	3064	1756.1	2099.19	1174.3	2393.13	1407.27	2695.9	2418.56	2215.86	1747.91	2830.92
ATP2C2	9914	403.375	118.925	86.0581	1015.94	490.249	153.78	17.0135	241.741	16.2297	164.062	175.458	582.52	9.2518	52.7845	563.52	99.6661	131.649	320.713	108.504	152.18	597.532	11.2936	6.3364	15.6326	31.4319	14.6937	130.179	7.4971	239.806	533.53	1.5725	4.3605	614.708	51.7872	573.251	137.106
ATP4A	495	0	0	0	0	0	0	0	0	55.5556	0	0	1.6971	0	0	0	0.533	0	0	0	0	0	0	0	0	0	0	1.0456	0.5767	0	0	0	0.4845	0	9.757	0.823	0
ATP4B	496	2.7218	0	0	0.545	0.5166	0	0	0	0	0	0	0	0.9252	0	0	0.533	0	0	0.4888	0	0	0	0	0	0	0	0	0	0	0	0	0	0.3258	0.7505	0	0
ATP5A1	498	4785.52	13540.3	5127.99	7030.93	7910.11	10180.4	14278	8541.16	8502.5	11007.2	11454.3	4417.48	12401.5	10959.3	9250.82	16537.1	5006.76	9394.65	7341.64	5301.49	7837.21	16165.3	28358.3	16147	21351.6	19302.3	11120.6	12666.1	9107.28	7802.8	6743.02	10294.1	11527.3	19435.2	7780.66	9276.33
ATP5B	506	9492.11	29117.2	6304.12	16666	13220.7	14745.7	15323.1	10902.5	6832.08	7530.05	13241.1	8420.45	15269.1	12243.1	16519	19281.4	6500.83	14106.5	8318.18	11598.3	8146.65	17685.8	50578.9	21541.3	34298	27130.2	12152.1	15515.6	10783	7125.91	7818.63	31436.5	10707.4	23247.2	9689.71	13184.6
ATP5C1	509	3426.24	9945.11	2255.99	4258.35	4919.02	5708.76	12500.7	5051.91	2048.69	8865.38	4047.36	5244.8	5949.81	8449.88	6107.8	6938.25	2034.95	12052.1	3587.49	5759.51	3800.66	9240.76	19941.8	10317	6760.19	9652.33	6430.01	5219.15	3421.84	5030.58	3745.25	9431.69	9074.03	5355.85	4819.34	3866.38
ATP5D	513	1089.28	4139.51	1186.82	1488.49	1317.84	1931.27	9565.24	1143.16	2902	7251.8	3625.94	1356.39	1359.55	1613.56	1912.01	1731.1	1161.88	1504.68	1076.74	988.244	1472.71	2418.89	8665.9	3458.72	6445.87	4037.45	2162.33	2766.44	1311.65	1140.15	1543.7	3506.78	1507.61	1527.35	677.778	1510.16
ATP5E	514	6724.55	7214.98	4527.05	4285.05	4960.35	4224.23	12640.4	3529.1	10638.6	9467.55	5932.19	3321.6	3376.43	3402.91	3498.14	4244.07	6595.74	2676.17	4717.99	3261.32	2406.26	7105.75	9648.04	7310.21	6214.2	6087.45	5230.17	5867.94	3286.41	3672.87	4000	5801.84	4062.55	3654.75	5273.66	5778.89
ATP5EP2	432369	25.0408	19.4397	19.4482	16.896	21.697	25.7732	83.2447	13.1096	42.4469	38.4615	20.4521	16.5465	12.4899	19.3705	17.5537	22.9179	31.6367	4.4543	18.5728	12.2188	7.1191	22.0739	35.7143	26.8686	58.2072	21.3295	19.3439	21.3379	17.9612	20.2393	14.677	20.8333	18.2425	12.0086	23.8683	17.4498
ATP5F1	515	2450.73	5336.19	2151.94	4584.28	2931.68	4844.5	3327.36	3557.94	2632.96	3035.46	3868.14	1845.99	3069.27	1873.61	2911.67	1976.27	1616.02	3051.67	2750.73	2717.02	1876.13	4454.83	6517.28	3696.63	3114.09	2611.68	2714.42	3936.56	2446.6	1859.76	2963.18	5044.57	1224.53	3977.11	3765.84	2706.72
ATP5G1	516	666.304	1809.61	661.724	1091.16	856.516	625.43	2127.3	690.614	1134.21	932.692	1011.3	756.046	926.564	757.385	832.227	1375.61	1809.41	436.971	271.75	485.791	280.494	339.836	3089.86	1495.85	3424.91	1275.03	735.59	841.984	425.728	464.379	1121.74	1813.95	728.724	751.29	978.189	1323.2
ATP5G2	517	5762.11	8377.93	3452.53	4226.19	6604.68	7039.52	16898.7	3821.71	9933.83	14522.2	7914.42	6839.63	5814.27	7550.12	6417.91	7764.89	4940.43	8709.58	4777.13	5244.1	3547.22	9870.12	7974.65	6718.12	6433.06	6884.23	7764.21	5617.65	7833.5	4850.68	20037.7	12029.6	5960.75	4269.07	4756.79	4715.94
ATP5G3	518	2510.07	9968.55	2078.52	4466	3518.02	4018.9	5244.42	5844.78	2526.84	3542.07	4737.35	3035.21	4083.73	2999.03	7075.05	5926.67	3577.5	2511.8	2383.19	2685.92	1704.32	4836.24	16655.5	7251.59	7505.24	7373.86	3584.37	6468.86	2462.14	2667.65	2634.52	9597.38	2738.01	5945.02	3069.14	3541.82
ATP5H	10476	1989.11	3821.61	1517.44	2427.58	2799.43	2625.43	4737.66	2942.32	1929.46	4572.72	5159.85	1651.25	1864.69	2409.69	2952.18	2873.26	2285.5	2175.5	1799.12	1566.97	1580.92	2577.52	5604.84	4181.73	5286.38	4647.94	2801.73	3189.73	2082.52	1321.74	2685.89	5243.7	1992.02	2261	2380.25	2992.9
ATP5I	521	1168.65	2772.25	1304	1552.31	1717.24	1730.98	6113.12	1262.69	2061.85	4532.64	1240.39	982.189	1270.48	1689.99	1827.24	1268.8	1105.12	955.323	1661.74	829.844	754.789	2352.79	4302.34	1421.27	4744.73	2443.69	2123.07	2441.56	1433.84	1021.52	821.014	3665.51	1333.26	1554.63	925.107	1463.75
ATP5J2	9551	1051.17	2441.97	2405.74	2027.52	827.586	731.959	2723.38	889.355	1595.51	3388.22	2599.63	1139.16	1088.01	646.489	862.383	1537.63	1997.7	904.232	1217.75	1242.25	704.319	1037.99	3037.44	2935.03	3363.21	1834.34	1841.33	1596.89	619.903	649.906	939.657	2058.62	1458.1	1267.66	1579.01	2041.07
ATP5J	522	1082.79	3333.51	936.337	1413.11	1418.51	1417.9	4080.12	1744.49	1322.75	3049.77	1995.69	1177.95	2156.73	1489.07	875.323	2350.42	1619.43	676.183	823.749	1271.81	1084.86	1114.48	4805.24	3501.82	1515.38	1246.07	2281.28	2497.79	1093.22	1075.75	743.913	2104.09	1533.18	1630.28	961.856	1152.3
ATP5L	10632	3111.05	4888.51	2701.84	2692.46	2307.63	3372.85	5175.76	2656	5307.12	4624.4	2367.6	2189.22	2213.95	1485.23	1445.71	3321.49	2235.49	1763.92	1494.62	1690.64	1546.75	2740.76	6024.77	4501.71	5739.23	4243.16	2294.6	3708.77	2022.33	1754.07	1682.09	3260.66	2184.87	3423.21	2488.48	3045.24
ATP5L2	267020	0.5444	0.5718	0.4862	0	0	0.8591	0	1.0488	0.6242	1.2019	0.5382	2.5456	0.9252	0	0	1.0659	0	0	0.4888	0.3703	0	0.5133	0	0.4885	2.3283	0.474	0.5228	0	0.4854	0	0.5242	0	0.3258	0.7505	0.4115	0
ATP5O	539	2014.15	6281.88	1930.72	4916.75	2375.82	2535.22	10106.6	2989.51	3871.41	4832.93	4183.53	2483.24	2924.02	3467.31	2040.73	4212.62	1779.31	1548.78	1328.45	1913.91	2180.35	2118.58	12055.9	4933.56	4232.83	2990.88	3992.68	3891.58	1982.52	3029.71	1559.95	3583.33	2455.57	2990.15	1557.2	1826.75
ATP5S	27109	104.518	50.8862	133.22	82.8451	25.8298	48.9691	40.7109	66.5967	113.608	84.7356	102.799	47.0938	79.1026	27.6029	73.8157	95.4023	117.872	61.9154	49.3646	67.0184	76.8866	72.3819	18.4332	71.8124	109.43	115.18	59.6001	71.511	66.5049	54.5336	31.4507	80.9109	112.713	157.613	61.3169	35.8968
ATP5SL	55101	782.254	1420.24	819.74	569.56	789.875	926.976	1280.27	694.809	870.787	1527.64	1297.63	835.808	852.55	1123.97	1083.38	1453.95	902.666	945.212	787.879	1255.95	1067.87	1016.94	1345.62	1112.36	1655.41	3676.74	806.692	825.26	943.689	803.949	992.268	1005.81	1085.1	846.609	754.321	719.93
ATP6AP1	537	4689.17	3700.4	3594.02	4065.95	2633.09	4714.78	3855.39	3027.79	2682.27	2134.01	3272.87	3732.29	2658.03	9064.89	3168.67	3343.34	2906.49	3414.25	3746.33	5717.3	2919.79	5309.55	4489.06	4022.47	3722.93	3793.34	3255	3992.5	4045.63	3364.22	3170.23	2853.68	4001.95	4759.55	3787.24	3332.92
ATP6AP1L	92270	46.8155	70.8977	27.7136	19.0762	19.6306	47.2509	55.2939	84.4258	50.5618	51.0817	18.8375	36.4871	111.484	55.6901	47.7101	52.2314	61.2323	45.8797	35.6794	28.5106	29.4257	32.3409	60.4839	14.1671	65.1921	45.977	30.3228	31.1419	44.1748	25.8613	22.0155	62.5	34.5305	39.4033	40.3292	15.4556
ATP6AP2	10159	4050.08	3182.39	4146.83	2713.72	3116.1	3081.62	2552.03	3890.4	1700.37	2736.78	3032.83	2724.65	2666.36	3807.75	2808.15	3721.22	4027.55	2685.97	3343.6	3414.61	3981.49	3070.33	2534.56	2764.04	3746.22	3871.55	3576.53	5248.56	3177.67	2583.88	3382.52	3624.52	2942.91	3277.23	3670.37	3867.88
ATP6V0A1	535	1510.07	1844.48	1567.52	3050.01	2042.1	1348.8	3143.86	1959.62	1127.34	2868.99	1868.14	1663.13	1827.22	2284.26	2324.29	1459.82	784.794	917.595	2400.29	1498.47	1975.32	1327	1399.77	2747.44	2835.86	900.107	1572.08	1743.94	2263.59	1540.43	6285.94	1846.41	1998.86	3355.29	2253.91	1057.96
ATP6V0A2	23545	438.214	279.017	293.667	389.699	412.243	500.859	250.342	315.155	737.203	437.5	353.068	327.535	494.507	366.586	231.349	391.203	329.124	422.272	447.703	519.485	345.515	235.113	233.295	216.414	381.839	186.278	273.428	243.368	548.544	249.055	483.816	457.364	167.766	511.493	544.856	471.146
ATP6V0A4	50617	97.3598	0	2.9172	1.0901	0.5166	0	0.6076	0	0	0	0	0.8485	0	0.9685	0.9002	1.5989	112.509	0.8909	0.9775	1.1108	0	0	0	0	0	0	1.5684	0.5767	0	0	0	0.969	0	0	0	0
ATP6V0B	533	2653.78	3075.47	2472.35	2367.62	2735.37	2452.75	4986.78	1897.75	2714.73	3765.62	3148.55	1801.87	1264.72	3978.69	1969.17	1120.84	2415.1	2257.46	2824.54	5104.88	1084.01	5258.21	2470.62	4061.07	3835.86	1548.52	2316.56	1423.88	1366.5	1488.15	2619.84	2965.12	1933.71	2510.93	5290.53	3499.94
ATP6V0C	527	3671.37	4921.1	2931.4	6592.29	2757.07	4325.32	5888.63	3748.3	3105.59	6240.65	4360.69	3401.36	2432.8	2100.24	2207.72	2202.78	2148.91	2573.72	2443.79	2408.02	2710.01	2954.83	4378.55	4272.66	2968.57	3609.91	3239.32	4968.73	4361.26	3247.28	2568.15	2920.54	4020.8	2383.86	2891.08	4525.44
ATP6V0D1	9114	2510.07	2113.78	2437.83	2427.58	1531.19	1835.05	2565.4	2542.21	2392.63	1138.22	2906.35	1092.07	1825.84	1755.45	1465.06	1314.85	974.104	767.929	1639.78	2182.36	1139.06	1171.97	3233.87	4134.83	4703.14	2064.23	1699.65	1676.47	2171.84	879.284	1482.37	1442.35	1243.42	3132	1763.79	2544.19
ATP6V0D2	245972	23.9521	14.8656	23.824	0.545	1.0332	0	0	26.2192	45.568	6.0096	2.6911	1.2728	12.0273	0.4843	17.1036	12.7914	2.0411	2.2272	1.955	11.4783	2.373	4.6201	6.3364	9.2819	40.7451	0.948	2.614	1.1534	3.8835	24.7369	2.0967	276.163	0.9773	0	32.9218	28.9169
ATP6V0E1	8992	3504.63	4899.37	3887.69	1854.2	5191.27	3780.07	6623.12	4164.66	4421.35	2840.14	3210.98	2182.86	2720.48	2548.18	3255.54	2944.15	1489.48	3244.99	2325.02	4049.62	2112.48	5126.28	4590.44	6498.78	3834.69	3793.34	3088.75	4323.53	3260.68	2370.24	3558.64	2938.95	2683.93	2162.68	3355.97	4089.74
ATP6V0E2	155066	899.809	764.408	462.866	705.24	740.245	388.316	3140.82	703.686	1541.55	1549.26	1679.22	754.764	325.588	2330.74	1567.18	1548.08	227.07	885.483	1040.07	342.09	1274.73	2222.26	589.827	1812.38	3242.12	1003.23	1767	1254.87	1008.67	1282.92	966.059	2397	2090.38	1743.5	924.996	1201.5
ATP6V1A	523	1704.95	1659.23	1639.48	2726.8	1724.91	1168.38	606.41	2606.19	820.225	1370.19	1737.35	1988.12	2558.58	939.952	1604.14	1651.15	1453.25	1442.76	1601.17	1145.98	1832.94	1214.58	557.604	1879.82	4325.96	1891.69	1474.84	1951.56	1018.45	1781.06	699.253	1141.47	1536.28	2457.64	1205.35	1417.42
ATP6V1B1	525	240.065	6.8611	36.9515	7.6305	1.0332	112.543	153.729	24.646	13.1086	1.8029	2.6911	9.3339	9.7144	5.3269	4.501	27.7146	92.869	2.6726	76.7351	28.5106	3.3223	9.7536	5.7604	63.0191	13.9697	16.5896	147.954	4.6136	59.7087	24.1747	13.1044	22.7713	6.1894	2.2516	0.4115	10.4699
ATP6V1B2	526	1771.37	1860.49	2226.33	2215.02	1963.58	1174.4	1547.02	1364.45	1777.15	1409.86	850.377	1234.2	1914.65	1072.64	1912.91	1720.44	772.037	2014.7	1181.82	1679.9	1240.15	1381.93	1096.77	1814.85	2584.4	1596.87	1101.03	1313.15	1121.84	2070.59	1052.55	2305.72	1297.83	8460.08	1195.47	2557.15
ATP6V1C1	528	1418.07	1806.17	1196.06	1835.67	2824.74	1304.12	1073.07	1438.38	1038.08	1150.24	615.716	1035.21	3764.08	1976.76	2002.93	1864.34	990.943	1967.04	2039.59	2055.36	1470.81	1249.49	1415.32	1614.07	1018.63	1032.35	1159.59	2365.05	1261.16	1919.92	1811.03	1678.78	3125.99	2749.98	2944.03	1517.64
ATP6V1C2	245973	87.8661	32.4242	53.0351	52.4268	47.47	100.309	35.1937	67.3152	130.412	89.2188	69.9139	156.517	259.752	95.1429	98.1614	78.9174	366.955	167.822	213.778	74.135	43.8538	54.3583	56.3249	95.0855	115.448	55.7791	64.8124	56.2226	96.4078	152.188	352.436	140.906	29.6409	49.7157	119.889	47.7976
ATP6V1D	51382	1407.19	1157.8	1824.72	1085.16	915.924	1382.3	819.079	826.429	591.136	774.038	652.314	1160.37	896.033	665.375	663.441	1643.69	651.104	1020.49	672.532	1143.76	1012.34	721.253	1029.95	1434.29	2215.37	842.28	1183.11	2142.45	1186.41	1090.11	769.493	932.655	699.731	1303.69	926.749	1415.43
ATP6V1E1	529	2547.63	4049.74	2613.83	1740.84	2622.24	3548.11	5184.26	3380.7	2239.08	2546.27	2821.31	2028.43	1904.01	2784.5	2850.91	3758.53	2151.29	2255.68	2581.13	3158.01	1651.16	1654	5044.93	6885.2	3539	4740.37	2375.11	1920.99	2274.27	1901.37	2195.78	3277.62	3163.78	2399.1	2858.02	3410.2
ATP6V1E2	90423	33.7507	60.6061	35.0067	100.286	66.1242	52.4055	140.969	90.194	127.965	79.3269	92.5727	20.7891	90.2047	140.92	75.6161	48.5006	62.7631	54.343	65.0049	44.8024	42.2402	92.9158	137.673	106.986	31.4319	89.5841	107.698	55.3633	117.476	68.5886	134.19	121.124	27.038	94.568	99.5885	80.7678
ATP6V1F	9296	1759.24	2233.25	1450.8	1544.07	1674.27	1254.17	2256.7	1663.33	2415.09	2844.53	2389.07	1017.81	1287.36	1262.44	1725.59	1255.66	2005.75	1232.47	1438.18	1332.59	1105.81	2071.86	2635.35	3531.45	1416.73	2541.95	1898.62	2488.46	1014.98	1173.84	1238.09	1984.86	1470.43	1462.69	1653.33	2197.18
ATP6V1G1	9550	2095.81	2328.76	1879.66	1321.16	1575.62	2276.63	1836.24	1295.23	2426.34	912.26	2473.09	1728.89	1715.74	1119.61	805.671	1809.98	2901.9	1629.4	1119.75	2494.12	1017.56	2837.78	2233.29	1255.98	1951.11	2067.07	1259.97	1787.2	1020.39	919.2	883.239	1227.23	2294	1686.84	1377.37	1928.46
ATP6V1G2	534	26.1296	12.0069	15.5585	3.8152	7.7489	12.9553	7.8991	9.4389	126.017	18.0288	3.8913	8.0611	10.6395	19.8547	9.0019	10.1265	8.1643	10.6904	9.2473	3.7027	12.8144	21.5606	14.4009	4.8852	16.298	8.8115	14.236	8.9562	14.0777	6.4597	20.2437	33.9147	4.0264	13.0331	14.0658	8.4756
ATP6V1G3	127124	0	0	0	8.1755	0	0	0	0	1.2484	0	0	0	0	0	0	0	0	0	0	0	0	0	0	0	0	0	0	0	0	0	0	0	0	0	0	0
ATP6V1H	51606	1156.23	1580.33	951.015	1219.24	1287.36	983.677	1010.48	1115.36	725.343	516.827	612.486	763.258	1357.23	838.257	694.948	733.905	572.522	1104.68	628.055	1073.04	402.468	1182.75	1468.89	1327.8	605.355	1006.28	546.857	1008.07	771.359	645.97	941.947	1026.16	1275.67	1250.4	1009.88	1200.55
ATP7A	538	360.37	175.529	485.232	276.332	229.885	188.144	94.182	212.9	196.629	132.812	193.757	351.718	236.845	231.477	437.043	269.152	271.463	645.88	402.248	458.391	396.773	315.708	87.5576	153.884	189.756	256.428	244.674	245.675	361.165	612.8	318.176	239.826	342.699	460.456	300.411	129.627
ATP7B	540	137.725	340.194	329.646	9527.73	142.58	508.591	49.2177	262.716	23.7203	660.457	201.83	103.521	132.3	131.235	217.396	278.212	523.536	66.3697	134.897	1010.83	229.236	185.832	270.737	164.631	142.026	223.723	113.449	250.865	169.903	209.701	178.22	195.252	189.266	4826.34	215.638	97.7191
ATP8A1	10396	318.998	66.8954	447.794	87.2053	191.657	44.6735	58.3321	63.4504	1307.12	55.2885	23.1432	192.194	258.587	53.2688	217.396	70.8855	99.5025	65.9243	117.302	52.2077	259.611	19.5072	38.0184	23.4489	44.2375	25.5954	197.621	72.6644	45.6311	86.5791	66.5706	58.1395	40.3942	512.243	165.844	71.7936
ATP8A2	51761	7.0768	585.477	5.3482	4.3603	43.394	2.5773	2.4305	3.1463	8.1149	1.8029	136.706	2.9699	526.425	1.4528	5.8512	590.002	2.5513	7.5724	4.8876	10.3675	2.373	2.5667	55.8756	81.0943	1.1641	322.787	1.0456	5.1903	2.4272	26.4235	48.7485	52.8101	138.448	260.062	11.5226	25.9255
ATP8B1	5205	828.59	1497.25	1748.27	1795.8	887.863	1819.36	599.119	3480.56	76.829	1872.56	2942.17	629.949	715.61	2625.84	1809.24	848.217	2015.42	1695.45	1538.13	1779.32	1431.64	1432.67	535.645	1690.75	1192.08	1703.58	1073.52	1798.71	1423.04	1256.31	2291.94	218.004	4092.5	3095.98	1640.85	808.994
ATP8B2	57198	1077.84	326.472	553.3	207.113	396.745	1178.69	100.258	328.264	1960.05	110.577	260.495	458.634	568.984	157.869	581.974	166.288	96.9511	432.517	618.768	663.519	850.973	84.7023	130.76	151.93	270.082	227.041	524.899	245.098	751.456	401.412	184.511	195.252	251.812	739.281	441.152	1028.04
ATP8B3	148229	171.475	33.1618	94.3236	19.6212	64.0579	52.4055	23.6974	41.4263	85.5181	14.4231	51.6685	25.0318	118.423	70.2179	64.8138	379.477	199.515	111.359	27.8592	18.5134	23.7304	26.1807	148.042	81.0943	327.125	201.446	32.9369	24.7982	240.777	42.7274	287.249	448.643	52.4473	7.1301	37.037	62.8194
ATP8B4	79895	102.885	38.3076	63.6927	49.053	86.2715	65.2921	40.1033	59.7798	55.5556	12.6202	78.0409	8.9096	83.7285	13.5593	24.7553	21.319	11.2259	58.7973	68.915	44.0618	87.328	32.8542	25.3456	50.3175	13.9697	91.006	48.6211	48.4429	21.3592	44.9762	70.2398	11.6279	5.8637	21.0151	35.3909	69.7993
ATP8B5P	158381	29.3958	34.3053	45.217	49.053	52.6928	79.8969	159.198	37.2313	81.7728	66.7067	45.2099	50.0636	45.7962	63.4383	44.1094	65.5558	41.8421	24.4989	23.4604	17.4026	36.5449	79.0554	70.2765	86.468	91.9674	30.3353	38.6878	84.1984	65.534	44.414	38.7891	78.4884	43.0002	27.3947	50.2058	40.8825
ATP9A	10079	3284.7	1396.23	2333.78	820.275	3473.59	4823.88	3419.11	2071.84	193.508	4194.71	1160.39	2255.41	2304.15	2851.33	3165.97	956.155	3583.11	2272.61	2735.58	4236.6	4061.22	2304.93	744.816	1844.65	1142.03	690.129	2002.35	2437.14	2789.81	2855.42	4627.44	1263.57	4278.52	2250.87	2636.63	952.761
ATP9B	374868	290.691	253.859	380.212	280.692	370.916	328.179	298.344	277.399	455.68	275.841	263.186	266.016	306.696	526.392	239.451	655.558	261.768	699.777	512.708	389.521	602.753	462.526	344.47	429.409	504.075	212.821	321.527	318.339	387.864	535.779	351.199	219.961	602.981	1791.91	351.44	388.882
ATPAF1	64756	777.131	746.712	653.458	1213.23	1202.28	623.608	1601.09	976.188	792.135	1272.84	1162.99	1101.97	1615.33	886.286	1092.24	972.629	466.896	1177.4	1248.63	752.628	827.057	1151.4	1043.16	1396.67	2117.57	698.149	1186.06	728.945	520.874	785.795	1585.92	1586.33	475.153	1879.69	869.749	944.275
ATPAF2	91647	229.178	301.887	280.54	345.006	170.993	170.103	376.12	205.559	633.583	705.649	194.295	266.44	157.743	252.785	313.717	187.074	399.541	252.606	328.935	122.929	205.031	436.858	426.267	187.592	555.297	222.941	380.604	403.114	248.544	248.493	302.45	254.361	258.653	655.971	265.021	367.444
ATPBD4	89978	99.0746	128.645	87.0305	149.884	81.6221	162.371	58.9397	103.828	69.9126	113.582	142.088	135.341	176.709	86.1985	188.14	224.382	233.703	151.893	48.3871	55.9104	79.2596	120.637	82.3733	40.0586	89.6391	261.168	67.4422	85.9285	87.8641	70.2753	125.278	166.667	133.236	158.364	161.317	43.3753
ATPIF1	93974	1124.12	1206.4	1568.49	2910.48	777.476	2314.43	2964	987.939	2631.09	2162.26	1283.64	1083.58	1100.5	1879.9	924.947	757.356	1272.1	696.659	891.984	1228.92	873.754	696.099	1640.55	4473.38	3461	682.071	1651.03	2305.07	781.068	877.597	1317.78	1307.17	886.717	2105.64	1258.85	2028.67
ATR	545	618.944	743.854	624.772	1055.18	792.974	572.165	374.297	617.2	751.561	606.971	797.094	612.643	1650.51	312.833	744.908	1211.98	1107.28	953.675	934.506	617.236	793.071	446.612	557.604	650.22	643.772	778.291	650.372	518.454	444.175	807.322	479.098	1312.98	619.269	693.123	552.675	663.094
ATRIP	84126	162.64	103.922	211.956	114.135	175.074	42.0103	226.45	78.6418	425.337	204.165	146.712	182.592	110.545	172.213	92.6612	68.4605	108.575	120.361	199.184	96.4473	129.938	87.1561	161.866	171.969	85.8091	121.123	197.6	100.069	144.383	113.852	151.503	95.0824	207.87	201.49	139.387	311.903
ATRN	8455	2406.64	2129.79	1244.68	739.61	3605.32	1349.66	1214.04	1601.47	449.438	999.399	2533.91	4080.61	7499.48	2282.81	2316.64	2434.62	1377.22	2481.07	4186.71	8133.67	4131.47	3535.42	1749.42	7791.4	6300.35	1009.12	1999.22	1407.15	1639.81	2775.03	3736.86	1046.03	2699.24	9994.56	2989.71	1499.69
ATRNL1	26033	25.5852	35.4488	40.3549	7.0854	31.5123	4.2955	0.6076	40.3776	41.1985	1.2019	8.6114	8.9096	7.864	12.1065	1.3503	6.9287	1.5308	11.1359	12.7077	10.3675	10.4414	11.807	34.5622	0.4885	10.4773	3.7919	18.2983	7.4971	24.7573	13.4928	6.8143	155.523	13.3561	6.7549	11.5226	4.9857
ATRX	546	1364.73	1480.27	1396.86	1300.99	1662.4	1864.26	661.704	1205.03	890.761	469.351	876.749	1856.17	1499.71	1312.35	1618.99	1975.2	1508.87	1959.47	1588.95	1758.77	1988.61	1039.01	560.484	694.187	748.545	925.228	979.218	1072.66	1653.4	1499.39	1766.48	1448.64	1557.78	2164.56	1421.4	604.761
ATXN10	25814	2029.94	3120.64	1882.1	1840.03	1965.65	1807.56	1286.34	2328.79	1411.98	1753.61	2719.05	2504.45	1687.06	2242.61	1989.87	2305.11	3023.86	1876.17	2730.69	2912.52	1911.72	2493.33	2683.18	3331.22	2086.15	1640.95	2184.81	2532.87	1983.5	2159.42	1718.25	945.252	2341.88	2578.1	2227.57	2025.68
ATXN1	6310	1331.52	699.257	997.204	367.897	410.693	452.749	419.262	582.066	795.88	326.322	229.279	763.258	863.189	727.845	791.718	278.745	707.743	918.04	600.684	1106.36	1220.69	591.889	385.945	221.788	975.553	514.753	565.678	529.412	603.398	802.824	860.7	455.911	552.814	1597.52	497.942	775.77
ATXN1L	342371	1095.25	1070.14	993.315	1498.05	1163.25	1390.03	551.116	1203.99	683.521	892.428	650.5	1179.47	1920.2	1618.91	1398.95	1148.56	898.666	845.88	1626.75	1338.97	2227.81	352.669	594.188	453.346	757.858	1423.41	853.222	891.004	1352.91	662.274	1537.41	797.481	1274.05	1665.38	1077.78	583.323
ATXN2	6311	823.625	1133.22	568.372	1066.63	1120.5	538.66	605.195	712.638	584.27	1207.33	893.434	895.206	1133.34	883.777	414.088	1316.98	731.216	1293.1	1113.88	1454.04	929.283	959.959	603.687	730.826	501.746	463.562	489.348	1047.29	1087.86	1085.61	966.584	1051.36	451.828	1000.84	981.07	996.136
ATXN2L	11273	2749.05	3101.77	2573.96	4604.44	3261.78	4167.53	2644.39	4250.66	5109.86	3355.77	3749.73	4436.15	4814.62	4097.82	3111.51	3423.82	3694.35	2871.27	3364.13	3556.05	3290.46	3342.4	2653.8	3052.27	1458.67	3555.87	2908.38	2693.77	4645.63	3066.81	3629.93	4625.48	2698.59	2121.4	3205.35	3499.44
ATXN3	4287	353.838	204.688	538.228	390.244	246.416	216.495	187.149	176.193	368.914	167.668	122.174	491.727	256.274	268.765	238.551	310.724	351.065	312.249	343.597	307.692	589.938	156.571	145.161	194.919	339.93	189.596	182.983	342.561	397.573	490.802	167.737	121.124	187.963	542.64	265.432	311.106
ATXN3L	92552	0	0	0	0	0	0	0	0	0	0	0	0	0	0	0	0	0	0	0	0	0	0	0	0	0	0	0	0	0	0	0	0	0	0	0	0
ATXN7	6314	425.694	366.495	559.621	564.11	513.496	363.402	133.678	396.434	768.414	209.135	273.95	782.35	634.671	277.482	501.406	542.034	338.308	309.577	494.135	508.377	731.372	246.92	130.184	200.293	274.738	433.701	335.12	475.779	274.272	424.462	447.648	271.802	445.965	782.437	507.407	355.478
ATXN7L1	222255	167.12	165.237	105.993	201.117	101.253	202.749	68.0541	144.206	254.682	146.635	153.929	101.824	169.77	65.3753	363.227	232.377	412.298	217.817	263.441	139.221	215.947	99.076	75.4608	118.222	271.246	156.891	152.137	164.36	154.369	154.043	252.654	130.814	100.334	474.716	231.276	83.2606
ATXN7L2	127002	84.9211	54.3168	64.1789	87.7504	75.423	156.357	239.405	50.3408	310.861	432.091	104.413	88.672	98.5313	231.961	74.7159	63.9569	101.544	127.84	252.688	105.897	144.281	285.934	99.6544	87.9336	48.8941	41.2371	164.684	96.3091	183.01	215.886	138.383	46.0271	47.2351	113.332	137.86	64.3151
ATXN7L3	56970	1793.69	1369.93	1735.26	1963.76	1737.31	1237.97	864.044	1236.5	1810.24	1240.38	1787.94	1292.74	1342.43	1739.95	1183.3	1294.59	3575.97	1238.75	1441.35	1911.69	1234.46	1283.37	1570.28	1250.12	1018.63	1228.11	1021.04	1237.6	1824.27	1543.81	1840.91	1881.78	1370.14	1268.04	1504.94	1312.23
ATXN7L3B	552889	3382.14	3020.01	1921.48	3100.15	2899.65	3012.03	1324.62	1835.34	2088.01	3259.01	1468.78	2652.1	2685.79	2530.27	2332.4	2077	2625.33	3666.37	3516.13	2993.24	3062.65	2782.85	2092.74	1256.47	1197.9	1895.49	2446.74	2521.34	2628.16	2781.21	2330.49	2419.09	3929.31	2231.35	2433.74	1313.72
ATXN8OS	6315	0	0	0	0	0	0	0	0	0	0	0	0	0	0	0	0	0	0	0	0	0	0	0	0	0	0	0	0	0	0	0	0	0	0	0	0
AUH	549	179.641	462.55	258.661	205.478	171.51	239.691	284.369	174.095	132.959	179.688	233.046	218.498	290.043	196.126	257.905	110.326	157.673	235.635	179.863	149.588	129.568	186.858	474.654	89.8876	508.731	457.874	217.488	345.444	215.534	86.0169	217.01	144.38	261.259	613.566	263.375	207.902
AUP1	550	2475.36	4334.91	2751.92	3477.64	3302.97	3000.44	5516.95	5478.99	5228.09	4877.49	4612.29	2331.77	4384.93	4019.61	2635.81	3743.12	5558.07	2295.94	2537.19	2829.32	2341.86	3235.74	6066.5	3880.65	4139.88	3185.21	3295.15	2493.78	4247.9	3124.3	3550.94	4250.22	3289.48	1781.32	3765.86	2944.12
AURKA	6790	197.605	217.839	198.857	735.25	423.092	109.106	79.599	254.326	204.12	439.904	343.38	101.4	121.661	245.521	255.654	462.088	681.209	98.441	384.164	189.207	107.736	201.745	359.447	361.505	598.37	370.66	190.302	298.731	205.825	103.445	232.211	391.957	130.63	43.156	244.856	935.311
AURKAIP1	54998	1235.71	1397.37	1429.44	2223.19	2119.08	974.227	4166.49	1839.54	2230.34	2309.5	1609.26	578.278	982.537	1888.62	1014.52	656.624	1680.32	1177.73	868.524	1719.15	705.268	1376.8	2384.79	1632.14	3515.72	1467	1631.68	1472.89	1344.17	731.987	900.537	1556.2	641.746	1149.83	869.136	1572.48
AURKAPS1	6791	4.8993	18.8679	6.8069	10.9007	23.7634	13.7457	8.5068	9.9633	22.4719	24.6394	24.7578	14.4251	24.5172	12.1065	9.9021	31.4455	45.9242	7.1269	8.7977	14.8107	7.5937	18.9938	5.7604	13.19	22.1187	13.7457	14.6386	9.2272	25.2427	55.658	11.0077	13.5659	33.5532	4.8785	23.0453	16.4527
AURKB	9212	84.9211	133.219	82.6547	476.359	159.628	31.7869	26.1279	110.121	428.215	824.519	267.492	70.0042	56.4358	420.823	161.134	156.694	659.268	63.2517	409.58	190.688	101.566	218.173	267.857	116.756	192.084	140.301	202.327	158.016	184.466	110.754	168.785	147.771	79.1595	12.7592	88.0658	840.583
AURKC	6795	20.6859	2.287	11.6689	14.1709	18.0808	21.4777	17.6211	10.4877	53.0587	16.226	17.2228	2.9699	10.6395	25.1816	17.1036	7.9946	3.5719	2.6726	28.8368	11.4783	7.5937	24.1273	13.8249	8.7934	173.458	5.6879	19.8667	9.2272	8.2524	2.811	10.4836	0.4845	8.144	16.5119	6.1728	21.9369
AUTS2	26053	991.835	515.723	594.627	47.4179	577.037	388.316	129.424	631.358	303.995	79.3269	323.466	271.107	322.887	68.7651	207.494	394.401	92.869	301.114	476.54	719.8	214.048	328.542	195.276	128.481	436.554	121.341	234.218	143.022	101.942	427.274	582.886	256.298	217.933	595.928	163.786	426.274
AVEN	57099	168.753	165.809	242.13	207.113	176.676	94.5017	186.541	188.254	214.107	220.553	226.049	101.824	138.776	160.775	279.509	90.6055	292.894	234.298	183.773	158.475	154.248	219.199	299.539	139.717	254.948	300.036	166.253	258.939	187.379	202.955	84.9168	162.306	148.22	400.413	250.206	262.246
AVIL	10677	45.7267	11.4351	54.941	35.4272	30.9957	8.5911	7.2915	4.1951	25.593	27.6442	33.9074	8.9096	30.5308	78.4504	57.6122	18.1211	83.1739	81.9599	67.9374	95.8993	56.953	20.5339	5.1843	18.0752	34.9243	19.9076	37.1193	20.1845	57.767	15.7417	209.147	31.0078	7.8182	61.9195	112.757	15.9541
AVL9	23080	318.998	187.536	333.05	340.646	222.653	222.509	57.1168	345.569	127.965	110.577	195.91	200.255	239.158	122.034	353.325	295.8	511.29	335.412	253.177	379.154	230.185	140.144	59.3318	189.057	157.16	271.596	153.183	147.059	144.66	178.218	301.926	453.004	213.698	216.531	282.305	155.553
AVP	551	0	0	0	0	0	0	0	0	1.8727	0	5.9203	0	0	0	0	0	0	0	0	0	0	0	0	0	1.1641	0	0	0	0	0	0	0	0	0	0	0
AVPI1	60370	417.529	151.515	338.884	204.387	154.462	213.058	215.1	288.935	116.729	196.514	255.113	540.093	115.647	249.879	312.366	248.899	746.014	179.51	169.111	167.731	329.378	263.347	169.931	440.156	407.45	435.123	585.022	698.385	318.932	187.213	169.834	107.074	293.183	190.262	345.267	163.53
AVPR1A	552	8.1655	4.0023	6.8069	14.7159	11.3651	0	0	30.4143	0	1.8029	2.1529	2.1213	0	17.4334	9.452	3.1978	0	4.8998	1.955	12.9594	48.4101	0	0	0	1.1641	0.948	6.2737	4.0369	1.9417	5.0598	0	7.2674	2.6061	619.57	30.4527	1.4957
AVPR1B	553	0	0	0.4862	3.8152	1.0332	3.4364	2.4305	1.5732	0	0	0	16.9707	2.3129	0.9685	0	0	1.0205	3.118	3.4213	1.8513	20.4082	0	0	0	6.9849	0	0	0	0.9709	1.6866	1.0484	0.4845	16.9395	15.3861	5.7613	0
AVPR2	554	72.945	2.287	25.2826	3.8152	4.6494	1.7182	33.4194	1.0488	60.5493	0.601	1.0764	8.0611	3.2381	2.9056	0.9002	6.9287	0.5103	0.4454	13.6852	2.5919	2.373	0.5133	1.7281	3.4196	0	0.948	4.7053	0	0.4854	7.3086	3.1451	2.907	1.6288	4.8785	4.5267	1.4957
AWAT1	158833	0	0	0	0	0	0	0	0	0	0	0	0	0	0	0	0	0	0	0	0	0	0	0	0	0	0	0	0	0	0	0	0	0	0.3753	0	0
AWAT2	158835	0	0.5718	0	0.545	1.0332	0	0	0.5244	0	0	0	0.4243	0	0	0.4501	3.1978	0	0	0.4888	0	0	1.54	0.576	0	0	0	1.5684	0	0.4854	4.4976	0	1.4535	0	0.7505	0	0.4986
AXIN1	8312	1096.9	1196.68	985.535	1485.76	943.82	1265.46	1573.75	1332.46	1506.24	1267.43	1585.58	1623.25	929.34	601.453	1360.64	1178.4	1796.15	986.637	914.956	747.2	896.535	1340.86	1634.22	941.866	568.102	1229.53	1024.18	1019.03	1569.9	1716.96	972.874	1208.82	1273.07	793.32	1209.88	1055.96
AXIN2	8313	923.789	103.488	275.678	10.3556	120.883	33.5052	23.6974	48.2433	107.366	9.6154	14.5318	64.913	167.919	70.2179	47.26	30.9125	8332.71	107.795	383.675	184.763	143.332	39.0144	27.6498	7.3278	15.1339	90.5321	101.948	40.3691	51.4563	44.414	201.284	32.9457	473.003	722.769	88.4774	122.647
AXL	558	2053.35	639.794	2529.23	521.597	995.48	325.601	478.201	497.116	247.191	82.3317	398.816	546.457	832.659	407.748	383.481	648.629	142.365	910.468	876.833	521.337	832.463	319.302	550.691	354.177	69.8487	1051.78	455.365	290.081	1287.86	731.425	928.319	462.694	610.147	452.951	777.366	3834.48
AZGP1	563	703.321	729.56	253.312	1032.29	132.249	674.399	1065.78	3888.31	4.3695	4310.1	2571.04	2703.86	212.791	2208.23	1000.56	868.214	227.07	2891.76	1422.78	2488.2	6107.74	1360.88	1312.21	1395.21	20721.8	1751.87	8043.39	5136.68	893.204	2928.51	223.824	772.287	2674.48	13791.5	2701.23	584.32
AZI1	22994	433.315	337.336	383.129	463.823	437.557	281.787	628.285	398.532	993.758	1200.12	564.047	458.634	290.043	700.726	486.553	289.405	700.6	315.813	641.251	183.653	295.207	491.273	448.157	534.929	266.589	346.961	575.611	337.947	539.806	364.307	458.131	589.632	403.29	287.081	515.226	613.736
AZI2	64343	705.498	434.534	829.95	426.761	532.61	457.904	253.38	1019.4	474.407	371.394	403.66	915.995	485.718	420.823	561.269	410.923	463.835	557.238	522.972	490.604	574.276	358.83	327.765	363.947	580.908	510.961	444.386	545.559	600	726.365	493.251	552.81	655.754	1192.23	579.012	948.772
AZIN1	51582	3395.75	2147.51	2699.89	4386.43	3146.58	2671.82	1420.02	2736.23	1295.88	928.486	1797.63	2829.02	2332.83	3763.68	2910.32	2316.3	2969.26	3030.74	3333.82	3324.26	3101.09	1624.23	1219.47	1670.25	2015.13	2561.91	1957.91	1617.07	2578.16	3987.7	2455.25	2750.97	6999.27	11951.6	5648.15	3044.25
AZU1	566	1.6331	1.7153	9.2379	0	0.5166	0	0	0.5244	0	0.601	0.5382	0	0.4626	0	0.4501	0.533	1.5308	0	0	0.7405	1.4238	1.54	0	0	11.6414	0.474	0	0.5767	0	0	0	0.4845	0.6515	0	0.823	0.9971
B2M	567	59641.3	36529.4	73543.2	128766	88221.6	78313.6	33163	41924	99290.3	11483.8	48100.1	31176.5	83378.7	25736.6	54616.9	108626	9957.9	24177.7	37547.4	20844.2	24087.3	24599.6	67912.4	94529.6	87140.9	52461.2	53595.6	52591.7	49024.3	17199.4	38268.6	49900.7	31493.4	13883.5	43537.9	85248.4
B3GALNT1	8706	387.044	46.3122	461.408	378.798	133.798	43.8144	55.2939	40.9019	120.474	34.8558	218.514	174.798	103.157	110.896	44.1094	150.299	90.3176	157.238	205.767	125.891	193.64	218.686	59.9078	149.487	108.265	126.555	122.86	131.488	67.9612	276.603	91.2069	270.833	114.667	274.697	101.646	510.034
B3GALNT2	148789	521.535	675.46	395.571	422.924	530.637	173.72	304.852	772.449	271.461	533.54	538.283	1776.93	819.248	1282.81	586.565	1516.55	1648.24	653.163	1089.97	708.333	1180.81	854.009	683.848	498.163	889.965	524.309	739.344	581.107	761.048	1410.09	762.804	769.927	1054.07	1007.63	1247.59	538.906
B3GALT1	8708	3.8106	0	0	0.545	2.0664	125.43	1.2153	3.1463	0	21.6346	4.3057	0.4243	0	11.138	18.904	0.533	6.1232	0.4454	0.4888	25.1782	5.2207	0	1.1521	0.4885	0	0.474	6.7965	0.5767	4.8544	0	5.2418	3.876	1.303	0	24.2798	1.9943
B3GALT2	8707	20.1415	10.2916	17.9895	403.325	12.3983	370.275	917.515	15.2071	14.3571	173.077	1150.7	9.7582	92.5176	3414.53	92.7197	6.3957	8.1643	97.5501	56.2072	8.8864	349.786	86.7556	278.802	1.4656	5.8207	3.3179	61.6913	407.151	728.641	14.6173	15.2012	12.5969	4.5606	75.4292	797.119	30.4126
B3GALT4	8705	573.217	81.1893	598.517	329.745	203.539	403.78	371.259	188.254	631.086	265.625	51.6685	174.798	194.75	309.927	178.238	383.208	356.168	257.016	211.144	129.964	157.095	327.002	441.244	342.941	259.604	147.885	218.011	119.377	214.563	260.3	310.313	480.62	392.214	278.075	172.839	271.719
B3GALT5	10317	44.638	19.4397	208.095	1405.64	147.23	14.6048	10.9373	64.4992	0	67.9087	31.2164	109.461	71.2386	75.0605	167.436	112.99	0.5103	51.6704	199.413	21.4755	68.8182	21.5606	72.0046	70.3468	1.1641	1.422	81.558	100.923	143.204	647.657	130.52	10.6589	69.061	11.6334	136.625	37.3925
B3GALT6	126792	747.959	539.165	607.755	467.639	719.618	299.828	1351.36	664.394	919.476	704.327	372.443	327.111	512.548	724.939	254.754	363.488	563.847	608.463	326.491	872.721	367.822	481.006	614.055	347.826	256.112	511.435	440.204	493.08	564.563	353.625	337.046	461.725	541.086	370.391	487.654	589.306
B3GALTL	145173	316.276	292.167	395.284	301.949	221.103	262.887	152.514	256.948	185.393	147.236	199.139	218.922	293.281	168.523	268.707	365.087	130.119	325.613	196.97	432.102	180.826	229.98	429.147	146.556	330.617	559.308	189.256	233.564	482.039	272.106	459.704	394.864	175.91	305.094	144.444	213.387
B3GAT1	27087	80.5661	207.547	10.6965	4.3603	102.286	84.1924	173.781	558.993	69.2884	123.798	438.106	98.8545	55.048	202.906	6.3013	451.962	9.1848	277.951	20.5279	56.2807	24.205	250	95.0461	16.6097	158.324	11.3758	36.5965	111.88	9.2233	151.794	233.259	10.6589	380.487	2036.21	251.029	63.318
B3GAT2	135152	12.7926	4.1681	7.648	13.3424	5.9254	12.6203	3.1657	4.3734	11.0799	2.506	7.1744	6.4616	22.9305	5.5496	10.7978	5.0366	23.952	4.6414	9.7996	8.4421	5.4248	4.8152	4.2627	1.0112	23.2945	7.3042	13.7917	4.827	10.568	13.7065	5.4934	3.9729	9.7826	10.8003	9.4321	1.5555
B3GAT3	26229	1237.34	1083.48	1470.28	777.763	730.983	1076.46	1779.13	1078.13	2413.23	1355.17	3201.83	686.89	642.072	1226.63	1090.58	544.166	890.42	639.198	484.849	524.299	466.54	1450.21	1755.76	1252.08	1691.5	1343.29	727.225	745.098	878.641	619.547	1129.08	1411.82	699.08	761.798	1080.66	2048.61
B3GNT1	11041	564.507	804.46	340.343	450.743	349.735	681.271	768.039	795.49	366.417	1036.06	525.834	613.916	350.179	669.734	759.311	359.757	244.929	630.289	340.176	243.266	801.614	725.873	615.207	1165.61	809.08	437.967	644.622	1815.46	713.592	476.185	691.39	657.461	467.465	633.455	575.72	907.391
B3GNT2	10678	919.978	839.337	1023.95	780.488	521.762	311.856	221.783	574.2	400.125	362.38	463.94	361.901	979.299	495.399	1011.82	529.243	706.212	441.425	764.907	844.951	680.114	375.77	336.406	608.696	615.832	374.452	548.948	444.06	410.194	604.929	674.617	395.833	358.987	1080.4	636.214	680.045
B3GNT3	10331	2570.5	2979.42	5108.06	1852.02	1584.4	4209.62	1897.01	4486.63	20.5993	3635.82	8665.23	565.549	1568.64	2192.25	4357.83	1747.09	333.206	1083.3	1038.12	71.4616	1935.93	1849.08	5860.6	3217.88	1278.23	2833.04	2000.26	3485.58	1779.13	2215.08	2927.01	597.868	1869.86	374.894	1916.05	709.46
B3GNT4	79369	37.5612	39.4511	7.2931	6.5404	8.7821	0.8591	6.0763	56.1091	1.2484	42.0673	0.5382	23.759	1.8504	35.8354	19.8042	10.6595	5.613	7.1269	6.8426	6.6648	18.9843	3.0801	0.576	6.3508	17.4622	30.3353	5.2281	58.2468	14.5631	51.7226	3.6692	12.1124	18.894	1.5011	5.3498	4.4871
B3GNT5	84002	731.628	191.538	2032.33	1420.36	584.27	869.416	148.261	296.801	30.5868	332.332	300.861	308.019	226.668	129.782	482.953	1033.97	925.628	434.298	669.111	354.346	497.864	327.515	138.249	527.113	844.005	746.06	307.411	396.771	167.961	533.53	369.021	533.43	242.365	854.864	459.259	786.24
B3GNT6	192134	68.5901	1.1435	194.968	1.6351	0	0	0	0	0	1.2019	0	0.4243	0	0	0	0	3.0616	0	0.4888	0.3703	1.8984	0	0	0	0	0	0	0	0	0	1.0484	0.4845	0	0	0.4115	0
B3GNT7	93010	683.723	845.054	2081.44	879.684	121.917	548.11	473.34	54.5359	134.832	2103.37	72.1206	656.343	3082.22	514.77	3798.36	312.856	431.688	66.8151	782.502	222.531	1531.56	946.612	3288.59	40.5471	15.1339	574.476	1956.87	42.6759	2013.11	125.933	2279.65	44.5736	3140.65	157.238	680.658	323.57
B3GNT8	374907	86.0098	86.9068	158.502	51.7782	24.7966	133.161	255.203	18.3534	26.2172	75.7212	11.3025	243.106	24.0546	311.864	152.132	150.832	128.078	93.0958	86.5103	458.762	35.5956	147.331	46.0829	46.4094	5.8207	123.237	33.4597	14.4175	103.883	114.127	85.441	137.112	128.349	7.8807	130.864	59.828
B3GNT9	84752	456.652	211.704	576.57	259.714	297.931	198.411	162.783	684.436	252.672	271.184	176.184	235.095	222.593	565.002	161.247	864.595	119.617	194.704	174.247	532.149	277.641	97.8901	276.152	251.988	214.994	295.39	255.737	355.952	509.146	104.676	317.08	149.642	203.45	173.435	214.926	633.529
B3GNTL1	146712	144.366	77.0955	98.3153	49.827	133.623	65.0515	155.85	130.419	274.663	125.331	173.348	195.91	116.586	332.218	197.857	172.417	208.384	145.051	202.331	131.375	57.589	193.183	90.6624	114.944	237.276	76.2934	94.1995	71.6897	100.267	137.402	163.276	539.099	88.89	58.7372	211.235	279.581
B4GALNT1	2583	511.334	89.5254	45.0906	37.4438	97.3989	3.677	11.9885	43.9591	62.422	95.625	10.409	12.4989	45.972	63.7772	92.5892	18.4516	12.7567	49.3185	83.6999	42.5474	7.5937	18.7628	27.5922	27.3571	158.324	138.244	11.7318	27.2953	237.495	39.3541	97.2192	135.344	29.8819	17.1198	34.4568	26.9226
B4GALNT2	124872	64.2352	9.7198	3.4034	103.556	111.068	43.8144	126.386	84.9502	0	45.0721	124.327	53.8821	6.4762	310.412	666.592	3.1978	1.0205	63.2517	14.6628	14.0702	90.6502	10.7803	3.4562	24.9145	3.4924	272.544	406.744	0	607.767	20.8015	206.526	67.8295	201.645	25.8936	302.058	9.9713
B4GALNT3	283358	655.961	161.235	3283.34	138.983	144.13	207.904	57.1168	126.901	8.7391	26.4423	217.976	299.958	51.3473	583.535	617.981	190.272	271.463	743.875	636.364	443.21	118.177	504.107	39.1705	54.2257	2.3283	192.914	418.246	13.2641	194.175	796.64	189.228	132.752	3473.9	1184.73	292.181	197.931
B4GALNT4	338707	516.059	693.539	26.255	427.306	760.945	2232.82	1938.33	664.919	156.679	2353.97	2169.54	1400.93	628.195	962.712	615.731	447.165	515.372	2109.13	3556.21	2628.53	63.1229	1996.92	1354.26	832.926	100.116	1014.81	690.106	361.015	720.874	4503.24	318.7	184.593	1147.32	461.957	897.942	30.4126
B4GALT1	2683	4600.98	4934.25	6216.6	10770.9	4416.89	2985.4	3304.88	7138.44	2333.96	3497	7707.75	5526.52	2588.64	3431.96	2343.2	5879.77	4799.59	4703.79	2333.33	5960.57	7469.39	3445.07	4392.86	2796.78	5854.48	9949.99	3125.34	4263.55	2253.88	5016.53	4406.76	3103.2	8573.01	9886.48	2946.5	4252.27
B4GALT2	8704	1161.68	1149.23	1435.76	780.488	1499.68	904.639	2585.45	962.769	368.29	2340.14	1476.86	848.112	452.411	1294.92	1354.79	343.768	1100.65	722.494	1515.15	1518.47	632.178	2162.22	1121.54	1663.41	951.106	952.245	1095.28	486.736	743.204	594.81	1490.76	1421.51	1053.83	949.432	1759.67	2013.21
B4GALT3	8703	1002.72	1013.72	864.471	729.8	654.527	1692.44	905.362	706.345	1209.74	1102.76	984.93	2865.08	995.952	1726.88	1154.95	1323.37	1694.09	970.601	1947.21	1041.56	988.609	2070.33	941.244	791.891	1118.74	897.737	1035.16	814.879	686.408	1510.04	983.881	826.55	2903.82	484.473	1237.04	1135.24
B4GALT4	8702	758.846	534.591	1871.4	3808.15	670.024	8304.12	857.36	3291.56	509.363	2186.9	1556.51	478.999	272.927	353.995	703.5	605.991	853.68	569.711	967.253	876.793	490.745	472.793	212.558	668.295	509.895	556.938	1193.05	5926.76	1057.77	552.082	356.441	477.229	1115.4	974.2	470.782	725.913
B4GALT5	9334	4077.84	2900.51	2726.15	6113.64	7515.43	5451.89	2245.78	3819.61	450.062	4548.08	2497.31	1886.72	4108.71	2837.77	2656.46	1479.54	3096.82	2634.74	2035.19	6217.16	3520.65	2727.93	1793.78	6147.53	807.916	4591.07	1956.87	3085.93	3668.93	2243.19	6114.53	3672	4459.32	1083.4	3090.95	2088.5
B4GALT6	9331	95.264	43.4534	148.778	89.9305	96.0868	58.4192	32.2042	114.316	53.0587	45.6731	57.0506	11.4552	39.7826	168.523	135.929	67.1547	76.0301	169.265	134.897	48.8753	67.869	150.924	38.5945	103.566	95.4598	66.3586	93.5825	54.7866	220.388	115.814	147.294	114.341	58.3109	606.811	171.193	272.217
B4GALT7	11285	724.551	532.304	964.143	579.37	744.414	606.529	926.629	870.477	963.171	1105.17	455.866	444.209	456.112	548.184	763.362	446.632	562.317	488.196	491.691	850.505	488.847	856.776	866.359	1110.89	448.196	577.794	489.871	758.939	777.67	492.489	440.833	826.066	430.002	290.084	441.564	844.073
B9D1	27077	126.777	202.773	147.218	161.886	136.975	291.297	603.372	336.707	69.3321	497.115	113.563	80.1867	97.6061	176.547	339.116	251.244	338.063	146.993	68.8319	192.724	154.404	230.072	604.263	149.487	64.4936	91.954	247.095	357.353	333.743	127.654	143.829	248.246	156.211	45.0511	190.272	195.862
B9D2	80776	126.554	210.783	138.082	93.2007	155.495	111.684	794.774	59.7798	129.214	383.81	84.4995	97.5817	140.164	152.034	175.087	171.058	70.9274	256.548	162.742	128.853	148.552	293.121	399.153	194.915	152.503	428.961	271.849	140.715	165.048	299.091	225.921	214.632	53.0988	81.0583	130.041	126.636
BAALC	79870	94.7197	24.5855	48.1342	16.351	17.5643	6.0137	648.337	26.2192	73.0337	18.6298	27.4489	28.426	11.1021	141.404	21.1545	44.7698	10.2054	22.7171	1513.2	40.7294	20.4082	695.585	60.4839	2.9311	9.3132	22.7515	277.088	16.7243	37.3786	30.3589	9.9594	8.2364	1122.89	410.17	33.3333	927.832
BAAT	570	261.296	6093.77	93.3512	7.6305	3012.27	4367.7	5130.79	3716.83	1.2484	2797.48	3670.08	182.86	8714.24	596.126	3026.89	1162.42	71.948	1008.91	1833.33	2216.79	4152.82	1119.61	2235.6	4750.85	3810.24	395.781	3791.4	5006.92	2034.95	626.293	2640.81	3325.1	300.024	410.17	1858.44	504.051
BACE1	23621	1246.6	854.774	1246.63	624.608	674.674	741.409	994.076	883.587	310.237	727.764	867.061	1461.18	1846.19	1286.2	673.343	1307.38	240.847	1052.12	724.829	1555.49	1510.68	595.482	788.595	1245.24	1373.69	1465.58	751.274	666.09	765.048	816.317	1136.42	810.077	1224.86	1960.78	973.663	1321.2
BACE2	25825	2098.53	1458.55	8467.24	284.507	2832.49	4116.84	2941.52	3619.3	1228.46	885.817	3135.09	2506.58	5314.68	2238.74	2833.8	3518.69	3663.22	2800.89	2551.81	2615.94	934.979	2665.81	2583.53	3351.25	316.647	5347.55	1291.86	389.273	668.447	4595.44	3639.37	9479.65	3008.06	2101.14	1157.61	2810.92
BACH1	571	913.446	707.261	1236.42	601.172	1281.67	939.862	348.777	1298.9	442.572	719.952	756.728	775.562	859.951	832.93	486.103	622.513	509.759	517.595	650.049	1237.43	1391.55	257.7	262.097	262.824	258.44	506.695	727.748	1054.79	1317.96	1017.02	1098.15	477.713	628.064	1857.59	655.967	385.392
BACH2	60468	156.233	37.7358	76.334	5.9954	132.765	131.443	31.5965	91.7672	810.861	64.3029	15.6082	81.8838	66.1501	97.8208	123.326	28.7806	148.999	103.341	79.1789	184.023	157.095	93.9425	12.0968	21.0064	77.9977	36.4972	128.611	31.1419	37.8641	36.5431	230.638	31.9767	76.8792	432.311	196.708	35.8968
BAD	572	1209.28	1566.29	1396.74	756.158	1027.69	1374.77	4799.34	807.016	1067.7	2313.56	2312.67	751.587	1137.56	673.976	905.984	665.487	367.93	887.693	830.137	526.146	728.59	1695.63	2419.23	1715.34	1754.28	1395.03	1138.41	1649.39	1172.85	1067.94	1299.85	1044	792.038	1257.77	688.387	1579.72
BAG1	573	1311.2	3373.62	1971.17	724.578	1193.32	2309.62	3432.74	675.149	1040.41	970.949	1801.47	1266.96	1577.68	682.47	770.262	2258.07	2891.14	1108.79	895.958	819.35	963.071	1299.47	6126.57	814.709	970.408	3710.23	940.536	2348.73	770.311	929.039	779.321	1175.36	3124.92	1396.19	897.856	951.475
BAG2	9532	185.629	48.5992	191.564	28.3417	101.769	16.323	23.6974	98.0598	155.431	22.8365	18.8375	55.5791	248.41	45.0363	27.0057	256.36	460.263	37.8619	70.87	97.3804	67.3944	22.0739	146.889	8.7934	18.6263	52.6129	67.4422	48.4429	107.767	52.2848	147.294	702.519	37.1366	33.399	95.8848	531.472
BAG3	9531	2517.15	699.828	1480.49	1881.46	615.265	633.162	538.356	732.04	554.931	1628	958.019	1145.52	438.534	820.339	1677.96	551.095	1146.06	595.1	633.431	565.028	2065.02	981.006	1800.69	847.582	1218.86	979.737	1715.33	931.949	929.612	711.748	485.389	947.19	899.422	1077.77	1735.8	1003.12
BAG4	9530	112.139	137.793	116.203	182.041	220.586	107.388	24.9127	92.8159	44.3196	54.0865	27.4489	266.44	132.763	90.0726	126.027	277.679	83.6841	281.069	95.7967	165.139	132.416	35.4209	29.3779	66.4387	182.771	142.197	84.6948	127.451	92.7184	160.228	93.3036	150.678	153.107	222.91	144.033	115.169
BAG5	9529	1267.83	710.12	1636.56	732.525	912.308	1262.03	729.759	729.418	1106.12	584.736	533.907	1245.23	878.455	542.857	588.275	1587.73	1281.8	796.437	796.676	1251.13	1205.03	560.062	606.567	667.807	767.171	707.667	626.846	1198.96	948.544	1436.43	647.884	711.725	708.852	992.213	863.375	1011.59
BAGE2	85319	3.2662	1.3894	0.4862	1.5206	0.8782	0	0	1.0488	0.6242	0.601	0	2.8171	2.1695	0.4843	1.6113	2.2918	0	3.2071	4.8876	1.9291	2.373	0	0	0	0	0.948	0.5228	2.3068	1.4563	2.5243	3.6692	0.4457	1.8731	4.7659	0.6255	0.9971
BAGE	574	0	0.5718	0	0	0	0	0	0	0	0	0	0	0	0	0	0	0	0	0	0	0	0	0	0	0	0	0	0	0	0	0.5242	0	0	0.3115	0	0
BAHCC1	57597	838.323	474.557	429.804	555.934	1450.6	744.845	540.787	156.791	173.533	338.942	2117.87	917.692	2117.73	644.552	1007.31	2113.24	923.077	996.882	1188.17	664.26	849.549	563.142	411.866	485.589	381.839	761.702	760.162	617.07	903.398	2628.86	1032.63	1418.12	841.437	1073.27	422.634	424.779
BAHD1	22893	652.695	1006.29	701.592	666.031	1010.98	756.014	619.171	606.188	814.607	380.409	559.742	715.74	941.83	898.305	649.038	780.274	872.56	442.762	395.894	703.138	621.737	564.682	593.318	314.607	764.843	693.447	453.797	710.496	868.447	529.032	877.998	516.957	881.831	1093.54	681.481	460.177
BAI1	575	60.4246	17.7244	27.2274	10.3556	33.0621	64.433	42.5338	2.6219	154.806	121.394	74.2734	55.1549	60.1365	89.1041	58.9625	233.442	16.8389	53.8976	31.7693	15.9215	112.482	10.7803	2.3041	62.042	16.298	17.5376	37.6421	0.5767	28.1553	234.438	7.8627	91.5698	188.94	28.1452	27.572	7.9771
BAI2	576	175.286	80.6175	142.458	185.856	24.28	18.0412	49.2177	129.523	187.89	22.2356	108.719	11.031	9.2518	341.889	222.347	51.1655	58.681	114.477	20.0391	48.1348	32.748	69.3018	116.359	16.1212	74.5052	126.555	42.8702	10.9573	82.0388	77.0217	81.2475	112.888	59.614	779.811	118.519	82.2635
BAI3	577	25.5852	4.0023	3.4034	0.545	7.2323	0	4.861	11.5364	1.2484	1.2019	2.1529	1.6971	2.7755	2.4213	3.6008	1.0659	2.5513	4.8998	4.3988	9.2567	22.7812	1.0267	3.4562	0.4885	2.3283	0.948	6.2737	14.4175	1.9417	0.5622	5.766	2.907	0.9773	6.7549	13.9918	0.9971
BAIAP2	10458	2300.49	512.865	4148.78	1188.17	996.513	971.143	869.5	1566.33	435.443	429.928	683.821	926.602	535.677	1163.2	1661.75	1347.89	843.475	803.118	526.647	792.002	806.834	617.557	1072.58	3369.32	3027.94	404.787	1412.63	364.475	830.209	631.915	1167.87	2801.36	682.639	224.787	1393.83	1216
BAIAP2L1	55971	1619.49	2647.8	7039.04	2608.53	2002.32	3287.8	1560.38	3773.99	70.5368	3394.23	4053.82	2899.02	2201.92	2080.39	2850.91	2785.32	2637.58	2921.6	2923.26	2276.03	2420.5	3613.96	2574.88	2806.44	2864.96	3110.32	2810.61	1950.98	2049.03	2496.18	1548.42	1458.82	3478.46	5507.08	2731.51	1086.88
BAIAP2L2	80115	395.21	198.971	738.544	2327.84	846.184	4528.35	977.062	1153.64	84.2697	2942.31	2159.31	679.253	333.526	2858.11	1723.87	2046.62	582.727	540.757	2340.18	220.309	1570.95	1743.33	3957.95	2727.89	694.994	260.694	660.306	2171.86	1681.55	1682.11	924.125	354.651	1795.59	1429.78	708.642	455.69
BAIAP3	8938	362.292	272.104	464.228	139.599	29.9729	232.972	101.65	859.439	303.202	844.525	583.983	1608.8	33.7921	1122.1	843.178	186.098	153.703	469.88	331.921	565.08	171.448	585.893	125.662	143.205	450.896	451.418	1216.79	54.2503	244.374	604.452	112.772	123.614	1526.31	75.5455	568.93	63.3628
BAK1	578	737.071	537.45	533.366	768.497	683.456	690.722	638.615	620.87	612.984	748.197	444.564	708.104	666.127	846.005	927.647	754.691	608.241	550.111	790.323	715.357	600.38	847.023	1965.44	1784.07	4033.76	421.377	709.45	321.799	708.252	769.092	571.354	1741.76	600.049	417.3	452.675	651.128
BAMBI	25805	703.865	837.05	243.102	183.131	471.135	2579.9	382.804	622.444	119.85	3030.65	1827.77	4069.16	529.663	3093.95	347.924	447.698	2214.57	1946.1	310.85	4397.67	2100.14	1806.98	1216.59	1444.55	367.87	467.354	546.857	2604.38	2247.57	754.475	1398.51	44.5736	4538.81	1766.77	938.683	922.847
BANF1	8815	3248.78	2757	2494.23	2560.57	1846.31	2539.52	5270.55	1847.93	3686.02	5748.2	1973.09	1680.1	2224.59	2350.61	2067.29	3081.12	3283.58	1679.29	1397.36	1377.02	1449.93	2804.41	3763.82	3840.74	2349.24	3167.67	2201.02	2867.36	2177.67	1927.23	2507.14	2600.29	2494.34	1547.61	2472.02	3653.99
BANF2	140836	0.5444	0	0.4862	0	0	0	0	0	0	0	0	0	0	0	0	0	0	0.4454	0	0	0	0	0	0	0	0	0	0	0	0	0	0	0	0	0	0
BANK1	55024	166.032	68.0389	137.596	357.542	148.263	16.323	4.861	2.0975	3860.17	3.6058	30.6781	1.6971	20.3539	0	23.8551	3.7308	6.1232	9.7996	104.106	4.4432	170.859	8.2136	18.4332	0.4885	0	15.1677	204.418	0.5767	3.3981	48.9116	62.3771	2.4225	34.2047	0.3753	394.65	78.7735
BANP	54971	244.42	320.755	262.064	227.824	246.416	123.711	444.782	203.985	536.829	603.966	229.817	332.626	225.28	419.37	279.959	211.058	291.364	229.399	453.079	359.159	382.534	244.353	346.198	250.611	235.157	210.925	279.179	243.368	316.505	225.443	258.42	177.81	239.759	231.917	372.017	301.134
BAP1	8314	1265.65	419.097	1529.11	1106.96	1801.89	439.003	665.35	510.226	2511.24	1421.88	1259.96	1618.58	414.942	1583.54	1292.67	301.13	1209.34	912.249	1203.81	602.795	1303.75	1340.86	532.258	307.767	1626.31	1257.49	1207.16	1874.28	1555.34	1000.72	1565.72	365.31	1928.17	1925.51	945.679	1901.03
BARD1	580	34.8394	40.0229	38.4101	53.9583	63.0247	35.2234	0	101.731	7.4906	12.0192	72.1206	79.7624	34.2315	84.7458	49.5105	115.122	79.602	59.6882	90.9091	57.0212	113.431	5.6468	2.8802	17.0982	25.6112	46.925	36.0737	37.4856	73.7864	120.311	136.81	30.0388	70.364	87.4378	77.3663	76.2807
BARHL1	56751	0	1.1435	0.9724	0	0	0	1.8229	0	0	0	0	0.4243	0	0	0	0	1.5308	0	0	0	0	0	0	0	0	0	0	0	0	0.5622	0	0	0.3258	0	0.4115	0
BARHL2	343472	0	0	0	0	1.0332	0	0	0	0	0	0	0	0	0	0	0	0	0	0	4.4432	0.4746	0	0	0	0	0	0	0	0	0	0	0	0	0	0	0
BARX1	56033	2.7218	1.1435	3.8896	3.8152	1.0332	0	4.861	0	0	1.8029	0	0.4243	0.4626	0.4843	1.3503	0	2.0411	1.7817	0	0	0	9.7536	1.7281	2.9311	5.8207	19.9076	0	0.5767	1.4563	3.9354	0	0	5.5379	7.8807	5.3498	0
BARX2	8538	622.755	63.4648	199.344	506.336	13.9481	26.6323	219.96	1.5732	9.9875	2.4038	10.7643	1637.25	352.955	24.2131	43.2092	31.4455	122.975	5.3452	107.527	26.6593	836.26	21.0472	135.945	5.8622	0	57.3528	6.7965	6.9204	128.641	252.991	86.4893	92.5388	739.8	702.505	675.309	46.8653
BASE	317716	0	0	0	0	0	0	0	0	0	0	0	0	0	0	0	0	0	0	0	1.4811	0	0	0	0	0	0	0	0	0	0	0.5242	0	0	0	0	0
BASP1	10409	745.237	281.304	714.234	191.307	510.397	177.835	166.489	239.643	3049.94	33.0529	54.3595	63.6402	338.615	62.954	136.379	187.607	1650.72	1277.51	262.952	486.161	309.919	303.901	103.111	52.2716	192.084	546.51	383.741	156.863	102.427	164.163	161.447	447.674	75.2504	27.77	327.983	328.555
BAT1	7919	4656.51	4225.27	4390.91	4224.55	4606.48	6907.15	6705.15	4688.52	11338.4	9443.51	4238.84	7830.29	7437.96	7288.14	5601.44	7671.62	14446.2	4836.53	6874.43	6985.84	5378.26	7567.25	7801.84	3927.21	5492.43	3646.6	6282.98	7966.25	6524.27	6891.2	3827.74	5744.19	5855.08	4181.73	3236.96	4246.29
BAT2	7916	5652.15	5820.47	4260.61	3489.3	7819.19	6400.34	4290.45	6735.19	6867.67	6464.54	3148.01	9217.23	8599.05	6420.82	6399.01	8680.01	9066.97	6138.98	5891.01	10235.3	6301.85	6547.23	7689.52	5194.92	7048.89	3971.09	4984.45	4091.12	6133.98	5660.81	7307.56	11788.8	5660.07	5602.4	2878.19	6973.45
BAT2L1	84726	2829.4	2619.34	2891.73	2577.4	4177.7	2405.65	2166.59	2917.36	4910.02	1886.57	2032.49	4189.08	6253.52	2732.15	2993.67	4428.96	6162.02	4832.12	2929.21	5229.24	3871.33	5196.06	2531.69	1649.74	2742.97	3181.78	1857.99	1650.93	3179.43	3532.28	3385.78	2794.33	3900.43	4482.91	1980.45	2796.79
BAT2L2	23215	3149.7	3734.13	2987.72	4406.05	4745.96	8022.34	1873.92	3679.6	3077.4	2465.14	3416.58	11334.7	5515.9	4221.79	3913.13	7729.72	6090.06	6012.92	8666.67	6394.89	5786.9	3417.35	1565.09	1678.55	3107.1	3173.84	4435.5	2478.66	3578.64	9508.52	8009.44	4895.35	6631.16	3723.43	5479.42	2548.67
BAT3	7917	5681	6235.56	4154.61	4256.17	6030.22	7082.47	7283.61	5936.03	5381.4	7934.5	3100.11	7302.08	6528.97	6333.17	6276.58	6438.32	6503.89	5866.36	6090.91	8363.21	5007.59	8555.95	12823.2	7567.17	9365.54	3322.67	6255.17	5085.35	6675.73	5619.21	5977.2	9959.3	5846.73	5054.49	3559.23	6771.03
BAT4	7918	481.764	719.846	389.936	524.867	496.965	542.955	1176.97	316.728	608.614	1289.07	249.731	566.398	584.712	541.404	536.964	441.835	281.158	622.717	444.281	370.638	483.151	842.916	1122.7	532.975	519.208	397.204	565.16	544.406	558.738	356.998	619.578	646.318	442.707	322.357	404.527	428.269
BAT5	7920	988.568	782.161	1003.04	692.737	1298.72	1238.83	1135.65	764.027	1080.52	911.659	667.384	1251.17	1403.49	1189.83	832.677	1391.59	1541.37	1073.05	1185.73	2006.11	839.582	1117.04	1728.11	1712.26	2216.53	438.915	1124.56	1160.32	945.631	762.908	1266.94	1216.57	913.755	1235.76	581.07	1331.17
BATF	10538	507.349	38.8794	282.971	95.9259	213.354	18.0412	81.4218	44.5726	1426.97	16.8269	689.451	81.8838	122.123	76.9976	30.6065	20.786	59.7015	17.8174	118.768	108.488	81.158	32.3409	25.3456	19.5408	4.6566	53.5608	220.625	262.399	21.8447	17.4283	17.2979	18.4109	168.092	1072.52	156.379	358.469
BATF2	116071	304.845	134.363	107.937	755.961	321.839	242.268	103.296	81.8039	242.197	97.3558	68.3531	115.401	348.329	113.317	298.413	546.298	29.5956	305.568	196.481	94.0479	154.248	175.051	72.0046	678.554	146.682	119.445	234.218	168.397	272.815	94.4499	123.182	259.69	271.358	80.683	484.774	340.022
BATF3	55509	81.6549	21.7267	39.8687	24.5265	53.2094	14.6048	86.8905	43.5239	173.533	10.8173	93.6491	10.6067	33.3063	15.4964	9.9021	13.3243	6.1232	38.3073	36.1681	15.181	30.3749	52.3614	28.8018	32.2423	9.3132	37.9192	50.7123	19.0311	18.932	26.4235	53.4661	35.8527	13.3561	5.629	31.2757	82.2635
BAX	581	1187.26	1342.48	1011.79	1340.24	1387.06	2231.1	3814.67	1384.9	2111.74	2219.95	1362.76	736.105	708.685	1710.9	735.906	1558.95	1885.44	953.675	1767.84	2404.15	2514.95	1529.26	2029.95	4455.79	334.109	1029.03	1559.53	2223.18	2508.25	787.083	1557.33	1408.91	1338.87	469.462	1745.68	1661.22
BAZ1A	11177	759.935	437.393	1453.26	1002.32	820.354	774.055	131.855	790.771	996.255	519.231	1160.93	885.023	1245.29	271.671	540.565	791.466	1040.95	1142.09	984.36	1094.88	1072.62	482.033	186.06	421.593	571.595	1097.29	808.783	581.315	783.495	1194.12	644.214	362.888	1252.87	753.166	841.975	841.581
BAZ1B	9031	1729.99	2730.13	2029.9	2616.16	2738.47	1500	1227.4	2258.52	1737.2	2084.13	2513.46	1941.88	2698.28	1385.96	2004.28	2305.64	2403.37	2623.61	2329.91	2124.59	2622.21	1496.92	1705.65	1534.93	1409.78	2101.67	1839.76	1629.18	1648.54	2350.57	2717.86	3122.09	1676.68	1861.71	2344.03	2012.21
BAZ2A	11176	2597.15	3059.18	1602.53	2867.03	4075.41	3153.38	1036.64	2173.62	2295.96	1693.63	2179.64	3184.4	3591.57	2944.89	3144.04	3025.25	1869.22	4157.12	2850.95	4820.62	2581.35	2481.24	1504.03	1370.48	1731.29	3367.51	2027.43	1928.33	2886.49	2657.73	2329.68	2865.82	2913.43	3535.49	2723.12	1368.33
BAZ2B	29994	612.597	757.833	772.846	783.84	670.36	639.691	502.008	831.023	380.805	397.278	344.575	1281.57	956.387	783.254	502.239	589.618	699.798	915.367	748.744	776.681	1208.36	594.738	354.361	137.005	212.945	451.504	680.199	597.566	1084.96	1201.41	1450.31	611.022	603.883	1568.2	693.728	290.988
BBC3	27113	301.034	371.641	633.524	269.247	598.734	996.564	875.589	557.42	321.473	617.788	591.496	531.608	315.023	867.312	490.604	1007.85	444.444	355.011	711.633	578.728	510.204	437.885	593.894	1458.23	239.814	460.718	402.562	603.806	893.204	578.506	335.998	722.868	617.64	170.748	302.881	333.043
BBOX1	8424	18.5084	132.647	8.7517	6.5404	150.846	573.883	7.8991	40.9019	1.2484	63.101	125.404	47.518	42.5581	25.1816	1877.35	364.021	1.5308	960.356	123.656	61.8347	485.999	163.244	199.309	364.436	16.298	465.458	70.579	104.96	355.825	860.169	272.572	126.454	16.9395	181.255	159.259	146.579
BBS10	79738	421.884	469.983	255.257	224.554	485.083	393.471	132.462	383.325	200.999	395.433	459.096	403.055	684.168	461.017	379.881	439.703	269.932	674.388	345.063	373.97	418.605	220.226	179.148	368.344	193.248	374.926	345.053	306.805	459.223	323.828	483.292	919.089	457.041	340.37	582.304	259.753
BBS12	166379	132.281	138.936	158.989	38.1523	115.717	53.2646	41.9262	50.3408	54.3071	43.2692	31.2164	95.0361	78.1774	87.1671	82.8176	84.2099	66.335	136.303	124.633	61.0941	111.533	100.616	58.7558	18.0752	8.149	124.185	58.0316	65.1672	112.136	106.818	69.1915	49.9031	109.781	812.459	65.8436	183.472
BBS1	582	826.892	1755.29	762.854	915.798	1378.79	1408.93	644.083	825.905	291.511	879.808	1045.21	865.083	1102.35	1325.91	927.823	1262.77	1741.04	935.412	506.843	553.18	951.115	833.162	1045.51	509.038	403.306	1114.82	896.092	1540.37	1051.46	800.576	1512.96	1150.68	907.891	896.388	559.259	372.429
BBS2	583	769.189	1027.44	868.36	844.802	603.384	547.251	455.719	589.407	584.894	429.688	1192.14	453.967	729.502	865.86	649.488	1098.46	694.987	666.815	723.851	558.734	635.026	326.489	469.47	403.517	725.262	760.28	587.113	556.517	517.961	404.223	544.621	595.93	796.808	635.707	629.63	575.346
BBS4	585	407.186	439.108	297.071	391.879	425.675	388.316	342.701	316.728	385.144	674.279	431.647	484.09	572.222	699.758	372.679	626.244	570.481	567.038	509.775	325.465	584.718	432.238	379.032	601.368	410.943	487.262	704.222	346.598	422.815	357.56	1195.13	702.035	428.699	585.421	593.827	220.865
BBS5	129880	158.411	12.3899	177.951	55.5934	183.04	130.584	173.107	57.6822	121.723	149.008	139.726	220.195	272.002	238.954	29.7063	160.425	100.538	240.98	356.794	103.875	194.589	346.509	71.4286	40.5471	122.235	51.1909	156.319	81.8916	274.272	130.993	201.808	165.698	280.805	254.302	151.7	353.519
BBS7	55212	214.48	122.356	306.308	202.752	146.197	79.8969	72.3075	93.8647	88.6392	117.788	139.935	188.799	94.8306	297.821	290.762	89.0066	160.735	306.904	273.705	64.0563	402.468	150.924	143.433	74.255	58.2072	161.156	111.358	179.931	242.718	355.312	136.81	144.38	218.585	157.238	143.621	396.859
BBS9	27241	320.087	128.645	304.85	145.524	107.452	62.7148	94.7896	119.035	199.75	216.346	168.999	275.774	171.62	327.845	278.609	112.457	179.105	337.639	299.12	134.037	234.931	147.331	62.788	85.0024	48.8941	209.977	223.762	252.018	144.66	207.453	175.6	162.791	223.471	247.303	226.749	166.521
BBX	56987	1222.65	1048.03	1395.89	707.453	1413.41	1100.52	301.382	2515.47	870.162	315.505	1111.95	1552.4	2513.7	1396.13	1033.42	1853.15	1209.34	1017.37	1193.06	570.582	1524.92	931.212	388.825	433.806	229.336	2004.5	569.86	510.957	1183.98	807.322	1035.78	1048.45	1168.17	1131.81	1127.98	1506.67
BCAM	4059	3381.06	11719.8	3278.96	1136.39	5033.71	5960.48	11033.9	4185.11	1739.08	12006.6	7107.1	3429.78	1790.68	13047.9	9393.05	3357.2	1284.86	1842.32	4921.31	13959.5	4632.65	7357.8	2316.24	7931.12	4455.18	8769.76	12907.1	6698.39	4061.65	2599.06	4065	3950.58	4458.02	1802.8	1683.54	1115.29
BCAN	63827	54.4366	54.3168	10.2103	46.8729	724.267	56.701	56.5092	41.4263	3.7453	82.9327	25.8342	259.652	1271.19	21.7918	55.3618	345.9	68.8863	213.363	64.0274	234.009	7.1191	30.2875	91.5899	28.8227	76.8335	53.0869	9.9333	58.8235	61.165	279.414	78.1025	200.581	147.243	28.8958	63.786	9.4728
BCAP29	55973	1045.18	739.851	643.734	1171.82	796.591	324.742	501.899	1126.38	525.593	685.697	776.642	873.992	1041.29	540.436	465.849	880.473	478.632	810.245	678.397	833.102	573.802	662.218	644.585	584.758	419.092	1276.45	733.499	608.996	650.971	582.441	1825.71	921.512	677.58	1161.08	1107.41	2424.03
BCAP31	10134	6563.96	9379.65	6809.29	9534.81	7824.36	9153.78	14565.4	7232.83	5216.6	5218.15	7641.01	4781.08	5630.62	15735.1	5422.3	6274.17	6826.89	5262.36	5273.7	8854.95	3754.63	14152.5	15235.6	9115.78	6685.68	6292.69	5424.65	8560.55	7265.05	4624.67	6286.46	10037.8	7415.26	3544.42	8007.82	7655.99
BCAR1	9564	3291.24	3912.52	5577.73	4135.17	1925.35	6733.68	4077.78	4778.71	699.126	5700.72	6335.85	3040.31	2039.55	2994.19	2424.67	4767.45	1924.22	1675.72	2556.7	3003.98	1939.25	1742.81	7554.72	5172.94	2523.86	4914.33	2935.56	4934.26	4654.85	2260.05	2633.47	2855.62	2740.94	3274.6	2706.58	2962.98
BCAR3	8412	1701.68	517.438	649.568	428.941	678.807	533.505	246.696	650.236	391.386	353.966	716.222	319.898	793.339	301.211	481.152	316.586	58.1707	704.093	282.502	386.93	282.867	412.731	259.793	481.612	195.576	240.787	437.067	1039.65	1111.16	323.266	690.866	365.165	102.614	2432.49	1136.63	683.535
BCAR4	400500	0	0	0	0	0	0	0.6076	0.5244	0	0	0.5382	0	0	0	0	0	0	0	0	1.1108	0.4746	0	0	0	1.1641	0	0	0.5767	0	0.5622	0.5242	0	0.3258	0	0	0
BCAS1	8537	605.879	2.8588	1940.44	27.7967	27.3796	64.433	5.4686	3.6707	59.9251	160.457	142.626	71.7013	6.0136	69.2494	71.1151	31.4455	428.626	6.6815	238.025	23.3269	11.3906	42.6078	12.0968	117.733	147.846	0.474	41.3018	726.644	52.4272	311.46	24.1122	1.4535	66.4549	91.1905	147.737	75.7821
BCAS2	10286	579.461	576.775	709.707	407.821	647.945	812.5	751.025	592.496	469.17	723.486	558.87	459.257	357.849	482.906	588.896	742.608	372.915	852.107	564.501	692.197	543.394	753.722	544.798	968.197	401.63	321.048	634.265	643.293	671.539	548.001	749.081	630.77	310.296	620.963	935.197	850.036
BCAS3	54828	717.474	684.963	405.008	605.532	647.811	239.691	539.572	1105.93	416.979	703.125	1021.53	389.054	472.303	651.332	552.267	568.15	612.833	822.717	571.847	532.074	501.661	766.941	546.083	769.419	710.128	451.712	581.885	404.844	718.447	796.64	1946.27	954.942	452.806	991.463	502.881	507.042
BCAS4	55653	1715.3	566.61	476.966	469.819	430.841	711.34	734.62	262.192	2923.85	1359.38	954.79	249.47	277.553	767.07	495.555	174.815	249.522	698.441	1373.41	267.703	419.079	979.98	320.853	1902.3	281.723	1444.25	1293.95	824.683	419.903	452.573	392.609	390.504	1169.8	993.714	1608.64	762.308
BCAT1	586	3767.56	221.841	1028.81	232.729	291.877	154.639	35.2423	207.132	164.17	21.6346	51.1302	98.4302	189.199	67.3123	147.631	157.76	96.9511	281.96	195.015	239.193	142.857	84.7023	133.065	64.4846	58.2072	302.88	73.193	99.7693	95.1456	294.594	113.747	393.411	155.387	139.976	237.86	1840.21
BCAT2	587	776.266	568.325	528.018	678.567	449.955	398.625	1527.57	222.339	759.051	1082.33	668.461	697.072	264.6	769.976	562.169	760.021	423.013	598.218	881.232	307.692	532.511	850.616	251.152	925.745	770.664	549.354	494.053	512.687	592.233	973.734	814.572	627.423	628.064	707.383	453.909	496.572
BCCIP	56647	1092.16	1371.83	643.423	915.514	1077.93	1042.04	1250.64	994.919	1041.02	938.738	2061.7	1887.2	674.708	824.542	1068.94	1142.79	1559.95	912.726	656.828	757.697	869.127	1010.44	1457.19	1337.15	1522.08	1147.73	1312.87	993.945	995.262	1035.35	975.799	971.463	921.942	846.654	1008.84	935.904
BCDIN3D	144233	192.804	179.537	100.751	251.01	117.66	156.692	192.867	114.468	307.391	232.079	154.5	192.032	211.236	149.86	127.107	150.538	101.957	257.995	157.6	165.062	247.091	179.63	131.826	145.442	58.766	171.272	197.731	225.588	154.82	189.001	177.01	131.608	194.003	260.287	242.732	116.321
BCHE	590	39.1943	81.1893	28.686	0	16.0145	5.1546	9.1144	491.872	9.9875	9.0144	129.709	20.7891	24.9798	17.4334	41.8589	24.5168	16.3286	31.1804	12.219	227.344	401.044	96.5092	12.0968	1.9541	10.4773	1120.51	162.07	759.516	23.7864	18.5527	20.4429	135.659	90.2354	33.7743	141.564	71.7936
BCKDHA	593	739.793	2413.22	661.237	696.553	1268.24	606.529	2787.18	1006.82	983.146	942.909	1923.04	1108.19	3055.39	1658.46	1449.18	2499.65	719.99	881.96	1156.4	1480.59	1417.93	1418.38	2012.1	1166.1	3329.45	3769.89	1424.24	1343.71	922.33	1064.25	1690.32	1690.89	1000.73	1838.07	1000.82	531.971
BCKDHB	594	195.427	209.262	251.367	198.392	254.165	91.9244	97.8277	626.114	167.915	132.812	433.262	313.534	290.968	229.056	161.584	413.588	632.223	110.913	198.436	224.382	236.355	80.0821	165.323	139.228	973.225	112.336	473.141	670.704	169.903	297.967	186.083	189.923	134.213	700.629	244.033	281.192
BCKDK	10295	1176.37	1415.09	1155.71	2528.95	969.133	1232.82	2568.43	1529.1	1001.87	1828.12	1242.73	1094.61	976.524	1497.34	1209.41	970.012	661.309	1059.69	947.703	860.131	1255.81	1579.57	2005.18	1418.66	1000	2160.92	1671.94	1877.74	1608.74	1077.74	1123.31	1922.97	904.634	891.266	1118.52	1965.35
BCL10	8915	557.975	519.726	1275.31	805.014	450.471	919.244	410.755	508.652	689.132	387.62	393.972	451.846	481.092	386.925	1268.37	267.02	277.076	614.699	557.185	613.163	625.059	1105.24	445.276	428.432	434.226	382.51	349.758	415.225	294.175	447.513	470.187	771.802	183.403	393.658	1286.01	700.486
BCL11A	53335	172.564	88.6221	41.8135	153.699	123.983	12.8866	94.182	43.5239	1627.96	72.7163	1.0764	144.251	122.586	160.775	8.1017	88.4736	543.437	215.59	79.6676	132.185	34.6464	172.485	42.0507	3.9082	47.7299	6.1619	76.8527	12.1107	9.2233	263.673	175.6	53.7791	102.94	335.866	170.37	46.8653
BCL11B	64919	374.524	63.4648	134.192	438.207	130.182	33.5052	13.3678	50.3408	1438.2	91.9471	5.3821	12.3038	242.859	26.6344	81.0172	41.039	146.447	66.8151	161.29	30.3619	208.353	40.5544	13.2488	9.2819	4.6566	63.0406	212.783	36.9089	38.3495	19.6771	28.8298	24.2248	2.9318	3.3774	109.876	367.444
BCL2	596	421.339	477.987	143.43	396.784	896.81	725.945	602.765	252.229	2570.54	47.476	229.817	73.8227	2040.01	289.104	880.837	356.559	118.893	412.472	358.26	96.2696	1260.09	164.271	208.525	1239.86	48.8941	615.239	294.341	561.13	789.32	135.491	753.243	340.116	475.283	78.8066	547.325	227.346
BCL2A1	597	83.288	33.7336	138.568	211.473	122.433	11.1684	41.9262	74.4625	1213.48	10.8173	21.5285	11.4552	88.3543	6.7797	41.4088	18.1211	91.8485	65.0334	50.3421	67.3887	70.7167	81.1088	21.8894	21.4949	1.1641	136.983	108.744	27.105	46.1165	92.2011	27.2572	20.8333	4.2349	4.8785	223.045	242.802
BCL2L10	10017	9.7986	1.7153	1.4586	27.2517	2.0664	18.9003	9.722	5.7682	36.2047	124.399	20.4521	30.5473	11.1021	64.891	22.0547	4.7968	8.1643	15.5902	41.5445	6.2945	31.7988	2.5667	1.1521	174.89	54.7148	1.896	28.2316	1.1534	18.932	1.1244	45.6035	7.7519	39.7427	63.4206	44.856	7.4785
BCL2L11	10018	1099.07	1380.79	515.862	685.652	2363.94	670.103	384.019	3158.89	1274.03	1242.19	526.911	1925.75	1279.98	1962.23	1315.18	683.805	1112.9	908.24	1009.78	1826.53	1914.1	1402.98	483.295	1452.37	395.809	800.095	1215	1619.95	1604.85	2140.87	1245.97	468.508	1046.34	797.073	789.3	451.701
BCL2L12	83596	330.898	256.244	240.18	566.404	195.661	223.308	682.88	255.522	682.016	1052.7	531.658	237.743	111.428	326.392	241.886	469.763	434.03	218.419	465.87	423.838	263.555	301.694	314.522	266.659	151.385	148.842	592.121	285.611	271.068	302.414	297.906	339.913	303.513	195.767	285.481	229.306
BCL2L13	23786	922.7	2077.76	1143.07	981.605	1995.09	2176.98	1328.27	3352.91	751.561	1178.49	1749.73	1450.57	1235.11	1340.92	1851.69	2027.97	1482.33	1528.29	1354.35	1548.09	1280.49	606.776	1441.82	1536.39	841.676	3212.7	1215.53	666.09	1243.2	1118.78	1223.95	1886.14	1821.97	1540.86	1457.2	1510.16
BCL2L14	79370	157.866	1.7153	133.22	180.951	9.2987	3.4364	3.0381	2.0975	132.335	6.0096	8.0732	1.6971	11.5647	0.4843	5.8512	0.533	54.0885	1.7817	14.174	105.897	11.3906	4.1068	0.576	0.4885	0	3.7919	28.2316	3.4602	2.9126	19.1149	4.1934	0	23.7804	1.5011	7.4074	7.9771
BCL2L15	440603	230.267	9.7198	893.157	991.961	24.28	12.8866	18.8364	1.0488	36.2047	14.4231	19.3757	36.0628	8.7892	22.7603	22.0547	3.7308	449.547	3.118	126.1	7.7756	12.3398	3.0801	5.7604	4.3967	10.4773	5.2139	29.2772	9.2272	125.728	87.7035	112.698	7.7519	14.9849	702.505	337.86	29.914
BCL2L1	598	7555.25	11844.5	5853.9	4856.79	15721	20442.4	11999.4	11302.6	1654.18	9209.74	8424.11	8589.31	4626.81	9805.33	10501.6	8264.29	2960.58	6277.51	7413.98	10684.8	12739	17019.5	15801.3	16419.6	3594.88	11585.7	8328.85	14137.8	16270.9	4426.22	10751.4	6990.31	15416.9	2048.22	15335.4	6680.79
[truncated: 19,080 more rows]
