# Supplementary material for: Bioinformatics analysis identified CDC20 as a potential drug target for cholangiocarcinoma
Source: PeerJ. 2021 Mar 17;9:e11067. doi: 10.7717/peerj.11067 (PMC7980698; doi:10.7717/peerj.11067)
Supplement: Supplemental Information 6 [file peerj-09-11067-s006.xlsx]

## Sheet: GSE26566
ID	adj.P.Val	P.Value	t	B	logFC	Gene.symbol	Gene.title
ILMN_1767643	8.8e-34	4.15e-38	-19.82	73.6117	-10.1548	CTRB2	chymotrypsinogen B2
ILMN_1814476	3.21e-29	3.03e-33	-17.7436	63.2143	-9.71439	CELA2A	chymotrypsin like elastase family member 2A
ILMN_1685174	9.23e-29	1.3e-32	-17.4146	61.8664	-10.9876	CPB1	carboxypeptidase B1
ILMN_1721549	8.53e-25	1.61e-28	-16.175	52.9412	-10.7834	PLA2G1B	phospholipase A2 group IB
ILMN_1683048	1.1e-22	2.58e-26	-14.0535	48.3865	-8.08967	PNLIPRP2	pancreatic lipase related protein 2 (gene/pseudogene)
ILMN_1754364	1.09e-21	3.08e-25	-15.7767	45.6473	-11.9555	CPA1	carboxypeptidase A1
ILMN_1688458	3.17e-20	1.05e-23	-13.4852	42.6296	-8.9021	CELA2B	chymotrypsin like elastase family member 2B
ILMN_1723418	5.85e-18	2.21e-21	-11.9862	37.6087	-9.67991	CEL	carboxyl ester lipase
ILMN_1651430	2.34e-17	9.93e-21	-14.8504	35.733	-9.50585	CTRB2	chymotrypsinogen B2
ILMN_1803773	1.91e-15	9.02e-19	-10.6913	31.8803	-2.89937	MAG	myelin associated glycoprotein
ILMN_1713462	2.66e-15	1.38e-18	-10.8461	31.469	-5.90161	AQP8	aquaporin 8
ILMN_1775930	1.41e-14	7.95e-18	-10.9678	29.784	-8.37636	PNLIPRP1	pancreatic lipase related protein 1
ILMN_1677559	2.42e-14	1.48e-17	-10.8637	29.1902	-10.8044	CELA3A	chymotrypsin like elastase family member 3A
ILMN_1750234	1.57e-12	1.04e-15	-9.55064	25.1394	-9.05102	PRSS2	protease, serine 2
ILMN_1736088	1.88e-12	1.33e-15	-15.5137	24.0835	-12.0925	CLPS	colipase
ILMN_1726225	7.01e-12	5.29e-15	-11.2021	23.543	-7.85807	SERPINI2	serpin family I member 2
ILMN_1751102	3.69e-11	2.96e-14	-10.9248	21.9196	-5.9298	AMY2A	amylase, alpha 2A (pancreatic)
ILMN_1693218	6.06e-11	5.15e-14	-8.62238	21.3869	-3.48534	ART3	ADP-ribosyltransferase 3
ILMN_1734773	2.48e-10	2.22e-13	-9.42504	20.0533	-11.5238	PRSS1	protease, serine 1
ILMN_1807503	3.24e-10	3.05e-13	-9.74337	19.7538	-11.2765	CPA2	carboxypeptidase A2
ILMN_1664863	3.55e-10	3.66e-13	-8.30786	19.5107	-4.25146	CTRL	chymotrypsin like
ILMN_1790106	3.55e-10	3.68e-13	-8.24486	19.4995	-3.01019	PLP1	proteolipid protein 1
ILMN_1711199	5.22e-10	5.66e-13	-8.16184	19.0868	-3.38776	ZNF331	zinc finger protein 331
ILMN_1685062	5.65e-10	6.39e-13	-8.31744	18.9915	-7.38853	REG3G	regenerating family member 3 gamma
ILMN_1765332	7.51e-10	8.85e-13	8.07512	18.6566	2.41373	TIMM10	translocase of inner mitochondrial membrane 10 homolog (yeast)
ILMN_1665207	1.71e-09	2.1e-12	8.1117	17.0835	7.02545
ILMN_1795008	4.77e-09	6.07e-12	-7.80025	16.8256	-5.24952	ATP1A2	ATPase Na+/K+ transporting subunit alpha 2
ILMN_1758529	5.15e-09	6.8e-12	-7.67797	16.7014	-2.20109	P2RX1	purinergic receptor P2X 1
ILMN_1680948	7.92e-09	1.11e-11	-7.58194	16.2327	-2.88841	LMOD1	leiomodin 1
ILMN_1773814	7.92e-09	1.12e-11	-7.5956	16.2247	-4.06826	MUSTN1	musculoskeletal, embryonic nuclear protein 1
ILMN_1748730	7.93e-09	1.16e-11	-10.9692	16.2125	-10.822	CTRC	chymotrypsin C
ILMN_1785797	9.58e-09	1.45e-11	7.52942	15.9771	3.86124	FGD6	FYVE, RhoGEF and PH domain containing 6
ILMN_1712664	1.5e-08	2.33e-11	7.43521	15.52	2.35076	KNOP1	lysine rich nucleolar protein 1
ILMN_1812968	2.26e-08	3.62e-11	-7.34775	15.0971	-2.94107	SOX18	SRY-box 18
ILMN_1652065	4.25e-08	7.17e-11	-7.21828	14.4428	-3.2066	KCNMB1	potassium calcium-activated channel subfamily M regulatory beta subunit 1
ILMN_1743445	4.25e-08	7.22e-11	-7.21707	14.437	-4.20538	FAM107A	family with sequence similarity 107 member A
ILMN_1669015	5.41e-08	9.44e-11	7.15643	14.1781	1.61409	XPNPEP1	X-prolyl aminopeptidase 1
ILMN_1710808	6.31e-08	1.13e-10	-7.29361	14.0401	-5.50635	MPZ	myelin protein zero
ILMN_1685699	7.95e-08	1.46e-10	-7.12436	13.7705	-7.51809	PRSS3	protease, serine 3
ILMN_1704665	1.05e-07	1.97e-10	-7.04131	13.4795	-6.22879	GPM6B	glycoprotein M6B
ILMN_1761968	1.21e-07	2.34e-10	-6.97331	13.3064	-2.68981	PPP1R14A	protein phosphatase 1 regulatory inhibitor subunit 14A
ILMN_1656395	1.7e-07	3.37e-10	-7.12045	13.0075	-5.47982	MYOT	myotilin
ILMN_1727050	1.74e-07	3.53e-10	6.89035	12.9142	2.56823	PPFIA1	PTPRF interacting protein alpha 1
ILMN_1731157	1.79e-07	3.71e-10	-6.8802	12.8663	-2.64356	MYOZ1	myozenin 1
ILMN_1720935	2.11e-07	4.48e-10	-6.84184	12.6857	-3.16844	NRXN3	neurexin 3
ILMN_1806177	2.98e-07	6.56e-10	-6.76395	12.3202	-2.80632	SNAI1	snail family transcriptional repressor 1
ILMN_1680251	2.98e-07	6.6e-10	-6.76277	12.3147	-3.49532	SORCS1	sortilin related VPS10 domain containing receptor 1
ILMN_1675947	3.37e-07	7.95e-10	-7.46605	12.2803	-5.83086	MT3	metallothionein 3
ILMN_1664630	3.22e-07	7.29e-10	6.76599	12.2254	4.34536	CHEK1	checkpoint kinase 1
ILMN_1782327	3.29e-07	7.6e-10	6.74552	12.1738	3.63723	CTBP1	C-terminal binding protein 1
ILMN_1765310	3.97e-07	9.54e-10	-6.73514	11.9736	-5.39299	TCEAL2	transcription elongation factor A like 2
ILMN_1742034	5.4e-07	1.35e-09	-7.27062	11.7684	-4.97162	MYOC	myocilin
ILMN_1747412	5.4e-07	1.34e-09	6.617	11.6351	2.03004	DPP3	dipeptidyl peptidase 3
ILMN_1795852	6.8e-07	1.76e-09	6.57118	11.3717	3.3573	CCNE1	cyclin E1
ILMN_1782032	6.8e-07	1.8e-09	6.59015	11.365	3.42546	ASH1L	ASH1 like histone lysine methyltransferase
ILMN_1665403	8.45e-07	2.42e-09	-8.71565	11.3302	-11.1021	CELA3B	chymotrypsin like elastase family member 3B
ILMN_1700337	7.45e-07	2e-09	6.55591	11.254	5.41322	TROAP	trophinin associated protein
ILMN_1667578	7.45e-07	2.04e-09	-6.53059	11.2352	-1.81095	DUSP26	dual specificity phosphatase 26 (putative)
ILMN_1663332	7.45e-07	2.07e-09	6.52718	11.2195	3.36092	KIAA0101	KIAA0101
ILMN_1673566	8.45e-07	2.44e-09	-6.49285	11.0613	-3.74087	ADAMTS1	ADAM metallopeptidase with thrombospondin type 1 motif 1
ILMN_1733950	6.76e-07	1.72e-09	6.65086	11.0575	5.38478	BUB1B	BUB1 mitotic checkpoint serine/threonine kinase B
ILMN_1659651	8.45e-07	2.47e-09	6.49581	11.0526	1.69908	TOP1MT	topoisomerase (DNA) I, mitochondrial
ILMN_1744968	8.91e-07	2.65e-09	-6.47633	10.9853	-3.45998	KCNAB1	potassium voltage-gated channel subfamily A member regulatory beta subunit 1
ILMN_1685596	1.22e-06	3.84e-09	-8.80095	10.8977	-12.0408	PNLIP	pancreatic lipase
ILMN_1696380	1.03e-06	3.11e-09	-6.56661	10.865	-6.0758	GHRL	ghrelin/obestatin prepropeptide
ILMN_1682336	1.12e-06	3.44e-09	6.42144	10.7333	2.45038	MASTL	microtubule associated serine/threonine kinase like
ILMN_1671704	1.19e-06	3.69e-09	6.41218	10.6696	2.92233	SLC37A3	solute carrier family 37 member 3
ILMN_1676822	1.56e-06	5.07e-09	-6.41792	10.386	-5.60785	C2orf40	chromosome 2 open reading frame 40
ILMN_1735798	1.56e-06	4.99e-09	6.34885	10.381	2.48787	OSBPL3	oxysterol binding protein like 3
ILMN_1701424	1.57e-06	5.17e-09	6.33643	10.345	4.82254	LAMC2	laminin subunit gamma 2
ILMN_1673843	1.77e-06	5.94e-09	6.30723	10.2122	4.71298	CST2	cystatin SA
ILMN_1660732	1.81e-06	6.16e-09	-6.30929	10.1809	-4.18955	PPP2R2B	protein phosphatase 2 regulatory subunit Bbeta
ILMN_1717936	1.81e-06	6.23e-09	-6.30693	10.1702	-4.51562	RERGL	RERG like
ILMN_1660306	1.95e-06	6.79e-09	-6.43196	10.1271	-4.39672	ITGA8	integrin subunit alpha 8
ILMN_1761836	1.99e-06	7.04e-09	6.2763	10.0519	2.90743	ORC1	origin recognition complex subunit 1
ILMN_1658660	2.12e-06	7.6e-09	-6.4679	10.0363	-5.00631	ACTC1	actin, alpha, cardiac muscle 1
ILMN_1781388	2.21e-06	8.02e-09	-6.24851	9.92636	-3.86598	PGM5	phosphoglucomutase 5
ILMN_1665492	2.44e-06	9.15e-09	-6.23993	9.8069	-3.05151	SORCS1	sortilin related VPS10 domain containing receptor 1
ILMN_1751776	2.44e-06	9.16e-09	6.22498	9.80517	3.93796	CKAP2L	cytoskeleton associated protein 2 like
ILMN_1695827	2.44e-06	9.2e-09	6.21492	9.7941	1.42137	PPP1CA	protein phosphatase 1 catalytic subunit alpha
ILMN_1653750	2.54e-06	9.7e-09	-6.30156	9.77242	-4.96057	SOX10	SRY-box 10
ILMN_1722329	2.75e-06	1.09e-08	-6.41235	9.69518	-5.43504	CASQ2	calsequestrin 2
ILMN_1744129	2.65e-06	1.03e-08	6.19634	9.6913	2.60863	DTX2	deltex E3 ubiquitin ligase 2
ILMN_1708093	2.68e-06	1.05e-08	6.18741	9.67004	1.85307	ARHGEF5	Rho guanine nucleotide exchange factor 5
ILMN_1655821	2.75e-06	1.1e-08	6.17686	9.62252	2.79497	CAPG	capping actin protein, gelsolin like
ILMN_1683279	3.45e-06	1.4e-08	6.12597	9.39396	2.59651	PEX6	peroxisomal biogenesis factor 6
ILMN_1810054	4.41e-06	1.81e-08	-6.11259	9.16068	-3.85216	CNN1	calponin 1
ILMN_1756043	4.42e-06	1.85e-08	6.08356	9.13925	4.05131	WDHD1	WD repeat and HMG-box DNA binding protein 1
ILMN_1737788	4.42e-06	1.84e-08	6.06723	9.13124	3.56504	CENPM	centromere protein M
ILMN_1812824	4.69e-06	1.99e-08	-6.05925	9.06027	-3.3841	SST	somatostatin
ILMN_1708077	4.97e-06	2.15e-08	6.03857	8.98615	1.13646	DAXX	death domain associated protein
ILMN_1663112	4.97e-06	2.15e-08	-6.03786	8.98299	-4.35599	ADAMTS8	ADAM metallopeptidase with thrombospondin type 1 motif 8
ILMN_1781307	5.73e-06	2.51e-08	-6.00489	8.83677	-2.55184	HEY2	hes related family bHLH transcription factor with YRPW motif 2
ILMN_1782305	6e-06	2.66e-08	-5.98826	8.77999	-3.76333	NR4A2	nuclear receptor subfamily 4 group A member 2
ILMN_1701783	7.59e-06	3.58e-08	-7.07157	8.7661	-4.39536	DCT	dopachrome tautomerase
ILMN_1790508	6.36e-06	2.91e-08	-6.05703	8.72376	-4.58762	KCNA5	potassium voltage-gated channel subfamily A member 5
ILMN_1703858	6.36e-06	2.88e-08	5.97128	8.70479	1.70358	GGCT	gamma-glutamylcyclotransferase
ILMN_1794539	6.36e-06	2.89e-08	5.97015	8.6998	3.55389	KIF11	kinesin family member 11
ILMN_1674645	6.72e-06	3.1e-08	5.99942	8.65723	3.66385	TSGA10	testis specific 10
ILMN_1703906	6.95e-06	3.25e-08	5.94542	8.5904	2.78793	HJURP	Holliday junction recognition protein
ILMN_1729973	7.85e-06	3.74e-08	5.91886	8.45703	2.17497	ZC3HAV1	zinc finger CCCH-type containing, antiviral 1
ILMN_1751378	7.99e-06	3.84e-08	5.90897	8.42964	0.914953	RARS	arginyl-tRNA synthetase
ILMN_1805842	8.07e-06	3.92e-08	-5.90453	8.41009	-3.53132	FHL1	four and a half LIM domains 1
ILMN_1789463	8.58e-06	4.21e-08	-5.88929	8.34305	-3.04516	FXYD1	FXYD domain containing ion transport regulator 1
ILMN_1778985	9.84e-06	4.92e-08	-5.8592	8.19532	-1.95293	PRMT9	protein arginine methyltransferase 9
ILMN_1696450	9.84e-06	5.01e-08	-5.89833	8.1925	-3.75522	KLK1	kallikrein 1
ILMN_1691339	9.84e-06	4.96e-08	-5.85326	8.1849	-2.23691	CLEC1A	C-type lectin domain family 1 member A
ILMN_1660086	9.84e-06	4.97e-08	-5.85281	8.18292	-3.65646	MYH11	myosin heavy chain 11
ILMN_1655163	1.04e-05	5.36e-08	5.83655	8.11174	1.37661	STK24	serine/threonine kinase 24
ILMN_1789841	1.16e-05	6.04e-08	5.81056	7.99815	1.39462	ZNF217	zinc finger protein 217
ILMN_1749226	1.23e-05	6.43e-08	5.80442	7.94088	6.10668	MMP11	matrix metallopeptidase 11
ILMN_1712803	1.23e-05	6.49e-08	5.80615	7.93278	3.40963	CCNB1	cyclin B1
ILMN_1669023	1.32e-05	7.08e-08	-5.791	7.85143	-3.77896	FHL5	four and a half LIM domains 5
ILMN_1779857	1.32e-05	7.11e-08	-5.77474	7.842	-3.01828	KLF4	Kruppel like factor 4
ILMN_1751444	1.37e-05	7.42e-08	5.76919	7.81876	3.92871	NCAPG	non-SMC condensin I complex subunit G
ILMN_1736090	1.39e-05	7.66e-08	5.76222	7.78867	3.1147	BUB1	BUB1 mitotic checkpoint serine/threonine kinase
ILMN_1735438	1.44e-05	8.02e-08	-5.89438	7.77816	-6.07848	GPM6B	glycoprotein M6B
ILMN_1660841	1.39e-05	7.67e-08	-5.75813	7.7698	-2.12284
ILMN_1763790	1.73e-05	9.76e-08	5.71255	7.56428	3.13194	SIGLEC10	sialic acid binding Ig like lectin 10
ILMN_1752294	1.72e-05	9.66e-08	-5.71107	7.55145	-2.96234	PCDH9	protocadherin 9
ILMN_1813361	1.78e-05	1.01e-07	-5.80129	7.54093	-4.9977	ANGPTL7	angiopoietin like 7
ILMN_1749848	1.84e-05	1.06e-07	-5.75777	7.48378	-4.0338	SLC35F1	solute carrier family 35 member F1
ILMN_1806403	1.8e-05	1.04e-07	-5.69175	7.48224	-2.75999	RASL12	RAS like family 12
ILMN_1702817	1.86e-05	1.08e-07	5.70051	7.4641	3.52294	B3GNTL1	UDP-GlcNAc:betaGal beta-1,3-N-acetylglucosaminyltransferase-like 1
ILMN_1785523	2.05e-05	1.22e-07	-5.68295	7.34133	-3.84568	PLN	phospholamban
ILMN_1671092	2.05e-05	1.22e-07	-5.65561	7.32642	-3.19635	SOX17	SRY-box 17
ILMN_1782086	2.05e-05	1.23e-07	-5.65357	7.31765	-2.60038	AOC3	amine oxidase, copper containing 3
ILMN_1724837	2.05e-05	1.24e-07	5.65668	7.31724	1.63816	ZC3HAV1	zinc finger CCCH-type containing, antiviral 1
ILMN_1766264	2.17e-05	1.33e-07	-5.70627	7.26939	-5.48553	PI16	peptidase inhibitor 16
ILMN_1726720	2.17e-05	1.33e-07	5.63699	7.24634	2.28677	NUSAP1	nucleolar and spindle associated protein 1
ILMN_1691119	2.17e-05	1.34e-07	-5.63489	7.23733	-1.88333	RNF122	ring finger protein 122
ILMN_1691048	2.21e-05	1.37e-07	5.62963	7.21476	3.4938	SLC22A18AS	solute carrier family 22 member 18 antisense
ILMN_1667468	2.28e-05	1.43e-07	-5.62107	7.178	-2.55584	DACT3	dishevelled binding antagonist of beta catenin 3
ILMN_1790537	2.32e-05	1.46e-07	5.61556	7.15438	2.74659	RMI2	RecQ mediated genome instability 2
ILMN_1718941	2.4e-05	1.52e-07	-5.60998	7.11706	-2.63489	JPH2	junctophilin 2
ILMN_1667966	2.63e-05	1.7e-07	-5.58287	7.01446	-2.39663	FAM129A	family with sequence similarity 129 member A
ILMN_1729596	2.63e-05	1.71e-07	5.58097	7.00634	2.43192	INF2	inverted formin, FH2 and WH2 domain containing
ILMN_1749792	2.63e-05	1.71e-07	-5.5807	7.00516	-2.74312	SORBS1	sorbin and SH3 domain containing 1
ILMN_1770653	2.64e-05	1.73e-07	5.57844	6.99552	2.6057	MAL2	mal, T-cell differentiation protein 2 (gene/pseudogene)
ILMN_1751439	3.51e-05	2.32e-07	-5.57431	6.74113	-3.7691	EMX2	empty spiracles homeobox 2
ILMN_1810716	3.65e-05	2.43e-07	-5.50601	6.67472	-3.62022	GFRA3	GDNF family receptor alpha 3
ILMN_1725862	3.74e-05	2.51e-07	5.49551	6.64274	0.998753	USP3	ubiquitin specific peptidase 3
ILMN_1657502	3.89e-05	2.66e-07	-5.49181	6.58929	-3.19679	MRGPRF	MAS related GPR family member F
ILMN_1717990	3.89e-05	2.65e-07	-5.4826	6.58809	-3.54779	CALD1	caldesmon 1
ILMN_1782863	3.77e-05	2.54e-07	5.59209	6.55499	5.82836	FAM83B	family with sequence similarity 83 member B
ILMN_1758378	4.37e-05	3.03e-07	5.47669	6.50679	2.82676
ILMN_1815759	4.22e-05	2.91e-07	5.46223	6.50199	1.58163	CTDP1	CTD phosphatase subunit 1
ILMN_1705210	4.48e-05	3.13e-07	-5.44898	6.43403	-2.30314	GRASP	general receptor for phosphoinositides 1 associated scaffold protein
ILMN_1662927	4.63e-05	3.25e-07	5.43696	6.39543	1.87259	AP1S1	adaptor related protein complex 1 sigma 1 subunit
ILMN_1773307	4.71e-05	3.33e-07	-5.43147	6.37234	-1.84456	NAP1L5	nucleosome assembly protein 1 like 5
ILMN_1653824	4.75e-05	3.38e-07	5.42787	6.35719	4.08953	LAMC2	laminin subunit gamma 2
ILMN_1717702	5.02e-05	3.62e-07	-5.46229	6.31289	-3.49191	KCNK17	potassium two pore domain channel subfamily K member 17
ILMN_1761915	4.98e-05	3.57e-07	5.41899	6.30802	2.52208	BRWD1	bromodomain and WD repeat domain containing 1
ILMN_1764628	5.05e-05	3.67e-07	5.41286	6.28235	1.37919	LYPLA2	lysophospholipase II
ILMN_1770454	5.24e-05	3.83e-07	5.40005	6.24033	2.18683
ILMN_1657554	5.49e-05	4.05e-07	-5.39043	6.18843	-2.24446
ILMN_1748352	5.49e-05	4.07e-07	5.38942	6.1842	3.9769	CTSV	cathepsin V
ILMN_1679546	5.55e-05	4.14e-07	5.38237	6.16624	1.98803	TES	testin LIM domain protein
ILMN_1703123	5.98e-05	4.48e-07	-5.36419	6.0902	-2.25793	CSRNP1	cysteine and serine rich nuclear protein 1
ILMN_1660808	6e-05	4.53e-07	-5.36193	6.08075	-2.31198	WFDC1	WAP four-disulfide core domain 1
ILMN_1803398	6.29e-05	4.77e-07	-5.34994	6.03072	-1.27426	SRF	serum response factor
ILMN_1811921	7.01e-05	5.35e-07	-5.3237	5.9214	-1.37549	CSRP1	cysteine and glycine rich protein 1
ILMN_1686097	7.01e-05	5.39e-07	5.32218	5.91507	3.79721	TOP2A	topoisomerase (DNA) II alpha
ILMN_1681462	8.01e-05	6.49e-07	-5.69364	5.89506	-8.38137	REG1B	regenerating family member 1 beta
ILMN_1721283	7.13e-05	5.54e-07	-5.31868	5.88947	-3.67222	HSPB6	heat shock protein family B (small) member 6
ILMN_1810725	7.13e-05	5.54e-07	-5.31569	5.88808	-2.40181	FAM129A	family with sequence similarity 129 member A
ILMN_1683664	7.18e-05	5.62e-07	5.31274	5.87584	1.88326	FAM60A	family with sequence similarity 60 member A
ILMN_1750644	7.18e-05	5.65e-07	-5.31139	5.87022	-1.82864	KANK3	KN motif and ankyrin repeat domains 3
ILMN_2038777	7.23e-05	5.72e-07	5.30845	5.858	1.06616	ACTB	actin beta
ILMN_1795228	7.25e-05	5.77e-07	-5.30642	5.84958	-1.05955	ZFAND5	zinc finger AN1-type containing 5
ILMN_1715065	7.72e-05	6.19e-07	5.30886	5.79122	1.79439	ZNF580	zinc finger protein 580
ILMN_1665994	7.88e-05	6.35e-07	-5.28762	5.76078	-2.87222	PMEL	premelanosome protein
ILMN_1698427	8.34e-05	6.81e-07	5.27163	5.69472	2.23918	TMUB2	transmembrane and ubiquitin like domain containing 2
ILMN_1679666	8.59e-05	7.09e-07	-5.33398	5.68665	-6.88377	SCGB3A1	secretoglobin family 3A member 1
ILMN_1716461	8.4e-05	6.89e-07	-5.26875	5.68281	-2.93884	LGI4	leucine rich repeat LGI family member 4
ILMN_1715684	8.84e-05	7.34e-07	5.25431	5.62327	3.94549	LAMB3	laminin subunit beta 3
ILMN_1699440	9.09e-05	7.58e-07	-5.24391	5.59093	-1.56954	ZBTB47	zinc finger and BTB domain containing 47
ILMN_1762654	9.1e-05	7.63e-07	5.24236	5.58453	2.04813	PAFAH1B3	platelet activating factor acetylhydrolase 1b catalytic subunit 3
ILMN_1789244	9.24e-05	7.8e-07	-5.23746	5.56431	-3.18028	SOX8	SRY-box 8
ILMN_1777233	9.58e-05	8.13e-07	5.23061	5.52573	2.79045	E2F2	E2F transcription factor 2
ILMN_1809047	9.91e-05	8.46e-07	5.2216	5.48873	1.9015	TBRG4	transforming growth factor beta regulator 4
ILMN_1751062	0.000102	8.81e-07	-5.2468	5.4649	-4.44524	SCARA5	scavenger receptor class A member 5
ILMN_1801939	0.000102	8.8e-07	5.20963	5.44986	3.41784	CCNB2	cyclin B2
ILMN_1783276	0.000103	9.01e-07	-5.2041	5.42714	-2.30952	NEXN	nexilin F-actin binding protein
ILMN_1720053	0.000103	9.02e-07	5.20656	5.42701	1.12348	ZFAND3	zinc finger AN1-type containing 3
ILMN_1708107	0.000107	9.38e-07	-5.20038	5.39139	-4.80744	DPT	dermatopontin
ILMN_1710217	0.000134	1.23e-06	-5.84291	5.38962	-4.26133	MLANA	melan-A
ILMN_1690325	0.000107	9.46e-07	5.19567	5.38241	1.77554	NFYA	nuclear transcription factor Y subunit alpha
ILMN_1660275	0.000108	9.56e-07	5.19041	5.37101	1.14455	LDAH	lipid droplet associated hydrolase
ILMN_1679797	0.000108	9.65e-07	-5.18829	5.36229	-1.66832	ADARB1	adenosine deaminase, RNA specific B1
ILMN_1799667	0.000108	9.68e-07	5.19024	5.36019	2.66581	KIF4A	kinesin family member 4A
ILMN_1661309	0.000125	1.13e-06	-5.3874	5.31208	-4.97665	XKR4	XK related 4
ILMN_1813638	0.000117	1.05e-06	5.16785	5.27864	2.71454	IQGAP3	IQ motif containing GTPase activating protein 3
ILMN_1790098	0.000125	1.14e-06	-5.18908	5.22084	-5.20446	OGN	osteoglycin
ILMN_1684357	0.000129	1.18e-06	-5.15027	5.17698	-2.16931	LINC00341	long intergenic non-protein coding RNA 341
ILMN_1652390	0.000136	1.25e-06	5.13312	5.14732	4.90612	GJB3	gap junction protein beta 3
ILMN_1702255	0.000136	1.26e-06	-5.18743	5.13593	-2.87306	KCNT1	potassium sodium-activated channel subfamily T member 1
ILMN_1711504	0.000136	1.28e-06	-5.13152	5.10097	-2.24878	NRXN1	neurexin 1
ILMN_1711470	0.000136	1.28e-06	5.12321	5.09666	2.30089	UBE2T	ubiquitin conjugating enzyme E2 T
ILMN_1798224	0.000139	1.31e-06	5.12766	5.07524	2.95848	KDM5C	lysine demethylase 5C
ILMN_1688670	0.000147	1.4e-06	5.10513	5.04421	3.72301	CDCP1	CUB domain containing protein 1
ILMN_1734653	0.000145	1.37e-06	5.10624	5.02773	4.41207	FNDC1	fibronectin type III domain containing 1
ILMN_1806434	0.000148	1.41e-06	5.10498	5.00348	3.78352	PAQR5	progestin and adipoQ receptor family member 5
ILMN_1714730	0.000149	1.44e-06	5.09584	4.98555	3.56263
ILMN_1713088	0.000149	1.44e-06	5.09508	4.98246	2.01043	MSI2	musashi RNA binding protein 2
ILMN_1734909	0.000166	1.67e-06	-5.36281	4.9697	-3.99464	CUZD1	CUB and zona pellucida like domains 1
ILMN_1719170	0.000153	1.49e-06	5.08932	4.94975	3.34563	WBSCR27	Williams Beuren syndrome chromosome region 27
ILMN_1695414	0.000157	1.55e-06	5.09131	4.94926	3.69594	ASF1B	anti-silencing function 1B histone chaperone
ILMN_1712628	0.000153	1.5e-06	5.08833	4.94573	2.12704	GTF2IRD1	GTF2I repeat domain containing 1
ILMN_1777190	0.000153	1.5e-06	-5.08507	4.94193	-2.4715	CFD	complement factor D
ILMN_1676795	0.000182	1.9e-06	-5.48601	4.90753	-4.11616	REG3G	regenerating family member 3 gamma
ILMN_1709294	0.000166	1.68e-06	5.0645	4.89659	4.01896	CDCA8	cell division cycle associated 8
ILMN_1675062	0.000163	1.62e-06	-5.06771	4.87172	-2.57978	MYL9	myosin light chain 9
ILMN_1724941	0.000163	1.62e-06	5.06984	4.87109	2.97821	CDCP1	CUB domain containing protein 1
ILMN_1684982	0.000165	1.65e-06	-5.0636	4.85514	-3.05425	PDK4	pyruvate dehydrogenase kinase 4
ILMN_1811470	0.000166	1.68e-06	5.05928	4.83771	2.96885	PLEK2	pleckstrin 2
ILMN_1660114	0.000174	1.79e-06	-5.06619	4.78747	-4.40134	MMRN1	multimerin 1
ILMN_1683176	0.000174	1.77e-06	-5.04663	4.78668	-4.01458	FXYD1	FXYD domain containing ion transport regulator 1
ILMN_1696752	0.000174	1.79e-06	5.04436	4.77755	1.6747	ZC3H3	zinc finger CCCH-type containing 3
ILMN_1792494	0.000181	1.87e-06	5.0342	4.73664	2.2517	TPX2	TPX2, microtubule nucleation factor
ILMN_1672605	0.000182	1.89e-06	-5.03133	4.72512	-2.5908	MTURN	maturin, neural progenitor differentiation regulator homolog (Xenopus)
ILMN_1708348	0.000184	1.92e-06	5.02735	4.70911	3.36766	ADAM8	ADAM metallopeptidase domain 8
ILMN_1669479	0.000189	2.06e-06	5.01852	4.70514	3.30244	MEST	mesoderm specific transcript
ILMN_1679092	0.000184	1.94e-06	-5.02773	4.70168	-2.13285	RAB9B	RAB9B, member RAS oncogene family
ILMN_1732296	0.000184	1.94e-06	-5.02476	4.69869	-1.9625	ID3	inhibitor of DNA binding 3, HLH protein
ILMN_1684726	0.000187	1.98e-06	5.02267	4.68137	2.40903	C2orf27A	chromosome 2 open reading frame 27A
ILMN_1772155	0.000189	2.01e-06	-5.01656	4.66578	-1.52792	ZNF536	zinc finger protein 536
ILMN_1802441	0.000189	2.05e-06	-5.01674	4.64856	-7.33887	REG1A	regenerating family member 1 alpha
ILMN_1715991	0.000189	2.07e-06	-5.01026	4.64047	-2.39474	SDPR	serum deprivation response
ILMN_1772189	0.000189	2.07e-06	5.01235	4.63999	2.23891	ABCD1	ATP binding cassette subfamily D member 1
ILMN_1796180	0.000189	2.07e-06	-5.00978	4.63858	-1.27901	CRY2	cryptochrome circadian clock 2
ILMN_1753464	0.000189	2.07e-06	5.00962	4.63792	1.90878	C17orf53	chromosome 17 open reading frame 53
ILMN_1750790	0.000192	2.11e-06	-5.03004	4.63362	-3.38244	GSTM5	glutathione S-transferase mu 5
ILMN_1738773	0.000196	2.16e-06	-5.04928	4.6201	-3.53241	HRC	histidine rich calcium binding protein
ILMN_1763704	0.000204	2.26e-06	-4.98938	4.55684	-2.35796	RGS11	regulator of G-protein signaling 11
ILMN_1786444	0.000204	2.27e-06	-4.9934	4.55533	-2.74087	LPL	lipoprotein lipase
ILMN_1737475	0.000212	2.37e-06	4.9833	4.51506	2.33137
ILMN_1783598	0.000214	2.4e-06	-4.97693	4.49845	-1.66417	CAB39L	calcium binding protein 39 like
ILMN_1737005	0.000219	2.47e-06	4.96843	4.47316	1.41207	SMG9	SMG9, nonsense mediated mRNA decay factor
ILMN_1660519	0.000224	2.54e-06	-4.96426	4.44796	-2.91006	C3orf70	chromosome 3 open reading frame 70
ILMN_1815361	0.000231	2.62e-06	4.95369	4.41441	1.11244	XIAP	X-linked inhibitor of apoptosis
ILMN_1727249	0.000232	2.65e-06	4.96379	4.41052	2.21001	FAM21C	family with sequence similarity 21 member C
ILMN_1683450	0.000232	2.65e-06	4.95106	4.40392	2.77706	CDCA5	cell division cycle associated 5
ILMN_1727466	0.000233	2.69e-06	-4.94816	4.39239	-2.23796	KCNMB4	potassium calcium-activated channel subfamily M regulatory beta subunit 4
ILMN_1811590	0.000267	3.18e-06	-5.24354	4.38321	-4.67454	S100B	S100 calcium binding protein B
ILMN_1680973	0.000237	2.74e-06	-4.94618	4.37606	-2.91147	FOXF1	forkhead box F1
ILMN_1787825	0.000239	2.77e-06	-4.94828	4.36712	-4.19269	CDH19	cadherin 19
ILMN_1653103	0.000268	3.19e-06	5.62506	4.36233	6.61536	CNBD2	cyclic nucleotide binding domain containing 2
ILMN_1651767	0.000241	2.8e-06	4.93805	4.35219	1.57282	MKL1	megakaryoblastic leukemia (translocation) 1
ILMN_1782389	0.000249	2.91e-06	4.92936	4.31763	1.98027	LAD1	ladinin 1
ILMN_1731775	0.000249	2.92e-06	4.92789	4.31179	1.53019	PAIP1	poly(A) binding protein interacting protein 1
ILMN_1710644	0.000253	2.98e-06	4.9236	4.29479	2.44214	MARVELD3	MARVEL domain containing 3
ILMN_1655642	0.000264	3.12e-06	4.91719	4.25275	2.59644	FANCI	Fanconi anemia complementation group I
ILMN_1723522	0.000273	3.27e-06	-4.90354	4.20712	-2.96523	APOLD1	apolipoprotein L domain containing 1
ILMN_1719031	0.00028	3.38e-06	-4.95058	4.20279	-2.82099	AMY1C	amylase, alpha 1C (salivary)
ILMN_1760303	0.000278	3.34e-06	-4.8964	4.18707	-1.67119	PIK3R1	phosphoinositide-3-kinase regulatory subunit 1
ILMN_1794742	0.000281	3.43e-06	-4.89914	4.16456	-2.36723	HES5	hes family bHLH transcription factor 5
ILMN_1773006	0.000281	3.42e-06	-4.89056	4.16398	-4.02581	FABP4	fatty acid binding protein 4
ILMN_1743137	0.000281	3.42e-06	4.89039	4.16333	0.930222	PRRC2C	proline rich coiled-coil 2C
ILMN_1778681	0.000283	3.47e-06	-4.88944	4.1515	-2.87508	EBF1	early B-cell factor 1
ILMN_1676336	0.000283	3.48e-06	4.88607	4.14625	2.11675	NCEH1	neutral cholesterol ester hydrolase 1
ILMN_1784655	0.00029	3.59e-06	4.87922	4.11921	1.95104	TLCD1	TLC domain containing 1
ILMN_1684755	0.000295	3.65e-06	-4.89727	4.11243	-2.97809	KAZALD1	Kazal type serine peptidase inhibitor domain 1
ILMN_1751328	0.000296	3.68e-06	4.87267	4.09339	2.25531	FAM83H	family with sequence similarity 83 member H
ILMN_1699365	0.000313	3.93e-06	4.87682	4.07687	3.82373	SLC30A6	solute carrier family 30 member 6
ILMN_1704196	0.000312	3.9e-06	4.85881	4.03884	2.35941	DSG2	desmoglein 2
ILMN_1677955	0.000337	4.32e-06	4.84617	4.01596	3.36742	ENTPD6	ectonucleoside triphosphate diphosphohydrolase 6 (putative)
ILMN_1669362	0.000321	4.04e-06	-4.85059	4.00651	-2.75558	IGFBP6	insulin like growth factor binding protein 6
ILMN_1715540	0.000321	4.06e-06	-4.84943	4.00196	-1.67656	TRAIP	TRAF interacting protein
ILMN_1747016	0.000351	4.53e-06	4.83944	3.98911	5.58537	CEP55	centrosomal protein 55
ILMN_1697864	0.000326	4.14e-06	4.84467	3.98324	1.32877	CXorf38	chromosome X open reading frame 38
ILMN_1777882	0.000327	4.17e-06	-4.84317	3.97735	-2.09283	ARHGAP15	Rho GTPase activating protein 15
ILMN_1671295	0.00033	4.21e-06	-4.84057	3.96714	-2.20418	CCDC3	coiled-coil domain containing 3
ILMN_1808238	0.000348	4.48e-06	-4.82564	3.90862	-2.64182	RBPMS2	RNA binding protein with multiple splicing 2
ILMN_1786039	0.000361	4.7e-06	4.81415	3.86366	0.920351	RNF34	ring finger protein 34
ILMN_1688725	0.000361	4.7e-06	4.81399	3.86302	1.05783	UTP14A	UTP14A small subunit processome component
ILMN_1786065	0.000363	4.74e-06	4.81182	3.85452	3.11464	UHRF1	ubiquitin like with PHD and ring finger domains 1
ILMN_1765558	0.000366	4.8e-06	4.81109	3.84408	2.00307	NPAS2	neuronal PAS domain protein 2
ILMN_1813139	0.000366	4.81e-06	-4.80825	3.84058	-1.92545	ANKDD1A	ankyrin repeat and death domain containing 1A
ILMN_1671046	0.000376	4.96e-06	-4.801	3.81225	-1.61296	HSPB2	heat shock protein family B (small) member 2
ILMN_1735211	0.000474	6.95e-06	-5.46296	3.8087	-4.36876	RBPJL	recombination signal binding protein for immunoglobulin kappa J region like
ILMN_1702863	0.000394	5.28e-06	4.80228	3.7982	2.35927	VASP	vasodilator-stimulated phosphoprotein
ILMN_1784512	0.000386	5.11e-06	4.79381	3.7842	1.41088	NR2C2AP	nuclear receptor 2C2 associated protein
ILMN_1757631	0.000386	5.13e-06	4.79946	3.78331	2.49754	DBNDD1	dysbindin domain containing 1
ILMN_1779486	0.000393	5.24e-06	4.78788	3.76111	1.08379	FAM126B	family with sequence similarity 126 member B
ILMN_1696827	0.000399	5.36e-06	4.78461	3.74093	1.97038	PARS2	prolyl-tRNA synthetase 2, mitochondrial (putative)
ILMN_1674152	0.000401	5.43e-06	4.79075	3.73368	3.82473	NFKBIB	NFKB inhibitor beta
ILMN_1672350	0.000401	5.41e-06	-4.78426	3.732	-2.73574	JAM2	junctional adhesion molecule 2
ILMN_1768812	0.000403	5.49e-06	-4.78083	3.71867	-2.54499	FXYD6	FXYD domain containing ion transport regulator 6
ILMN_1685636	0.000403	5.51e-06	-4.77785	3.71462	-2.66237	KCNN2	potassium calcium-activated channel subfamily N member 2
ILMN_1677446	0.000403	5.5e-06	4.77593	3.71455	1.87673	TMEM189-UBE2V1	TMEM189-UBE2V1 readthrough
ILMN_1708486	0.00042	5.78e-06	4.78	3.71274	2.79219	CNN2	calponin 2
ILMN_1660654	0.000405	5.55e-06	4.78283	3.71098	2.75618	CDCA2	cell division cycle associated 2
ILMN_1698995	0.000445	6.29e-06	-4.92246	3.67705	-4.78128	DES	desmin
ILMN_1711807	0.000443	6.25e-06	-4.87111	3.6586	-3.5837	ADGRL3	adhesion G protein-coupled receptor L3
ILMN_1815745	0.000424	5.86e-06	4.76081	3.65579	1.89358	SOX4	SRY-box 4
ILMN_1751489	0.000426	5.91e-06	-4.7585	3.64682	-2.98925	ADAMTS4	ADAM metallopeptidase with thrombospondin type 1 motif 4
ILMN_1683300	0.000426	5.92e-06	4.75813	3.6454	1.44556	BAX	BCL2 associated X, apoptosis regulator
ILMN_1715788	0.000428	5.98e-06	-4.76218	3.63887	-2.27012	MMRN2	multimerin 2
ILMN_1803522	0.000428	5.99e-06	4.76208	3.63848	1.76305	PRELID3B	PRELI domain containing 3B
ILMN_1744118	0.000431	6.05e-06	-4.75493	3.62571	-1.88765	ASTN2	astrotactin 2
ILMN_1725250	0.000455	6.55e-06	4.75705	3.59995	4.20666	CCDC50	coiled-coil domain containing 50
ILMN_1658481	0.000475	7e-06	4.72841	3.58807	3.78298
ILMN_1746029	0.000449	6.36e-06	4.74051	3.57711	1.49512	SPATS2	spermatogenesis associated serine rich 2
ILMN_1694778	0.000455	6.5e-06	4.73525	3.55674	1.64379	KRT18	keratin 18
ILMN_1700426	0.000455	6.52e-06	4.73481	3.55503	1.4564	TAGLN2	transgelin 2
ILMN_1660017	0.000455	6.54e-06	4.73812	3.55341	2.00978	PRR5	proline rich 5
ILMN_1780357	0.000464	6.69e-06	-4.72839	3.53022	-1.65551	PRRT1	proline rich transmembrane protein 1
ILMN_1758939	0.000469	6.78e-06	4.72501	3.51714	1.37177	RIPK2	receptor interacting serine/threonine kinase 2
ILMN_1655614	0.000469	6.81e-06	4.72389	3.51281	1.67672	DSP	desmoplakin
ILMN_1730706	0.000469	6.83e-06	-4.72339	3.51088	-4.35965	FOSB	FosB proto-oncogene, AP-1 transcription factor subunit
ILMN_1776917	0.000474	6.95e-06	4.71889	3.49352	1.3585	PKN1	protein kinase N1
ILMN_1733115	0.000475	7.01e-06	4.71697	3.48608	1.2725	RALGAPB	Ral GTPase activating protein non-catalytic beta subunit
ILMN_1733811	0.000477	7.06e-06	4.71509	3.47884	1.8077	JUP	junction plakoglobin
ILMN_1789505	0.000478	7.09e-06	-4.71412	3.47512	-1.86958	ITPR1	inositol 1,4,5-trisphosphate receptor type 1
ILMN_1759787	0.000481	7.17e-06	-4.7202	3.46963	-2.80301	THBD	thrombomodulin
ILMN_1699623	0.000485	7.26e-06	4.72649	3.46273	3.32069	FAM81A	family with sequence similarity 81 member A
ILMN_1726204	0.000485	7.34e-06	-4.72386	3.4527	-4.39908	SCRG1	stimulator of chondrogenesis 1
ILMN_1709032	0.000485	7.29e-06	-4.70738	3.44911	-0.972787	FYCO1	FYVE and coiled-coil domain containing 1
ILMN_1659660	0.000485	7.3e-06	-4.70696	3.44751	-1.77539	ACVRL1	activin A receptor like type 1
ILMN_1664542	0.000537	8.27e-06	4.71787	3.44581	3.82717	UBE2I	ubiquitin conjugating enzyme E2 I
ILMN_1786125	0.000485	7.33e-06	4.70616	3.4444	2.53951	CCNA2	cyclin A2
ILMN_1657955	0.000564	8.93e-06	4.89615	3.44286	4.21584	FMNL3	formin like 3
ILMN_1732404	0.000494	7.5e-06	4.70692	3.42606	3.47098	C2orf15	chromosome 2 open reading frame 15
ILMN_1805990	0.000494	7.52e-06	4.69971	3.41959	1.39525	BAK1	BCL2 antagonist/killer 1
ILMN_1778917	0.000495	7.56e-06	4.6985	3.41493	1.10315	CDK7	cyclin dependent kinase 7
ILMN_1706194	0.000537	8.34e-06	4.68749	3.40436	3.85332	MCM10	minichromosome maintenance 10 replication initiation factor
ILMN_1699632	0.000542	8.44e-06	4.69408	3.36176	2.47152	RANBP3	RAN binding protein 3
ILMN_1806040	0.000532	8.15e-06	4.67991	3.34344	2.13372	TYMS	thymidylate synthetase
ILMN_1814487	0.000546	8.54e-06	4.67059	3.34011	2.12274	SMARCC2	SWI/SNF related, matrix associated, actin dependent regulator of chromatin subfamily c member 2
ILMN_1705751	0.000537	8.32e-06	4.68582	3.3307	2.8531	GET4	golgi to ER traffic protein 4
ILMN_1690259	0.000537	8.33e-06	4.67467	3.32335	1.63578	RAE1	ribonucleic acid export 1
ILMN_1671076	0.000548	8.64e-06	-4.70131	3.3083	-2.88257	ADGRB3	adhesion G protein-coupled receptor B3
ILMN_1700822	0.000544	8.5e-06	4.66982	3.30474	1.32725	DPP3	dipeptidyl peptidase 3
ILMN_1782944	0.000546	8.57e-06	-4.67409	3.30039	-1.86509	GPR37L1	G protein-coupled receptor 37 like 1
ILMN_1692824	0.000555	8.77e-06	-4.67046	3.27942	-2.74698	ASPA	aspartoacylase
ILMN_1749962	0.000598	9.56e-06	-4.74066	3.24615	-3.20652	NCAM2	neural cell adhesion molecule 2
ILMN_1755123	0.000575	9.17e-06	4.6531	3.23405	1.16575	GBA	glucosylceramidase beta
ILMN_1738006	0.000575	9.16e-06	4.65119	3.23341	1.84385	TNFRSF21	TNF receptor superfamily member 21
ILMN_1711608	0.000631	1.01e-05	-4.62698	3.141	-1.28771	SSBP2	single stranded DNA binding protein 2
ILMN_1718977	0.000632	1.02e-05	-4.62564	3.13592	-1.93201	GADD45B	growth arrest and DNA damage inducible beta
ILMN_1701933	0.000636	1.02e-05	-4.62358	3.12806	-2.62437	SNCA	synuclein alpha
ILMN_1705814	0.000648	1.05e-05	4.61762	3.10539	2.69442	KRT80	keratin 80
ILMN_1651498	0.000648	1.05e-05	-4.61682	3.10234	-3.0621	GADD45G	growth arrest and DNA damage inducible gamma
ILMN_1672200	0.000648	1.06e-05	4.61787	3.09986	1.54987	PPARD	peroxisome proliferator activated receptor delta
ILMN_1718982	0.000648	1.06e-05	-4.61583	3.09856	-1.881	BEST1	bestrophin 1
ILMN_1681356	0.000656	1.07e-05	-4.61586	3.08561	-2.3364	PDE2A	phosphodiesterase 2A
ILMN_1768197	0.000656	1.08e-05	4.6108	3.07944	1.18918	PTBP3	polypyrimidine tract binding protein 3
ILMN_1665696	0.000656	1.08e-05	4.6107	3.07904	1.44064	EFNA4	ephrin A4
ILMN_1657145	0.00066	1.09e-05	-4.61183	3.07034	-2.79741	MEOX1	mesenchyme homeobox 1
ILMN_1783728	0.00066	1.09e-05	4.60807	3.06906	1.15505	TBRG4	transforming growth factor beta regulator 4
ILMN_1751345	0.000689	1.14e-05	4.59661	3.02556	1.76525	AP1S1	adaptor related protein complex 1 sigma 1 subunit
ILMN_1808245	0.000695	1.16e-05	-4.61276	3.02477	-4.12614	SBSPON	somatomedin B and thrombospondin type 1 domain containing
ILMN_1719202	0.000707	1.18e-05	4.58875	2.99577	1.44141	ZNF174	zinc finger protein 174
ILMN_1691364	0.000708	1.18e-05	4.58773	2.9919	1.79459	STAT1	signal transducer and activator of transcription 1
ILMN_1726210	0.000712	1.2e-05	-4.58523	2.98241	-2.272	GPIHBP1	glycosylphosphatidylinositol anchored high density lipoprotein binding protein 1
ILMN_1813836	0.000712	1.2e-05	4.58489	2.98114	0.682697	DARS	aspartyl-tRNA synthetase
ILMN_1794638	0.000732	1.25e-05	-4.6317	2.9757	-4.16169	VIP	vasoactive intestinal peptide
ILMN_1679093	0.000715	1.21e-05	4.58313	2.97447	1.50965	ZNF581	zinc finger protein 581
ILMN_1660806	0.000716	1.21e-05	-4.5819	2.9698	-1.74884	CSRP2	cysteine and glycine rich protein 2
ILMN_1711871	0.000729	1.24e-05	4.5911	2.95803	1.91086
ILMN_1805175	0.000742	1.27e-05	4.57097	2.92848	2.0407	TGFA	transforming growth factor alpha
ILMN_1732158	0.000747	1.28e-05	-4.56801	2.9173	-2.3316	FMO2	flavin containing monooxygenase 2
ILMN_1795325	0.000747	1.29e-05	-4.56727	2.91451	-3.61787	ACTG2	actin, gamma 2, smooth muscle, enteric
ILMN_1782778	0.000785	1.36e-05	4.55413	2.8649	1.59376	UBALD2	UBA like domain containing 2
ILMN_1693653	0.0008	1.39e-05	-4.55439	2.84715	-2.56158	EMCN	endomucin
ILMN_1771558	0.0008	1.39e-05	4.54809	2.84216	1.72097	MCM4	minichromosome maintenance complex component 4
ILMN_1765246	0.000813	1.41e-05	4.54334	2.82429	1.66089	TES	testin LIM domain protein
ILMN_1713550	0.000816	1.42e-05	-4.54184	2.81863	-2.78356	LGR6	leucine rich repeat containing G protein-coupled receptor 6
ILMN_1712075	0.000817	1.43e-05	-4.54076	2.81456	-2.25472	SYNM	synemin
ILMN_1780663	0.000824	1.45e-05	-4.5378	2.80345	-1.71559	KLHL30	kelch like family member 30
ILMN_1720484	0.000824	1.45e-05	-4.53728	2.80149	-1.62237	CRTAP	cartilage associated protein
ILMN_1750401	0.000826	1.46e-05	4.53799	2.79809	0.876038	C17orf62	chromosome 17 open reading frame 62
ILMN_1722845	0.000831	1.47e-05	4.54807	2.79712	3.10707	RAB3B	RAB3B, member RAS oncogene family
ILMN_1740024	0.000837	1.48e-05	-4.54757	2.78839	-2.36466	NAALAD2	N-acetylated alpha-linked acidic dipeptidase 2
ILMN_1765717	0.000903	1.63e-05	4.52604	2.78359	3.57141	CCNF	cyclin F
ILMN_1749044	0.000744	1.27e-05	4.6259	2.77574	8.18642	NECTIN4	nectin cell adhesion molecule 4
ILMN_1754795	0.00084	1.49e-05	4.52994	2.77389	1.56722	FAT1	FAT atypical cadherin 1
ILMN_1776522	0.000854	1.52e-05	4.52496	2.7552	1.47475	SLC50A1	solute carrier family 50 member 1
ILMN_1789990	0.00087	1.55e-05	4.5218	2.73737	1.67248	ARFGEF2	ADP ribosylation factor guanine nucleotide exchange factor 2
ILMN_1736965	0.000878	1.57e-05	4.51683	2.72471	1.49999	SIGIRR	single Ig and TIR domain containing
ILMN_1682099	0.00089	1.6e-05	-4.51271	2.70926	-2.19308	TNFAIP8L3	TNF alpha induced protein 8 like 3
ILMN_1795756	0.001	1.91e-05	4.644	2.70702	7.17201	CNKSR2	connector enhancer of kinase suppressor of Ras 2
ILMN_1771026	0.000891	1.6e-05	4.51196	2.70645	1.05367	GARS	glycyl-tRNA synthetase
ILMN_1740706	0.00108	2.1e-05	-4.88826	2.68164	-4.73088	PMP2	peripheral myelin protein 2
ILMN_1695658	0.000974	1.83e-05	4.49454	2.67538	3.95875	KIF20A	kinesin family member 20A
ILMN_1740609	0.00092	1.67e-05	-4.50427	2.67177	-3.46085
ILMN_1809456	0.000939	1.71e-05	-4.54049	2.67011	-4.15298	CNTFR	ciliary neurotrophic factor receptor
ILMN_1671028	0.00093	1.69e-05	4.49912	2.65838	1.19437	THRAP3	thyroid hormone receptor associated protein 3
ILMN_1770085	0.000939	1.71e-05	-4.49594	2.6465	-2.23705	BTG2	BTG anti-proliferation factor 2
ILMN_1776925	0.000975	1.84e-05	4.49335	2.62961	3.5377	PRSS22	protease, serine 22
ILMN_1779064	0.000957	1.75e-05	4.48986	2.6238	1.35758	KLC2	kinesin light chain 2
ILMN_1762084	0.000964	1.77e-05	-4.48939	2.61625	-4.58952	DNASE1L3	deoxyribonuclease 1 like 3
ILMN_1775269	0.000973	1.79e-05	-4.49181	2.60721	-1.73122	EID1	EP300 interacting inhibitor of differentiation 1
ILMN_1676322	0.000987	1.87e-05	4.47461	2.60409	2.21338	KDF1	keratinocyte differentiation factor 1
ILMN_1724407	0.000973	1.8e-05	4.48311	2.59859	2.05661	TACC3	transforming acidic coiled-coil containing protein 3
ILMN_1665737	0.000973	1.8e-05	4.48272	2.59715	1.78131	UFD1L	ubiquitin fusion degradation 1 like (yeast)
ILMN_1657898	0.000973	1.8e-05	4.48266	2.59694	1.66956	MTFP1	mitochondrial fission process 1
ILMN_1776850	0.001	1.92e-05	-4.56858	2.59525	-3.03462
ILMN_1682176	0.000974	1.82e-05	-4.48009	2.58736	-2.44438	CLEC3B	C-type lectin domain family 3 member B
ILMN_1692731	0.000974	1.82e-05	4.48008	2.58733	1.80093	TTYH3	tweety family member 3
ILMN_1780170	0.000974	1.83e-05	-4.48083	2.58433	-5.35575	APOD	apolipoprotein D
ILMN_1707493	0.000974	1.83e-05	4.48049	2.58308	1.41838	RCC1	regulator of chromosome condensation 1
ILMN_1668748	0.000987	1.87e-05	4.47576	2.56546	1.70569	MED15	mediator complex subunit 15
ILMN_1679693	0.000987	1.88e-05	4.47435	2.56025	1.71855	TMEM87B	transmembrane protein 87B
ILMN_1753286	0.00111	2.18e-05	4.4777	2.55783	3.66898	MYO19	myosin XIX
ILMN_1789692	0.001	1.91e-05	4.47528	2.54592	2.16601	MARK2	microtubule affinity regulating kinase 2
ILMN_1690690	0.00101	1.94e-05	4.46538	2.52689	0.986067	SEC23IP	SEC23 interacting protein
ILMN_1713014	0.00104	1.99e-05	4.4574	2.50293	2.49521	IGSF3	immunoglobulin superfamily member 3
ILMN_1741782	0.00104	2e-05	4.45592	2.49743	1.12663	SS18	SS18, nBAF chromatin remodeling complex subunit
ILMN_1752665	0.00106	2.04e-05	4.45132	2.48035	2.2082	ELMO3	engulfment and cell motility 3
ILMN_1701774	0.000974	1.83e-05	4.91359	2.47552	7.55931	AP3M1	adaptor related protein complex 3 mu 1 subunit
ILMN_1766914	0.00107	2.07e-05	-4.44783	2.4674	-3.23604	MFAP4	microfibrillar associated protein 4
ILMN_1734867	0.00111	2.16e-05	4.4367	2.42614	1.67197	NR2C1	nuclear receptor subfamily 2 group C member 1
ILMN_1680010	0.00111	2.17e-05	4.43595	2.42336	1.21846	KIAA0753	KIAA0753
ILMN_1695961	0.00111	2.18e-05	4.43484	2.41924	1.29913	CLK3	CDC like kinase 3
ILMN_1718946	0.00115	2.26e-05	4.4251	2.38324	1.42952	ADAM10	ADAM metallopeptidase domain 10
ILMN_1707088	0.00116	2.29e-05	4.42352	2.37191	1.4722	DENND2D	DENN domain containing 2D
ILMN_1722292	0.00119	2.36e-05	4.41437	2.3436	1.55531	AVL9	AVL9 cell migration associated
ILMN_1792800	0.00158	3.38e-05	-4.95857	2.3317	-4.78953	LCN6	lipocalin 6
ILMN_1737935	0.00129	2.61e-05	4.42607	2.31503	3.6594	MACF1	microtubule-actin crosslinking factor 1
ILMN_1723684	0.00123	2.44e-05	-4.41092	2.31435	-4.90354	ACKR1	atypical chemokine receptor 1 (Duffy blood group)
ILMN_1748610	0.00128	2.54e-05	-4.39543	2.27381	-1.50881	HEMGN	hemogen
ILMN_1796411	0.00128	2.55e-05	4.39475	2.27131	1.11499	TBCCD1	TBCC domain containing 1
ILMN_1682987	0.00135	2.78e-05	-4.50457	2.26778	-3.82275	PDZRN4	PDZ domain containing ring finger 4
ILMN_1771734	0.00129	2.57e-05	4.39283	2.26425	0.987845	GMPS	guanine monophosphate synthase
ILMN_1659259	0.00129	2.58e-05	4.39188	2.26076	1.09497	PRPF6	pre-mRNA processing factor 6
ILMN_1753502	0.00131	2.66e-05	-4.43099	2.25875	-3.25235	IGSF11	immunoglobulin superfamily member 11
ILMN_1673991	0.00129	2.59e-05	4.39087	2.25705	0.881306	ATIC	5-aminoimidazole-4-carboxamide ribonucleotide formyltransferase/IMP cyclohydrolase
ILMN_1780081	0.00133	2.73e-05	4.38607	2.25634	2.32067
ILMN_1721292	0.00129	2.59e-05	-4.39018	2.25452	-1.97379	CNRIP1	cannabinoid receptor interacting protein 1
ILMN_1712673	0.0013	2.62e-05	-4.38777	2.24564	-1.63783	SASH1	SAM and SH3 domain containing 1
ILMN_1741007	0.0013	2.63e-05	-4.38984	2.24252	-1.99703	SGCA	sarcoglycan alpha
ILMN_1763852	0.0013	2.63e-05	-4.38658	2.24128	-2.24341	ACACB	acetyl-CoA carboxylase beta
ILMN_1652143	0.0013	2.63e-05	4.38643	2.24073	1.23439	E2F3	E2F transcription factor 3
ILMN_1664516	0.00143	2.99e-05	4.36419	2.21635	3.8689	CENPF	centromere protein F
ILMN_1706519	0.00133	2.71e-05	4.37946	2.21513	3.88274	LAMC2	laminin subunit gamma 2
ILMN_1664706	0.00146	3.08e-05	4.36476	2.19445	3.46876	HIST2H3D	histone cluster 2, H3d
ILMN_1723564	0.00135	2.78e-05	4.37261	2.19002	2.23021	CLDN7	claudin 7
ILMN_1660021	0.00135	2.78e-05	4.37248	2.18952	1.03649	PLIN3	perilipin 3
ILMN_1748271	0.00136	2.81e-05	4.36982	2.17979	1.12617	ATF2	activating transcription factor 2
ILMN_1679880	0.00137	2.83e-05	4.3698	2.17451	1.32511	THOC6	THO complex 6
ILMN_1768751	0.00137	2.85e-05	4.36624	2.16668	1.09945	MTA3	metastasis associated 1 family member 3
ILMN_1663313	0.00138	2.86e-05	4.36521	2.1629	1.13969	AMY1C	amylase, alpha 1C (salivary)
ILMN_1662097	0.00146	3.08e-05	4.36692	2.15118	2.76834	SLC25A43	solute carrier family 25 member 43
ILMN_1679476	0.00139	2.9e-05	4.362	2.15114	0.90901	GART	phosphoribosylglycinamide formyltransferase, phosphoribosylglycinamide synthetase, phosphoribosylaminoimidazole synthetase
ILMN_1681245	0.00147	3.1e-05	4.34775	2.13389	2.48548	ST14	suppression of tumorigenicity 14
ILMN_1671106	0.00144	3.01e-05	-4.35181	2.11389	-2.00182	GJA4	gap junction protein alpha 4
ILMN_1801928	0.00147	3.09e-05	4.34531	2.09016	1.16364	YWHAZ	tyrosine 3-monooxygenase/tryptophan 5-monooxygenase activation protein zeta
ILMN_1810051	0.00147	3.11e-05	-4.347	2.08601	-1.5304	EPB41L4B	erythrocyte membrane protein band 4.1 like 4B
ILMN_1667434	0.00149	3.16e-05	-4.34492	2.07317	-2.82082	ITM2A	integral membrane protein 2A
ILMN_1653125	0.00152	3.24e-05	-4.3366	2.04817	-2.25562	PER1	period circadian clock 1
ILMN_1805477	0.00156	3.33e-05	-4.32615	2.02032	-1.60308	SH2D3C	SH2 domain containing 3C
ILMN_1753449	0.00176	3.84e-05	4.31736	1.99494	6.24526	CST1	cystatin SN
ILMN_1704702	0.00191	4.27e-05	4.38916	1.9795	5.09384	MCM7	minichromosome maintenance complex component 7
ILMN_1790859	0.00167	3.57e-05	-4.30985	1.95618	-2.78225	PLAC9	placenta specific 9
ILMN_1736816	0.00167	3.58e-05	4.3093	1.95418	1.89188	SKA3	spindle and kinetochore associated complex subunit 3
ILMN_1779448	0.0017	3.65e-05	-4.30253	1.93458	-2.34439	EFHD1	EF-hand domain family member D1
ILMN_1757896	0.00202	4.59e-05	4.43275	1.93451	5.2951	ARSH	arylsulfatase family member H
ILMN_1699651	0.00171	3.69e-05	-4.31179	1.93174	-4.56642	IL6	interleukin 6
ILMN_1745806	0.0017	3.67e-05	-4.30121	1.92976	-1.82416	PEMT	phosphatidylethanolamine N-methyltransferase
ILMN_1653163	0.00187	4.17e-05	4.29563	1.91876	2.83773	ZSCAN2	zinc finger and SCAN domain containing 2
ILMN_1723486	0.00174	3.76e-05	4.29664	1.90834	3.25021	HK2	hexokinase 2
ILMN_1812580	0.00176	3.83e-05	4.30202	1.89661	2.30265	YDJC	YdjC homolog (bacterial)
ILMN_1779071	0.00176	3.81e-05	-4.29127	1.89379	-1.79064	FEZ1	fasciculation and elongation protein zeta 1
ILMN_1696330	0.00176	3.83e-05	4.28971	1.88815	1.09426	GUF1	GUF1 homolog, GTPase
ILMN_1740772	0.00176	3.85e-05	-4.28838	1.88334	-1.39494	APBB3	amyloid beta precursor protein binding family B member 3
ILMN_1790692	0.00178	3.91e-05	4.29152	1.87479	3.21048	GNLY	granulysin
ILMN_1774828	0.00179	3.94e-05	4.28281	1.86323	1.14645	VEZT	vezatin, adherens junctions transmembrane protein
ILMN_1813703	0.00184	4.07e-05	4.30432	1.85148	2.03445
ILMN_1792860	0.00184	4.05e-05	4.27555	1.83701	1.10125	MED22	mediator complex subunit 22
ILMN_1723232	0.00194	4.35e-05	4.27997	1.82953	2.2058
ILMN_1804444	0.00206	4.69e-05	-4.44879	1.82679	-5.26643	PDIA2	protein disulfide isomerase family A member 2
ILMN_1795470	0.00186	4.11e-05	4.27151	1.82243	1.66133	MTFP1	mitochondrial fission process 1
ILMN_1783815	0.00186	4.12e-05	4.27275	1.82214	0.947731	COG7	component of oligomeric golgi complex 7
ILMN_1669898	0.00186	4.13e-05	-4.27047	1.81869	-1.44896	EGFL7	EGF like domain multiple 7
ILMN_1677038	0.00186	4.14e-05	-4.27004	1.81713	-2.44212	CPED1	cadherin like and PC-esterase domain containing 1
ILMN_1787906	0.0019	4.25e-05	-4.26454	1.79256	-1.43086	ARHGEF10	Rho guanine nucleotide exchange factor 10
ILMN_1719165	0.00192	4.31e-05	4.25913	1.77783	0.992331	BRMS1	breast cancer metastasis suppressor 1
ILMN_1801366	0.00216	5.02e-05	4.29929	1.77461	3.24253	DNASE1L2	deoxyribonuclease 1 like 2
ILMN_1736428	0.00202	4.58e-05	-4.29435	1.75366	-3.54989	MAL	mal, T-cell differentiation protein
ILMN_1726666	0.00199	4.49e-05	-4.2486	1.73997	-2.67764	GPX3	glutathione peroxidase 3
ILMN_1670353	0.00199	4.5e-05	4.24791	1.7375	2.35042	RAD51AP1	RAD51 associated protein 1
ILMN_1795949	0.00204	4.64e-05	4.24021	1.70988	1.16336	CORO7	coronin 7
ILMN_1740752	0.00206	4.68e-05	4.2376	1.7005	1.72203	GPAT4	glycerol-3-phosphate acyltransferase 4
ILMN_1782403	0.00206	4.71e-05	4.23631	1.69586	2.01901	PRR11	proline rich 11
ILMN_1669390	0.00206	4.72e-05	4.23591	1.69443	1.92974	PPP1R13L	protein phosphatase 1 regulatory subunit 13 like
ILMN_1665945	0.00206	4.73e-05	4.23509	1.6915	0.966289	ACBD3	acyl-CoA binding domain containing 3
ILMN_1679391	0.00214	4.91e-05	-4.22515	1.65589	-2.75358	MAMDC2	MAM domain containing 2
ILMN_1782129	0.00214	4.93e-05	4.22445	1.65342	1.09916	ZBED4	zinc finger BED-type containing 4
ILMN_1663122	0.00214	4.95e-05	4.22657	1.65177	2.11507	PKM	pyruvate kinase, muscle
ILMN_1801098	0.00216	5e-05	-4.22035	1.63876	-1.64324	TSLP	thymic stromal lymphopoietin
ILMN_1756939	0.00252	6.22e-05	-4.42678	1.63315	-2.56791	SMCO3	single-pass membrane protein with coiled-coil domains 3
ILMN_1753584	0.00217	5.04e-05	4.21841	1.63179	1.71153	KRT8	keratin 8
ILMN_1781314	0.00258	6.45e-05	4.30739	1.61915	3.69227	TGS1	trimethylguanosine synthase 1
ILMN_1715742	0.0022	5.13e-05	-4.21679	1.61689	-4.6986	SLC22A1	solute carrier family 22 member 1
ILMN_1787709	0.00221	5.16e-05	4.21372	1.61054	1.55237	DNASE1L1	deoxyribonuclease 1 like 1
ILMN_1808071	0.0023	5.44e-05	4.20021	1.61021	1.93445	KIF14	kinesin family member 14
ILMN_1789240	0.00226	5.29e-05	4.20562	1.58616	1.00631	MLST8	MTOR associated protein, LST8 homolog
ILMN_1815238	0.00228	5.34e-05	4.20947	1.58147	2.37788	MAP2K3	mitogen-activated protein kinase kinase 3
ILMN_1727524	0.00228	5.34e-05	4.20344	1.57839	1.65678	ADAM9	ADAM metallopeptidase domain 9
ILMN_1690105	0.00228	5.37e-05	4.20166	1.57205	1.91862	STAT1	signal transducer and activator of transcription 1
ILMN_1659158	0.00238	5.73e-05	4.20488	1.57171	2.81051	SAMD3	sterile alpha motif domain containing 3
ILMN_1663605	0.00228	5.38e-05	-4.20115	1.57022	-1.1611	RNF123	ring finger protein 123
ILMN_1663390	0.00231	5.47e-05	4.19708	1.55574	2.53533	CDC20	cell division cycle 20
ILMN_1772351	0.00234	5.57e-05	-4.20187	1.54489	-2.94816
ILMN_1810058	0.00234	5.55e-05	4.19325	1.54207	1.39054	RABL2B	RAB, member of RAS oncogene family-like 2B
ILMN_1683939	0.00244	5.95e-05	-4.26998	1.5378	-3.09601	VIPR2	vasoactive intestinal peptide receptor 2
ILMN_1656382	0.00234	5.58e-05	4.19323	1.5376	1.37576	SLX1B	SLX1 homolog B, structure-specific endonuclease subunit
ILMN_1755024	0.00234	5.58e-05	4.19179	1.5369	1.52301	IKBKE	inhibitor of kappa light polypeptide gene enhancer in B-cells, kinase epsilon
ILMN_1795426	0.00234	5.59e-05	4.1912	1.5348	1.31145	STXBP2	syntaxin binding protein 2
ILMN_1795298	0.00235	5.63e-05	-4.19103	1.52977	-2.90629	GPER1	G protein-coupled estrogen receptor 1
ILMN_1779663	0.00236	5.66e-05	4.18802	1.52349	1.19579	TRMT2B	tRNA methyltransferase 2 homolog B
ILMN_1796801	0.00237	5.69e-05	-4.18671	1.51884	-3.56961	ABCA8	ATP binding cassette subfamily A member 8
ILMN_1688886	0.00243	5.9e-05	-4.21849	1.51177	-2.94146	GPC5	glypican 5
ILMN_1798021	0.00238	5.75e-05	4.18385	1.50868	2.33884	BICDL1	BICD family like cargo adaptor 1
ILMN_1735502	0.00268	6.88e-05	-4.40568	1.5077	-3.5937	FAM181B	family with sequence similarity 181 member B
ILMN_1784863	0.0024	5.82e-05	-4.1809	1.4982	-2.57137	CD36	CD36 molecule
ILMN_1734205	0.00244	5.93e-05	-4.17593	1.48054	-1.39229	RASSF1	Ras association domain family member 1
ILMN_1778523	0.00244	5.95e-05	-4.17497	1.47712	-1.82984	KLF9	Kruppel like factor 9
ILMN_1733531	0.00257	6.36e-05	4.17517	1.47352	2.39545	ACTL10	actin like 10
ILMN_1725314	0.00258	6.41e-05	4.17343	1.46747	2.62562	GBP3	guanylate binding protein 3
ILMN_1656361	0.00266	6.76e-05	4.15725	1.46658	3.29007	ARHGAP27	Rho GTPase activating protein 27
ILMN_1741483	0.00247	6.02e-05	4.17169	1.46552	1.92079	HPS1	HPS1, biogenesis of lysosomal organelles complex 3 subunit 1
ILMN_1654812	0.00247	6.04e-05	4.17243	1.4638	2.32581	UNC93B1	unc-93 homolog B1 (C. elegans)
ILMN_1745904	0.00247	6.06e-05	4.17004	1.45966	1.09245	CCDC6	coiled-coil domain containing 6
ILMN_1664912	0.00249	6.11e-05	-4.16789	1.45203	-1.58868
ILMN_1772719	0.00251	6.16e-05	4.16554	1.44373	0.871505	GPN1	GPN-loop GTPase 1
ILMN_1755022	0.00269	6.94e-05	4.1452	1.43985	2.43806	ARHGEF35	Rho guanine nucleotide exchange factor 35
ILMN_1815184	0.00253	6.24e-05	4.16524	1.43399	3.13992	ASPM	abnormal spindle microtubule assembly
ILMN_1703743	0.00257	6.36e-05	4.15716	1.41406	0.80562	AATF	apoptosis antagonizing transcription factor
ILMN_1666305	0.00258	6.44e-05	4.15712	1.40531	2.49581	CDKN3	cyclin dependent kinase inhibitor 3
ILMN_1757129	0.00258	6.46e-05	-4.16077	1.40469	-1.79938	TMEM88	transmembrane protein 88
ILMN_1719811	0.00258	6.46e-05	-4.15468	1.40104	-2.56841	REM1	RRAD and GEM like GTPase 1
ILMN_1750624	0.00264	6.65e-05	-4.16343	1.38478	-1.63233	RXRG	retinoid X receptor gamma
ILMN_1653443	0.00264	6.62e-05	4.14965	1.37897	1.93708	CDK2	cyclin dependent kinase 2
ILMN_1654324	0.00264	6.62e-05	-4.14657	1.37666	-1.76459	HEYL	hes related family bHLH transcription factor with YRPW motif-like
ILMN_1773342	0.00266	6.7e-05	4.14358	1.36609	1.39793	MYO1E	myosin IE
ILMN_1672797	0.00266	6.74e-05	-4.14334	1.36102	-1.65281	BCL6B	B-cell CLL/lymphoma 6B
ILMN_1730553	0.00266	6.74e-05	-4.14208	1.3608	-2.16639	DDR2	discoidin domain receptor tyrosine kinase 2
ILMN_1684217	0.00266	6.76e-05	4.14114	1.35749	2.23564	AURKB	aurora kinase B
ILMN_1755318	0.00266	6.79e-05	4.14296	1.3554	1.6173	HIST1H2AJ	histone cluster 1, H2aj
ILMN_1717636	0.00266	6.79e-05	-4.14293	1.35532	-2.64668	RGMA	repulsive guidance molecule family member a
ILMN_1732850	0.00269	6.92e-05	-4.16039	1.35293	-2.91474	COL21A1	collagen type XXI alpha 1 chain
ILMN_1689828	0.00267	6.81e-05	-4.14049	1.351	-1.32984	DMPK	dystrophia myotonica protein kinase
ILMN_1656042	0.00267	6.83e-05	4.14154	1.35043	1.53339	KIAA0319L	KIAA0319 like
ILMN_1680955	0.00268	6.89e-05	4.13623	1.34019	1.99164	AURKA	aurora kinase A
ILMN_1685928	0.00269	6.93e-05	4.13463	1.33456	1.45575	WDR34	WD repeat domain 34
ILMN_1732981	0.0027	6.98e-05	4.14008	1.33206	2.73837	ZBTB32	zinc finger and BTB domain containing 32
ILMN_1812902	0.00277	7.18e-05	-4.12669	1.30245	-1.75819	CYYR1	cysteine and tyrosine rich 1
ILMN_1754827	0.00284	7.39e-05	4.12513	1.27975	2.40983
ILMN_1810000	0.00284	7.39e-05	-4.11886	1.27496	-5.27887	RDH16	retinol dehydrogenase 16 (all-trans)
ILMN_1797391	0.00286	7.46e-05	-4.11925	1.2679	-4.15427	SLC22A7	solute carrier family 22 member 7
ILMN_1811410	0.0029	7.59e-05	-4.13721	1.26727	-2.45532	RHAG	Rh-associated glycoprotein
ILMN_1752502	0.00286	7.45e-05	4.11528	1.26652	2.70605	HKDC1	hexokinase domain containing 1
ILMN_1761778	0.00287	7.51e-05	4.11468	1.26032	2.10161	TNFSF8	tumor necrosis factor superfamily member 8
ILMN_1703049	0.00292	7.68e-05	-4.13218	1.25537	-2.47164	AKAP7	A-kinase anchoring protein 7
ILMN_1724898	0.00292	7.67e-05	4.10896	1.24027	2.15354	NFE2L3	nuclear factor, erythroid 2 like 3
ILMN_1748923	0.00298	7.85e-05	4.10144	1.21799	1.47973	SMC2	structural maintenance of chromosomes 2
ILMN_1739645	0.003	7.92e-05	4.09896	1.20932	2.33929	ANLN	anillin actin binding protein
ILMN_1803870	0.00355	9.82e-05	4.12803	1.20791	3.64555	CDK16	cyclin dependent kinase 16
ILMN_1733746	0.00301	7.96e-05	-4.09775	1.20505	-1.91662	REEP1	receptor accessory protein 1
ILMN_1793201	0.00302	8e-05	4.09932	1.20242	3.25955	HAGHL	hydroxyacylglutathione hydrolase-like
ILMN_1652445	0.00304	8.06e-05	4.09429	1.19295	1.91341	RAC1	ras-related C3 botulinum toxin substrate 1 (rho family, small GTP binding protein Rac1)
ILMN_1703370	0.00304	8.08e-05	4.09511	1.19182	1.20799	ZDHHC12	zinc finger DHHC-type containing 12
ILMN_1795582	0.00307	8.18e-05	-4.0905	1.17971	-2.27373	CHRD	chordin
ILMN_1670517	0.00307	8.19e-05	4.09161	1.1796	1.2495
ILMN_1659316	0.00332	9.1e-05	-4.20609	1.17504	-5.08185	HEPN1	hepatocellular carcinoma, down-regulated 1
ILMN_1764557	0.00308	8.24e-05	-4.08987	1.17353	-3.17139	FITM1	fat storage inducing transmembrane protein 1
ILMN_1715603	0.00311	8.34e-05	4.09255	1.16618	1.93829	IL23A	interleukin 23 subunit alpha
ILMN_1815154	0.0031	8.31e-05	-4.0862	1.16468	-1.72899	MYH10	myosin, heavy chain 10, non-muscle
ILMN_1651599	0.00329	9e-05	4.19899	1.16099	7.00506	ENTPD2	ectonucleoside triphosphate diphosphohydrolase 2
ILMN_1738819	0.00311	8.35e-05	4.08491	1.16019	0.889589	EFTUD2	elongation factor Tu GTP binding domain containing 2
ILMN_1747067	0.00358	9.94e-05	4.04993	1.16	4.35725	NPAS1	neuronal PAS domain protein 1
ILMN_1655261	0.00319	8.58e-05	-4.07896	1.13547	-4.00138	ERP27	endoplasmic reticulum protein 27
ILMN_1789018	0.0032	8.64e-05	4.07587	1.12864	1.2632	ILF3	interleukin enhancer binding factor 3
ILMN_1652017	0.00324	8.8e-05	4.08128	1.11836	2.08087	PPEF1	protein phosphatase with EF-hand domain 1
ILMN_1656452	0.0037	0.000105	4.04748	1.11829	3.36731	C16orf59	chromosome 16 open reading frame 59
ILMN_1785618	0.00324	8.79e-05	-4.07136	1.11292	-1.40345	SMTN	smoothelin
ILMN_1673673	0.00358	9.92e-05	4.05377	1.11282	4.33724	PBK	PDZ binding kinase
ILMN_1665832	0.00324	8.79e-05	-4.07131	1.11277	-2.58323	ID1	inhibitor of DNA binding 1, HLH protein
ILMN_1656822	0.00324	8.8e-05	4.07241	1.11267	1.26443	DNM2	dynamin 2
ILMN_1718968	0.00329	8.99e-05	-4.08754	1.10694	-3.75519	MT1E	metallothionein 1E
ILMN_1726181	0.00327	8.9e-05	4.06777	1.10045	0.913326	C19orf52	chromosome 19 open reading frame 52
ILMN_1786036	0.00329	9e-05	4.06475	1.08994	1.30992	GPATCH2	G-patch domain containing 2
ILMN_1813104	0.00334	9.18e-05	-4.07155	1.08032	-2.43833	GALNT15	polypeptide N-acetylgalactosaminyltransferase 15
ILMN_1742230	0.00332	9.1e-05	4.06198	1.08029	1.04279	BAZ1A	bromodomain adjacent to zinc finger domain 1A
ILMN_1808391	0.00396	0.000115	4.05277	1.07278	6.55919	DUSP4	dual specificity phosphatase 4
ILMN_1779517	0.00336	9.26e-05	4.05866	1.06487	2.53944	RASEF	RAS and EF-hand domain containing
ILMN_1654118	0.00338	9.31e-05	4.05579	1.05877	1.2585	BCL2L1	BCL2 like 1
ILMN_1700541	0.00341	9.42e-05	-4.05274	1.04818	-3.22307	FBLN1	fibulin 1
ILMN_1753457	0.00403	0.000118	4.0341	1.04657	7.013	PKP3	plakophilin 3
ILMN_1689525	0.00389	0.000113	4.0226	0.998353	3.58011	PMAIP1	phorbol-12-myristate-13-acetate-induced protein 1
ILMN_1777584	0.00358	9.95e-05	4.03783	0.996489	0.695632	KARS	lysyl-tRNA synthetase
ILMN_1739810	0.0036	0.0001	4.03583	0.989576	1.4221	RAI1	retinoic acid induced 1
ILMN_1735930	0.0036	0.0001	-4.03569	0.989082	-1.57917	KLF2	Kruppel like factor 2
ILMN_1680110	0.00362	0.000101	-4.0333	0.980814	-3.03871	ADIRF	adipogenesis regulatory factor
ILMN_1779356	0.00365	0.000102	4.03658	0.976683	2.04718	TP53	tumor protein p53
ILMN_1733774	0.00467	0.000148	4.32185	0.972219	3.35487	2010-03-01	membrane associated ring-CH-type finger 10
ILMN_1721758	0.00366	0.000103	-4.03009	0.965977	-2.27262	ID4	inhibitor of DNA binding 4, HLH protein
ILMN_1745994	0.00366	0.000103	-4.02889	0.965579	-2.16494	GAS7	growth arrest specific 7
ILMN_1791728	0.00367	0.000103	-4.02807	0.96275	-1.83989
ILMN_1752547	0.00367	0.000104	-4.03004	0.961984	-2.93704	MEDAG	mesenteric estrogen dependent adipogenesis
ILMN_1724598	0.00367	0.000104	4.02725	0.959926	1.16357	RABL2A	RAB, member of RAS oncogene family-like 2A
ILMN_1669268	0.00369	0.000104	4.02526	0.953052	1.41479	MEX3D	mex-3 RNA binding family member D
ILMN_1716869	0.00375	0.000107	-4.03656	0.942214	-3.34901	GPM6A	glycoprotein M6A
ILMN_1810628	0.00375	0.000107	-4.02313	0.934324	-2.73449	PRUNE2	prune homolog 2
ILMN_1789839	0.00375	0.000107	4.01866	0.930265	1.05327	GTF3C1	general transcription factor IIIC subunit 1
ILMN_1723793	0.00375	0.000107	4.01825	0.928832	0.848832	PALB2	partner and localizer of BRCA2
ILMN_1793474	0.00375	0.000107	-4.01799	0.927933	-2.29958	INSIG1	insulin induced gene 1
ILMN_1795166	0.0038	0.000109	-4.01366	0.913033	-2.49073	PTH1R	parathyroid hormone 1 receptor
ILMN_1807232	0.00382	0.000109	4.01225	0.908166	1.96326	STIL	SCL/TAL1 interrupting locus
ILMN_1663816	0.004	0.000117	4.01271	0.906866	3.70034	CCDC148	coiled-coil domain containing 148
ILMN_1675391	0.00406	0.000119	-4.02308	0.901432	-3.28393	SLC24A4	solute carrier family 24 member 4
ILMN_1682795	0.00387	0.000112	-4.02142	0.899586	-2.3613	USP29	ubiquitin specific peptidase 29
ILMN_1685551	0.00386	0.000111	4.0091	0.897322	0.861295	CHD4	chromodomain helicase DNA binding protein 4
ILMN_1693830	0.00386	0.000111	4.00847	0.895142	1.1991	LACTB	lactamase beta
ILMN_1768273	0.00387	0.000111	4.00744	0.891608	1.38923	POP1	POP1 homolog, ribonuclease P/MRP subunit
ILMN_1753823	0.00396	0.000115	-4.03664	0.886172	-3.31488	IL17D	interleukin 17D
ILMN_1676088	0.00388	0.000112	-4.00546	0.884769	-2.16763	MSRB3	methionine sulfoxide reductase B3
ILMN_1757270	0.00456	0.000143	3.99447	0.882774	5.00346	DBN1	drebrin 1
ILMN_1685275	0.00395	0.000115	-4.00746	0.868693	-2.70006	MCAM	melanoma cell adhesion molecule
ILMN_1768743	0.00393	0.000114	4.00062	0.868144	0.808906	FIP1L1	factor interacting with PAPOLA and CPSF1
ILMN_1806607	0.00449	0.000139	3.96038	0.857865	4.87221	SFN	stratifin
ILMN_1774983	0.00389	0.000113	5.81745	0.856792	10.4068	IL17A	interleukin 17A
ILMN_1728471	0.00398	0.000116	3.99595	0.852084	0.900277	ARFGEF1	ADP ribosylation factor guanine nucleotide exchange factor 1
ILMN_1690939	0.004	0.000117	3.99361	0.844041	1.75702	TYMP	thymidine phosphorylase
ILMN_1709483	0.00425	0.000127	3.97829	0.828303	1.95694	MRE11A	MRE11 homolog A, double strand break repair nuclease
ILMN_1681983	0.00406	0.00012	-3.99189	0.827131	-2.79295	RSPO3	R-spondin 3
ILMN_1664607	0.00411	0.000121	-3.98841	0.815211	-2.15888	NRIP2	nuclear receptor interacting protein 2
ILMN_1744455	0.00494	0.00016	4.04239	0.81445	4.76237	NOTUM	NOTUM, palmitoleoyl-protein carboxylesterase
ILMN_1703593	0.00412	0.000122	3.98313	0.808084	2.07454	BAIAP2L1	BAI1 associated protein 2 like 1
ILMN_1690839	0.00417	0.000123	-3.9852	0.800471	-2.43316	PLPP7	phospholipid phosphatase 7 (inactive)
ILMN_1678669	0.00449	0.000139	3.95125	0.796112	2.82045	RRM2	ribonucleotide reductase regulatory subunit M2
ILMN_1781942	0.0045	0.00014	3.95554	0.795144	3.57073	HMMR	hyaluronan mediated motility receptor
ILMN_1768662	0.0042	0.000125	3.9769	0.786757	1.06643	UCK2	uridine-cytidine kinase 2
ILMN_1790472	0.0042	0.000125	-3.97671	0.786109	-0.926469	SLC25A28	solute carrier family 25 member 28
ILMN_1661516	0.00446	0.000137	3.97514	0.766726	3.37823
ILMN_1729216	0.00432	0.000129	-3.96828	0.757268	-2.81782	CRYAB	crystallin alpha B
ILMN_1665219	0.00432	0.000129	-3.96748	0.754533	-1.68278	LTBP4	latent transforming growth factor beta binding protein 4
ILMN_1809364	0.00434	0.00013	-3.97028	0.753333	-2.5772	NTF3	neurotrophin 3
ILMN_1736704	0.00434	0.00013	-3.96594	0.749279	-1.63191	DIXDC1	DIX domain containing 1
ILMN_1739847	0.00439	0.000132	3.96193	0.735587	0.959631	EIF3D	eukaryotic translation initiation factor 3 subunit D
ILMN_1788895	0.00443	0.000133	-3.97433	0.73547	-3.74827	SRD5A2	steroid 5 alpha-reductase 2
ILMN_1742779	0.0045	0.00014	3.9477	0.732105	2.61361	CENPL	centromere protein L
ILMN_1747303	0.0044	0.000132	3.96076	0.731593	1.03543	DDX39A	DEAD-box helicase 39A
ILMN_1808078	0.00444	0.000136	-3.98308	0.72813	-4.18407	ADGRG7	adhesion G protein-coupled receptor G7
ILMN_1684585	0.00442	0.000133	-3.95912	0.726002	-2.78715	ACSL1	acyl-CoA synthetase long-chain family member 1
ILMN_1679984	0.00444	0.000135	3.96418	0.721319	1.51739	ZCCHC12	zinc finger CCHC-type containing 12
ILMN_1814173	0.00443	0.000134	3.95728	0.719726	0.89829	SMARCA4	SWI/SNF related, matrix associated, actin dependent regulator of chromatin, subfamily a, member 4
ILMN_1757036	0.00443	0.000134	-3.95723	0.719562	-3.36276	AQP12A	aquaporin 12A
ILMN_1690136	0.00443	0.000134	3.95684	0.718206	1.02156	NIPBL	NIPBL, cohesin loading factor
ILMN_1731538	0.00444	0.000135	-3.95556	0.713872	-1.68124	ZEB2	zinc finger E-box binding homeobox 2
ILMN_1658695	0.00445	0.000136	3.96339	0.710818	2.85898	NUF2	NUF2, NDC80 kinetochore complex component
ILMN_1699599	0.00444	0.000135	3.95562	0.71058	1.56322	FCRL3	Fc receptor like 3
ILMN_1659047	0.00444	0.000135	3.95455	0.710401	1.95762	HIST2H2AA3	histone cluster 2, H2aa3
ILMN_1753196	0.00444	0.000136	3.95402	0.708591	2.10981	PTTG1	pituitary tumor-transforming 1
ILMN_1761486	0.00444	0.000136	3.9537	0.70753	1.62026	BORA	bora, aurora kinase A activator
ILMN_1734827	0.00446	0.000137	3.95379	0.70081	1.72754	MKI67	marker of proliferation Ki-67
ILMN_1811114	0.00446	0.000137	-3.95076	0.69751	-3.6269	SDS	serine dehydratase
ILMN_1707890	0.00446	0.000138	3.95129	0.695833	1.19846	TMEM41A	transmembrane protein 41A
ILMN_1654966	0.0045	0.00014	-3.9576	0.68726	-2.73102	SCARA3	scavenger receptor class A member 3
ILMN_1712916	0.00457	0.000143	-3.9756	0.68258	-2.29094	LOC90768	uncharacterized LOC90768
ILMN_1692168	0.0045	0.00014	3.94569	0.680221	1.13324	UBE2Z	ubiquitin conjugating enzyme E2 Z
ILMN_1751576	0.00451	0.000141	-3.94352	0.672862	-1.8174	TEK	TEK receptor tyrosine kinase
ILMN_1753143	0.00451	0.000141	3.94343	0.672562	1.56179	RHPN2	rhophilin Rho GTPase binding protein 2
ILMN_1803563	0.00451	0.000141	-3.94325	0.671949	-0.814491
ILMN_1660144	0.00456	0.000143	3.94096	0.66072	1.15152	TCF20	transcription factor 20
ILMN_1682037	0.00477	0.000153	3.9251	0.652319	2.49214	FBXL8	F-box and leucine rich repeat protein 8
ILMN_1676254	0.00463	0.000146	3.93822	0.644434	2.30455	MTMR3	myotubularin related protein 3
ILMN_1662419	0.00463	0.000146	-3.93461	0.64256	-1.85918	COX7A1	cytochrome c oxidase subunit 7A1
ILMN_1674411	0.00468	0.000148	3.9341	0.630475	2.61676	CKAP2	cytoskeleton associated protein 2
ILMN_1768973	0.00467	0.000147	3.93101	0.630359	1.83414	HIST2H2AC	histone cluster 2, H2ac
ILMN_1767176	0.00518	0.000172	5.18664	0.627446	5.56643	PDE9A	phosphodiesterase 9A
ILMN_1690035	0.00477	0.000153	-3.94503	0.615233	-2.24878	FLYWCH1	FLYWCH-type zinc finger 1
ILMN_1712199	0.00473	0.00015	3.92629	0.614353	1.35857	C12orf49	chromosome 12 open reading frame 49
ILMN_1725992	0.00473	0.00015	3.92628	0.614322	0.975794	RAPGEF6	Rap guanine nucleotide exchange factor 6
ILMN_1753923	0.00477	0.000152	-3.92345	0.604703	-1.77602	MYC	v-myc avian myelocytomatosis viral oncogene homolog
ILMN_1806502	0.00477	0.000152	3.92538	0.604481	2.0038	ZNF165	zinc finger protein 165
ILMN_1680339	0.00477	0.000152	-3.92392	0.602953	-2.51325	PDGFRL	platelet derived growth factor receptor like
ILMN_1652072	0.00504	0.000165	-4.00369	0.602133	-3.80867	NIM1K	NIM1 serine/threonine protein kinase
ILMN_1700728	0.00477	0.000152	3.92361	0.601894	2.09739	KRTCAP3	keratinocyte associated protein 3
ILMN_1681899	0.00478	0.000153	3.92586	0.599078	1.76009	NSUN5P2	NOP2/Sun RNA methyltransferase family member 5 pseudogene 2
ILMN_1795251	0.00478	0.000153	-3.92005	0.593198	-3.19508	SPARCL1	SPARC like 1
ILMN_1728262	0.00483	0.000156	-3.93449	0.593137	-5.57114	SAA2	serum amyloid A2
ILMN_1802404	0.0048	0.000154	3.92382	0.592196	2.07057
ILMN_1744050	0.00508	0.000166	3.91481	0.583547	2.36822	ASB7	ankyrin repeat and SOCS box containing 7
ILMN_1689110	0.00483	0.000156	3.91627	0.580392	1.02322	NOB1	NIN1/PSMD8 binding protein 1 homolog
ILMN_1728197	0.00485	0.000157	-3.91444	0.574199	-1.87421	CLDN5	claudin 5
ILMN_1738681	0.00489	0.000158	3.91171	0.564973	0.896565	NUP62	nucleoporin 62
ILMN_1724117	0.00491	0.000159	3.91041	0.560589	0.90506	ZNF646	zinc finger protein 646
ILMN_1774387	0.00494	0.00016	-3.90798	0.552369	-1.31867	ZHX3	zinc fingers and homeoboxes 3
ILMN_1781374	0.005	0.000163	3.9041	0.53928	1.72057	TUFT1	tuftelin 1
ILMN_1653856	0.00504	0.000164	3.90168	0.531098	2.44972	UBASH3B	ubiquitin associated and SH3 domain containing B
ILMN_1734010	0.00504	0.000165	3.90225	0.529747	1.24557	CCDC186	coiled-coil domain containing 186
ILMN_1686088	0.00512	0.000169	-3.92078	0.525543	-1.90894	CNTN2	contactin 2
ILMN_1794306	0.00577	0.000201	4.13691	0.524184	7.94718	USP28	ubiquitin specific peptidase 28
ILMN_1658094	0.00529	0.000178	3.89473	0.520994	3.81784	ZNF365	zinc finger protein 365
ILMN_1694556	0.00512	0.000168	3.90017	0.512576	2.72487	ADAP1	ArfGAP with dual PH domains 1
ILMN_1736568	0.00512	0.000168	3.89472	0.507621	0.956669	CASP2	caspase 2
ILMN_1654541	0.00512	0.000169	-3.89423	0.505967	-1.12769	ATP6V1G2	ATPase H+ transporting V1 subunit G2
ILMN_1698766	0.00513	0.000169	3.89336	0.503041	1.51634	PYCARD	PYD and CARD domain containing
ILMN_1713534	0.00523	0.000174	-3.91891	0.500388	-2.55411	LDB3	LIM domain binding 3
ILMN_1752423	0.00514	0.00017	3.89245	0.499972	1.0141	MAP2K2	mitogen-activated protein kinase kinase 2
ILMN_1798360	0.00518	0.000171	-3.88983	0.49116	-1.83851	ACKR3	atypical chemokine receptor 3
ILMN_1743371	0.00527	0.000176	-3.91176	0.48648	-2.52544	ABHD1	abhydrolase domain containing 1
ILMN_1654773	0.00523	0.000173	3.88655	0.480103	1.54274	CASK	calcium/calmodulin dependent serine protein kinase
ILMN_1727642	0.00523	0.000174	3.88622	0.478996	0.940121	MOGS	mannosyl-oligosaccharide glucosidase
ILMN_1742332	0.00523	0.000174	-3.88569	0.477231	-1.6513	KCTD12	potassium channel tetramerization domain containing 12
ILMN_1728556	0.00526	0.000175	3.88332	0.469244	1.29866	SMC4	structural maintenance of chromosomes 4
ILMN_1789954	0.00526	0.000176	-3.884	0.468335	-1.32833	SYT11	synaptotagmin 11
ILMN_1789123	0.00526	0.000176	3.88279	0.467466	1.58175	PLK4	polo like kinase 4
ILMN_1698259	0.00528	0.000177	-3.88713	0.465384	-2.51687	TMEM100	transmembrane protein 100
ILMN_1766222	0.00529	0.000178	3.87955	0.456578	0.951002	LARP4B	La ribonucleoprotein domain family member 4B
ILMN_1697015	0.00541	0.000182	-3.90266	0.456512	-2.16528	KL	klotho
ILMN_1683283	0.00548	0.000186	-3.90626	0.443772	-3.30217
ILMN_1732154	0.00557	0.000191	-3.93008	0.442167	-3.09944	BCAN	brevican
ILMN_1767129	0.00553	0.000189	-3.91045	0.435816	-2.21565	ABCC8	ATP binding cassette subfamily C member 8
ILMN_1724424	0.00542	0.000183	-3.87201	0.431273	-1.99439	PRRT2	proline rich transmembrane protein 2
ILMN_1811258	0.00543	0.000183	3.87123	0.428656	1.41366	RELB	RELB proto-oncogene, NF-kB subunit
ILMN_1693928	0.00551	0.000187	3.89272	0.428378	2.16479	CDH24	cadherin 24
ILMN_1800733	0.00544	0.000184	3.87131	0.425754	0.983047	MANBA	mannosidase beta
ILMN_1763654	0.00645	0.000235	4.57012	0.424972	5.68775	DENND1B	DENN domain containing 1B
ILMN_1727051	0.00546	0.000185	3.87025	0.422202	0.711049	DDX19A	DEAD-box helicase 19A
ILMN_1752793	0.00548	0.000186	-3.86745	0.415962	-0.895749	SAP18	Sin3A associated protein 18
ILMN_1777322	0.0055	0.000187	3.86925	0.412355	1.83614	FAM91A1	family with sequence similarity 91 member A1
ILMN_1747271	0.00555	0.00019	-3.87919	0.409166	-2.15107	ATP1B2	ATPase Na+/K+ transporting subunit beta 2
ILMN_1657139	0.00551	0.000188	3.86463	0.40651	0.899148	ADAT1	adenosine deaminase, tRNA specific 1
ILMN_1654065	0.00551	0.000188	-3.86425	0.405262	-2.57792	ATOH8	atonal bHLH transcription factor 8
ILMN_1651237	0.00604	0.000215	3.83186	0.396803	3.35432	CDT1	chromatin licensing and DNA replication factor 1
ILMN_1651406	0.00557	0.000191	3.8597	0.390016	1.27147	PPP1R14B	protein phosphatase 1 regulatory inhibitor subunit 14B
ILMN_1665455	0.00557	0.000191	-3.85904	0.387808	-1.10865	DCUN1D3	defective in cullin neddylation 1 domain containing 3
ILMN_1775224	0.00557	0.000192	-3.85995	0.387722	-1.75748	NOS3	nitric oxide synthase 3
ILMN_1786215	0.00558	0.000192	3.85919	0.385191	1.52834	ZNF3	zinc finger protein 3
ILMN_1781057	0.00621	0.000224	3.93154	0.375731	2.39141	IFNW1	interferon omega 1
ILMN_1725612	0.00563	0.000194	3.85515	0.374778	1.02196	NUP50	nucleoporin 50
ILMN_1769403	0.00596	0.00021	3.85085	0.368583	2.771	DNAJC5B	DnaJ heat shock protein family (Hsp40) member C5 beta
ILMN_1681437	0.00566	0.000196	-3.85313	0.368031	-2.33595	DCXR	dicarbonyl and L-xylulose reductase
ILMN_1756673	0.00569	0.000197	3.85087	0.360484	0.983581	POC5	POC5 centriolar protein
ILMN_1801905	0.006	0.000212	3.83331	0.349589	2.04594	ATG4D	autophagy related 4D cysteine peptidase
ILMN_1682814	0.00576	0.0002	3.84803	0.347903	2.29078	MARVELD3	MARVEL domain containing 3
ILMN_1796595	0.00576	0.0002	3.84678	0.346826	1.2059	C5orf22	chromosome 5 open reading frame 22
ILMN_1708906	0.00576	0.000201	3.8462	0.344886	0.81469	CNOT11	CCR4-NOT transcription complex subunit 11
ILMN_1707312	0.0058	0.000202	-3.84365	0.336368	-1.52812	NFIL3	nuclear factor, interleukin 3 regulated
ILMN_1677497	0.00584	0.000204	-3.84266	0.330018	-2.22762	STAB2	stabilin 2
ILMN_1658706	0.00584	0.000204	-3.84204	0.327936	-2.81243	ST6GALNAC2	ST6 N-acetylgalactosaminide alpha-2,6-sialyltransferase 2
ILMN_1683133	0.00585	0.000205	-3.84255	0.32651	-1.84028	KLF15	Kruppel like factor 15
ILMN_1754830	0.00591	0.000207	3.83808	0.314739	2.1818	PTPN14	protein tyrosine phosphatase, non-receptor type 14
ILMN_1702065	0.00593	0.000208	3.83709	0.311437	0.99059	MFSD5	major facilitator superfamily domain containing 5
ILMN_1672650	0.00617	0.000222	3.82294	0.308977	2.78496	PKM	pyruvate kinase, muscle
ILMN_1694279	0.00596	0.000209	3.83411	0.304589	1.07129	GLB1L	galactosidase beta 1 like
ILMN_1750465	0.00597	0.000211	3.83388	0.300756	0.978729	AGPS	alkylglycerone phosphate synthase
ILMN_1777683	0.00632	0.000229	3.83757	0.296269	2.46937	ADAMTSL4	ADAMTS like 4
ILMN_1715189	0.006	0.000212	-3.83167	0.293432	-2.41976	LHX6	LIM homeobox 6
ILMN_1740586	0.00602	0.000214	-3.83566	0.290641	-3.99237	PLA2G2A	phospholipase A2 group IIA
ILMN_1699472	0.00602	0.000213	-3.82946	0.289116	-1.50701	ST3GAL3	ST3 beta-galactoside alpha-2,3-sialyltransferase 3
ILMN_1695074	0.00602	0.000214	3.82874	0.28671	1.64324	DIP2A	disco interacting protein 2 homolog A
ILMN_1718766	0.00602	0.000214	-3.82826	0.285128	-2.39526	MT1F	metallothionein 1F
ILMN_1742025	0.00608	0.000217	-3.82443	0.27239	-2.19193	OLFM1	olfactomedin 1
ILMN_1804929	0.00608	0.000217	3.82409	0.271263	2.98563	OXTR	oxytocin receptor
ILMN_1738671	0.00566	0.000196	6.42023	0.270651	10.2301
ILMN_1789196	0.0061	0.000218	-3.82295	0.267464	-1.86761	TPM2	tropomyosin 2 (beta)
ILMN_1802757	0.00746	0.000286	4.2693	0.263716	3.82207	CBWD1	COBW domain containing 1
ILMN_1724863	0.00612	0.000219	3.82169	0.263259	0.83899	TICAM1	toll like receptor adaptor molecule 1
ILMN_1781520	0.00615	0.00022	3.82121	0.258685	1.31816	NAA40	N(alpha)-acetyltransferase 40, NatD catalytic subunit
ILMN_1779428	0.00615	0.000221	-3.82209	0.25854	-1.46734	CCDC184	coiled-coil domain containing 184
ILMN_1652160	0.00616	0.000221	3.81996	0.254525	1.53267	LRBA	LPS responsive beige-like anchor protein
ILMN_1752333	0.0062	0.000223	3.81601	0.244408	0.937352	SLC35E1	solute carrier family 35 member E1
ILMN_1712806	0.0062	0.000224	3.81581	0.243761	1.23324
ILMN_1725680	0.00625	0.000226	3.81422	0.235515	1.86053	LRRC1	leucine rich repeat containing 1
ILMN_1698072	0.00629	0.000228	3.81196	0.228019	1.01571	PITRM1	pitrilysin metallopeptidase 1
ILMN_1724497	0.00635	0.00023	3.80737	0.215764	1.10419
ILMN_1753712	0.0064	0.000233	3.80475	0.207079	0.933618	STX10	syntaxin 10
ILMN_1727965	0.00794	0.000316	3.8946	0.204268	3.74549	ALDH3B1	aldehyde dehydrogenase 3 family member B1
ILMN_1745251	0.00649	0.000236	3.80017	0.191938	2.04143	DTL	denticleless E3 ubiquitin protein ligase homolog
ILMN_1656899	0.00649	0.000237	3.79988	0.190973	0.986001	CIB1	calcium and integrin binding 1
ILMN_1795639	0.00649	0.000237	-3.79946	0.189591	-1.32501	MGMT	O-6-methylguanine-DNA methyltransferase
ILMN_1676066	0.0065	0.000238	-3.79989	0.188087	-1.27366	ASB4	ankyrin repeat and SOCS box containing 4
ILMN_1653200	0.00654	0.000239	-3.79674	0.180595	-1.64614	SLC22A17	solute carrier family 22 member 17
ILMN_1747241	0.00654	0.00024	3.79602	0.17821	0.708288	IWS1	IWS1, SUPT6H interacting protein
ILMN_1741970	0.00654	0.00024	3.79601	0.178177	1.76015	JUP	junction plakoglobin
ILMN_1745807	0.00656	0.000241	3.79457	0.173439	1.1918	TMEM62	transmembrane protein 62
ILMN_1725946	0.00661	0.000244	3.79419	0.16631	1.61096	IRF6	interferon regulatory factor 6
ILMN_1705977	0.0066	0.000243	-3.79238	0.166203	-1.06466	LACRT	lacritin
ILMN_1665792	0.00662	0.000245	3.79079	0.160944	2.10882	ITGA2	integrin subunit alpha 2
ILMN_1782635	0.00665	0.000246	3.78957	0.156927	1.02462	YARS2	tyrosyl-tRNA synthetase 2
ILMN_1758250	0.00665	0.000246	3.789	0.155037	0.906727	TRAFD1	TRAF-type zinc finger domain containing 1
ILMN_1706238	0.00667	0.000247	3.78787	0.15129	0.885283	CSE1L	chromosome segregation 1 like
ILMN_1740291	0.00669	0.000248	3.78755	0.147369	2.18043	POLQ	DNA polymerase theta
ILMN_1729167	0.00681	0.000253	3.78121	0.129352	0.886189	EFL1	elongation factor like GTPase 1
ILMN_1753924	0.00682	0.000254	3.78066	0.127532	3.07651	KRT19	keratin 19
ILMN_1742450	0.00684	0.000255	3.77931	0.123085	1.17099	TAPBP	TAP binding protein (tapasin)
ILMN_1762275	0.00685	0.000255	3.77852	0.120489	1.99366
ILMN_1681829	0.00686	0.000256	3.77775	0.117956	1.41559	ZNF606	zinc finger protein 606
ILMN_1799765	0.00694	0.000259	3.77546	0.107561	1.3745	RAB24	RAB24, member RAS oncogene family
ILMN_1741468	0.00695	0.00026	3.77321	0.103016	2.65014	FAP	fibroblast activation protein alpha
ILMN_1807050	0.00735	0.00028	-3.83514	0.099684	-3.39513	SHC4	SHC adaptor protein 4
ILMN_1659649	0.00713	0.000268	-3.79431	0.099267	-2.19024	SGCG	sarcoglycan gamma
ILMN_1668247	0.00703	0.000264	-3.77549	0.095756	-1.86853	LTC4S	leukotriene C4 synthase
ILMN_1813766	0.00703	0.000264	-3.76976	0.091658	-2.18834	RCL1	RNA terminal phosphate cyclase like 1
ILMN_1750102	0.00743	0.000284	3.7553	0.081609	2.19927	EME1	essential meiotic structure-specific endonuclease 1
ILMN_1789781	0.00714	0.000269	3.76436	0.073929	1.26997	PIM3	Pim-3 proto-oncogene, serine/threonine kinase
ILMN_1759341	0.00714	0.000269	3.76387	0.072325	1.39091	MAN2B1	mannosidase alpha class 2B member 1
ILMN_1807501	0.00746	0.000286	3.74745	0.070926	2.00817	GINS4	GINS complex subunit 4
ILMN_1806030	0.00715	0.00027	3.76402	0.069988	1.45472	PPL	periplakin
ILMN_1716246	0.00715	0.00027	-3.76309	0.069759	-2.40289	FRZB	frizzled-related protein
ILMN_1780863	0.00726	0.000274	3.75835	0.05421	1.22613	PTGFRN	prostaglandin F2 receptor inhibitor
ILMN_1685703	0.00727	0.000275	-3.75733	0.050865	-3.36779	ACOX2	acyl-CoA oxidase 2
ILMN_1809582	0.00761	0.000296	3.74129	0.04226	2.30517	VPS13C	vacuolar protein sorting 13 homolog C
ILMN_1673544	0.00734	0.000278	3.75462	0.041962	1.53482	TCEANC2	transcription elongation factor A N-terminal and central domain containing 2
ILMN_1687284	0.00735	0.00028	3.75312	0.037047	1.52658	USP12	ubiquitin specific peptidase 12
ILMN_1763694	0.00735	0.00028	3.75289	0.036293	0.718128	RSPRY1	ring finger and SPRY domain containing 1
ILMN_1673494	0.0074	0.000282	-3.75061	0.028824	-1.71963	RASIP1	Ras interacting protein 1
ILMN_1761314	0.0074	0.000282	3.75138	0.028567	1.94592	NFS1	NFS1 cysteine desulfurase
ILMN_1782419	0.0074	0.000283	-3.75002	0.026906	-1.51049	GNG11	G protein subunit gamma 11
ILMN_1754531	0.00742	0.000284	3.74901	0.023578	0.763053	AP4E1	adaptor related protein complex 4 epsilon 1 subunit
ILMN_1673357	0.00815	0.000328	3.71833	0.013801	2.65317	SLA2	Src like adaptor 2
ILMN_1652421	0.00748	0.000288	-3.74932	0.013252	-2.53873	ANKRD35	ankyrin repeat domain 35
ILMN_1662166	0.00748	0.000288	3.74594	0.010783	2.94311	PTK7	protein tyrosine kinase 7 (inactive)
ILMN_1693650	0.00748	0.000288	-3.74455	0.009008	-1.56983	FES	FES proto-oncogene, tyrosine kinase
ILMN_1651262	0.0075	0.000289	3.74334	0.005057	0.678486	HNRNPAB	heterogeneous nuclear ribonucleoprotein A/B
ILMN_1720024	0.00753	0.000291	-3.74522	0.002788	-1.53326
ILMN_1769751	0.00753	0.000291	3.74166	-0.000435	1.06025	PIGG	phosphatidylinositol glycan anchor biosynthesis class G
ILMN_1702105	0.00753	0.000292	-3.74314	-0.001148	-1.98534	EFS	embryonal Fyn-associated substrate
ILMN_1652580	0.00753	0.000292	3.74106	-0.002408	1.36242	POLD1	DAN polymerase delta 1, catalytic subunit
ILMN_1661778	0.00758	0.000294	3.74082	-0.008722	2.22343	TESMIN	testis expressed metallothionein like protein
ILMN_1772466	0.0079	0.000313	3.72352	-0.009538	3.10517	SH2D3A	SH2 domain containing 3A
ILMN_1749327	0.00759	0.000295	3.73782	-0.012993	1.88102	MAPK13	mitogen-activated protein kinase 13
ILMN_1665797	0.00759	0.000295	3.73763	-0.01363	0.844335	CSE1L	chromosome segregation 1 like
ILMN_1723685	0.00915	0.00039	3.92182	-0.015098	4.37982	PCDHB10	protocadherin beta 10
ILMN_1762747	0.00765	0.000298	3.7348	-0.022844	2.333	RPL15	ribosomal protein L15
ILMN_1776936	0.00771	0.000303	-3.74681	-0.023423	-3.45274	KANK4	KN motif and ankyrin repeat domains 4
ILMN_1666502	0.00765	0.000298	-3.73458	-0.023582	-1.79708	SOBP	sine oculis binding protein homolog
ILMN_1722554	0.00765	0.000299	-3.73605	-0.024274	-1.5538	DCD	dermcidin
ILMN_1668532	0.00765	0.000299	3.73404	-0.025322	0.98905	GMEB2	glucocorticoid modulatory element binding protein 2
ILMN_1813410	0.00768	0.000301	3.73226	-0.031139	0.993111	RNF220	ring finger protein 220
ILMN_1688100	0.00774	0.000304	-3.73148	-0.039153	-2.7531	ANGPT1	angiopoietin 1
ILMN_1654429	0.00855	0.000353	3.71554	-0.041893	2.76136	PARPBP	PARP1 binding protein
ILMN_1778034	0.00776	0.000305	3.72816	-0.044508	1.84624	ZWINT	ZW10 interacting kinetochore protein
ILMN_1742262	0.00781	0.000308	3.72936	-0.048856	1.38901	CEP131	centrosomal protein 131
ILMN_1748206	0.00782	0.000308	-3.72662	-0.052217	-1.78596	CCM2L	CCM2 like scaffolding protein
ILMN_1766925	0.00786	0.00031	-3.72932	-0.054717	-2.3298	CDH13	cadherin 13
ILMN_1706779	0.00788	0.000311	3.72379	-0.06143	1.41443	LIG1	DNA ligase 1
ILMN_1812262	0.0079	0.000313	3.72095	-0.067984	1.89293	DDR1	discoidin domain receptor tyrosine kinase 1
ILMN_1760884	0.0079	0.000313	3.72086	-0.068282	0.763951	RABGEF1	RAB guanine nucleotide exchange factor 1
ILMN_1651336	0.0079	0.000314	-3.72162	-0.068495	-1.36692	MLYCD	malonyl-CoA decarboxylase
ILMN_1736700	0.00794	0.000316	3.71835	-0.076451	1.82444	ALDOA	aldolase, fructose-bisphosphate A
ILMN_1763347	0.00797	0.000317	3.71713	-0.080424	1.16466	PIK3CB	phosphatidylinositol-4,5-bisphosphate 3-kinase catalytic subunit beta
ILMN_1719286	0.00804	0.000321	3.71412	-0.090213	1.00983	CTSA	cathepsin A
ILMN_1699814	0.00833	0.000339	-3.76039	-0.092724	-3.07625	TLL1	tolloid like 1
ILMN_1687315	0.00807	0.000322	-3.71276	-0.094614	-1.20683	RXRA	retinoid X receptor alpha
ILMN_1803945	0.00809	0.000323	3.71174	-0.097929	1.38232	HCP5	HLA complex P5 (non-protein coding)
ILMN_1770299	0.00812	0.000325	3.71031	-0.102576	1.50087
ILMN_1743836	0.00813	0.000326	-3.70971	-0.104527	-1.6849	MXRA7	matrix remodeling associated 7
ILMN_1679921	0.00857	0.000355	3.71465	-0.104791	3.1615	CT45A3	cancer/testis antigen family 45, member A3
ILMN_1815102	0.00814	0.000327	-3.70997	-0.106322	-2.66739	LCAT	lecithin-cholesterol acyltransferase
ILMN_1654016	0.00815	0.000328	3.70799	-0.110129	0.691417	MYL12B	myosin light chain 12B
ILMN_1797813	0.00818	0.000329	3.70664	-0.114493	0.802755	SUZ12	SUZ12 polycomb repressive complex 2 subunit
ILMN_1808732	0.00829	0.000335	-3.71765	-0.117228	-5.38104	SAA1	serum amyloid A1
ILMN_1771093	0.00899	0.000378	3.67048	-0.120609	1.67047	ZNF414	zinc finger protein 414
ILMN_1810864	0.00824	0.000332	-3.70623	-0.121138	-2.04915	PMP22	peripheral myelin protein 22
ILMN_1726054	0.00839	0.000346	-3.73869	-0.122943	-2.09559	TEX26	testis expressed 26
ILMN_1670033	0.0107	0.000485	3.79774	-0.123634	4.69762	HIST1H4I	histone cluster 1, H4i
ILMN_1654632	0.00837	0.000342	-3.72681	-0.12473	-2.48876	RGS7BP	regulator of G-protein signaling 7 binding protein
ILMN_1713521	0.00827	0.000334	3.70273	-0.127177	1.15689	ZNF205	zinc finger protein 205
ILMN_1755834	0.00829	0.000335	3.70132	-0.131739	1.64076	FEN1	flap structure-specific endonuclease 1
ILMN_1673356	0.00831	0.000337	-3.70151	-0.133751	-1.41049	FAM83C	family with sequence similarity 83 member C
ILMN_1800697	0.00832	0.000337	-3.69976	-0.1368	-1.52116	LDB2	LIM domain binding 2
ILMN_1688154	0.00833	0.00034	3.70204	-0.140162	2.93355	MST1R	macrophage stimulating 1 receptor
ILMN_1783287	0.00833	0.000339	3.69849	-0.140914	3.04346	S100A14	S100 calcium binding protein A14
ILMN_1801504	0.00833	0.00034	3.69881	-0.142483	1.64958	RUNX1	runt related transcription factor 1
ILMN_1658074	0.00943	0.000405	3.7099	-0.142717	2.5899	ZCCHC13	zinc finger CCHC-type containing 13
ILMN_1787186	0.00833	0.00034	-3.69774	-0.143361	-2.83423	NOV	nephroblastoma overexpressed
ILMN_1739582	0.00837	0.000343	3.70206	-0.145744	2.43669	HOXA9	homeobox A9
ILMN_1735199	0.00837	0.000342	3.6956	-0.150294	0.919028	CIAPIN1	cytokine induced apoptosis inhibitor 1
ILMN_1760034	0.00839	0.000344	-3.69418	-0.154862	-1.07415	EPAS1	endothelial PAS domain protein 1
ILMN_1705733	0.00839	0.000344	3.694	-0.155458	1.24488	RPRD2	regulation of nuclear pre-mRNA domain containing 2
ILMN_1809099	0.00839	0.000345	-3.69356	-0.156867	-2.47851	IL33	interleukin 33
ILMN_1767800	0.00839	0.000345	3.69428	-0.157153	1.07684	KDELR1	KDEL endoplasmic reticulum protein retention receptor 1
ILMN_1722438	0.00839	0.000346	3.69282	-0.15929	2.49095	MGAT4B	mannosyl (alpha-1,3-)-glycoprotein beta-1,4-N-acetylglucosaminyltransferase, isozyme B
ILMN_1789243	0.00844	0.000348	3.69192	-0.16478	0.695276	VPS33B	VPS33B, late endosome and lysosome associated
ILMN_1783120	0.0085	0.000351	-3.68841	-0.173529	-0.928836	SLMAP	sarcolemma associated protein
ILMN_1743345	0.00857	0.000355	-3.6895	-0.180593	-1.58727
ILMN_1806818	0.00861	0.000357	3.68335	-0.189871	1.02311	MCM3	minichromosome maintenance complex component 3
ILMN_1813645	0.00899	0.000382	3.66879	-0.190893	2.0681	NEK11	NIMA related kinase 11
ILMN_1812392	0.00863	0.000358	3.68248	-0.192702	0.767061	TMSB10	thymosin beta 10
ILMN_1800611	0.00867	0.000361	3.68396	-0.195715	1.96251	CEP72	centrosomal protein 72
ILMN_1725157	0.00878	0.000367	3.69706	-0.196551	1.93531
ILMN_1811729	0.00868	0.000361	3.68211	-0.19904	1.60959	CBLC	Cbl proto-oncogene C
ILMN_1794046	0.00869	0.000362	3.6793	-0.202947	0.804576	MTX2	metaxin 2
ILMN_1666894	0.00878	0.000366	-3.67626	-0.212755	-1.95043	CSPG4	chondroitin sulfate proteoglycan 4
ILMN_1725366	0.0088	0.000368	-3.67503	-0.216718	-3.57725	SLC27A5	solute carrier family 27 member 5
ILMN_1669070	0.00881	0.000369	3.67518	-0.218769	0.848779	MIPEP	mitochondrial intermediate peptidase
ILMN_1745737	0.00887	0.000372	3.67201	-0.22647	1.01075	DIS3L2	DIS3 like 3'-5' exoribonuclease 2
ILMN_1777564	0.00891	0.000374	3.67147	-0.230712	2.42478	MAD2L1	MAD2 mitotic arrest deficient-like 1 (yeast)
ILMN_1692719	0.00891	0.000374	-3.6699	-0.233262	-1.71034	PTX3	pentraxin 3
ILMN_1693853	0.00899	0.000379	3.6665	-0.244189	1.31349	HHAT	hedgehog acyltransferase
ILMN_1710523	0.00899	0.00038	3.66859	-0.245153	1.41882	ATP8B1	ATPase phospholipid transporting 8B1
ILMN_1763208	0.00899	0.000379	-3.66618	-0.245215	-1.29691	ZNF10	zinc finger protein 10
ILMN_1796589	0.00899	0.000381	3.66695	-0.247795	2.7013	TRIP13	thyroid hormone receptor interactor 13
ILMN_1682919	0.00899	0.00038	3.66534	-0.247918	0.891605	PAFAH2	platelet activating factor acetylhydrolase 2
ILMN_1701441	0.00899	0.000381	-3.66512	-0.248649	-2.28192	LPAR1	lysophosphatidic acid receptor 1
ILMN_1702034	0.00899	0.000382	-3.66444	-0.250834	-1.24364	PEX3	peroxisomal biogenesis factor 3
ILMN_1733164	0.00902	0.000383	3.66633	-0.252379	1.56433
ILMN_1659350	0.00948	0.000408	3.65027	-0.252553	2.11067	CASP6	caspase 6
ILMN_1657435	0.00901	0.000383	-3.66353	-0.253748	-3.99136	MT1M	metallothionein 1M
ILMN_1723198	0.00948	0.000409	3.64881	-0.254542	2.67633	CDKN2B	cyclin dependent kinase inhibitor 2B
ILMN_1810797	0.00903	0.000384	-3.66241	-0.257347	-1.58059	WASF3	WAS protein family member 3
ILMN_1809291	0.00916	0.000391	-3.65981	-0.270721	-3.24254	TSPAN7	tetraspanin 7
ILMN_1687567	0.00916	0.000391	3.6572	-0.274083	1.02116	CUX1	cut like homeobox 1
ILMN_1798804	0.00935	0.0004	3.65104	-0.293843	0.843814	SRPK1	SRSF protein kinase 1
ILMN_1796508	0.00974	0.000428	3.63378	-0.2971	1.90593	TOP1MT	topoisomerase (DNA) I, mitochondrial
ILMN_1714278	0.00937	0.000401	3.65	-0.297187	0.993942	MSANTD3	Myb/SANT DNA binding domain containing 3
ILMN_1730416	0.00938	0.000402	-3.64944	-0.29898	-1.17824	CYCS	cytochrome c, somatic
ILMN_1736911	0.00943	0.000405	-3.65245	-0.302104	-3.39822	TMOD1	tropomodulin 1
ILMN_1694305	0.0094	0.000403	3.64844	-0.302196	0.84206
ILMN_1710974	0.00946	0.000407	-3.64574	-0.31086	-2.07898	RGS2	regulator of G-protein signaling 2
ILMN_1657838	0.00949	0.000411	-3.65284	-0.311871	-3.17956	KDM8	lysine demethylase 8
ILMN_1713985	0.00948	0.000409	3.64539	-0.314417	0.933591	MAF1	MAF1 homolog, negative regulator of RNA polymerase III
ILMN_1706992	0.0126	0.00061	4.31166	-0.318392	7.45072
ILMN_1709486	0.00949	0.000411	-3.643	-0.31962	-2.69517	SRPX	sushi repeat containing protein, X-linked
ILMN_1767811	0.00949	0.000411	3.64288	-0.319997	1.16359	ZNF416	zinc finger protein 416
ILMN_1690703	0.00949	0.000412	-3.64248	-0.321293	-1.90275	MIR99AHG	mir-99a-let-7c cluster host gene
ILMN_1728535	0.00949	0.000412	3.64248	-0.321293	0.795533	COPZ1	coatomer protein complex subunit zeta 1
ILMN_1679438	0.0095	0.000413	3.64191	-0.323115	1.58424	CENPU	centromere protein U
ILMN_1720124	0.0095	0.000413	3.64154	-0.324281	1.12564	RCC2	regulator of chromosome condensation 2
ILMN_1759097	0.00953	0.000415	-3.64031	-0.328227	-1.70941	MLLT11	myeloid/lymphoid or mixed-lineage leukemia; translocated to, 11
ILMN_1782412	0.01	0.000445	3.62785	-0.328947	3.10481	IRX2	iroquois homeobox 2
ILMN_1768816	0.01	0.000444	3.6229	-0.331581	2.22909	TMPO	thymopoietin
ILMN_1712639	0.00959	0.000418	3.63807	-0.335409	1.16468	AIFM2	apoptosis inducing factor, mitochondria associated 2
ILMN_1711015	0.00961	0.00042	-3.64184	-0.335929	-3.94854	CRYAA	crystallin alpha A
ILMN_1782057	0.0096	0.000419	-3.63741	-0.337508	-1.45204	ATP8B2	ATPase phospholipid transporting 8B2
ILMN_1731374	0.00961	0.00042	-3.63677	-0.339538	-2.52518	CPE	carboxypeptidase E
ILMN_1755835	0.0101	0.000449	3.61948	-0.342414	1.43613
ILMN_1767992	0.00969	0.000424	3.635	-0.347631	1.16767	SLC12A6	solute carrier family 12 member 6
ILMN_1708105	0.0102	0.000454	3.61757	-0.350936	1.62392	EZH2	enhancer of zeste 2 polycomb repressive complex 2 subunit
ILMN_1794643	0.00973	0.000426	-3.63244	-0.353384	-1.20777
ILMN_1691223	0.0127	0.000615	3.66582	-0.356797	4.44443	ZNF566	zinc finger protein 566
ILMN_1737612	0.00985	0.000434	3.63487	-0.363405	2.92088	ANXA13	annexin A13
ILMN_1672876	0.00984	0.000433	3.62824	-0.366807	1.3262	MELTF	melanotransferrin
ILMN_1754395	0.00984	0.000433	3.62806	-0.36736	0.821019	COQ8B	coenzyme Q8B
ILMN_1749829	0.0118	0.000559	3.56638	-0.368309	6.18338	DLGAP5	DLG associated protein 5
ILMN_1801441	0.00985	0.000434	-3.62721	-0.370072	-1.84331	RFTN2	raftlin family member 2
ILMN_1808458	0.00993	0.000438	3.6246	-0.378399	0.565453	CPSF3	cleavage and polyadenylation specific factor 3
ILMN_1669410	0.0114	0.00053	-3.78534	-0.379178	-4.65334	CHGA	chromogranin A
ILMN_1759277	0.0105	0.000478	3.62237	-0.382559	2.84842	OIP5	Opa interacting protein 5
ILMN_1714586	0.0101	0.000451	-3.63797	-0.386537	-2.71105	VGLL3	vestigial like family member 3
ILMN_1804832	0.01	0.000443	-3.62239	-0.387842	-4.98915	RNASE4	ribonuclease A family member 4
ILMN_1808202	0.0101	0.000446	3.61967	-0.394124	1.06249	R3HDM4	R3H domain containing 4
ILMN_1709484	0.0112	0.000512	3.58256	-0.397047	1.83028	BLM	Bloom syndrome RecQ like helicase
ILMN_1701308	0.0101	0.000448	3.61826	-0.398624	2.37491	COL1A1	collagen type I alpha 1 chain
ILMN_1653162	0.0102	0.000453	-3.62608	-0.399494	-4.83697	HSD17B6	hydroxysteroid 17-beta dehydrogenase 6
ILMN_1679415	0.0102	0.000453	3.61604	-0.408027	1.40168	CNOT9	CCR4-NOT transcription complex subunit 9
ILMN_1717461	0.0107	0.000488	3.6089	-0.4085	2.3815
ILMN_1789616	0.0102	0.000455	3.61439	-0.413293	0.709526	NUPL2	nucleoporin like 2
ILMN_1813704	0.0102	0.000458	3.61206	-0.418337	3.33507	CEMIP	cell migration inducing hyaluronan binding protein
ILMN_1812570	0.0114	0.000526	3.57747	-0.420376	2.25613	SHC1	SHC adaptor protein 1
ILMN_1705035	0.0103	0.000464	-3.61668	-0.423707	-1.72929	FBXL7	F-box and leucine rich repeat protein 7
ILMN_1722244	0.0103	0.000461	-3.61008	-0.424626	-2.59442	ZBTB16	zinc finger and BTB domain containing 16
ILMN_1807674	0.0103	0.000461	3.61074	-0.424881	1.30161	ARRDC1	arrestin domain containing 1
ILMN_1776119	0.0104	0.000465	3.60711	-0.434087	0.950821	ABCC10	ATP binding cassette subfamily C member 10
ILMN_1812441	0.0104	0.000468	3.60565	-0.438728	1.22251	FAM222B	family with sequence similarity 222 member B
ILMN_1765522	0.0128	0.000626	3.59719	-0.441881	4.36214	PPM1G	protein phosphatase, Mg2+/Mn2+ dependent 1G
ILMN_1812526	0.0117	0.000546	3.58005	-0.443753	3.66111	TGFB2	transforming growth factor beta 2
ILMN_1805228	0.0105	0.000471	-3.60372	-0.444844	-2.68313	LRG1	leucine rich alpha-2-glycoprotein 1
ILMN_1743205	0.0105	0.000472	3.60295	-0.44729	1.95476
ILMN_1724946	0.0105	0.000474	3.60204	-0.450158	1.99132	SPINT1	serine peptidase inhibitor, Kunitz type 1
ILMN_1690963	0.0105	0.000475	3.6013	-0.452512	1.10907	ASAP1	ArfGAP with SH3 domain, ankyrin repeat and PH domain 1
ILMN_1731484	0.0105	0.000475	3.60126	-0.452637	0.773243	RHOT1	ras homolog family member T1
ILMN_1730049	0.0105	0.000476	-3.60075	-0.454271	-2.8054
ILMN_1702197	0.0105	0.000476	3.60134	-0.454707	2.4103	SAPCD2	suppressor APC domain containing 2
ILMN_1721055	0.0131	0.000648	3.64857	-0.455066	3.41107
ILMN_1717639	0.0105	0.000478	-3.59938	-0.458625	-1.68223	SIK1	salt inducible kinase 1
ILMN_1734804	0.0126	0.000611	3.56274	-0.466379	3.62369	KCNJ9	potassium voltage-gated channel subfamily J member 9
ILMN_1714709	0.0107	0.000484	-3.59593	-0.469546	-2.54944	OLFM1	olfactomedin 1
ILMN_1766185	0.0107	0.000487	3.59415	-0.475191	1.03199	AXIN1	axin 1
ILMN_1746376	0.0112	0.000515	-3.62772	-0.485338	-2.90803	SCARA3	scavenger receptor class A member 3
ILMN_1760820	0.0109	0.000498	-3.58769	-0.495646	-1.45434	SPRY2	sprouty RTK signaling antagonist 2
ILMN_1716336	0.0114	0.000531	3.56984	-0.49635	1.09754	CKAP5	cytoskeleton associated protein 5
ILMN_1782861	0.0111	0.000506	-3.59599	-0.499776	-2.10435	C10orf82	chromosome 10 open reading frame 82
ILMN_1678086	0.0115	0.000534	3.56918	-0.500721	2.19311	CCDC74A	coiled-coil domain containing 74A
ILMN_1730218	0.0117	0.000551	-3.59569	-0.501603	-2.58615
ILMN_1666503	0.0111	0.000506	-3.58308	-0.510203	-1.41393	DENND2A	DENN domain containing 2A
ILMN_1755727	0.0111	0.000507	3.58243	-0.512252	1.07617	KDM5B	lysine demethylase 5B
ILMN_1788017	0.013	0.000635	3.5263	-0.517357	3.17111	HSH2D	hematopoietic SH2 domain containing
ILMN_1723440	0.0112	0.000514	-3.5846	-0.519624	-1.95712	DOCK3	dedicator of cytokinesis 3
ILMN_1738179	0.0112	0.000513	3.58085	-0.521826	1.71502	FOXP1	forkhead box P1
ILMN_1652952	0.0117	0.000551	3.56866	-0.52232	2.52639	RASAL2	RAS protein activator like 2
ILMN_1745332	0.0112	0.000515	3.58057	-0.525027	1.57453	PPP5C	protein phosphatase 5 catalytic subunit
ILMN_1775211	0.0114	0.000526	-3.58958	-0.531419	-2.30864	ERO1B	endoplasmic reticulum oxidoreductase 1 beta
ILMN_1670903	0.0113	0.000519	-3.5783	-0.532164	-4.30644	NAT2	N-acetyltransferase 2
ILMN_1746962	0.0147	0.000768	4.95142	-0.532261	4.66357	MAGEA8	MAGE family member A8
ILMN_1666902	0.0125	0.000602	3.55074	-0.533338	3.1637	ADGRG5	adhesion G protein-coupled receptor G5
ILMN_1781680	0.0113	0.000519	3.57538	-0.534527	0.732098	DAP3	death associated protein 3
ILMN_1802620	0.0113	0.00052	3.57501	-0.535698	0.619254	TLK2	tousled like kinase 2
ILMN_1687967	0.0114	0.000526	-3.58097	-0.538661	-2.70143	NTRK3	neurotrophic receptor tyrosine kinase 3
ILMN_1811933	0.0114	0.00053	-3.56936	-0.553508	-2.28154	SHMT1	serine hydroxymethyltransferase 1
ILMN_1669768	0.0114	0.00053	-3.56915	-0.554178	-1.23947	JUN	Jun proto-oncogene, AP-1 transcription factor subunit
ILMN_1666934	0.0138	0.000702	3.67243	-0.55463	3.56457	GRIK2	glutamate ionotropic receptor kainate type subunit 2
ILMN_1653765	0.0117	0.000546	3.5887	-0.556675	2.36403	GALE	UDP-galactose-4-epimerase
ILMN_1729179	0.0116	0.000538	3.56587	-0.566722	0.858522	SPATA5L1	spermatogenesis associated 5 like 1
ILMN_1736238	0.0116	0.000539	-3.56553	-0.567786	-3.2535	GNMT	glycine N-methyltransferase
ILMN_1682301	0.0129	0.000628	-3.62302	-0.569333	-2.52232	OPCML	opioid binding protein/cell adhesion molecule like
ILMN_1672536	0.0116	0.00054	-3.56406	-0.570205	-2.78545	FBLN1	fibulin 1
ILMN_1713163	0.0116	0.00054	3.56365	-0.571479	0.892827	SMARCA5	SWI/SNF related, matrix associated, actin dependent regulator of chromatin, subfamily a, member 5
ILMN_1766157	0.0117	0.00055	-3.57271	-0.575224	-2.6503	MRVI1	murine retrovirus integration site 1 homolog
ILMN_1766079	0.0131	0.000645	3.55719	-0.576178	4.28211	SULT1C2	sulfotransferase family 1C member 2
ILMN_1748258	0.0122	0.000581	3.54707	-0.576735	1.48657
ILMN_1740276	0.0117	0.000549	3.56291	-0.582867	3.04594	CLDN9	claudin 9
ILMN_1670547	0.0152	0.000801	3.75643	-0.583656	5.93426
ILMN_1797905	0.0117	0.000551	3.5578	-0.589883	2.00782	HIST2H4A	histone cluster 2, H4a
ILMN_1681136	0.0118	0.000554	3.55822	-0.592988	1.80026	CCDC33	coiled-coil domain containing 33
ILMN_1750122	0.0118	0.000555	-3.55555	-0.596942	-1.39112	CTSF	cathepsin F
ILMN_1708987	0.0118	0.000557	3.55494	-0.59886	1.35258	HSD11B1L	hydroxysteroid 11-beta dehydrogenase 1 like
ILMN_1687848	0.0118	0.00056	-3.55636	-0.601072	-3.36357	C7	complement component 7
ILMN_1664016	0.0119	0.000563	3.55181	-0.608677	1.16362	ARHGEF18	Rho/Rac guanine nucleotide exchange factor 18
ILMN_1741371	0.0119	0.000564	3.55088	-0.611604	1.27844	TMEM8A	transmembrane protein 8A
ILMN_1783149	0.012	0.000568	-3.55596	-0.611788	-2.60406	CDH23	cadherin-related 23
ILMN_1715760	0.012	0.000567	3.55257	-0.612933	1.8115	LGALS9	galectin 9
ILMN_1738675	0.012	0.000567	3.54933	-0.61648	1.11523	PTPN6	protein tyrosine phosphatase, non-receptor type 6
ILMN_1663616	0.0121	0.000574	3.54606	-0.626714	0.630959	DNAJC7	DnaJ heat shock protein family (Hsp40) member C7
ILMN_1716169	0.0121	0.000576	3.54513	-0.62964	1.20872	MIF	macrophage migration inhibitory factor (glycosylation-inhibiting factor)
ILMN_1685916	0.0127	0.000618	3.52806	-0.633359	2.64435	KIF2C	kinesin family member 2C
ILMN_1721358	0.0122	0.000579	3.54332	-0.635306	1.31104	GIPC1	GIPC PDZ domain containing family member 1
ILMN_1772328	0.0122	0.00058	-3.54279	-0.63695	-4.5889	FABP1	fatty acid binding protein 1
ILMN_1807067	0.0123	0.000587	3.55099	-0.637354	3.09121	TLDC2	TBC/LysM-associated domain containing 2
ILMN_1678235	0.0122	0.000582	3.54268	-0.639452	0.951237	KANSL1	KAT8 regulatory NSL complex subunit 1
ILMN_1695829	0.0123	0.000586	-3.54357	-0.643365	-1.55248	TTYH2	tweety family member 2
ILMN_1711092	0.0126	0.000611	-3.57354	-0.645311	-1.89494	KCNB1	potassium voltage-gated channel subfamily B member 1
ILMN_1666325	0.0136	0.000684	3.51232	-0.649945	2.10382	ALG10B	ALG10B, alpha-1,2-glucosyltransferase
ILMN_1654262	0.0123	0.00059	3.53767	-0.653001	1.12146	ZMAT3	zinc finger matrin-type 3
ILMN_1773964	0.0124	0.000593	3.53651	-0.656618	0.907127	H1FX	H1 histone family member X
ILMN_1778668	0.0124	0.000593	-3.53647	-0.656728	-1.48419	TAGLN	transgelin
ILMN_1788818	0.0155	0.000825	3.48708	-0.65881	3.67254	TET2	tet methylcytosine dioxygenase 2
ILMN_1788099	0.0124	0.000597	3.53445	-0.663054	1.03727	LSM4	LSM4 homolog, U6 small nuclear RNA and mRNA degradation associated
ILMN_1763916	0.013	0.000643	3.52022	-0.666975	2.08487	ACVR1B	activin A receptor type 1B
ILMN_1663648	0.0126	0.000606	-3.53286	-0.674524	-2.50666	MTUS1	microtubule associated tumor suppressor 1
ILMN_1701017	0.0127	0.000615	-3.5429	-0.675978	-4.9973	SAA1	serum amyloid A1
ILMN_1718990	0.0126	0.000608	3.529	-0.680095	1.13136	NFRKB	nuclear factor related to kappaB binding protein
ILMN_1760121	0.0126	0.00061	3.5281	-0.682892	0.785284	RRAGC	Ras related GTP binding C
ILMN_1712913	0.0132	0.000655	3.50904	-0.687718	3.01967	UNC5A	unc-5 netrin receptor A
ILMN_1671703	0.0127	0.000615	-3.52574	-0.690253	-1.37666	ACTA2	actin, alpha 2, smooth muscle, aorta
ILMN_1751425	0.0127	0.000617	3.52453	-0.694029	1.28691	ERMP1	endoplasmic reticulum metallopeptidase 1
ILMN_1743316	0.0127	0.000617	3.52452	-0.694078	1.45016	FAM109A	family with sequence similarity 109 member A
ILMN_1709094	0.0129	0.000631	-3.53817	-0.696299	-2.71204	LIFR	leukemia inhibitory factor receptor alpha
ILMN_1689004	0.0128	0.000623	3.52188	-0.702293	1.57198	TNFRSF12A	TNF receptor superfamily member 12A
ILMN_1814611	0.0167	0.000911	3.63352	-0.704861	6.13035
ILMN_1684836	0.0129	0.000632	-3.51854	-0.71478	-2.07371	AKAP12	A-kinase anchoring protein 12
ILMN_1711909	0.0129	0.000633	3.51691	-0.717777	0.784198	EDEM2	ER degradation enhancing alpha-mannosidase like protein 2
ILMN_1749930	0.013	0.00064	3.51659	-0.725128	1.92361	NDC1	NDC1 transmembrane nucleoporin
ILMN_1812474	0.013	0.000639	3.51445	-0.725444	0.872093	TFG	TRK-fused gene
ILMN_1732071	0.013	0.000639	3.51438	-0.725667	1.86389	HIST2H2BE	histone cluster 2, H2be
ILMN_1767662	0.013	0.000641	3.51318	-0.72938	1.12681	CERS6	ceramide synthase 6
ILMN_1702858	0.013	0.000642	-3.51317	-0.729426	-2.14075	ADHFE1	alcohol dehydrogenase, iron containing 1
ILMN_1676449	0.013	0.000642	-3.51292	-0.730192	-1.60007	SLIT2	slit guidance ligand 2
ILMN_1776021	0.0131	0.000645	3.51152	-0.734544	0.707214	EIF4H	eukaryotic translation initiation factor 4H
ILMN_1813027	0.0131	0.000646	3.51117	-0.735645	1.24473	TRIM41	tripartite motif containing 41
ILMN_1773126	0.0132	0.000653	3.51585	-0.738763	1.74089	FANK1	fibronectin type III and ankyrin repeat domains 1
ILMN_1791840	0.0131	0.000651	3.50905	-0.742246	0.747782	RALBP1	ralA binding protein 1
ILMN_1775814	0.0132	0.000655	-3.50972	-0.746435	-3.30421	GHR	growth hormone receptor
ILMN_1800598	0.0133	0.000662	3.5037	-0.758865	0.822877	MRPL15	mitochondrial ribosomal protein L15
ILMN_1704746	0.0133	0.000664	3.50303	-0.760934	1.80979	SEZ6L2	seizure related 6 homolog like 2
ILMN_1714067	0.0134	0.000672	-3.51175	-0.761169	-3.30116	NTRK2	neurotrophic receptor tyrosine kinase 2
ILMN_1694475	0.0133	0.000665	3.50355	-0.761358	1.74276	GTPBP2	GTP binding protein 2
ILMN_1729987	0.0133	0.000665	3.50242	-0.762834	1.29135	SRC	SRC proto-oncogene, non-receptor tyrosine kinase
ILMN_1696828	0.0134	0.000667	3.50443	-0.76285	1.71166	RGS14	regulator of G-protein signaling 14
ILMN_1715173	0.0134	0.000668	3.50127	-0.766384	1.54354	RPS6KA1	ribosomal protein S6 kinase A1
ILMN_1654864	0.0134	0.000674	3.50763	-0.7665	1.99743	BROX	BRO1 domain and CAAX motif containing
ILMN_1695590	0.0134	0.000672	-3.49953	-0.771803	-1.9043	ADRB2	adrenoceptor beta 2
ILMN_1742544	0.0134	0.000672	-3.49939	-0.772224	-1.38652	MEF2C	myocyte enhancer factor 2C
ILMN_1718093	0.0134	0.000674	3.49867	-0.774463	0.959629	ALG1	ALG1, chitobiosyldiphosphodolichol beta-mannosyltransferase
ILMN_1717903	0.0134	0.000674	-3.49857	-0.774764	-0.799135	IL1F10	interleukin 1 family member 10 (theta)
ILMN_1787370	0.0135	0.000679	3.50231	-0.775969	1.42502	NDUFAF7	NADH:ubiquinone oxidoreductase complex assembly factor 7
ILMN_1728671	0.0134	0.000675	-3.49795	-0.776693	-1.33612	CRAT	carnitine O-acetyltransferase
ILMN_1815079	0.0135	0.000681	3.49531	-0.784874	1.31722	TICAM1	toll like receptor adaptor molecule 1
ILMN_1665562	0.0138	0.000707	-3.52192	-0.785132	-2.57458	PLIN1	perilipin 1
ILMN_1803559	0.0142	0.000732	3.48059	-0.786164	3.16432
ILMN_1672969	0.0135	0.000683	3.49457	-0.787157	1.63487	C3orf52	chromosome 3 open reading frame 52
ILMN_1668125	0.0139	0.000711	-3.51992	-0.791159	-2.53224	MYRIP	myosin VIIA and Rab interacting protein
ILMN_1805216	0.0136	0.000688	-3.49229	-0.794235	-0.994267	GPC6	glypican 6
ILMN_1673863	0.0136	0.000689	-3.49207	-0.794909	-1.99459	AIF1L	allograft inflammatory factor 1 like
ILMN_1808114	0.0137	0.000698	-3.50158	-0.794936	-3.04095	LYVE1	lymphatic vessel endothelial hyaluronan receptor 1
ILMN_1668063	0.0137	0.000693	-3.49104	-0.800117	-2.80905	FCN1	ficolin 1
ILMN_1674390	0.0137	0.000695	3.48946	-0.802998	1.37037	PRKAR1B	protein kinase cAMP-dependent type I regulatory subunit beta
ILMN_1728979	0.0138	0.000702	3.49623	-0.803941	2.55899	CCDC74B	coiled-coil domain containing 74B
ILMN_1768020	0.0137	0.000696	3.4898	-0.803954	1.11827	HAUS8	HAUS augmin like complex subunit 8
ILMN_1722673	0.0138	0.0007	-3.49188	-0.805918	-2.3122	PCDHB4	protocadherin beta 4
ILMN_1720829	0.0137	0.000698	-3.48813	-0.807099	-1.43436	ZFP36	ZFP36 ring finger protein
ILMN_1814573	0.0138	0.000701	3.48781	-0.810094	0.910138	CMTR2	cap methyltransferase 2
ILMN_1677509	0.0138	0.000702	3.48653	-0.81205	1.90419	PRR7	proline rich 7 (synaptic)
ILMN_1691457	0.0145	0.000754	3.47177	-0.813077	2.22951	APOBEC3B	apolipoprotein B mRNA editing enzyme catalytic subunit 3B
ILMN_1754660	0.0138	0.000705	-3.48502	-0.816714	-1.52763	ZCCHC24	zinc finger CCHC-type containing 24
ILMN_1762091	0.0155	0.000822	3.45206	-0.820468	2.95387	CATSPERB	cation channel sperm associated auxiliary subunit beta
ILMN_1810703	0.0139	0.000712	3.48302	-0.824881	1.58901	FANCD2	Fanconi anemia complementation group D2
ILMN_1768391	0.0139	0.000713	3.48169	-0.827	1.54074	ARL4C	ADP ribosylation factor like GTPase 4C
ILMN_1683178	0.014	0.000718	-3.48058	-0.832415	-1.33866	JAK2	Janus kinase 2
ILMN_1811472	0.014	0.00072	3.4789	-0.835614	1.02189	KIF23	kinesin family member 23
ILMN_1784105	0.014	0.000721	3.47843	-0.837092	1.10742	SLC38A7	solute carrier family 38 member 7
ILMN_1718813	0.0167	0.000912	3.42284	-0.838433	2.36047	CNKSR1	connector enhancer of kinase suppressor of Ras 1
ILMN_1728225	0.0157	0.00084	3.44139	-0.842895	2.67487	KIAA1524	KIAA1524
ILMN_1702911	0.0141	0.000728	-3.47562	-0.845755	-1.00988	PKIG	protein kinase (cAMP-dependent, catalytic) inhibitor gamma
ILMN_1703946	0.0142	0.000733	3.47551	-0.850076	2.53813	ADORA2B	adenosine A2b receptor
ILMN_1714515	0.0142	0.000734	3.47341	-0.852553	1.09222	MRPS12	mitochondrial ribosomal protein S12
ILMN_1665877	0.0142	0.000734	3.47329	-0.852925	0.700036	RNF149	ring finger protein 149
ILMN_1676458	0.0168	0.000927	3.41684	-0.853508	2.53449	MRPL11	mitochondrial ribosomal protein L11
ILMN_1656477	0.0142	0.000735	3.4727	-0.854741	1.23014	ARSA	arylsulfatase A
ILMN_1764165	0.0142	0.000737	3.47373	-0.855548	1.50856	TRIM65	tripartite motif containing 65
ILMN_1715417	0.0146	0.000757	-3.49134	-0.857012	-2.71939	SELP	selectin P
ILMN_1781149	0.0143	0.000739	-3.47138	-0.858831	-2.25	INMT	indolethylamine N-methyltransferase
ILMN_1749324	0.0143	0.000744	-3.47016	-0.864537	-3.59248	DPYS	dihydropyrimidinase
ILMN_1665916	0.0148	0.000775	-3.49366	-0.869997	-1.80125	HYAL2	hyaluronoglucosaminidase 2
ILMN_1677018	0.0146	0.000757	-3.4695	-0.876854	-2.14224	HOXA4	homeobox A4
ILMN_1789001	0.0145	0.000754	3.46595	-0.877498	0.899551	SLC35B2	solute carrier family 35 member B2
ILMN_1676880	0.0148	0.000776	-3.48246	-0.88073	-2.45259	CORO2B	coronin 2B
ILMN_1690241	0.0146	0.000763	3.4618	-0.888325	1.72766	BATF2	basic leucine zipper ATF-like transcription factor 2
ILMN_1737198	0.0147	0.000765	3.46106	-0.890581	1.08791	CSNK1D	casein kinase 1 delta
ILMN_1793118	0.0147	0.000767	3.45999	-0.893877	0.631798	TAX1BP1	Tax1 binding protein 1
ILMN_1790008	0.0147	0.00077	-3.45905	-0.896751	-1.30699	CYP2U1	cytochrome P450 family 2 subfamily U member 1
ILMN_1814808	0.0147	0.00077	3.45886	-0.897355	0.832184	BFAR	bifunctional apoptosis regulator
ILMN_1810652	0.0156	0.000833	3.44934	-0.897554	2.47463	LMBRD2	LMBR1 domain containing 2
ILMN_1663827	0.0155	0.000829	3.43856	-0.90364	1.5255	SMYD5	SMYD family member 5
ILMN_1808122	0.0149	0.000782	-3.46283	-0.903861	-1.80165
ILMN_1746661	0.0201	0.0012	3.63358	-0.905625	7.41119	ERCC8	ERCC excision repair 8, CSA ubiquitin ligase complex subunit
ILMN_1749212	0.0149	0.00078	3.45608	-0.907814	1.59517	TMEM189-UBE2V1	TMEM189-UBE2V1 readthrough
ILMN_1703531	0.0149	0.000781	-3.45467	-0.910214	-1.59464	S1PR3	sphingosine-1-phosphate receptor 3
ILMN_1691736	0.0149	0.000783	-3.45382	-0.912811	-1.1411	ST6GALNAC6	ST6 N-acetylgalactosaminide alpha-2,6-sialyltransferase 6
ILMN_1785646	0.0149	0.000785	-3.45333	-0.914335	-1.74536	PMP22	peripheral myelin protein 22
ILMN_1684035	0.0149	0.000787	3.45233	-0.917393	0.957493	ANAPC7	anaphase promoting complex subunit 7
ILMN_1689955	0.0157	0.000843	3.43264	-0.919668	1.47454	FAAP24	Fanconi anemia core complex associated protein 24
ILMN_1681544	0.0167	0.000923	-3.49875	-0.924239	-3.18141	RASGEF1C	RasGEF domain family member 1C
ILMN_1717206	0.0151	0.000795	-3.44941	-0.926367	-1.18758	CLEC14A	C-type lectin domain family 14 member A
ILMN_1695003	0.0189	0.00109	-3.68787	-0.928873	-2.31716	PCSK2	proprotein convertase subtilisin/kexin type 2
ILMN_1729188	0.0151	0.000798	-3.44837	-0.929555	-4.63288	HAMP	hepcidin antimicrobial peptide
ILMN_1688299	0.0151	0.0008	3.44768	-0.931648	1.08364	RCAN3	RCAN family member 3
ILMN_1700762	0.0181	0.00102	3.39297	-0.93874	3.78138	PBX4	PBX homeobox 4
ILMN_1738514	0.0152	0.000807	3.44494	-0.940038	0.81129	PPP1R35	protein phosphatase 1 regulatory subunit 35
ILMN_1653504	0.0152	0.000807	-3.44483	-0.940374	-1.75896	S1PR1	sphingosine-1-phosphate receptor 1
ILMN_1799600	0.0152	0.000808	-3.44453	-0.941294	-1.27266	STARD8	StAR related lipid transfer domain containing 8
ILMN_1692665	0.017	0.000939	3.40664	-0.944595	2.94316	UNC5B	unc-5 netrin receptor B
ILMN_1815083	0.0153	0.000812	3.44289	-0.946326	1.00456	NELFA	negative elongation factor complex member A
ILMN_1716847	0.0154	0.000818	-3.44181	-0.951509	-1.45937	FADS3	fatty acid desaturase 3
ILMN_1779432	0.0155	0.000824	3.43962	-0.958218	1.21689	TIPRL	TOR signaling pathway regulator
ILMN_1741688	0.0155	0.000825	-3.43927	-0.95928	-2.1232	CPXM2	carboxypeptidase X, M14 family member 2
ILMN_1790562	0.0164	0.000889	3.42433	-0.961224	2.17826	EYA3	EYA transcriptional coactivator and phosphatase 3
ILMN_1743199	0.0155	0.000827	-3.43859	-0.961351	-1.97369	EGR2	early growth response 2
ILMN_1815690	0.0155	0.000829	-3.43669	-0.96529	-1.47213	TIE1	tyrosine kinase with immunoglobulin like and EGF like domains 1
ILMN_1658261	0.0156	0.000832	3.43745	-0.966744	1.59437	MAPKBP1	mitogen-activated protein kinase binding protein 1
ILMN_1653310	0.0157	0.000841	3.44109	-0.970006	2.21965	ZNF580	zinc finger protein 580
ILMN_1788166	0.0196	0.00115	3.3458	-0.973356	4.57138	TTK	TTK protein kinase
ILMN_1658231	0.0157	0.000842	3.43376	-0.978	1.50043	NACC1	nucleus accumbens associated 1
ILMN_1757604	0.0158	0.000849	-3.42971	-0.986601	-1.8292	TPM2	tropomyosin 2 (beta)
ILMN_1668055	0.0158	0.000852	-3.43112	-0.987967	-4.88495	SAA4	serum amyloid A4, constitutive
ILMN_1807689	0.0158	0.000853	-3.43008	-0.989232	-1.25004	PKNOX2	PBX/knotted 1 homeobox 2
ILMN_1797611	0.0158	0.000852	3.42873	-0.989614	1.15796	TGFBR1	transforming growth factor beta receptor 1
ILMN_1706440	0.0177	0.000989	3.38993	-0.992186	2.84599	MDK	midkine (neurite growth-promoting factor 2)
ILMN_1666845	0.0159	0.000859	3.42631	-0.996981	4.26848	KRT17	keratin 17
ILMN_1657361	0.0159	0.000859	-3.42624	-0.997208	-1.15528	CBX7	chromobox 7
ILMN_1765578	0.016	0.000866	-3.42358	-1.00531	-1.29048	TIPARP	TCDD inducible poly(ADP-ribose) polymerase
ILMN_1757477	0.0162	0.000879	-3.42956	-1.00936	-3.77541	GLYAT	glycine-N-acyltransferase
ILMN_1775566	0.0161	0.000871	3.42204	-1.00999	1.69837	ATP1A1	ATPase Na+/K+ transporting subunit alpha 1
ILMN_1687626	0.0161	0.000872	3.42156	-1.01147	1.13299	ZDHHC24	zinc finger DHHC-type containing 24
ILMN_1788701	0.0161	0.000875	-3.42072	-1.01403	-1.13456	PSIP1	PC4 and SFRS1 interacting protein 1
ILMN_1766658	0.0204	0.00123	3.33102	-1.01578	5.63472	PKMYT1	protein kinase, membrane associated tyrosine/threonine 1
ILMN_1685371	0.0164	0.000889	3.41569	-1.02933	1.13968	SUMF2	sulfatase modifying factor 2
ILMN_1763104	0.0164	0.00089	3.41626	-1.02942	1.23181	TRAF4	TNF receptor associated factor 4
ILMN_1731014	0.0165	0.000897	-3.42038	-1.03062	-1.80045	HEMK1	HemK methyltransferase family member 1
ILMN_1655720	0.0165	0.000899	3.41258	-1.0388	1.24318	CNNM4	cyclin and CBS domain divalent metal cation transport mediator 4
ILMN_1766165	0.0167	0.000919	-3.42787	-1.03892	-2.98191	SNCA	synuclein alpha
ILMN_1688894	0.0166	0.000903	3.41463	-1.04	1.90811
ILMN_1754145	0.0166	0.000903	3.41097	-1.04367	0.914576	CAPRIN1	cell cycle associated protein 1
ILMN_1652472	0.0184	0.00105	3.37007	-1.04517	2.17647	BRAF	B-Raf proto-oncogene, serine/threonine kinase
ILMN_1677590	0.0166	0.000909	3.40994	-1.04861	1.2259	RAP2B	RAP2B, member of RAS oncogene family
ILMN_1685676	0.0174	0.000973	3.3894	-1.05035	1.32263	TTC9C	tetratricopeptide repeat domain 9C
ILMN_1767365	0.0167	0.000914	3.40763	-1.05382	1.07004	PAK1	p21 (RAC1) activated kinase 1
ILMN_1651343	0.0167	0.00092	3.4108	-1.05551	2.57683	ITGA11	integrin subunit alpha 11
ILMN_1790637	0.0167	0.000916	3.4067	-1.05666	1.97313	C11orf80	chromosome 11 open reading frame 80
ILMN_1675857	0.0171	0.00095	-3.43052	-1.05774	-2.65809	COL4A6	collagen type IV alpha 6 chain
ILMN_1689817	0.0167	0.00092	3.40553	-1.06021	0.841542	LCOR	ligand dependent nuclear receptor corepressor
ILMN_1752455	0.0167	0.000921	3.40589	-1.06091	1.17874	DOCK5	dedicator of cytokinesis 5
ILMN_1681802	0.0167	0.000922	3.40473	-1.06264	1.02904	GRK6	G protein-coupled receptor kinase 6
ILMN_1743367	0.0168	0.00093	-3.40223	-1.07022	-1.35142	FZD4	frizzled class receptor 4
ILMN_1774739	0.0169	0.000934	3.40263	-1.07262	2.35673	MMP14	matrix metallopeptidase 14
ILMN_1754174	0.017	0.000942	3.39825	-1.08228	1.98338	LOXL4	lysyl oxidase like 4
ILMN_1709439	0.017	0.000943	3.39798	-1.08308	0.9507	CHMP1A	charged multivesicular body protein 1A
ILMN_1789274	0.0185	0.00105	3.40629	-1.08794	3.41591	FBXO17	F-box protein 17
ILMN_1790103	0.0171	0.000949	-3.39602	-1.08903	-0.983098	ZNF569	zinc finger protein 569
ILMN_1741585	0.0172	0.000953	3.3958	-1.09146	1.02119	SFMBT1	Scm-like with four mbt domains 1
ILMN_1761147	0.0172	0.000955	3.39425	-1.09439	0.939059	GABPB1	GA binding protein transcription factor beta subunit 1
ILMN_1726196	0.0172	0.000956	-3.39471	-1.09477	-1.4307	GATA2	GATA binding protein 2
ILMN_1813304	0.0173	0.000966	-3.3917	-1.10385	-1.55806	ZNF367	zinc finger protein 367
ILMN_1745785	0.0173	0.000966	-3.39062	-1.10537	-0.871607	NR2F2	nuclear receptor subfamily 2 group F member 2
ILMN_1679383	0.0204	0.00122	3.3248	-1.10623	2.55053	AKIRIN1	akirin 1
ILMN_1703036	0.0175	0.000976	3.38775	-1.11403	1.04859	WRNIP1	Werner helicase interacting protein 1
ILMN_1815131	0.0241	0.00161	3.61676	-1.11909	5.037	PCDHGA2	protocadherin gamma subfamily A, 2
ILMN_1668022	0.0178	0.000998	-3.39518	-1.12163	-2.08928	EPHA5	EPH receptor A5
ILMN_1795170	0.0179	0.00101	-3.39535	-1.12581	-2.05198	SLITRK2	SLIT and NTRK like family member 2
ILMN_1696585	0.0196	0.00115	3.34837	-1.12744	3.63751	FERMT1	fermitin family member 1
ILMN_1793332	0.0178	0.000994	3.38218	-1.13088	0.650245	RAB3GAP2	RAB3 GTPase activating non-catalytic protein subunit 2
ILMN_1694111	0.0178	0.000994	3.38211	-1.13106	0.875844	PNKP	polynucleotide kinase 3'-phosphatase
ILMN_1707741	0.021	0.00129	3.43764	-1.13185	2.80746	TBC1D26	TBC1 domain family member 26
ILMN_1779374	0.018	0.00101	3.37746	-1.1451	0.772314	AMMECR1	Alport syndrome, mental retardation, midface hypoplasia and elliptocytosis chromosomal region gene 1
ILMN_1744963	0.018	0.00101	3.37802	-1.14513	1.39202	ERO1A	endoplasmic reticulum oxidoreductase 1 alpha
ILMN_1656812	0.0249	0.00171	-3.52901	-1.14701	-3.5536	NMRK2	nicotinamide riboside kinase 2
ILMN_1662390	0.0181	0.00102	3.37786	-1.14917	2.43687	ASPHD1	aspartate beta-hydroxylase domain containing 1
ILMN_1654775	0.0181	0.00101	3.37665	-1.14925	2.48277
ILMN_1669842	0.0181	0.00102	3.37544	-1.15117	1.28519	CHAF1A	chromatin assembly factor 1 subunit A
ILMN_1687583	0.0181	0.00102	-3.37396	-1.15565	-1.7742	CAV1	caveolin 1
ILMN_1811522	0.0181	0.00102	3.37328	-1.15769	0.883131	SCO2	SCO2 cytochrome c oxidase assembly protein
ILMN_1664679	0.0227	0.00147	-3.63008	-1.15804	-3.93078	CADM2	cell adhesion molecule 2
ILMN_1732516	0.0181	0.00102	3.37361	-1.15842	1.33694	KNTC1	kinetochore associated 1
ILMN_1701468	0.0182	0.00103	-3.37301	-1.16024	-4.11757	HGFAC	HGF activator
ILMN_1773313	0.0182	0.00103	3.37197	-1.16334	2.29156	USMG5	up-regulated during skeletal muscle growth 5 homolog (mouse)
ILMN_1675848	0.0182	0.00103	3.37128	-1.16373	0.690177	MYL12A	myosin light chain 12A
ILMN_1656422	0.0212	0.00132	3.31518	-1.16476	4.21732	GPR87	G protein-coupled receptor 87
ILMN_1665437	0.0183	0.00103	-3.37073	-1.16708	-4.72653	CYP2E1	cytochrome P450 family 2 subfamily E member 1
ILMN_1803772	0.0183	0.00104	3.3697	-1.17019	1.04437	POLD4	DNA polymerase delta 4, accessory subunit
ILMN_1667692	0.0183	0.00104	-3.36857	-1.17186	-2.29862	PTGIS	prostaglandin I2 (prostacyclin) synthase
ILMN_1722502	0.0184	0.00104	3.36744	-1.17527	0.81585	CCT6A	chaperonin containing TCP1 subunit 6A
ILMN_1671557	0.0184	0.00105	3.36687	-1.17699	2.07781	PHLDA2	pleckstrin homology like domain family A member 2
ILMN_1762439	0.0184	0.00105	3.36701	-1.17827	1.11564	TMEM259	transmembrane protein 259
ILMN_1710428	0.0215	0.00136	3.32018	-1.17865	2.4237	CDK1	cyclin dependent kinase 1
ILMN_1684336	0.0189	0.00109	3.39029	-1.18237	3.12922	VEPH1	ventricular zone expressed PH domain containing 1
ILMN_1713679	0.0193	0.00113	3.34778	-1.18383	1.85121	MREG	melanoregulin
ILMN_1658715	0.0189	0.00109	-3.38456	-1.1868	-2.19986	NRXN3	neurexin 3
ILMN_1775901	0.0185	0.00106	3.36358	-1.18687	0.948338	PHF5A	PHD finger protein 5A
ILMN_1759184	0.0185	0.00106	3.36314	-1.18819	1.21225	C19orf48	chromosome 19 open reading frame 48
ILMN_1718866	0.0194	0.00114	3.34235	-1.19449	2.8354	C5orf46	chromosome 5 open reading frame 46
ILMN_1773080	0.0187	0.00107	3.36056	-1.19593	0.488418	OAZ1	ornithine decarboxylase antizyme 1
ILMN_1811758	0.0189	0.00109	-3.37175	-1.20063	-2.64841	CNP	2',3'-cyclic nucleotide 3' phosphodiesterase
ILMN_1668910	0.0188	0.00108	-3.3589	-1.20261	-2.81134	CIDEB	cell death-inducing DFFA-like effector b
ILMN_1717868	0.0188	0.00108	3.35824	-1.20291	0.654852	CCT8	chaperonin containing TCP1 subunit 8
ILMN_1784364	0.0188	0.00108	-3.3576	-1.20483	-1.58921	STARD5	StAR related lipid transfer domain containing 5
ILMN_1696643	0.0188	0.00108	-3.35739	-1.20545	-0.897951	TLN1	talin 1
ILMN_1666192	0.0188	0.00108	3.35726	-1.20585	0.781057	DCTN5	dynactin subunit 5
ILMN_1741244	0.0189	0.00108	3.36077	-1.20587	1.64569	RBM33	RNA binding motif protein 33
ILMN_1767256	0.0188	0.00108	3.35661	-1.20778	0.862697	MBTPS1	membrane bound transcription factor peptidase, site 1
ILMN_1676159	0.0188	0.00108	3.35618	-1.20908	0.935115	STK26	serine/threonine protein kinase 26
ILMN_1783946	0.0196	0.00116	3.3377	-1.21006	2.38876	MRC2	mannose receptor C type 2
ILMN_1772833	0.0189	0.00109	-3.35698	-1.21179	-1.57983	GPR4	G protein-coupled receptor 4
ILMN_1808712	0.0189	0.00109	3.3552	-1.21202	0.808475	RNF40	ring finger protein 40
ILMN_1713249	0.0189	0.00109	-3.35443	-1.21432	-1.22224	PHF19	PHD finger protein 19
ILMN_1798204	0.0189	0.0011	3.35301	-1.22024	1.70811	IL21R	interleukin 21 receptor
ILMN_1678090	0.0189	0.0011	3.35244	-1.22028	0.43948	RPL3	ribosomal protein L3
ILMN_1751879	0.0189	0.0011	-3.35206	-1.22142	-3.30957	HSD11B1	hydroxysteroid 11-beta dehydrogenase 1
ILMN_1811315	0.019	0.0011	3.35122	-1.22393	3.70337	EEF1A2	eukaryotic translation elongation factor 1 alpha 2
ILMN_1694906	0.0191	0.00111	-3.34987	-1.22965	-2.83094	SPEG	SPEG complex locus
ILMN_1670456	0.0191	0.00111	3.3493	-1.22968	0.788428	RBM42	RNA binding motif protein 42
ILMN_1814135	0.0191	0.00111	-3.34814	-1.23318	-1.48052	RCAN1	regulator of calcineurin 1
ILMN_1722522	0.0191	0.00111	3.34797	-1.23366	0.736313	CCNT2	cyclin T2
ILMN_1664861	0.0191	0.00111	-3.34752	-1.23502	-1.60073	ID1	inhibitor of DNA binding 1, HLH protein
ILMN_1699795	0.0192	0.00112	3.34615	-1.23913	0.865322	VAMP8	vesicle associated membrane protein 8
ILMN_1667670	0.0192	0.00112	-3.34584	-1.24004	-2.02567	SLC25A15	solute carrier family 25 member 15
ILMN_1696826	0.0193	0.00113	-3.34667	-1.24262	-1.30615	DNHD1	dynein heavy chain domain 1
ILMN_1762224	0.0193	0.00113	3.34493	-1.24443	1.37137	HPS3	HPS3, biogenesis of lysosomal organelles complex 2 subunit 1
ILMN_1793628	0.0193	0.00113	-3.34381	-1.24613	-2.98508	SERPINA10	serpin family A member 10
ILMN_1753931	0.0193	0.00113	-3.34542	-1.24809	-3.72913	CDO1	cysteine dioxygenase type 1
ILMN_1709771	0.0193	0.00113	-3.34407	-1.24865	-3.06267	GLS2	glutaminase 2
ILMN_1791904	0.0194	0.00114	3.33996	-1.25764	0.726902	ATP13A1	ATPase 13A1
ILMN_1671766	0.0195	0.00115	-3.33969	-1.26008	-3.08249	F12	coagulation factor XII
ILMN_1712269	0.0196	0.00115	3.34202	-1.26177	1.72314	ZNF605	zinc finger protein 605
ILMN_1807379	0.0204	0.00123	3.31918	-1.26307	1.41968	WHSC1L1	Wolf-Hirschhorn syndrome candidate 1-like 1
ILMN_1780831	0.0196	0.00115	-3.3368	-1.26706	-2.65523	SLC6A12	solute carrier family 6 member 12
ILMN_1767801	0.0196	0.00116	3.33803	-1.26838	1.72154	SAMD10	sterile alpha motif domain containing 10
ILMN_1670096	0.0196	0.00116	3.33623	-1.26877	0.930517	NRBP1	nuclear receptor binding protein 1
ILMN_1654001	0.0196	0.00116	3.3367	-1.26899	1.37305	SMC6	structural maintenance of chromosomes 6
ILMN_1716708	0.0196	0.00116	3.33574	-1.27023	2.48883	HOXB9	homeobox B9
ILMN_1780060	0.0197	0.00117	-3.33355	-1.27676	-3.11397	FCN3	ficolin 3
ILMN_1660973	0.0206	0.00125	3.31545	-1.27752	2.41019	GAD1	glutamate decarboxylase 1
ILMN_1721462	0.0198	0.00118	3.33954	-1.27853	1.86914
ILMN_1766966	0.0198	0.00118	-3.33946	-1.27879	-4.21117
ILMN_1814494	0.02	0.00119	-3.34678	-1.27898	-2.63459	SEMA6D	semaphorin 6D
ILMN_1794085	0.0197	0.00117	3.33247	-1.27998	0.930305	PPP6R1	protein phosphatase 6 regulatory subunit 1
ILMN_1698968	0.0197	0.00117	3.33246	-1.28	0.751603	ASXL2	additional sex combs like 2, transcriptional regulator
ILMN_1796855	0.0197	0.00117	3.33214	-1.28095	0.633294	TIAL1	TIA1 cytotoxic granule-associated RNA binding protein-like 1
ILMN_1702487	0.0197	0.00117	-3.33187	-1.28178	-1.21356	SGK1	serum/glucocorticoid regulated kinase 1
ILMN_1689745	0.0197	0.00117	-3.33147	-1.28295	-1.51935	FGD5	FYVE, RhoGEF and PH domain containing 5
ILMN_1709167	0.021	0.00129	-3.39242	-1.28301	-2.86016	ADRA1A	adrenoceptor alpha 1A
ILMN_1699980	0.0198	0.00118	-3.33273	-1.28586	-2.05898	TSPAN18	tetraspanin 18
ILMN_1742382	0.0198	0.00118	-3.3302	-1.28674	-1.44838	RIMS3	regulating synaptic membrane exocytosis 3
ILMN_1784218	0.0199	0.00119	3.32755	-1.29464	0.850707	DDX23	DEAD-box helicase 23
ILMN_1769409	0.0199	0.00119	-3.32746	-1.29493	-0.850009	TMEM261	transmembrane protein 261
ILMN_1670308	0.0216	0.00136	-3.40884	-1.30268	-4.44685	GPM6B	glycoprotein M6B
ILMN_1705107	0.0201	0.0012	3.32518	-1.30332	2.06882	SDCBP2	syndecan binding protein 2
ILMN_1716651	0.021	0.00129	3.30696	-1.30423	2.24332
ILMN_1654504	0.0291	0.00217	3.54045	-1.30774	3.39678	CLEC7A	C-type lectin domain family 7 member A
ILMN_1722186	0.0201	0.00121	3.32294	-1.30836	0.592552
ILMN_1687213	0.0211	0.0013	3.30419	-1.31063	2.49312	FAM167A	family with sequence similarity 167 member A
ILMN_1704064	0.0202	0.00121	-3.32172	-1.31199	-1.04094	MAGEB1	MAGE family member B1
ILMN_1758812	0.0218	0.00139	3.34096	-1.31833	2.99295	LDHAL6A	lactate dehydrogenase A like 6A
ILMN_1789040	0.0233	0.00153	-3.40842	-1.32106	-2.91245	SLITRK5	SLIT and NTRK like family member 5
ILMN_1704500	0.0204	0.00123	3.31807	-1.32285	1.36042	STAP2	signal transducing adaptor family member 2
ILMN_1751904	0.0204	0.00123	-3.31793	-1.32325	-2.13916	EDNRB	endothelin receptor type B
ILMN_1698668	0.0204	0.00123	-3.31814	-1.32421	-1.66531	NR1D2	nuclear receptor subfamily 1 group D member 2
ILMN_1706344	0.0204	0.00123	-3.3173	-1.32514	-2.34258	ABHD6	abhydrolase domain containing 6
ILMN_1815264	0.0204	0.00123	3.31753	-1.32602	1.05744	RHBDD3	rhomboid domain containing 3
ILMN_1662935	0.0204	0.00124	-3.31631	-1.32966	-1.79643	C1QTNF7	C1q and tumor necrosis factor related protein 7
ILMN_1769575	0.0204	0.00124	-3.31559	-1.33021	-1.46838	JAM3	junctional adhesion molecule 3
ILMN_1796901	0.0216	0.00136	-3.31534	-1.33118	-2.71422	CTNNA2	catenin alpha 2
ILMN_1701243	0.0204	0.00124	3.31525	-1.33121	0.97684	C10orf2	chromosome 10 open reading frame 2
ILMN_1718770	0.0206	0.00125	-3.31769	-1.3339	-1.46954	MAMSTR	MEF2 activating motif and SAP domain containing transcriptional regulator
ILMN_1808059	0.0205	0.00124	3.31393	-1.33513	1.59929	BCAS4	breast carcinoma amplified sequence 4
ILMN_1773664	0.0206	0.00125	-3.31327	-1.34029	-1.18176	TIMP3	TIMP metallopeptidase inhibitor 3
ILMN_1688479	0.0206	0.00125	3.31135	-1.34279	0.866281	LRRC42	leucine rich repeat containing 42
ILMN_1660079	0.0206	0.00125	3.31124	-1.34312	1.05374	RNF44	ring finger protein 44
ILMN_1651404	0.0206	0.00126	-3.31212	-1.34369	-1.13229	LILRA6	leukocyte immunoglobulin like receptor A6
ILMN_1733861	0.0206	0.00125	3.31094	-1.34401	1.05601	ARHGEF11	Rho guanine nucleotide exchange factor 11
ILMN_1726161	0.0206	0.00125	3.31093	-1.34404	1.20652	PERP	PERP, TP53 apoptosis effector
ILMN_1741148	0.0208	0.00127	3.3079	-1.35302	1.36054	ALDOA	aldolase, fructose-bisphosphate A
ILMN_1790819	0.0209	0.00127	3.30635	-1.35761	0.839174
ILMN_1752668	0.0209	0.00128	-3.30642	-1.35898	-2.02285	DAAM2	dishevelled associated activator of morphogenesis 2
ILMN_1813295	0.0226	0.00147	-3.39408	-1.35959	-3.59008	LMO3	LIM domain only 3
ILMN_1708779	0.0261	0.00183	3.2159	-1.3651	4.02199	GNLY	granulysin
ILMN_1783753	0.021	0.00128	3.30368	-1.36551	0.918582	TXNDC12	thioredoxin domain containing 12
ILMN_1722851	0.0212	0.00131	-3.31618	-1.36612	-1.79673
ILMN_1777096	0.021	0.00129	3.30282	-1.36806	0.696133	TDG	thymine DNA glycosylase
ILMN_1744251	0.0211	0.0013	-3.30619	-1.3696	-1.63949	TBXA2R	thromboxane A2 receptor
ILMN_1735792	0.021	0.00129	3.30199	-1.37051	0.821717	RHBDF2	rhomboid 5 homolog 2
ILMN_1734476	0.021	0.00129	3.30252	-1.37052	1.08907	KIF2A	kinesin family member 2A
ILMN_1782730	0.0211	0.0013	3.30153	-1.37342	1.20612	ZNF473	zinc finger protein 473
ILMN_1754235	0.0211	0.0013	3.30038	-1.3753	0.726521	SLC35C2	solute carrier family 35 member C2
ILMN_1681724	0.0211	0.0013	3.2999	-1.37671	1.14614	FPGS	folylpolyglutamate synthase
ILMN_1799516	0.0211	0.0013	3.29925	-1.37863	0.787743	DNAJC9	DnaJ heat shock protein family (Hsp40) member C9
ILMN_1776953	0.0211	0.00131	-3.29862	-1.38048	-2.04319	MYL9	myosin light chain 9
ILMN_1656082	0.0212	0.00131	3.2971	-1.385	0.601004
ILMN_1754600	0.0212	0.00131	3.29695	-1.38543	1.02408	FNBP1L	formin binding protein 1 like
ILMN_1747318	0.0212	0.00131	3.29691	-1.38556	0.928303	PATJ	PATJ, crumbs cell polarity complex component
ILMN_1814600	0.0249	0.00171	3.24485	-1.3858	3.80661	DEPDC1B	DEP domain containing 1B
ILMN_1700024	0.0212	0.00132	-3.29877	-1.38637	-1.86032	UST	uronyl 2-sulfotransferase
ILMN_1679555	0.0212	0.00132	3.29577	-1.38892	0.553262	TIMM23	translocase of inner mitochondrial membrane 23
ILMN_1674985	0.0212	0.00132	3.29558	-1.38948	1.23151	TMEM51	transmembrane protein 51
ILMN_1708916	0.0212	0.00133	-3.29815	-1.38987	-1.97334	PDZD4	PDZ domain containing 4
ILMN_1651745	0.0213	0.00133	-3.3017	-1.39	-2.64529	TMEM25	transmembrane protein 25
ILMN_1777783	0.0212	0.00132	-3.29539	-1.39004	-0.751814	STAT5B	signal transducer and activator of transcription 5B
ILMN_1800739	0.0212	0.00132	3.29507	-1.391	2.002	SPINT2	serine peptidase inhibitor, Kunitz type 2
ILMN_1691487	0.0212	0.00132	3.29483	-1.3917	1.17965	TRAF2	TNF receptor associated factor 2
ILMN_1774350	0.0213	0.00134	-3.30112	-1.39171	-2.08774	MYOZ3	myozenin 3
ILMN_1730999	0.0212	0.00132	3.2943	-1.39328	0.685246	TPR	translocated promoter region, nuclear basket protein
ILMN_1791902	0.0213	0.00133	-3.29775	-1.39443	-1.9552	RARA	retinoic acid receptor alpha
ILMN_1653749	0.0213	0.00133	3.29285	-1.39755	1.05089	B4GALT5	beta-1,4-galactosyltransferase 5
ILMN_1807925	0.0214	0.00134	-3.295	-1.39915	-1.56916	GNG2	G protein subunit gamma 2
ILMN_1706859	0.0213	0.00133	-3.2923	-1.39916	-1.06719	SMDT1	single-pass membrane protein with aspartate rich tail 1
ILMN_1786229	0.0213	0.00134	3.29165	-1.40109	1.09164	WIPF2	WAS/WASL interacting protein family member 2
ILMN_1668185	0.0214	0.00134	3.2898	-1.40656	0.857983	ZNF282	zinc finger protein 282
ILMN_1762835	0.0214	0.00134	3.28954	-1.40732	0.831128	HELZ	helicase with zinc finger
ILMN_1726743	0.0214	0.00135	3.28931	-1.40799	0.807498	MRPS30	mitochondrial ribosomal protein S30
ILMN_1807101	0.0216	0.00136	-3.2952	-1.40905	-3.03147	F11	coagulation factor XI
ILMN_1784112	0.0215	0.00135	-3.28968	-1.41154	-2.75489	CTH	cystathionine gamma-lyase
ILMN_1727984	0.0241	0.00161	3.2581	-1.41479	2.88887	F8A1	coagulation factor VIII-associated 1
ILMN_1667744	0.0215	0.00136	3.28681	-1.41537	1.29631
ILMN_1788663	0.0262	0.00184	3.26774	-1.41628	3.17664	KCNQ2	potassium voltage-gated channel subfamily Q member 2
ILMN_1775170	0.0216	0.00136	-3.28632	-1.41681	-2.55634	MT1X	metallothionein 1X
ILMN_1670948	0.0216	0.00136	-3.28537	-1.41962	-0.544401	TSR2	TSR2, ribosome maturation factor
ILMN_1753613	0.0216	0.00137	-3.2854	-1.42103	-1.97356	HOXA5	homeobox A5
ILMN_1683923	0.0227	0.00148	-3.32972	-1.42522	-4.14426	MT1H	metallothionein 1H
ILMN_1811579	0.0217	0.00137	3.28389	-1.42547	1.51935	HOMER3	homer scaffolding protein 3
ILMN_1743373	0.0217	0.00137	-3.28373	-1.42595	-1.52261	DLL1	delta like canonical Notch ligand 1
ILMN_1815795	0.0217	0.00138	3.28267	-1.42755	0.919916	TSSC1	tumor suppressing subtransferable candidate 1
ILMN_1759292	0.0258	0.0018	3.23081	-1.43015	3.72515	C9orf163	chromosome 9 open reading frame 163
ILMN_1719236	0.0217	0.00138	-3.28154	-1.43088	-1.59952	CDH5	cadherin 5
ILMN_1749478	0.0217	0.00138	-3.28153	-1.43093	-1.39912	TCEAL3	transcription elongation factor A like 3
ILMN_1689720	0.0227	0.00148	3.26069	-1.43136	1.30563	PPP2R3B	protein phosphatase 2 regulatory subunit B''beta
ILMN_1782918	0.0218	0.00138	-3.28107	-1.43229	-0.866465	B4GAT1	beta-1,4-glucuronyltransferase 1
ILMN_1673591	0.0223	0.00144	-3.30586	-1.4324	-3.4163	CYP3A43	cytochrome P450 family 3 subfamily A member 43
ILMN_1657662	0.0221	0.00141	3.29285	-1.43397	2.94085	ERI2	ERI1 exoribonuclease family member 2
ILMN_1653751	0.0218	0.00139	3.27992	-1.43568	2.25707	HOPX	HOP homeobox
ILMN_1731184	0.0241	0.00162	3.23369	-1.43977	2.28649	MELK	maternal embryonic leucine zipper kinase
ILMN_1665276	0.022	0.0014	3.27728	-1.44342	0.729367	MAPK1	mitogen-activated protein kinase 1
ILMN_1760727	0.022	0.0014	-3.27723	-1.44357	-2.37753	ANG	angiogenin
ILMN_1743232	0.022	0.0014	3.27845	-1.44456	1.61972	MICALCL	MICAL C-terminal like
ILMN_1692352	0.0221	0.00141	3.2751	-1.45135	0.843687	IRAK4	interleukin 1 receptor associated kinase 4
ILMN_1764964	0.0221	0.00141	3.27419	-1.45252	0.852889	IFNGR2	interferon gamma receptor 2 (interferon gamma transducer 1)
ILMN_1803624	0.0221	0.00141	3.27392	-1.45332	1.01014	TMEM147	transmembrane protein 147
ILMN_1738147	0.0221	0.00141	-3.27382	-1.45359	-1.69557	NES	nestin
ILMN_1815032	0.0221	0.00142	-3.27374	-1.45384	-1.75257	SOX7	SRY-box 7
ILMN_1705686	0.0221	0.00142	-3.27322	-1.45537	-1.3371	NRGN	neurogranin
ILMN_1753525	0.0223	0.00144	-3.28174	-1.45589	-2.2183	TCEAL7	transcription elongation factor A like 7
ILMN_1705224	0.0222	0.00143	-3.27529	-1.45699	-1.50141	TMEM110	transmembrane protein 110
ILMN_1761442	0.0222	0.00142	3.27177	-1.45963	1.05936	WDR24	WD repeat domain 24
ILMN_1761155	0.0222	0.00143	3.27151	-1.46038	0.834396	PABPC1	poly(A) binding protein cytoplasmic 1
ILMN_1798284	0.0222	0.00143	-3.27156	-1.46172	-2.82672	MFSD2A	major facilitator superfamily domain containing 2A
ILMN_1789507	0.0261	0.00183	3.20304	-1.46359	4.61554	COL11A1	collagen type XI alpha 1 chain
ILMN_1784626	0.0307	0.00236	3.33169	-1.46439	4.01635	CA7	carbonic anhydrase 7
ILMN_1802205	0.0223	0.00144	-3.26861	-1.46889	-1.64945	RHOB	ras homolog family member B
ILMN_1788351	0.0225	0.00145	-3.26669	-1.47455	-1.50209
ILMN_1652512	0.0225	0.00145	-3.26601	-1.47652	-0.987944	C2CD2	C2 calcium dependent domain containing 2
ILMN_1781560	0.0225	0.00145	-3.26572	-1.47737	-2.02131	ST3GAL6	ST3 beta-galactoside alpha-2,3-sialyltransferase 6
ILMN_1681520	0.0225	0.00146	-3.26688	-1.47849	-2.00404	DGAT2	diacylglycerol O-acyltransferase 2
ILMN_1811957	0.0225	0.00146	3.26556	-1.47931	0.822366	CAMSAP1	calmodulin regulated spectrin associated protein 1
ILMN_1715748	0.0226	0.00147	-3.26283	-1.48585	-2.18568	FLNC	filamin C
ILMN_1740426	0.0227	0.00147	-3.26233	-1.48732	-2.65362	RASD1	ras related dexamethasone induced 1
ILMN_1748845	0.0227	0.00148	-3.26498	-1.48875	-2.5215	NGF	nerve growth factor
ILMN_1758984	0.0227	0.00147	3.26171	-1.48915	0.86639	ZNF335	zinc finger protein 335
ILMN_1768339	0.0235	0.00156	-3.29499	-1.48954	-2.70095
ILMN_1769902	0.0227	0.00148	3.26127	-1.49338	1.46687	HSPBP1	HSPA (Hsp70) binding protein 1
ILMN_1651905	0.0229	0.00149	-3.26368	-1.49583	-1.25257
ILMN_1730937	0.0243	0.00164	3.25333	-1.50278	2.44603	SLC39A13	solute carrier family 39 member 13
ILMN_1660844	0.023	0.0015	3.25621	-1.50524	0.578566	INTS4	integrator complex subunit 4
ILMN_1755352	0.0231	0.00151	-3.26126	-1.50627	-2.62653	TUB	tubby bipartite transcription factor
ILMN_1653174	0.0352	0.00298	3.58166	-1.50637	4.81706	GCNT2	glucosaminyl (N-acetyl) transferase 2, I-branching enzyme (I blood group)
ILMN_1704376	0.023	0.0015	-3.25707	-1.50715	-2.28267	GLDN	gliomedin
ILMN_1808765	0.023	0.0015	-3.25529	-1.50793	-0.813389	ZNF25	zinc finger protein 25
ILMN_1783023	0.023	0.0015	3.25522	-1.50813	0.538524	C5orf51	chromosome 5 open reading frame 51
ILMN_1741143	0.0269	0.00193	3.18574	-1.50825	2.44089	TXK	TXK tyrosine kinase
ILMN_1664402	0.0232	0.00152	3.25983	-1.5104	1.81094	LGALS8	galectin 8
ILMN_1804789	0.0231	0.00151	3.25344	-1.51335	0.994384	CCAR2	cell cycle and apoptosis regulator 2
ILMN_1789563	0.0231	0.00151	3.2531	-1.51434	0.946285	PLCB3	phospholipase C beta 3
ILMN_1673152	0.0233	0.00153	-3.25964	-1.51448	-2.29098	NRXN1	neurexin 1
ILMN_1735124	0.0233	0.00153	-3.25593	-1.51673	-2.44343	OXT	oxytocin/neurophysin I prepropeptide
ILMN_1800468	0.0232	0.00152	-3.25322	-1.51838	-3.49959	KLKB1	kallikrein B1
ILMN_1729868	0.0233	0.00153	-3.24985	-1.52383	-1.67362	SPRYD4	SPRY domain containing 4
ILMN_1688242	0.0233	0.00153	-3.24985	-1.52528	-3.56968	C6	complement component 6
ILMN_1793831	0.0233	0.00154	3.24828	-1.52841	1.52286	TRADD	TNFRSF1A associated via death domain
ILMN_1764127	0.0246	0.00167	3.23572	-1.52902	2.26676	NPHP1	nephrocystin 1
ILMN_1695290	0.0234	0.00154	-3.2476	-1.53041	-1.16107	FERMT2	fermitin family member 2
ILMN_1684629	0.0244	0.00165	3.22617	-1.53149	1.58558	CFAP61	cilia and flagella associated protein 61
ILMN_1680424	0.0234	0.00155	-3.24839	-1.53248	-2.84453	CTSG	cathepsin G
ILMN_1769201	0.0234	0.00154	3.24681	-1.5327	1.52575	ELF3	E74 like ETS transcription factor 3
ILMN_1691476	0.0235	0.00155	-3.24471	-1.53884	-1.73162	MYLK	myosin light chain kinase
ILMN_1722858	0.0237	0.00157	3.24156	-1.54802	0.475479	PPP2CA	protein phosphatase 2 catalytic subunit alpha
ILMN_1718558	0.0238	0.00157	3.24133	-1.5501	0.993762	PARP12	poly(ADP-ribose) polymerase family member 12
ILMN_1655718	0.0262	0.00185	-3.33508	-1.55161	-2.87897	NKAIN2	Na+/K+ transporting ATPase interacting 2
ILMN_1764721	0.0238	0.00158	3.24031	-1.55168	0.667372	RPL8	ribosomal protein L8
ILMN_1726809	0.0238	0.00158	3.24203	-1.55247	2.01941	BHLHE41	basic helix-loop-helix family member e41
ILMN_1809590	0.0238	0.00158	3.23971	-1.55342	1.84021	GINS2	GINS complex subunit 2
ILMN_1756022	0.0263	0.00186	3.20162	-1.55473	2.27023	HIST1H2AM	histone cluster 1, H2am
ILMN_1784217	0.024	0.0016	-3.2451	-1.55482	-2.74695	SOX15	SRY-box 15
ILMN_1704654	0.0238	0.00158	-3.23921	-1.55487	-1.13654	KAT2B	lysine acetyltransferase 2B
ILMN_1735779	0.0238	0.00158	-3.23945	-1.55559	-1.99146	KCNJ8	potassium voltage-gated channel subfamily J member 8
ILMN_1745420	0.0249	0.00171	3.22057	-1.5567	2.16313	PHF19	PHD finger protein 19
ILMN_1811598	0.024	0.0016	-3.24062	-1.55964	-4.03435	ADH1B	alcohol dehydrogenase 1B (class I), beta polypeptide
ILMN_1722332	0.0239	0.00159	-3.23794	-1.55998	-3.37845	CCL16	C-C motif chemokine ligand 16
ILMN_1797082	0.024	0.0016	3.23642	-1.56299	0.581754	SNX13	sorting nexin 13
ILMN_1806037	0.024	0.0016	3.23603	-1.56413	2.11097	TK1	thymidine kinase 1
ILMN_1693367	0.0241	0.00161	3.23657	-1.56834	1.86926	TPD52	tumor protein D52
ILMN_1766411	0.0241	0.00161	-3.23412	-1.5697	-1.20631	AP1S2	adaptor related protein complex 1 sigma 2 subunit
ILMN_1792301	0.0287	0.00213	3.18638	-1.57207	2.98241	LAMB4	laminin subunit beta 4
ILMN_1657803	0.0241	0.00161	-3.23309	-1.57268	-1.80669	CFH	complement factor H
ILMN_1725300	0.0241	0.00161	3.23291	-1.57321	0.975253
ILMN_1688515	0.0241	0.00161	3.23262	-1.57404	0.941526	ZNF195	zinc finger protein 195
ILMN_1791093	0.0241	0.00162	3.23246	-1.57454	0.570933	PPHLN1	periphilin 1
ILMN_1804854	0.0241	0.00162	3.23166	-1.57686	0.682684	CTNNA1	catenin alpha 1
ILMN_1751793	0.0283	0.00208	3.15986	-1.57842	2.62074
ILMN_1778486	0.0242	0.00163	3.23273	-1.57947	1.28285	TRPM7	transient receptor potential cation channel subfamily M member 7
ILMN_1666733	0.0242	0.00163	3.22985	-1.58212	2.79679	CXCL8	C-X-C motif chemokine ligand 8
ILMN_1699471	0.0242	0.00163	3.2298	-1.58225	1.24169	LIN9	lin-9 DREAM MuvB core complex component
ILMN_1812403	0.0242	0.00163	3.22963	-1.58274	0.855517	BCAP31	B-cell receptor-associated protein 31
ILMN_1813374	0.0243	0.00164	3.22852	-1.58597	1.01832	MFSD12	major facilitator superfamily domain containing 12
ILMN_1703886	0.0243	0.00164	-3.22931	-1.58648	-1.45068	SLC16A2	solute carrier family 16 member 2
ILMN_1737523	0.0325	0.0026	3.17692	-1.58733	6.39927	PCDHGA1	protocadherin gamma subfamily A, 1
ILMN_1704294	0.0307	0.00236	3.13182	-1.58818	6.86812	CDH3	cadherin 3
ILMN_1807902	0.0243	0.00164	3.22747	-1.58903	0.995078	MAD1L1	MAD1 mitotic arrest deficient like 1
ILMN_1744604	0.0243	0.00164	3.22712	-1.59004	1.37183	CYBA	cytochrome b-245 alpha chain
ILMN_1789999	0.0243	0.00165	3.22629	-1.59244	0.658623	SLC30A7	solute carrier family 30 member 7
ILMN_1788213	0.0243	0.00165	3.22625	-1.59255	0.945485	FRAT2	frequently rearranged in advanced T-cell lymphomas 2
ILMN_1653894	0.0243	0.00165	3.22614	-1.59289	1.07907	GMIP	GEM interacting protein
ILMN_1707084	0.0243	0.00165	-3.22612	-1.59294	-0.686277	UBE2D4	ubiquitin conjugating enzyme E2 D4 (putative)
ILMN_1728972	0.0318	0.0025	3.10086	-1.59434	5.39422	FAM64A	family with sequence similarity 64 member A
ILMN_1766634	0.0246	0.00167	3.23078	-1.59615	1.82705	MCM6	minichromosome maintenance complex component 6
ILMN_1804213	0.0257	0.00179	3.20854	-1.59764	1.61032
ILMN_1673871	0.0245	0.00166	3.22346	-1.60067	2.23777	EPCAM	epithelial cell adhesion molecule
ILMN_1768101	0.0245	0.00167	3.22284	-1.60246	1.79446	HOXB6	homeobox B6
ILMN_1767474	0.0253	0.00176	-3.25429	-1.60346	-3.78965	HAO2	hydroxyacid oxidase 2
ILMN_1775537	0.0246	0.00167	3.22364	-1.60436	1.60226	TRIM69	tripartite motif containing 69
ILMN_1810436	0.0246	0.00167	-3.22198	-1.60496	-0.856808	DNAJC27	DnaJ heat shock protein family (Hsp40) member C27
ILMN_1658624	0.0246	0.00167	3.22141	-1.60662	0.593302	UBXN6	UBX domain protein 6
ILMN_1797005	0.0246	0.00168	3.22115	-1.60736	0.822518	PGLS	6-phosphogluconolactonase
ILMN_1719307	0.0261	0.00182	3.20499	-1.61117	2.34393	ECT2	epithelial cell transforming 2
ILMN_1746788	0.0249	0.0017	3.22405	-1.61228	1.85892	TRIM10	tripartite motif containing 10
ILMN_1801476	0.0247	0.00169	3.21872	-1.6144	1.93923	CDS1	CDP-diacylglycerol synthase 1
ILMN_1706553	0.0248	0.00169	3.21849	-1.61644	0.955191
ILMN_1674588	0.0249	0.0017	-3.21979	-1.61841	-3.69375	HAO1	hydroxyacid oxidase 1
ILMN_1724315	0.0249	0.0017	3.21664	-1.62045	1.43389	LMTK2	lemur tyrosine kinase 2
ILMN_1717313	0.0249	0.0017	3.21638	-1.62119	0.964168	NFKBIE	NFKB inhibitor epsilon
ILMN_1721978	0.0249	0.0017	3.21601	-1.62227	2.23441	CARD11	caspase recruitment domain family member 11
ILMN_1672526	0.0285	0.00212	3.21509	-1.62315	2.47343	LOC389834	ankyrin repeat domain 57 pseudogene
ILMN_1732040	0.0348	0.00293	3.30936	-1.62316	4.22368	GTF2A1	general transcription factor IIA subunit 1
ILMN_1656300	0.0249	0.00171	-3.21662	-1.62466	-2.18868	GFRA2	GDNF family receptor alpha 2
ILMN_1804137	0.0249	0.00171	-3.21504	-1.62508	-1.35908	ATP11C	ATPase phospholipid transporting 11C
ILMN_1731889	0.0249	0.00171	-3.2148	-1.62576	-0.727215	ZFYVE21	zinc finger FYVE-type containing 21
ILMN_1739942	0.0249	0.00171	3.21382	-1.62861	1.28335	FAM117B	family with sequence similarity 117 member B
ILMN_1669281	0.025	0.00172	3.21229	-1.63303	0.858214	CLN3	CLN3, battenin
ILMN_1715401	0.025	0.00172	-3.21214	-1.63345	-3.5785	MT1G	metallothionein 1G
ILMN_1671452	0.025	0.00173	3.21194	-1.63404	0.657123	MRPL44	mitochondrial ribosomal protein L44
ILMN_1677893	0.025	0.00173	-3.21166	-1.63484	-1.5115	ADCY4	adenylate cyclase 4
ILMN_1663399	0.0251	0.00174	-3.21397	-1.63669	-1.91535	TIMP4	TIMP metallopeptidase inhibitor 4
ILMN_1754051	0.0251	0.00173	3.21243	-1.63676	1.43042	RMI1	RecQ mediated genome instability 1
ILMN_1775373	0.0251	0.00174	-3.21268	-1.63746	-1.99265	CMTM5	CKLF like MARVEL transmembrane domain containing 5
ILMN_1676874	0.0251	0.00174	3.20938	-1.64145	0.930685	BCL10	B-cell CLL/lymphoma 10
ILMN_1742444	0.0253	0.00175	-3.21177	-1.64302	-4.10112	UGT2B10	UDP glucuronosyltransferase family 2 member B10
ILMN_1678695	0.0264	0.00187	-3.24921	-1.64347	-2.44163	RBBP8	RB binding protein 8, endonuclease
ILMN_1743475	0.0252	0.00175	-3.20885	-1.64432	-3.94378	PIPOX	pipecolic acid and sarcosine oxidase
ILMN_1725808	0.0356	0.00304	3.29467	-1.64914	4.16198	GABRG3	gamma-aminobutyric acid type A receptor gamma3 subunit
ILMN_1769883	0.0253	0.00175	3.20663	-1.64939	0.876893	IDE	insulin degrading enzyme
ILMN_1721258	0.0254	0.00176	3.20886	-1.64993	1.82444	MBNL2	muscleblind like splicing regulator 2
ILMN_1684520	0.0253	0.00176	3.20717	-1.65054	1.27396	TSTD2	thiosulfate sulfurtransferase like domain containing 2
ILMN_1767260	0.0253	0.00176	3.20618	-1.6507	1.55262	CCDC138	coiled-coil domain containing 138
ILMN_1733311	0.0254	0.00177	3.20412	-1.65665	0.710698	PIGB	phosphatidylinositol glycan anchor biosynthesis class B
ILMN_1771964	0.0257	0.00179	-3.20077	-1.66631	-1.01077	GSTA4	glutathione S-transferase alpha 4
ILMN_1707553	0.0257	0.00179	3.19982	-1.66904	1.30214	GAREM1	GRB2 associated regulator of MAPK1 subtype 1
ILMN_1713952	0.0258	0.0018	3.19856	-1.6727	2.17754	C1orf106	chromosome 1 open reading frame 106
ILMN_1694293	0.027	0.00194	3.18048	-1.67272	3.93018
ILMN_1800844	0.0259	0.00181	3.19662	-1.67828	0.7375	ARPC5L	actin related protein 2/3 complex subunit 5 like
ILMN_1689336	0.0261	0.00183	3.19558	-1.68394	2.51273	HOXA10	homeobox A10
ILMN_1810805	0.0261	0.00182	3.19432	-1.6849	0.691776	HEATR5B	HEAT repeat containing 5B
ILMN_1765493	0.0261	0.00183	3.1947	-1.68512	0.949997	SHKBP1	SH3KBP1 binding protein 1
ILMN_1768399	0.0261	0.00184	3.19527	-1.68758	1.47446	ARFIP1	ADP ribosylation factor interacting protein 1
ILMN_1659947	0.0261	0.00183	-3.19383	-1.68764	-4.1487	FGA	fibrinogen alpha chain
ILMN_1688785	0.0265	0.00187	-3.20215	-1.69221	-2.61852	KCNMA1	potassium calcium-activated channel subfamily M alpha 1
ILMN_1672659	0.0262	0.00185	3.19293	-1.69292	1.35906	RAB27B	RAB27B, member RAS oncogene family
ILMN_1680683	0.0262	0.00184	3.1918	-1.69347	1.27731	BCR	BCR, RhoGEF and GTPase activating protein
ILMN_1723035	0.0262	0.00185	3.1914	-1.69463	2.28583	OLR1	oxidized low density lipoprotein receptor 1
ILMN_1805799	0.0268	0.00192	-3.21058	-1.6965	-4.50771	CFHR3	complement factor H related 3
ILMN_1788774	0.0305	0.00232	-3.31861	-1.69692	-3.18116	TYR	tyrosinase
ILMN_1739234	0.0263	0.00186	3.18834	-1.70212	0.992777	TP53BP1	tumor protein p53 binding protein 1
ILMN_1804478	0.0301	0.00228	3.17586	-1.70391	2.92175	DSP	desmoplakin
ILMN_1763012	0.0264	0.00186	3.18768	-1.704	0.871101	PFN1	profilin 1
ILMN_1692770	0.0264	0.00186	3.1874	-1.70481	0.577901
ILMN_1658095	0.0264	0.00187	-3.18638	-1.70775	-1.73068	CYR61	cysteine rich angiogenic inducer 61
ILMN_1718525	0.0265	0.00187	-3.18582	-1.70935	-2.45451	ITIH4	inter-alpha-trypsin inhibitor heavy chain family member 4
ILMN_1653613	0.0265	0.00188	3.18534	-1.71203	0.859465	PIGO	phosphatidylinositol glycan anchor biosynthesis class O
ILMN_1798620	0.0265	0.00188	-3.18423	-1.71391	-0.899855	PQLC1	PQ loop repeat containing 1
ILMN_1675597	0.027	0.00194	-3.19916	-1.7147	-4.94347	SLC22A1	solute carrier family 22 member 1
ILMN_1783008	0.0266	0.00189	-3.18573	-1.71495	-4.2393	HFE2	hemochromatosis type 2 (juvenile)
ILMN_1740402	0.0269	0.00192	-3.19067	-1.71771	-4.05086	HAO2	hydroxyacid oxidase 2
ILMN_1730433	0.0267	0.00189	3.18304	-1.71865	1.42127	CD2AP	CD2 associated protein
ILMN_1808634	0.0267	0.0019	3.1823	-1.71947	0.974534	DRAM2	DNA damage regulated autophagy modulator 2
ILMN_1784771	0.0267	0.0019	-3.18188	-1.72197	-1.04738	KLHL21	kelch like family member 21
ILMN_1796913	0.0275	0.00201	-3.21254	-1.72246	-2.23765	TMEM35A	transmembrane protein 35A
ILMN_1694985	0.027	0.00193	3.19082	-1.72253	2.41852	AKR1E2	aldo-keto reductase family 1 member E2
ILMN_1740418	0.0268	0.00192	3.18331	-1.72469	2.07738	CYP27B1	cytochrome P450 family 27 subfamily B member 1
ILMN_1671054	0.0268	0.00191	3.18029	-1.72524	0.959907	HLA-A	major histocompatibility complex, class I, A
ILMN_1757867	0.0273	0.00197	-3.19791	-1.72717	-2.77159
ILMN_1748384	0.0268	0.00191	-3.17944	-1.72767	-2.33694	BOC	BOC cell adhesion associated, oncogene regulated
ILMN_1754137	0.0269	0.00192	-3.18124	-1.72782	-4.51022	CFHR1	complement factor H related 1
ILMN_1734240	0.0268	0.00192	3.17899	-1.72896	0.77607	KLHL25	kelch like family member 25
ILMN_1686109	0.0269	0.00193	-3.18185	-1.7303	-3.44708	CCL23	C-C motif chemokine ligand 23
ILMN_1731948	0.0269	0.00193	-3.18159	-1.73103	-4.19628	PCK1	phosphoenolpyruvate carboxykinase 1
ILMN_1803348	0.0269	0.00192	-3.17781	-1.73233	-0.957467	EHBP1	EH domain binding protein 1
ILMN_1651666	0.0273	0.00198	-3.19143	-1.73644	-2.66986
ILMN_1772690	0.027	0.00194	3.17616	-1.73837	0.620158	OGFOD1	2-oxoglutarate and iron dependent oxygenase domain containing 1
ILMN_1745038	0.0319	0.00252	3.10783	-1.74008	2.97159	TAS2R4	taste 2 receptor member 4
ILMN_1812031	0.0271	0.00195	-3.17397	-1.74335	-1.29483	PALM	paralemmin
ILMN_1768279	0.0271	0.00195	3.17345	-1.74484	1.0373	NME6	NME/NM23 nucleoside diphosphate kinase 6
ILMN_1695640	0.0284	0.00209	3.15188	-1.74533	1.7197	PTPN22	protein tyrosine phosphatase, non-receptor type 22
ILMN_1789849	0.0272	0.00196	-3.17343	-1.74746	-1.31487	NOL9	nucleolar protein 9
ILMN_1685000	0.0272	0.00195	3.17249	-1.74761	2.66476
ILMN_1738866	0.0272	0.00196	-3.17213	-1.74863	-0.800557	DEXI	Dexi homolog
ILMN_1806924	0.0272	0.00197	-3.17356	-1.74977	-2.57177	PHYHD1	phytanoyl-CoA dioxygenase domain containing 1
ILMN_1808783	0.0272	0.00196	3.17155	-1.75028	0.899045	STRBP	spermatid perinuclear RNA binding protein
ILMN_1676548	0.0272	0.00196	3.17086	-1.75227	0.997478	BZW2	basic leucine zipper and W2 domains 2
ILMN_1660815	0.0301	0.00228	-3.19706	-1.7524	-2.14112	CAB39L	calcium binding protein 39 like
ILMN_1742410	0.0272	0.00197	3.17045	-1.75344	1.5149	BCL2L1	BCL2 like 1
ILMN_1804528	0.0273	0.00197	-3.16988	-1.75505	-0.660806	MTFR1L	mitochondrial fission regulator 1 like
ILMN_1720945	0.0273	0.00197	3.17001	-1.75596	1.82839	SMYD2	SET and MYND domain containing 2
ILMN_1683609	0.0273	0.00197	3.16953	-1.75606	0.957574	UBA1	ubiquitin like modifier activating enzyme 1
ILMN_1770356	0.0273	0.00198	3.16856	-1.75883	0.74111	POLRMT	RNA polymerase mitochondrial
ILMN_1656368	0.0273	0.00198	-3.16808	-1.7602	-2.47107	ALDH4A1	aldehyde dehydrogenase 4 family member A1
ILMN_1671875	0.0274	0.00199	-3.16909	-1.76119	-2.17057	CLIC4	chloride intracellular channel 4
ILMN_1705397	0.0273	0.00199	-3.16752	-1.76181	-0.908201	PDK2	pyruvate dehydrogenase kinase 2
ILMN_1749362	0.0373	0.00328	3.1271	-1.76219	6.04586	CD28	CD28 molecule
ILMN_1771651	0.0274	0.00199	3.16656	-1.76457	0.76813	MON1B	MON1 homolog B, secretory trafficking associated
ILMN_1719190	0.029	0.00216	3.1489	-1.76497	1.80061	CCDC9	coiled-coil domain containing 9
ILMN_1731062	0.0318	0.00249	-3.29064	-1.76504	-4.04745	NPY	neuropeptide Y
ILMN_1763387	0.0274	0.00199	3.16622	-1.76552	0.931233	ATP6V1H	ATPase H+ transporting V1 subunit H
ILMN_1698354	0.0275	0.002	3.16464	-1.77005	1.37191	PDDC1	Parkinson disease 7 domain containing 1
ILMN_1754864	0.0275	0.00201	-3.1664	-1.77019	-3.7926	SLC25A18	solute carrier family 25 member 18
ILMN_1809311	0.0276	0.00202	-3.16905	-1.77116	-5.07941	APOF	apolipoprotein F
ILMN_1806275	0.0275	0.00201	3.16462	-1.77138	1.27201	ADAT3	adenosine deaminase, tRNA specific 3
ILMN_1730925	0.0278	0.00204	3.17261	-1.77228	2.68085	EDN2	endothelin 2
ILMN_1774717	0.0275	0.00201	3.16378	-1.77251	2.31652	PMEPA1	prostate transmembrane protein, androgen induced 1
ILMN_1675331	0.0276	0.00202	-3.16443	-1.77449	-1.99308	PEG3	paternally expressed 3
ILMN_1691843	0.0276	0.00201	3.16297	-1.77481	0.670705	RNPS1	RNA binding protein with serine rich domain 1
ILMN_1708304	0.0276	0.00202	-3.16289	-1.77629	-0.774194	C11orf16	chromosome 11 open reading frame 16
ILMN_1679324	0.0276	0.00202	-3.16231	-1.7767	-0.92918	EIF1B	eukaryotic translation initiation factor 1B
ILMN_1799153	0.0276	0.00202	3.1623	-1.77673	0.754924	STK38	serine/threonine kinase 38
ILMN_1669572	0.0276	0.00202	3.16267	-1.77694	0.785139	RNF126	ring finger protein 126
ILMN_1720526	0.0276	0.00202	3.16189	-1.77791	1.33635	CENPN	centromere protein N
ILMN_1721136	0.0277	0.00203	-3.15975	-1.78403	-1.67778	H6PD	hexose-6-phosphate dehydrogenase/glucose 1-dehydrogenase
ILMN_1754055	0.028	0.00206	-3.16388	-1.78733	-4.70245	APOA5	apolipoprotein A5
ILMN_1762735	0.0283	0.00209	-3.17113	-1.78737	-3.6775	EVC2	EvC ciliary complex subunit 2
ILMN_1707273	0.0363	0.00313	3.10494	-1.78748	3.40358	KRTAP10-2	keratin associated protein 10-2
ILMN_1752758	0.0278	0.00204	3.15839	-1.78788	1.359	BTN2A2	butyrophilin subfamily 2 member A2
ILMN_1777263	0.0294	0.0022	-3.1886	-1.79806	-3.44486	MEOX2	mesenchyme homeobox 2
ILMN_1676897	0.0283	0.00209	-3.15188	-1.80647	-1.70513	HSPA12B	heat shock protein family A (Hsp70) member 12B
ILMN_1698834	0.0283	0.00209	3.15168	-1.80703	1.44275	AMDHD2	amidohydrolase domain containing 2
ILMN_1776109	0.0283	0.00209	3.15137	-1.8079	0.617333	ZNF622	zinc finger protein 622
ILMN_1772910	0.0284	0.0021	-3.15246	-1.80857	-2.47871	GAS1	growth arrest specific 1
ILMN_1672443	0.0284	0.0021	-3.15002	-1.81176	-1.15451	QDPR	quinoid dihydropteridine reductase
ILMN_1700782	0.0285	0.00211	-3.15064	-1.81373	-4.29323	TTR	transthyretin
ILMN_1712221	0.0285	0.00211	3.14877	-1.8153	0.836812	LCMT1	leucine carboxyl methyltransferase 1
ILMN_1752755	0.0285	0.00211	-3.14758	-1.81869	-2.20701	VWF	von Willebrand factor
ILMN_1805483	0.0323	0.00258	3.128	-1.81891	2.64099	ABHD16B	abhydrolase domain containing 16B
ILMN_1797130	0.0385	0.00347	3.06776	-1.82527	6.27309	ADGRB1	adhesion G protein-coupled receptor B1
ILMN_1796106	0.0287	0.00213	3.14491	-1.82628	0.991543	MGAT4B	mannosyl (alpha-1,3-)-glycoprotein beta-1,4-N-acetylglucosaminyltransferase, isozyme B
ILMN_1806907	0.0287	0.00213	3.14462	-1.82711	0.906387	PAWR	pro-apoptotic WT1 regulator
ILMN_1723358	0.029	0.00216	-3.14997	-1.82813	-2.3167	SCARA3	scavenger receptor class A member 3
ILMN_1749244	0.0288	0.00214	-3.14393	-1.82907	-0.788418	LYRM1	LYR motif containing 1
ILMN_1732066	0.0293	0.00219	3.15655	-1.8301	3.29743	CKMT1A	creatine kinase, mitochondrial 1A
ILMN_1769129	0.0288	0.00215	-3.14426	-1.8306	-3.33471	CCL19	C-C motif chemokine ligand 19
ILMN_1731729	0.0364	0.00315	3.0448	-1.8328	3.82472	OCLN	occludin
ILMN_1676192	0.029	0.00216	-3.14303	-1.83535	-4.48769	SLC13A5	solute carrier family 13 member 5
ILMN_1695773	0.0321	0.00255	3.09785	-1.83984	1.92328	STK24	serine/threonine kinase 24
ILMN_1704713	0.0291	0.00217	3.13933	-1.84333	0.892153	CSNK1G1	casein kinase 1 gamma 1
ILMN_1653009	0.0371	0.00326	3.0585	-1.84524	3.31803	RGS12	regulator of G-protein signaling 12
ILMN_1653646	0.0307	0.00235	3.11897	-1.84595	1.67384	UBL7	ubiquitin like 7
ILMN_1740770	0.0341	0.00284	3.06768	-1.84634	2.74683	GON4L	gon-4 like
ILMN_1761058	0.0292	0.00218	-3.13784	-1.84637	-1.65182	ACAD11	acyl-CoA dehydrogenase family member 11
ILMN_1687841	0.0293	0.0022	-3.13972	-1.84859	-3.30053	SCGN	secretagogin, EF-hand calcium binding protein
ILMN_1792489	0.0293	0.00219	3.13656	-1.84999	0.645556	ARPC2	actin related protein 2/3 complex subunit 2
ILMN_1727589	0.0322	0.00257	3.09017	-1.85082	2.97338	SULT2B1	sulfotransferase family 2B member 1
ILMN_1704972	0.0293	0.00219	3.13589	-1.8519	1.13935	TRIM5	tripartite motif containing 5
ILMN_1813517	0.0297	0.00223	3.14426	-1.85205	1.78898	DISP2	dispatched RND transporter family member 2
ILMN_1671808	0.0313	0.00243	-3.12813	-1.85669	-2.81755
ILMN_1801616	0.0294	0.00221	-3.13381	-1.85779	-1.75496	EMP1	epithelial membrane protein 1
ILMN_1678863	0.0295	0.00221	3.13306	-1.85993	1.17001	ZBED6CL	ZBED6 C-terminal like
ILMN_1763739	0.0296	0.00222	3.13265	-1.86227	1.4164	CAPN15	calpain 15
ILMN_1805062	0.0325	0.0026	3.08499	-1.86375	2.37343	OR51V1	olfactory receptor family 51 subfamily V member 1
ILMN_1727135	0.0325	0.0026	3.08355	-1.86514	2.18032	FIBCD1	fibrinogen C domain containing 1
ILMN_1724145	0.0298	0.00224	3.12962	-1.86968	1.01975	CBX4	chromobox 4
ILMN_1681503	0.0298	0.00224	3.12982	-1.87029	1.54732	MCM2	minichromosome maintenance complex component 2
ILMN_1698313	0.0353	0.00299	3.07436	-1.87248	2.14198	CPM	carboxypeptidase M
ILMN_1697998	0.0328	0.00265	3.08488	-1.87388	2.20672	MTFR2	mitochondrial fission regulator 2
ILMN_1734794	0.0301	0.00228	3.13446	-1.87633	2.24577	AKAP4	A-kinase anchoring protein 4
ILMN_1793888	0.0313	0.00244	3.10495	-1.87985	4.65754	SERPINB5	serpin family B member 5
ILMN_1706690	0.0301	0.00227	-3.12617	-1.8818	-2.57695	KHK	ketohexokinase
ILMN_1814924	0.0307	0.00236	-3.14632	-1.88217	-2.04058	NXPE3	neurexophilin and PC-esterase domain family member 3
ILMN_1689485	0.0301	0.00227	3.12514	-1.88234	0.731482	ZNF148	zinc finger protein 148
ILMN_1681221	0.0329	0.00267	3.08146	-1.88324	2.80839	ARHGEF39	Rho guanine nucleotide exchange factor 39
ILMN_1767113	0.0301	0.00228	-3.12614	-1.88436	-3.79162	AOX1	aldehyde oxidase 1
ILMN_1669113	0.0301	0.00227	-3.12415	-1.88514	-1.94426	ATF5	activating transcription factor 5
ILMN_1748383	0.0306	0.00233	-3.13672	-1.88536	-2.02146	OSR1	odd-skipped related transciption factor 1
ILMN_1705433	0.0301	0.00228	3.12404	-1.88545	1.15274	CBLL1	Cbl proto-oncogene like 1
ILMN_1743402	0.0314	0.00245	3.10334	-1.8856	2.99214	SIX4	SIX homeobox 4
ILMN_1815619	0.0376	0.00334	3.02	-1.88628	5.27088	CDX1	caudal type homeobox 1
ILMN_1720080	0.0301	0.00228	-3.12397	-1.88684	-1.19127	KLF10	Kruppel like factor 10
ILMN_1658494	0.0301	0.00228	-3.12341	-1.88723	-1.25638	RGCC	regulator of cell cycle
ILMN_1696627	0.0301	0.00228	-3.1234	-1.88726	-1.63604	LHFP	lipoma HMGIC fusion partner
ILMN_1776708	0.0301	0.00228	3.12325	-1.88768	1.15715	LIMK1	LIM domain kinase 1
ILMN_1668713	0.0331	0.00269	3.07744	-1.89134	2.589	GABPB2	GA binding protein transcription factor beta subunit 2
ILMN_1731353	0.0302	0.00229	3.12188	-1.89155	1.35609	CHPF	chondroitin polymerizing factor
ILMN_1683700	0.0302	0.00229	-3.12187	-1.89159	-1.02557	TNFSF12	tumor necrosis factor superfamily member 12
ILMN_1658175	0.0354	0.003	3.05305	-1.89253	2.96535
ILMN_1719906	0.0303	0.0023	-3.12115	-1.89361	-0.991513	HADH	hydroxyacyl-CoA dehydrogenase
ILMN_1770149	0.0319	0.00252	-3.10932	-1.89473	-1.7793	AKAP12	A-kinase anchoring protein 12
ILMN_1766797	0.0303	0.0023	-3.12064	-1.89507	-0.880172	CCS	copper chaperone for superoxide dismutase
ILMN_1744534	0.0303	0.0023	-3.12017	-1.89638	-1.06019	LYRM5	LYR motif containing 5
ILMN_1693086	0.0383	0.00345	3.03217	-1.89846	3.3924
ILMN_1813795	0.0306	0.00233	3.12241	-1.90139	1.69202	RASSF5	Ras association domain family member 5
ILMN_1693107	0.0318	0.00251	3.09986	-1.90196	1.76791	MLH3	mutL homolog 3
ILMN_1754179	0.0305	0.00232	3.11743	-1.90413	1.26731	AP1G2	adaptor related protein complex 1 gamma 2 subunit
ILMN_1738921	0.0305	0.00232	-3.11733	-1.90442	-1.44744	ACAA1	acetyl-CoA acyltransferase 1
ILMN_1768031	0.0306	0.00233	3.11664	-1.90634	0.810887	DEDD2	death effector domain containing 2
ILMN_1781400	0.0306	0.00233	-3.1165	-1.90791	-2.6907	SLC7A2	solute carrier family 7 member 2
ILMN_1779800	0.0308	0.00237	-3.12294	-1.90855	-2.12151	MARK1	microtubule affinity regulating kinase 1
ILMN_1709237	0.0306	0.00234	-3.1162	-1.90876	-2.18703	EPHX2	epoxide hydrolase 2
ILMN_1741540	0.0306	0.00234	3.11505	-1.91082	0.757765	TBC1D22A	TBC1 domain family member 22A
ILMN_1720606	0.0306	0.00234	-3.11471	-1.91181	-1.38334	LRCH2	leucine rich repeats and calponin homology domain containing 2
ILMN_1695157	0.0307	0.00236	-3.1172	-1.91206	-2.59382	CA4	carbonic anhydrase 4
ILMN_1703408	0.0308	0.00237	-3.1186	-1.91345	-1.82348	FZD3	frizzled class receptor 3
ILMN_1711899	0.0307	0.00236	3.11254	-1.9179	1.51979	ANXA2	annexin A2
ILMN_1801101	0.0307	0.00236	-3.11247	-1.91812	-0.861857	ZBTB48	zinc finger and BTB domain containing 48
ILMN_1738414	0.0311	0.0024	-3.12113	-1.91831	-3.99505	G6PC	glucose-6-phosphatase catalytic subunit
ILMN_1678690	0.0308	0.00237	-3.11209	-1.92035	-4.19757	UPB1	beta-ureidopropionase 1
ILMN_1679428	0.0309	0.00238	3.10995	-1.92521	0.723492	CHIC2	cysteine rich hydrophobic domain 2
ILMN_1796685	0.0385	0.00349	3.00323	-1.92566	3.34953	BEST4	bestrophin 4
ILMN_1659659	0.0309	0.00238	-3.10951	-1.92645	-1.20955	MAGEH1	MAGE family member H1
ILMN_1766560	0.0322	0.00257	3.08649	-1.92886	1.18501	ANKHD1-EIF4EBP3	ANKHD1-EIF4EBP3 readthrough
ILMN_1778500	0.031	0.00239	-3.10834	-1.92974	-1.42996	ETFDH	electron transfer flavoprotein dehydrogenase
ILMN_1703576	0.031	0.00239	3.10823	-1.93004	1.19752	MYO10	myosin X
ILMN_1784870	0.0311	0.00241	-3.10931	-1.93296	-1.43403	CES5A	carboxylesterase 5A
ILMN_1713901	0.0311	0.0024	3.10717	-1.93304	1.28368	KDELR3	KDEL endoplasmic reticulum protein retention receptor 3
ILMN_1693559	0.0313	0.00243	3.11156	-1.93455	1.63053	DOT1L	DOT1 like histone lysine methyltransferase
ILMN_1789283	0.0311	0.0024	3.10663	-1.93456	0.72365
ILMN_1791052	0.0311	0.00241	3.10665	-1.93563	1.13624	FKBPL	FK506 binding protein like
ILMN_1655215	0.0312	0.00241	3.10546	-1.93785	0.945995	PGGT1B	protein geranylgeranyltransferase type I subunit beta
ILMN_1809653	0.0312	0.00242	3.10541	-1.93914	2.44697	ASPHD2	aspartate beta-hydroxylase domain containing 2
ILMN_1793549	0.0312	0.00242	3.10453	-1.94046	0.743319	PTPN4	protein tyrosine phosphatase, non-receptor type 4
ILMN_1746561	0.0312	0.00242	-3.10389	-1.94226	-0.800853	BCL2L2	BCL2 like 2
ILMN_1668345	0.0313	0.00243	-3.10316	-1.94433	-1.38676	OAF	out at first homolog
ILMN_1794594	0.0314	0.00244	-3.10245	-1.94745	-1.52685	RASGRP2	RAS guanyl releasing protein 2
ILMN_1770128	0.0314	0.00244	-3.10151	-1.94895	-2.43711	FAM150B	family with sequence similarity 150 member B
ILMN_1662470	0.0314	0.00244	3.10143	-1.94919	1.44235	C10orf35	chromosome 10 open reading frame 35
ILMN_1657750	0.0314	0.00245	3.10259	-1.94939	2.24455	CNNM1	cyclin and CBS domain divalent metal cation transport mediator 1
ILMN_1810680	0.0314	0.00245	3.10062	-1.95145	1.16278
ILMN_1753122	0.0314	0.00245	3.10074	-1.95226	0.837077	MCPH1	microcephalin 1
ILMN_1740396	0.0327	0.00264	3.0783	-1.9528	1.11525	SYNRG	synergin, gamma
ILMN_1788239	0.0314	0.00246	-3.10095	-1.95281	-3.22479	AMDHD1	amidohydrolase domain containing 1
ILMN_1755251	0.0315	0.00247	-3.10238	-1.95362	-4.19844	ITIH1	inter-alpha-trypsin inhibitor heavy chain 1
ILMN_1692895	0.0315	0.00246	-3.10142	-1.95388	-2.07094	PIK3R3	phosphoinositide-3-kinase regulatory subunit 3
ILMN_1811082	0.0375	0.00332	3.05092	-1.95419	3.03016	C11orf1	chromosome 11 open reading frame 1
ILMN_1788122	0.0321	0.00255	-3.11699	-1.9558	-4.0968	GSTA5	glutathione S-transferase alpha 5
ILMN_1670895	0.0316	0.00247	3.09756	-1.96004	0.514847	ZNF207	zinc finger protein 207
ILMN_1769032	0.0318	0.0025	-3.10056	-1.96257	-2.82993	GLYATL1	glycine-N-acyltransferase like 1
ILMN_1781897	0.0476	0.00481	3.26813	-1.96259	3.45309	KLRC3	killer cell lectin like receptor C3
ILMN_1805737	0.0317	0.00248	3.09633	-1.96351	1.85147	PFKP	phosphofructokinase, platelet
ILMN_1709635	0.0317	0.00248	-3.09591	-1.96468	-1.83728	SLC38A11	solute carrier family 38 member 11
ILMN_1754635	0.0317	0.00248	3.0959	-1.9647	1.29212	CRB3	crumbs 3, cell polarity complex component
ILMN_1796642	0.0318	0.00249	3.09494	-1.96739	1.66956	NCF2	neutrophil cytosolic factor 2
ILMN_1711189	0.0318	0.00249	3.09512	-1.96803	0.571852	EXOSC10	exosome component 10
ILMN_1670453	0.0324	0.00259	-3.11179	-1.97004	-2.64746
ILMN_1780349	0.0318	0.00251	-3.09631	-1.97061	-4.04161	PRG4	proteoglycan 4
ILMN_1666618	0.0318	0.0025	3.09357	-1.97125	0.797204	RHNO1	RAD9-HUS1-RAD1 interacting nuclear orphan 1
ILMN_1718963	0.0318	0.00251	3.09377	-1.97181	0.77321	HARS2	histidyl-tRNA synthetase 2, mitochondrial
ILMN_1757186	0.0318	0.00251	-3.0933	-1.97313	-1.43126	GIMAP1	GTPase, IMAP family member 1
ILMN_1683891	0.0371	0.00326	3.01547	-1.97337	3.5353	TFAP2C	transcription factor AP-2 gamma
ILMN_1701660	0.0318	0.00251	3.09249	-1.97427	1.26849	BTBD2	BTB domain containing 2
ILMN_1730917	0.0319	0.00252	-3.09346	-1.97496	-2.99324	KMO	kynurenine 3-monooxygenase (kynurenine 3-hydroxylase)
ILMN_1759513	0.0318	0.00251	-3.09257	-1.97517	-1.23345	RND3	Rho family GTPase 3
ILMN_1676631	0.0321	0.00256	3.09954	-1.97671	2.34245	CCNO	cyclin O
ILMN_1791820	0.0319	0.00252	3.09123	-1.97779	0.829944	ZNF768	zinc finger protein 768
ILMN_1683470	0.0319	0.00252	3.09158	-1.97794	2.25393	TMEM139	transmembrane protein 139
ILMN_1803278	0.032	0.00254	-3.09352	-1.97965	-1.79864	PGM5	phosphoglucomutase 5
ILMN_1675386	0.032	0.00253	-3.09029	-1.98156	-3.59136
ILMN_1791447	0.0321	0.00255	-3.08766	-1.98779	-2.26228	CXCL12	C-X-C motif chemokine ligand 12
ILMN_1665738	0.0321	0.00255	-3.08681	-1.99018	-0.951237	FLI1	Fli-1 proto-oncogene, ETS transcription factor
ILMN_1725679	0.0377	0.00335	3.01336	-1.99242	3.18242	ZNF596	zinc finger protein 596
ILMN_1720623	0.0323	0.00257	3.08508	-1.99612	1.71655	SYTL3	synaptotagmin like 3
ILMN_1755027	0.0325	0.00261	-3.08871	-1.99957	-1.41027	NLRP8	NLR family pyrin domain containing 8
ILMN_1678268	0.0324	0.00259	3.08341	-2.0008	0.601334	VPS8	VPS8, CORVET complex subunit
ILMN_1730625	0.0324	0.00259	-3.08277	-2.00148	-4.62421	AHSG	alpha 2-HS glycoprotein
ILMN_1661596	0.0324	0.00259	3.08228	-2.00286	0.636449	FLVCR1	feline leukemia virus subgroup C cellular receptor 1
ILMN_1733970	0.0325	0.0026	3.08146	-2.00624	1.43687	BAG1	BCL2 associated athanogene 1
ILMN_1696974	0.0325	0.0026	-3.08107	-2.00624	-2.59831	ANG	angiogenin
ILMN_1760493	0.0326	0.00261	-3.07954	-2.01052	-1.03388	LIMS2	LIM zinc finger domain containing 2
ILMN_1805448	0.0326	0.00262	-3.07916	-2.01156	-0.999028	EPB41L2	erythrocyte membrane protein band 4.1 like 2
ILMN_1766712	0.0327	0.00263	-3.08	-2.01256	-1.51351	TCF21	transcription factor 21
ILMN_1761348	0.0329	0.00266	3.08501	-2.014	1.76593	ZNF530	zinc finger protein 530
ILMN_1777221	0.0327	0.00262	-3.07822	-2.01419	-0.994616	SMIM11A	small integral membrane protein 11A
ILMN_1683239	0.0327	0.00263	-3.07806	-2.01574	-1.81756	RASSF1	Ras association domain family member 1
ILMN_1683112	0.0327	0.00264	-3.07795	-2.01714	-1.33981	FANCC	Fanconi anemia complementation group C
ILMN_1797191	0.0327	0.00263	3.07694	-2.01777	1.28458	KIAA0040	KIAA0040
ILMN_1664176	0.0327	0.00264	-3.0767	-2.01845	-1.83361	FBLN5	fibulin 5
ILMN_1722070	0.0328	0.00265	-3.07813	-2.01894	-4.98947	APOC3	apolipoprotein C3
ILMN_1678404	0.0329	0.00266	3.07798	-2.02291	1.50966
ILMN_1740762	0.0329	0.00266	3.0752	-2.02481	1.77762	GRB7	growth factor receptor bound protein 7
ILMN_1790136	0.0329	0.00265	3.07438	-2.02492	0.907666	MRGBP	MRG/MORF4L binding protein
ILMN_1684663	0.0329	0.00266	3.07425	-2.02528	1.24444	ZDHHC13	zinc finger DHHC-type containing 13
ILMN_1765159	0.0329	0.00266	3.07404	-2.02694	1.07209	ELMOD2	ELMO domain containing 2
ILMN_1736412	0.0331	0.00269	-3.07908	-2.02762	-1.83342	AMHR2	anti-Mullerian hormone receptor type 2
ILMN_1733226	0.0329	0.00266	-3.0732	-2.02819	-0.989612	KANK2	KN motif and ankyrin repeat domains 2
ILMN_1784287	0.0329	0.00267	-3.07303	-2.02867	-1.762	TGFBR3	transforming growth factor beta receptor 3
ILMN_1654109	0.0329	0.00267	-3.07291	-2.02902	-1.53073	EGFLAM	EGF like, fibronectin type III and laminin G domains
ILMN_1654411	0.0344	0.00289	3.05258	-2.02982	2.56316	CCL18	C-C motif chemokine ligand 18
ILMN_1814719	0.033	0.00268	-3.07205	-2.0325	-4.47336	RBP4	retinol binding protein 4
ILMN_1691156	0.033	0.00268	-3.07159	-2.03269	-1.88083	MT1A	metallothionein 1A
ILMN_1785071	0.033	0.00268	-3.07074	-2.03506	-2.13488	SEPP1	selenoprotein P, plasma, 1
ILMN_1730260	0.0331	0.00269	-3.06975	-2.03783	-0.732007	EEF1AKMT1	eukaryotic translation elongation factor 1 alpha lysine methyltransferase 1
ILMN_1696962	0.0331	0.0027	3.06951	-2.03849	1.0711	PDZD8	PDZ domain containing 8
ILMN_1664537	0.0331	0.0027	-3.06882	-2.04042	-0.706332	USP11	ubiquitin specific peptidase 11
ILMN_1718152	0.0334	0.00273	-3.06929	-2.04585	-2.47973	DEPDC7	DEP domain containing 7
ILMN_1654684	0.0334	0.00273	3.06772	-2.04676	1.70138	ADTRP	androgen dependent TFPI regulating protein
ILMN_1661251	0.0336	0.00276	-3.07241	-2.04879	-2.13037	SPAM1	sperm adhesion molecule 1
ILMN_1668593	0.0334	0.00273	-3.06509	-2.05081	-5.11066	HPX	hemopexin
ILMN_1720572	0.0334	0.00274	3.06579	-2.051	1.50797	CTNND1	catenin delta 1
ILMN_1809730	0.0341	0.00284	-3.08335	-2.0517	-1.76331	RXRG	retinoid X receptor gamma
ILMN_1781536	0.0334	0.00274	-3.06471	-2.05184	-1.80014	FAH	fumarylacetoacetate hydrolase
ILMN_1677636	0.0334	0.00274	3.06465	-2.05203	3.77301	COMP	cartilage oligomeric matrix protein
ILMN_1755758	0.0335	0.00275	-3.06647	-2.0525	-1.875	RIF1	replication timing regulatory factor 1
ILMN_1661428	0.0335	0.00274	-3.06514	-2.05282	-1.33995	ATP11C	ATPase phospholipid transporting 11C
ILMN_1790410	0.0335	0.00274	3.06408	-2.0536	0.750367	DROSHA	drosha ribonuclease III
ILMN_1696767	0.0335	0.00276	-3.06397	-2.05716	-1.74489	SERP2	stress-associated endoplasmic reticulum protein family member 2
ILMN_1736500	0.0335	0.00275	3.06271	-2.05743	0.318611	RACK1	receptor for activated C kinase 1
ILMN_1655482	0.0335	0.00275	3.06267	-2.05754	0.71949	TRIM27	tripartite motif containing 27
ILMN_1679133	0.0335	0.00275	3.06256	-2.05782	1.16612	SERPINB1	serpin family B member 1
ILMN_1791678	0.0336	0.00277	-3.06516	-2.05846	-5.17306	TAT	tyrosine aminotransferase
ILMN_1704672	0.0335	0.00276	3.06221	-2.0588	1.00263	NABP2	nucleic acid binding protein 2
ILMN_1694106	0.0335	0.00276	-3.06194	-2.05957	-1.14346	GPD1L	glycerol-3-phosphate dehydrogenase 1-like
ILMN_1711459	0.0353	0.00299	3.04283	-2.06034	1.64005
ILMN_1768293	0.0336	0.00276	3.06121	-2.06157	0.673555	NUP155	nucleoporin 155
ILMN_1684255	0.0336	0.00277	-3.06188	-2.06187	-0.987018	MYL4	myosin light chain 4
ILMN_1672094	0.034	0.00282	-3.06616	-2.06601	-1.95122	DLX1	distal-less homeobox 1
ILMN_1693242	0.0337	0.00278	3.05927	-2.06697	1.24722	ZNF296	zinc finger protein 296
ILMN_1697701	0.0337	0.00278	3.05921	-2.06713	1.20121	PLEKHJ1	pleckstrin homology domain containing J1
ILMN_1707975	0.0337	0.00279	-3.06072	-2.06731	-4.18286	SERPIND1	serpin family D member 1
ILMN_1672922	0.034	0.00282	-3.06598	-2.0679	-2.31377	CYTL1	cytokine like 1
ILMN_1769155	0.0337	0.00279	-3.05915	-2.06837	-4.03489	CYP2C8	cytochrome P450 family 2 subfamily C member 8
ILMN_1785756	0.0337	0.00279	3.05826	-2.06977	1.35763
ILMN_1701195	0.0337	0.00279	3.05823	-2.06987	1.7519	PLA2G7	phospholipase A2 group VII
ILMN_1795300	0.0339	0.00281	-3.05781	-2.07424	-2.16875	ARHGEF37	Rho guanine nucleotide exchange factor 37
ILMN_1725099	0.0339	0.00281	-3.05601	-2.07604	-1.95417	RAPGEF3	Rap guanine nucleotide exchange factor 3
ILMN_1673676	0.034	0.00282	3.05493	-2.07902	1.54947	SNX5	sorting nexin 5
ILMN_1656415	0.034	0.00282	-3.05478	-2.07945	-1.17448	CDKN2C	cyclin dependent kinase inhibitor 2C
ILMN_1763064	0.034	0.00282	3.05458	-2.08	1.22874	ATAD2	ATPase family, AAA domain containing 2
ILMN_1793302	0.0434	0.00419	2.9447	-2.08139	3.47036	WDR4	WD repeat domain 4
ILMN_1680652	0.034	0.00283	-3.0538	-2.08216	-2.01608	SELENBP1	selenium binding protein 1
ILMN_1670844	0.0341	0.00284	3.05433	-2.08281	1.65135	OPN3	opsin 3
ILMN_1673941	0.0346	0.00291	-3.06654	-2.08376	-2.17462	RBM24	RNA binding motif protein 24
ILMN_1724410	0.0341	0.00284	3.05245	-2.08591	0.763299	USP46	ubiquitin specific peptidase 46
ILMN_1710738	0.0341	0.00284	3.05213	-2.08679	0.796394	RC3H2	ring finger and CCCH-type domains 2
ILMN_1696128	0.0341	0.00284	-3.05213	-2.08679	-0.928848	RILPL1	Rab interacting lysosomal protein like 1
ILMN_1680507	0.0405	0.00377	2.98312	-2.08727	4.85152	PPP2R2C	protein phosphatase 2 regulatory subunit Bgamma
ILMN_1683475	0.0341	0.00285	3.05176	-2.0878	0.790143	TOMM40	translocase of outer mitochondrial membrane 40
ILMN_1668822	0.0359	0.00308	3.03168	-2.08826	2.27109	BATF	basic leucine zipper ATF-like transcription factor
ILMN_1723287	0.0343	0.00287	-3.05256	-2.091	-2.12749	SLC6A16	solute carrier family 6 member 16
ILMN_1749846	0.0344	0.00288	-3.05435	-2.09198	-2.6788	OMD	osteomodulin
ILMN_1757807	0.0344	0.00289	-3.05369	-2.09379	-4.0064	ETNPPL	ethanolamine-phosphate phospho-lyase
ILMN_1800078	0.0343	0.00287	-3.04959	-2.09383	-1.16683	LMO2	LIM domain only 2
ILMN_1787598	0.0346	0.00291	-3.05696	-2.09409	-4.57563	F9	coagulation factor IX
ILMN_1698728	0.0343	0.00287	3.04925	-2.09477	1.14434	FGD4	FYVE, RhoGEF and PH domain containing 4
ILMN_1669802	0.0345	0.0029	-3.05148	-2.09746	-4.56432	CYP8B1	cytochrome P450 family 8 subfamily B member 1
ILMN_1803060	0.0344	0.00288	3.0482	-2.09769	0.731347	MAML1	mastermind like transcriptional coactivator 1
ILMN_1731181	0.0344	0.00288	-3.04762	-2.09928	-0.697792	TEX2	testis expressed 2
ILMN_1801661	0.0344	0.00289	3.0473	-2.10018	2.13229	KRT7	keratin 7
ILMN_1776516	0.0344	0.00289	3.04696	-2.10111	2.04271	ITPKA	inositol-trisphosphate 3-kinase A
ILMN_1779347	0.0345	0.0029	-3.04806	-2.10124	-1.50988	GARNL3	GTPase activating Rap/RanGAP domain like 3
ILMN_1736389	0.0344	0.00289	-3.04664	-2.10199	-0.744256	SEC61B	Sec61 translocon beta subunit
ILMN_1702125	0.0345	0.0029	3.04714	-2.10271	2.87752	HOXB7	homeobox B7
ILMN_1735156	0.0346	0.00291	3.04424	-2.10865	1.7783	SLC4A11	solute carrier family 4 member 11
ILMN_1727199	0.0365	0.00316	3.02318	-2.1114	2.50796	KLC4	kinesin light chain 4
ILMN_1715068	0.0347	0.00292	-3.04322	-2.11146	-3.5898	AQP9	aquaporin 9
ILMN_1676899	0.0348	0.00293	3.04217	-2.11436	0.871272	YEATS2	YEATS domain containing 2
ILMN_1698484	0.0367	0.0032	3.02575	-2.11486	2.3863	RHOV	ras homolog family member V
ILMN_1669523	0.0348	0.00294	-3.04106	-2.11745	-1.79677	FOS	Fos proto-oncogene, AP-1 transcription factor subunit
ILMN_1798104	0.041	0.00384	2.96014	-2.11821	2.92467	GRIN2A	glutamate ionotropic receptor NMDA type subunit 2A
ILMN_1739794	0.0365	0.00317	3.01755	-2.11885	1.95551	CD3E	CD3e molecule
ILMN_1730432	0.0351	0.00297	3.04402	-2.11917	1.50774	IGSF8	immunoglobulin superfamily member 8
ILMN_1792323	0.0349	0.00295	-3.0407	-2.11944	-2.38673	HDC	histidine decarboxylase
ILMN_1690454	0.0349	0.00295	-3.03978	-2.12098	-1.25191	FAM212A	family with sequence similarity 212 member A
ILMN_1716264	0.0367	0.0032	3.01957	-2.12122	3.10181	ANKRD1	ankyrin repeat domain 1
ILMN_1764690	0.0354	0.003	-3.0473	-2.12192	-3.22051	NTS	neurotensin
ILMN_1747911	0.0367	0.0032	3.01569	-2.12498	2.35302	CDK1	cyclin dependent kinase 1
ILMN_1732612	0.0352	0.00298	3.03685	-2.12906	1.15329	SHB	SH2 domain containing adaptor protein B
ILMN_1778677	0.0352	0.00298	3.03685	-2.12907	1.49628	MRS2	MRS2, magnesium transporter
ILMN_1678831	0.0352	0.00298	3.0365	-2.13003	0.784986	GCC2	GRIP and coiled-coil domain containing 2
ILMN_1796018	0.0355	0.00302	-3.0395	-2.13403	-1.45507	NFATC4	nuclear factor of activated T-cells 4
ILMN_1681927	0.0354	0.00301	3.03391	-2.13718	0.947671	HDGFRP2	hepatoma-derived growth factor-related protein 2
ILMN_1772731	0.0354	0.00301	-3.0338	-2.13748	-0.979503	HAGH	hydroxyacylglutathione hydrolase
ILMN_1810474	0.0354	0.00301	3.0335	-2.13831	0.710779	UBE2I	ubiquitin conjugating enzyme E2 I
ILMN_1694840	0.0354	0.00301	-3.03344	-2.13847	-2.03464	MATN2	matrilin 2
ILMN_1686259	0.0356	0.00305	-3.0383	-2.1398	-4.04293	PRODH2	proline dehydrogenase 2
ILMN_1802518	0.0356	0.00304	3.03662	-2.14068	1.58433
ILMN_1793651	0.0355	0.00302	-3.03215	-2.14204	-0.591727	UBE2N	ubiquitin conjugating enzyme E2 N
ILMN_1718132	0.0355	0.00302	-3.03204	-2.14233	-1.16761	ECHS1	enoyl-CoA hydratase, short chain 1
ILMN_1752340	0.0355	0.00303	3.03157	-2.14363	0.836607	ARF5	ADP ribosylation factor 5
ILMN_1764609	0.0355	0.00303	3.03094	-2.14536	1.15583	PWWP2B	PWWP domain containing 2B
ILMN_1776267	0.0356	0.00304	3.03037	-2.14694	0.877324	CLN6	ceroid-lipofuscinosis, neuronal 6, late infantile, variant
ILMN_1761941	0.0356	0.00305	-3.02931	-2.14987	-1.51266	FAM198B	family with sequence similarity 198 member B
ILMN_1652521	0.0356	0.00305	-3.0293	-2.14989	-0.701459	MTMR9	myotubularin related protein 9
ILMN_1756910	0.0357	0.00306	3.02905	-2.15157	0.852618	PLA2G15	phospholipase A2 group XV
ILMN_1787410	0.0357	0.00306	3.02802	-2.15342	0.739404	EIF6	eukaryotic translation initiation factor 6
ILMN_1685431	0.0364	0.00315	-3.03603	-2.15998	-2.30803	DZIP1	DAZ interacting zinc finger protein 1
ILMN_1742432	0.0359	0.00308	3.02558	-2.16013	0.784128
ILMN_1700888	0.0359	0.00309	-3.02533	-2.16082	-2.09591	ENPP1	ectonucleotide pyrophosphatase/phosphodiesterase 1
ILMN_1701025	0.0359	0.00309	-3.02531	-2.16087	-2.04772	EPHX1	epoxide hydrolase 1
ILMN_1685109	0.0361	0.0031	3.02447	-2.16417	1.02008	POLR3D	RNA polymerase III subunit D
ILMN_1804597	0.0365	0.00318	3.03141	-2.1695	1.57468	DCAF17	DDB1 and CUL4 associated factor 17
ILMN_1778143	0.038	0.00339	3.00433	-2.16998	1.75387	GRAP2	GRB2-related adaptor protein 2
ILMN_1799628	0.0363	0.00312	3.02128	-2.17196	0.766605	NBR1	NBR1, autophagy cargo receptor
ILMN_1750347	0.0363	0.00313	-3.02127	-2.17297	-1.29013	C4orf3	chromosome 4 open reading frame 3
ILMN_1803745	0.0363	0.00313	-3.02063	-2.17375	-0.921427	SUOX	sulfite oxidase
ILMN_1759206	0.0363	0.00313	3.02097	-2.17379	1.7155	PLS1	plastin 1
ILMN_1720501	0.0364	0.00314	-3.02053	-2.175	-1.89258	ABCA9	ATP binding cassette subfamily A member 9
ILMN_1676727	0.0364	0.00314	3.02049	-2.17511	4.19963
ILMN_1689642	0.0364	0.00314	3.0197	-2.17631	0.579674	SSRP1	structure specific recognition protein 1
ILMN_1678215	0.0364	0.00315	-3.01886	-2.17861	-1.29968	RHOJ	ras homolog family member J
ILMN_1770005	0.0364	0.00315	-3.01873	-2.17896	-0.691462	PTPN18	protein tyrosine phosphatase, non-receptor type 18
ILMN_1745238	0.0431	0.00414	2.93618	-2.18321	5.07683	IGFL2	IGF like family member 2
ILMN_1714228	0.0365	0.00317	-3.01802	-2.18391	-1.78753	SPTBN1	spectrin beta, non-erythrocytic 1
ILMN_1790625	0.0365	0.00317	3.01687	-2.18408	0.895059	CBX3	chromobox 3
ILMN_1799848	0.0365	0.00317	3.01701	-2.18467	2.40783	ANKRD22	ankyrin repeat domain 22
ILMN_1789186	0.0365	0.00317	3.01661	-2.18479	0.901572	OBFC1	oligonucleotide/oligosaccharide binding fold containing 1
ILMN_1672928	0.0365	0.00317	3.01607	-2.18627	0.93793	DIP2B	disco interacting protein 2 homolog B
ILMN_1808982	0.0365	0.00317	3.01603	-2.18638	1.63563	SLC16A3	solute carrier family 16 member 3
ILMN_1720271	0.0367	0.00319	3.01565	-2.18939	2.25956	HAS3	hyaluronan synthase 3
ILMN_1710875	0.0367	0.0032	3.01379	-2.19349	3.65678	MYEOV	myeloma overexpressed
ILMN_1689306	0.0385	0.00348	2.9946	-2.19363	2.21734	TMC7	transmembrane channel like 7
ILMN_1653501	0.0367	0.00321	-3.01436	-2.19395	-2.43707	SEMA3B	semaphorin 3B
ILMN_1756126	0.0367	0.0032	3.01327	-2.19396	0.534597	STUB1	STIP1 homology and U-box containing protein 1
ILMN_1660775	0.0367	0.0032	3.01301	-2.19465	0.615866	TPM3	tropomyosin 3
ILMN_1756887	0.0367	0.00321	3.0126	-2.1958	0.724047	SLC39A1	solute carrier family 39 member 1
ILMN_1811630	0.0367	0.00321	-3.01223	-2.19681	-1.11498	BCAS3	BCAS3, microtubule associated cell migration factor
ILMN_1669722	0.0367	0.00321	3.01223	-2.19682	1.35077	LRRC61	leucine rich repeat containing 61
ILMN_1788700	0.0367	0.00321	-3.012	-2.19743	-0.972559	ZNF710	zinc finger protein 710
ILMN_1754199	0.0367	0.00322	3.01152	-2.19876	0.859757	BCL7B	BCL tumor suppressor 7B
ILMN_1778161	0.0368	0.00322	-3.01119	-2.19965	-1.03232	DNAJC25	DnaJ heat shock protein family (Hsp40) member C25
ILMN_1746171	0.0368	0.00322	3.0111	-2.19991	0.73674	H2AFY	H2A histone family member Y
ILMN_1751963	0.0368	0.00323	-3.01077	-2.20082	-0.78093	ZCWPW1	zinc finger CW-type and PWWP domain containing 1
ILMN_1674354	0.0368	0.00323	3.01065	-2.20114	1.09362	CNOT3	CCR4-NOT transcription complex subunit 3
ILMN_1808011	0.0381	0.00341	-3.03309	-2.20423	-2.67547	FAM46B	family with sequence similarity 46 member B
ILMN_1700831	0.037	0.00325	-3.01114	-2.20481	-3.03882	SLC27A2	solute carrier family 27 member 2
ILMN_1802389	0.0373	0.00329	-3.01047	-2.21214	-1.4421	CT55	cancer/testis antigen 55
ILMN_1800341	0.0389	0.00355	2.98436	-2.21535	1.84483	WDR66	WD repeat domain 66
ILMN_1673113	0.0373	0.00328	3.0054	-2.2155	1.58767	F2RL1	F2R like trypsin receptor 1
ILMN_1708502	0.0373	0.00328	3.00563	-2.21585	0.744255	AFF4	AF4/FMR2 family member 4
ILMN_1773352	0.0373	0.00328	3.00495	-2.21675	1.38674	CCL5	C-C motif chemokine ligand 5
ILMN_1792825	0.0373	0.00329	-3.00478	-2.21817	-0.564968	ARIH2	ariadne RBR E3 ubiquitin protein ligase 2
ILMN_1661194	0.0373	0.00329	-3.00437	-2.21834	-0.895656	CLDN14	claudin 14
ILMN_1685398	0.0373	0.00329	3.00422	-2.21875	1.11617	BAD	BCL2 associated agonist of cell death
ILMN_1804652	0.0373	0.00329	-3.00413	-2.21899	-0.908134	PLEKHH3	pleckstrin homology, MyTH4 and FERM domain containing H3
ILMN_1672988	0.0374	0.00331	3.00335	-2.22207	1.29203	LMNB1	lamin B1
ILMN_1781999	0.0374	0.0033	3.00298	-2.22214	0.887959	ABCF2	ATP binding cassette subfamily F member 2
ILMN_1716859	0.0375	0.00332	-3.00173	-2.22556	-2.84877	TDO2	tryptophan 2,3-dioxygenase
ILMN_1661002	0.0375	0.00332	3.00085	-2.22796	0.642358	RFWD2	ring finger and WD repeat domain 2
ILMN_1804448	0.0376	0.00333	3.00016	-2.22984	1.45126	MSI2	musashi RNA binding protein 2
ILMN_1756777	0.0376	0.00334	-2.99956	-2.23149	-1.94388	HBEGF	heparin binding EGF like growth factor
ILMN_1815385	0.0381	0.00343	-3.0111	-2.2319	-2.102	SMAD9	SMAD family member 9
ILMN_1729311	0.0377	0.00335	-3.00038	-2.23314	-1.74667
ILMN_1662741	0.0377	0.00334	2.99889	-2.23331	1.34196	LPAR2	lysophosphatidic acid receptor 2
ILMN_1761175	0.0377	0.00335	2.99862	-2.23406	0.943564
ILMN_1738237	0.0377	0.00335	2.99815	-2.23534	0.753962	HS1BP3	HCLS1 binding protein 3
ILMN_1776112	0.0379	0.00338	-3.00128	-2.23599	-4.81615	SLC10A1	solute carrier family 10 member 1
ILMN_1700267	0.0404	0.00375	2.99227	-2.23603	2.83045	UGT1A8	UDP glucuronosyltransferase family 1 member A8
ILMN_1717101	0.0397	0.00364	2.97699	-2.2363	1.89672	MINK1	misshapen like kinase 1
ILMN_1801606	0.0377	0.00336	2.99764	-2.23671	0.627684	AMZ2	archaelysin family metallopeptidase 2
ILMN_1802242	0.0396	0.00362	2.97442	-2.23687	1.73879	POFUT1	protein O-fucosyltransferase 1
ILMN_1757506	0.038	0.00339	-3.00219	-2.23695	-1.60773	ELN	elastin
ILMN_1698685	0.0379	0.00339	-3.00042	-2.23834	-2.3994	MATN2	matrilin 2
ILMN_1705685	0.0379	0.00337	-2.99621	-2.24063	-1.00236	MEIS1	Meis homeobox 1
ILMN_1665449	0.0379	0.00338	-2.99567	-2.24212	-1.07803	ROBO4	roundabout guidance receptor 4
ILMN_1700257	0.0379	0.00338	-2.99549	-2.2426	-0.976749	C4orf32	chromosome 4 open reading frame 32
ILMN_1673639	0.0379	0.00339	-2.99525	-2.2442	-2.18567	ABI3BP	ABI family member 3 binding protein
ILMN_1750876	0.0379	0.00339	2.99476	-2.24458	0.606396	SLC4A1AP	solute carrier family 4 member 1 adaptor protein
ILMN_1668880	0.0381	0.00342	-2.99447	-2.24925	-3.74903	AKR1C4	aldo-keto reductase family 1, member C4
ILMN_1800874	0.0529	0.00568	2.9643	-2.24965	4.10251	MRO	maestro
ILMN_1768962	0.0381	0.00341	2.99217	-2.25165	1.02486	AKAP8L	A-kinase anchoring protein 8 like
ILMN_1731292	0.0385	0.00348	-3.00029	-2.25218	-3.87469	CA5A	carbonic anhydrase 5A
ILMN_1659599	0.0381	0.00342	2.99187	-2.25246	1.1411	AZIN2	antizyme inhibitor 2
ILMN_1694539	0.0381	0.00342	-2.99182	-2.2526	-1.1174	MAP3K6	mitogen-activated protein kinase kinase kinase 6
ILMN_1774742	0.0381	0.00343	-2.99213	-2.25365	-3.74178	MTTP	microsomal triglyceride transfer protein
ILMN_1661293	0.0381	0.00342	2.99109	-2.2546	0.756559	ZNF224	zinc finger protein 224
ILMN_1713143	0.0381	0.00343	2.99079	-2.2554	0.621224	MRPL3	mitochondrial ribosomal protein L3
ILMN_1770172	0.0382	0.00343	2.99082	-2.25627	1.62698	ZNF669	zinc finger protein 669
ILMN_1770442	0.0406	0.00379	2.97901	-2.25651	1.77587	OR52N1	olfactory receptor family 52 subfamily N member 1
ILMN_1811991	0.0382	0.00344	2.98997	-2.25765	0.872301	OGFOD3	2-oxoglutarate and iron dependent oxygenase domain containing 3
ILMN_1692983	0.0384	0.00347	-2.99359	-2.25795	-5.26153	SULT2A1	sulfotransferase family 2A member 1
ILMN_1777963	0.0477	0.00483	2.95199	-2.25818	2.7541	CCDC181	coiled-coil domain containing 181
ILMN_1815933	0.0382	0.00344	2.98946	-2.25905	0.626754	MRM2	mitochondrial rRNA methyltransferase 2
ILMN_1666781	0.0536	0.00578	2.83595	-2.26188	4.99251	C4orf36	chromosome 4 open reading frame 36
ILMN_1751877	0.0384	0.00346	-2.98762	-2.26406	-2.10652	EHHADH	enoyl-CoA, hydratase/3-hydroxyacyl CoA dehydrogenase
ILMN_1731293	0.0384	0.00347	-2.98778	-2.26454	-3.93816	C8B	complement component 8, beta polypeptide
ILMN_1807610	0.0389	0.00354	-2.99704	-2.26511	-1.67154	PRPH2	peripherin 2
ILMN_1716006	0.0433	0.00416	2.94692	-2.26568	2.17059	C18orf54	chromosome 18 open reading frame 54
ILMN_1710697	0.0384	0.00347	2.98691	-2.26598	0.703174	BUD31	BUD31 homolog
ILMN_1790485	0.0526	0.00562	2.93086	-2.26711	3.39682
ILMN_1808047	0.0385	0.00347	2.98631	-2.26761	0.741022	PHC2	polyhomeotic homolog 2
ILMN_1727723	0.0389	0.00354	-2.99401	-2.26905	-3.76817	MASP2	mannan binding lectin serine peptidase 2
ILMN_1699112	0.0386	0.00349	2.98487	-2.27152	0.587587	COPB1	coatomer protein complex subunit beta 1
ILMN_1725620	0.0386	0.00349	2.98439	-2.27284	0.492115	GGNBP2	gametogenetin binding protein 2
ILMN_1799058	0.0386	0.0035	2.98524	-2.27336	1.82175	C6orf223	chromosome 6 open reading frame 223
ILMN_1778357	0.041	0.00383	-3.02461	-2.27368	-2.95106	DNMT3L	DNA methyltransferase 3 like
ILMN_1716445	0.0386	0.0035	2.98395	-2.27403	1.21239	DTYMK	deoxythymidylate kinase
ILMN_1754178	0.0386	0.0035	2.98389	-2.27419	0.579326	GDI2	GDP dissociation inhibitor 2
ILMN_1722073	0.0386	0.0035	-2.98351	-2.27525	-2.41921	MLXIPL	MLX interacting protein like
ILMN_1801257	0.05	0.0052	2.85841	-2.27581	4.03259	CENPA	centromere protein A
ILMN_1797154	0.0387	0.00351	-2.98252	-2.27792	-2.76595	AZGP1	alpha-2-glycoprotein 1, zinc-binding
ILMN_1671753	0.0387	0.00352	-2.98261	-2.27859	-4.18354	F2	coagulation factor II, thrombin
ILMN_1697550	0.0388	0.00352	-2.98182	-2.27983	-1.00914	ACYP2	acylphosphatase 2
ILMN_1684321	0.0388	0.00353	2.98145	-2.28083	0.63103	CYB5B	cytochrome b5 type B
ILMN_1681131	0.0388	0.00353	2.98125	-2.28138	0.704958	MRPL43	mitochondrial ribosomal protein L43
ILMN_1801090	0.0389	0.00355	-2.98303	-2.28231	-2.14077	KRT222	keratin 222
ILMN_1723048	0.0389	0.00355	-2.97946	-2.28625	-1.62793	GJC2	gap junction protein gamma 2
ILMN_1779281	0.039	0.00356	-2.97911	-2.28905	-1.93484	HAPLN4	hyaluronan and proteoglycan link protein 4
ILMN_1671731	0.039	0.00356	-2.97802	-2.29017	-1.3425	AVPI1	arginine vasopressin induced 1
ILMN_1717572	0.0402	0.00372	-2.99471	-2.29286	-2.4176	PGA5	pepsinogen 5, group I (pepsinogen A)
ILMN_1768226	0.0393	0.00359	2.97606	-2.29638	1.06407	ARMCX6	armadillo repeat containing, X-linked 6
ILMN_1785284	0.0393	0.00359	-2.97512	-2.29801	-1.95997	ALDH6A1	aldehyde dehydrogenase 6 family member A1
ILMN_1737126	0.0593	0.0068	2.96052	-2.29869	4.64716
ILMN_1736078	0.0398	0.00365	-2.98059	-2.3	-3.66324	THBS4	thrombospondin 4
ILMN_1710268	0.0406	0.00378	-2.9921	-2.30365	-2.59471	ZNF385D	zinc finger protein 385D
ILMN_1790100	0.0396	0.00363	2.97401	-2.3038	1.49321	DDIAS	DNA damage induced apoptosis suppressor
ILMN_1708130	0.0396	0.00362	2.97253	-2.30504	1.66544	EHF	ETS homologous factor
ILMN_1688392	0.0417	0.00393	2.9499	-2.30669	2.85261	ZBED2	zinc finger BED-type containing 2
ILMN_2038778	0.0396	0.00363	2.97186	-2.30686	0.721275	GAPDH	glyceraldehyde-3-phosphate dehydrogenase
ILMN_1700306	0.0397	0.00364	2.97127	-2.30847	0.871401	OCIAD2	OCIA domain containing 2
ILMN_1694608	0.0398	0.00366	-2.97118	-2.31147	-1.72187	C1QTNF1	C1q and tumor necrosis factor related protein 1
ILMN_1707123	0.0398	0.00365	2.97021	-2.31223	1.11932	DDX19B	DEAD-box helicase 19B
ILMN_1699044	0.0398	0.00365	-2.9696	-2.31299	-0.784517	VAMP2	vesicle associated membrane protein 2
ILMN_1807423	0.0398	0.00366	2.96998	-2.31377	2.67387	IGF2BP3	insulin like growth factor 2 mRNA binding protein 3
ILMN_1740619	0.0398	0.00366	2.96886	-2.31498	2.19724	ARL14	ADP ribosylation factor like GTPase 14
ILMN_1794163	0.0446	0.00436	2.92164	-2.31596	2.38743	TMOD4	tropomodulin 4
ILMN_1663388	0.0399	0.00367	2.96812	-2.31701	0.775392	TUBA1C	tubulin alpha 1c
ILMN_1670646	0.0399	0.00367	2.96796	-2.31743	1.48975	SLC22A15	solute carrier family 22 member 15
ILMN_1707342	0.0399	0.00368	-2.96804	-2.31811	-1.44854	LRIG1	leucine rich repeats and immunoglobulin like domains 1
ILMN_1713438	0.0399	0.00368	-2.96798	-2.31826	-3.03174	APOM	apolipoprotein M
ILMN_1657016	0.0399	0.00368	-2.96737	-2.31904	-1.11897	ANK3	ankyrin 3, node of Ranvier (ankyrin G)
ILMN_1814789	0.04	0.00369	2.96611	-2.32243	0.817303	UBAP2L	ubiquitin associated protein 2 like
ILMN_1718907	0.04	0.00369	-2.96604	-2.32262	-0.788815	TSHZ1	teashirt zinc finger homeobox 1
ILMN_1797298	0.04	0.0037	2.96589	-2.32303	1.20665	ARMC7	armadillo repeat containing 7
ILMN_1749789	0.0404	0.00375	2.97138	-2.32473	1.87282	HIST1H1D	histone cluster 1, H1d
ILMN_1678714	0.0422	0.00402	2.94354	-2.32571	1.74938	CDHR4	cadherin related family member 4
ILMN_1670355	0.0595	0.00683	2.90474	-2.32735	4.37337	OTOGL	otogelin like
ILMN_1778240	0.0402	0.00372	-2.96406	-2.32797	-1.2855	GFOD1	glucose-fructose oxidoreductase domain containing 1
ILMN_1799759	0.0403	0.00372	-2.96455	-2.32845	-2.40485	GPC3	glypican 3
ILMN_1689111	0.0404	0.00374	-2.96569	-2.32919	-2.34176	CXCL12	C-X-C motif chemokine ligand 12
ILMN_1764098	0.0458	0.00454	2.92812	-2.33214	2.12812
ILMN_1681016	0.0403	0.00373	2.96248	-2.33226	0.765815	SPNS1	sphingolipid transporter 1 (putative)
ILMN_1724544	0.0404	0.00374	2.96219	-2.33304	0.7351	PPP4R1	protein phosphatase 4 regulatory subunit 1
ILMN_1785795	0.0404	0.00374	2.96179	-2.33411	0.665134	METAP1	methionyl aminopeptidase 1
ILMN_1777031	0.0404	0.00375	-2.96124	-2.33561	-2.43176	PKLR	pyruvate kinase, liver and RBC
ILMN_1697777	0.0404	0.00375	2.96077	-2.33689	1.03296	TSTA3	tissue specific transplantation antigen P35B
ILMN_1718070	0.0404	0.00375	-2.9606	-2.33733	-0.961572	CASP9	caspase 9
ILMN_1768425	0.0405	0.00376	-2.95994	-2.33912	-4.23236	TF	transferrin
ILMN_1655713	0.0534	0.00575	2.85068	-2.34013	3.05173	OR2M7	olfactory receptor family 2 subfamily M member 7
ILMN_1654212	0.0406	0.00379	2.9596	-2.34273	1.66635	DOK7	docking protein 7
ILMN_1668814	0.0525	0.00561	2.82878	-2.34305	3.3984	CENPM	centromere protein M
ILMN_1656560	0.0406	0.00378	-2.9583	-2.34355	-2.15083	PARM1	prostate androgen-regulated mucin-like protein 1
ILMN_1764158	0.0406	0.00379	-2.9576	-2.34544	-1.19857	NLGN2	neuroligin 2
ILMN_1799062	0.0407	0.00379	2.95723	-2.34643	1.11799	NFKB2	nuclear factor kappa B subunit 2
ILMN_1771118	0.0408	0.0038	-2.95622	-2.34916	-3.02482	SLCO1B1	solute carrier organic anion transporter family member 1B1
[truncated: 20,185 more rows]

## Sheet: GSE32225
ID	adj.P.Val	P.Value	t	B	logFC
ILMN_2298261	1.26e-19	5.14e-24	12.0372	43.362	1.62836
ILMN_1693538	2.9e-19	2.36e-23	11.7945	41.9077	2.50942
ILMN_2306189	6.44e-14	9.64e-18	9.71609	29.5478	1.44109
ILMN_1757270	6.44e-14	1.16e-17	9.6855	29.3687	2.60568
ILMN_1777881	6.44e-14	1.31e-17	9.66559	29.2522	2.13392
ILMN_1655915	4.56e-13	1.23e-16	9.29763	27.1088	2.63041
ILMN_1759084	4.56e-13	1.3e-16	9.28786	27.0522	1.3066
ILMN_1733110	2.13e-12	7.5e-16	8.99709	25.3744	1.5314
ILMN_2408764	2.13e-12	7.81e-16	-8.99038	25.3358	-1.79555
ILMN_2130218	4.78e-12	2.11e-15	-8.82439	24.3851	-1.7299
ILMN_2169025	4.78e-12	2.14e-15	8.82138	24.368	1.72588
ILMN_2104356	9.74e-12	4.77e-15	8.68692	23.602	1.57426
ILMN_1701308	6.91e-11	3.66e-14	8.34053	21.6469	2.79513
ILMN_2116714	8.14e-11	4.64e-14	8.29995	21.4196	1.29273
ILMN_1783394	9.27e-11	5.67e-14	8.26569	21.2282	1.5899
ILMN_1811117	9.49e-11	6.19e-14	8.25066	21.1443	1.53173
ILMN_2179083	1.08e-10	7.56e-14	8.21641	20.9532	2.04336
ILMN_1663667	1.08e-10	8.04e-14	8.20582	20.8942	1.59961
ILMN_1711823	1.08e-10	8.38e-14	8.19861	20.854	0.895067
ILMN_2319952	1.12e-10	9.4e-14	8.17875	20.7435	1.66676
ILMN_1768962	1.12e-10	9.63e-14	8.17469	20.7209	1.31998
ILMN_1784436	2.96e-10	2.66e-13	7.99895	19.7475	1.66513
ILMN_1688865	3.87e-10	3.63e-13	7.9448	19.4492	1.01711
ILMN_1801101	7.93e-10	7.89e-13	7.80917	18.7058	1.02441
ILMN_1741459	7.93e-10	8.08e-13	7.80488	18.6824	1.62211
ILMN_1790637	8.17e-10	8.67e-13	7.79268	18.6158	1.62344
ILMN_1683811	1.35e-09	1.52e-12	7.69424	18.0801	1.27372
ILMN_1790136	1.35e-09	1.55e-12	7.69069	18.0608	1.42289
ILMN_2091632	1.35e-09	1.59e-12	-7.68558	18.0331	-1.85959
ILMN_1724250	1.38e-09	1.69e-12	7.67508	17.9761	1.74966
ILMN_2175447	1.64e-09	2.08e-12	7.63867	17.7789	1.67334
ILMN_1678841	1.64e-09	2.17e-12	7.63086	17.7367	1.48998
ILMN_1701413	1.64e-09	2.22e-12	7.62692	17.7153	1.24926
ILMN_1721563	1.64e-09	2.28e-12	7.62236	17.6907	0.817399
ILMN_1800530	1.74e-09	2.48e-12	7.607	17.6078	1.59791
ILMN_2284667	2.07e-09	3.04e-12	7.57123	17.4148	1.70409
ILMN_1716922	3.87e-09	5.83e-12	7.45484	16.7897	1.43424
ILMN_1774134	3.91e-09	6.05e-12	7.44824	16.7544	1.04538
ILMN_1658175	4.62e-09	7.35e-12	7.4134	16.5682	1.36553
ILMN_1771870	5.17e-09	8.43e-12	7.38884	16.4372	1.46464
ILMN_1752249	6.05e-09	1.01e-11	7.35607	16.2627	1.42562
ILMN_1814985	6.42e-09	1.1e-11	7.34103	16.1828	2.16556
ILMN_1660749	7.05e-09	1.24e-11	7.32007	16.0715	0.826535
ILMN_1726981	7.7e-09	1.39e-11	7.29893	15.9594	1.31888
ILMN_1741133	7.7e-09	1.41e-11	7.29596	15.9436	1.1561
ILMN_2186369	8.56e-09	1.61e-11	7.27195	15.8165	1.26414
ILMN_1694731	8.56e-09	1.64e-11	7.26885	15.8002	0.601075
ILMN_1700384	8.73e-09	1.71e-11	7.26145	15.761	1.56953
ILMN_1700611	1.05e-08	2.1e-11	7.22444	15.5656	1.13259
ILMN_1799614	1.07e-08	2.19e-11	7.2169	15.5258	1.37778
ILMN_1737131	1.14e-08	2.36e-11	-7.20263	15.4507	-2.16587
ILMN_2146566	1.27e-08	2.72e-11	7.17736	15.3177	1.43128
ILMN_1667754	1.27e-08	2.75e-11	-7.17501	15.3054	-1.75674
ILMN_1773567	1.41e-08	3.11e-11	7.15289	15.1892	1.65162
ILMN_2402600	1.5e-08	3.36e-11	7.13885	15.1156	1.75479
ILMN_2260643	1.58e-08	3.6e-11	-7.12607	15.0486	-1.54686
ILMN_2288402	1.63e-08	3.78e-11	7.11691	15.0006	2.1048
ILMN_1689257	1.63e-08	3.87e-11	7.11298	14.98	1.35093
ILMN_1753426	1.64e-08	3.95e-11	7.10893	14.9589	1.09331
ILMN_1758633	1.93e-08	4.72e-11	7.07662	14.79	1.49447
ILMN_1675483	2.01e-08	5e-11	7.06592	14.7342	1.70422
ILMN_1781514	2.58e-08	6.53e-11	7.01679	14.4784	1.25835
ILMN_1773295	2.77e-08	7.12e-11	-7.00098	14.3963	-1.53712
ILMN_1814952	2.9e-08	7.57e-11	6.98972	14.3378	1.8517
ILMN_1779735	3.43e-08	9.09e-11	6.9559	14.1626	1.11589
ILMN_2405233	3.45e-08	9.27e-11	6.9522	14.1434	1.57142
ILMN_1786718	3.46e-08	9.45e-11	6.9488	14.1258	0.914819
ILMN_1687391	3.49e-08	9.68e-11	-6.94424	14.1023	-1.53937
ILMN_1776412	3.75e-08	1.05e-10	-6.92835	14.0202	-1.1093
ILMN_1775170	3.78e-08	1.08e-10	-6.92438	13.9996	-2.43646
ILMN_1809145	3.78e-08	1.09e-10	6.92147	13.9846	2.29234
ILMN_1673892	3.85e-08	1.13e-10	6.91567	13.9547	1.1212
ILMN_1745737	4.41e-08	1.32e-10	6.88648	13.8042	1.51842
ILMN_1815366	4.41e-08	1.35e-10	6.88247	13.7836	2.31128
ILMN_1690822	4.41e-08	1.36e-10	6.88066	13.7743	1.61
ILMN_1699496	4.41e-08	1.37e-10	6.88027	13.7723	1.54485
ILMN_2413779	4.41e-08	1.38e-10	6.87789	13.7601	2.00969
ILMN_1675941	4.59e-08	1.46e-10	-6.86809	13.7096	-1.16263
ILMN_2155452	4.65e-08	1.51e-10	-6.86128	13.6747	-1.28799
ILMN_2134224	4.65e-08	1.52e-10	6.86112	13.6738	0.73651
ILMN_1759008	6.06e-08	2e-10	6.8093	13.4081	1.05414
ILMN_1656066	6.48e-08	2.17e-10	6.79437	13.3317	1.45852
ILMN_1653319	6.79e-08	2.3e-10	6.78362	13.2768	1.50299
ILMN_2055634	8.6e-08	2.94e-10	6.73701	13.0392	1.47528
ILMN_1676997	9.45e-08	3.28e-10	-6.717	12.9374	-1.66481
ILMN_2411559	9.68e-08	3.4e-10	6.71025	12.9031	1.4373
ILMN_1779171	9.84e-08	3.49e-10	6.70509	12.8769	2.16584
ILMN_1657435	1.09e-07	3.92e-10	-6.68331	12.7664	-1.27408
ILMN_2385220	1.16e-07	4.19e-10	6.6705	12.7016	1.29221
ILMN_2342250	1.17e-07	4.28e-10	6.66673	12.6825	0.981402
ILMN_2286334	1.43e-07	5.29e-10	6.62665	12.48	1.37293
ILMN_2389582	1.46e-07	5.56e-10	6.61731	12.4329	1.1911
ILMN_2386040	1.46e-07	5.56e-10	6.61729	12.4328	1.50185
ILMN_1768470	1.46e-07	5.6e-10	6.61596	12.4261	1.38813
ILMN_1687301	1.51e-07	5.83e-10	6.60811	12.3866	1.57786
ILMN_1657893	1.65e-07	6.44e-10	6.58915	12.2912	1.02319
ILMN_1709439	1.65e-07	6.53e-10	6.58674	12.279	1.07658
ILMN_1767474	1.67e-07	6.69e-10	-6.58198	12.2551	-1.89682
ILMN_2387471	1.99e-07	8.07e-10	6.54629	12.076	1.86241
ILMN_2181064	1.99e-07	8.1e-10	-6.54571	12.0732	-1.17693
ILMN_2379469	2.07e-07	8.53e-10	6.53575	12.0233	0.738455
ILMN_1735816	2.18e-07	9.06e-10	-6.52421	11.9655	-2.77658
ILMN_1811114	2.18e-07	9.17e-10	-6.52203	11.9547	-2.1279
ILMN_2215965	2.71e-07	1.15e-09	-6.47917	11.7407	-1.73527
ILMN_1671005	2.92e-07	1.25e-09	6.46272	11.6589	1.07599
ILMN_1679962	3.49e-07	1.51e-09	-6.42653	11.4791	-1.45833
ILMN_1660880	3.68e-07	1.61e-09	6.41448	11.4194	1.05138
ILMN_1753584	3.75e-07	1.65e-09	6.40921	11.3933	1.62969
ILMN_2345016	3.78e-07	1.68e-09	6.40562	11.3756	1.43492
ILMN_1771652	3.87e-07	1.74e-09	6.39962	11.3459	1.85648
ILMN_1681678	3.93e-07	1.78e-09	6.39463	11.3212	1.06632
ILMN_1809147	4.07e-07	1.86e-09	6.38616	11.2793	1.50769
ILMN_1659564	4.4e-07	2.03e-09	6.36954	11.1973	0.7581
ILMN_2118621	4.63e-07	2.17e-09	-6.35623	11.1317	-1.27506
ILMN_1729167	4.63e-07	2.19e-09	6.355	11.1256	1.16879
ILMN_1776112	4.63e-07	2.19e-09	-6.3547	11.1241	-1.4052
ILMN_1771815	4.68e-07	2.23e-09	6.351	11.1059	0.900703
ILMN_1802157	4.93e-07	2.37e-09	6.33907	11.0472	0.895129
ILMN_2100437	5.06e-07	2.46e-09	-6.33225	11.0136	-2.20926
ILMN_1793829	5.06e-07	2.49e-09	6.3297	11.0011	1.22162
ILMN_2311989	5.06e-07	2.5e-09	6.32923	10.9988	1.1106
ILMN_1791678	5.49e-07	2.73e-09	-6.31194	10.9139	-2.73593
ILMN_1682738	5.83e-07	2.93e-09	6.29848	10.8479	1.14881
ILMN_1711606	6.18e-07	3.13e-09	6.28555	10.7845	1.45273
ILMN_2159453	6.2e-07	3.16e-09	6.2833	10.7735	1.15946
ILMN_1746832	6.37e-07	3.27e-09	6.27666	10.741	1.63664
ILMN_1697629	6.37e-07	3.3e-09	6.27503	10.7331	1.13728
ILMN_2148819	8.51e-07	4.44e-09	6.21687	10.4494	1.09529
ILMN_1812392	9.27e-07	4.88e-09	6.19861	10.3607	1.4566
ILMN_1788239	9.95e-07	5.27e-09	-6.18328	10.2863	-1.45734
ILMN_1696757	1e-06	5.37e-09	6.17987	10.2698	1.6906
ILMN_1773380	1.01e-06	5.49e-09	6.17533	10.2478	2.04699
ILMN_2355274	1.01e-06	5.5e-09	-6.17487	10.2456	-0.975492
ILMN_1793716	1.02e-06	5.59e-09	-6.17184	10.2309	-1.21772
ILMN_1680692	1.04e-06	5.72e-09	6.1672	10.2084	1.1103
ILMN_2325234	1.09e-06	6.03e-09	6.15702	10.1592	1.23546
ILMN_1789593	1.26e-06	7.02e-09	6.12692	10.0138	1.70874
ILMN_1745049	1.27e-06	7.17e-09	6.12282	9.99406	1.21697
ILMN_1780667	1.42e-06	8.03e-09	6.10036	9.88592	1.968
ILMN_1815882	1.43e-06	8.17e-09	6.09693	9.86943	0.782247
ILMN_2368268	1.43e-06	8.21e-09	-6.09602	9.86504	-0.810367
ILMN_2404625	1.59e-06	9.21e-09	6.07321	9.75551	1.13125
ILMN_1707975	1.61e-06	9.41e-09	-6.0689	9.73486	-1.93147
ILMN_1655525	1.66e-06	9.74e-09	6.06199	9.70171	1.82053
ILMN_1772537	1.74e-06	1.03e-08	6.05063	9.64733	2.18031
ILMN_2298936	1.74e-06	1.04e-08	6.04988	9.64373	1.17144
ILMN_2290732	1.76e-06	1.05e-08	-6.0464	9.6271	-1.63441
ILMN_1740402	1.84e-06	1.11e-08	-6.03642	9.57939	-1.41849
ILMN_1725910	1.84e-06	1.12e-08	-6.03413	9.56845	-1.73593
ILMN_1810147	1.87e-06	1.14e-08	6.02997	9.54859	1.04727
ILMN_2122926	2.08e-06	1.28e-08	-6.00711	9.43951	-0.817143
ILMN_1734184	2.17e-06	1.34e-08	5.99802	9.39623	1.16977
ILMN_2127842	2.18e-06	1.36e-08	-5.99503	9.38202	-1.77683
ILMN_2373982	2.19e-06	1.37e-08	5.9934	9.37428	0.886838
ILMN_1660533	2.29e-06	1.45e-08	5.9828	9.32388	0.757751
ILMN_1668910	2.29e-06	1.46e-08	-5.9816	9.31816	-1.81096
ILMN_1669310	2.42e-06	1.55e-08	5.96897	9.25817	0.985225
ILMN_1702837	2.43e-06	1.56e-08	5.9674	9.25075	0.342276
ILMN_1775939	2.49e-06	1.61e-08	5.96147	9.22261	1.44223
ILMN_1774938	2.58e-06	1.69e-08	5.95208	9.17811	1.00295
ILMN_1711994	2.58e-06	1.69e-08	5.95178	9.17668	1.83726
ILMN_1806122	2.58e-06	1.72e-08	5.94861	9.16168	1.14776
ILMN_1772233	2.58e-06	1.72e-08	5.94848	9.16104	1.03942
ILMN_1704045	2.58e-06	1.72e-08	-5.94797	9.15864	-2.50207
ILMN_1797522	2.84e-06	1.91e-08	5.92689	9.05892	1.04964
ILMN_2364022	2.87e-06	1.94e-08	5.9237	9.04386	1.69615
ILMN_2172588	2.97e-06	2.03e-08	5.91543	9.00481	1.08202
ILMN_1773079	3.15e-06	2.15e-08	5.90301	8.94622	1.67102
ILMN_2382121	3.17e-06	2.19e-08	5.8997	8.93061	0.997536
ILMN_1721703	3.17e-06	2.2e-08	5.89896	8.92717	1.26785
ILMN_2395373	3.17e-06	2.21e-08	5.89775	8.92143	1.35166
ILMN_1726516	3.3e-06	2.31e-08	5.88862	8.87846	1.31385
ILMN_1751228	3.31e-06	2.33e-08	5.88698	8.87074	2.12501
ILMN_1815203	3.38e-06	2.4e-08	-5.88128	8.84394	-1.99239
ILMN_1742444	3.57e-06	2.54e-08	-5.86938	8.78802	-1.38146
ILMN_2396697	4.1e-06	2.94e-08	-5.83987	8.64965	-1.01407
ILMN_1751958	4.28e-06	3.09e-08	5.83006	8.60376	0.912784
ILMN_1746206	4.3e-06	3.12e-08	5.828	8.59412	0.823815
ILMN_2364535	4.37e-06	3.19e-08	5.82343	8.57273	0.863771
ILMN_1709775	4.41e-06	3.25e-08	5.81976	8.55561	1.61122
ILMN_1730630	4.41e-06	3.25e-08	5.81944	8.5541	1.00989
ILMN_1773847	4.42e-06	3.28e-08	5.81787	8.54675	0.803847
ILMN_1758412	4.42e-06	3.3e-08	5.81684	8.54198	1.11495
ILMN_2103547	4.5e-06	3.38e-08	5.81188	8.51882	1.39024
ILMN_1703708	4.6e-06	3.48e-08	-5.80592	8.49101	-1.4984
ILMN_1773369	4.6e-06	3.49e-08	5.80533	8.48824	1.57875
ILMN_1798081	4.65e-06	3.54e-08	5.80204	8.47292	1.39789
ILMN_1757877	4.67e-06	3.58e-08	5.79982	8.46254	1.1339
ILMN_1669023	4.7e-06	3.62e-08	-5.79746	8.45155	-1.42255
ILMN_1691881	4.79e-06	3.71e-08	5.79254	8.42866	1.28179
ILMN_1698117	4.86e-06	3.78e-08	-5.78864	8.41048	-1.24813
ILMN_2398865	4.89e-06	3.83e-08	5.7861	8.39865	0.940765
ILMN_1765613	5e-06	3.93e-08	-5.7807	8.37353	-1.60245
ILMN_1754529	5.08e-06	4.02e-08	5.77621	8.35267	2.15094
ILMN_1773780	5.08e-06	4.04e-08	5.77534	8.34859	0.933607
ILMN_1657547	5.31e-06	4.25e-08	5.7651	8.30103	1.22872
ILMN_1690921	5.31e-06	4.27e-08	5.76408	8.29631	0.880965
ILMN_1793220	5.32e-06	4.3e-08	5.76275	8.29014	1.05913
ILMN_1760441	5.46e-06	4.44e-08	5.75615	8.25949	1.01734
ILMN_1787256	5.46e-06	4.47e-08	5.75456	8.25213	1.72178
ILMN_1733932	5.46e-06	4.47e-08	5.75445	8.25161	0.927549
ILMN_1784766	5.47e-06	4.5e-08	5.75314	8.24554	0.796481
ILMN_1759184	5.51e-06	4.63e-08	5.74756	8.21967	1.54832
ILMN_2400360	5.51e-06	4.63e-08	-5.74749	8.21935	-1.17586
ILMN_1699859	5.51e-06	4.63e-08	5.74742	8.219	0.89528
ILMN_1724738	5.51e-06	4.63e-08	-5.74735	8.21872	-2.24582
ILMN_1677756	5.64e-06	4.76e-08	5.74155	8.19185	0.939146
ILMN_1809456	5.78e-06	4.9e-08	-5.73574	8.16494	-1.51668
ILMN_2112942	5.78e-06	4.92e-08	-5.73484	8.16076	-1.25161
ILMN_1809311	5.79e-06	4.95e-08	-5.7335	8.15455	-2.24474
ILMN_2066088	5.85e-06	5.03e-08	-5.73018	8.13918	-1.14382
ILMN_1705047	5.88e-06	5.08e-08	-5.72817	8.1299	-1.18118
ILMN_1676302	5.92e-06	5.14e-08	5.72594	8.11959	0.826804
ILMN_1663052	6.32e-06	5.51e-08	-5.71146	8.05272	-2.18815
ILMN_1654639	6.35e-06	5.56e-08	-5.70969	8.04453	-1.89979
ILMN_2120360	6.42e-06	5.66e-08	-5.70617	8.02832	-0.855932
ILMN_1728521	6.44e-06	5.74e-08	5.70315	8.0144	1.1937
ILMN_1652185	6.44e-06	5.75e-08	5.70277	8.01264	1.02013
ILMN_1775336	6.44e-06	5.75e-08	5.70271	8.01236	1.08024
ILMN_2080751	6.58e-06	5.92e-08	5.69682	7.9852	1.39283
ILMN_1713521	6.58e-06	5.93e-08	5.69657	7.98403	1.55709
ILMN_2110857	6.67e-06	6.04e-08	-5.69287	7.96699	-1.68284
ILMN_1675188	6.74e-06	6.14e-08	-5.68946	7.9513	-2.32208
ILMN_1733930	6.74e-06	6.16e-08	5.68872	7.94788	0.875268
ILMN_2349658	6.75e-06	6.19e-08	5.68771	7.94322	1.34672
ILMN_1784094	6.81e-06	6.28e-08	-5.68476	7.92966	-0.642721
ILMN_1814661	6.91e-06	6.4e-08	-5.68081	7.91148	-1.42107
ILMN_2367440	7.17e-06	6.66e-08	-5.6725	7.87331	-1.90399
ILMN_2215382	7.21e-06	6.73e-08	-5.67037	7.86349	-0.794251
ILMN_2356031	7.41e-06	6.96e-08	5.66351	7.832	1.03182
ILMN_2175455	7.41e-06	6.98e-08	-5.66295	7.82941	-1.46215
ILMN_2047511	7.68e-06	7.26e-08	5.6546	7.79112	0.881266
ILMN_1732150	7.76e-06	7.37e-08	5.65165	7.77762	1.26354
ILMN_2059797	7.83e-06	7.47e-08	5.64867	7.76394	1.04221
ILMN_1800898	7.84e-06	7.51e-08	-5.64773	7.75962	-0.989471
ILMN_1708130	8.05e-06	7.75e-08	5.64128	7.73006	2.05475
ILMN_1783336	8.05e-06	7.78e-08	-5.64043	7.7262	-1.50751
ILMN_2054928	8.18e-06	7.94e-08	-5.63621	7.70688	-1.01597
ILMN_2117809	8.43e-06	8.22e-08	-5.62901	7.67394	-0.858232
ILMN_2061435	8.65e-06	8.49e-08	5.62216	7.64263	1.36846
ILMN_2327346	8.65e-06	8.5e-08	5.62198	7.6418	1.74669
ILMN_1735180	8.74e-06	8.65e-08	5.61827	7.62486	1.10355
ILMN_2363668	8.74e-06	8.66e-08	5.61808	7.62402	1.21157
ILMN_1743753	8.85e-06	8.81e-08	5.61461	7.60816	0.989867
ILMN_1701881	8.88e-06	8.87e-08	-5.61312	7.60137	-1.14478
ILMN_1804663	8.93e-06	8.95e-08	5.61118	7.59251	0.900551
ILMN_1660114	8.97e-06	9.03e-08	-5.60936	7.58422	-1.69151
ILMN_1709167	9.13e-06	9.24e-08	-5.6047	7.56294	-1.18896
ILMN_1797005	9.16e-06	9.3e-08	5.60327	7.55641	1.37934
ILMN_1694273	9.16e-06	9.33e-08	-5.60254	7.55312	-1.38456
ILMN_2313330	9.73e-06	9.98e-08	5.58856	7.48944	0.908413
ILMN_1798874	9.73e-06	9.99e-08	5.58832	7.48834	1.17674
ILMN_1793302	9.84e-06	1.02e-07	5.58469	7.47181	1.24857
ILMN_1772370	9.84e-06	1.02e-07	5.58334	7.46567	0.992224
ILMN_1677505	9.84e-06	1.02e-07	-5.58301	7.46419	-2.01378
ILMN_1778321	9.84e-06	1.03e-07	5.58258	7.46223	1.43861
ILMN_2060268	9.87e-06	1.03e-07	-5.58122	7.45607	-1.12506
ILMN_1655961	9.97e-06	1.05e-07	5.57815	7.44208	1.10121
ILMN_1744887	1.01e-05	1.07e-07	-5.57485	7.42708	-1.2495
ILMN_2345015	1.01e-05	1.08e-07	5.57299	7.41864	1.05783
ILMN_1757350	1.01e-05	1.08e-07	5.57189	7.41363	1.05146
ILMN_1811574	1.01e-05	1.08e-07	5.57174	7.41297	1.5735
ILMN_1687149	1.01e-05	1.08e-07	5.57119	7.41048	1.5734
ILMN_1721623	1.01e-05	1.09e-07	5.57028	7.40634	0.914355
ILMN_1693598	1.01e-05	1.1e-07	5.56917	7.40128	1.23769
ILMN_2375992	1.01e-05	1.1e-07	5.56856	7.39851	1.68721
ILMN_2280911	1.01e-05	1.11e-07	5.56707	7.39176	1.18248
ILMN_1769912	1.01e-05	1.11e-07	-5.56598	7.3868	-1.31507
ILMN_2352097	1.01e-05	1.11e-07	5.56594	7.38664	1.56713
ILMN_1795495	1.01e-05	1.11e-07	5.56564	7.38528	0.998545
ILMN_1654545	1.01e-05	1.12e-07	5.56462	7.38064	0.99148
ILMN_1656016	1.04e-05	1.15e-07	5.55812	7.35117	1.27888
ILMN_1812618	1.04e-05	1.16e-07	5.55682	7.34528	0.858011
ILMN_1803939	1.06e-05	1.18e-07	5.55314	7.32859	1.09255
ILMN_2356574	1.1e-05	1.23e-07	5.54465	7.29015	0.971452
ILMN_1655068	1.1e-05	1.24e-07	5.54324	7.28374	1.40205
ILMN_2380839	1.11e-05	1.26e-07	5.53991	7.26867	1.07789
ILMN_1715569	1.11e-05	1.26e-07	5.53906	7.26483	1.7547
ILMN_1754312	1.11e-05	1.27e-07	-5.53845	7.26208	-2.00734
ILMN_1765605	1.11e-05	1.27e-07	-5.53789	7.25953	-1.77034
ILMN_1752226	1.12e-05	1.29e-07	5.53549	7.2487	1.24975
ILMN_1802104	1.13e-05	1.3e-07	-5.53333	7.23892	-1.43396
ILMN_1724902	1.15e-05	1.33e-07	-5.52851	7.21713	-1.48644
ILMN_1736954	1.15e-05	1.34e-07	5.52714	7.21092	1.23873
ILMN_1665691	1.15e-05	1.34e-07	-5.52692	7.20996	-1.225
ILMN_1700681	1.16e-05	1.35e-07	5.52483	7.20049	0.875766
ILMN_1724194	1.17e-05	1.37e-07	5.52158	7.18581	1.19383
ILMN_1699856	1.17e-05	1.38e-07	5.52122	7.1842	0.649964
ILMN_1670456	1.18e-05	1.39e-07	5.51856	7.17218	0.731298
ILMN_1753008	1.19e-05	1.4e-07	5.517	7.16517	1.34815
ILMN_2108735	1.21e-05	1.43e-07	5.51318	7.14791	2.88786
ILMN_1720083	1.25e-05	1.49e-07	5.5053	7.11242	1.04694
ILMN_1782247	1.25e-05	1.49e-07	5.50466	7.10952	1.25744
ILMN_2099259	1.27e-05	1.52e-07	-5.49986	7.08791	-1.64694
ILMN_1791820	1.28e-05	1.54e-07	5.49807	7.07983	0.708114
ILMN_2386008	1.31e-05	1.58e-07	5.49233	7.05399	1.54318
ILMN_1731478	1.31e-05	1.59e-07	-5.49093	7.04771	-0.958336
ILMN_1681772	1.36e-05	1.65e-07	-5.48285	7.01138	-0.795465
ILMN_1716298	1.38e-05	1.69e-07	-5.47836	6.99123	-1.07877
ILMN_1655713	1.38e-05	1.7e-07	-5.47658	6.98321	-0.487043
ILMN_1718129	1.38e-05	1.7e-07	5.47644	6.98261	1.27745
ILMN_1677564	1.38e-05	1.7e-07	-5.47637	6.98226	-1.21429
ILMN_1661589	1.38e-05	1.71e-07	5.4756	6.97884	1.33836
ILMN_1696485	1.39e-05	1.72e-07	5.47464	6.97453	1.11321
ILMN_1772677	1.4e-05	1.74e-07	5.47232	6.96409	1.02053
ILMN_1750088	1.42e-05	1.77e-07	5.46848	6.94687	0.856936
ILMN_1788895	1.45e-05	1.82e-07	-5.46262	6.92058	-0.978753
ILMN_2339863	1.47e-05	1.85e-07	5.45897	6.90426	1.37619
ILMN_1711596	1.49e-05	1.87e-07	5.45611	6.89143	1.15048
ILMN_1676984	1.49e-05	1.88e-07	5.45533	6.88793	1.43951
ILMN_2383975	1.49e-05	1.89e-07	5.45414	6.88262	1.49706
ILMN_1659029	1.51e-05	1.93e-07	5.45052	6.86641	1.27979
ILMN_1714000	1.53e-05	1.95e-07	-5.4475	6.85287	-0.547458
ILMN_1742324	1.55e-05	1.98e-07	5.44435	6.83881	1.28419
ILMN_1716469	1.56e-05	2e-07	-5.44193	6.82795	-0.679658
ILMN_1699570	1.59e-05	2.05e-07	5.43691	6.80554	0.780044
ILMN_1698020	1.64e-05	2.12e-07	5.4299	6.77421	0.751843
ILMN_1777982	1.68e-05	2.17e-07	5.42472	6.7511	0.735927
ILMN_1721540	1.68e-05	2.18e-07	-5.4237	6.74658	-0.768117
ILMN_1679960	1.7e-05	2.22e-07	-5.42049	6.73222	-1.02588
ILMN_1795025	1.7e-05	2.22e-07	5.41993	6.72976	1.13379
ILMN_1787808	1.7e-05	2.23e-07	5.41938	6.7273	0.768343
ILMN_1791545	1.72e-05	2.27e-07	5.41552	6.71008	2.28813
ILMN_1742618	1.72e-05	2.28e-07	5.41468	6.70633	0.926472
ILMN_1658017	1.72e-05	2.29e-07	-5.41396	6.70312	-0.803679
ILMN_1734794	1.72e-05	2.29e-07	-5.41382	6.70251	-1.16483
ILMN_1762466	1.74e-05	2.32e-07	5.41082	6.68916	0.87252
ILMN_1675335	1.82e-05	2.43e-07	-5.40065	6.64389	-0.843472
ILMN_2353110	1.83e-05	2.45e-07	-5.39903	6.63667	-0.799597
ILMN_1702866	1.86e-05	2.51e-07	-5.39431	6.6157	-1.28282
ILMN_1729180	1.89e-05	2.55e-07	-5.3905	6.59876	-1.51032
ILMN_1737157	1.93e-05	2.61e-07	5.38548	6.57648	0.847544
ILMN_1683204	1.96e-05	2.67e-07	5.38133	6.55804	1.1428
ILMN_1671516	2.09e-05	2.85e-07	5.36706	6.49477	0.887686
ILMN_1732053	2.13e-05	2.91e-07	5.36256	6.47486	0.767942
ILMN_1751378	2.2e-05	3.02e-07	5.35468	6.43998	0.877575
ILMN_1775327	2.23e-05	3.07e-07	5.35135	6.42525	0.871891
ILMN_1729533	2.27e-05	3.12e-07	5.34751	6.40831	0.99061
ILMN_1774742	2.38e-05	3.29e-07	-5.33613	6.35805	-1.59264
ILMN_2334121	2.38e-05	3.3e-07	5.33531	6.35442	0.884779
ILMN_2041577	2.38e-05	3.31e-07	5.33525	6.35416	1.37915
ILMN_2192620	2.39e-05	3.33e-07	5.33336	6.34581	1.10337
ILMN_1779855	2.39e-05	3.34e-07	-5.33304	6.34441	-2.53666
ILMN_1672547	2.39e-05	3.36e-07	5.33203	6.33997	1.2183
ILMN_1758750	2.43e-05	3.41e-07	5.32828	6.32344	0.957818
ILMN_2110281	2.43e-05	3.44e-07	5.32662	6.31613	1.70252
ILMN_2362545	2.43e-05	3.45e-07	5.32622	6.31437	1.22175
ILMN_2376625	2.43e-05	3.45e-07	5.32611	6.31386	0.952877
ILMN_2318685	2.5e-05	3.56e-07	5.31955	6.28496	1.02524
ILMN_1720266	2.5e-05	3.57e-07	5.31847	6.28022	1.02434
ILMN_1730628	2.53e-05	3.61e-07	-5.31606	6.26963	-0.633732
ILMN_2177090	2.55e-05	3.66e-07	5.31336	6.25773	0.728464
ILMN_1713884	2.63e-05	3.79e-07	5.30595	6.22517	0.931739
ILMN_2097997	2.68e-05	3.87e-07	-5.3015	6.20561	-1.41681
ILMN_1797693	2.69e-05	3.9e-07	5.29993	6.19872	0.881397
ILMN_2364357	2.69e-05	3.91e-07	5.29934	6.19609	0.738089
ILMN_2212823	2.72e-05	3.96e-07	-5.29652	6.18375	-1.17577
ILMN_1654566	2.77e-05	4.05e-07	-5.29164	6.1623	-1.13385
ILMN_1792955	2.77e-05	4.05e-07	5.29157	6.16203	1.73617
ILMN_1762464	2.84e-05	4.17e-07	-5.28508	6.13354	-1.62205
ILMN_1729123	2.89e-05	4.25e-07	5.28117	6.11644	0.724542
ILMN_1811823	2.89e-05	4.28e-07	5.27973	6.11011	2.10884
ILMN_1759219	2.89e-05	4.28e-07	-5.2795	6.10909	-1.31718
ILMN_2373666	2.89e-05	4.28e-07	-5.27948	6.10902	-1.33227
ILMN_2353327	2.91e-05	4.33e-07	-5.27717	6.09888	-1.32644
ILMN_1657972	3.05e-05	4.55e-07	-5.26621	6.05094	-1.02374
ILMN_1691409	3.06e-05	4.58e-07	5.26479	6.04476	0.834454
ILMN_1814022	3.06e-05	4.59e-07	5.26456	6.04375	0.661253
ILMN_2154115	3.08e-05	4.63e-07	5.26275	6.03582	1.88174
ILMN_1758093	3.12e-05	4.7e-07	5.25939	6.02116	1.23658
ILMN_2093231	3.22e-05	4.87e-07	5.25157	5.987	0.874281
ILMN_1776147	3.22e-05	4.88e-07	5.25103	5.98464	1.32208
ILMN_2209045	3.24e-05	4.93e-07	-5.24907	5.9761	-1.13788
ILMN_1687359	3.33e-05	5.07e-07	-5.24291	5.94923	-0.941443
ILMN_1655418	3.35e-05	5.13e-07	5.24045	5.9385	1.06728
ILMN_1765520	3.35e-05	5.13e-07	5.24043	5.93843	1.36266
ILMN_2407482	3.35e-05	5.15e-07	5.23962	5.9349	0.869809
ILMN_1718558	3.36e-05	5.18e-07	5.23834	5.92932	1.29454
ILMN_2083334	3.37e-05	5.21e-07	5.23699	5.92345	1.06413
ILMN_2271014	3.39e-05	5.25e-07	-5.23546	5.91678	-1.38682
ILMN_1785960	3.43e-05	5.32e-07	5.23244	5.90362	1.16036
ILMN_1717125	3.46e-05	5.41e-07	-5.22887	5.88808	-0.653622
ILMN_2357855	3.46e-05	5.41e-07	-5.22886	5.88804	-1.13813
ILMN_1799320	3.46e-05	5.41e-07	5.2288	5.8878	0.83474
ILMN_1789541	3.53e-05	5.54e-07	-5.22383	5.86617	-0.950308
ILMN_1679558	3.55e-05	5.58e-07	5.22193	5.85791	1.03581
ILMN_1727134	3.55e-05	5.6e-07	5.22127	5.85504	0.972601
ILMN_1677484	3.64e-05	5.77e-07	5.21469	5.82646	1.27169
ILMN_1720849	3.64e-05	5.79e-07	-5.21415	5.82409	-1.14596
ILMN_2284591	3.64e-05	5.8e-07	5.2138	5.82259	0.650857
ILMN_1778078	3.64e-05	5.8e-07	5.21356	5.82152	1.2693
ILMN_1726640	3.76e-05	6.01e-07	-5.20602	5.78881	-1.0569
ILMN_2297710	3.76e-05	6.02e-07	5.20556	5.78684	1.01519
ILMN_2127416	3.76e-05	6.05e-07	-5.20459	5.78263	-1.37851
ILMN_1656293	3.8e-05	6.12e-07	5.20184	5.77067	0.791729
ILMN_2377459	3.84e-05	6.19e-07	5.19938	5.76003	0.981724
ILMN_1696276	3.94e-05	6.38e-07	5.19307	5.73269	1.00014
ILMN_1785703	3.95e-05	6.41e-07	-5.19202	5.72816	-0.807454
ILMN_1745172	4e-05	6.5e-07	5.18884	5.71439	0.845463
ILMN_2165289	4e-05	6.53e-07	-5.18792	5.7104	-1.27885
ILMN_1687404	4.1e-05	6.7e-07	-5.1823	5.68611	-0.967015
ILMN_1770005	4.12e-05	6.75e-07	-5.18044	5.67807	-1.06368
ILMN_1706077	4.18e-05	6.87e-07	-5.17673	5.66201	-0.890212
ILMN_1681118	4.24e-05	6.99e-07	5.17303	5.64603	0.787216
ILMN_1770537	4.25e-05	7.02e-07	5.17209	5.64198	1.13777
ILMN_1744268	4.29e-05	7.1e-07	5.1695	5.63079	1.54368
ILMN_1752669	4.31e-05	7.17e-07	-5.16725	5.62107	-0.809491
ILMN_1785252	4.31e-05	7.18e-07	5.16708	5.62037	0.832634
ILMN_1715977	4.31e-05	7.19e-07	-5.16684	5.61932	-0.867304
ILMN_2406892	4.31e-05	7.21e-07	5.16626	5.6168	1.04478
ILMN_2211739	4.36e-05	7.3e-07	-5.16343	5.60462	-1.40139
ILMN_1722834	4.37e-05	7.34e-07	5.16231	5.59978	1.43051
ILMN_1728707	4.37e-05	7.36e-07	-5.16163	5.59683	-2.21271
ILMN_1760757	4.52e-05	7.63e-07	-5.15384	5.56326	-1.54967
ILMN_2211065	4.52e-05	7.66e-07	5.15298	5.55957	1.3817
ILMN_1659762	4.63e-05	7.86e-07	5.14714	5.53443	0.803201
ILMN_1723884	4.63e-05	7.87e-07	5.14705	5.53404	0.890386
ILMN_2178587	4.66e-05	7.94e-07	5.14501	5.52525	1.50307
ILMN_1669772	4.66e-05	7.96e-07	5.14452	5.52316	0.811936
ILMN_1745130	4.82e-05	8.25e-07	5.13645	5.48847	1.44592
ILMN_1655422	4.87e-05	8.36e-07	5.13364	5.47638	0.823602
ILMN_1651354	4.99e-05	8.59e-07	5.12765	5.45066	1.04236
ILMN_1785926	5.02e-05	8.65e-07	-5.1261	5.44403	-1.36639
ILMN_2410772	5.08e-05	8.8e-07	5.12237	5.428	0.845906
ILMN_1685810	5.08e-05	8.8e-07	5.12237	5.428	0.881885
ILMN_1692477	5.13e-05	8.9e-07	-5.11982	5.41708	-1.22125
ILMN_1765791	5.38e-05	9.37e-07	-5.10844	5.36833	-1.24511
ILMN_2307740	5.4e-05	9.42e-07	5.10741	5.36393	1.19245
ILMN_1772713	5.48e-05	9.58e-07	5.10367	5.34792	0.78859
ILMN_1782141	5.53e-05	9.69e-07	-5.10116	5.3372	-0.825029
ILMN_1754078	5.62e-05	9.88e-07	-5.09689	5.31895	-1.32808
ILMN_1662198	5.68e-05	1e-06	5.09403	5.30672	1.31191
ILMN_1662038	5.8e-05	1.02e-06	5.08893	5.28495	1.41544
ILMN_1701169	5.81e-05	1.03e-06	5.08811	5.28144	0.855776
ILMN_1669842	5.86e-05	1.04e-06	5.08566	5.27099	1.11283
ILMN_1706478	5.93e-05	1.05e-06	-5.08236	5.25691	-0.739763
ILMN_1692276	5.94e-05	1.06e-06	5.08128	5.25229	0.860501
ILMN_1810651	5.94e-05	1.06e-06	-5.08113	5.25166	-2.53657
ILMN_1813028	6e-05	1.07e-06	5.07845	5.24023	1.08168
ILMN_1659444	6.3e-05	1.13e-06	5.06696	5.19128	1.10478
ILMN_1758806	6.32e-05	1.14e-06	5.06566	5.18574	1.35796
ILMN_1690982	6.54e-05	1.18e-06	-5.0576	5.15148	-0.61061
ILMN_1737168	6.57e-05	1.19e-06	5.05575	5.14361	1.08108
ILMN_1737124	6.57e-05	1.19e-06	5.05548	5.14247	0.773503
ILMN_1756086	6.57e-05	1.19e-06	5.05522	5.14135	1.06984
ILMN_1677608	6.58e-05	1.2e-06	-5.0538	5.13531	-1.45801
ILMN_1676191	6.58e-05	1.2e-06	5.05369	5.13485	1.09163
ILMN_1672121	6.58e-05	1.2e-06	-5.05352	5.13412	-0.530704
ILMN_1798838	6.6e-05	1.21e-06	5.05217	5.12843	1.12309
ILMN_1702965	6.61e-05	1.22e-06	-5.05097	5.1233	-0.826762
ILMN_1672094	6.61e-05	1.22e-06	-5.05076	5.12242	-1.56221
ILMN_1728117	6.67e-05	1.23e-06	-5.04819	5.1115	-0.716283
ILMN_1676600	6.67e-05	1.23e-06	5.04746	5.10839	1.1653
ILMN_1680860	6.67e-05	1.23e-06	5.04735	5.10795	1.50062
ILMN_2106002	6.76e-05	1.25e-06	-5.0438	5.09287	-1.30925
ILMN_1747303	6.8e-05	1.26e-06	5.0422	5.08608	1.77772
ILMN_1765371	6.81e-05	1.27e-06	5.04082	5.08026	1.04428
ILMN_2354334	6.81e-05	1.27e-06	5.04076	5.08	0.88366
ILMN_1689111	6.82e-05	1.28e-06	-5.04007	5.07704	-1.34588
ILMN_1812777	6.83e-05	1.28e-06	5.03906	5.07277	0.794561
ILMN_1798485	6.83e-05	1.28e-06	5.03867	5.07111	1.03866
ILMN_1749639	6.89e-05	1.3e-06	5.03623	5.06079	1.43152
ILMN_2367469	6.93e-05	1.31e-06	5.03461	5.05393	0.996125
ILMN_1757378	6.98e-05	1.32e-06	5.03192	5.04253	1.1054
ILMN_2328813	6.98e-05	1.33e-06	5.03163	5.04132	0.777921
ILMN_2399503	6.98e-05	1.33e-06	5.03155	5.04094	0.603768
ILMN_1701213	7.02e-05	1.34e-06	5.02963	5.03285	0.75112
ILMN_1795341	7.06e-05	1.35e-06	5.0279	5.02549	0.830785
ILMN_1741491	7.11e-05	1.36e-06	5.02605	5.01766	0.993165
ILMN_1778444	7.11e-05	1.37e-06	-5.02501	5.01328	-0.801459
ILMN_1749838	7.11e-05	1.37e-06	5.02489	5.01278	1.66321
ILMN_2144426	7.24e-05	1.39e-06	5.02056	4.99446	1.53835
ILMN_1733615	7.24e-05	1.4e-06	5.02003	4.9922	1.0933
ILMN_1797384	7.29e-05	1.41e-06	5.01807	4.98391	1.27949
ILMN_2394750	7.33e-05	1.42e-06	5.01614	4.97579	1.09672
ILMN_1701967	7.43e-05	1.44e-06	5.01287	4.96197	1.15631
ILMN_2061419	7.73e-05	1.5e-06	-5.00338	4.92192	-1.63276
ILMN_1726512	7.75e-05	1.51e-06	5.00257	4.9185	1.1156
ILMN_2136615	7.76e-05	1.52e-06	-5.00155	4.91419	-0.889031
ILMN_1805730	7.92e-05	1.55e-06	-4.99654	4.89305	-1.35717
ILMN_2161015	7.92e-05	1.56e-06	-4.9959	4.8904	-1.26739
ILMN_1754757	7.92e-05	1.56e-06	4.9957	4.88952	0.822667
ILMN_1815480	7.95e-05	1.57e-06	-4.99406	4.88261	-2.27195
ILMN_1796490	7.95e-05	1.57e-06	4.99391	4.88199	1.15933
ILMN_1733511	8.05e-05	1.59e-06	4.99033	4.86691	0.780582
ILMN_2327090	8.05e-05	1.59e-06	4.99024	4.86653	1.08878
ILMN_1692973	8.26e-05	1.64e-06	-4.98395	4.84006	-1.132
ILMN_1768795	8.29e-05	1.65e-06	-4.9826	4.8344	-0.587753
ILMN_2166696	8.29e-05	1.65e-06	-4.98217	4.8326	-2.19627
ILMN_2390821	8.49e-05	1.7e-06	4.97649	4.80869	0.859289
ILMN_1707311	8.61e-05	1.72e-06	-4.97273	4.79292	-1.42994
ILMN_1762605	8.61e-05	1.73e-06	-4.97247	4.79181	-2.28477
ILMN_2234517	8.61e-05	1.73e-06	-4.97194	4.78959	-0.72291
ILMN_1801476	8.64e-05	1.74e-06	4.97067	4.78427	0.905554
ILMN_2383344	8.66e-05	1.75e-06	-4.96976	4.78046	-0.626061
ILMN_1767831	8.77e-05	1.77e-06	-4.96634	4.7661	-1.41553
ILMN_1789500	8.77e-05	1.78e-06	4.96586	4.76407	1.03671
ILMN_1677305	8.87e-05	1.8e-06	4.96298	4.75201	0.880928
ILMN_1697141	8.93e-05	1.82e-06	-4.96077	4.74273	-1.65634
ILMN_2333319	8.93e-05	1.82e-06	4.96051	4.74165	0.532288
ILMN_1805161	9.08e-05	1.86e-06	4.95625	4.7238	1.1504
ILMN_1786766	9.42e-05	1.93e-06	4.94773	4.68812	1.04446
ILMN_2245814	9.47e-05	1.94e-06	4.94576	4.67989	1.01163
ILMN_1795822	9.47e-05	1.95e-06	4.94545	4.67858	1.43367
ILMN_1728705	9.5e-05	1.96e-06	-4.94405	4.67275	-1.14188
ILMN_1753737	9.5e-05	1.97e-06	-4.94331	4.66965	-0.783585
ILMN_1663132	9.5e-05	1.97e-06	4.94327	4.66946	1.23908
ILMN_1773868	9.5e-05	1.97e-06	4.94309	4.66873	1.0273
ILMN_1775692	9.7e-05	2.01e-06	4.93779	4.64656	0.901932
ILMN_1813685	9.72e-05	2.02e-06	4.9368	4.64243	0.960697
ILMN_2079386	9.72e-05	2.03e-06	-4.93644	4.64093	-1.29619
ILMN_2332267	9.78e-05	2.04e-06	4.93478	4.63401	0.838894
ILMN_1696434	9.79e-05	2.05e-06	-4.9336	4.62908	-2.06817
ILMN_2156699	9.79e-05	2.05e-06	-4.93357	4.62895	-0.818049
ILMN_2151075	9.87e-05	2.08e-06	4.93081	4.61744	1.38627
ILMN_1727605	9.87e-05	2.08e-06	4.9308	4.61738	1.15722
ILMN_1723092	9.93e-05	2.09e-06	4.92902	4.60995	1.77207
ILMN_2130838	9.93e-05	2.1e-06	4.92858	4.60813	1.04799
ILMN_2399174	0.0001	2.12e-06	4.92596	4.5972	1.24829
ILMN_1807050	0.000102	2.17e-06	-4.92086	4.57591	-1.57596
ILMN_2222651	0.000102	2.17e-06	4.92053	4.57454	0.896514
ILMN_1703379	0.000103	2.2e-06	4.9181	4.5644	1.43271
ILMN_1651262	0.000104	2.21e-06	4.91676	4.55883	1.02945
ILMN_1806500	0.000104	2.22e-06	-4.91589	4.5552	-1.55753
ILMN_1702107	0.000104	2.23e-06	-4.91426	4.54841	-0.920796
ILMN_2185845	0.000105	2.25e-06	4.91261	4.54154	1.03834
ILMN_2396947	0.000106	2.27e-06	4.91034	4.53213	1.14147
ILMN_1704637	0.000106	2.28e-06	-4.91007	4.53097	-1.84511
ILMN_1715742	0.000106	2.29e-06	-4.90842	4.52412	-0.710307
ILMN_2354391	0.000107	2.32e-06	4.90618	4.51481	0.86351
ILMN_1700811	0.000108	2.33e-06	4.90485	4.50927	0.965948
ILMN_1780898	0.000108	2.34e-06	-4.90362	4.50414	-1.5268
ILMN_1806189	0.000108	2.35e-06	-4.90298	4.5015	-1.11375
ILMN_1806010	0.000108	2.35e-06	4.90244	4.49925	0.75191
ILMN_1787410	0.000109	2.38e-06	4.90024	4.4901	0.856904
ILMN_1706502	0.000109	2.39e-06	4.8989	4.48454	0.967061
ILMN_1798256	0.000109	2.4e-06	4.89853	4.48302	0.664984
ILMN_2412768	0.000109	2.4e-06	4.8981	4.48121	0.793404
ILMN_2122511	0.000109	2.4e-06	-4.89783	4.48012	-0.928977
ILMN_1722492	0.00011	2.43e-06	-4.89549	4.4704	-0.937738
ILMN_1716674	0.00011	2.43e-06	-4.89525	4.46939	-1.88772
ILMN_2390859	0.00011	2.43e-06	4.89513	4.46891	1.1197
ILMN_1771174	0.00011	2.44e-06	-4.89459	4.46663	-1.03546
ILMN_2295183	0.000111	2.45e-06	4.8933	4.46131	0.745097
ILMN_1812799	0.000112	2.48e-06	-4.89046	4.4495	-1.31818
ILMN_2410540	0.000113	2.52e-06	4.88746	4.43705	0.727653
ILMN_1694111	0.000113	2.52e-06	4.88734	4.43656	0.920153
ILMN_1769492	0.000114	2.54e-06	-4.88496	4.42671	-1.49815
ILMN_1687848	0.000115	2.57e-06	-4.88266	4.41717	-1.33279
ILMN_2317923	0.000115	2.58e-06	4.88194	4.41416	1.21587
ILMN_1725247	0.000115	2.58e-06	4.88192	4.4141	0.875954
ILMN_2393450	0.000115	2.59e-06	4.88098	4.41022	0.591457
ILMN_1730818	0.000116	2.62e-06	-4.87788	4.39734	-1.45359
ILMN_1713156	0.000117	2.65e-06	4.87578	4.38869	1.18551
ILMN_1705331	0.000118	2.67e-06	-4.87419	4.3821	-2.25526
ILMN_1808850	0.000119	2.7e-06	4.87158	4.37129	1.19788
ILMN_1812940	0.00012	2.72e-06	4.86967	4.3634	1.09044
ILMN_2369580	0.00012	2.72e-06	4.86967	4.36339	1.27878
ILMN_2203149	0.000125	2.85e-06	-4.85871	4.31808	-0.724119
ILMN_1766359	0.000125	2.86e-06	4.85808	4.31549	0.941577
ILMN_1719547	0.000125	2.86e-06	4.85794	4.31493	1.00722
ILMN_2412822	0.000125	2.87e-06	-4.85768	4.31383	-0.984519
ILMN_1716687	0.000125	2.88e-06	4.85635	4.30835	1.23278
ILMN_2189306	0.000125	2.88e-06	-4.85624	4.3079	-2.10933
ILMN_1674640	0.000128	2.96e-06	-4.85068	4.28495	-1.63204
ILMN_2375156	0.000128	2.96e-06	-4.8505	4.28421	-1.21784
ILMN_1747184	0.000128	2.96e-06	-4.85046	4.28403	-1.31617
ILMN_1670539	0.00013	3e-06	4.84706	4.27001	1.60154
ILMN_1812946	0.00013	3.01e-06	-4.84627	4.26678	-1.294
ILMN_1799387	0.000131	3.04e-06	4.84402	4.25751	0.696961
ILMN_1717195	0.000131	3.06e-06	-4.84267	4.25194	-0.993225
ILMN_2095078	0.000131	3.06e-06	-4.84243	4.25095	-0.773697
ILMN_1722330	0.000132	3.08e-06	-4.84119	4.24585	-1.23434
ILMN_1740407	0.000132	3.09e-06	-4.84044	4.24275	-1.01437
ILMN_2172507	0.000132	3.09e-06	-4.8403	4.2422	-1.30311
ILMN_1798577	0.000133	3.12e-06	-4.83831	4.23396	-1.73791
ILMN_2232177	0.000134	3.16e-06	4.83527	4.22149	0.4261
ILMN_1701724	0.000134	3.16e-06	4.83518	4.22112	1.37073
ILMN_1767657	0.000135	3.19e-06	-4.83308	4.21248	-1.10104
ILMN_2094313	0.000135	3.2e-06	4.83239	4.20963	1.28457
ILMN_1773620	0.000137	3.25e-06	4.82912	4.19619	1.14888
ILMN_1674386	0.000138	3.28e-06	4.8268	4.18665	2.47927
ILMN_1740094	0.000138	3.29e-06	-4.82632	4.18466	-1.46739
ILMN_1738116	0.000138	3.3e-06	4.82534	4.18065	1.66728
ILMN_1711579	0.000138	3.3e-06	-4.82523	4.18018	-1.0675
ILMN_1685052	0.000138	3.31e-06	4.82504	4.17942	1.47194
ILMN_1749297	0.00014	3.36e-06	4.82152	4.16495	0.998601
ILMN_1810978	0.00014	3.36e-06	-4.82107	4.1631	-1.85106
ILMN_2110206	0.00014	3.36e-06	-4.82104	4.16297	-1.18649
ILMN_2165867	0.000141	3.4e-06	-4.81877	4.15368	-1.1371
ILMN_2043816	0.000141	3.41e-06	4.81804	4.15068	1.30933
ILMN_2161330	0.000142	3.43e-06	-4.81654	4.14449	-1.79749
ILMN_1728498	0.000142	3.44e-06	4.81608	4.14262	1.10886
ILMN_1656540	0.000142	3.45e-06	4.81545	4.14006	0.809284
ILMN_2362982	0.000143	3.48e-06	4.81356	4.1323	1.2564
ILMN_1738383	0.000144	3.49e-06	4.81279	4.12912	0.916564
ILMN_1680967	0.000144	3.5e-06	4.81196	4.12575	1.14166
ILMN_2119535	0.000145	3.53e-06	4.81003	4.1178	1.131
ILMN_2360710	0.000145	3.54e-06	4.80957	4.11594	1.02107
ILMN_2125010	0.000145	3.54e-06	4.80948	4.11557	0.916097
ILMN_1703041	0.000145	3.54e-06	4.80919	4.11436	1.59883
ILMN_2287168	0.000145	3.55e-06	-4.80863	4.11208	-1.44722
ILMN_2395451	0.000146	3.6e-06	-4.80551	4.0993	-0.927539
ILMN_1681437	0.000147	3.62e-06	-4.80433	4.09445	-0.967424
ILMN_1765532	0.000148	3.64e-06	4.80291	4.08866	1.39671
ILMN_1674661	0.000148	3.65e-06	4.80229	4.0861	1.33476
ILMN_1719316	0.000148	3.66e-06	4.80159	4.08325	0.634336
ILMN_1772123	0.000148	3.68e-06	4.80067	4.07948	1.1757
ILMN_2094416	0.000148	3.69e-06	-4.80013	4.07728	-1.60632
ILMN_1686781	0.000148	3.69e-06	-4.80006	4.07697	-0.699781
ILMN_2399827	0.000148	3.69e-06	4.79981	4.07598	1.35631
ILMN_2297096	0.000149	3.73e-06	-4.79749	4.06647	-1.38708
ILMN_2070102	0.000153	3.83e-06	-4.79142	4.04163	-1.22958
ILMN_2386354	0.000153	3.84e-06	4.79076	4.03896	0.714543
ILMN_2311674	0.000154	3.86e-06	4.7893	4.03299	1.04234
ILMN_1679021	0.000156	3.92e-06	4.78575	4.01847	1.40711
ILMN_2125590	0.000157	3.94e-06	-4.78454	4.01354	-1.04253
ILMN_1753482	0.000157	3.96e-06	-4.78338	4.00882	-1.17244
ILMN_2383484	0.000158	3.99e-06	4.78205	4.00339	0.869463
ILMN_2401352	0.000158	3.99e-06	4.78162	4.0016	1.71278
ILMN_1748093	0.000158	4e-06	4.78104	3.99927	1.28406
ILMN_1775566	0.000159	4.03e-06	4.77981	3.99423	1.09322
ILMN_1670130	0.000159	4.05e-06	4.77863	3.98943	1.29136
ILMN_1690329	0.000161	4.09e-06	-4.77613	3.97921	-1.2404
ILMN_1722554	0.000161	4.1e-06	-4.77567	3.97736	-1.51784
ILMN_1685170	0.000161	4.11e-06	4.77529	3.9758	0.533871
ILMN_1727800	0.000162	4.15e-06	-4.77278	3.96558	-0.816068
ILMN_2110829	0.000162	4.15e-06	-4.77271	3.96528	-0.52839
ILMN_2149204	0.000163	4.17e-06	-4.7718	3.96158	-0.693155
ILMN_1760683	0.000165	4.23e-06	4.76811	3.94652	1.08053
ILMN_1711091	0.000165	4.24e-06	4.76809	3.94644	1.17875
ILMN_1799598	0.000165	4.26e-06	4.76661	3.94045	0.801115
ILMN_1690545	0.000167	4.3e-06	-4.7644	3.93143	-1.1452
ILMN_1773238	0.000168	4.34e-06	-4.76227	3.92276	-1.55848
ILMN_1678791	0.000168	4.35e-06	-4.76177	3.92073	-1.19503
ILMN_2348512	0.000168	4.37e-06	4.76111	3.91805	0.696054
ILMN_2347380	0.000169	4.39e-06	4.75999	3.91348	0.714298
ILMN_2377025	0.000169	4.4e-06	4.75913	3.90998	0.918989
ILMN_1739283	0.000169	4.41e-06	4.75859	3.90779	0.940218
ILMN_2270491	0.00017	4.44e-06	-4.75694	3.9011	-0.506097
ILMN_1688317	0.000174	4.54e-06	4.75183	3.88033	1.18185
ILMN_2317580	0.000176	4.59e-06	-4.74925	3.86983	-1.26729
ILMN_1799814	0.000177	4.64e-06	4.7469	3.86029	1.31943
ILMN_1768127	0.000177	4.65e-06	4.74633	3.85798	1.27117
ILMN_1673384	0.000177	4.66e-06	-4.74584	3.85601	-1.13225
ILMN_1708778	0.000179	4.72e-06	-4.74322	3.84536	-1.223
ILMN_1782488	0.00018	4.74e-06	4.74184	3.83975	0.680945
ILMN_1690136	0.00018	4.75e-06	4.74156	3.83864	0.57674
ILMN_1803412	0.00018	4.76e-06	4.74085	3.83576	0.977532
ILMN_1812327	0.000181	4.79e-06	4.73947	3.83014	1.5307
ILMN_2374449	0.000181	4.8e-06	4.73935	3.82965	1.19411
ILMN_1803018	0.000181	4.8e-06	4.73912	3.82872	0.762558
ILMN_1663145	0.000181	4.83e-06	4.73787	3.82368	1.24788
ILMN_2305112	0.000182	4.85e-06	-4.73674	3.81908	-1.33201
ILMN_1761921	0.000182	4.86e-06	-4.73632	3.81737	-0.96547
ILMN_1806017	0.000182	4.86e-06	4.73621	3.81695	0.972435
ILMN_1677636	0.000182	4.88e-06	4.73537	3.81354	1.76873
ILMN_1670816	0.000182	4.9e-06	4.73449	3.80996	0.620621
ILMN_1678998	0.000182	4.9e-06	4.73444	3.80979	1.07142
ILMN_2041971	0.000183	4.94e-06	-4.73264	3.80248	-0.614905
ILMN_2274586	0.000184	4.96e-06	-4.73155	3.79806	-1.50576
ILMN_2335072	0.000184	4.96e-06	4.73152	3.79793	0.993275
ILMN_1724300	0.000184	4.98e-06	-4.73051	3.79384	-0.675131
ILMN_2085760	0.000184	4.99e-06	4.72997	3.79166	1.18263
ILMN_1699603	0.000186	5.03e-06	4.72814	3.78427	1.62661
ILMN_1717490	0.000186	5.06e-06	4.72689	3.77922	0.940706
ILMN_1688295	0.000186	5.07e-06	4.72641	3.77727	0.97012
ILMN_1660718	0.000187	5.09e-06	-4.7253	3.77278	-1.48012
ILMN_1801869	0.000187	5.1e-06	4.72526	3.77259	0.940982
ILMN_2197647	0.000189	5.16e-06	-4.72212	3.7599	-1.42485
ILMN_1686250	0.000189	5.17e-06	-4.72206	3.75966	-0.586577
ILMN_2116366	0.000189	5.17e-06	-4.72174	3.75838	-1.09312
ILMN_2225318	0.000189	5.18e-06	4.72122	3.75627	0.662166
ILMN_2281089	0.000195	5.37e-06	-4.7131	3.72346	-0.972935
ILMN_1792710	0.000198	5.44e-06	4.70997	3.71081	1.03155
ILMN_1663793	0.000199	5.49e-06	-4.70779	3.70204	-1.84371
ILMN_1663447	0.0002	5.51e-06	-4.70705	3.69903	-1.51418
ILMN_1753016	0.000201	5.55e-06	4.70535	3.6922	1.12413
ILMN_1699843	0.000202	5.59e-06	-4.70368	3.68547	-1.02358
ILMN_1673962	0.000202	5.6e-06	4.70308	3.68302	0.875007
ILMN_1770682	0.000202	5.61e-06	4.7027	3.68151	0.763812
ILMN_1681634	0.000203	5.65e-06	-4.70125	3.67565	-2.02666
ILMN_1692486	0.000206	5.73e-06	4.69794	3.66234	1.0766
ILMN_2311779	0.000206	5.75e-06	4.69721	3.65937	1.08446
ILMN_1676745	0.000207	5.79e-06	4.69561	3.65295	0.657378
ILMN_1717990	0.000207	5.81e-06	4.69476	3.64953	0.93896
ILMN_1734655	0.000207	5.81e-06	-4.69475	3.6495	-1.12566
ILMN_1675982	0.000208	5.84e-06	4.69358	3.64475	0.913177
ILMN_2135456	0.000208	5.84e-06	-4.69354	3.6446	-1.73282
ILMN_2090004	0.00021	5.92e-06	-4.69036	3.63179	-1.76891
ILMN_2396691	0.00021	5.92e-06	4.69032	3.63166	0.842012
ILMN_1747195	0.00021	5.94e-06	4.68968	3.62909	0.642496
ILMN_2269564	0.000213	6.01e-06	4.68676	3.61732	0.49209
ILMN_1662961	0.000213	6.01e-06	-4.68666	3.61694	-1.61169
ILMN_1671158	0.000213	6.05e-06	4.68539	3.61181	0.679441
ILMN_1806647	0.000213	6.06e-06	4.68492	3.60991	0.961238
ILMN_1717557	0.000214	6.08e-06	-4.68409	3.6066	-1.56752
ILMN_2203729	0.000215	6.13e-06	-4.68225	3.59922	-0.5639
ILMN_1694080	0.000217	6.18e-06	-4.6801	3.59055	-0.79721
ILMN_2082810	0.000217	6.2e-06	4.67934	3.58752	1.03534
ILMN_1660723	0.000217	6.21e-06	4.67915	3.58677	1.98057
ILMN_2194852	0.000217	6.22e-06	-4.67889	3.5857	-0.718014
ILMN_2278590	0.000217	6.22e-06	4.67862	3.5846	1.16771
ILMN_1679382	0.000217	6.24e-06	4.67807	3.5824	0.457218
ILMN_2197846	0.000218	6.28e-06	4.67663	3.57661	0.765241
ILMN_2242463	0.000221	6.35e-06	4.67385	3.56548	1.09752
ILMN_1741148	0.000225	6.47e-06	4.66943	3.54773	1.51006
ILMN_2278636	0.000225	6.5e-06	4.66855	3.54422	1.24917
ILMN_2079042	0.000226	6.53e-06	-4.66722	3.53887	-1.48418
ILMN_1736180	0.000227	6.58e-06	-4.66554	3.53215	-1.09365
ILMN_1691364	0.000228	6.61e-06	4.66465	3.52858	0.777384
ILMN_2325008	0.000229	6.65e-06	4.66326	3.52302	0.924905
ILMN_2177965	0.00023	6.69e-06	4.66153	3.51607	1.36901
ILMN_1685433	0.000231	6.73e-06	4.66035	3.51135	1.3307
ILMN_1721084	0.000231	6.73e-06	-4.66024	3.51091	-0.634007
ILMN_1755383	0.000234	6.83e-06	4.65693	3.49766	1.00934
ILMN_1705261	0.000234	6.85e-06	4.65601	3.49398	0.583829
ILMN_1801454	0.000235	6.87e-06	-4.65537	3.49143	-0.870299
ILMN_1743046	0.000235	6.9e-06	-4.6544	3.48755	-0.62154
ILMN_1757882	0.000235	6.91e-06	4.65407	3.48624	0.782346
ILMN_1677567	0.000237	6.96e-06	-4.65233	3.47928	-0.641869
ILMN_1690993	0.000239	7.04e-06	-4.64973	3.46885	-2.02179
ILMN_2342174	0.000239	7.05e-06	-4.64922	3.46683	-1.00967
ILMN_2182198	0.00024	7.09e-06	4.64801	3.46199	0.918265
ILMN_1661554	0.00024	7.1e-06	4.64785	3.46138	0.753126
ILMN_2336146	0.00024	7.12e-06	-4.64708	3.4583	-0.780937
ILMN_1762713	0.00024	7.12e-06	-4.64697	3.45786	-0.761934
ILMN_2130078	0.00024	7.14e-06	-4.64648	3.45587	-1.17963
ILMN_1670872	0.000242	7.2e-06	-4.64442	3.44764	-0.741263
ILMN_1811933	0.000242	7.21e-06	-4.64418	3.44669	-1.22919
ILMN_2385097	0.000242	7.23e-06	4.64358	3.4443	0.630757
ILMN_1653459	0.000245	7.32e-06	-4.64056	3.43223	-0.773202
ILMN_2209578	0.000245	7.33e-06	4.64028	3.43114	1.36468
ILMN_1690077	0.000245	7.34e-06	4.63985	3.4294	0.87301
ILMN_2129102	0.000246	7.37e-06	-4.6388	3.42522	-1.09033
ILMN_1760732	0.000249	7.46e-06	-4.63604	3.41422	-1.07553
ILMN_1715574	0.000249	7.48e-06	4.6353	3.41127	1.06796
ILMN_2053334	0.00025	7.54e-06	-4.6337	3.40487	-0.825403
ILMN_1736021	0.000252	7.59e-06	4.63216	3.39875	1.28186
ILMN_1695790	0.000254	7.65e-06	4.63017	3.3908	0.648408
ILMN_1743770	0.000254	7.68e-06	4.62912	3.38662	0.873344
ILMN_1730625	0.000254	7.71e-06	-4.62837	3.38364	-1.09945
ILMN_2161910	0.000254	7.71e-06	-4.62821	3.38299	-0.717116
ILMN_1682795	0.000254	7.71e-06	-4.62819	3.38294	-0.884116
ILMN_2260392	0.000254	7.72e-06	4.62801	3.38222	0.86712
ILMN_1661596	0.000254	7.72e-06	4.62791	3.38179	0.609716
ILMN_1698953	0.000254	7.75e-06	-4.62719	3.37893	-1.38921
ILMN_1769926	0.000254	7.75e-06	4.62718	3.37892	0.619239
ILMN_1761797	0.000257	7.85e-06	4.62416	3.36689	0.923654
ILMN_1677239	0.000257	7.87e-06	4.62349	3.36423	1.32144
ILMN_2400940	0.000261	7.99e-06	4.61989	3.3499	1.20034
ILMN_1798046	0.000262	8.04e-06	-4.61835	3.34378	-1.3728
ILMN_2385688	0.000262	8.05e-06	4.61824	3.34334	1.0751
ILMN_1659982	0.000263	8.1e-06	-4.61666	3.33705	-2.0821
ILMN_1738263	0.000263	8.12e-06	4.61624	3.33538	0.80975
ILMN_2357334	0.000263	8.12e-06	-4.61613	3.33493	-1.50206
ILMN_1795419	0.000264	8.14e-06	4.61545	3.33225	0.87014
ILMN_1691584	0.000265	8.18e-06	-4.6143	3.32764	-1.75888
ILMN_1660793	0.000269	8.32e-06	4.61028	3.31168	1.31144
ILMN_1714650	0.000269	8.33e-06	-4.61018	3.31129	-0.858031
ILMN_1730645	0.00027	8.39e-06	-4.60824	3.3036	-2.15994
ILMN_1806733	0.00027	8.4e-06	4.60797	3.30253	1.04548
ILMN_1811599	0.000272	8.46e-06	-4.60628	3.29581	-1.42886
ILMN_1749415	0.000276	8.6e-06	-4.60247	3.28069	-0.464611
ILMN_1807970	0.000278	8.67e-06	-4.60072	3.27376	-1.37659
ILMN_2085933	0.000279	8.72e-06	-4.59913	3.26746	-0.864138
ILMN_1813775	0.000281	8.77e-06	4.5978	3.26219	1.00832
ILMN_1677376	0.000281	8.79e-06	4.59746	3.26085	1.3523
ILMN_1655644	0.000281	8.8e-06	-4.59702	3.25907	-1.08886
ILMN_1780560	0.000281	8.81e-06	4.59668	3.25775	1.16552
ILMN_1732035	0.000286	8.99e-06	-4.59192	3.23889	-1.63196
ILMN_2325194	0.000288	9.07e-06	4.58999	3.23124	0.858943
ILMN_2126802	0.000288	9.08e-06	-4.58971	3.23014	-0.879675
ILMN_1809491	0.000288	9.09e-06	-4.5895	3.22932	-0.695013
ILMN_2382500	0.000289	9.14e-06	-4.58818	3.22406	-0.698812
ILMN_2395926	0.000289	9.14e-06	4.58811	3.2238	0.608967
ILMN_1720485	0.000289	9.15e-06	-4.58793	3.22308	-0.465122
ILMN_1745374	0.00029	9.2e-06	4.58647	3.2173	0.648336
ILMN_2378555	0.000291	9.23e-06	-4.58578	3.21457	-0.909453
ILMN_1668946	0.000291	9.25e-06	4.58523	3.21242	1.69793
ILMN_1678404	0.000294	9.37e-06	4.58223	3.20055	0.81482
ILMN_2193213	0.000296	9.44e-06	-4.58048	3.19362	-1.50325
ILMN_2412101	0.0003	9.57e-06	4.57717	3.18053	0.928549
ILMN_2324672	0.000302	9.65e-06	4.57526	3.17298	1.00047
ILMN_2248093	0.000302	9.66e-06	-4.57507	3.17227	-1.41542
ILMN_1796678	0.000303	9.71e-06	-4.57368	3.16676	-1.05594
ILMN_2064150	0.000308	9.89e-06	4.56942	3.14996	1.10821
ILMN_1756935	0.000313	1.01e-05	-4.56515	3.1331	-1.34027
ILMN_1795678	0.000314	1.01e-05	4.56444	3.13032	1.16689
ILMN_1715401	0.000319	1.03e-05	-4.56029	3.11398	-1.64799
ILMN_1763264	0.00032	1.03e-05	4.55946	3.1107	0.675543
ILMN_1735712	0.00032	1.03e-05	-4.55868	3.10763	-1.02704
ILMN_2359698	0.00032	1.03e-05	-4.55867	3.10757	-0.896219
ILMN_1711009	0.000321	1.04e-05	4.55763	3.10349	1.65011
ILMN_1714820	0.000322	1.04e-05	4.5567	3.0998	0.981857
ILMN_2323774	0.000322	1.05e-05	4.55591	3.0967	1.38219
ILMN_2402131	0.000323	1.05e-05	4.55546	3.09495	0.724585
ILMN_1686664	0.000323	1.05e-05	-4.55514	3.09369	-1.98568
ILMN_1796244	0.000323	1.05e-05	4.55418	3.0899	1.03906
ILMN_1689342	0.000323	1.05e-05	4.55414	3.08976	1.05934
ILMN_1753182	0.000324	1.06e-05	-4.55301	3.08532	-1.8634
ILMN_1683096	0.000325	1.06e-05	4.55227	3.08238	0.778547
ILMN_1803871	0.000327	1.07e-05	-4.55057	3.07571	-1.14603
ILMN_2116127	0.000327	1.07e-05	4.55	3.07346	0.735891
ILMN_1731788	0.000329	1.08e-05	-4.54834	3.06693	-1.36667
ILMN_1696131	0.000329	1.08e-05	-4.54787	3.0651	-0.68671
ILMN_2097358	0.00033	1.09e-05	-4.54726	3.06269	-0.509883
ILMN_2082903	0.00033	1.09e-05	-4.54672	3.06057	-0.549152
ILMN_1671966	0.00033	1.09e-05	-4.54659	3.06006	-0.794359
ILMN_2247360	0.000334	1.1e-05	4.54369	3.04866	0.864773
ILMN_1692754	0.000335	1.11e-05	4.54269	3.04474	1.66989
ILMN_1657045	0.000336	1.11e-05	4.54147	3.03995	0.886891
ILMN_2275742	0.000336	1.11e-05	-4.54111	3.03853	-0.823526
ILMN_1686985	0.000336	1.11e-05	-4.54107	3.03836	-0.721547
ILMN_1790706	0.000337	1.12e-05	-4.53994	3.03395	-0.756216
ILMN_2278152	0.000338	1.12e-05	4.53888	3.02977	0.967073
ILMN_1747318	0.00034	1.13e-05	4.53713	3.02292	0.771187
ILMN_1783682	0.000341	1.14e-05	4.53616	3.01909	0.860487
ILMN_1717565	0.000343	1.14e-05	-4.53464	3.01316	-1.43513
ILMN_1702211	0.000343	1.15e-05	4.53411	3.01106	0.883571
ILMN_1765986	0.000344	1.15e-05	-4.53335	3.00807	-0.636266
ILMN_1716026	0.00035	1.17e-05	4.52867	2.98973	0.943704
ILMN_1718619	0.00035	1.18e-05	4.52807	2.9874	0.624019
ILMN_1792094	0.000354	1.19e-05	-4.52542	2.97699	-0.803074
ILMN_1787379	0.000355	1.19e-05	-4.52455	2.97361	-0.701719
ILMN_1737992	0.000357	1.2e-05	-4.52293	2.96725	-1.5734
ILMN_1766551	0.000359	1.21e-05	-4.52082	2.95899	-0.760345
ILMN_1714352	0.000359	1.22e-05	4.52009	2.95615	0.817708
ILMN_1793630	0.000359	1.22e-05	4.52	2.95578	1.21224
ILMN_2248912	0.000359	1.22e-05	-4.51996	2.95565	-1.17616
ILMN_1811954	0.000363	1.23e-05	-4.51728	2.94514	-0.498151
ILMN_1714296	0.000363	1.23e-05	4.51686	2.9435	1.50539
ILMN_1774722	0.000364	1.24e-05	-4.51593	2.93986	-0.824666
ILMN_2116661	0.000365	1.24e-05	4.51482	2.93554	0.724304
ILMN_1787275	0.000368	1.25e-05	4.51301	2.92845	1.04431
ILMN_1764061	0.000368	1.25e-05	-4.51265	2.92704	-1.86102
ILMN_1776846	0.000369	1.26e-05	-4.51107	2.92087	-0.677749
ILMN_1674460	0.000369	1.26e-05	-4.51096	2.92047	-2.00703
ILMN_1670343	0.000369	1.26e-05	-4.51088	2.92015	-0.584852
ILMN_1784608	0.000372	1.27e-05	-4.50913	2.9133	-0.732786
ILMN_1770719	0.000373	1.28e-05	4.50785	2.9083	1.63801
ILMN_1711573	0.000373	1.28e-05	-4.50728	2.90609	-1.11412
ILMN_1781884	0.000373	1.28e-05	-4.50726	2.906	-0.753396
ILMN_1744398	0.000373	1.28e-05	-4.50705	2.90518	-1.35155
ILMN_1740671	0.000377	1.3e-05	-4.50417	2.89395	-0.901631
ILMN_1678627	0.000377	1.3e-05	-4.50375	2.89228	-1.12637
ILMN_1788160	0.000378	1.3e-05	4.50329	2.89052	1.10855
ILMN_2392274	0.00038	1.31e-05	4.50165	2.8841	1.38551
ILMN_1815093	0.000386	1.34e-05	-4.49727	2.86705	-1.4633
ILMN_1724994	0.000386	1.34e-05	4.49714	2.86652	0.894639
ILMN_2140910	0.000386	1.34e-05	-4.49711	2.86642	-0.829434
ILMN_1777725	0.000387	1.34e-05	4.49607	2.86235	0.903453
ILMN_1684352	0.000387	1.35e-05	4.4956	2.86051	1.40767
ILMN_1789103	0.000387	1.35e-05	4.49513	2.8587	0.899738
ILMN_1661173	0.000395	1.38e-05	4.49009	2.83907	0.966218
ILMN_1675172	0.000398	1.39e-05	-4.48819	2.83166	-1.72039
ILMN_1781983	0.000398	1.39e-05	4.4876	2.82936	0.912825
ILMN_1740216	0.000401	1.4e-05	4.48549	2.82116	0.818878
ILMN_1785427	0.000405	1.42e-05	-4.48309	2.81184	-1.16912
ILMN_1812433	0.000405	1.42e-05	-4.48298	2.81141	-1.86297
ILMN_1800619	0.000405	1.42e-05	4.48265	2.81013	1.16484
ILMN_2341952	0.000406	1.43e-05	4.48148	2.80557	1.00003
ILMN_1677018	0.000407	1.43e-05	-4.481	2.80372	-1.36392
ILMN_1667476	0.000407	1.43e-05	4.48066	2.80239	1.54458
ILMN_1746128	0.000407	1.44e-05	-4.47998	2.79974	-1.94153
ILMN_1699469	0.000408	1.44e-05	-4.47914	2.79648	-0.355164
ILMN_2383058	0.000409	1.45e-05	-4.47855	2.79417	-0.93154
ILMN_1784578	0.000409	1.45e-05	4.47842	2.79368	1.13309
ILMN_1809173	0.000412	1.46e-05	-4.47593	2.78401	-1.76546
ILMN_2258689	0.000412	1.46e-05	-4.47535	2.78176	-1.05202
ILMN_1706304	0.000412	1.46e-05	4.4753	2.78156	0.90559
ILMN_1674975	0.000421	1.5e-05	-4.47019	2.76174	-0.881656
ILMN_2168866	0.000421	1.5e-05	4.46975	2.76003	1.27633
ILMN_1787658	0.000423	1.51e-05	-4.4686	2.75556	-0.802321
ILMN_1749324	0.000427	1.52e-05	-4.46572	2.7444	-0.896536
ILMN_1680110	0.000427	1.53e-05	-4.46543	2.74326	-0.714297
ILMN_1754913	0.000428	1.53e-05	-4.46437	2.73915	-0.944696
ILMN_1700432	0.000428	1.53e-05	-4.4643	2.73889	-1.47593
ILMN_1677439	0.000431	1.54e-05	-4.46253	2.73203	-0.636014
ILMN_1774027	0.000431	1.55e-05	4.46207	2.73026	0.810389
ILMN_1809866	0.000434	1.56e-05	4.46015	2.72281	1.01198
ILMN_2251452	0.000434	1.56e-05	4.45989	2.7218	1.32254
ILMN_1714478	0.000434	1.56e-05	-4.45984	2.7216	-0.706465
ILMN_1808712	0.000434	1.56e-05	4.45968	2.721	0.876602
ILMN_1789830	0.000434	1.57e-05	4.45903	2.71846	0.621985
ILMN_2157020	0.000436	1.58e-05	-4.45773	2.71344	-1.03938
ILMN_1705711	0.000437	1.58e-05	4.45681	2.70988	1.16362
ILMN_2180232	0.000439	1.59e-05	-4.45548	2.70473	-1.00206
ILMN_2198912	0.00044	1.6e-05	-4.45468	2.70166	-3.24369
ILMN_1791388	0.000443	1.61e-05	4.45308	2.69543	0.721111
ILMN_2277099	0.000443	1.61e-05	4.45225	2.69225	0.931709
ILMN_1758623	0.000443	1.61e-05	4.45204	2.69142	0.933873
ILMN_1731529	0.000445	1.62e-05	-4.45089	2.68696	-1.4579
ILMN_1692342	0.000453	1.65e-05	4.44644	2.66976	1.61164
ILMN_1677684	0.000453	1.65e-05	-4.44631	2.66926	-0.629712
ILMN_1723443	0.000455	1.66e-05	-4.44491	2.66387	-1.06959
ILMN_1727756	0.000466	1.71e-05	-4.43848	2.63904	-1.53893
ILMN_1652754	0.000466	1.71e-05	4.43842	2.63883	0.943054
ILMN_1690754	0.000469	1.72e-05	4.43641	2.63105	0.925118
ILMN_1798681	0.00047	1.72e-05	-4.43589	2.62906	-0.463869
ILMN_1774344	0.000471	1.73e-05	-4.435	2.62562	-0.816234
ILMN_1729827	0.000478	1.76e-05	4.43092	2.60988	0.73911
ILMN_1708414	0.000479	1.76e-05	4.43058	2.6086	0.834564
ILMN_1702120	0.000482	1.77e-05	-4.42884	2.60188	-1.4808
ILMN_1691570	0.000483	1.78e-05	4.42753	2.59683	0.882018
ILMN_1799062	0.000483	1.79e-05	4.42742	2.59639	1.22748
ILMN_1690523	0.000485	1.79e-05	4.42642	2.59254	1.19705
ILMN_1767414	0.000485	1.8e-05	-4.42583	2.59027	-1.63506
ILMN_1676822	0.000486	1.8e-05	-4.42537	2.58851	-1.0898
ILMN_1652412	0.000487	1.81e-05	4.42449	2.58514	0.733824
ILMN_2324734	0.000488	1.81e-05	-4.4236	2.58171	-1.62082
ILMN_2179022	0.000488	1.82e-05	-4.42328	2.58047	-1.19306
ILMN_1684964	0.000489	1.82e-05	4.42263	2.57796	0.789949
ILMN_1772455	0.000493	1.84e-05	4.4205	2.56977	0.93531
ILMN_1731783	0.000494	1.84e-05	4.41971	2.56672	1.04175
ILMN_1656364	0.000497	1.86e-05	-4.41779	2.55938	-1.69779
ILMN_1798957	0.000498	1.86e-05	4.4172	2.55708	1.18162
ILMN_1749131	0.000499	1.87e-05	-4.41624	2.55342	-0.655601
ILMN_2232854	0.000501	1.88e-05	4.41513	2.54913	2.28211
ILMN_2401964	0.000501	1.88e-05	4.41507	2.54891	0.576682
ILMN_1684391	0.000501	1.88e-05	4.4147	2.54749	0.938193
ILMN_1760449	0.000502	1.89e-05	-4.41414	2.54533	-1.04736
ILMN_2093720	0.000506	1.91e-05	4.41161	2.53562	1.21046
ILMN_1775677	0.000506	1.91e-05	4.41141	2.53485	1.18091
ILMN_1707881	0.000508	1.92e-05	-4.41028	2.53049	-0.967219
ILMN_1792744	0.000509	1.92e-05	-4.40933	2.52687	-2.09462
ILMN_2361104	0.000511	1.93e-05	-4.40816	2.52237	-0.578197
ILMN_1796475	0.000517	1.96e-05	-4.40529	2.51133	-1.43098
ILMN_2078724	0.000519	1.97e-05	-4.40393	2.50613	-1.27252
ILMN_1698846	0.00052	1.97e-05	-4.40317	2.50322	-1.27912
ILMN_2406656	0.000523	1.99e-05	-4.40144	2.49657	-1.69301
ILMN_1797332	0.000524	1.99e-05	4.40038	2.49251	0.770129
ILMN_2192032	0.000524	2e-05	4.40034	2.49239	0.776378
ILMN_1802380	0.000525	2e-05	-4.3998	2.49029	-1.1895
ILMN_2354191	0.000527	2.01e-05	-4.3986	2.48569	-2.1007
ILMN_2066151	0.000527	2.01e-05	-4.39828	2.48448	-1.65457
ILMN_1736238	0.000533	2.04e-05	-4.39526	2.47292	-0.912157
ILMN_1772091	0.000536	2.05e-05	4.39384	2.46746	0.678043
ILMN_1714446	0.000538	2.06e-05	-4.39256	2.46256	-2.1381
ILMN_2140389	0.00054	2.07e-05	4.39151	2.45856	0.809744
ILMN_1737847	0.00054	2.08e-05	4.39062	2.45514	0.912826
ILMN_1689874	0.00054	2.08e-05	4.3905	2.45469	0.984384
ILMN_2163324	0.00054	2.08e-05	-4.39022	2.45363	-0.945938
ILMN_1669066	0.00054	2.08e-05	-4.39022	2.45362	-1.18833
ILMN_1685547	0.000541	2.08e-05	-4.38976	2.45187	-1.43264
ILMN_1671263	0.000544	2.1e-05	4.38788	2.44469	1.33448
ILMN_1733298	0.000547	2.11e-05	-4.38655	2.43958	-1.279
ILMN_2280568	0.000547	2.12e-05	4.38596	2.43731	0.932219
ILMN_1713636	0.000549	2.13e-05	4.38493	2.43338	1.15803
ILMN_2367681	0.000549	2.13e-05	4.38475	2.4327	1.29925
ILMN_2222786	0.000549	2.13e-05	-4.38436	2.43123	-0.829706
ILMN_1735093	0.00055	2.13e-05	4.38402	2.42992	0.834489
ILMN_1806533	0.000556	2.16e-05	-4.38103	2.41848	-1.65302
ILMN_2396287	0.000557	2.17e-05	-4.37998	2.41446	-1.92514
ILMN_1811598	0.000559	2.18e-05	-4.37884	2.41013	-1.88795
ILMN_2106725	0.000559	2.18e-05	-4.37865	2.40941	-2.25932
ILMN_1761844	0.000561	2.2e-05	4.37693	2.40285	0.942416
ILMN_1664434	0.000561	2.2e-05	4.3769	2.4027	0.79097
ILMN_1665647	0.000561	2.2e-05	-4.37664	2.40171	-0.880635
ILMN_1719646	0.000561	2.2e-05	-4.37656	2.40143	-1.32945
ILMN_1704497	0.000561	2.2e-05	-4.37654	2.40134	-0.517704
ILMN_1743643	0.000561	2.2e-05	4.37651	2.40123	0.766698
ILMN_1683670	0.000566	2.22e-05	-4.37383	2.39101	-1.83151
ILMN_1680279	0.000566	2.23e-05	-4.37362	2.39019	-1.12082
ILMN_2281529	0.00057	2.24e-05	-4.37175	2.38306	-1.03176
ILMN_1670325	0.00057	2.24e-05	-4.37162	2.38257	-1.43119
ILMN_1671235	0.000576	2.27e-05	-4.36879	2.37179	-1.31612
ILMN_2401263	0.000576	2.27e-05	-4.36823	2.36966	-0.960459
ILMN_1696512	0.000579	2.29e-05	-4.36667	2.3637	-1.01391
ILMN_1659696	0.000583	2.31e-05	4.3649	2.35695	1.08386
ILMN_1654468	0.000585	2.32e-05	-4.36364	2.35218	-0.947433
ILMN_1674908	0.000587	2.33e-05	4.36263	2.34831	0.973519
ILMN_1801769	0.00059	2.34e-05	-4.36141	2.34369	-2.07218
ILMN_1673222	0.000591	2.35e-05	4.36049	2.34018	0.93838
ILMN_1780698	0.000593	2.36e-05	4.35938	2.33597	0.906609
ILMN_2313889	0.000595	2.37e-05	-4.35852	2.33266	-0.56139
ILMN_1807009	0.000601	2.4e-05	-4.35553	2.32132	-0.932311
ILMN_1760563	0.000602	2.4e-05	4.35503	2.3194	1.13564
ILMN_2149624	0.000604	2.41e-05	-4.35407	2.31574	-0.7993
ILMN_2377019	0.000604	2.41e-05	4.35373	2.31445	1.19743
ILMN_1777794	0.000607	2.43e-05	4.35234	2.30917	1.16646
ILMN_1776490	0.000607	2.43e-05	4.3521	2.30828	1.33842
ILMN_1734773	0.000607	2.43e-05	-4.35158	2.30629	-1.58079
ILMN_2354237	0.000613	2.46e-05	-4.34921	2.2973	-0.914382
ILMN_1718142	0.000614	2.47e-05	-4.34844	2.29435	-0.394307
ILMN_2391551	0.000617	2.48e-05	4.34689	2.28848	0.829397
ILMN_1775930	0.000618	2.49e-05	-4.34613	2.2856	-1.11355
ILMN_1703886	0.000618	2.49e-05	-4.34599	2.28506	-1.19194
ILMN_2325028	0.000619	2.5e-05	4.34501	2.28133	0.872759
ILMN_1736929	0.000619	2.5e-05	-4.34489	2.28089	-0.969312
ILMN_1737312	0.000619	2.5e-05	-4.34482	2.28061	-0.580352
ILMN_1679130	0.000621	2.51e-05	-4.34385	2.27693	-1.60102
ILMN_2413599	0.000621	2.52e-05	-4.34342	2.27529	-0.996565
ILMN_2162358	0.000621	2.52e-05	-4.34341	2.27528	-1.70914
ILMN_1739497	0.000626	2.54e-05	4.34129	2.26722	0.862549
ILMN_1708107	0.000626	2.54e-05	-4.34093	2.26585	-1.10326
ILMN_1806432	0.000626	2.54e-05	4.3408	2.26535	0.620584
ILMN_1781752	0.000632	2.57e-05	4.338	2.25473	0.680149
ILMN_1762871	0.000632	2.57e-05	-4.33781	2.25401	-1.09536
ILMN_1754266	0.000633	2.58e-05	-4.33732	2.25216	-1.16597
ILMN_2145143	0.000634	2.59e-05	-4.33648	2.24898	-0.752918
ILMN_2316173	0.000637	2.6e-05	4.33504	2.24352	1.73692
ILMN_2331348	0.000643	2.63e-05	4.33225	2.23296	0.964406
ILMN_1736575	0.000643	2.63e-05	4.33221	2.23283	0.814246
ILMN_1741156	0.000644	2.64e-05	4.33156	2.23034	0.7632
ILMN_1676955	0.000646	2.65e-05	4.33078	2.22739	0.769733
ILMN_1663561	0.000647	2.66e-05	4.32979	2.22364	1.24029
ILMN_1798459	0.000647	2.66e-05	4.32948	2.22246	0.856616
ILMN_1761322	0.000647	2.66e-05	-4.32944	2.22233	-1.30284
ILMN_1808217	0.00065	2.68e-05	-4.3281	2.21726	-1.0651
ILMN_1707596	0.000654	2.69e-05	4.3266	2.2116	0.737338
ILMN_2185884	0.000656	2.71e-05	-4.32553	2.20753	-1.80409
ILMN_1685369	0.000657	2.71e-05	4.32482	2.20483	0.986835
ILMN_2219628	0.00066	2.73e-05	4.32353	2.19997	0.820751
ILMN_1655577	0.000664	2.75e-05	-4.32156	2.19252	-1.6548
ILMN_2106380	0.000665	2.76e-05	-4.32093	2.19014	-1.35801
ILMN_1716680	0.000665	2.76e-05	-4.32061	2.18892	-1.68839
ILMN_1745343	0.000665	2.76e-05	4.32048	2.18845	0.875672
ILMN_1815012	0.000665	2.76e-05	4.32039	2.18811	0.876224
ILMN_1803788	0.000669	2.78e-05	4.31881	2.18212	1.29076
ILMN_1722838	0.000669	2.78e-05	-4.31844	2.18072	-1.05802
ILMN_2157510	0.000672	2.8e-05	4.31714	2.17584	0.763777
ILMN_1688848	0.000679	2.83e-05	4.31438	2.16542	0.576887
ILMN_1656706	0.000683	2.85e-05	-4.31269	2.15902	-0.570761
ILMN_1760434	0.000683	2.85e-05	-4.31234	2.1577	-0.885235
ILMN_2240597	0.000683	2.86e-05	4.31208	2.15672	0.89798
ILMN_2260500	0.000683	2.86e-05	4.31201	2.15647	0.776324
ILMN_1696883	0.000683	2.86e-05	4.31166	2.15515	0.565699
ILMN_2192683	0.000683	2.87e-05	4.31124	2.15355	0.724125
ILMN_1671839	0.000683	2.87e-05	4.31116	2.15325	0.632756
ILMN_2127451	0.000685	2.88e-05	-4.31001	2.14893	-0.699764
ILMN_1774781	0.000686	2.89e-05	-4.30936	2.14646	-0.64103
ILMN_1814799	0.000686	2.89e-05	4.30915	2.1457	1.3269
ILMN_1652913	0.000686	2.89e-05	4.30914	2.14562	0.940505
ILMN_1674580	0.000686	2.89e-05	-4.30894	2.14488	-1.29732
ILMN_2188119	0.000687	2.9e-05	-4.30806	2.14155	-0.835243
ILMN_1683998	0.000697	2.95e-05	-4.30445	2.12795	-0.88408
ILMN_1765109	0.000698	2.95e-05	-4.30394	2.12604	-1.69984
ILMN_1695991	0.0007	2.96e-05	4.30303	2.12261	0.513647
ILMN_2182656	0.0007	2.97e-05	-4.30248	2.12053	-0.902929
ILMN_2195892	0.000705	2.99e-05	-4.30077	2.11409	-1.23547
ILMN_1683939	0.000705	3e-05	-4.30017	2.11183	-0.879987
ILMN_2112357	0.000705	3e-05	4.30017	2.11182	1.22258
ILMN_1748102	0.000706	3.01e-05	-4.29947	2.10922	-1.39667
ILMN_2285490	0.000706	3.01e-05	-4.29933	2.10867	-0.995643
ILMN_2251961	0.000706	3.01e-05	4.29911	2.10786	1.08392
ILMN_1804327	0.000706	3.01e-05	4.29883	2.10678	0.854838
ILMN_1750664	0.000707	3.02e-05	-4.29821	2.10445	-1.19462
ILMN_1726410	0.00071	3.03e-05	4.29715	2.10046	1.13782
ILMN_1795991	0.000711	3.05e-05	4.29608	2.09643	0.66084
ILMN_1715416	0.000711	3.05e-05	-4.29606	2.09638	-1.33377
ILMN_1797031	0.000712	3.06e-05	4.29547	2.09416	1.17344
ILMN_1731644	0.000727	3.12e-05	4.29009	2.07393	0.514641
ILMN_1705390	0.000729	3.13e-05	4.28911	2.07026	1.1717
ILMN_1721147	0.00073	3.14e-05	-4.28842	2.06765	-0.558445
ILMN_1706075	0.00073	3.14e-05	4.28838	2.06748	1.02322
ILMN_1729495	0.000735	3.17e-05	4.28662	2.06087	0.787874
ILMN_1711247	0.000737	3.18e-05	-4.28552	2.05675	-1.37275
ILMN_1653648	0.000737	3.18e-05	-4.28522	2.05565	-1.99355
ILMN_1802252	0.000737	3.19e-05	4.285	2.05482	1.08886
ILMN_1654945	0.000741	3.2e-05	4.28359	2.04952	0.830373
ILMN_1812644	0.000743	3.22e-05	-4.28232	2.04474	-1.78686
ILMN_2073115	0.000743	3.22e-05	-4.2822	2.0443	-0.64123
ILMN_1712556	0.000743	3.23e-05	4.28201	2.0436	0.753005
ILMN_2360291	0.000744	3.23e-05	4.28175	2.04262	0.812533
ILMN_1760153	0.000744	3.23e-05	-4.28131	2.04097	-1.02473
ILMN_2297824	0.000744	3.24e-05	4.28098	2.0397	0.824292
ILMN_1795920	0.000745	3.24e-05	-4.28071	2.0387	-2.14341
ILMN_1744835	0.000754	3.29e-05	4.27724	2.02571	1.04247
ILMN_1708906	0.000755	3.29e-05	4.27683	2.02416	0.983178
ILMN_1752884	0.000755	3.3e-05	-4.27634	2.02233	-0.927062
ILMN_2079890	0.000755	3.3e-05	-4.27617	2.02167	-1.26275
ILMN_1729639	0.000756	3.31e-05	-4.27584	2.02045	-0.502723
ILMN_1808835	0.00076	3.33e-05	-4.27419	2.01425	-1.20336
ILMN_2335813	0.000761	3.33e-05	-4.27377	2.01269	-0.786058
ILMN_1716563	0.000762	3.34e-05	-4.27301	2.00985	-1.16639
ILMN_2112493	0.000763	3.35e-05	4.27243	2.00767	1.11636
ILMN_1739812	0.000769	3.38e-05	-4.27017	1.99922	-0.593256
ILMN_2211910	0.000769	3.38e-05	-4.27003	1.99868	-1.71724
ILMN_2357809	0.000772	3.4e-05	4.26905	1.99503	0.760311
ILMN_2082893	0.000772	3.4e-05	4.26867	1.99359	0.81233
ILMN_1689774	0.000773	3.41e-05	4.26816	1.99167	1.34453
ILMN_2285032	0.000777	3.43e-05	-4.26671	1.98624	-1.23825
ILMN_1688094	0.000779	3.44e-05	4.26581	1.98287	0.781393
ILMN_2293631	0.000779	3.45e-05	-4.26553	1.98183	-0.803609
ILMN_1658928	0.000781	3.46e-05	4.26462	1.97844	0.857154
ILMN_1729237	0.000781	3.46e-05	4.26438	1.97754	0.845312
ILMN_2354855	0.000784	3.48e-05	4.26321	1.97315	0.713058
ILMN_2101885	0.000784	3.48e-05	4.26291	1.97204	1.26359
ILMN_1751904	0.000785	3.49e-05	-4.2625	1.97052	-1.27068
ILMN_2217212	0.000792	3.52e-05	4.26008	1.96148	0.960689
ILMN_1775739	0.000794	3.53e-05	-4.25929	1.95852	-0.540012
ILMN_1756070	0.000794	3.54e-05	-4.25853	1.95567	-1.47078
ILMN_1722855	0.000794	3.54e-05	4.25851	1.95561	0.773038
ILMN_2295387	0.000794	3.54e-05	-4.2585	1.95557	-1.28326
ILMN_1733864	0.000794	3.55e-05	-4.25813	1.95417	-0.585314
ILMN_1733559	0.000794	3.55e-05	-4.25812	1.95413	-0.731059
ILMN_1746652	0.000794	3.56e-05	-4.25766	1.95241	-1.21277
ILMN_2150797	0.000797	3.57e-05	-4.25664	1.94863	-1.67065
ILMN_2285713	0.000798	3.58e-05	-4.25598	1.94614	-0.586997
ILMN_1766363	0.000801	3.6e-05	-4.2549	1.94213	-1.16546
ILMN_1688101	0.000809	3.63e-05	-4.25228	1.93233	-0.421077
ILMN_1695576	0.000811	3.65e-05	4.25127	1.92855	1.22378
ILMN_1764628	0.000811	3.65e-05	-4.25107	1.92783	-0.808127
ILMN_1652512	0.000811	3.65e-05	4.25086	1.92703	0.761729
ILMN_2101034	0.000811	3.66e-05	4.25081	1.92685	1.20012
ILMN_1712389	0.000811	3.66e-05	4.25043	1.92544	0.91251
ILMN_2124802	0.00082	3.71e-05	-4.24736	1.91397	-1.14542
ILMN_1743205	0.000824	3.72e-05	4.24611	1.90933	0.868517
ILMN_2407605	0.000827	3.74e-05	4.24484	1.9046	1.15036
ILMN_1800130	0.000835	3.78e-05	-4.24222	1.89484	-0.674875
ILMN_2236655	0.000835	3.79e-05	4.24202	1.89409	0.739731
ILMN_1813911	0.000835	3.79e-05	4.2419	1.89362	0.78122
ILMN_1730325	0.000835	3.79e-05	4.24144	1.89191	0.808287
ILMN_1680330	0.000836	3.8e-05	-4.24114	1.89081	-1.5699
ILMN_2299072	0.000845	3.85e-05	4.23806	1.87932	1.45034
ILMN_1691151	0.000854	3.89e-05	4.23536	1.86929	0.787347
ILMN_1748529	0.000854	3.9e-05	-4.23451	1.86612	-0.487527
ILMN_1814316	0.000854	3.9e-05	-4.2345	1.86609	-1.59023
ILMN_1793570	0.000854	3.9e-05	-4.23441	1.86577	-1.54819
ILMN_1683538	0.000854	3.91e-05	4.23423	1.86508	0.865472
ILMN_1683067	0.000856	3.92e-05	-4.23358	1.86266	-1.17751
ILMN_1719236	0.000856	3.92e-05	-4.23329	1.86158	-0.750577
ILMN_2077680	0.000864	3.96e-05	4.23065	1.85179	1.34528
ILMN_1791447	0.000864	3.96e-05	-4.23047	1.85111	-0.837444
ILMN_1736956	0.000866	3.98e-05	-4.2295	1.8475	-1.05577
ILMN_2353978	0.000866	3.98e-05	4.22933	1.84686	2.65616
ILMN_2245686	0.000866	3.99e-05	-4.22907	1.8459	-1.20679
ILMN_1709814	0.000866	3.99e-05	4.22887	1.84517	0.952232
ILMN_1653432	0.000866	3.99e-05	4.22873	1.84464	0.918815
ILMN_1653793	0.000871	4.02e-05	4.22688	1.83776	0.968911
ILMN_1725043	0.000871	4.02e-05	-4.22688	1.83776	-0.818539
ILMN_1715113	0.000871	4.02e-05	4.22675	1.83728	1.28976
ILMN_2297555	0.000871	4.03e-05	-4.2264	1.83599	-0.63438
ILMN_1696380	0.000872	4.04e-05	-4.2259	1.83412	-1.63716
ILMN_2411745	0.000875	4.05e-05	-4.22484	1.8302	-1.78994
ILMN_2412244	0.000877	4.06e-05	4.22422	1.8279	1.21943
ILMN_2224143	0.000879	4.08e-05	4.22347	1.82512	1.04984
ILMN_1717234	0.000887	4.12e-05	4.2209	1.81557	1.26027
ILMN_2359168	0.000887	4.12e-05	-4.22063	1.81457	-1.3595
ILMN_2041101	0.000894	4.16e-05	4.21831	1.80597	1.68718
ILMN_1814044	0.000895	4.17e-05	4.21791	1.80449	0.76894
ILMN_1691662	0.000895	4.17e-05	-4.21776	1.80391	-1.15854
ILMN_2124471	0.000895	4.18e-05	4.21745	1.80278	0.950719
ILMN_1708323	0.000895	4.18e-05	-4.21732	1.80228	-0.277417
ILMN_1754580	0.000897	4.19e-05	-4.21655	1.79944	-1.22789
ILMN_1778136	0.000898	4.2e-05	4.21586	1.79689	0.991909
ILMN_2151441	0.000899	4.21e-05	4.21557	1.79581	1.11765
ILMN_1658885	0.000899	4.22e-05	4.21497	1.79357	0.678396
ILMN_2157141	0.000899	4.22e-05	-4.21487	1.7932	-1.18208
ILMN_2150802	0.000899	4.22e-05	4.21466	1.79242	0.799895
ILMN_1687052	0.000899	4.22e-05	-4.21453	1.79194	-1.76197
ILMN_1731043	0.000901	4.24e-05	4.21371	1.78891	1.09957
ILMN_1661500	0.000904	4.26e-05	4.21266	1.78503	0.717568
ILMN_1699057	0.000906	4.27e-05	-4.21188	1.78214	-1.05241
ILMN_2320330	0.000906	4.27e-05	-4.21166	1.78132	-1.10035
ILMN_1684357	0.00091	4.29e-05	-4.21045	1.77682	-0.735387
ILMN_1707277	0.000912	4.31e-05	4.20964	1.77384	1.17589
ILMN_1685602	0.000914	4.32e-05	4.20883	1.77083	0.923057
ILMN_1741295	0.00092	4.35e-05	-4.20707	1.76431	-1.21637
ILMN_2318885	0.000922	4.36e-05	-4.2064	1.76184	-0.649303
ILMN_1658619	0.000925	4.38e-05	4.20535	1.75794	1.10308
ILMN_2188451	0.000925	4.39e-05	4.20506	1.75689	1.30143
ILMN_1748983	0.000926	4.4e-05	-4.20445	1.75463	-0.890119
ILMN_1792748	0.000929	4.41e-05	-4.20362	1.75156	-1.06148
ILMN_1660608	0.000929	4.42e-05	-4.20327	1.75026	-1.06596
ILMN_2329885	0.000935	4.45e-05	4.20155	1.74391	1.30829
ILMN_2072101	0.00094	4.47e-05	-4.20002	1.73826	-1.25501
ILMN_2298988	0.000943	4.5e-05	-4.19887	1.73401	-1.6569
ILMN_1676350	0.000943	4.5e-05	-4.19857	1.73289	-0.664197
ILMN_2047460	0.000943	4.5e-05	-4.19845	1.73243	-0.312563
ILMN_1710758	0.000944	4.51e-05	4.19785	1.73023	0.751182
ILMN_1727017	0.000947	4.53e-05	-4.19687	1.72661	-1.7116
ILMN_1701424	0.000947	4.53e-05	4.19677	1.72626	1.24541
ILMN_1770811	0.000949	4.55e-05	4.19592	1.72309	1.01805
ILMN_2404629	0.000955	4.58e-05	4.19415	1.71658	0.788316
ILMN_1740005	0.000961	4.61e-05	-4.19248	1.7104	-1.85476
ILMN_1687609	0.000962	4.62e-05	4.19187	1.70816	0.983696
ILMN_1759341	0.000962	4.62e-05	4.19176	1.70776	1.0383
ILMN_2415144	0.000964	4.64e-05	4.19085	1.70439	1.02409
ILMN_2410905	0.000964	4.64e-05	-4.19072	1.70393	-0.597532
ILMN_1812934	0.000969	4.67e-05	4.18914	1.69809	0.949797
ILMN_1717868	0.000969	4.67e-05	4.18902	1.69764	0.754098
ILMN_2115011	0.00097	4.68e-05	-4.18851	1.69575	-0.792145
ILMN_2160124	0.000971	4.7e-05	-4.18781	1.69319	-1.24409
ILMN_2366642	0.000971	4.7e-05	-4.18781	1.69319	-0.662352
ILMN_1715065	0.000973	4.72e-05	4.18665	1.68889	0.738056
ILMN_1766103	0.000973	4.72e-05	-4.18654	1.68851	-1.14054
ILMN_2164290	0.000973	4.72e-05	-4.18652	1.68844	-1.08484
ILMN_1651693	0.000973	4.72e-05	-4.18644	1.68815	-0.394042
ILMN_1661519	0.000983	4.78e-05	-4.18358	1.67757	-0.554542
ILMN_1669227	0.000985	4.79e-05	-4.18297	1.67532	-0.796341
ILMN_1658624	0.00099	4.82e-05	4.18127	1.66909	0.688588
ILMN_1805024	0.00099	4.82e-05	4.18121	1.66887	0.76729
ILMN_1672878	0.00099	4.82e-05	4.18101	1.66814	0.917515
ILMN_1664231	0.000991	4.83e-05	4.1805	1.66624	0.764219
ILMN_1754178	0.000991	4.84e-05	4.18036	1.66573	0.778359
ILMN_1783771	0.000994	4.85e-05	4.1795	1.66256	1.07153
ILMN_1658995	0.000994	4.86e-05	4.17916	1.6613	0.663358
ILMN_1651776	0.000995	4.87e-05	4.17862	1.65932	0.842683
ILMN_1764414	0.001	4.9e-05	-4.17697	1.65326	-1.14523
ILMN_1711331	0.001	4.91e-05	-4.17631	1.65081	-1.40245
ILMN_1746846	0.001	4.92e-05	-4.17629	1.65076	-1.29304
ILMN_2402416	0.00101	4.96e-05	4.17384	1.64173	0.722584
ILMN_1676452	0.00102	5e-05	-4.1722	1.6357	-1.27818
ILMN_2303955	0.00102	5e-05	-4.17207	1.63523	-0.584308
ILMN_1787813	0.00102	5.02e-05	4.17107	1.63156	0.693326
ILMN_1658351	0.00102	5.02e-05	4.1708	1.63058	0.797984
ILMN_1691539	0.00103	5.08e-05	4.16794	1.62005	1.24225
ILMN_1694593	0.00103	5.1e-05	-4.16697	1.61648	-1.5737
ILMN_2364828	0.00104	5.13e-05	4.16541	1.61078	1.0192
ILMN_1697338	0.00104	5.13e-05	-4.16537	1.61064	-1.52876
ILMN_1651405	0.00104	5.14e-05	4.16478	1.60844	0.444346
ILMN_2328327	0.00104	5.16e-05	4.16385	1.60504	1.22037
ILMN_1669508	0.00104	5.16e-05	4.16378	1.60477	1.07132
ILMN_1695852	0.00105	5.19e-05	-4.16258	1.60038	-0.580936
ILMN_1748831	0.00105	5.2e-05	4.16201	1.59829	0.678586
ILMN_1673867	0.00105	5.21e-05	-4.16157	1.59667	-0.537678
ILMN_1730032	0.00105	5.22e-05	-4.16102	1.59465	-0.916782
ILMN_1698419	0.00105	5.24e-05	4.16003	1.59104	0.875503
ILMN_1677292	0.00106	5.25e-05	4.15937	1.58862	1.11869
ILMN_1758457	0.00106	5.26e-05	4.15894	1.58701	0.715817
ILMN_1756867	0.00106	5.28e-05	4.15835	1.58487	0.554535
ILMN_1740165	0.00106	5.28e-05	4.15833	1.58481	1.20526
ILMN_2253145	0.00106	5.32e-05	-4.15642	1.5778	-1.80868
ILMN_1781280	0.00106	5.32e-05	-4.15611	1.57663	-0.958063
ILMN_1794842	0.00106	5.33e-05	-4.1559	1.57588	-0.561959
ILMN_2087528	0.00107	5.34e-05	4.15514	1.57309	0.629065
ILMN_1695341	0.00107	5.37e-05	-4.15375	1.568	-0.578318
ILMN_2353754	0.00107	5.38e-05	-4.1536	1.56747	-0.598472
ILMN_2402806	0.00107	5.38e-05	4.15357	1.56733	0.696243
ILMN_1681927	0.00107	5.39e-05	4.15306	1.56548	0.632884
ILMN_1802089	0.00107	5.4e-05	4.15238	1.56297	0.862518
ILMN_2315694	0.00107	5.41e-05	4.15192	1.56131	1.07567
ILMN_1728435	0.00107	5.41e-05	4.15183	1.56096	0.703443
ILMN_1753758	0.00108	5.42e-05	-4.1516	1.56014	-0.651354
ILMN_2189815	0.00108	5.42e-05	-4.1514	1.55938	-0.509437
ILMN_1679897	0.00108	5.44e-05	-4.15048	1.55603	-1.86319
ILMN_1812976	0.00108	5.44e-05	-4.15036	1.55559	-1.81809
ILMN_1731178	0.00108	5.45e-05	-4.1502	1.555	-0.62962
ILMN_1676437	0.00109	5.49e-05	-4.14805	1.54713	-0.926087
ILMN_1777726	0.00109	5.51e-05	4.14723	1.54414	1.09182
ILMN_1682428	0.00109	5.51e-05	-4.14713	1.54376	-1.68145
ILMN_1716967	0.00109	5.51e-05	-4.14707	1.54356	-1.00385
ILMN_1666976	0.00109	5.52e-05	4.1468	1.54256	1.13568
ILMN_1694776	0.00109	5.55e-05	-4.14546	1.53766	-1.05023
ILMN_2285404	0.00109	5.57e-05	4.14455	1.53434	1.42345
ILMN_1724581	0.00109	5.58e-05	4.14416	1.53291	0.610358
ILMN_1814074	0.00109	5.58e-05	4.14416	1.5329	1.39956
ILMN_1653228	0.00109	5.58e-05	-4.14415	1.53286	-0.726737
ILMN_1651828	0.0011	5.6e-05	4.143	1.52865	0.474612
ILMN_1798534	0.0011	5.62e-05	-4.14245	1.52667	-1.17278
ILMN_1662390	0.0011	5.64e-05	4.14123	1.52219	1.06103
ILMN_2339627	0.00111	5.66e-05	4.14043	1.51927	0.909085
ILMN_1651949	0.00111	5.68e-05	4.13979	1.51693	0.853372
ILMN_1687247	0.00111	5.68e-05	4.13957	1.51615	1.29354
ILMN_1797184	0.00111	5.71e-05	-4.13818	1.51106	-1.18233
ILMN_1815079	0.00111	5.71e-05	4.13801	1.51045	0.856731
ILMN_1737394	0.00112	5.76e-05	4.13585	1.50255	0.766075
ILMN_1793988	0.00112	5.77e-05	-4.13575	1.50218	-0.414993
ILMN_1669094	0.00112	5.77e-05	4.13541	1.50095	1.001
ILMN_1704241	0.00112	5.78e-05	-4.13516	1.50002	-1.21945
ILMN_2111932	0.00112	5.78e-05	4.13494	1.49921	1.97456
ILMN_2352380	0.00112	5.79e-05	4.13456	1.49783	0.546531
ILMN_1697301	0.00113	5.81e-05	-4.13381	1.49509	-0.699829
ILMN_1730999	0.00113	5.84e-05	4.13264	1.49083	1.21742
ILMN_2063114	0.00113	5.84e-05	4.13245	1.49015	0.87873
ILMN_1680424	0.00113	5.85e-05	-4.13216	1.48906	-1.5943
ILMN_1691290	0.00113	5.87e-05	4.13126	1.48582	1.26717
ILMN_2105177	0.00113	5.87e-05	-4.13124	1.48573	-0.672807
ILMN_1804051	0.00113	5.88e-05	4.1308	1.48413	1.06892
ILMN_2277676	0.00114	5.89e-05	4.13013	1.48168	1.18168
ILMN_2126239	0.00114	5.92e-05	4.12891	1.47724	1.04189
ILMN_2141523	0.00114	5.93e-05	-4.12873	1.47658	-0.655626
ILMN_1681235	0.00114	5.95e-05	-4.12781	1.47322	-0.481681
ILMN_1776953	0.00115	6.01e-05	4.12529	1.46404	0.629756
ILMN_1663512	0.00116	6.04e-05	4.12405	1.45952	0.692812
ILMN_1694389	0.00117	6.1e-05	-4.12149	1.45019	-1.12691
ILMN_1761637	0.00117	6.1e-05	-4.12118	1.44905	-1.2371
ILMN_1662232	0.00117	6.12e-05	4.12067	1.4472	0.885526
ILMN_1659888	0.00118	6.18e-05	4.11793	1.43724	1.05828
ILMN_1810159	0.00118	6.18e-05	-4.11789	1.43709	-1.44362
ILMN_1757237	0.0012	6.28e-05	4.11405	1.42313	0.869004
ILMN_1716342	0.0012	6.31e-05	4.11268	1.41813	0.848772
ILMN_1657847	0.0012	6.31e-05	-4.11259	1.41781	-0.70324
ILMN_1654068	0.0012	6.31e-05	4.11253	1.41761	0.648886
ILMN_1651237	0.00122	6.41e-05	4.10882	1.40413	1.35135
ILMN_1721283	0.00122	6.41e-05	-4.10872	1.40376	-0.791828
ILMN_1751645	0.00123	6.44e-05	-4.10752	1.3994	-0.490211
ILMN_2195957	0.00123	6.49e-05	4.10563	1.39255	0.789532
ILMN_1727553	0.00123	6.5e-05	4.10518	1.39092	1.28623
ILMN_2339192	0.00123	6.5e-05	-4.10503	1.39037	-0.414329
ILMN_2410262	0.00124	6.52e-05	-4.10434	1.38785	-0.941372
ILMN_1801572	0.00124	6.56e-05	4.10258	1.38148	1.01779
ILMN_1672149	0.00125	6.61e-05	4.10086	1.37525	0.899062
ILMN_1687960	0.00126	6.65e-05	4.09925	1.36941	1.32791
ILMN_2171649	0.00126	6.65e-05	-4.09907	1.36875	-0.801903
ILMN_1775074	0.00126	6.66e-05	4.09904	1.36865	1.32347
ILMN_1701507	0.00126	6.66e-05	-4.09885	1.36794	-1.15289
ILMN_1777049	0.00126	6.69e-05	4.09789	1.36446	0.834518
ILMN_1780649	0.00126	6.7e-05	-4.09741	1.36271	-1.53375
ILMN_1691743	0.00126	6.71e-05	-4.09678	1.36047	-1.33366
ILMN_2164242	0.00126	6.72e-05	4.09661	1.35983	1.28663
ILMN_1772179	0.00126	6.73e-05	-4.09636	1.35894	-1.53043
ILMN_1721024	0.00127	6.74e-05	4.09594	1.35739	1.05297
ILMN_2321282	0.00128	6.8e-05	-4.09343	1.3483	-0.377901
ILMN_1709408	0.00128	6.82e-05	-4.09262	1.3454	-1.138
ILMN_1769563	0.00129	6.86e-05	-4.0914	1.34097	-0.715283
ILMN_2179579	0.00129	6.88e-05	-4.09055	1.33788	-0.644964
ILMN_1686948	0.00129	6.89e-05	4.09026	1.33684	0.763228
ILMN_2411139	0.00129	6.9e-05	4.08994	1.33568	0.748591
ILMN_1701466	0.00129	6.92e-05	4.0891	1.33263	0.994812
ILMN_1807044	0.0013	6.98e-05	4.08684	1.32448	1.19449
ILMN_2131811	0.00131	7e-05	-4.08601	1.32145	-1.7735
ILMN_1749162	0.00131	7e-05	-4.08599	1.32139	-0.826726
ILMN_2402079	0.00131	7.03e-05	4.08504	1.31796	0.878751
ILMN_1815118	0.00131	7.04e-05	-4.0846	1.31639	-1.19986
ILMN_1679152	0.00131	7.04e-05	-4.08449	1.31597	-1.10658
ILMN_1661566	0.00131	7.05e-05	-4.08428	1.31522	-1.2201
ILMN_2226628	0.00132	7.1e-05	4.08238	1.30836	0.695523
ILMN_1731609	0.00132	7.11e-05	4.08221	1.30776	1.04259
ILMN_1805999	0.00132	7.11e-05	4.08208	1.30727	1.04097
ILMN_1811682	0.00132	7.14e-05	4.08113	1.30383	0.910772
ILMN_2378670	0.00133	7.18e-05	-4.07965	1.29849	-1.06595
ILMN_1703006	0.00133	7.18e-05	4.07937	1.2975	1.33642
ILMN_1676213	0.00133	7.19e-05	4.07923	1.29695	0.892814
ILMN_2363273	0.00133	7.2e-05	4.07889	1.29576	0.920857
ILMN_2159044	0.00133	7.2e-05	4.07875	1.29525	0.813181
ILMN_1668378	0.00133	7.2e-05	4.07867	1.29496	0.882869
ILMN_2136068	0.00133	7.21e-05	4.07835	1.29379	0.898067
ILMN_1660400	0.00133	7.23e-05	-4.07789	1.29213	-1.65528
ILMN_1748797	0.00133	7.23e-05	4.07782	1.29187	0.802498
ILMN_2400663	0.00133	7.24e-05	4.07754	1.29087	0.873662
ILMN_2073543	0.00133	7.24e-05	-4.07728	1.28993	-0.528549
ILMN_1717695	0.00133	7.25e-05	-4.07721	1.28967	-0.588364
ILMN_1699695	0.00133	7.27e-05	4.07649	1.28708	0.988376
ILMN_1754558	0.00134	7.29e-05	-4.07554	1.28364	-0.794881
ILMN_1685365	0.00134	7.3e-05	-4.07523	1.28253	-0.642306
ILMN_1659874	0.00134	7.31e-05	4.07505	1.28187	0.720431
ILMN_2331525	0.00135	7.37e-05	4.07297	1.27438	1.14429
ILMN_1770085	0.00136	7.41e-05	-4.07146	1.26895	-0.993534
ILMN_2067303	0.00136	7.43e-05	-4.07078	1.26647	-0.868755
ILMN_1687827	0.00136	7.47e-05	-4.06936	1.26136	-0.945069
ILMN_2325506	0.00137	7.5e-05	4.0683	1.25754	1.15296
ILMN_1690884	0.00137	7.51e-05	-4.06803	1.25659	-1.5278
ILMN_1815745	0.00137	7.53e-05	4.06732	1.25403	1.167
ILMN_2408543	0.00138	7.58e-05	4.06556	1.2477	1.25774
ILMN_1707710	0.00138	7.59e-05	-4.06539	1.24706	-0.671151
ILMN_1736820	0.00138	7.59e-05	-4.06537	1.24701	-0.698269
ILMN_2319544	0.00138	7.59e-05	4.0651	1.24601	1.0305
ILMN_2076940	0.00138	7.61e-05	-4.0644	1.24352	-1.35385
ILMN_1811877	0.00139	7.67e-05	-4.06254	1.23681	-0.994605
ILMN_2055271	0.00139	7.68e-05	-4.06214	1.23537	-0.932106
ILMN_1761138	0.0014	7.73e-05	4.06037	1.22898	0.946795
ILMN_2291092	0.0014	7.74e-05	-4.06018	1.2283	-0.998697
ILMN_2362681	0.0014	7.75e-05	-4.05997	1.22755	-0.673244
ILMN_1789007	0.0014	7.76e-05	-4.05967	1.22648	-0.997855
ILMN_1670306	0.0014	7.77e-05	-4.0591	1.22442	-0.424795
ILMN_1722127	0.0014	7.78e-05	-4.05892	1.2238	-0.970335
ILMN_1690105	0.0014	7.78e-05	4.05891	1.22375	1.03859
ILMN_1772627	0.0014	7.79e-05	-4.05868	1.22293	-0.869484
ILMN_1812478	0.00141	7.81e-05	4.05793	1.22022	0.774151
ILMN_2362245	0.00141	7.84e-05	4.05698	1.21679	0.526063
ILMN_2162989	0.00142	7.88e-05	4.05551	1.21154	0.731774
ILMN_2252160	0.00142	7.89e-05	-4.05535	1.21095	-0.938416
ILMN_2368856	0.00142	7.89e-05	-4.05526	1.21064	-0.57536
ILMN_1794470	0.00142	7.92e-05	4.05431	1.20721	0.674253
ILMN_2405628	0.00143	7.95e-05	4.05324	1.20336	1.03622
ILMN_1694547	0.00143	7.96e-05	-4.05292	1.20222	-1.69021
ILMN_2156267	0.00143	7.97e-05	4.05262	1.20115	1.12283
ILMN_2346316	0.00146	8.14e-05	-4.04725	1.18186	-0.741787
ILMN_2395692	0.00146	8.14e-05	-4.04714	1.18148	-1.1599
ILMN_2204142	0.00146	8.15e-05	-4.04668	1.17983	-0.864405
ILMN_1668593	0.00146	8.19e-05	-4.04545	1.17542	-1.88723
ILMN_1686626	0.00146	8.2e-05	4.04519	1.17446	0.392888
ILMN_1793017	0.00146	8.22e-05	4.04476	1.17292	0.785446
ILMN_1749709	0.00148	8.32e-05	4.04148	1.16117	0.617189
ILMN_1702237	0.00149	8.34e-05	4.04071	1.15844	0.762797
ILMN_1714417	0.00149	8.36e-05	4.04015	1.15643	0.789935
ILMN_1673177	0.00149	8.37e-05	-4.03983	1.15525	-0.639968
ILMN_1676611	0.00149	8.38e-05	4.0397	1.15479	0.852077
ILMN_1730670	0.00149	8.38e-05	4.03961	1.15448	0.807444
ILMN_1666192	0.00149	8.39e-05	4.03933	1.15347	0.792879
ILMN_1694780	0.00149	8.4e-05	-4.03911	1.1527	-1.66991
ILMN_2332368	0.00149	8.43e-05	4.03812	1.14913	0.604537
ILMN_2157421	0.00151	8.54e-05	4.03482	1.13731	1.00822
ILMN_1659836	0.00151	8.55e-05	-4.03451	1.13622	-1.08581
ILMN_1723962	0.00151	8.57e-05	4.03391	1.13406	0.915741
ILMN_1781374	0.00151	8.57e-05	4.03381	1.13371	0.947011
ILMN_1752247	0.00152	8.63e-05	4.03191	1.12692	1.52965
ILMN_2103977	0.00153	8.68e-05	-4.03043	1.12161	-1.14648
ILMN_1742813	0.00153	8.7e-05	4.02996	1.11996	0.879046
ILMN_1711381	0.00153	8.72e-05	-4.0294	1.11793	-0.914682
ILMN_1683194	0.00153	8.72e-05	-4.02938	1.11785	-0.711413
ILMN_1788122	0.00154	8.74e-05	-4.0287	1.11542	-1.10547
ILMN_2119945	0.00154	8.74e-05	4.02856	1.11494	0.707061
ILMN_2347807	0.00154	8.79e-05	4.02735	1.11059	1.36198
ILMN_2203544	0.00154	8.8e-05	-4.02683	1.10874	-1.07891
ILMN_1758523	0.00155	8.86e-05	4.02505	1.10239	1.08426
ILMN_1741244	0.00155	8.87e-05	4.0249	1.10186	0.537343
ILMN_1701937	0.00156	8.89e-05	4.0244	1.10007	0.896304
ILMN_1753143	0.00156	8.93e-05	4.02319	1.09573	1.47173
ILMN_1722089	0.00156	8.94e-05	-4.02274	1.09415	-0.847305
ILMN_1760513	0.00156	8.94e-05	-4.02274	1.09414	-1.71448
ILMN_1797578	0.00156	8.96e-05	-4.0223	1.09258	-0.783067
ILMN_1759766	0.00157	8.97e-05	4.02186	1.09101	1.4564
ILMN_1668277	0.00157	8.99e-05	-4.02143	1.08946	-0.417818
ILMN_2108025	0.00157	9e-05	-4.02103	1.08802	-1.18053
ILMN_1756455	0.00157	9.01e-05	-4.02092	1.08765	-0.907737
ILMN_1741942	0.00157	9.02e-05	4.02054	1.08628	0.946111
ILMN_1719811	0.00157	9.04e-05	-4.01995	1.08417	-1.19209
ILMN_1728331	0.00157	9.04e-05	-4.01987	1.08388	-1.42118
ILMN_1660639	0.00157	9.06e-05	-4.01943	1.08232	-0.926143
ILMN_1811478	0.00157	9.07e-05	4.01919	1.08147	1.09805
ILMN_1708204	0.00158	9.09e-05	4.01843	1.07877	1.24045
ILMN_2088234	0.00158	9.1e-05	-4.01809	1.07753	-0.510323
ILMN_2337880	0.00158	9.11e-05	-4.01799	1.07718	-1.15713
ILMN_1693466	0.00158	9.12e-05	4.01769	1.07613	0.814976
ILMN_1799282	0.00158	9.13e-05	-4.01737	1.07499	-1.3362
ILMN_1791523	0.00158	9.14e-05	-4.0171	1.07403	-1.24538
ILMN_1747580	0.00158	9.15e-05	-4.01686	1.07316	-1.38169
ILMN_2371700	0.00158	9.16e-05	4.01638	1.07146	1.12929
ILMN_2415826	0.00158	9.17e-05	4.01635	1.07134	0.878571
ILMN_1807712	0.00158	9.2e-05	4.01549	1.06826	0.9819
ILMN_1661194	0.00159	9.21e-05	-4.015	1.06652	-1.28212
ILMN_2150187	0.00159	9.23e-05	4.01443	1.06448	1.01295
ILMN_1655684	0.00159	9.27e-05	4.01347	1.06109	0.669687
ILMN_1749579	0.00159	9.28e-05	4.01321	1.06016	1.26444
ILMN_1663963	0.0016	9.3e-05	-4.01253	1.05773	-1.14072
ILMN_2077160	0.0016	9.34e-05	-4.01147	1.05395	-1.96409
ILMN_1775522	0.0016	9.34e-05	4.01135	1.05352	0.940423
ILMN_1654370	0.00161	9.41e-05	-4.00948	1.04686	-0.712927
ILMN_1775330	0.00161	9.41e-05	4.00946	1.04679	1.90836
ILMN_2298511	0.00161	9.43e-05	4.00888	1.04473	0.79078
ILMN_1774480	0.00161	9.45e-05	-4.0085	1.04337	-0.596714
ILMN_1657797	0.00161	9.45e-05	4.00848	1.0433	0.425143
ILMN_1684746	0.00161	9.45e-05	4.00841	1.04305	0.847816
ILMN_2385161	0.00161	9.46e-05	4.008	1.04159	0.987824
ILMN_2409793	0.00161	9.47e-05	4.00796	1.04145	1.29683
ILMN_1671142	0.00162	9.51e-05	-4.00682	1.0374	-0.865856
ILMN_2294644	0.00162	9.51e-05	4.00664	1.03676	0.664558
ILMN_2052549	0.00162	9.55e-05	-4.00575	1.0336	-0.858104
ILMN_2397627	0.00162	9.55e-05	4.00569	1.03336	0.551655
ILMN_1723113	0.00162	9.55e-05	-4.00563	1.03314	-0.801625
ILMN_1655645	0.00162	9.57e-05	4.00521	1.03168	0.720333
ILMN_1773312	0.00163	9.6e-05	4.00429	1.02841	0.876448
ILMN_2161357	0.00163	9.61e-05	4.004	1.02734	0.832495
ILMN_1665423	0.00164	9.67e-05	4.00237	1.02155	1.00767
ILMN_1720542	0.00164	9.69e-05	4.00176	1.01939	0.82696
ILMN_2157075	0.00164	9.71e-05	4.00136	1.01798	0.688747
ILMN_2176225	0.00164	9.71e-05	-4.00122	1.01749	-0.733668
ILMN_1712620	0.00164	9.72e-05	-4.00113	1.01715	-0.614481
ILMN_2141650	0.00164	9.73e-05	-4.00065	1.01546	-1.10809
ILMN_1763775	0.00164	9.74e-05	-4.00043	1.01467	-0.568693
ILMN_1702568	0.00165	9.79e-05	-3.99909	1.00991	-1.46987
ILMN_1783598	0.00165	9.8e-05	-3.99883	1.00897	-1.80256
ILMN_1761476	0.00167	9.9e-05	3.99628	0.999928	0.650908
ILMN_1786004	0.00167	9.9e-05	-3.99627	0.999872	-1.59431
ILMN_2118201	0.00167	9.95e-05	-3.99483	0.994755	-2.04104
ILMN_2115813	0.00168	9.98e-05	-3.99419	0.992499	-1.48567
ILMN_1756849	0.00168	9.99e-05	3.99391	0.991509	1.17009
ILMN_1692785	0.00168	9.99e-05	-3.99377	0.991027	-1.48669
ILMN_1776516	0.00168	0.0001	3.99372	0.990842	1.40749
ILMN_1690595	0.00168	0.0001	-3.9935	0.990045	-0.971338
ILMN_1658369	0.00168	0.0001	-3.99284	0.987722	-1.10353
ILMN_1671058	0.00168	0.0001	-3.99272	0.98729	-1.14807
ILMN_2359733	0.00168	0.0001	-3.99253	0.986615	-1.04743
ILMN_1791796	0.00168	0.0001	-3.99249	0.98646	-1.07475
ILMN_2324029	0.00168	0.0001	3.99232	0.985864	0.982765
ILMN_2065254	0.00169	0.000101	-3.99059	0.979727	-0.573493
ILMN_1754002	0.00169	0.000101	-3.98998	0.977549	-1.30672
ILMN_2410975	0.0017	0.000102	3.98857	0.972548	1.13583
ILMN_1717674	0.0017	0.000102	-3.98747	0.968675	-0.84461
ILMN_1744806	0.00171	0.000103	-3.98644	0.965012	-0.965996
ILMN_1718519	0.00171	0.000103	-3.98616	0.96402	-0.560034
ILMN_1708267	0.00172	0.000104	3.98396	0.956241	1.00951
ILMN_1784799	0.00172	0.000104	3.98373	0.95539	1.00469
ILMN_1789463	0.00173	0.000104	-3.98341	0.954281	-0.725927
ILMN_1719763	0.00173	0.000104	3.98297	0.952704	0.900586
ILMN_2206080	0.00173	0.000104	-3.98245	0.950888	-0.843547
ILMN_2358277	0.00173	0.000105	3.98152	0.947597	0.663545
ILMN_1660199	0.00173	0.000105	-3.98148	0.947449	-1.08201
ILMN_2120340	0.00174	0.000105	3.98046	0.943812	0.850683
ILMN_2191192	0.00174	0.000105	-3.98011	0.942587	-1.30551
ILMN_2121958	0.00174	0.000105	-3.97964	0.94091	-0.740839
ILMN_1718629	0.00175	0.000106	-3.97868	0.937531	-0.406629
ILMN_1743357	0.00175	0.000106	-3.9785	0.9369	-0.648157
ILMN_2335123	0.00176	0.000107	-3.9763	0.929117	-1.2445
ILMN_1661646	0.00176	0.000107	-3.97565	0.926796	-0.557286
ILMN_1653115	0.00177	0.000107	3.97531	0.925594	1.06152
ILMN_1793006	0.00177	0.000107	-3.97512	0.924917	-0.464746
ILMN_2393497	0.00177	0.000108	3.9744	0.922383	0.834011
ILMN_1715526	0.00177	0.000108	3.97433	0.922137	0.934918
ILMN_1736460	0.00177	0.000108	3.97378	0.920196	0.607461
ILMN_2131447	0.00177	0.000108	-3.97349	0.919185	-1.41965
ILMN_1740864	0.00177	0.000108	-3.97309	0.917757	-0.657559
ILMN_1702943	0.00177	0.000108	-3.97277	0.916641	-0.367077
ILMN_2173891	0.00178	0.000109	-3.97198	0.91382	-0.815188
ILMN_1796341	0.00178	0.000109	3.97172	0.912927	0.891161
ILMN_1728684	0.00179	0.000109	3.97051	0.908642	1.55248
ILMN_1754656	0.00179	0.000109	-3.96988	0.906406	-1.09965
ILMN_1768855	0.00179	0.00011	-3.96955	0.905261	-0.920645
ILMN_2182850	0.00179	0.00011	-3.96936	0.904562	-1.04531
ILMN_2370872	0.00179	0.00011	3.96886	0.902805	0.668362
ILMN_1663390	0.00179	0.00011	3.96854	0.901675	1.50911
ILMN_1666019	0.0018	0.00011	3.9678	0.899078	0.956221
ILMN_1811729	0.0018	0.000111	3.96733	0.897419	0.865117
ILMN_1793213	0.0018	0.000111	-3.96692	0.895953	-1.02412
ILMN_1720930	0.0018	0.000111	3.9669	0.895884	1.24397
ILMN_2262901	0.0018	0.000111	3.96678	0.89547	0.4895
ILMN_1753773	0.0018	0.000111	-3.96637	0.894016	-0.449347
ILMN_1656225	0.0018	0.000111	-3.96567	0.891536	-0.799573
ILMN_1656638	0.00181	0.000111	-3.96512	0.889613	-2.10993
ILMN_2221564	0.00181	0.000112	-3.96495	0.889021	-0.857352
ILMN_1800020	0.00181	0.000112	-3.96463	0.88787	-0.480052
ILMN_1658626	0.00181	0.000112	3.96344	0.883683	1.40035
ILMN_2120325	0.00181	0.000112	-3.96335	0.883357	-0.853914
ILMN_2150465	0.00182	0.000112	-3.96287	0.881657	-0.54898
ILMN_2334989	0.00182	0.000113	3.96265	0.880901	1.20144
ILMN_2363165	0.00182	0.000113	3.96245	0.880193	0.805415
ILMN_1731206	0.00182	0.000113	3.96228	0.879593	1.22614
ILMN_1738239	0.00182	0.000113	3.96211	0.878973	1.08993
ILMN_1659678	0.00182	0.000113	-3.96176	0.877745	-0.592786
ILMN_2342651	0.00183	0.000114	-3.96022	0.872326	-0.767003
ILMN_1755251	0.00183	0.000114	-3.95897	0.86793	-0.905517
ILMN_2408663	0.00183	0.000114	-3.95882	0.867377	-0.861083
ILMN_2247572	0.00183	0.000114	-3.95874	0.867095	-1.31742
ILMN_2106902	0.00183	0.000114	-3.95839	0.865881	-0.712851
ILMN_1746588	0.00183	0.000114	3.95835	0.865718	1.29059
ILMN_1735453	0.00183	0.000114	3.95826	0.865428	0.748704
ILMN_1740752	0.00184	0.000115	3.95777	0.863672	0.460935
ILMN_2414007	0.00184	0.000115	3.95776	0.863649	1.29249
ILMN_1707398	0.00184	0.000115	-3.95692	0.860709	-0.648851
ILMN_1805643	0.00184	0.000115	3.95641	0.858916	0.777775
ILMN_1761917	0.00184	0.000115	-3.9559	0.857108	-1.1706
ILMN_1803110	0.00185	0.000116	3.95565	0.856223	0.621609
ILMN_2297511	0.00185	0.000116	-3.95488	0.853507	-1.05219
ILMN_2227817	0.00185	0.000116	-3.95478	0.853144	-0.595863
ILMN_1688672	0.00185	0.000116	-3.95477	0.853127	-1.08428
ILMN_2137084	0.00185	0.000116	3.9544	0.851835	0.95937
ILMN_1773927	0.00185	0.000116	-3.95402	0.850468	-0.85003
ILMN_1714228	0.00185	0.000117	-3.95354	0.848793	-0.999624
ILMN_1764629	0.00185	0.000117	-3.95325	0.84776	-0.971052
ILMN_1706579	0.00185	0.000117	-3.95303	0.847	-1.54544
ILMN_2407851	0.00186	0.000117	-3.95186	0.842887	-1.04178
ILMN_1700770	0.00186	0.000117	-3.95133	0.84102	-0.465463
ILMN_1731619	0.00187	0.000118	3.95021	0.837059	1.19564
ILMN_2143566	0.00188	0.000118	3.94917	0.833403	0.974341
ILMN_2105960	0.00188	0.000119	3.94894	0.832585	1.69179
ILMN_1740762	0.00191	0.000121	3.94461	0.817364	1.08185
ILMN_2295559	0.00192	0.000121	-3.94304	0.811846	-0.812674
ILMN_2163723	0.00192	0.000121	3.94248	0.809911	0.816263
ILMN_1804845	0.00192	0.000122	-3.94193	0.807952	-1.11589
ILMN_2411317	0.00192	0.000122	-3.94154	0.806588	-0.586572
ILMN_1655612	0.00192	0.000122	3.94133	0.805872	0.895556
ILMN_2245305	0.00192	0.000122	3.94113	0.80517	0.86028
ILMN_1793360	0.00193	0.000123	-3.94024	0.802029	-1.59956
ILMN_1719695	0.00194	0.000123	3.93898	0.797607	1.36698
ILMN_1753515	0.00194	0.000123	-3.93879	0.796928	-1.02385
ILMN_2392143	0.00194	0.000124	3.93784	0.793612	1.01018
ILMN_2166865	0.00194	0.000124	3.93763	0.792853	0.761217
ILMN_2230162	0.00195	0.000124	-3.93722	0.791414	-0.768795
ILMN_2302983	0.00196	0.000125	-3.9357	0.786086	-1.72339
ILMN_2262275	0.00196	0.000125	-3.93451	0.781938	-0.889079
ILMN_1657317	0.00198	0.000126	-3.93227	0.77406	-1.13967
ILMN_1783636	0.00198	0.000126	-3.93205	0.773302	-0.9007
ILMN_1735192	0.00198	0.000126	-3.93193	0.77288	-0.804272
ILMN_1775045	0.00198	0.000127	-3.93108	0.769918	-1.38845
ILMN_2085339	0.00198	0.000127	-3.93083	0.769025	-0.730476
ILMN_1785896	0.00199	0.000128	-3.9297	0.765066	-0.589467
ILMN_1755737	0.00199	0.000128	3.92955	0.764533	0.458428
ILMN_2197659	0.00201	0.000129	-3.9267	0.75457	-0.340545
ILMN_1664289	0.00202	0.000129	-3.92603	0.752229	-2.1591
ILMN_2398847	0.00203	0.00013	3.92461	0.747247	0.672458
ILMN_1705551	0.00203	0.00013	-3.92416	0.745661	-1.93296
ILMN_2381537	0.00203	0.00013	-3.92391	0.744807	-0.638595
ILMN_2062832	0.00203	0.00013	-3.92371	0.744101	-0.535973
ILMN_1767303	0.00203	0.000131	-3.92344	0.743135	-0.446513
ILMN_1758529	0.00203	0.000131	-3.92329	0.74262	-1.51818
ILMN_1813620	0.00203	0.000131	3.92252	0.739936	0.819897
ILMN_1706852	0.00203	0.000131	-3.9225	0.739855	-0.683833
ILMN_1710979	0.00203	0.000131	3.92244	0.73965	0.854986
ILMN_1659240	0.00204	0.000131	3.92187	0.737645	0.714081
ILMN_2367671	0.00205	0.000132	3.92001	0.731171	1.03237
ILMN_1702517	0.00205	0.000133	-3.91919	0.728276	-0.856059
ILMN_2391231	0.00206	0.000133	-3.91776	0.723302	-1.27844
ILMN_2074432	0.00207	0.000134	-3.91649	0.718858	-1.85818
ILMN_1727173	0.00207	0.000134	3.9164	0.718545	0.789272
ILMN_2333367	0.00207	0.000134	3.91607	0.717389	0.834734
ILMN_1772981	0.00207	0.000135	3.91558	0.715669	0.560615
ILMN_1679798	0.00208	0.000135	-3.9148	0.712949	-1.02343
ILMN_1683149	0.00208	0.000135	-3.91476	0.712818	-0.800637
ILMN_2298624	0.00208	0.000135	3.91447	0.711801	0.759784
ILMN_1661490	0.00208	0.000135	3.91404	0.710301	0.49811
ILMN_1654118	0.00209	0.000136	3.91257	0.705155	0.883665
ILMN_1758679	0.00209	0.000136	-3.91207	0.703412	-1.16111
ILMN_2415439	0.00209	0.000136	3.9118	0.702477	0.532964
ILMN_2373106	0.00209	0.000137	3.91168	0.702072	0.937886
ILMN_1664330	0.0021	0.000137	-3.91073	0.698735	-1.37163
ILMN_1684450	0.0021	0.000137	-3.91059	0.698253	-0.532659
ILMN_1690389	0.0021	0.000137	-3.91052	0.698013	-0.605881
ILMN_2057768	0.00211	0.000138	-3.90954	0.694588	-0.996868
ILMN_2402805	0.00211	0.000138	3.90916	0.693246	0.510307
ILMN_1794707	0.00211	0.000138	3.9082	0.689906	1.05771
ILMN_1744963	0.00212	0.000139	3.90749	0.687456	1.16933
ILMN_2398039	0.00212	0.000139	3.90727	0.68666	0.603443
ILMN_2138689	0.00212	0.000139	-3.90674	0.684829	-1.13159
ILMN_1757747	0.00212	0.000139	-3.90641	0.683678	-2.18248
ILMN_2357542	0.00212	0.000139	-3.90632	0.683366	-0.865006
ILMN_2173291	0.00212	0.000139	-3.9062	0.682937	-1.61233
ILMN_2381834	0.00212	0.000139	-3.90593	0.68199	-0.457433
ILMN_2163206	0.00213	0.00014	-3.90511	0.679132	-0.626391
ILMN_1790781	0.00213	0.00014	3.90488	0.678351	0.551441
ILMN_1694980	0.00214	0.000141	3.90295	0.671612	0.841591
ILMN_1662451	0.00214	0.000141	-3.90272	0.670811	-1.00207
ILMN_1704195	0.00215	0.000141	3.90233	0.669471	1.07047
ILMN_1728975	0.00215	0.000142	3.90104	0.664978	1.311
ILMN_1721888	0.00215	0.000142	-3.9009	0.664487	-1.04631
ILMN_1682938	0.00216	0.000143	3.89952	0.659654	0.608565
ILMN_1729287	0.00216	0.000143	-3.8994	0.659245	-1.05379
ILMN_1682120	0.00217	0.000143	-3.89888	0.657457	-1.36332
ILMN_1673676	0.00217	0.000143	-3.89876	0.657033	-1.45153
ILMN_1729868	0.00217	0.000143	-3.89847	0.656024	-1.07237
ILMN_2206732	0.00217	0.000144	-3.89823	0.655187	-1.62247
ILMN_2201596	0.00217	0.000144	-3.89786	0.653893	-0.882667
ILMN_1679971	0.00217	0.000144	-3.89783	0.653783	-1.30992
ILMN_1808657	0.00217	0.000144	-3.89674	0.649979	-1.35707
ILMN_1713450	0.00217	0.000144	3.89664	0.649657	1.24106
ILMN_1774387	0.00217	0.000145	3.89647	0.649036	0.596205
ILMN_2113738	0.00217	0.000145	-3.89647	0.649036	-1.0689
ILMN_2199843	0.00218	0.000145	-3.89587	0.646961	-0.247847
ILMN_1751092	0.00218	0.000145	-3.89557	0.645938	-0.695985
ILMN_1692169	0.00218	0.000145	-3.89519	0.644591	-1.28262
ILMN_1796663	0.00219	0.000146	3.89426	0.641364	1.41299
ILMN_2326712	0.00219	0.000146	3.89421	0.641206	0.961993
ILMN_2326953	0.00219	0.000146	3.89375	0.639588	1.02477
ILMN_2390472	0.00219	0.000146	3.89306	0.637205	0.65751
ILMN_2320964	0.00219	0.000146	3.89291	0.63667	1.19932
ILMN_1787109	0.00219	0.000147	3.89256	0.63544	0.849659
ILMN_1746436	0.00219	0.000147	-3.89255	0.635414	-1.16829
ILMN_2102580	0.00219	0.000147	-3.89246	0.635095	-0.737063
ILMN_1729288	0.00219	0.000147	3.89223	0.634305	1.19901
ILMN_1675844	0.0022	0.000148	3.8908	0.629349	0.828135
ILMN_2415157	0.00221	0.000148	-3.88991	0.626253	-0.855896
ILMN_2189614	0.00221	0.000148	-3.88991	0.626229	-0.695951
ILMN_2190942	0.00224	0.000151	3.88551	0.610978	0.790215
ILMN_1710303	0.00225	0.000151	-3.88514	0.609672	-0.927211
ILMN_2354140	0.00225	0.000151	3.88506	0.609409	0.433789
ILMN_1772644	0.00225	0.000151	3.88444	0.607272	0.410945
ILMN_1659820	0.00226	0.000152	-3.88351	0.604033	-1.37215
ILMN_1803300	0.00226	0.000152	-3.88228	0.599778	-0.759868
ILMN_2270299	0.00226	0.000153	-3.88217	0.599377	-0.54148
ILMN_1779412	0.00226	0.000153	-3.88201	0.59883	-1.40818
ILMN_2323801	0.00226	0.000153	-3.88191	0.598465	-0.57706
ILMN_1695353	0.00226	0.000153	-3.88161	0.59745	-0.426397
ILMN_1725696	0.00228	0.000154	3.87999	0.591826	0.899747
ILMN_1679267	0.00228	0.000154	3.87963	0.590577	1.22346
ILMN_1653447	0.00229	0.000155	-3.87775	0.584059	-1.30633
ILMN_1718336	0.00229	0.000155	3.87766	0.583757	0.940053
ILMN_2374352	0.0023	0.000155	3.87702	0.581507	0.728915
ILMN_2045270	0.0023	0.000156	-3.87698	0.581403	-1.76248
ILMN_1655482	0.0023	0.000156	3.87645	0.579535	0.549853
ILMN_1652413	0.0023	0.000156	-3.87601	0.578016	-0.649417
ILMN_1693853	0.00231	0.000157	3.87483	0.573946	0.541633
ILMN_1727107	0.00231	0.000157	3.87443	0.572548	0.691021
ILMN_1784780	0.00232	0.000157	3.87383	0.570475	0.637334
ILMN_1749341	0.00232	0.000158	-3.87351	0.569377	-1.56857
ILMN_1722900	0.00233	0.000159	3.87133	0.561813	0.685818
ILMN_1811592	0.00233	0.000159	3.87124	0.561512	0.832035
ILMN_1725485	0.00234	0.000159	3.87094	0.560466	1.34046
ILMN_1770963	0.00235	0.00016	-3.86942	0.555213	-0.77446
ILMN_1810942	0.00235	0.00016	3.86909	0.554079	1.14297
ILMN_1732189	0.00235	0.00016	-3.86893	0.553528	-0.381783
ILMN_1783266	0.00235	0.00016	-3.86888	0.553334	-1.47901
ILMN_1724893	0.00235	0.000161	-3.86831	0.551366	-0.580885
ILMN_2154101	0.00238	0.000162	3.86524	0.540779	1.1664
ILMN_1679232	0.00238	0.000163	-3.86464	0.538687	-0.75231
ILMN_2201905	0.00239	0.000163	-3.86396	0.536341	-0.630525
ILMN_1759003	0.0024	0.000164	3.86277	0.53222	0.73061
ILMN_2371984	0.0024	0.000164	3.8626	0.531629	1.15535
ILMN_2315208	0.0024	0.000165	-3.86152	0.527901	-1.22073
ILMN_1768533	0.00241	0.000165	-3.8611	0.526451	-1.05805
ILMN_1685761	0.00243	0.000167	-3.85843	0.517249	-0.612611
ILMN_1711030	0.00243	0.000167	3.85761	0.5144	0.951314
ILMN_2397954	0.00244	0.000168	3.85657	0.510834	0.965697
ILMN_1806492	0.00245	0.000169	-3.85515	0.505941	-1.18704
ILMN_1691436	0.00246	0.000169	3.85423	0.502756	0.64612
ILMN_1699265	0.00246	0.000169	3.85399	0.50193	0.97191
ILMN_1758731	0.00247	0.00017	-3.85327	0.499432	-1.12729
ILMN_2288483	0.00247	0.00017	-3.85282	0.497903	-0.499601
ILMN_2169439	0.00247	0.00017	3.85279	0.497787	1.19536
ILMN_2178186	0.00247	0.00017	-3.85258	0.49706	-0.729324
ILMN_1726565	0.00247	0.000171	3.8519	0.494716	1.43298
ILMN_1799622	0.00248	0.000171	-3.85107	0.491875	-0.865221
ILMN_1754864	0.00248	0.000171	-3.85086	0.491121	-1.79739
ILMN_1743067	0.00248	0.000172	-3.85041	0.489573	-0.467905
ILMN_1756328	0.00249	0.000172	-3.84929	0.48572	-0.536894
ILMN_1780952	0.00249	0.000173	-3.84907	0.484978	-0.658281
ILMN_1666887	0.00249	0.000173	-3.84893	0.484475	-0.648006
ILMN_1697081	0.0025	0.000173	-3.84793	0.481037	-0.941592
ILMN_2370019	0.00251	0.000174	-3.84659	0.476436	-1.3187
ILMN_1654773	0.00252	0.000175	3.84538	0.472268	1.22576
ILMN_1764854	0.00252	0.000175	3.84526	0.471862	0.759772
ILMN_2344907	0.00252	0.000175	-3.84516	0.471494	-1.15555
ILMN_1675626	0.00252	0.000175	3.84501	0.470974	0.676488
ILMN_1718248	0.00252	0.000175	-3.84479	0.470244	-0.849755
ILMN_2206098	0.00254	0.000176	-3.84312	0.464493	-0.784184
ILMN_1803254	0.00254	0.000177	-3.84273	0.463165	-0.560419
ILMN_1811380	0.00254	0.000177	-3.84266	0.462894	-0.944716
ILMN_1796628	0.00254	0.000177	3.84227	0.461577	0.730437
ILMN_1691164	0.00254	0.000177	-3.84212	0.461064	-0.7779
ILMN_1752895	0.00255	0.000178	3.84027	0.454702	0.599683
ILMN_2116242	0.00256	0.000179	-3.83959	0.452343	-0.643286
ILMN_1772848	0.00256	0.000179	-3.8393	0.451367	-0.884482
ILMN_2190850	0.00256	0.000179	-3.8393	0.451356	-0.671704
ILMN_1676099	0.00257	0.00018	3.83785	0.44637	1.47768
ILMN_1699160	0.00258	0.00018	-3.83706	0.443649	-1.08682
ILMN_1801666	0.00258	0.000181	-3.83661	0.442105	-0.864031
ILMN_1688152	0.00258	0.000181	-3.83605	0.440189	-0.860383
ILMN_2415979	0.0026	0.000182	-3.83431	0.434223	-0.589361
ILMN_1704206	0.0026	0.000183	-3.83393	0.432909	-0.597237
ILMN_1686534	0.0026	0.000183	-3.8334	0.431075	-0.607789
ILMN_2059780	0.0026	0.000183	-3.83338	0.431009	-0.752271
ILMN_2072603	0.00261	0.000183	3.83315	0.430239	1.32397
ILMN_1815859	0.00261	0.000184	3.83225	0.42715	1.07439
ILMN_1661804	0.00262	0.000184	-3.83156	0.424787	-0.952706
ILMN_1738277	0.00262	0.000184	-3.83115	0.423381	-0.874032
ILMN_1679826	0.00262	0.000185	-3.83103	0.422939	-0.908178
ILMN_1689702	0.00262	0.000185	-3.83073	0.421929	-1.07029
ILMN_1655269	0.00263	0.000186	-3.82966	0.418255	-1.76461
ILMN_1721247	0.00264	0.000186	-3.82835	0.413759	-1.45521
ILMN_1693523	0.00264	0.000187	-3.82783	0.411964	-0.971807
ILMN_1702821	0.00265	0.000187	-3.82765	0.411361	-1.36507
ILMN_2078404	0.00265	0.000187	-3.8268	0.408448	-0.927956
ILMN_2383124	0.00265	0.000188	-3.82644	0.407227	-1.46126
ILMN_1812701	0.00266	0.000189	3.82532	0.403369	0.696673
ILMN_2347949	0.00267	0.000189	3.82477	0.401507	1.11521
ILMN_1698715	0.00267	0.000189	3.82452	0.400648	0.899379
ILMN_2273595	0.00267	0.000189	-3.82411	0.399219	-0.721658
ILMN_2092903	0.00267	0.00019	-3.82392	0.398587	-1.25583
ILMN_1802096	0.00267	0.00019	3.82391	0.398545	0.444393
ILMN_1679133	0.00267	0.00019	3.82349	0.397119	1.04382
ILMN_1680626	0.00268	0.00019	3.82269	0.39438	0.638543
ILMN_2276002	0.00268	0.00019	3.82256	0.393919	0.960009
ILMN_1757411	0.00268	0.000191	-3.82245	0.393556	-0.405561
ILMN_1808059	0.00268	0.000191	3.82191	0.391673	0.762876
ILMN_1690826	0.00268	0.000191	3.8218	0.391317	1.15892
ILMN_1683905	0.00269	0.000192	3.8206	0.387221	0.783152
ILMN_1735260	0.0027	0.000192	-3.81984	0.384597	-1.59255
ILMN_1808095	0.0027	0.000193	3.81927	0.382651	0.710414
ILMN_1697444	0.0027	0.000193	-3.819	0.381719	-1.31569
ILMN_2355004	0.0027	0.000193	3.81872	0.380769	0.61644
ILMN_1749317	0.0027	0.000193	-3.81861	0.380403	-0.44067
ILMN_2377733	0.00271	0.000194	3.81809	0.378618	0.830263
ILMN_2262044	0.00271	0.000194	3.81805	0.378468	0.397951
ILMN_1706539	0.00272	0.000195	3.81686	0.374401	0.57799
ILMN_1669802	0.00272	0.000195	-3.816	0.371478	-2.18251
ILMN_2105253	0.00273	0.000196	-3.81547	0.369655	-0.876189
ILMN_2070300	0.00273	0.000196	3.81478	0.367299	0.676415
ILMN_1796074	0.00273	0.000196	3.8145	0.366327	1.16026
ILMN_2370692	0.00274	0.000197	3.81334	0.362359	0.747757
ILMN_2260926	0.00274	0.000197	-3.81332	0.362298	-0.984905
ILMN_1715125	0.00274	0.000197	-3.81313	0.361646	-0.526343
ILMN_1732948	0.00275	0.000198	-3.81262	0.359895	-0.586539
ILMN_1710590	0.00275	0.000198	-3.81255	0.35967	-0.985327
ILMN_1791587	0.00275	0.000198	-3.81208	0.358051	-0.828141
ILMN_1660890	0.00276	0.000199	-3.81085	0.35385	-0.493719
ILMN_1747586	0.00278	0.000201	-3.80857	0.34607	-0.856041
ILMN_2111237	0.00279	0.000201	3.8079	0.343791	1.0405
ILMN_2183510	0.00279	0.000201	3.80783	0.343568	0.449984
ILMN_1658677	0.00279	0.000201	3.80764	0.34289	0.949037
ILMN_1676665	0.0028	0.000202	3.80655	0.339184	1.2884
ILMN_1658187	0.0028	0.000202	-3.80636	0.338526	-0.751417
ILMN_2267135	0.0028	0.000202	-3.80609	0.337621	-1.29759
ILMN_2269392	0.0028	0.000203	-3.80563	0.336035	-0.699187
ILMN_1677814	0.00281	0.000203	3.80496	0.333768	1.45711
ILMN_1724754	0.00281	0.000204	-3.80443	0.331958	-0.643212
ILMN_1768117	0.00282	0.000205	3.80327	0.327996	0.840558
ILMN_1695812	0.00282	0.000205	-3.80302	0.32713	-1.03485
ILMN_1806908	0.00282	0.000205	-3.80292	0.3268	-1.54461
ILMN_1744508	0.00283	0.000206	3.80192	0.323384	0.617218
ILMN_1664773	0.00283	0.000206	3.80189	0.323275	1.37849
ILMN_2170353	0.00283	0.000206	3.80152	0.322028	1.1104
ILMN_1774974	0.00284	0.000206	3.801	0.320265	0.711738
ILMN_1665011	0.00284	0.000206	-3.80087	0.319793	-0.579893
ILMN_1727540	0.00285	0.000208	3.79935	0.31461	0.636254
ILMN_2388975	0.00285	0.000208	3.79934	0.314583	1.18893
ILMN_1668533	0.00285	0.000208	-3.79933	0.314571	-0.534653
ILMN_1790744	0.00285	0.000208	-3.79919	0.314096	-0.394362
ILMN_2359627	0.00285	0.000208	3.79845	0.311551	0.738284
ILMN_2415722	0.00285	0.000208	-3.79821	0.310737	-0.632741
ILMN_1714563	0.00286	0.000209	3.79766	0.308882	0.571861
ILMN_1767244	0.00286	0.000209	-3.79732	0.3077	-1.74124
ILMN_1708159	0.00286	0.000209	3.79692	0.306344	1.0086
ILMN_1654459	0.00286	0.000209	-3.79691	0.306309	-0.9042
ILMN_1755134	0.00287	0.00021	3.79622	0.30395	0.885502
ILMN_1738819	0.00287	0.00021	3.79582	0.302586	0.868632
ILMN_1701514	0.00288	0.000211	3.79426	0.297303	0.893294
ILMN_1748189	0.00289	0.000212	-3.79344	0.294501	-0.466962
ILMN_1744293	0.0029	0.000213	-3.79279	0.292283	-1.69113
ILMN_1794595	0.0029	0.000213	-3.79214	0.290083	-1.32351
ILMN_1777665	0.0029	0.000213	-3.79201	0.28964	-0.508069
ILMN_1693230	0.0029	0.000214	-3.79161	0.288281	-0.891803
ILMN_1695549	0.00291	0.000214	-3.79138	0.287496	-0.628278
ILMN_2181432	0.00291	0.000214	3.79089	0.285837	0.788951
ILMN_2415235	0.00291	0.000214	3.79071	0.285208	0.587701
ILMN_1670931	0.00291	0.000214	3.7906	0.284835	0.948463
ILMN_1731157	0.00291	0.000215	-3.79038	0.284105	-1.45645
ILMN_1665004	0.00291	0.000215	-3.79007	0.283053	-0.959125
ILMN_2381476	0.00291	0.000215	3.79004	0.28292	0.930093
ILMN_2394250	0.00291	0.000215	3.7899	0.282444	1.00697
ILMN_1750188	0.00292	0.000216	-3.7886	0.278049	-1.10612
ILMN_1741017	0.00293	0.000216	3.78812	0.276407	1.03692
ILMN_1750599	0.00293	0.000217	-3.7876	0.274644	-0.524843
ILMN_2374383	0.00293	0.000217	3.78705	0.272764	0.743399
ILMN_1693789	0.00294	0.000218	-3.78628	0.27015	-0.85422
ILMN_1792314	0.00294	0.000218	3.78625	0.270035	0.805559
ILMN_2180371	0.00294	0.000218	-3.7862	0.269878	-1.03972
ILMN_1766896	0.00295	0.000219	-3.78535	0.266991	-1.25743
ILMN_1765021	0.00296	0.000219	3.78442	0.263833	1.26826
ILMN_1739734	0.00298	0.000221	-3.78232	0.256707	-0.372715
ILMN_1769158	0.00298	0.000222	3.78144	0.25371	0.721999
ILMN_1738700	0.00299	0.000222	-3.78077	0.251456	-0.645826
ILMN_1741954	0.00301	0.000224	3.77875	0.244579	0.793484
ILMN_1771801	0.00301	0.000224	-3.77851	0.24378	-0.66862
ILMN_1786326	0.00302	0.000225	3.77785	0.241548	0.831195
ILMN_1734878	0.00305	0.000227	-3.77515	0.232396	-1.08159
ILMN_1795933	0.00308	0.000229	3.77211	0.222071	0.846045
ILMN_1728301	0.0031	0.000231	-3.77045	0.216442	-1.9594
ILMN_1749345	0.0031	0.000231	3.77001	0.214958	0.793694
ILMN_2289887	0.0031	0.000231	-3.76982	0.214321	-1.34306
ILMN_1724495	0.0031	0.000232	3.7694	0.212911	0.909979
ILMN_1666512	0.00311	0.000233	3.76848	0.209798	1.24965
ILMN_1702613	0.00311	0.000233	-3.76796	0.208015	-0.668318
ILMN_2130158	0.00311	0.000233	-3.76787	0.207705	-0.589552
ILMN_2081210	0.00313	0.000235	3.76594	0.20121	0.692908
ILMN_1807211	0.00315	0.000236	3.76474	0.19712	0.861231
ILMN_1730019	0.00317	0.000237	3.76274	0.190355	0.59984
ILMN_1731193	0.00317	0.000238	-3.76227	0.188794	-1.63048
ILMN_2091792	0.00317	0.000238	3.76192	0.187613	0.879196
ILMN_1762526	0.00317	0.000238	-3.76183	0.187297	-1.45078
ILMN_2263236	0.00318	0.000239	-3.761	0.184501	-0.68888
ILMN_1681016	0.00318	0.000239	3.76089	0.184125	0.58464
ILMN_1805778	0.00319	0.00024	3.76038	0.182394	0.745263
ILMN_1684320	0.00319	0.00024	-3.76001	0.181159	-1.62236
ILMN_1738539	0.00319	0.00024	3.75987	0.180658	0.844814
ILMN_2253017	0.00319	0.00024	-3.75942	0.179141	-1.21058
ILMN_1789094	0.0032	0.000241	3.75848	0.175976	1.06465
ILMN_1733256	0.00322	0.000242	3.75711	0.171351	0.743921
ILMN_1802699	0.00323	0.000243	-3.75609	0.167905	-1.08197
ILMN_1710216	0.00323	0.000243	3.75589	0.167217	0.653533
ILMN_2288915	0.00323	0.000244	3.7558	0.166921	0.76777
ILMN_1789059	0.00323	0.000244	3.75516	0.164765	0.965767
ILMN_1684554	0.00323	0.000244	3.75497	0.164136	0.871379
ILMN_2404512	0.00324	0.000245	3.75455	0.162696	1.04884
ILMN_1791905	0.00324	0.000245	-3.7541	0.161199	-0.953523
ILMN_1678061	0.00325	0.000246	-3.75288	0.157077	-0.889393
ILMN_1653146	0.00325	0.000246	-3.75284	0.156924	-1.52323
ILMN_1687390	0.00326	0.000247	-3.75214	0.15457	-1.10701
ILMN_1747716	0.00326	0.000247	-3.75191	0.15379	-2.19449
ILMN_2362439	0.00326	0.000247	-3.75173	0.153193	-0.790253
ILMN_1666827	0.00326	0.000247	-3.75156	0.152618	-0.743362
ILMN_1699206	0.00326	0.000248	-3.75101	0.150754	-0.45429
ILMN_1813120	0.00326	0.000248	3.75082	0.150119	0.804369
ILMN_1771903	0.00328	0.000249	3.74969	0.146313	0.843721
ILMN_1797813	0.00328	0.000249	3.74935	0.145187	0.994649
ILMN_1762337	0.00328	0.00025	3.74889	0.143608	0.891403
ILMN_2381730	0.00328	0.00025	3.74872	0.14304	0.641843
ILMN_2385173	0.00328	0.00025	3.74862	0.142704	0.749616
ILMN_1712729	0.00328	0.00025	-3.74858	0.142578	-1.05606
ILMN_1713753	0.00328	0.00025	-3.74833	0.141746	-0.598203
ILMN_1715332	0.00328	0.000251	-3.74785	0.140112	-1.28971
ILMN_1740770	0.00328	0.000251	3.74775	0.139766	0.583297
ILMN_1780762	0.00329	0.000251	-3.74736	0.138459	-0.618014
ILMN_2129734	0.0033	0.000252	-3.74632	0.134952	-0.984321
ILMN_2097421	0.0033	0.000252	3.74619	0.134509	0.7006
ILMN_1695604	0.0033	0.000253	3.74589	0.13352	0.898186
ILMN_1698731	0.0033	0.000253	-3.74551	0.132241	-1.43315
ILMN_1758606	0.0033	0.000253	-3.7455	0.13221	-0.392137
ILMN_1676973	0.00331	0.000253	-3.74501	0.130557	-0.669014
ILMN_2064311	0.00331	0.000254	-3.74429	0.128124	-0.753795
ILMN_1758939	0.00332	0.000255	3.74372	0.126218	0.646458
ILMN_1733669	0.00333	0.000256	-3.74215	0.120936	-1.26815
ILMN_1678669	0.00333	0.000256	3.742	0.120429	0.988783
ILMN_1680856	0.00334	0.000256	3.74172	0.119473	0.564897
ILMN_2322356	0.00334	0.000257	-3.74142	0.118454	-0.698551
ILMN_1784863	0.00334	0.000257	-3.74124	0.117848	-1.00974
ILMN_1709894	0.00334	0.000257	-3.741	0.117074	-0.588558
ILMN_1721729	0.00334	0.000257	3.74089	0.116681	0.529608
ILMN_2059844	0.00334	0.000257	-3.74089	0.11668	-0.939301
ILMN_2358914	0.00334	0.000257	3.74068	0.115975	0.848132
ILMN_1740161	0.00334	0.000258	-3.74051	0.115409	-1.33131
ILMN_1735693	0.00334	0.000258	-3.74023	0.11448	-0.749143
ILMN_2058841	0.00334	0.000258	-3.74014	0.114161	-0.840392
ILMN_1776094	0.00334	0.000258	3.74006	0.113889	1.13059
ILMN_1687655	0.00334	0.000258	-3.73998	0.11363	-0.909026
ILMN_1710523	0.00334	0.000258	3.73996	0.113559	1.25439
ILMN_1675239	0.00334	0.000259	3.73945	0.111861	0.763118
ILMN_1735038	0.00334	0.000259	-3.73919	0.110964	-1.41266
ILMN_1768425	0.00334	0.000259	-3.73906	0.110533	-1.68932
ILMN_2404320	0.00334	0.000259	-3.73871	0.109359	-1.05878
ILMN_1741131	0.00335	0.00026	3.73789	0.106586	1.03107
ILMN_2366972	0.00336	0.000261	-3.73686	0.103126	-1.25439
ILMN_1711346	0.00337	0.000261	-3.73655	0.102102	-1.16486
ILMN_2299843	0.00338	0.000262	-3.73565	0.099071	-0.673545
ILMN_1705783	0.00338	0.000262	3.7355	0.098563	0.868654
ILMN_1652464	0.00339	0.000264	-3.73383	0.092947	-0.636771
ILMN_1652790	0.00342	0.000266	3.73153	0.085225	0.530931
ILMN_2197990	0.00342	0.000266	-3.73128	0.084404	-1.11746
ILMN_1663281	0.00343	0.000267	-3.73023	0.080871	-0.808102
ILMN_1717888	0.00344	0.000268	-3.72987	0.079662	-1.70382
ILMN_1721916	0.00344	0.000268	-3.72973	0.079174	-1.83117
ILMN_1772216	0.00344	0.000268	3.72929	0.077722	0.809513
ILMN_1787931	0.00344	0.000269	-3.72905	0.076898	-0.633699
ILMN_2383913	0.00344	0.000269	3.72902	0.076794	0.734339
ILMN_1777579	0.00346	0.00027	-3.72724	0.070824	-0.903147
ILMN_1789233	0.00348	0.000272	3.72553	0.065087	1.03172
ILMN_1794967	0.00348	0.000272	3.72533	0.064425	0.651814
ILMN_2172890	0.00349	0.000273	-3.72478	0.062577	-0.504286
ILMN_1676737	0.00349	0.000273	3.7247	0.062317	0.572923
ILMN_1662824	0.00349	0.000273	-3.72411	0.06035	-0.605463
ILMN_1808683	0.00349	0.000273	-3.72404	0.060092	-0.527306
ILMN_2141455	0.00349	0.000274	-3.72392	0.059701	-0.666222
ILMN_1711166	0.00349	0.000274	-3.72366	0.058843	-1.31506
ILMN_1774735	0.00352	0.000276	3.72119	0.050563	0.973896
ILMN_1767365	0.00352	0.000277	3.72077	0.049139	0.698197
ILMN_1743445	0.00352	0.000277	-3.72061	0.04863	-0.503278
ILMN_1813344	0.00354	0.000278	3.71917	0.043779	0.705322
ILMN_2054261	0.00354	0.000279	-3.71902	0.043284	-0.397831
ILMN_1674344	0.00354	0.000279	-3.71862	0.041955	-0.80955
ILMN_1768062	0.00356	0.00028	3.7176	0.038537	0.828913
ILMN_1807283	0.00356	0.000281	3.71678	0.03579	0.759345
ILMN_1671437	0.00356	0.000281	-3.71664	0.035308	-0.897556
ILMN_1766346	0.00356	0.000281	3.7166	0.035209	0.696953
ILMN_1702241	0.00356	0.000281	-3.71659	0.035157	-1.42913
ILMN_1665686	0.00356	0.000281	3.71657	0.035096	0.942564
ILMN_2298611	0.00356	0.000281	-3.71644	0.034657	-0.867685
ILMN_1669553	0.00356	0.000281	3.71633	0.034276	0.770729
ILMN_2206151	0.00357	0.000282	3.71575	0.032361	0.82763
ILMN_2402817	0.00357	0.000282	-3.71555	0.031687	-1.48389
ILMN_1788689	0.00357	0.000283	3.71496	0.02972	0.728514
ILMN_1715703	0.00357	0.000283	-3.71485	0.029325	-1.27964
ILMN_1683273	0.00357	0.000283	3.71456	0.028372	0.66436
ILMN_2150402	0.00358	0.000284	-3.71391	0.026187	-0.430604
ILMN_1730492	0.00359	0.000284	-3.71325	0.023973	-0.298259
ILMN_2147993	0.00359	0.000285	3.7131	0.023471	0.418482
ILMN_1798224	0.00359	0.000285	3.71279	0.022463	0.806962
ILMN_1741371	0.0036	0.000286	3.71181	0.019179	0.885687
ILMN_2396639	0.0036	0.000286	3.71154	0.018272	1.14148
ILMN_1766712	0.00361	0.000287	-3.71088	0.016056	-1.25639
ILMN_1800317	0.00361	0.000287	3.71075	0.015631	1.15134
ILMN_1784256	0.00361	0.000287	3.71059	0.015097	0.849236
ILMN_1764043	0.00361	0.000287	3.71056	0.014987	0.525613
ILMN_1731418	0.00361	0.000287	3.71046	0.014676	1.30432
ILMN_1736969	0.00362	0.000289	-3.70902	0.009838	-0.749963
ILMN_1665040	0.00363	0.00029	-3.70805	0.006624	-0.8378
ILMN_2211546	0.00363	0.00029	-3.70789	0.00606	-0.475244
ILMN_1807464	0.00364	0.00029	-3.70764	0.005258	-1.02458
ILMN_2408730	0.00364	0.000291	3.70728	0.004054	1.08412
ILMN_1736178	0.00364	0.000291	3.70683	0.002552	0.905507
ILMN_1698608	0.00365	0.000292	-3.70645	0.001259	-1.06157
ILMN_1779470	0.00365	0.000292	-3.70636	0.000981	-1.00206
ILMN_1696867	0.00365	0.000292	-3.70567	-0.00132	-0.897469
ILMN_1782897	0.00365	0.000293	3.70553	-0.001795	1.17998
ILMN_1691717	0.00367	0.000294	3.70435	-0.005743	1.32312
ILMN_1725250	0.00367	0.000294	3.70417	-0.006357	0.640506
ILMN_1673917	0.00369	0.000296	3.70226	-0.012723	1.01263
ILMN_2188384	0.00369	0.000296	-3.70214	-0.013095	-0.551022
ILMN_1757845	0.0037	0.000297	3.70102	-0.016855	0.962616
ILMN_1782761	0.00371	0.000298	-3.70009	-0.01996	-0.537652
ILMN_2407464	0.00371	0.000298	3.7	-0.020255	0.592101
ILMN_1804498	0.00371	0.000299	3.69985	-0.020737	0.665583
ILMN_1679995	0.00371	0.000299	3.6998	-0.020917	1.17453
ILMN_2343624	0.00371	0.000299	3.69975	-0.021073	0.930385
ILMN_2225974	0.00372	0.0003	-3.69896	-0.02372	-0.955591
ILMN_1743680	0.00372	0.0003	-3.69859	-0.02496	-0.684032
ILMN_1778267	0.00374	0.000302	-3.69711	-0.029878	-0.480105
ILMN_1663664	0.00374	0.000302	3.69689	-0.030616	0.931689
ILMN_1811754	0.00374	0.000302	3.69681	-0.03087	0.952288
ILMN_1711909	0.00375	0.000303	3.69616	-0.033057	0.68988
ILMN_2132309	0.00375	0.000303	-3.69585	-0.034077	-1.13176
ILMN_1692511	0.00375	0.000303	3.69551	-0.035207	0.56352
ILMN_2321578	0.00376	0.000304	-3.69522	-0.036165	-0.420835
ILMN_1671742	0.00376	0.000304	3.69481	-0.037534	0.669755
ILMN_1812262	0.00378	0.000306	3.69279	-0.044272	0.78363
ILMN_1708095	0.00379	0.000307	3.69205	-0.046727	0.941072
ILMN_2358647	0.00379	0.000307	3.69197	-0.046993	0.728041
ILMN_1734353	0.0038	0.000308	3.69148	-0.048615	0.632349
ILMN_2200738	0.0038	0.000308	-3.69084	-0.050751	-0.769329
ILMN_1797933	0.00381	0.000309	3.69037	-0.052298	0.634912
ILMN_1682941	0.00381	0.000309	-3.69013	-0.053118	-1.01917
ILMN_2413537	0.00381	0.000309	-3.69009	-0.053248	-0.567499
ILMN_1656902	0.00381	0.00031	3.68954	-0.055089	0.860599
ILMN_2394102	0.00382	0.000311	-3.68878	-0.057601	-0.628295
ILMN_1698996	0.00382	0.000311	3.68874	-0.057729	0.985279
ILMN_1778673	0.00383	0.000312	3.68813	-0.059762	0.954933
ILMN_1684614	0.00383	0.000312	-3.68798	-0.060269	-0.961826
ILMN_1769538	0.00384	0.000313	-3.68718	-0.062932	-0.784055
ILMN_1660125	0.00384	0.000313	3.68709	-0.063209	0.901326
[truncated: 22,527 more rows]

## Sheet: GSE76297
ID	adj.P.Val	P.Value	t	B	logFC	SPOT_ID
TC12002256.hg.1	3.8e-62	2.98e-64	26.3215	135.959	4.9445	chr12(+):13068126-13070865
TC01001720.hg.1	5.81e-46	1.33e-47	19.8555	97.6622	4.61783	chr1(+):206317459-206332104
TC02000293.hg.1	8.76e-74	2.5e-76	31.6581	163.705	4.14567	chr2(+):47572297-47614740
TC12000182.hg.1	9.34e-59	9.39e-61	24.8869	127.916	4.14034	chr12(+):13043716-13070871
TC03002078.hg.1	1.34e-56	1.58e-58	23.9973	122.799	4.10816	chr3(-):185224050-185270401
TC0X001190.hg.1	3.11e-65	1.9e-67	27.6737	143.307	4.00136	chrX(-):84532395-84634748
TC03001719.hg.1	3.67e-43	1e-44	18.8183	91.0413	3.96791	chr3(-):124624289-124672663
TC04000880.hg.1	3.31e-71	1.19e-73	30.4189	157.555	3.94513	chr4(+):182443813-182444154
TC07002496.hg.1	2.08e-22	2.2e-23	11.4928	41.9889	3.8934	chr7(+):100678736-100679444
TC05000218.hg.1	9.11e-64	6.43e-66	27.0213	139.79	3.78612	chr5(+):52285156-52390609
TC07002185.hg.1	5.47e-51	9.22e-53	21.7677	109.533	3.75623	chr7(+):20453914-20455377
TC6_qbl_hap6000166.hg.1	3.54e-49	6.63e-51	21.0711	105.261	3.66078	chr6_qbl_hap6
TC6_apd_hap1000090.hg.1	3.89e-49	7.29e-51	21.0557	105.166	3.65909	chr6_apd_hap1
TC6_ssto_hap7000145.hg.1	3.89e-49	7.29e-51	21.0557	105.166	3.65909	chr6_ssto_hap7
TC6_mcf_hap5000151.hg.1	3.99e-49	7.5e-51	21.0513	105.138	3.65884	chr6_mcf_hap5
TC19000583.hg.1	3.03e-30	1.92e-31	14.2241	60.4979	3.65496	chr19(+):42212504-42234437
TC16000214.hg.1	3.29e-59	3.18e-61	25.0773	128.998	3.64412	chr16(+):19421861-19510435	TMC5
TC06001549.hg.1	3.39e-49	6.34e-51	21.0784	105.306	3.60887	chr6(-):31830969-31846823
TC6_cox_hap2000176.hg.1	3.39e-49	6.34e-51	21.0784	105.306	3.60887	chr6_cox_hap2
TC6_dbb_hap3000165.hg.1	3.53e-49	6.62e-51	21.0715	105.263	3.60808	chr6_dbb_hap3
TC16001225.hg.1	8.42e-55	1.14e-56	23.2663	118.519	3.59979	chr16(-):69743304-69760707
TC07002818.hg.1	1.29e-56	1.52e-58	24.0037	122.836	3.58256	chr7(-):20179588-20180103
TC07002495.hg.1	1.85e-21	2.09e-22	11.158	39.7482	3.54516	chr7(+):100677704-100680561
TC03003290.hg.1	7.11e-26	5.98e-27	12.7045	50.1724	3.46186	chr3(-):195513847-195514331
TC14001693.hg.1	1.36e-68	6.18e-71	29.1964	151.319	3.38408	chr14(+):55603701-55612148
TC11000329.hg.1	5.89e-70	2.42e-72	29.8256	154.549	3.34743	chr11(+):34642588-34684834
TC07001182.hg.1	7.49e-55	1.01e-56	23.2875	118.644	3.34447	chr7(-):20174279-20257027
TC06000675.hg.1	6.39e-52	1.01e-53	22.1314	111.741	3.34007	chr6(+):54711569-54806880
TC13000576.hg.1	9.51e-51	1.63e-52	21.6745	108.965	3.31881	chr13(-):38136719-38183563
TC01006383.hg.1	1.94e-51	3.17e-53	21.9434	110.601	3.28114	chr1(-):155158300-155162707
TC17002906.hg.1	4.92e-57	5.62e-59	24.1751	123.83	3.27306	chr17(-):39679869-39684641
TC04002100.hg.1	8.89e-35	4.17e-36	15.8101	71.2175	3.26472	chr4(+):88896901-88901613
TC15002610.hg.1	5.75e-78	9.45e-81	33.7798	173.851	3.25905	chr15(-):72502751-72523556
TC19000584.hg.1	1.35e-30	8.33e-32	14.3465	61.3289	3.18888	chr19(+):42259329-42276113
TC08000575.hg.1	2.78e-66	1.56e-68	28.1422	145.802	3.15586	chr8(+):95653302-95719694
TC01001585.hg.1	7.87e-49	1.51e-50	20.9379	104.437	3.15492	chr1(+):183155174-183214262
TC05000412.hg.1	4.72e-53	7.05e-55	22.5739	114.403	3.1351	chr5(+):82767284-82878122
TC15002176.hg.1	7.38e-47	1.62e-48	20.1899	99.7701	3.13234	chr15(+):43891126-43891600
TC04000437.hg.1	5.61e-63	4.16e-65	26.6793	137.925	3.12335	chr4(+):79472673-79531605
TC04000478.hg.1	1.63e-33	8.33e-35	15.3655	68.2256	3.11391	chr4(+):88896802-88904563
TC08000456.hg.1	1.66e-57	1.82e-59	24.3699	124.954	3.09216	chr8(+):70378859-70573150
TC13000273.hg.1	6.41e-65	4.03e-67	27.5335	142.556	3.01951	chr13(+):73629114-73651676
TC07000125.hg.1	5.06e-51	8.5e-53	21.7811	109.615	3.0195	chr7(+):20370325-20455382
TC07000235.hg.1	6.89e-61	5.94e-63	25.7835	132.973	3.01422	chr7(+):36429415-36493400
TC09002617.hg.1	1.75e-49	3.2e-51	21.189	105.988	2.99606	chr9(-):85594505-85597351
TC11002228.hg.1	1.95e-28	1.39e-29	13.5954	56.2257	2.98454	chr11(-):102391239-102401484
TC06002615.hg.1	1.47e-52	2.24e-54	22.3814	113.248	2.98032	chr6(+):21597661-21598850
TC03003201.hg.1	2.54e-53	3.72e-55	22.6808	115.042	2.96714	chr3(-):168849202-168849668
TC01005719.hg.1	3.9e-37	1.57e-38	16.6439	76.7926	2.96198	chr1(-):114420790-114430081
TC03003289.hg.1	7.44e-24	7.13e-25	12.0005	45.4064	2.9603	chr3(-):195505666-195505928
TC10001535.hg.1	8.32e-64	5.83e-66	27.0394	139.888	2.93634	chr10(-):95066186-95242074
TC0X000571.hg.1	9.86e-27	7.86e-28	13.0026	52.1964	2.92099	chrX(+):115567747-115592625
TC13000228.hg.1	3.65e-19	4.87e-20	10.3387	34.3237	2.91078	chr13(+):53602830-53626196
TC17001462.hg.1	8.13e-55	1.1e-56	23.2726	118.556	2.89871	chr17(-):38544768-38574408
TC07001559.hg.1	2.05e-55	2.61e-57	23.5168	119.994	2.89361	chr7(-):80371854-80551675
TC0X000529.hg.1	2.17e-24	2.02e-25	12.187	46.6662	2.88323	chrX(+):107288200-107322414
TC17002618.hg.1	9.81e-55	1.34e-56	23.2396	118.361	2.83508	chr17(-):38573069-38574167
TC04001570.hg.1	1.51e-41	4.58e-43	18.2288	87.2254	2.7924	chr4(-):139085248-139163503
TC10001756.hg.1	9.84e-59	9.9e-61	24.8776	127.863	2.7919	chr10(-):129894923-129924649
TC07001163.hg.1	4.2e-34	2.05e-35	15.5732	69.6245	2.78995	chr7(-):16831435-16873057
TC02002504.hg.1	1.94e-57	2.15e-59	24.341	124.788	2.76631	chr2(-):168810530-169104651
TC01003007.hg.1	1.81e-38	6.71e-40	17.1185	79.9416	2.76225	chr1(-):114419436-114430169
TC07002494.hg.1	2.68e-25	2.34e-26	12.5038	48.8109	2.7603	chr7(+):100643194-100644666
TC03000930.hg.1	1.09e-66	5.84e-69	28.3276	146.781	2.75933	chr3(+):172468472-172539264
TC09002547.hg.1	1.14e-22	1.19e-23	11.5842	42.6024	2.73532	chr9(-):66688088-66699951
TC01005848.hg.1	9.94e-46	2.32e-47	19.7678	97.1075	2.71777	chr1(-):155161994-155162707
TC05002612.hg.1	4.58e-39	1.63e-40	17.3322	81.3523	2.65741	chr5(+):127522490-127522778
TC08001887.hg.1	3.18e-66	1.79e-68	28.1161	145.663	2.65492	chr8(+):38854505-38962779
TC07002629.hg.1	9.16e-20	1.17e-20	10.5544	35.7426	2.65403	chr7(+):141870970-141923474
TC05001911.hg.1	5.25e-28	3.84e-29	13.4459	55.2096	2.64624	chr5(-):147204131-147211349
TC06002842.hg.1	7.42e-45	1.84e-46	19.4418	95.0366	2.63325	chr6(+):54808168-54809897
TC12001269.hg.1	8.06e-47	1.77e-48	20.1755	99.6796	2.63028	chr12(-):14656595-14721283
TC15002609.hg.1	4.58e-73	1.4e-75	31.308	161.985	2.61752	chr15(-):72494793-72499118
TC06001355.hg.1	4.11e-44	1.07e-45	19.1669	93.2801	2.6057	chr6(-):26281283-26285762
TC05002611.hg.1	5.63e-41	1.77e-42	18.0213	85.8735	2.60524	chr5(+):127487042-127516674
TC07002463.hg.1	2.2e-48	4.35e-50	20.7679	103.382	2.60421	chr7(+):94047825-94049905
TC17001632.hg.1	1.6e-41	4.88e-43	18.2191	87.1621	2.59882	chr17(-):46029334-46035110
TC05000937.hg.1	1.95e-20	2.36e-21	10.795	37.3335	2.59532	chr5(+):170190354-170241051
TC09001154.hg.1	1.01e-22	1.05e-23	11.6031	42.7297	2.58414	chr9(-):66688086-66699951
TC18000716.hg.1	2.06e-38	7.65e-40	17.0988	79.8107	2.58339	chr18(+):52559875-52562337
TC06001350.hg.1	1.64e-65	9.8e-68	27.7969	143.966	2.58166	chr6(-):26216428-26216872
TC07000559.hg.1	9.87e-49	1.91e-50	20.9006	104.206	2.57628	chr7(+):94023873-94060544
TC04001283.hg.1	4.85e-22	5.27e-23	11.3633	41.121	2.57165	chr4(-):74861359-74864496
TC6_apd_hap1000067.hg.1	3.02e-30	1.91e-31	14.2245	60.5012	2.56598	chr6_apd_hap1
TC20000603.hg.1	8.09e-46	1.87e-47	19.8016	97.3213	2.55307	chr20(-):6055492-6104191
TC15000456.hg.1	5.39e-31	3.23e-32	14.4857	62.2738	2.5523	chr15(+):59891842-59913023
TC02000861.hg.1	4.37e-73	1.32e-75	31.32	162.044	2.54	chr2(+):132442470-132457442
TC02002492.hg.1	1.32e-48	2.56e-50	20.8532	103.912	2.50179	chr2(-):166604101-166651192
TC04000853.hg.1	8.7e-63	6.52e-65	26.5975	137.477	2.49308	chr4(+):174089904-174245118
TC01005824.hg.1	2.42e-64	1.61e-66	27.2767	141.173	2.49253	chr1(-):151955643-151958706
TC02003588.hg.1	3.98e-73	1.19e-75	31.3408	162.146	2.49152	chr2(+):132440113-132457434
TC12000818.hg.1	2.41e-39	8.5e-41	17.4314	82.0061	2.48738	chr12(+):105720744-105789875
TC0Y000084.hg.1	4.28e-40	1.43e-41	17.7019	83.7836	2.48456	chrY(+):26326479-26326514
TC0Y000221.hg.1	4.28e-40	1.43e-41	17.7019	83.7836	2.48456	chrY(-):27635919-27635954
TC15000768.hg.1	4.28e-40	1.43e-41	17.7019	83.7836	2.48456	chr15(+):82734437-82734472
TC15000775.hg.1	4.28e-40	1.43e-41	17.7019	83.7836	2.48456	chr15(+):82817075-82817110
TC15000781.hg.1	4.28e-40	1.43e-41	17.7019	83.7836	2.48456	chr15(+):83110962-83110997
TC15000788.hg.1	4.28e-40	1.43e-41	17.7019	83.7836	2.48456	chr15(+):83201418-83201453
TC15000803.hg.1	4.28e-40	1.43e-41	17.7019	83.7836	2.48456	chr15(+):84838303-84838338
TC15001749.hg.1	4.28e-40	1.43e-41	17.7019	83.7836	2.48456	chr15(-):83005513-83005548
TC15001779.hg.1	4.28e-40	1.43e-41	17.7019	83.7836	2.48456	chr15(-):84979928-84979963
TC15001781.hg.1	4.28e-40	1.43e-41	17.7019	83.7836	2.48456	chr15(-):85047210-85047245
TC07001206.hg.1	5.31e-67	2.77e-69	28.469	147.525	2.47886	chr7(-):24836158-25021253
TC07000126.hg.1	2.92e-40	9.65e-42	17.7622	84.1791	2.47631	chr7(+):20416954-20417024
TC10000826.hg.1	9.51e-26	8.06e-27	12.6608	49.8755	2.47411	chr10(+):115511213-115543188
TC06000668.hg.1	9.31e-65	5.89e-67	27.463	142.176	2.46619	chr6(+):53659295-53788919
TC09001875.hg.1	7.8e-64	5.44e-66	27.0521	139.957	2.46457	chr9(+):33624223-33625532
TC09001276.hg.1	1.18e-49	2.13e-51	21.255	106.395	2.45946	chr9(-):85594500-85678092
TC04000548.hg.1	1.24e-33	6.3e-35	15.407	68.5052	2.45917	chr4(+):106815932-106925184
TC05000612.hg.1	6.25e-40	2.12e-41	17.6425	83.3941	2.45732	chr5(+):127419458-127525380
TC01002578.hg.1	6.43e-44	1.69e-45	19.0953	92.8218	2.45658	chr1(-):43391046-43424847
TC08000298.hg.1	2.14e-65	1.29e-67	27.7458	143.693	2.45385	chr8(+):38854388-38962779
TC06000725.hg.1	6.38e-40	2.16e-41	17.6393	83.3731	2.44735	chr6(+):72294792-72294904
TC09000149.hg.1	2.23e-63	1.62e-65	26.8518	138.867	2.44463	chr9(+):33624223-33625532
TC05002418.hg.1	2.79e-49	5.18e-51	21.1112	105.508	2.42391	chr5(+):68470753-68471373
TC19001925.hg.1	4.47e-32	2.52e-33	14.8618	64.8223	2.42103	chr19(+):302198-304460
TC04002588.hg.1	6.41e-21	7.52e-22	10.9666	38.4731	2.4124	chr4(-):74861359-74862455
TC02002469.hg.1	4.4e-32	2.48e-33	14.8644	64.8394	2.40387	chr2(-):160956177-161128399
TC03000742.hg.1	3.24e-20	4e-21	10.7161	36.8108	2.39404	chr3(+):137717577-137752494
TC14001441.hg.1	6.8e-53	1.02e-54	22.5121	114.033	2.39264	chr14(-):92246095-92333880
TC03000878.hg.1	1.02e-31	5.87e-33	14.7371	63.9778	2.38789	chr3(+):160394947-160396240
TC02001030.hg.1	1.35e-57	1.47e-59	24.4067	125.167	2.38753	chr2(+):173292082-173371181
TC01000580.hg.1	1.3e-39	4.51e-41	17.5275	82.6386	2.38526	chr1(+):46640745-46651634
TC03001979.hg.1	5.56e-47	1.21e-48	20.2359	100.059	2.38429	chr3(-):168801287-169381563
TC12001723.hg.1	8.59e-37	3.53e-38	16.5223	75.9828	2.37936	chr12(-):71518865-71835678
TC03003322.hg.1	3.76e-18	5.4e-19	9.97224	31.9316	2.37779	chr3(+):118892364-118924000
TC08000190.hg.1	1.41e-34	6.69e-36	15.7396	70.7438	2.37176	chr8(+):24151553-24216531
TC11002498.hg.1	3.35e-19	4.47e-20	10.3519	34.41	2.37144	chr11(+):1269191-1270173
TC15001505.hg.1	1.25e-64	8.01e-67	27.4057	141.869	2.37015	chr15(-):60639333-60690242
TC0X000267.hg.1	2.82e-58	2.93e-60	24.6877	126.779	2.36785	chrX(+):49028184-49031588
TC08001431.hg.1	7.12e-23	7.28e-24	11.657	43.0919	2.35626	chr8(-):95139394-95229531
TC17002547.hg.1	4.63e-26	3.85e-27	12.7692	50.6115	2.35176	chr17(-):20419278-20420554
TC12001216.hg.1	8.27e-38	3.2e-39	16.8828	78.38	2.3472	chr12(-):10310899-10324790
TC22000440.hg.1	1.86e-37	7.35e-39	16.7579	77.5507	2.34618	chr22(-):16179618-16181004
TC21000737.hg.1	2.73e-47	5.82e-49	20.3523	100.789	2.33939	chr21(+):42617886-42647465
TC12002778.hg.1	1.67e-31	9.7e-33	14.663	63.4755	2.32945	chr12(-):15035077-15038725
TC02003335.hg.1	1.67e-60	1.49e-62	25.6196	132.056	2.32835	chr2(+):74425690-74442424
TC15002776.hg.1	5.91e-78	9.81e-81	33.7719	173.814	2.32135	chr15(-):72491370-72524163
TC01003873.hg.1	9.76e-39	3.56e-40	17.2142	80.5736	2.31882	chr1(-):223711349-223853436
TC21000736.hg.1	3.78e-48	7.62e-50	20.6777	102.821	2.30584	chr21(+):42602046-42613830
TC05001977.hg.1	2.78e-23	2.77e-24	11.8002	44.0554	2.3034	chr5(-):156456424-156486130
TC07000902.hg.1	4.86e-18	7.04e-19	9.93159	31.6678	2.30235	chr7(+):141811549-141921088
TC04002940.hg.1	1.81e-27	1.37e-28	13.2587	53.9369	2.29918	chr4(-):15969849-16086001
TC08000754.hg.1	8.47e-36	3.72e-37	16.1699	73.6297	2.29892	chr8(+):129021144-129021202
TC06000173.hg.1	4.39e-60	4.02e-62	25.4426	131.062	2.28983	chr6(+):26217148-26217711
TC14001735.hg.1	1.02e-55	1.27e-57	23.6403	120.717	2.28286	chr14(+):65877310-66210839
TC06003087.hg.1	5.32e-40	1.79e-41	17.668	83.5611	2.28101	chr6(+):138661322-138665748
TC18000189.hg.1	4.32e-36	1.86e-37	16.2734	74.3216	2.27907	chr18(+):52495708-52562747
TC06000714.hg.1	1.73e-17	2.62e-18	9.72976	30.3627	2.25877	chr6(+):71104590-71109120
TC01003771.hg.1	6.57e-48	1.35e-49	20.5863	102.252	2.25592	chr1(-):207191866-207206101
TC15000751.hg.1	2.26e-55	2.89e-57	23.4999	119.895	2.25039	chr15(+):80972025-81047962
TC04000544.hg.1	3.31e-45	8.02e-47	19.5724	95.8674	2.24647	chr4(+):106473777-106616835
TC01006300.hg.1	3.89e-58	4.08e-60	24.6301	126.449	2.24613	chr1(-):47715811-47779819
TC14002123.hg.1	2.34e-37	9.3e-39	16.7225	77.3155	2.23505	chr14(-):92221776-92226551
TC06003069.hg.1	3.83e-31	2.28e-32	14.5374	62.6241	2.22882	chr6(+):135511266-135511485
TC17001682.hg.1	2.91e-45	7.01e-47	19.5935	96.0018	2.22161	chr17(-):48260650-48279000
TC01005805.hg.1	4e-56	4.82e-58	23.8056	121.683	2.21452	chr1(-):149397114-149399229
TC21000486.hg.1	4.5e-19	6.04e-20	10.306	34.1093	2.21405	chr21(-):43782391-43786703
TC11000208.hg.1	1.15e-63	8.14e-66	26.9781	139.555	2.214	chr11(+):13690206-13753893
TC06001427.hg.1	1.31e-43	3.49e-45	18.9824	92.0969	2.20846	chr6(-):27839623-27840099
TC03001888.hg.1	1.02e-39	3.52e-41	17.5653	82.8867	2.19712	chr3(-):149086805-149095652
TC17000861.hg.1	3.34e-58	3.48e-60	24.6579	126.609	2.18638	chr17(+):73713474-73753899
TC04001280.hg.1	3.92e-39	1.39e-40	17.3563	81.5117	2.17848	chr4(-):74437267-74486348
TC16001373.hg.1	6.99e-23	7.14e-24	11.6598	43.1108	2.17143	chr16(+):816054-818865
TC15000461.hg.1	1.11e-27	8.28e-29	13.333	54.4416	2.16937	chr15(+):60643425-60643450
TC02000046.hg.1	7.67e-62	6.19e-64	26.1897	135.231	2.15457	chr2(+):9346894-9545812
TC12001792.hg.1	4.15e-44	1.08e-45	19.1649	93.2678	2.15222	chr12(-):88885885-88974628
TC16000207.hg.1	3.18e-46	7.2e-48	19.9528	98.2769	2.14709	chr16(+):18995256-19075262
TC10000350.hg.1	9.59e-19	1.32e-19	10.1872	33.332	2.1428	chr10(+):54074041-54077802
TC06003070.hg.1	1.61e-30	9.99e-32	14.3197	61.1475	2.13477	chr6(+):135518087-135520090
TC04000462.hg.1	7.4e-47	1.62e-48	20.1893	99.7664	2.13181	chr4(+):85504057-85572493
TC06002860.hg.1	2.18e-17	3.34e-18	9.69219	30.1207	2.12808	chr6(+):71104590-71109120
TC15001454.hg.1	2.36e-52	3.64e-54	22.3007	112.762	2.11979	chr15(-):52484515-52587995
TC03002466.hg.1	4.94e-44	1.29e-45	19.1376	93.0927	2.11207	chr3(+):111852270-111854205
TC15000769.hg.1	3.03e-31	1.79e-32	14.5724	62.8617	2.10884	chr15(+):82735848-82735875
TC15000782.hg.1	3.03e-31	1.79e-32	14.5724	62.8617	2.10884	chr15(+):83112373-83112400
TC15000804.hg.1	3.03e-31	1.79e-32	14.5724	62.8617	2.10884	chr15(+):84839714-84839741
TC15001780.hg.1	3.03e-31	1.79e-32	14.5724	62.8617	2.10884	chr15(-):85045801-85045828
TC08002489.hg.1	7.38e-37	3.02e-38	16.5458	76.1394	2.10362	chr8(-):119573406-119576339
TC08000629.hg.1	8.15e-58	8.74e-60	24.4974	125.688	2.09438	chr8(+):102504660-102681954
TC0X001747.hg.1	1.41e-28	9.96e-30	13.6438	56.5549	2.09194	chrX(+):65486697-65487236
TC20001671.hg.1	5.31e-36	2.3e-37	16.2415	74.109	2.08932	chr20(-):56224550-56224992
TC0Y000182.hg.1	9.09e-39	3.32e-40	17.2251	80.6458	2.07905	chrY(-):21152526-21154705
TC02001347.hg.1	1.57e-44	4e-46	19.3205	94.2625	2.07527	chr2(+):223289236-223425667
TC01003197.hg.1	1.01e-42	2.82e-44	18.6582	90.0088	2.07259	chr1(-):149900543-150227304
TC06001777.hg.1	1.75e-57	1.93e-59	24.3597	124.896	2.06889	chr6(-):47199268-47277680
TC11000333.hg.1	1.96e-35	8.8e-37	16.0416	72.7706	2.06839	chr11(+):35218709-35220102
TC01005765.hg.1	9.25e-41	2.96e-42	17.9429	85.3614	2.06729	chr1(-):143906069-143912903
TC04001887.hg.1	2.24e-23	2.21e-24	11.8331	44.2775	2.06266	chr4(+):7755817-7780655
TC20000621.hg.1	2.57e-56	3.06e-58	23.8833	122.136	2.06131	chr20(-):10618332-10654694
TC06000427.hg.1	2.26e-71	8.09e-74	30.4956	157.94	2.06027	chr6(+):33588522-33664351
TC15002759.hg.1	6.23e-39	2.25e-40	17.2838	81.033	2.05887	chr15(+):43985084-43991420
TC01001311.hg.1	7.82e-59	7.79e-61	24.9196	128.103	2.05643	chr1(+):156030951-156040295
TC14001907.hg.1	9.42e-41	3.01e-42	17.9401	85.3429	2.04697	chr14(-):19854098-19925348
TC03001345.hg.1	6.09e-49	1.16e-50	20.981	104.704	2.04376	chr3(-):45123769-45187914
TC15000638.hg.1	1.08e-53	1.55e-55	22.8274	115.917	2.04212	chr15(+):69706585-69740764
TC18000128.hg.1	4.33e-42	1.26e-43	18.4267	88.5103	2.04041	chr18(+):29078027-29128814
TC07000159.hg.1	1.85e-44	4.75e-46	19.2937	94.0915	2.03373	chr7(+):26191847-26226756
TC11000332.hg.1	1.05e-41	3.14e-43	18.2866	87.6014	2.03291	chr11(+):35160417-35253949
TC13001043.hg.1	1.97e-51	3.23e-53	21.9401	110.582	2.02991	chr13(+):42812943-42817030
TC19000709.hg.1	5.68e-41	1.79e-42	18.0196	85.8625	2.02051	chr19(+):49199228-49209207
TC10000659.hg.1	7.03e-47	1.54e-48	20.1979	99.8205	2.01588	chr10(+):94352825-94415152
TC11000249.hg.1	5.36e-65	3.34e-67	27.5684	142.743	2.01376	chr11(+):19138676-19197967
TC01001791.hg.1	2.36e-47	5e-49	20.3766	100.941	2.00807	chr1(+):214776532-214837931
TC03002008.hg.1	7.07e-41	2.24e-42	17.9851	85.6369	2.00304	chr3(-):172348039-172429008
TC19000522.hg.1	1.11e-57	1.2e-59	24.442	125.37	1.99893	chr19(+):38755098-38783254
TC15002760.hg.1	5.78e-56	7.01e-58	23.7414	121.309	1.99858	chr15(+):30916697-30931023
TC11000741.hg.1	3.09e-31	1.83e-32	14.5695	62.8415	1.98957	chr11(+):71422786-71433273
TC12002850.hg.1	2.69e-45	6.47e-47	19.6063	96.0827	1.98615	chr12(-):46581574-46581823
TC14000397.hg.1	5.2e-51	8.75e-53	21.7762	109.585	1.98479	chr14(+):65877310-66210839
TC6_mann_hap4000109.hg.1	1.66e-28	1.17e-29	13.6198	56.3917	1.98336	chr6_mann_hap4
TC6_ssto_hap7000112.hg.1	1.41e-28	9.92e-30	13.6444	56.5588	1.98036	chr6_ssto_hap7
TC14000133.hg.1	2.92e-56	3.49e-58	23.8609	122.006	1.97904	chr14(+):23305766-23318236
TC6_qbl_hap6000121.hg.1	1.8e-28	1.28e-29	13.6074	56.3071	1.97803	chr6_qbl_hap6
TC6_mcf_hap5000111.hg.1	1.04e-28	7.27e-30	13.69	56.8692	1.97689	chr6_mcf_hap5
TC03003213.hg.1	1.3e-33	6.58e-35	15.4006	68.4617	1.97226	chr3(-):172413336-172413925
TC15001690.hg.1	1.01e-56	1.18e-58	24.047	123.088	1.97154	chr15(-):77334178-77376326
TC09000335.hg.1	1.25e-31	7.24e-33	14.7061	63.7678	1.96834	chr9(+):75766673-75785309
TC22001186.hg.1	3.19e-42	9.22e-44	18.4754	88.8264	1.96826	chr22(-):16101370-16193226
TC12002874.hg.1	4.88e-45	1.2e-46	19.5095	95.4672	1.96712	chr12(-):50569572-50570160
TC02001105.hg.1	1.26e-34	5.96e-36	15.7568	70.8594	1.96541	chr2(+):189839046-189877472
TC01000939.hg.1	2.58e-18	3.67e-19	10.0315	32.3167	1.96354	chr1(+):109656585-109749403
TC0X001121.hg.1	2.38e-29	1.6e-30	13.9125	58.3812	1.96049	chrX(-):70327254-70331958
TC6_dbb_hap3000120.hg.1	1.44e-28	1.01e-29	13.6411	56.5363	1.95565	chr6_dbb_hap3
TC06002330.hg.1	1.57e-33	8.01e-35	15.3714	68.2651	1.95556	chr6(-):169615875-169654139
TC14001573.hg.1	1.01e-39	3.48e-41	17.5672	82.8992	1.95442	chr14(+):19650018-19718563
TC04001092.hg.1	3.55e-52	5.55e-54	22.2307	112.34	1.95392	chr4(-):25749049-25865382
TC12001426.hg.1	1.29e-45	3.03e-47	19.7258	96.8413	1.95054	chr12(-):46576841-46663208
TC06000153.hg.1	5.43e-57	6.22e-59	24.1575	123.728	1.94777	chr6(+):25279306-25620758
TC07000718.hg.1	1.46e-60	1.29e-62	25.6443	132.195	1.94774	chr7(+):115850547-115898837
TC04000590.hg.1	2.35e-27	1.8e-28	13.2189	53.6665	1.94713	chr4(+):115519611-115599380
TC02003744.hg.1	2.17e-36	9.16e-38	16.3794	75.0302	1.94703	chr2(+):189871655-189873712
TC15001858.hg.1	1.37e-51	2.21e-53	22.0025	110.96	1.94503	chr15(-):91509268-91538859
TC01006023.hg.1	1.98e-40	6.45e-42	17.8237	84.5818	1.93144	chr1(-):197113086-197115665
TC11003312.hg.1	8.84e-20	1.13e-20	10.5599	35.7789	1.92821	chr11(-):102668128-102668877
TC04002792.hg.1	1.68e-56	1.98e-58	23.958	122.571	1.92243	chr4(-):154228621-154229963
TC08001784.hg.1	1.62e-32	8.88e-34	15.0156	65.8629	1.91711	chr8(+):7996388-7997523
TC20000076.hg.1	7.71e-32	4.4e-33	14.7794	64.2644	1.9158	chr20(+):9049410-9461889
TC15000864.hg.1	3.07e-64	2.06e-66	27.231	140.926	1.91425	chr15(+):90931450-91045475
TC03001948.hg.1	6.97e-41	2.21e-42	17.9874	85.6518	1.91403	chr3(-):158363611-158390482
TC03002079.hg.1	9.22e-48	1.91e-49	20.5306	101.905	1.90943	chr3(-):185361527-185542844
TC12000611.hg.1	2.97e-27	2.29e-28	13.1836	53.4263	1.90842	chr12(+):69742121-69748014
TC20000341.hg.1	6.9e-20	8.73e-21	10.5985	36.0337	1.90697	chr20(+):43803517-43805185
TC06001879.hg.1	5.08e-37	2.06e-38	16.6027	76.5187	1.90488	chr6(-):75794042-75915767
TC01001174.hg.1	9.7e-56	1.2e-57	23.6502	120.775	1.90189	chr1(+):149822628-149823191
TC13000151.hg.1	1.54e-54	2.11e-56	23.1627	117.907	1.89984	chr13(+):42813346-42817026
TC15000223.hg.1	5.95e-51	1e-52	21.7536	109.448	1.89883	chr15(+):32907345-32932150
TC6_cox_hap2000131.hg.1	2.65e-28	1.9e-29	13.5489	55.9093	1.89431	chr6_cox_hap2
TC02000454.hg.1	1.84e-55	2.33e-57	23.5366	120.109	1.88684	chr2(+):74425689-74444692
TC17000819.hg.1	7.57e-55	1.02e-56	23.2854	118.632	1.88588	chr17(+):70117161-70122561
TC04001516.hg.1	1.56e-44	3.98e-46	19.3212	94.2672	1.88548	chr4(-):122737599-122745088
TC04002771.hg.1	9.77e-56	1.2e-57	23.6489	120.768	1.88197	chr4(-):146680160-146681273
TC06001495.hg.1	7.61e-28	5.62e-29	13.39	54.829	1.8794	chr6(-):30070674-30080883
TC03000756.hg.1	1.81e-62	1.38e-64	26.4607	136.726	1.87864	chr3(+):140660662-140698785
TC06002265.hg.1	9.07e-55	1.24e-56	23.2531	118.442	1.87821	chr6(-):159186773-159240456
TC15001305.hg.1	4.4e-18	6.36e-19	9.94733	31.7698	1.87522	chr15(-):45384848-45406542
TC12000564.hg.1	7.06e-49	1.36e-50	20.9557	104.547	1.87469	chr12(+):64238073-64541613
TC02002480.hg.1	9.76e-41	3.13e-42	17.9344	85.3055	1.87371	chr2(-):163027194-163101661
TC10000673.hg.1	2.49e-47	5.28e-49	20.3678	100.886	1.87096	chr10(+):96305543-96373662
TC14000857.hg.1	1.09e-36	4.49e-38	16.4862	75.7426	1.86404	chr14(-):19854098-19925348
TC03001980.hg.1	2.08e-33	1.07e-34	15.3289	67.9787	1.86375	chr3(-):169331298-169341739
TC04001655.hg.1	6.31e-55	8.46e-57	23.3175	118.821	1.86295	chr4(-):154228621-154229963
TC01005259.hg.1	4.51e-49	8.52e-51	21.0306	105.011	1.85839	chr1(-):9794131-9796076
TC09000498.hg.1	1.27e-42	3.6e-44	18.6206	89.766	1.85721	chr9(+):101569980-101612363
TC19000575.hg.1	1.32e-26	1.06e-27	12.9582	51.8945	1.85379	chr19(+):41699115-41713444
TC10001497.hg.1	4.78e-32	2.7e-33	14.8517	64.7538	1.85285	chr10(-):90579659-90611732
TC14001439.hg.1	2.67e-21	3.05e-22	11.1018	39.3733	1.85126	chr14(-):92047118-92198430
TC01003662.hg.1	5.18e-39	1.85e-40	17.3132	81.2274	1.84947	chr1(-):197053257-197115824
TC04002024.hg.1	4.68e-59	4.57e-61	25.0134	128.636	1.84891	chr4(+):56264559-56265055
TC02001556.hg.1	3.13e-36	1.33e-37	16.3233	74.6553	1.84745	chr2(-):8992820-9143942
TC12003109.hg.1	2.11e-32	1.16e-33	14.9759	65.5939	1.8411	chr12(-):117476728-117537251
TC06003952.hg.1	3.58e-38	1.36e-39	17.0124	79.239	1.83901	chr6(-):159219682-159221893
TC06004137.hg.1	1.11e-58	1.12e-60	24.856	127.74	1.83311	chr6(-):129897277-130031370
TC05002946.hg.1	2.28e-29	1.53e-30	13.919	58.4257	1.83289	chr5(-):33523641-33525271
TC01002954.hg.1	7.35e-41	2.34e-42	17.9789	85.5968	1.82761	chr1(-):109852188-109940573
TC02001119.hg.1	4.37e-73	1.32e-75	31.3209	162.048	1.82581	chr2(+):191273081-191373931
TC08002233.hg.1	5.68e-34	2.8e-35	15.5273	69.3156	1.82122	chr8(-):12427802-12428644
TC21000998.hg.1	1.1e-29	7.24e-31	14.0287	59.1707	1.81804	chr21(-):43791996-43809253
TC06002266.hg.1	3.92e-38	1.49e-39	16.9983	79.1457	1.81299	chr6(-):159219682-159221893
TC08001062.hg.1	4.02e-35	1.84e-36	15.9317	72.0339	1.81281	chr8(-):23699428-23712320
TC17002470.hg.1	5.37e-58	5.69e-60	24.5721	126.117	1.80834	chr17(-):7771139-7777031
TC01002942.hg.1	2.49e-66	1.39e-68	28.1638	145.915	1.80695	chr1(-):108677442-108742974
TC05001558.hg.1	1.79e-42	5.09e-44	18.567	89.4194	1.80496	chr5(-):83236373-83680611
TC02001100.hg.1	3.04e-48	6.07e-50	20.7143	103.049	1.80488	chr2(+):187454790-187545628
TC11002081.hg.1	9.32e-46	2.17e-47	19.7787	97.1763	1.80306	chr11(-):74041361-74109518
TC02000500.hg.1	7.55e-57	8.72e-59	24.0993	123.391	1.80263	chr2(+):85132749-85133799
TC19000981.hg.1	6.47e-51	1.1e-52	21.7394	109.361	1.80093	chr19(-):281044-291435
TC12001276.hg.1	1.42e-28	9.98e-30	13.6434	56.5525	1.79712	chr12(-):15034115-15038860
TC20000168.hg.1	4.06e-48	8.2e-50	20.666	102.749	1.7908	chr20(+):25228705-25278650
TC10000453.hg.1	1.09e-43	2.9e-45	19.0114	92.2835	1.78646	chr10(+):74461207-74463097
TC04002080.hg.1	1.45e-44	3.69e-46	19.333	94.3427	1.78312	chr4(+):78079687-78087074
TC15000846.hg.1	6.41e-48	1.31e-49	20.5903	102.277	1.78233	chr15(+):89787180-89860492
TC06000171.hg.1	6.97e-49	1.33e-50	20.9581	104.562	1.78128	chr6(+):26199748-26200942
TC11002237.hg.1	3.27e-20	4.04e-21	10.7144	36.7993	1.78058	chr11(-):102733464-102745764
TC02001035.hg.1	8.11e-32	4.64e-33	14.7718	64.213	1.77878	chr2(+):174219548-174233725
TC03000569.hg.1	5.08e-51	8.54e-53	21.7803	109.61	1.77847	chr3(+):111805182-111849851
TC06001142.hg.1	1.34e-38	4.91e-40	17.1656	80.2527	1.76886	chr6(+):159590429-159693141
TC11001458.hg.1	2.14e-42	6.12e-44	18.5387	89.2362	1.76618	chr11(-):17515442-17565963
TC17001371.hg.1	7.38e-39	2.67e-40	17.2576	80.8606	1.7653	chr17(-):33762115-33775856
TC17000764.hg.1	1.02e-42	2.86e-44	18.6564	89.9974	1.76418	chr17(+):61086898-61505067
TC12001492.hg.1	6.66e-49	1.27e-50	20.9662	104.612	1.757	chr12(-):50569563-50677353
TC01006091.hg.1	7.04e-40	2.39e-41	17.6239	83.2718	1.75612	chr1(-):211844574-211847705
TC05003313.hg.1	3.33e-44	8.62e-46	19.2004	93.495	1.75474	chr5(-):151046006-151047170
TC07002236.hg.1	2.88e-20	3.55e-21	10.7339	36.9288	1.74821	chr7(+):30962194-30963687
TC14002183.hg.1	2.15e-26	1.75e-27	12.8848	51.3963	1.74767	chr14(-):105419893-105436820
TC19002569.hg.1	4.47e-48	9.06e-50	20.65	102.649	1.74308	chr19(-):53407534-53418575
TC17_ctg5_hap1000029.hg.1	7.94e-50	1.43e-51	21.3199	106.794	1.74237	chr17_ctg5_hap1(-):1151952-1170453
TC01000936.hg.1	1.31e-44	3.32e-46	19.3498	94.4498	1.73923	chr1(+):109417972-109476957
TC01003193.hg.1	2.96e-48	5.9e-50	20.7188	103.077	1.73791	chr1(-):149856009-149858232
TC11001998.hg.1	3.67e-33	1.92e-34	15.2422	67.3933	1.73605	chr11(-):67702034-67707245
TC19000458.hg.1	3.95e-45	9.62e-47	19.5439	95.6866	1.73492	chr19(+):35606732-35615228
TC19001505.hg.1	3.68e-22	3.95e-23	11.4059	41.4062	1.73238	chr19(-):39292311-39303740
TC22000438.hg.1	2.71e-38	1.02e-39	17.0555	79.5242	1.73156	chr22(-):16147979-16193004
TC02004035.hg.1	9.28e-30	6.06e-31	14.0549	59.349	1.73152	chr2(-):8992820-8994376
TC02002905.hg.1	2.9e-34	1.4e-35	15.6295	70.0039	1.73147	chr2(-):238232646-238323018
TC01003533.hg.1	4.36e-42	1.28e-43	18.4253	88.5017	1.73063	chr1(-):173834760-173834824
TC18000103.hg.1	4.2e-40	1.4e-41	17.7053	83.8057	1.72996	chr18(+):21269562-21535030
TC08002451.hg.1	6.63e-61	5.7e-63	25.7906	133.013	1.72323	chr8(-):101960862-101961070
TC07000565.hg.1	2.3e-42	6.6e-44	18.5269	89.1599	1.72319	chr7(+):94536514-94925727
TC05000232.hg.1	1.85e-41	5.66e-43	18.1961	87.0127	1.72243	chr5(+):54455946-54463129
TC06002862.hg.1	2.38e-35	1.07e-36	16.0119	72.5716	1.72062	chr6(+):71221818-71225656
TC10000164.hg.1	4.74e-61	4.03e-63	25.8528	133.36	1.71649	chr10(+):23425852-23426154
TC02004412.hg.1	6.6e-45	1.63e-46	19.4608	95.1571	1.71515	chr2(-):96602559-96604956
TC06003311.hg.1	1.82e-22	1.91e-23	11.5137	42.1292	1.71307	chr6(-):2037712-2038201
TC15000296.hg.1	2.64e-62	2.04e-64	26.3903	136.339	1.7115	chr15(+):41136241-41150405
TC17002860.hg.1	3.67e-47	7.91e-49	20.3034	100.483	1.70734	chr17(+):66031848-66042970
TC09002707.hg.1	3.2e-38	1.21e-39	17.0301	79.3561	1.70671	chr9(-):104235457-104237132
TC16001165.hg.1	1.13e-44	2.83e-46	19.3743	94.6063	1.70437	chr16(-):64977656-65156101
TC21000185.hg.1	4.98e-41	1.56e-42	18.0402	85.997	1.70342	chr21(+):42539728-42648524
TC02000663.hg.1	6.59e-20	8.32e-21	10.6058	36.0817	1.70043	chr2(+):108905095-108926371
TC02002204.hg.1	1.38e-44	3.49e-46	19.3418	94.3984	1.69932	chr2(-):111395275-111435691
TC01003172.hg.1	3.33e-52	5.19e-54	22.242	112.408	1.69444	chr1(-):149397114-149400542
TC11003382.hg.1	4.86e-40	1.63e-41	17.6821	83.654	1.6924	chr11(-):119290971-119293850
TC09002894.hg.1	1.58e-37	6.25e-39	16.7823	77.7128	1.69182	chr9(-):88641058-88715116
TC06000135.hg.1	5.32e-48	1.08e-49	20.6215	102.471	1.69129	chr6(+):21593000-21598850
TC01005350.hg.1	1.38e-37	5.4e-39	16.8043	77.859	1.69013	chr1(-):26227511-26230318
TC17001840.hg.1	2.68e-43	7.24e-45	18.8691	91.3686	1.68733	chr17(-):70380443-70588943
TC11003302.hg.1	2.25e-62	1.72e-64	26.4209	136.507	1.68628	chr11(-):95566044-95657371
TC20001421.hg.1	1.3e-46	2.89e-48	20.0976	99.1899	1.68514	chr20(-):10654277-10654624
TC18000226.hg.1	6.02e-24	5.74e-25	12.0327	45.6234	1.68468	chr18(+):61143994-61172318
TC01003784.hg.1	2.02e-41	6.19e-43	18.1825	86.9241	1.68346	chr1(-):209788218-209825820
TC08001692.hg.1	2.81e-57	3.16e-59	24.2745	124.405	1.6812	chr8(-):142262385-142263391
TC02003743.hg.1	1.05e-32	5.68e-34	15.0815	66.3082	1.67929	chr2(+):189868165-189870189
TC01005732.hg.1	2.98e-47	6.37e-49	20.3379	100.699	1.67893	chr1(-):117057156-117113715
TC11001059.hg.1	5.17e-33	2.73e-34	15.19	67.0413	1.67889	chr11(+):117947727-117996323
TC01003191.hg.1	7.73e-64	5.38e-66	27.0541	139.968	1.67475	chr1(-):149821759-149822340
TC07001581.hg.1	5.54e-50	9.86e-52	21.3803	107.165	1.67428	chr7(-):87834432-87856308
TC17000654.hg.1	1.26e-43	3.37e-45	18.9877	92.1312	1.67414	chr17(+):48133332-48167849
TC11003279.hg.1	4.43e-32	2.49e-33	14.8633	64.8323	1.67302	chr11(-):85416009-85420543
TC01002338.hg.1	2.75e-21	3.14e-22	11.097	39.3416	1.67103	chr1(-):23518388-23521222
TC02000466.hg.1	6.64e-36	2.9e-37	16.2074	73.8806	1.66874	chr2(+):75059782-75120486
TC07001194.hg.1	3.39e-22	3.64e-23	11.4182	41.4886	1.66609	chr7(-):23349828-23510086
TC03000087.hg.1	8.72e-67	4.66e-69	28.3702	147.005	1.66572	chr3(+):14444076-14530857
TC13001534.hg.1	3.46e-41	1.08e-42	18.0977	86.3714	1.66568	chr13(-):60544078-60738041
TC05001314.hg.1	8.24e-30	5.36e-31	14.0728	59.4703	1.66491	chr5(-):43041718-43041745
TC10000452.hg.1	4.55e-51	7.58e-53	21.7998	109.729	1.66397	chr10(+):74451889-74647452
TC02002194.hg.1	1.25e-29	8.26e-31	14.0094	59.04	1.66357	chr2(-):110841447-110874143
TC19002097.hg.1	2.23e-41	6.84e-43	18.167	86.8232	1.66332	chr19(+):35645672-35660788
TC09002074.hg.1	7.75e-27	6.14e-28	13.0389	52.4428	1.65975	chr9(+):91926209-91931337
TC11003286.hg.1	3.25e-41	1.01e-42	18.1078	86.4377	1.65743	chr11(-):89057522-89224653
TC15002758.hg.1	1.84e-35	8.26e-37	16.051	72.8335	1.65698	chr15(+):43885252-43897099
TC10002226.hg.1	7.55e-50	1.36e-51	21.3286	106.847	1.65644	chr10(+):96305573-96314022
TC6_dbb_hap3000236.hg.1	1.91e-66	1.05e-68	28.2159	146.191	1.65602	chr6_dbb_hap3
TC04002654.hg.1	1.52e-40	4.93e-42	17.8649	84.8511	1.65087	chr4(-):104059527-104061564
TC12000565.hg.1	5.07e-37	2.06e-38	16.6033	76.5225	1.65027	chr12(+):64272567-64273254
TC12002414.hg.1	5.24e-39	1.87e-40	17.3114	81.2153	1.64829	chr12(+):64540892-64541613
TC12001253.hg.1	5.7e-35	2.64e-36	15.8781	71.6745	1.64775	chr12(-):12482198-12503475
TC02000628.hg.1	3.45e-20	4.27e-21	10.706	36.7441	1.64245	chr2(+):103236148-103327809
TC12001361.hg.1	2.02e-50	3.53e-52	21.548	108.192	1.64219	chr12(-):31433518-31479306
TC17000718.hg.1	2.56e-40	8.41e-42	17.7832	84.3165	1.63951	chr17(+):57232860-57284070
TC02001122.hg.1	3.76e-43	1.03e-44	18.8144	91.0168	1.63669	chr2(+):191745547-191830278
TC11002850.hg.1	2.3e-23	2.28e-24	11.8292	44.2506	1.63653	chr11(+):102980160-103024200
TC0X001376.hg.1	3.14e-39	1.11e-40	17.3907	81.7377	1.63622	chrX(-):132434131-132549518
TC14001155.hg.1	6.87e-44	1.81e-45	19.0847	92.7541	1.63484	chr14(-):55614830-55658396
TC01003085.hg.1	5.01e-35	2.31e-36	15.8978	71.8063	1.63389	chr1(-):143896452-143913143
TC08000750.hg.1	1.21e-37	4.74e-39	16.8237	77.9876	1.63328	chr8(+):128806779-129113499
TC6_cox_hap2000255.hg.1	4.7e-65	2.91e-67	27.594	142.88	1.63032	chr6_cox_hap2
TC06003301.hg.1	5.31e-27	4.16e-28	13.0959	52.8305	1.62545	chr6(-):1932480-1934415
TC02000703.hg.1	5.49e-55	7.32e-57	23.342	118.966	1.62542	chr2(+):112812800-112876895
TC19002494.hg.1	8.11e-23	8.33e-24	11.6371	42.9582	1.62492	chr19(-):43130188-43130796
TC12002307.hg.1	9.56e-31	5.84e-32	14.3987	61.6834	1.62478	chr12(+):32557113-32644081
TC01003192.hg.1	2.98e-34	1.45e-35	15.6253	69.9752	1.62209	chr1(-):149825607-149832725
TC17002877.hg.1	8.44e-49	1.62e-50	20.9264	104.366	1.62172	chr17(+):43697710-43715329
TC10001334.hg.1	6.74e-28	4.96e-29	13.4081	54.9527	1.62091	chr10(-):66585344-66585369
TC07001240.hg.1	1.93e-37	7.64e-39	16.752	77.5115	1.62071	chr7(-):29553840-29603286
TC17000495.hg.1	1.06e-42	2.97e-44	18.6502	89.957	1.61656	chr17(+):38443885-38459413
TC13001100.hg.1	1.06e-43	2.82e-45	19.0155	92.3095	1.61344	chr13(+):53029617-53035443
TC12001324.hg.1	5.43e-39	1.94e-40	17.3059	81.1787	1.61021	chr12(-):26272078-26278060
TC02000403.hg.1	2.28e-34	1.09e-35	15.6668	70.2547	1.61004	chr2(+):69240276-69476459
TC07001164.hg.1	2.89e-22	3.08e-23	11.443	41.6547	1.60946	chr7(-):16899029-16921613
TC11001997.hg.1	1.53e-30	9.48e-32	14.3275	61.2	1.60872	chr11(-):67612673-67616144
TC02000874.hg.1	3.04e-51	5.03e-53	21.8671	110.138	1.60855	chr2(+):134877554-135212192
TC04000321.hg.1	6.38e-57	7.33e-59	24.1291	123.564	1.60509	chr4(+):56278803-56278905
TC04001436.hg.1	9.06e-40	3.1e-41	17.5845	83.0127	1.60499	chr4(-):104026963-104119566
TC03000766.hg.1	3.02e-40	1e-41	17.7567	84.1427	1.60435	chr3(+):141594966-141645382
TC20000198.hg.1	7.36e-34	3.66e-35	15.4875	69.0476	1.60376	chr20(+):30326904-30389608
TC02003950.hg.1	1.9e-31	1.11e-32	14.6432	63.3413	1.60156	chr2(-):239563-242178
TC03002349.hg.1	4.01e-50	7.07e-52	21.4346	107.498	1.59882	chr3(+):53213605-53217212
TC06000669.hg.1	2.1e-53	3.05e-55	22.7137	115.239	1.59881	chr6(+):53783772-53785586
TC14000026.hg.1	9.61e-37	3.96e-38	16.5048	75.8667	1.59473	chr14(+):19650018-19759003
TC11003311.hg.1	4.61e-17	7.25e-18	9.57245	29.3515	1.59384	chr11(-):102667775-102668070
TC03000545.hg.1	1.16e-19	1.49e-20	10.5178	35.5014	1.5928	chr3(+):108015376-108097132
TC01000353.hg.1	1.02e-42	2.87e-44	18.6557	89.9928	1.59258	chr1(+):27189629-27190948
TC10000664.hg.1	3.26e-41	1.01e-42	18.1074	86.4346	1.58996	chr10(+):95256369-95288849
TC02002468.hg.1	1.85e-33	9.46e-35	15.3467	68.0988	1.58979	chr2(-):160788519-160919126
TC0X000987.hg.1	1.77e-35	7.92e-37	16.0573	72.8756	1.58222	chrX(-):45707327-45710920
TC10001110.hg.1	1.4e-44	3.54e-46	19.3395	94.3841	1.57889	chr10(-):25137554-25241535
TC15000306.hg.1	9.41e-40	3.23e-41	17.5784	82.9727	1.57401	chr15(+):41624892-41673248
TC01005808.hg.1	6.84e-46	1.58e-47	19.8286	97.4921	1.57369	chr1(-):149816065-149820591
TC04002026.hg.1	1.73e-44	4.44e-46	19.3041	94.1578	1.56601	chr4(+):56828901-56829220
TC01001173.hg.1	4.31e-33	2.26e-34	15.2177	67.2281	1.56594	chr1(+):149804221-149811339
TC06000176.hg.1	1.74e-50	3.03e-52	21.5729	108.345	1.56549	chr6(+):26251879-26252303
TC13000523.hg.1	4.31e-47	9.32e-49	20.2774	100.32	1.56282	chr13(-):30083547-30169825
TC10000797.hg.1	1.08e-40	3.45e-42	17.9191	85.2057	1.56161	chr10(+):111756108-111895323
TC12002392.hg.1	1.11e-45	2.6e-47	19.75	96.9945	1.56142	chr12(+):56984916-56985713
TC0X000807.hg.1	6.57e-27	5.18e-28	13.0638	52.6121	1.56131	chrX(-):3226606-3264684
TC15000190.hg.1	4.32e-48	8.73e-50	20.6558	102.685	1.56078	chr15(+):30935128-30935255
TC12002956.hg.1	1.02e-22	1.06e-23	11.6014	42.7181	1.55963	chr12(-):71031862-71314586
TC01005690.hg.1	1.22e-24	1.11e-25	12.2752	47.2629	1.55602	chr1(-):110276554-110283660
TC08002271.hg.1	4.03e-28	2.92e-29	13.4861	55.4827	1.55464	chr8(-):29190580-29192682
TC01001838.hg.1	1.9e-50	3.32e-52	21.5579	108.253	1.55063	chr1(+):223889295-223963720
TC15001335.hg.1	2.2e-30	1.38e-31	14.2726	60.8275	1.549	chr15(-):48700503-48938046
TC06000715.hg.1	1.33e-37	5.2e-39	16.8097	77.8949	1.54596	chr6(+):71122644-71270877
TC12000974.hg.1	1.59e-46	3.56e-48	20.0645	98.9817	1.54551	chr12(+):123011795-123110947
TC07002162.hg.1	1.02e-45	2.39e-47	19.7629	97.0763	1.54543	chr7(+):16685759-16746148
TC02000937.hg.1	1.15e-25	9.77e-27	12.6325	49.6838	1.54399	chr2(+):152214106-152236562
TC03001632.hg.1	1.48e-37	5.8e-39	16.7933	77.7861	1.54074	chr3(-):108268718-108308491
PSR02024017.hg.1	1.74e-17	2.64e-18	9.72861	30.3553	1.53562	19096700
TC6_mann_hap4000206.hg.1	1.03e-64	6.56e-67	27.4428	142.068	1.53547	chr6_mann_hap4
TC6_qbl_hap6000233.hg.1	1.03e-64	6.56e-67	27.4428	142.068	1.53547	chr6_qbl_hap6
TC04001824.hg.1	1.18e-28	8.27e-30	13.671	56.7401	1.53519	chr4(-):187508937-187647876
TC20001170.hg.1	1.5e-43	4.03e-45	18.96	91.9535	1.53197	chr20(+):25277959-25278247
TC12002858.hg.1	2.15e-38	8.02e-40	17.0915	79.763	1.53147	chr12(-):48258836-48272827
TC20000960.hg.1	2.54e-25	2.22e-26	12.5121	48.8672	1.52837	chr20(-):52553316-52687304
TC08000576.hg.1	1.5e-39	5.23e-41	17.5051	82.4908	1.5276	chr8(+):95700119-95701479
TC17001353.hg.1	1.98e-41	6.05e-43	18.186	86.9471	1.52692	chr17(-):30819627-31203902
TC12001227.hg.1	1.82e-40	5.92e-42	17.8368	84.6675	1.52681	chr12(-):10851676-10875953
TC02002263.hg.1	1.37e-28	9.65e-30	13.6485	56.5867	1.52651	chr2(-):121974163-122042783
TC03000911.hg.1	8.53e-31	5.19e-32	14.416	61.8007	1.52415	chr3(+):169775089-169775217
TC20000387.hg.1	6.34e-40	2.15e-41	17.6405	83.3805	1.52343	chr20(+):47895477-47895565
TC06004119.hg.1	1.23e-64	7.86e-67	27.4093	141.888	1.52241	chr6(-):31698358-31707540
TC6_mcf_hap5000221.hg.1	1.23e-64	7.86e-67	27.4093	141.888	1.52241	chr6_mcf_hap5
TC6_ssto_hap7000209.hg.1	1.23e-64	7.86e-67	27.4093	141.888	1.52241	chr6_ssto_hap7
TC05002544.hg.1	5.96e-39	2.15e-40	17.2908	81.0793	1.52147	chr5(+):102201527-102366808
TC17001083.hg.1	2.46e-34	1.18e-35	15.6552	70.1766	1.5206	chr17(-):7162666-7166519
TC18000009.hg.1	1.87e-39	6.55e-41	17.4709	82.2661	1.51982	chr18(+):2571510-2616634
TC07000172.hg.1	1.04e-17	1.55e-18	9.81004	30.8808	1.51963	chr7(+):27401462-27449557
TC16000558.hg.1	3.12e-27	2.41e-28	13.1762	53.3761	1.5191	chr16(+):68678151-68732971
TC03000914.hg.1	1.51e-50	2.62e-52	21.5967	108.491	1.51854	chr3(+):169940153-170023770
TC11000921.hg.1	1.84e-36	7.7e-38	16.4053	75.203	1.51527	chr11(+):94277006-94354587
TC01000727.hg.1	5.03e-37	2.04e-38	16.6044	76.5299	1.51409	chr1(+):65210778-65298915
TC19001593.hg.1	3.36e-40	1.12e-41	17.7398	84.0324	1.51264	chr19(-):44150247-44174502
TC19001808.hg.1	7.04e-54	9.97e-56	22.9013	116.357	1.51226	chr19(-):53418450-53421126
TC07002219.hg.1	4.22e-17	6.6e-18	9.58685	29.4439	1.51135	chr7(+):27451783-27452510
TC07002535.hg.1	1.27e-43	3.41e-45	18.9863	92.122	1.50971	chr7(+):115893170-115895118
TC07002879.hg.1	2.45e-41	7.53e-43	18.1523	86.7273	1.50962	chr7(-):33053742-33102409
TC19000316.hg.1	1.03e-58	1.04e-60	24.8687	127.813	1.50836	chr19(+):16178317-16213813
TC06001029.hg.1	1.39e-37	5.46e-39	16.8026	77.8478	1.50835	chr6(+):138483053-138665800
TC02002467.hg.1	1.16e-26	9.24e-28	12.9789	52.0351	1.50786	chr2(-):160625139-160761267
TC08002503.hg.1	2.68e-34	1.29e-35	15.6417	70.0859	1.50685	chr8(-):124510130-124515058
TC06003312.hg.1	1.88e-20	2.28e-21	10.8003	37.3684	1.50573	chr6(-):2150891-2152826
TC01001767.hg.1	1.39e-36	5.78e-38	16.4483	75.4895	1.50436	chr1(+):212208919-212280742
TC15000949.hg.1	5.5e-42	1.62e-43	18.3889	88.2653	1.50333	chr15(+):99192200-99507759
TC07001243.hg.1	1.08e-43	2.87e-45	19.0131	92.2946	1.50237	chr7(-):29959719-30029905
TC04002953.hg.1	3.1e-19	4.12e-20	10.3639	34.4892	1.50092	chr4(+):75480629-75490486
TC02003949.hg.1	1.59e-45	3.77e-47	19.6914	96.6232	1.50011	chr2(-):218149-264392
TC14000386.hg.1	1.01e-33	5.09e-35	15.4386	68.7183	1.4977	chr14(+):64319683-64693167
TC15001183.hg.1	1.52e-51	2.46e-53	21.985	110.854	1.49722	chr15(-):33057747-33486897
TC06001971.hg.1	1.39e-48	2.72e-50	20.8434	103.851	1.49656	chr6(-):101878709-101878736
TC08000597.hg.1	5.65e-39	2.03e-40	17.2995	81.1365	1.49452	chr8(+):98787285-98865241
TC09001488.hg.1	1.04e-55	1.29e-57	23.6367	120.696	1.49358	chr9(-):114758832-115112545
TC12003015.hg.1	5.21e-27	4.08e-28	13.099	52.8513	1.49269	chr12(-):95470527-95472226
TC04002952.hg.1	2.89e-19	3.83e-20	10.375	34.5619	1.49191	chr4(+):75310851-75320727
TC17001872.hg.1	2.21e-56	2.62e-58	23.9099	122.291	1.4915	chr17(-):73131343-73150778
TC16000258.hg.1	2.35e-45	5.63e-47	19.6281	96.2215	1.49146	chr16(+):23690143-23701688
TC02003490.hg.1	1.82e-37	7.19e-39	16.761	77.5716	1.49018	chr2(+):110744640-110753809
TC19002544.hg.1	6.17e-40	2.09e-41	17.6448	83.4093	1.49014	chr19(-):50138550-50139936
TC18000221.hg.1	3.57e-24	3.36e-25	12.1116	46.1566	1.49002	chr18(+):59992520-60054899
TC11000963.hg.1	2.26e-21	2.56e-22	11.1276	39.5452	1.48634	chr11(+):102980160-103350591
TC15002245.hg.1	4.87e-46	1.11e-47	19.884	97.8424	1.48497	chr15(+):66797431-66841822
TC10002273.hg.1	6.31e-60	5.83e-62	25.377	130.693	1.48482	chr10(+):107446143-107447532
TC03000051.hg.1	3.44e-48	6.9e-50	20.6937	102.921	1.48416	chr3(+):10068098-10143614
TC01001213.hg.1	9.4e-37	3.87e-38	16.5084	75.8905	1.47983	chr1(+):151518272-151518367
TC19001171.hg.1	4.28e-47	9.23e-49	20.2789	100.329	1.47856	chr19(-):10683347-10697992
TC02003597.hg.1	9.36e-39	3.41e-40	17.2207	80.6168	1.47716	chr2(+):135206960-135212192
TC15001541.hg.1	5.02e-25	4.47e-26	12.4088	48.1676	1.47405	chr15(-):63613577-63674360
TC05001392.hg.1	2.27e-20	2.77e-21	10.7714	37.1766	1.47252	chr5(-):59892739-59996017
TC04000320.hg.1	1.47e-64	9.53e-67	27.3736	141.696	1.47157	chr4(+):56262090-56292342
TC15000850.hg.1	4.45e-35	2.04e-36	15.9161	71.9291	1.47012	chr15(+):90118713-90171253
TC14001562.hg.1	2.9e-23	2.89e-24	11.7937	44.0119	1.46979	chr14(-):105403590-105444694
TC12001106.hg.1	5.7e-41	1.8e-42	18.0189	85.8575	1.46914	chr12(-):2966847-2986321
TC06003299.hg.1	8.88e-25	8.03e-26	12.3226	47.5834	1.46867	chr6(-):1767197-1806933
TC0X002048.hg.1	3.6e-34	1.75e-35	15.5966	69.7824	1.46857	chrX(-):45604651-45710969
TC10000022.hg.1	1.31e-47	2.73e-49	20.4736	101.548	1.46821	chr10(+):3109712-3179904
TC02000954.hg.1	8.73e-20	1.11e-20	10.5619	35.792	1.46771	chr2(+):158114110-158170723
TC01001805.hg.1	4.86e-24	4.62e-25	12.0648	45.8403	1.46631	chr1(+):218518676-218617961
TC07003107.hg.1	1.55e-29	1.03e-30	13.9771	58.8202	1.4657	chr7(-):107588859-107590472
TC12001829.hg.1	8.93e-32	5.13e-33	14.757	64.1121	1.46544	chr12(-):95470525-95611240
TC08002073.hg.1	1.41e-31	8.17e-33	14.6883	63.6471	1.46447	chr8(+):119633240-119738306
TC04000434.hg.1	6.04e-23	6.15e-24	11.6821	43.2607	1.46335	chr4(+):78978724-79465423
TC05001996.hg.1	1.55e-47	3.26e-49	20.4452	101.371	1.46058	chr5(-):158584417-158637061
TC14002040.hg.1	9.98e-26	8.48e-27	12.6533	49.825	1.4604	chr14(-):62214090-62215283
TC11002851.hg.1	2.57e-20	3.16e-21	10.7516	37.0459	1.45923	chr11(+):103024204-103041679
TC04001615.hg.1	7.22e-53	1.09e-54	22.5017	113.97	1.45897	chr4(-):146678779-146859787
TC03000139.hg.1	7.79e-53	1.17e-54	22.489	113.894	1.45783	chr3(+):27674555-27675211
TC07002218.hg.1	3.53e-17	5.49e-18	9.61552	29.6279	1.45652	chr7(+):27401265-27449622
TC02004497.hg.1	8.98e-36	3.95e-37	16.1609	73.5696	1.45408	chr2(-):111132687-111142113
TC02000952.hg.1	2.25e-58	2.32e-60	24.7285	127.013	1.45368	chr2(+):157291802-157470247
TC01001758.hg.1	7.47e-45	1.86e-46	19.4406	95.0288	1.45318	chr1(+):211499957-211548288
TC17001354.hg.1	2.93e-34	1.42e-35	15.6279	69.9928	1.45208	chr17(-):31157237-31157347
TC10002663.hg.1	1.48e-48	2.9e-50	20.833	103.786	1.44838	chr10(-):61566681-61666308
TC16001171.hg.1	9.91e-41	3.18e-42	17.9318	85.2891	1.44801	chr16(-):66648653-66730610
TC10001411.hg.1	3.13e-43	8.53e-45	18.8437	91.2049	1.44794	chr10(-):75257296-75385711
TC17002248.hg.1	4.65e-40	1.56e-41	17.6888	83.698	1.44734	chr17(+):45127769-45128881
TC02004506.hg.1	2.12e-26	1.73e-27	12.8873	51.4129	1.44654	chr2(-):112249520-112252388
TC13000872.hg.1	3.6e-45	8.73e-47	19.5591	95.7828	1.44579	chr13(-):110801310-110959496
TC12003055.hg.1	7.93e-35	3.71e-36	15.8275	71.3345	1.44561	chr12(-):105413562-105478341
TC07000719.hg.1	3.03e-42	8.75e-44	18.4835	88.8785	1.44542	chr7(+):115893170-115895118
TC07002464.hg.1	8.99e-34	4.5e-35	15.4567	68.8398	1.44492	chr7(+):94924144-94925727
TC02003219.hg.1	1.83e-39	6.41e-41	17.4742	82.2877	1.44118	chr2(+):47630345-47657022
TC15000464.hg.1	3.33e-27	2.58e-28	13.1662	53.3079	1.44094	chr15(+):60678230-60678259
TC08002099.hg.1	2.28e-35	1.03e-36	16.0178	72.6115	1.43943	chr8(+):128806779-129113503
TC05000244.hg.1	1.23e-30	7.55e-32	14.361	61.4276	1.43925	chr5(+):56152975-56153078
TC06002025.hg.1	8.24e-42	2.45e-43	18.3247	87.849	1.43585	chr6(-):112429134-112576141
TC14000387.hg.1	2.19e-33	1.13e-34	15.3209	67.9245	1.43291	chr14(+):64331106-64340724
TC10000373.hg.1	5.91e-35	2.74e-36	15.8726	71.6376	1.43013	chr10(+):62538089-62554610
TC01002186.hg.1	1.21e-45	2.83e-47	19.7365	96.9089	1.42958	chr1(-):9789079-9884584
TC13000150.hg.1	1.59e-52	2.44e-54	22.3674	113.163	1.42835	chr13(+):42614172-42830716
TC11002293.hg.1	5.55e-22	6.05e-23	11.3428	40.9832	1.42732	chr11(-):112013974-112034840
TC06002631.hg.1	8.37e-32	4.79e-33	14.7669	64.1795	1.42705	chr6(+):25297378-25298038
TC11001517.hg.1	4.73e-36	2.05e-37	16.2593	74.2275	1.4242	chr11(-):28042163-28129746
TC14001022.hg.1	2.04e-31	1.2e-32	14.632	63.2655	1.42326	chr14(-):34393421-34638972
TC03000768.hg.1	3.99e-27	3.1e-28	13.1391	53.1237	1.422	chr3(+):142315229-142432506
TC06001342.hg.1	5.65e-34	2.78e-35	15.5281	69.3208	1.42197	chr6(-):26031817-26032289
TC08000692.hg.1	2.09e-30	1.31e-31	14.2801	60.8787	1.42142	chr8(+):119633240-119738306
TC07002426.hg.1	4.84e-40	1.63e-41	17.6828	83.6583	1.42104	chr7(+):77200471-77214888
TC18000538.hg.1	1.64e-37	6.49e-39	16.7766	77.6752	1.42013	chr18(-):55313658-55470327
TC16001050.hg.1	9.66e-34	4.85e-35	15.4457	68.7657	1.41942	chr16(-):31142754-31147151
TC15002185.hg.1	3.02e-33	1.57e-34	15.2719	67.5939	1.41932	chr15(+):45742463-45771942
TC01003188.hg.1	1.02e-46	2.25e-48	20.1369	99.4372	1.41719	chr1(-):149784780-149785236
TC11002082.hg.1	1.28e-22	1.33e-23	11.5673	42.489	1.41707	chr11(-):74165886-74178673
TC12001964.hg.1	1.35e-35	6e-37	16.0987	73.1529	1.4161	chr12(-):110934157-110934226
TC04000416.hg.1	9.51e-21	1.13e-21	10.9055	38.0667	1.41579	chr4(+):75858285-75975325
TC07002863.hg.1	8.22e-35	3.84e-36	15.8221	71.2985	1.41448	chr7(-):29553840-29603286
TC11001195.hg.1	1.75e-51	2.85e-53	21.9605	110.705	1.41395	chr11(+):130029457-130080356
TC11002894.hg.1	2.25e-24	2.09e-25	12.1817	46.6302	1.41378	chr11(+):117073731-117075072
TC12002866.hg.1	2.87e-45	6.92e-47	19.5957	96.0154	1.41274	chr12(-):49521755-49580621
TC06000178.hg.1	7.15e-46	1.65e-47	19.8214	97.4469	1.41188	chr6(+):26273144-26273640
TC07000111.hg.1	5.75e-22	6.27e-23	11.3375	40.9479	1.41145	chr7(+):16793160-16824161
TC03003170.hg.1	1.15e-31	6.66e-33	14.7185	63.8517	1.4104	chr3(-):155203177-155394205
TC10002200.hg.1	7.84e-32	4.48e-33	14.7769	64.2469	1.40974	chr10(+):91465047-91488964
TC14000323.hg.1	1.02e-54	1.39e-56	23.2328	118.322	1.40786	chr14(+):55595762-55612148
TC14001141.hg.1	4.12e-33	2.16e-34	15.2245	67.2741	1.40365	chr14(-):53106634-53162432
TC01006108.hg.1	3.97e-36	1.7e-37	16.2865	74.4097	1.40316	chr1(-):214522047-214523573
TC01003173.hg.1	6.8e-31	4.12e-32	14.4502	62.0328	1.40261	chr1(-):149400064-149400109
TC01003679.hg.1	1.81e-32	9.92e-34	14.9993	65.7524	1.40187	chr1(-):200520625-200589862
TC12002771.hg.1	2.93e-17	4.52e-18	9.64562	29.8212	1.40145	chr12(-):13523605-13529679
TC06002044.hg.1	1.14e-22	1.19e-23	11.5848	42.6063	1.40099	chr6(-):116440085-116479910
TC11002123.hg.1	6.71e-49	1.28e-50	20.9648	104.603	1.40023	chr11(-):77032752-77185108
TC03001629.hg.1	4.45e-39	1.58e-40	17.3369	81.3833	1.39981	chr3(-):107761941-107809935
TC06000633.hg.1	2.44e-43	6.6e-45	18.8835	91.4611	1.39977	chr6(+):47445525-47594999
TC12000793.hg.1	2.73e-30	1.72e-31	14.24	60.6065	1.39739	chr12(+):102271105-102317401
TC10000670.hg.1	6.39e-35	2.96e-36	15.8607	71.5573	1.39457	chr10(+):95753746-96088149
TC07002985.hg.1	5.04e-25	4.49e-26	12.4082	48.1634	1.39293	chr7(-):64439557-64442405
TC01005883.hg.1	4.12e-45	1.01e-46	19.5368	95.6412	1.39286	chr1(-):159888187-159888443
TC06003302.hg.1	1.07e-25	9.09e-27	12.6431	49.7555	1.38898	chr6(-):1948760-1949249
TC08001551.hg.1	5.87e-28	4.3e-29	13.4291	55.0953	1.38863	chr8(-):119201694-119634234
TC02002098.hg.1	2.02e-44	5.2e-46	19.2795	94.0004	1.38827	chr2(-):96514587-96657541
TC08001590.hg.1	8.13e-38	3.14e-39	16.8857	78.3991	1.38811	chr8(-):124510127-124553493
TC18000047.hg.1	7.47e-26	6.3e-27	12.6969	50.1207	1.38808	chr18(+):9708228-9862553
TC05000561.hg.1	3.06e-40	1.02e-41	17.7544	84.1276	1.38799	chr5(+):118310281-118310362
TC12000172.hg.1	3.06e-40	1.02e-41	17.7544	84.1276	1.38799	chr12(+):12264886-12264967
TC12001190.hg.1	3.06e-40	1.02e-41	17.7544	84.1276	1.38799	chr12(-):9392066-9392147
TC20000063.hg.1	1.87e-39	6.54e-41	17.4712	82.2678	1.38759	chr20(+):5931298-5975852
TC06003300.hg.1	2.01e-23	1.99e-24	11.8491	44.3847	1.38666	chr6(-):1931750-1933685
TC06001313.hg.1	9.29e-28	6.9e-29	13.3597	54.6235	1.38493	chr6(-):20100935-20212670
TC13001352.hg.1	1.61e-46	3.59e-48	20.063	98.9718	1.38427	chr13(-):21946716-21948651
TC03000978.hg.1	5.12e-44	1.34e-45	19.1316	93.0543	1.38359	chr3(+):182971032-183016292
TC02000407.hg.1	5.23e-28	3.82e-29	13.4466	55.2144	1.38318	chr2(+):69871557-70053596
TC01001622.hg.1	1.78e-17	2.7e-18	9.725	30.3321	1.38027	chr1(+):192544857-192549161
TC08001736.hg.1	5.62e-38	2.16e-39	16.9424	78.7755	1.38003	chr8(-):144939497-144952632
TC05002656.hg.1	1.13e-24	1.03e-25	12.2866	47.3399	1.37853	chr5(+):139554736-139623371
TC01003977.hg.1	1.16e-50	2e-52	21.6406	108.758	1.37782	chr1(-):233119881-233431459
TC05002434.hg.1	8.68e-27	6.9e-28	13.0219	52.3272	1.37732	chr5(+):71403313-71491128
TC06000270.hg.1	7.55e-50	1.36e-51	21.3286	106.847	1.3764	chr6(+):27861203-27861669
TC08000646.hg.1	7.69e-36	3.38e-37	16.1844	73.7267	1.3762	chr8(+):104383743-104395232
TC16000400.hg.1	1.89e-32	1.04e-33	14.9929	65.7093	1.37602	chr16(+):33778865-33786528
TC02000537.hg.1	3.72e-35	1.7e-36	15.9433	72.1119	1.37556	chr2(+):87990684-87990786
TC02002208.hg.1	3.72e-35	1.7e-36	15.9433	72.1119	1.37556	chr2(-):112017215-112017317
TC15000930.hg.1	1.7e-44	4.34e-46	19.3075	94.1796	1.37551	chr15(+):94774767-95027181
TC12000495.hg.1	1.56e-33	7.96e-35	15.3724	68.2718	1.37502	chr12(+):56324756-56347811
TC07003044.hg.1	3.59e-20	4.45e-21	10.7001	36.7052	1.37498	chr7(-):81575760-81578977
TC19001836.hg.1	1.07e-50	1.83e-52	21.6556	108.85	1.37423	chr19(-):54663834-54676944
TC11002175.hg.1	4.24e-28	3.07e-29	13.4784	55.4305	1.3742	chr11(-):88026760-88070955
TC09001017.hg.1	7.92e-23	8.13e-24	11.6407	42.9824	1.37295	chr9(-):33624288-33624316
TC19001806.hg.1	3.05e-44	7.89e-46	19.2142	93.5833	1.37223	chr19(-):53341785-53360902
TC17001904.hg.1	4.7e-25	4.17e-26	12.4189	48.236	1.37054	chr17(-):74620845-74639894
TC21000487.hg.1	2.86e-25	2.5e-26	12.4943	48.747	1.37027	chr21(-):43791996-43816955
TC02004385.hg.1	7.39e-62	5.95e-64	26.1967	135.27	1.36938	chr2(-):86730553-86790620
TC13000866.hg.1	1.6e-17	2.42e-18	9.74198	30.4415	1.36836	chr13(-):108439709-108487799
TC01001583.hg.1	1.8e-39	6.29e-41	17.4769	82.3059	1.36647	chr1(+):182992595-183114727
TC12000779.hg.1	1.77e-22	1.86e-23	11.5178	42.1567	1.36577	chr12(+):100967461-101018697
TC02002120.hg.1	8.06e-51	1.37e-52	21.7023	109.135	1.36558	chr2(-):98108235-98206428
TC02003640.hg.1	1.35e-46	2.99e-48	20.092	99.1545	1.36443	chr2(+):153574407-153617767
TC01001461.hg.1	1.53e-56	1.8e-58	23.975	122.67	1.36267	chr1(+):167690429-167761156
TC06001353.hg.1	1.16e-38	4.25e-40	17.1875	80.3971	1.36113	chr6(-):26250369-26250835
TC15000614.hg.1	9.54e-45	2.4e-46	19.4007	94.7746	1.36054	chr15(+):66797431-66841823
TC01002289.hg.1	9.24e-52	1.48e-53	22.0689	111.362	1.35913	chr1(-):17733251-17766250
TC17002670.hg.1	1.14e-39	3.95e-41	17.5479	82.7723	1.35875	chr17(-):43583249-43597889
TC01002337.hg.1	8.62e-19	1.18e-19	10.204	33.4419	1.35804	chr1(-):23516993-23520755
TC0X000357.hg.1	1.09e-22	1.13e-23	11.5924	42.6573	1.35782	chrX(+):65382391-65488709
TC12001226.hg.1	5.77e-37	2.35e-38	16.5832	76.3888	1.35725	chr12(-):10771538-10826891
TC12001910.hg.1	1.99e-33	1.02e-34	15.336	68.0264	1.35597	chr12(-):105413562-105478355
TC11002162.hg.1	3.17e-29	2.14e-30	13.8695	58.0894	1.35552	chr11(-):85405265-85522184
TC12000189.hg.1	8.45e-20	1.08e-20	10.5669	35.825	1.35519	chr12(+):13349602-13369708
TC15000752.hg.1	5.33e-18	7.76e-19	9.91666	31.5709	1.35505	chr15(+):81071684-81244117
TC20001393.hg.1	3.83e-33	2.01e-34	15.2355	67.3479	1.35444	chr20(-):3907958-3911562
TC01003817.hg.1	1.75e-51	2.84e-53	21.9614	110.711	1.35436	chr1(-):214517515-214725792
TC02000589.hg.1	6.87e-49	1.31e-50	20.9607	104.578	1.35339	chr2(+):97779233-97930258
TC02004411.hg.1	1.65e-47	3.46e-49	20.4355	101.31	1.35246	chr2(-):96592962-96658969
TC08001138.hg.1	2.15e-36	9.05e-38	16.3812	75.0421	1.35145	chr8(-):37716136-37757015
TC06002634.hg.1	2.07e-38	7.68e-40	17.0981	79.8061	1.35138	chr6(+):25454469-25454788
TC0X000475.hg.1	9.05e-40	3.1e-41	17.5847	83.0145	1.35115	chrX(+):100353178-100418670
TC12000992.hg.1	8.65e-42	2.58e-43	18.3171	87.7992	1.34998	chr12(+):124155660-124192950
TC0X000337.hg.1	6.36e-29	4.39e-30	13.7641	57.3728	1.3481	chrX(+):56100757-56102014
TC6_apd_hap1000030.hg.1	4.07e-58	4.27e-60	24.6222	126.404	1.3478	chr6_apd_hap1
TC04001959.hg.1	7.12e-18	1.05e-18	9.87073	31.2734	1.3476	chr4(+):30729935-30731607
TC17000604.hg.1	1.17e-40	3.75e-42	17.9065	85.1233	1.3469	chr17(+):45124512-45127790
TC06002880.hg.1	3.26e-33	1.69e-34	15.2605	67.5168	1.34606	chr6(+):76542604-76550975
TC03002705.hg.1	7.02e-33	3.75e-34	15.1431	66.7243	1.34471	chr3(+):185543989-185545049
TC10001317.hg.1	4.14e-50	7.33e-52	21.4288	107.462	1.34436	chr10(-):61548506-61666414
TC09002163.hg.1	1.99e-32	1.09e-33	14.9849	65.6551	1.34266	chr9(+):109625382-109689383
TC01001430.hg.1	1.31e-34	6.21e-36	15.7507	70.8189	1.34155	chr1(+):163291690-163325554
TC05000734.hg.1	2.17e-17	3.33e-18	9.69288	30.1252	1.33868	chr5(+):140090860-140090958
TC21000944.hg.1	2.16e-30	1.35e-31	14.2756	60.8481	1.33756	chr21(-):36195761-36198703
TC01001047.hg.1	1.25e-19	1.62e-20	10.5057	35.4215	1.33714	chr1(+):120906461-120906507
TC04000155.hg.1	2.84e-34	1.37e-35	15.6329	70.0267	1.33624	chr4(+):17812525-17846487
TC21000762.hg.1	5.93e-46	1.36e-47	19.852	97.6401	1.33592	chr21(+):44985070-44985529
TC01003208.hg.1	9.1e-43	2.54e-44	18.6744	90.1132	1.33504	chr1(-):150618701-150669672
TC14001154.hg.1	6.87e-41	2.18e-42	17.9897	85.6668	1.33313	chr14(-):55405656-55493823
TC15000449.hg.1	4e-36	1.72e-37	16.2854	74.4024	1.33248	chr15(+):59397277-59417244
TC12001803.hg.1	3.22e-22	3.45e-23	11.4262	41.5421	1.33176	chr12(-):91496406-91505608
TC18000651.hg.1	9.02e-26	7.64e-27	12.6686	49.9288	1.33161	chr18(+):20494086-20495448
TC04000772.hg.1	4.25e-20	5.3e-21	10.6737	36.53	1.32889	chr4(+):154229872-154229897
TC10001160.hg.1	4.43e-57	5.03e-59	24.1942	123.941	1.32782	chr10(-):32297938-32345371
TC06000172.hg.1	1.07e-43	2.83e-45	19.0152	92.3081	1.32744	chr6(+):26204858-26206266
TC10002227.hg.1	2.18e-32	1.2e-33	14.9713	65.5628	1.32724	chr10(+):96372044-96373661
TC05001955.hg.1	4.6e-42	1.35e-43	18.417	88.448	1.32417	chr5(-):151040657-151066726
TC17001157.hg.1	4.08e-29	2.78e-30	13.8309	57.8268	1.32411	chr17(-):15133095-15168644
TC05001184.hg.1	1.62e-42	4.61e-44	18.5822	89.5178	1.32392	chr5(-):16662016-16936385
TC21000186.hg.1	2.08e-36	8.75e-38	16.3863	75.0759	1.32323	chr21(+):42552024-42552553
TC22001187.hg.1	1.97e-28	1.4e-29	13.5936	56.2133	1.32294	chr22(-):16117749-16127623
TC03001651.hg.1	1.69e-17	2.55e-18	9.73361	30.3875	1.32085	chr3(-):112323407-112368377
TC17000399.hg.1	2.29e-49	4.23e-51	21.1441	105.711	1.32041	chr17(+):33914282-34053436
TC05001657.hg.1	1.05e-32	5.66e-34	15.0822	66.3125	1.31987	chr5(-):106712590-107006596
TC04002890.hg.1	1.12e-26	8.98e-28	12.9832	52.0646	1.31845	chr4(-):187510227-187516954
TC10001732.hg.1	1.4e-66	7.59e-69	28.278	146.519	1.31777	chr10(-):126676418-126849739
TC08001640.hg.1	2.17e-45	5.19e-47	19.641	96.3031	1.3173	chr8(-):131016774-131016847
TC06001343.hg.1	8.15e-41	2.6e-42	17.9627	85.4909	1.31653	chr6(-):26033320-26033796
TC13000539.hg.1	4.67e-30	3e-31	14.1583	60.0515	1.31591	chr13(-):31710762-31736525
TC08000506.hg.1	9.48e-33	5.1e-34	15.0975	66.416	1.31467	chr8(+):79578282-79631997
TC18000208.hg.1	1.42e-44	3.6e-46	19.3368	94.3666	1.31412	chr18(+):56529832-56653712
TC04000545.hg.1	2.73e-38	1.03e-39	17.0544	79.5175	1.31355	chr4(+):106482748-106491395
TC02004410.hg.1	6.37e-35	2.96e-36	15.8611	71.5603	1.31225	chr2(-):96523088-96533219
TC17000328.hg.1	2.33e-36	9.86e-38	16.3684	74.9563	1.31132	chr17(+):27050699-27050772
TC15000635.hg.1	2.65e-25	2.32e-26	12.5055	48.8229	1.311	chr15(+):69591286-69700119
3437076_st	2.66e-46	6e-48	19.9816	98.4591	1.31075	normgene->exon
TC01001018.hg.1	1.06e-39	3.66e-41	17.5594	82.8482	1.31055	chr1(+):116915004-116952883
TC16000455.hg.1	4.36e-23	4.39e-24	11.7319	43.5956	1.30978	chr16(+):55542910-55620582
TC01001358.hg.1	8.37e-23	8.61e-24	11.6322	42.9249	1.30747	chr1(+):159931008-159948876
TC15002216.hg.1	2.15e-36	9.05e-38	16.3812	75.0421	1.30747	chr15(+):59148026-59149750
TC06003649.hg.1	2.07e-45	4.94e-47	19.6486	96.3518	1.30604	chr6(-):42096420-42110415
TC20001661.hg.1	2.16e-31	1.27e-32	14.6236	63.2083	1.30596	chr20(-):54944466-54965722
TC07000537.hg.1	5.26e-21	6.13e-22	10.9974	38.6778	1.30537	chr7(+):89796904-89870091
3213027_st	3.49e-39	1.24e-40	17.3745	81.6315	1.30477	normgene->exon
TC10002885.hg.1	1.02e-22	1.06e-23	11.6019	42.7216	1.30408	chr10(-):127700956-127703336
TC17000705.hg.1	9.92e-42	2.97e-43	18.2955	87.6587	1.30393	chr17(+):55333212-55757658
TC06003303.hg.1	7.2e-23	7.37e-24	11.6552	43.0799	1.3037	chr6(-):1949489-1949978
TC19001721.hg.1	7.47e-39	2.71e-40	17.2559	80.8489	1.30228	chr19(-):50138549-50143400
TC12000082.hg.1	8.66e-41	2.76e-42	17.9532	85.4285	1.30227	chr12(+):6602545-6641132
TC02002612.hg.1	2.39e-33	1.23e-34	15.3076	67.8346	1.30152	chr2(-):189896622-190044605
TC18000436.hg.1	3.89e-26	3.23e-27	12.7952	50.7881	1.30122	chr18(-):28645940-28682388
TC02002819.hg.1	5.21e-38	1.99e-39	16.9545	78.8557	1.30068	chr2(-):224616403-224702744
TC06000747.hg.1	6.93e-35	3.23e-36	15.8481	71.4728	1.30021	chr6(+):76458909-76629254
TC21000424.hg.1	1.02e-29	6.64e-31	14.0413	59.2568	1.29922	chr21(-):36195761-36198703
TC17001606.hg.1	4.09e-22	4.41e-23	11.3896	41.2968	1.2992	chr17(-):43622992-43623019
TC12000264.hg.1	6.05e-22	6.6e-23	11.3298	40.8964	1.29917	chr12(+):27485787-27578746
TC06002630.hg.1	5.68e-31	3.41e-32	14.4777	62.2194	1.29875	chr6(+):25292177-25292479
TC01001607.hg.1	3.62e-21	4.16e-22	11.0551	39.0618	1.29221	chr1(+):186798032-186958113
TC08000729.hg.1	9.9e-21	1.18e-21	10.8993	38.0253	1.29133	chr8(+):126010720-126034525
TC17001603.hg.1	1.26e-38	4.63e-40	17.1748	80.3132	1.29094	chr17(-):43578684-43597889
TC07001747.hg.1	1.56e-38	5.77e-40	17.1414	80.093	1.29073	chr7(-):107564244-107643804
PSR04025533.hg.1	2.09e-48	4.11e-50	20.7769	103.438	1.28917	19178645
TC12001470.hg.1	2.43e-46	5.47e-48	19.9961	98.5503	1.2886	chr12(-):49521565-49525304
TC12000363.hg.1	2.91e-46	6.58e-48	19.9671	98.3672	1.28849	chr12(+):49469481-49469506
TC02002376.hg.1	1.27e-41	3.82e-43	18.2567	87.407	1.28573	chr2(-):136597196-136634011
TC11002211.hg.1	2.38e-34	1.14e-35	15.66	70.2091	1.28492	chr11(-):95709762-96076382
TC0X000969.hg.1	3.98e-40	1.33e-41	17.7138	83.8614	1.28459	chrX(-):41374187-41782716
TC03001695.hg.1	5.29e-33	2.79e-34	15.1866	67.0179	1.28421	chr3(-):121150273-121265488
TC01002477.hg.1	1.05e-46	2.31e-48	20.133	99.4128	1.28417	chr1(-):33360195-33367039
TC04002813.hg.1	9.25e-35	4.33e-36	15.8042	71.1778	1.2827	chr4(-):170037423-170192107
TC02002210.hg.1	1.28e-24	1.17e-25	12.2671	47.2078	1.28219	chr2(-):112249520-112252388
TC02004804.hg.1	2.58e-48	5.12e-50	20.7417	103.219	1.2818	chr2(-):215632203-215674388
PSR16011484.hg.1	3.69e-53	5.45e-55	22.6167	114.659	1.27621	19474656
TC22000301.hg.1	2.86e-33	1.48e-34	15.2806	67.6526	1.27573	chr22(+):38864067-38879452
TC02001948.hg.1	7.66e-34	3.82e-35	15.4813	69.0057	1.27466	chr2(-):69546901-69614386
TC0X001828.hg.1	3.04e-41	9.4e-43	18.1183	86.5058	1.27316	chrX(+):109418975-109421014
TC6_dbb_hap3000070.hg.1	3.11e-17	4.81e-18	9.63604	29.7597	1.27228	chr6_dbb_hap3
TC19000180.hg.1	1.01e-47	2.09e-49	20.5164	101.815	1.27107	chr19(+):10713121-10755235
3213015_st	3.34e-24	3.13e-25	12.1219	46.2259	1.27018	normgene->exon
PSR07002507.hg.1	1.49e-40	4.82e-42	17.8682	84.873	1.2686	19244905
TC02000412.hg.1	3.83e-22	4.12e-23	11.3997	41.3643	1.26782	chr2(+):70157400-70160078
TC03003122.hg.1	4.58e-47	9.91e-49	20.2676	100.258	1.26771	chr3(-):141876369-141944449
TC03003258.hg.1	4.46e-17	7e-18	9.57789	29.3864	1.26739	chr3(-):187553660-187574106
TC02001089.hg.1	1.43e-39	4.97e-41	17.5128	82.5417	1.26738	chr2(+):183580999-183653542
TC08002450.hg.1	8.63e-42	2.57e-43	18.3174	87.8013	1.26693	chr8(-):101946568-101949291
TC08002101.hg.1	4.58e-32	2.58e-33	14.8584	64.7993	1.26678	chr8(+):129000923-129004320
TC07002957.hg.1	3.01e-55	3.92e-57	23.4478	119.588	1.26631	chr7(-):55748767-55780945
TC6_cox_hap2000079.hg.1	3.42e-17	5.31e-18	9.62071	29.6612	1.26555	chr6_cox_hap2
TC03000910.hg.1	1.41e-31	8.16e-33	14.6885	63.6487	1.26473	chr3(+):169755717-169803191
TC10000420.hg.1	4.27e-49	8.05e-51	21.0398	105.068	1.26466	chr10(+):71211226-71267425
3706874_st	4.05e-19	5.42e-20	10.3226	34.2179	1.26412	normgene->exon
TC10002734.hg.1	5.53e-35	2.55e-36	15.8829	71.7064	1.26333	chr10(-):81914852-81915153
TC10000476.hg.1	5.77e-42	1.7e-43	18.3814	88.2168	1.26188	chr10(+):75754951-75879918
TC02004970.hg.1	1.05e-29	6.9e-31	14.0358	59.2189	1.25933	chr2(+):70142173-70170077
TC08001486.hg.1	1.64e-41	4.99e-43	18.2154	87.1383	1.2592	chr8(-):101946568-101949291
TC04001600.hg.1	1.26e-29	8.29e-31	14.0089	59.0363	1.25917	chr4(-):142944313-143768585
TC16000193.hg.1	6.97e-57	8.02e-59	24.1137	123.474	1.25707	chr16(+):16043434-16236931
TC02002217.hg.1	1.28e-35	5.67e-37	16.107	73.209	1.25597	chr2(-):113493930-113522254
TC04002701.hg.1	1.02e-20	1.22e-21	10.8943	37.9922	1.2557	chr4(-):122589153-122589620
TC06000087.hg.1	1.69e-19	2.21e-20	10.4586	35.1114	1.25535	chr6(+):12290529-12297427
TC17002645.hg.1	1.27e-35	5.64e-37	16.1078	73.2142	1.25475	chr17(-):41196312-41277340
TC16001088.hg.1	3.34e-29	2.26e-30	13.8616	58.0353	1.25341	chr16(-):47115431-47177936
TC03001255.hg.1	6.66e-29	4.6e-30	13.7571	57.3251	1.25308	chr3(-):27414214-27525911
TC14001926.hg.1	1.29e-22	1.35e-23	11.5656	42.4777	1.25295	chr14(-):23242432-23285101
TC20000839.hg.1	6.15e-33	3.26e-34	15.1635	66.8621	1.25196	chr20(-):37055949-37056086
TC06002644.hg.1	8.57e-40	2.93e-41	17.5932	83.0705	1.25115	chr6(+):26204874-26205181
TC01001736.hg.1	9e-28	6.67e-29	13.3647	54.6576	1.25021	chr1(+):207494817-207534311
TC21000738.hg.1	9.79e-25	8.86e-26	12.308	47.4852	1.25012	chr21(+):42651026-42654455
TC04000196.hg.1	7.55e-23	7.74e-24	11.6479	43.0303	1.24999	chr4(+):30722030-31148423
TC10002146.hg.1	9.73e-39	3.55e-40	17.2147	80.5774	1.24996	chr10(+):79492934-79494076
TC07001605.hg.1	6.52e-18	9.57e-19	9.88462	31.3633	1.24974	chr7(-):92728826-92747336
TC06000945.hg.1	1.47e-25	1.26e-26	12.5955	49.4327	1.2497	chr6(+):121756745-121770873
TC12001489.hg.1	1.27e-39	4.41e-41	17.5308	82.6603	1.24837	chr12(-):50370706-50419307
TC19001656.hg.1	3.47e-38	1.31e-39	17.0172	79.2712	1.24782	chr19(-):47278140-47291851
TC09000207.hg.1	2.92e-30	1.85e-31	14.2295	60.535	1.24756	chr9(+):36572859-36677679
TC18000318.hg.1	4.94e-43	1.36e-44	18.7711	90.7372	1.24682	chr18(-):9546789-9614600
TC17002249.hg.1	1.02e-35	4.48e-37	16.1422	73.4441	1.24444	chr17(+):45500843-45504056
TC08001485.hg.1	2.65e-63	1.93e-65	26.8196	138.692	1.24261	chr8(-):101930804-101965623
TC02001139.hg.1	4.37e-43	1.2e-44	18.7906	90.8632	1.24251	chr2(+):196440701-196602426
TC06001604.hg.1	2.98e-23	2.97e-24	11.7899	43.9861	1.24197	chr6(-):33840037-33840068
TC07000110.hg.1	3e-40	9.93e-42	17.7579	84.151	1.24141	chr7(+):16685756-16746148
TC12000679.hg.1	3.26e-47	6.98e-49	20.3234	100.608	1.24116	chr12(+):83080659-83528649
PSR07002501.hg.1	6.15e-42	1.82e-43	18.3709	88.1488	1.24077	19244900
TC06003304.hg.1	7.53e-23	7.72e-24	11.6484	43.034	1.24072	chr6(-):1950463-1952398
TC01001212.hg.1	3.86e-46	8.78e-48	19.9213	98.0783	1.24025	chr1(+):151512781-151556059
TC19002567.hg.1	1.64e-36	6.87e-38	16.4224	75.3169	1.24011	chr19(-):53269496-53269856
TC11000790.hg.1	5.08e-35	2.34e-36	15.8956	71.7915	1.23904	chr11(+):74303575-74354102
TC11001124.hg.1	3.44e-22	3.7e-23	11.4159	41.4732	1.23786	chr11(+):123396344-123498482
TC01000863.hg.1	1.17e-39	4.05e-41	17.5439	82.7462	1.23775	chr1(+):93913658-94020218
TC09000316.hg.1	2.34e-22	2.48e-23	11.4751	41.8702	1.2372	chr9(+):71320575-71624092
TC12000276.hg.1	1.32e-27	9.92e-29	13.3064	54.2613	1.23648	chr12(+):29302133-29487006
TC04000083.hg.1	1.61e-21	1.8e-22	11.18	39.8948	1.23631	chr4(+):7755817-7780654
TC19001804.hg.1	7.46e-38	2.87e-39	16.8991	78.4882	1.23606	chr19(-):53268747-53290034
3437066_st	7.02e-30	4.55e-31	14.097	59.635	1.23496	normgene->exon
TC07001452.hg.1	4.23e-23	4.25e-24	11.7368	43.6288	1.23328	chr7(-):64434830-64467124
TC20000822.hg.1	6.2e-41	1.96e-42	18.0059	85.7725	1.2327	chr20(-):35624752-35724410
3022534_st	3.47e-33	1.81e-34	15.2507	67.451	1.23207	normgene->exon
TC01005354.hg.1	7.55e-42	2.24e-43	18.3387	87.9398	1.23202	chr1(-):27425307-27481403
TC05001393.hg.1	2.72e-27	2.09e-28	13.1968	53.516	1.23121	chr5(-):60047616-60140216
TC01003629.hg.1	6.84e-40	2.32e-41	17.6285	83.302	1.23021	chr1(-):185265520-185286461
TC0X001530.hg.1	4.66e-36	2.01e-37	16.2618	74.2446	1.22981	chrX(-):153576892-153603006
TC01003239.hg.1	5.86e-49	1.11e-50	20.9874	104.743	1.22953	chr1(-):151955386-151966866
PSR07002506.hg.1	6.66e-49	1.27e-50	20.9662	104.612	1.22768	19244904
TC07002047.hg.1	1.11e-33	5.59e-35	15.4246	68.6238	1.22751	chr7(-):152341864-152373250
TC09000347.hg.1	3.34e-21	3.84e-22	11.0674	39.1437	1.2261	chr9(+):78505560-78977255
TC02000941.hg.1	2.32e-41	7.11e-43	18.1612	86.7855	1.22449	chr2(+):153191751-153506348
TC06000009.hg.1	2.17e-31	1.27e-32	14.6228	63.2032	1.22424	chr6(+):1312675-1314993
TC04001455.hg.1	1.08e-54	1.48e-56	23.2229	118.263	1.22226	chr4(-):108511433-108641608
TC10001444.hg.1	1.48e-29	9.81e-31	13.9841	58.868	1.22162	chr10(-):79541030-79541072
TC15002251.hg.1	1.15e-32	6.23e-34	15.068	66.2169	1.22099	chr15(+):67457682-67473649
PSR11023315.hg.1	7.41e-44	1.95e-45	19.0727	92.6768	1.22033	19381218
TC03002752.hg.1	6.37e-33	3.38e-34	15.1582	66.8261	1.2197	chr3(+):195367106-195377054
TC02000057.hg.1	3.27e-39	1.16e-40	17.3844	81.6963	1.21894	chr2(+):10262455-10271546
3213017_st	1.46e-27	1.1e-28	13.2915	54.1597	1.21829	normgene->exon
TC01004863.hg.1	2.04e-30	1.28e-31	14.2839	60.9043	1.21812	chr1(+):180167144-180169859
TC08000695.hg.1	1.7e-31	9.91e-33	14.6598	63.454	1.21784	chr8(+):120177273-120257914
TC02003382.hg.1	2.38e-29	1.6e-30	13.9126	58.3818	1.21755	chr2(+):87754887-87906324
3022525_st	1.36e-38	5.01e-40	17.1626	80.2325	1.2172	normgene->exon
TC02000535.hg.1	1.85e-29	1.23e-30	13.9508	58.6414	1.2157	chr2(+):87754887-87906324
TC10001498.hg.1	4.09e-37	1.65e-38	16.6364	76.7431	1.21553	chr10(-):90694831-90751147
TC05002988.hg.1	1.1e-22	1.14e-23	11.5909	42.6472	1.21545	chr5(-):49692315-49692643
PSR01050386.hg.1	1.12e-38	4.12e-40	17.1923	80.4288	1.2142	19059832
3437060_st	8.17e-45	2.04e-46	19.4258	94.9346	1.21388	normgene->exon
TC02002200.hg.1	2.47e-34	1.19e-35	15.6541	70.1692	1.21258	chr2(-):111132686-111142113
TC06002633.hg.1	1.04e-33	5.25e-35	15.434	68.6869	1.21205	chr6(+):25439997-25440485
PSR11023322.hg.1	4.47e-43	1.23e-44	18.787	90.84	1.21194	19381222
TC15000701.hg.1	1.21e-34	5.72e-36	15.763	70.9012	1.21057	chr15(+):76031604-76031629
2985928_st	1.7e-24	1.56e-25	12.2246	46.9206	1.21057	normgene->exon
PSR02024026.hg.1	8.3e-34	4.14e-35	15.4691	68.9235	1.20936	19096707
TC16001315.hg.1	4.8e-38	1.83e-39	16.9669	78.9377	1.20545	chr16(-):85007787-85045141
TC17000120.hg.1	2.81e-60	2.54e-62	25.5243	131.521	1.20506	chr17(+):7788123-7816078
TC06001729.hg.1	1.68e-46	3.75e-48	20.0561	98.9282	1.2049	chr6(-):42068856-42110715
TC05001714.hg.1	4.38e-25	3.88e-26	12.4296	48.3085	1.20487	chr5(-):121398890-121414206
TC10002480.hg.1	4.8e-38	1.83e-39	16.9669	78.9379	1.20446	chr10(-):14946614-14947829
TC12001494.hg.1	8.14e-28	6.02e-29	13.3799	54.7605	1.20444	chr12(-):50611689-50614726
PSR04025532.hg.1	6.91e-52	1.1e-53	22.1182	111.661	1.20322	19178644
TC15001825.hg.1	1.63e-40	5.29e-42	17.854	84.7797	1.20278	chr15(-):89441914-89456685
TC17000970.hg.1	2.18e-51	3.57e-53	21.9235	110.481	1.2024	chr17(-):906758-1090616
TC08001659.hg.1	5.82e-27	4.57e-28	13.0823	52.7378	1.20153	chr8(-):134249414-134314265
TC02003383.hg.1	7.95e-43	2.21e-44	18.696	90.2531	1.20052	chr2(+):88003962-88013751
TC06004064.hg.1	6.39e-27	5.03e-28	13.0682	52.6419	1.19937	chr6(+):27777842-27779078
TC03001421.hg.1	6.53e-40	2.21e-41	17.6358	83.3499	1.19894	chr3(-):49924435-49941306
TC04002853.hg.1	8.45e-24	8.12e-25	11.9814	45.2776	1.19888	chr4(-):180087670-180091375
TC06001429.hg.1	1.21e-43	3.24e-45	18.994	92.1716	1.19868	chr6(-):27858093-27860884
TC12002644.hg.1	1.07e-27	7.95e-29	13.339	54.4824	1.19827	chr12(+):125514067-125515683
TC04002255.hg.1	2.13e-28	1.52e-29	13.5819	56.1341	1.19796	chr4(+):148402069-148466106
TC16000493.hg.1	7.5e-46	1.74e-47	19.8136	97.3973	1.19741	chr16(+):57653650-57698944
TC20001675.hg.1	1.04e-37	4.04e-39	16.8477	78.1472	1.19723	chr20(-):56807833-56884495
TC07001764.hg.1	1.51e-39	5.24e-41	17.5049	82.4895	1.19713	chr7(-):112405787-112430647
TC11003187.hg.1	6.71e-36	2.93e-37	16.2056	73.8687	1.19712	chr11(-):62619460-62623386
TC01003722.hg.1	4.74e-23	4.79e-24	11.7191	43.5098	1.1969	chr1(-):203309752-203320617
TC16001658.hg.1	1.9e-35	8.51e-37	16.0466	72.8039	1.19687	chr16(+):81417177-81423143
2985934_st	3.02e-30	1.91e-31	14.2248	60.503	1.19604	normgene->exon
TC07000213.hg.1	1.27e-53	1.83e-55	22.7994	115.75	1.19599	chr7(+):32997005-33046543
TC19001274.hg.1	8.39e-43	2.33e-44	18.6877	90.1991	1.19554	chr19(-):17462264-17488148
TC08002291.hg.1	3.69e-33	1.93e-34	15.2412	67.3869	1.19551	chr8(-):37734784-37757007
TC11002788.hg.1	6.15e-29	4.24e-30	13.7691	57.407	1.19527	chr11(+):75283344-75283824
TC17001520.hg.1	1.32e-38	4.86e-40	17.1672	80.2631	1.19453	chr17(-):40023161-40075272
TC02000649.hg.1	5.02e-54	7.02e-56	22.9602	116.707	1.19409	chr2(+):106361354-106510730
TC01006280.hg.1	2.56e-36	1.09e-37	16.3541	74.8607	1.19256	chr1(-):201349966-201368736
TC12002967.hg.1	5.42e-31	3.25e-32	14.4851	62.2693	1.19209	chr12(-):76441478-76441891
TC05000782.hg.1	1.11e-33	5.58e-35	15.4249	68.6258	1.19126	chr5(+):142149949-142608576
TC17001604.hg.1	6.61e-36	2.88e-37	16.208	73.8846	1.19096	chr17(-):43590734-43593064
TC02004860.hg.1	5.53e-18	8.06e-19	9.91097	31.534	1.19087	chr2(-):235401690-235403788
TC01000873.hg.1	9.07e-29	6.32e-30	13.7106	57.009	1.19084	chr1(+):95285898-95360802
TC01002962.hg.1	1.6e-22	1.68e-23	11.5333	42.2609	1.19058	chr1(-):110276554-110284384
TC12001298.hg.1	1.45e-18	2.02e-19	10.1224	32.9092	1.18979	chr12(-):21788275-21910765
TC12000514.hg.1	1.01e-47	2.09e-49	20.5161	101.814	1.1883	chr12(+):56915609-56989980
PSR06007468.hg.1	6.83e-25	6.12e-26	12.3625	47.8536	1.18809	19217701
TC20000840.hg.1	2.62e-35	1.19e-36	15.997	72.472	1.18805	chr20(-):37058310-37058447
TC17001607.hg.1	2.57e-25	2.24e-26	12.5106	48.8575	1.18771	chr17(-):43625257-43625286
TC13001293.hg.1	5.97e-43	1.65e-44	18.7412	90.5448	1.18758	chr13(+):110959631-111138104
TC03000873.hg.1	3.06e-40	1.01e-41	17.7549	84.1314	1.18744	chr3(+):160117062-160152750
TC15000725.hg.1	3.3e-29	2.23e-30	13.8635	58.0483	1.18715	chr15(+):78556428-78574538
TC03000601.hg.1	9.67e-46	2.25e-47	19.7724	97.1364	1.18564	chr3(+):116746375-116746400
TC07001900.hg.1	9.67e-46	2.25e-47	19.7724	97.1364	1.18564	chr7(-):138087839-138087864
TC14000567.hg.1	9.67e-46	2.25e-47	19.7724	97.1364	1.18564	chr14(+):92493740-92493765
TC20000115.hg.1	9.67e-46	2.25e-47	19.7724	97.1364	1.18564	chr20(+):17993521-17993546
TC09001515.hg.1	1.02e-33	5.15e-35	15.4369	68.7066	1.18514	chr9(-):117546915-117568408
PSR06007488.hg.1	4.69e-27	3.66e-28	13.1149	52.9591	1.18503	19217714
TC18000755.hg.1	1.22e-28	8.56e-30	13.666	56.7057	1.18484	chr18(+):66817067-66832387
TC06000265.hg.1	1.11e-35	4.89e-37	16.1293	73.3578	1.18475	chr6(+):27782822-27783267
TC08000520.hg.1	1.5e-32	8.18e-34	15.0277	65.9444	1.18456	chr8(+):82644669-82671750
3213041_st	2.56e-36	1.09e-37	16.3538	74.8589	1.18145	normgene->exon
TC16001271.hg.1	5.42e-33	2.86e-34	15.1829	66.9929	1.18088	chr16(-):74746853-74808730
TC17000355.hg.1	9.81e-36	4.33e-37	16.1474	73.4794	1.18002	chr17(+):29158988-29222295
TC04001038.hg.1	1.37e-27	1.03e-28	13.3012	54.2257	1.17971	chr4(-):11415675-11415784
TC11002346.hg.1	6.62e-25	5.93e-26	12.3672	47.8854	1.17809	chr11(-):118124118-118135251
TC01001781.hg.1	4.75e-36	2.05e-37	16.2588	74.2244	1.17752	chr1(+):213031597-213072705
3520339_st	3.24e-24	3.04e-25	12.1264	46.2568	1.17736	normgene->exon
TC04000768.hg.1	2.93e-37	1.17e-38	16.6879	77.0858	1.17675	chr4(+):153857504-153900848
3437074_st	1.58e-32	8.62e-34	15.02	65.8926	1.17477	normgene->exon
TC04000729.hg.1	5.87e-29	4.04e-30	13.7762	57.4549	1.1741	chr4(+):148402069-148466106
TC17001803.hg.1	1.02e-44	2.57e-46	19.3897	94.704	1.17404	chr17(-):62540735-62658386
TC0X000754.hg.1	1.33e-28	9.37e-30	13.6528	56.6159	1.17324	chrX(+):152953554-152962048
TC0X000341.hg.1	3.71e-44	9.62e-46	19.1833	93.3855	1.17293	chrX(+):56755677-56844813
TC11001296.hg.1	8.61e-24	8.28e-25	11.9785	45.2577	1.16966	chr11(-):3494803-3498281
TC06001386.hg.1	2.94e-43	7.99e-45	18.8538	91.2703	1.16952	chr6(-):27100095-27100575
TC06001424.hg.1	2.41e-35	1.09e-36	16.0093	72.5539	1.16805	chr6(-):27798952-27799306
TC10002678.hg.1	3.35e-37	1.34e-38	16.6672	76.9481	1.1677	chr10(-):65929847-65930169
TC07001195.hg.1	1.64e-19	2.14e-20	10.4631	35.1413	1.1674	chr7(-):23376079-23382719
TC05000298.hg.1	6.91e-34	3.43e-35	15.4971	69.1124	1.16516	chr5(+):68462837-68474072
PSR19006612.hg.1	6.93e-25	6.22e-26	12.3601	47.8374	1.16311	19521868
TC01000988.hg.1	6.89e-40	2.34e-41	17.6271	83.293	1.16261	chr1(+):112957339-112958909
TC21000211.hg.1	2.72e-34	1.32e-35	15.6393	70.0693	1.16218	chr21(+):44985070-44985529
TC20000386.hg.1	4.11e-45	1e-46	19.5372	95.6435	1.16214	chr20(+):47894715-47905797
TC16000384.hg.1	2.16e-46	4.85e-48	20.0152	98.6707	1.16194	chr16(+):31885079-31928627
TC02001103.hg.1	1.84e-27	1.39e-28	13.2565	53.9218	1.16188	chr2(+):189156396-189460653
TC01003029.hg.1	1.69e-38	6.23e-40	17.1298	80.0158	1.16137	chr1(-):117057156-117113715
TC05002400.hg.1	8.98e-45	2.25e-46	19.4107	94.8379	1.16104	chr5(+):61661136-61669597
TC02000547.hg.1	8.8e-31	5.36e-32	14.4114	61.7695	1.16102	chr2(+):89065324-89106126
TC08001990.hg.1	1.7e-24	1.57e-25	12.2243	46.9182	1.16069	chr8(+):79630315-79631995
TC08001639.hg.1	9.4e-33	5.06e-34	15.0989	66.4253	1.16052	chr8(-):130880836-130880962
3064820_st	7.47e-28	5.51e-29	13.3927	54.848	1.15845	normgene->exon
TC15002593.hg.1	6.77e-26	5.7e-27	12.7117	50.2214	1.15711	chr15(-):68650845-68661579
3607147_st	3.07e-41	9.49e-43	18.1169	86.4971	1.1567	normgene->exon
TC19000532.hg.1	1.63e-42	4.64e-44	18.5814	89.5122	1.1561	chr19(+):39138267-39222223
TC03000050.hg.1	2.7e-42	7.78e-44	18.5015	88.9954	1.15549	chr3(+):10028595-10046928
TC01003452.hg.1	4.36e-36	1.88e-37	16.2719	74.3119	1.15273	chr1(-):161952982-161993644
TC07000495.hg.1	2.64e-42	7.58e-44	18.5056	89.0222	1.15228	chr7(+):77166415-77269388
TC03001351.hg.1	2.39e-18	3.39e-19	10.0435	32.3945	1.15192	chr3(-):45796941-45838035
TC01003190.hg.1	5.78e-64	3.99e-66	27.1093	140.267	1.15152	chr1(-):149813505-149814478
TC01002963.hg.1	5.5e-28	4.03e-29	13.4389	55.1614	1.1512	chr1(-):110292702-110306649
TC11003463.hg.1	2.94e-55	3.84e-57	23.4515	119.61	1.15103	chr11(+):66512207-66610987
TC04001494.hg.1	1.02e-22	1.06e-23	11.6016	42.7193	1.15094	chr4(-):119201193-119274158
3213025_st	1.86e-44	4.77e-46	19.2928	94.0854	1.14994	normgene->exon
TC06001385.hg.1	5.85e-41	1.85e-42	18.015	85.8322	1.14967	chr6(-):27092762-27100572
TC01006056.hg.1	2.49e-17	3.83e-18	9.67103	29.9846	1.14954	chr1(-):205350506-205391214
TC14001296.hg.1	1.18e-44	2.98e-46	19.3665	94.5559	1.14866	chr14(-):74178486-74181128
TC13000879.hg.1	2.48e-38	9.28e-40	17.0695	79.6173	1.14784	chr13(-):111547406-111551519
TC17001984.hg.1	8.66e-41	2.76e-42	17.9533	85.4293	1.14734	chr17(-):80572438-80606411
TC03002566.hg.1	1.07e-37	4.19e-39	16.8425	78.1126	1.14734	chr3(+):141121660-141161439
TC01003889.hg.1	2.83e-35	1.28e-36	15.9854	72.3943	1.14581	chr1(-):225674534-225840845
TC02004779.hg.1	2.64e-25	2.3e-26	12.5063	48.8279	1.14494	chr2(-):201979497-201980387
3213023_st	3.78e-36	1.62e-37	16.294	74.4596	1.14484	normgene->exon
TC13000880.hg.1	1.54e-41	4.67e-43	18.2257	87.2049	1.14369	chr13(-):111551118-111554715
TC13000223.hg.1	9.83e-40	3.38e-41	17.5715	82.9279	1.14337	chr13(+):53029495-53050763
TC17000978.hg.1	4.69e-21	5.45e-22	11.015	38.7948	1.14307	chr17(-):1519486-1519589
TC02000996.hg.1	4.83e-25	4.29e-26	12.4148	48.2081	1.14304	chr2(+):169312372-169631644
TC12002368.hg.1	2.43e-38	9.11e-40	17.0724	79.6362	1.14272	chr12(+):53774012-53776058
TC16001498.hg.1	1.02e-30	6.23e-32	14.3893	61.6194	1.14258	chr16(+):31488264-31489279
TC02002592.hg.1	1.3e-44	3.28e-46	19.3515	94.4608	1.14231	chr2(-):183789605-183903586
TC06002112.hg.1	3.46e-20	4.28e-21	10.7059	36.7429	1.14101	chr6(-):132269316-132272518
TC06001799.hg.1	3.86e-41	1.2e-42	18.0805	86.2597	1.1408	chr6(-):52128807-52149582
TC08002008.hg.1	1.37e-32	7.45e-34	15.0415	66.0377	1.14076	chr8(+):90770370-90782052
TC11000482.hg.1	1.73e-33	8.86e-35	15.3565	68.1649	1.13957	chr11(+):58874658-58894888
PSR11023323.hg.1	1.39e-43	3.73e-45	18.9722	92.0318	1.13857	19381223
TC20000265.hg.1	1.88e-28	1.34e-29	13.6008	56.2623	1.13844	chr20(+):34708884-34708994
PSR02023997.hg.1	5.19e-33	2.74e-34	15.1895	67.0377	1.13802	19096695
TC02002745.hg.1	1.09e-45	2.54e-47	19.7532	97.0149	1.13798	chr2(-):215590370-215674428
TC13001090.hg.1	3.23e-27	2.5e-28	13.171	53.3409	1.13773	chr13(+):51287754-51289476
TC14001120.hg.1	3.22e-51	5.33e-53	21.8575	110.08	1.13736	chr14(-):50885211-50999376
TC02002207.hg.1	1.35e-33	6.86e-35	15.3944	68.4205	1.13685	chr2(-):111965353-112252692
TC05001408.hg.1	1.44e-39	5e-41	17.5118	82.5353	1.13637	chr5(-):64813593-64858998
TC01006147.hg.1	7.13e-36	3.12e-37	16.1962	73.8054	1.13542	chr1(-):223701568-223719668
TC13001638.hg.1	5.37e-24	5.11e-25	12.0499	45.7395	1.13488	chr13(-):95673861-95696687
TC05000709.hg.1	1.25e-28	8.77e-30	13.6624	56.6816	1.13488	chr5(+):138614469-138614668
TC01001731.hg.1	1.17e-31	6.73e-33	14.717	63.8415	1.13483	chr1(+):207207761-207254369
TC15000732.hg.1	1.15e-30	7.1e-32	14.3701	61.4892	1.13481	chr15(+):78857862-78887611
TC04001504.hg.1	4.01e-30	2.56e-31	14.1815	60.2091	1.13475	chr4(-):120415550-120550146
PSR01050378.hg.1	1.44e-41	4.36e-43	18.2361	87.2731	1.13442	19059825
PSR01050383.hg.1	1.1e-40	3.55e-42	17.9148	85.1778	1.13415	19059830
PSR01050371.hg.1	2.27e-31	1.34e-32	14.6159	63.1567	1.13407	19059818
2985941_st	1.02e-29	6.7e-31	14.04	59.248	1.13374	normgene->exon
TC17002825.hg.1	4.52e-53	6.73e-55	22.5815	114.448	1.133	chr17(-):79476997-79479892
TC06001213.hg.1	6.35e-21	7.45e-22	10.9682	38.4835	1.1326	chr6(-):1624035-2245926
TC20000389.hg.1	3.37e-33	1.76e-34	15.2551	67.4807	1.13259	chr20(+):47897220-47897309
TC01003240.hg.1	3.24e-56	3.89e-58	23.8424	121.898	1.13257	chr1(-):152004982-152020383
TC16001659.hg.1	8.68e-34	4.34e-35	15.4622	68.8774	1.13209	chr16(+):81421430-81424413
TC01001559.hg.1	1.28e-32	6.95e-34	15.0518	66.1072	1.1311	chr1(+):180123968-180173165
TC12002032.hg.1	2.14e-37	8.5e-39	16.7359	77.4045	1.13064	chr12(-):120123595-120315095
TC14001992.hg.1	6.01e-45	1.49e-46	19.4757	95.252	1.13024	chr14(-):45693512-45700373
TC11000694.hg.1	2.01e-68	9.29e-71	29.1179	150.912	1.12959	chr11(+):67351066-67354131
2985932_st	7.65e-41	2.43e-42	17.9728	85.5564	1.12904	normgene->exon
TC17001379.hg.1	3.19e-27	2.46e-28	13.1729	53.3538	1.12865	chr17(-):34242762-34242791
TC01003730.hg.1	7.55e-35	3.52e-36	15.835	71.3851	1.1286	chr1(-):204336927-204346793
PSR06007465.hg.1	2.31e-32	1.28e-33	14.9618	65.4987	1.12853	19217700
TC08000571.hg.1	3.62e-31	2.15e-32	14.5457	62.6803	1.12803	chr8(+):94870035-94938296
3213036_st	2.95e-32	1.64e-33	14.9249	65.249	1.12677	normgene->exon
TC05000757.hg.1	5.81e-20	7.31e-21	10.6252	36.2099	1.12626	chr5(+):140602504-140605865
TC0X001357.hg.1	3.96e-51	6.58e-53	21.8229	109.87	1.12421	chrX(-):129198849-129244691
TC07000385.hg.1	6.56e-38	2.52e-39	16.9188	78.6188	1.1237	chr7(+):64141511-64147264
TC06001217.hg.1	1.64e-22	1.72e-23	11.5291	42.2326	1.12328	chr6(-):2832566-2842240
TC13000860.hg.1	1.19e-28	8.38e-30	13.6692	56.7274	1.12213	chr13(-):107142079-107187462
3213032_st	2.4e-35	1.08e-36	16.0104	72.5616	1.12182	normgene->exon
TC01000837.hg.1	1.99e-36	8.35e-38	16.3932	75.1222	1.12159	chr1(+):89990395-90063423
TC12002012.hg.1	5.95e-26	4.98e-27	12.7315	50.3553	1.12123	chr12(-):117476728-117537284
2985930_st	2.65e-32	1.47e-33	14.9413	65.3603	1.12117	normgene->exon
TC01003174.hg.1	8.73e-27	6.93e-28	13.0211	52.3218	1.12042	chr1(-):149438750-149459549
TC17001644.hg.1	7.01e-27	5.54e-28	13.054	52.5454	1.12033	chr17(-):46668619-46671323
TC15002809.hg.1	4.82e-42	1.41e-43	18.4097	88.4002	1.11993	chr15(-):43956616-43982247
TC15000445.hg.1	6.24e-40	2.11e-41	17.6429	83.3966	1.11984	chr15(+):59063393-59154099
TC17002776.hg.1	8.92e-39	3.25e-40	17.2281	80.6658	1.11978	chr17(-):70380443-70588943
TC12003220.hg.1	8.3e-18	1.23e-18	9.84628	31.1151	1.11957	chr12(-):57422301-57444982
TC06003155.hg.1	1.07e-41	3.21e-43	18.2834	87.5806	1.11931	chr6(+):159032051-159034328
TC08000324.hg.1	4.99e-44	1.3e-45	19.1359	93.0822	1.11925	chr8(+):42010464-42029191
TC06001387.hg.1	1.42e-27	1.07e-28	13.2957	54.1883	1.11872	chr6(-):27106072-27114637
TC17002283.hg.1	1.63e-28	1.15e-29	13.6224	56.4092	1.11856	chr17(+):53239054-53241657
PSR01050384.hg.1	1.86e-33	9.52e-35	15.3458	68.0923	1.11782	19059831
TC03000502.hg.1	6.49e-29	4.48e-30	13.7609	57.3512	1.11771	chr3(+):99357319-99518070
TC04002268.hg.1	1.36e-27	1.02e-28	13.3017	54.2293	1.11761	chr4(+):152588376-152591654
TC02000862.hg.1	1.1e-45	2.57e-47	19.7519	97.0069	1.11718	chr2(+):132479948-132524977
3607151_st	1.38e-43	3.7e-45	18.9733	92.0386	1.117	normgene->exon
TC10000475.hg.1	1.92e-22	2.03e-23	11.5049	42.0704	1.11691	chr10(+):75668935-75677258
PSR01050376.hg.1	8.92e-38	3.46e-39	16.8712	78.3034	1.11675	19059823
TC07002368.hg.1	2.52e-27	1.94e-28	13.2084	53.5949	1.11613	chr7(+):64167992-64168490
TC06000737.hg.1	2.03e-17	3.1e-18	9.70398	30.1967	1.11553	chr6(+):74405508-74538041
PSR07002505.hg.1	3.86e-42	1.12e-43	18.4449	88.6285	1.11506	19244903
PSR02024009.hg.1	1.51e-49	2.76e-51	21.2133	106.138	1.11474	19096697
TC04000840.hg.1	2.09e-27	1.59e-28	13.2372	53.7905	1.11414	chr4(+):169765139-169765886
TC02001495.hg.1	3.14e-44	8.12e-46	19.2097	93.5541	1.11246	chr2(-):217730-266398
TC11002209.hg.1	5.13e-57	5.87e-59	24.1674	123.785	1.11152	chr11(-):95566044-95658479
PSR02024018.hg.1	4.05e-40	1.35e-41	17.7112	83.8448	1.11083	19096701
TC19001488.hg.1	3.49e-30	2.22e-31	14.2025	60.3513	1.1108	chr19(-):38187264-38210691
TC10000047.hg.1	7.35e-26	6.2e-27	12.6994	50.1376	1.10905	chr10(+):5454514-5500426
TC13000472.hg.1	9.32e-46	2.16e-47	19.7788	97.1769	1.10803	chr13(-):21946710-22033509
TC0X001939.hg.1	8.07e-45	2.01e-46	19.4279	94.948	1.10787	chrX(+):153698930-153699663
TC01000563.hg.1	3.53e-38	1.34e-39	17.0146	79.2535	1.10766	chr1(+):45205490-45233439
TC03002690.hg.1	3.2e-26	2.64e-27	12.8248	50.9891	1.10755	chr3(+):183015457-183016289
TC15001476.hg.1	7.77e-19	1.06e-19	10.2204	33.5492	1.10732	chr15(-):56720929-56757335
TC04000003.hg.1	1.61e-23	1.58e-24	11.8835	44.617	1.10702	chr4(+):130242-130349
TC03002155.hg.1	8.25e-32	4.72e-33	14.7692	64.1952	1.10699	chr3(-):195754054-195809060
TC01004671.hg.1	1.5e-41	4.54e-43	18.2301	87.2338	1.10659	chr1(+):120840137-120914842
TC01005497.hg.1	1.51e-31	8.76e-33	14.6781	63.5779	1.10644	chr1(-):54231134-54304225
TC01000427.hg.1	1.08e-46	2.38e-48	20.1281	99.382	1.10609	chr1(+):32757687-32799236
TC06001675.hg.1	8.98e-48	1.86e-49	20.5349	101.931	1.10572	chr6(-):36461669-36515256
TC15000433.hg.1	1.21e-27	9.03e-29	13.3203	54.3555	1.10531	chr15(+):56657625-56738195
TC04001384.hg.1	1.16e-32	6.3e-34	15.0664	66.2057	1.10518	chr4(-):91759636-91760263
TC01001685.hg.1	3.23e-23	3.22e-24	11.7776	43.9034	1.10435	chr1(+):203274619-203278730
TC20001202.hg.1	5.6e-26	4.69e-27	12.7403	50.4155	1.10352	chr20(+):35169919-35178224
TC12001136.hg.1	1.23e-21	1.36e-22	11.2216	40.1731	1.1035	chr12(-):6456009-6486525
TC03001926.hg.1	7.95e-28	5.87e-29	13.3835	54.7852	1.10334	chr3(-):155093369-155462856
TC09000544.hg.1	1.11e-31	6.42e-33	14.7238	63.8876	1.10277	chr9(+):109625378-109775915
TC16001125.hg.1	2.19e-34	1.05e-35	15.6729	70.2953	1.10256	chr16(-):54951749-54963101
TC07000796.hg.1	6.63e-19	9.02e-20	10.2452	33.7111	1.10205	chr7(+):128864855-129070052
TC20001565.hg.1	7.29e-37	2.98e-38	16.5476	76.1519	1.10068	chr20(-):35280169-35374541
PSR01050382.hg.1	2.35e-38	8.78e-40	17.0779	79.6728	1.10028	19059829
PSR16011483.hg.1	8.43e-43	2.35e-44	18.6868	90.1937	1.09976	19474655
TC01002886.hg.1	3.67e-20	4.54e-21	10.6968	36.6832	1.0994	chr1(-):94994732-95007413
TC06003537.hg.1	1.54e-33	7.82e-35	15.375	68.2891	1.09935	chr6(-):26055935-26056500
TC18000006.hg.1	6.63e-29	4.58e-30	13.7578	57.3297	1.09915	chr18(+):657604-673578
TC20000268.hg.1	1.33e-24	1.21e-25	12.2616	47.1708	1.09871	chr20(+):35169887-35178228
TC08001963.hg.1	2.97e-47	6.34e-49	20.3389	100.705	1.09811	chr8(+):70041903-70043442
TC07001245.hg.1	2.1e-42	6.01e-44	18.5413	89.2532	1.09793	chr7(-):30050203-30066300
TC21000730.hg.1	1.57e-20	1.9e-21	10.828	37.5524	1.09774	chr21(+):41014313-41031839
TC20000407.hg.1	7.39e-30	4.79e-31	14.0893	59.5827	1.09742	chr20(+):49348081-49373332
TC16000554.hg.1	3.27e-33	1.7e-34	15.2596	67.5107	1.09715	chr16(+):68298419-68335726
TC10002327.hg.1	1.19e-30	7.34e-32	14.3651	61.4551	1.09698	chr10(+):121578786-121588659
TC08002477.hg.1	4.55e-17	7.15e-18	9.57461	29.3654	1.09697	chr8(-):116580684-116581247
TC07002605.hg.1	1.66e-41	5.07e-43	18.2131	87.1229	1.09662	chr7(+):135242688-135333497
PSR07002503.hg.1	1.4e-34	6.65e-36	15.7406	70.7504	1.09562	19244901
TC11001833.hg.1	3.45e-19	4.6e-20	10.3473	34.3798	1.09544	chr11(-):59548786-59549193
TC11001884.hg.1	4.41e-35	2.03e-36	15.9173	71.9374	1.09522	chr11(-):62619460-62623386
TC05000497.hg.1	4.99e-34	2.44e-35	15.5473	69.4503	1.09512	chr5(+):102089685-102366809
PSR02024034.hg.1	2.66e-51	4.39e-53	21.8895	110.274	1.09452	19096711
TC01000987.hg.1	4.02e-53	5.97e-55	22.6016	114.569	1.09422	chr1(+):112938800-113006078
TC02001193.hg.1	4.28e-37	1.73e-38	16.6294	76.6963	1.09392	chr2(+):203499901-203634480
TC15001337.hg.1	9.58e-41	3.06e-42	17.9374	85.3255	1.09357	chr15(-):49030132-49103343
TC22000220.hg.1	5.82e-56	7.07e-58	23.74	121.301	1.09313	chr22(+):31365634-31375380
TC10002355.hg.1	3.03e-45	7.31e-47	19.587	95.96	1.09259	chr10(+):129796776-129798365
TC02003767.hg.1	2.7e-40	8.9e-42	17.7745	84.2598	1.09198	chr2(+):202122770-202146582
TC07001993.hg.1	3.5e-40	1.17e-41	17.7335	83.9911	1.09042	chr7(-):148504464-148581441
TC04000319.hg.1	3.49e-28	2.52e-29	13.5075	55.6285	1.08992	chr4(+):56212276-56239266
TC20001373.hg.1	4.08e-33	2.14e-34	15.2258	67.2828	1.08937	chr20(-):1290555-1373816
TC12001643.hg.1	3.75e-18	5.38e-19	9.9727	31.9345	1.08885	chr12(-):59265931-59314303
TC11001724.hg.1	4.27e-42	1.25e-43	18.4286	88.5232	1.08849	chr11(-):46764598-46867859
TC05001331.hg.1	9.2e-24	8.87e-25	11.9683	45.189	1.08678	chr5(-):49692026-49739082
TC17001952.hg.1	2.05e-39	7.21e-41	17.4562	82.1694	1.08623	chr17(-):79476997-79479892
TC02001911.hg.1	1.16e-28	8.11e-30	13.674	56.7599	1.08595	chr2(-):64319786-64371605
TC01005050.hg.1	2.82e-33	1.46e-34	15.2824	67.6648	1.08534	chr1(+):222906203-222908533
TC0X002150.hg.1	9.31e-51	1.59e-52	21.6783	108.988	1.08522	chrX(-):99193206-99193518
TC08001683.hg.1	1.02e-29	6.7e-31	14.0401	59.2486	1.085	chr8(-):141530255-141539600
TC11002736.hg.1	4.06e-38	1.54e-39	16.9927	79.1088	1.08427	chr11(+):67064099-67065527
TC03001227.hg.1	1.55e-28	1.1e-29	13.6296	56.4582	1.08338	chr3(-):20202085-20227784
PSR06007475.hg.1	4.82e-36	2.09e-37	16.2563	74.2078	1.08321	19217707
TC12000749.hg.1	2.45e-38	9.16e-40	17.0715	79.6307	1.08282	chr12(+):97301001-97347469
TC19001805.hg.1	9.68e-43	2.71e-44	18.6646	90.0504	1.08123	chr19(-):53300661-53324922
TC06002746.hg.1	5.11e-51	8.59e-53	21.7793	109.604	1.08117	chr6(+):34204650-34214007
TC18000114.hg.1	4.04e-32	2.27e-33	14.8771	64.9259	1.07999	chr18(+):23806409-23971650
TC07002132.hg.1	2e-22	2.11e-23	11.4989	42.0298	1.07944	chr7(+):7284225-7288212
PSR02024032.hg.1	1.64e-45	3.87e-47	19.687	96.595	1.0792	19096709
TC02000674.hg.1	5.05e-32	2.85e-33	14.8434	64.6973	1.07784	chr2(+):110744557-110753809
TC12003210.hg.1	5.24e-38	2e-39	16.9536	78.8494	1.07779	chr12(+):11802788-12048325
TC06003812.hg.1	1.75e-43	4.71e-45	18.9358	91.7979	1.07737	chr6(-):114257320-114292359
TC12002179.hg.1	1.09e-40	3.51e-42	17.9168	85.1909	1.07679	chr12(+):2986365-2998626
TC06000761.hg.1	7.38e-34	3.67e-35	15.487	69.0445	1.07633	chr6(+):80713604-80752244
TC20001205.hg.1	3.68e-45	8.93e-47	19.5556	95.7605	1.07618	chr20(+):35973088-36011196
TC05003276.hg.1	8.04e-21	9.51e-22	10.9316	38.2403	1.07617	chr5(-):141202480-141204895
TC08000545.hg.1	2.16e-28	1.54e-29	13.5796	56.1183	1.07602	chr8(+):90769975-90803292
PSR01050380.hg.1	8.4e-46	1.95e-47	19.7956	97.2832	1.07452	19059827
TC09000463.hg.1	2.18e-47	4.61e-49	20.3896	101.023	1.07411	chr9(+):97136833-97223324
TC15001330.hg.1	5.02e-18	7.29e-19	9.92626	31.6332	1.07408	chr15(-):48431625-48470714
TC01003343.hg.1	2.62e-42	7.52e-44	18.5069	89.0303	1.07403	chr1(-):156495197-156542396
TC12002997.hg.1	1.12e-31	6.48e-33	14.7225	63.8786	1.07387	chr12(-):89813498-89920039
TC12001282.hg.1	1.47e-30	9.11e-32	14.3334	61.2401	1.07276	chr12(-):15773075-15942510
PSR02024013.hg.1	6.74e-45	1.67e-46	19.4572	95.1345	1.07258	19096698
TC08002102.hg.1	4.11e-27	3.2e-28	13.1345	53.0925	1.07209	chr8(+):129029972-129031542
TC02000546.hg.1	6.34e-35	2.94e-36	15.862	71.5658	1.07123	chr2(+):88991162-89050452
TC09000941.hg.1	6.58e-32	3.74e-33	14.8036	64.4283	1.07061	chr9(-):20341663-20622542
TC02002378.hg.1	3.25e-20	4.01e-21	10.7157	36.8079	1.07057	chr2(-):136871919-136875735
TC01003706.hg.1	4.84e-43	1.33e-44	18.7746	90.7597	1.07037	chr1(-):202696526-202778598
TC04001724.hg.1	6.61e-32	3.75e-33	14.8029	64.4236	1.07037	chr4(-):170015361-170192256
TC12002939.hg.1	7.54e-19	1.03e-19	10.2252	33.5801	1.07022	chr12(-):67364375-67366403
TC16001084.hg.1	5.58e-45	1.37e-46	19.4879	95.3298	1.06886	chr16(-):46691891-46723144
TC16000968.hg.1	1.33e-24	1.21e-25	12.2619	47.1726	1.06838	chr16(-):23701626-23724821
TC16001137.hg.1	1.33e-19	1.71e-20	10.4968	35.3626	1.06783	chr16(-):57290009-57318599
TC21000202.hg.1	7.65e-42	2.27e-43	18.3366	87.9263	1.06652	chr21(+):43916118-44001550
TC12001797.hg.1	2.28e-32	1.26e-33	14.9639	65.5128	1.0663	chr12(-):89813495-89920039
PSR02023977.hg.1	6.01e-36	2.62e-37	16.2226	73.9822	1.06562	19096680
TC07002367.hg.1	2.72e-37	1.09e-38	16.6992	77.1607	1.06541	chr7(+):64141511-64147263
TC16001990.hg.1	3.52e-22	3.78e-23	11.4126	41.451	1.06473	chr16(-):84649611-84650115
TC07001143.hg.1	1.06e-28	7.42e-30	13.687	56.8482	1.06381	chr7(-):8152814-8302317
TC06001214.hg.1	1.59e-18	2.22e-19	10.1082	32.8165	1.06365	chr6(-):1727167-1729106
TC06003728.hg.1	1.67e-45	3.96e-47	19.6834	96.5726	1.06343	chr6(-):79654800-79675673
TC11000715.hg.1	4.66e-19	6.27e-20	10.3004	34.0728	1.0632	chr11(+):69061605-69182494
TC08001232.hg.1	1.03e-26	8.24e-28	12.9958	52.1503	1.06319	chr8(-):57212207-57233335
TC03001269.hg.1	2.5e-39	8.81e-41	17.4259	81.97	1.06287	chr3(-):31699382-32119072
PSR02024022.hg.1	8.56e-48	1.77e-49	20.543	101.981	1.06273	19096704
TC19001388.hg.1	3.48e-36	1.49e-37	16.3068	74.5451	1.06195	chr19(-):33087907-33166102
PSR02023987.hg.1	3.16e-17	4.89e-18	9.63332	29.7421	1.0618	19096687
TC06000223.hg.1	6.38e-33	3.39e-34	15.1578	66.8232	1.06141	chr6(+):27100817-27103071
TC15001612.hg.1	1.23e-41	3.7e-43	18.2616	87.4385	1.06102	chr15(-):70946893-71055932
TC14001348.hg.1	3.33e-42	9.62e-44	18.4688	88.7838	1.05997	chr14(-):77972340-78083116
TC11000727.hg.1	3e-47	6.42e-49	20.3368	100.692	1.05982	chr11(+):70244510-70282690
2985911_st	2.23e-35	1.01e-36	16.0216	72.6363	1.05929	normgene->exon
TC15000578.hg.1	4.34e-20	5.41e-21	10.6707	36.5105	1.05775	chr15(+):63334831-63364114
TC05002649.hg.1	9.54e-29	6.65e-30	13.7031	56.958	1.05771	chr5(+):138614469-138614668
TC06003906.hg.1	5.58e-19	7.55e-20	10.2721	33.8871	1.05718	chr6(-):144263762-144385648
PSR01050372.hg.1	3.28e-32	1.83e-33	14.9086	65.139	1.05653	19059819
PSR02024015.hg.1	1.5e-33	7.64e-35	15.3783	68.3117	1.05628	19096699
TC0X001727.hg.1	4.64e-41	1.45e-42	18.0515	86.0707	1.05602	chrX(+):56755677-56844804
PSR02024033.hg.1	1.08e-57	1.17e-59	24.4473	125.4	1.05598	19096710
TC12000076.hg.1	3.49e-33	1.82e-34	15.2496	67.4436	1.05586	chr12(+):6308881-6347437
TC20000388.hg.1	1.41e-28	9.97e-30	13.6437	56.5538	1.0555	chr20(+):47896850-47896952
PSR02024020.hg.1	1.45e-50	2.5e-52	21.6044	108.537	1.05509	19096702
TC08002016.hg.1	2.84e-33	1.47e-34	15.2813	67.6574	1.05432	chr8(+):94767072-94831460
TC06001136.hg.1	1.53e-37	6.02e-39	16.7879	77.7498	1.05432	chr6(+):159047471-159049322
TC22001070.hg.1	5.54e-55	7.39e-57	23.3403	118.956	1.05422	chr22(+):31365262-31375381
TC04001514.hg.1	2.42e-23	2.4e-24	11.8214	44.1981	1.05353	chr4(-):122589110-122618268
TC17002907.hg.1	1.12e-27	8.33e-29	13.3322	54.4362	1.05341	chr17(-):39910856-39943183
TC06001010.hg.1	1.41e-20	1.69e-21	10.8452	37.6664	1.05329	chr6(+):135502453-135540311
TC16001854.hg.1	2.98e-27	2.3e-28	13.1831	53.4226	1.05313	chr16(-):32888797-32896463
TC01001026.hg.1	2.26e-43	6.1e-45	18.8956	91.5391	1.05265	chr1(+):117602925-117645492
TC15000324.hg.1	6.24e-31	3.77e-32	14.463	62.1195	1.05251	chr15(+):43425722-43477341
PSR19006629.hg.1	3.89e-30	2.48e-31	14.1861	60.24	1.05181	19521881
TC08000332.hg.1	7.74e-31	4.7e-32	14.4306	61.8998	1.05176	chr8(+):42948657-42978577
2985926_st	3.66e-48	7.36e-50	20.6832	102.856	1.05153	normgene->exon
TC10000145.hg.1	2.32e-20	2.84e-21	10.7677	37.1521	1.05128	chr10(+):20105168-20569286
TC0X000376.hg.1	1.13e-39	3.91e-41	17.5494	82.7825	1.05115	chrX(+):69509879-69640774
TC07001264.hg.1	1.99e-37	7.89e-39	16.7471	77.4789	1.05051	chr7(-):33053742-33102409
TC12003230.hg.1	4.87e-41	1.53e-42	18.0441	86.0224	1.05033	chr12(+):3000033-3050306
TC06001348.hg.1	2.11e-34	1.01e-35	15.6784	70.3326	1.04999	chr6(-):26188938-26189304
TC08001432.hg.1	3.7e-22	3.98e-23	11.4049	41.3992	1.04997	chr8(-):95261481-95274578
TC06001133.hg.1	9.06e-42	2.7e-43	18.3097	87.7514	1.04919	chr6(+):158957466-159056467
TC15002634.hg.1	3.25e-28	2.34e-29	13.5184	55.7024	1.04769	chr15(-):77333726-77335144
TC12000062.hg.1	5.34e-31	3.2e-32	14.4871	62.2833	1.04715	chr12(+):4647950-4669214
TC07001635.hg.1	3.78e-28	2.73e-29	13.4956	55.5473	1.047	chr7(-):97920962-98030427
TC04000299.hg.1	5.45e-31	3.27e-32	14.4842	62.2634	1.04689	chr4(+):53579416-53579537
TC01001653.hg.1	6.24e-48	1.28e-49	20.5948	102.305	1.04638	chr1(+):200860469-200884864
TC17002149.hg.1	7.4e-38	2.85e-39	16.9002	78.4957	1.04542	chr17(+):27873905-27879377
3520345_st	1.08e-28	7.57e-30	13.6842	56.8293	1.04469	normgene->exon
TC08001681.hg.1	3.19e-35	1.45e-36	15.9671	72.2711	1.04455	chr8(-):141111257-141113775
PSR19006616.hg.1	7.57e-31	4.6e-32	14.4338	61.9217	1.0438	19521872
TC03003098.hg.1	2.55e-46	5.75e-48	19.9884	98.5015	1.04363	chr3(-):133319450-133380690
TC06003298.hg.1	3.26e-17	5.05e-18	9.62842	29.7107	1.04319	chr6(-):1727169-1729106
TC06000167.hg.1	2.28e-27	1.74e-28	13.2239	53.7	1.04245	chr6(+):26124373-26139336
TC04002939.hg.1	8.16e-39	2.96e-40	17.242	80.7574	1.04173	chr4(+):159131346-159176563
TC01002534.hg.1	1.19e-33	6.04e-35	15.4131	68.5466	1.03816	chr1(-):39351479-39407471
PSR02023974.hg.1	2.72e-27	2.09e-28	13.1971	53.5179	1.03793	19096679
TC13001444.hg.1	1.41e-23	1.38e-24	11.9029	44.7479	1.03774	chr13(-):41447704-41455780
TC13000392.hg.1	6.96e-41	2.21e-42	17.9877	85.6542	1.0377	chr13(+):110958159-111165374
TC02000735.hg.1	3.11e-44	8.05e-46	19.2111	93.5631	1.03688	chr2(+):114647537-114720173
TC07000843.hg.1	5.61e-41	1.77e-42	18.0217	85.8762	1.03644	chr7(+):135242662-135333505
TC02003487.hg.1	2.18e-30	1.36e-31	14.274	60.8372	1.03623	chr2(+):109301978-109303697
TC20000928.hg.1	2.4e-28	1.72e-29	13.5639	56.0116	1.03567	chr20(-):48249482-48330421
TC16001066.hg.1	5.69e-30	3.67e-31	14.1284	59.8486	1.0356	chr16(-):32888797-32896463
TC09001769.hg.1	3.97e-31	2.36e-32	14.532	62.5876	1.03537	chr9(-):140194083-140196703
TC05003082.hg.1	7.73e-23	7.93e-24	11.6443	43.0067	1.03515	chr5(-):73924208-73924524
TC08001191.hg.1	1.15e-36	4.75e-38	16.4776	75.6851	1.0341	chr8(-):48685669-48872743
3520347_st	4.7e-29	3.22e-30	13.8096	57.6819	1.03401	normgene->exon
TC02003886.hg.1	2.66e-52	4.12e-54	22.2802	112.638	1.03354	chr2(+):232573236-232578249
TC11003149.hg.1	2.45e-37	9.77e-39	16.7151	77.2661	1.03353	chr11(-):46832553-46867829
TC01003624.hg.1	3.49e-24	3.29e-25	12.1149	46.1789	1.03284	chr1(-):184759858-184943682
TC06000634.hg.1	3.33e-28	2.4e-29	13.5147	55.677	1.0328	chr6(+):47456803-47456906
TC03003291.hg.1	3.8e-24	3.59e-25	12.1019	46.0911	1.03264	chr3(-):195661428-195664588
TC17002246.hg.1	2.07e-27	1.57e-28	13.2387	53.801	1.0326	chr17(+):44620700-44622821
TC05003396.hg.1	1.46e-47	3.04e-49	20.456	101.439	1.03166	chr5(+):61601989-61683011
TC13000100.hg.1	7.97e-21	9.41e-22	10.9331	38.2499	1.03163	chr13(+):31287615-31338565
TC08001599.hg.1	7.57e-30	4.91e-31	14.0856	59.5577	1.02899	chr8(-):125323159-125384940
PSR11023321.hg.1	1.87e-39	6.54e-41	17.471	82.2669	1.02866	19381221
PSR02024023.hg.1	3.21e-41	9.94e-43	18.1099	86.4509	1.02792	19096705
TC07001563.hg.1	1.95e-18	2.74e-19	10.076	32.6065	1.02791	chr7(-):81575760-82073114
TC18000741.hg.1	4.46e-23	4.5e-24	11.7284	43.5719	1.02732	chr18(+):57567237-57571537
TC15000337.hg.1	8.55e-37	3.51e-38	16.5231	75.9881	1.0273	chr15(+):44119112-44160617
TC05000604.hg.1	1.14e-35	5.06e-37	16.1241	73.3234	1.02676	chr5(+):126112315-126172712
TC15000357.hg.1	6.63e-25	5.94e-26	12.3669	47.884	1.02671	chr15(+):45722727-45725647
TC06002403.hg.1	3.81e-25	3.36e-26	12.4507	48.4512	1.02574	chr6(+):1612577-1614127
TC04001741.hg.1	2.77e-41	8.54e-43	18.133	86.6017	1.02562	chr4(-):174252527-174256276
TC18000088.hg.1	6.84e-40	2.32e-41	17.6286	83.3025	1.02467	chr18(+):19192260-19210208
TC11002262.hg.1	1.66e-49	3.02e-51	21.1985	106.047	1.02459	chr11(-):107661717-107799019
TC17002570.hg.1	2.49e-33	1.29e-34	15.3014	67.7927	1.02458	chr17(-):27041299-27045251
TC05001307.hg.1	8.54e-29	5.94e-30	13.7197	57.0711	1.02432	chr5(-):41730167-41870791
TC18000021.hg.1	7.81e-20	9.92e-21	10.5793	35.9068	1.02383	chr18(+):3603736-3608323
TC12001472.hg.1	1.56e-45	3.68e-47	19.6952	96.647	1.02349	chr12(-):49578579-49583107
TC12002540.hg.1	4.81e-18	6.97e-19	9.9332	31.6782	1.02342	chr12(+):102601069-102601764
TC10000644.hg.1	2.94e-29	1.98e-30	13.8807	58.165	1.02314	chr10(+):91461367-91534700
TC19002180.hg.1	2.03e-39	7.11e-41	17.4584	82.1836	1.02254	chr19(+):47634115-47713893
TC13001682.hg.1	5.72e-18	8.36e-19	9.9054	31.4979	1.02204	chr13(-):110885115-110886524
TC20000216.hg.1	5.99e-54	8.43e-56	22.9294	116.524	1.02186	chr20(+):31407699-31438211
TC02003392.hg.1	2.46e-30	1.55e-31	14.2556	60.7118	1.02167	chr2(+):89065324-89106853
TC01001473.hg.1	7.26e-26	6.12e-27	12.7013	50.1507	1.02163	chr1(+):169074935-169101960
PSR01050375.hg.1	3.39e-37	1.36e-38	16.6651	76.9341	1.02147	19059822
2985937_st	6.89e-37	2.81e-38	16.5563	76.2096	1.02136	normgene->exon
TC22000224.hg.1	8.1e-27	6.42e-28	13.0324	52.3991	1.02114	chr22(+):31608225-31676066
TC08000213.hg.1	2.53e-26	2.07e-27	12.8603	51.2297	1.02093	chr8(+):27629466-27670157
TC15000704.hg.1	6.58e-35	3.05e-36	15.8562	71.5273	1.02008	chr15(+):76135622-76193419
TC10002932.hg.1	5.53e-50	9.84e-52	21.3807	107.167	1.0198	chr10(-):14939358-15063862
TC19001595.hg.1	5.51e-27	4.32e-28	13.0904	52.7932	1.01912	chr19(-):44270685-44285409
TC04001908.hg.1	7.57e-50	1.36e-51	21.328	106.844	1.01909	chr4(+):11370661-11375365
TC05002675.hg.1	1.61e-22	1.69e-23	11.5323	42.2541	1.01877	chr5(+):142605733-142608561
TC10002943.hg.1	1.86e-36	7.82e-38	16.4031	75.1883	1.01835	chr10(+):97454774-97637023
TC08002306.hg.1	6.26e-23	6.38e-24	11.6766	43.2233	1.01806	chr8(-):42038018-42040295
TC06001341.hg.1	1.43e-40	4.61e-42	17.875	84.9176	1.01767	chr6(-):26027043-26027480
TC22000455.hg.1	4.27e-51	7.11e-53	21.8103	109.793	1.01644	chr22(-):16255919-16256227
TC05003257.hg.1	5.28e-25	4.71e-26	12.4011	48.1156	1.01613	chr5(-):137627772-137666776
TC01002834.hg.1	1.77e-37	7e-39	16.7652	77.5994	1.01588	chr1(-):86786611-86862025
TC03000986.hg.1	7.28e-50	1.3e-51	21.335	106.886	1.01581	chr3(+):183415606-183530413
3213021_st	4.38e-21	5.07e-22	11.0256	38.8658	1.01555	normgene->exon
TC07000384.hg.1	7.34e-42	2.18e-43	18.3432	87.9686	1.01508	chr7(+):64126501-64171404
TC07002083.hg.1	3.51e-39	1.25e-40	17.3734	81.6242	1.01493	chr7(-):158424003-158497520
TC11003017.hg.1	4.37e-25	3.88e-26	12.4298	48.3095	1.01486	chr11(-):3495285-3498281
TC08002553.hg.1	1.65e-47	3.46e-49	20.4353	101.309	1.01293	chr8(-):142250099-142276581
TC01000931.hg.1	1.85e-40	6.04e-42	17.8338	84.6477	1.01225	chr1(+):109102711-109187522
TC07002184.hg.1	1.73e-30	1.08e-31	14.309	61.0743	1.01082	chr7(+):20371600-20392980
TC06000169.hg.1	9.79e-34	4.92e-35	15.4437	68.7523	1.01071	chr6(+):26158349-26171577
TC03000917.hg.1	4.01e-30	2.56e-31	14.1813	60.2075	1.00979	chr3(+):170075466-170114637
TC19001795.hg.1	7.48e-45	1.86e-46	19.4402	95.0261	1.00836	chr19(-):52567719-52599018
TC12002416.hg.1	3.76e-39	1.34e-40	17.3629	81.5545	1.00824	chr12(+):65004293-65091347
TC12000007.hg.1	2.17e-31	1.28e-32	14.6225	63.2013	1.00794	chr12(+):569530-672675
TC17001769.hg.1	2.66e-23	2.64e-24	11.8071	44.1019	1.0075	chr17(-):59756547-59940920
TC16000638.hg.1	6.35e-32	3.6e-33	14.8091	64.4652	1.00743	chr16(+):81348571-81413940
TC06003619.hg.1	2.03e-37	8.06e-39	16.744	77.4584	1.00715	chr6(-):35800811-35888957
TC21000735.hg.1	1.12e-27	8.37e-29	13.3313	54.4305	1.00567	chr21(+):42582896-42585127
TC17_ctg5_hap1000002.hg.1	8.86e-21	1.05e-21	10.9165	38.14	1.00554	chr17_ctg5_hap1(+):195721-200597
[truncated: 9,895 more rows]
